# Supplementary material
Source: PubMed Central journal article supplement (PMC4390554)
Supplement: NIHMS672759-supplement-Table_S3.pdf [file NIHMS672759-supplement-Table_S3.pdf]

**Table S3. Enriched peaks and their associated genes identified by SPCH ChIP-Seq**

1: For peak location, the first and second numbers indicate the chromosome number and the nucleotide position on the chromosome, respectively.

2: Category of gene structure: promoter (&lt; 0.5 kb to TSS), distal promoter (0.5-3kb to TSS), 5'UTR, exon, intron, 3'UTR, downstream (1kb to TSS), or intergenic. TSS, transcription start site.

| AGI       | Gene symbol                         | Description       | Peak location <sup>1</sup> | Peak score | Gene structure <sup>2</sup> |
|-----------|-------------------------------------|-------------------|----------------------------|------------|-----------------------------|
| AT1G80070 | ABNORMAL SUSPENSOR 2 (SUS2)         | a genetic locus   | 1_30129721                 | 124.01     | intergenic                  |
| AT1G80080 | TOO MANY MOUTHS (TMM)               | Encodes a trans   | 1_30129721                 | 124.01     | promoter                    |
| AT4G25610 | na                                  | C2H2-like zinc f  | 4_13069981                 | 105.03     | intergenic                  |
| AT4G25620 | na                                  | hydroxyproline-i  | 4_13069981                 | 105.03     | promoter                    |
| AT1G19670 | CHLOROPHYLLASE 1 (CLH1)             | Chlorophyllase i  | 1_6803197                  | 82.46      | intergenic                  |
| AT1G19680 | na                                  | RING/U-box suj    | 1_6803197                  | 82.46      | proximal promoter           |
| AT1G19660 | na                                  | Wound-respons     | 1_6803197                  | 82.46      | proximal promoter           |
| AT3G26744 | INDUCER OF CBF EXPRESSION 1 (ICE1)  | Encodes a MYC     | 3_9835078                  | 81.19      | five_prime_UTR              |
| AT3G26742 | na                                  | unknown protei    | 3_9835078                  | 81.19      | intergenic                  |
| AT5G26160 | na                                  | unknown protei    | 5_9142944                  | 69.37      | five_prime_UTR              |
| AT5G23860 | TUBULIN BETA 8 (TUB8)               | beta-tubulin, pre | 5_8042044                  | 60.83      | proximal promoter           |
| AT1G20657 | na                                  | Pseudogene of     | 1_7163767                  | 57.72      | proximal promoter           |
| AT1G20670 | na                                  | DNA-binding br    | 1_7163767                  | 57.72      | intergenic                  |
| AT5G06710 | HOMEODOMAIN FROM ARABIDOPSIS THAL   | Homeobox-leuc     | 5_2074455                  | 57.06      | intergenic                  |
| AT1G25550 | na                                  | myb-like transcr  | 1_8975771                  | 53.14      | proximal promoter           |
| AT1G25540 | PHYTOCHROME AND FLOWERING TIME      | Encodes a nucl    | 1_8975771                  | 53.14      | proximal promoter           |
| AT5G53210 | SPEECHLESS (SPCH)                   | Encodes a basi    | 5_21589130                 | 53.01      | promoter                    |
| AT3G15790 | METHYL-CPG-BINDING DOMAIN 11 (MB    | Protein containi  | 3_5342783                  | 52.72      | promoter                    |
| AT3G15780 | na                                  | unknown protei    | 3_5342783                  | 52.72      | downstream                  |
| AT2G34510 | na                                  | FUNCTIONS IN      | 2_14545598                 | 51.78      | intron                      |
| AT4G00480 | (ATMYC1)                            | MYC-related pr    | 4_221016                   | 51.1       | proximal promoter           |
| AT4G00490 | BETA-AMYLASE 2 (BAM2)               | Encodes a chlo    | 4_221016                   | 51.1       | proximal promoter           |
| AT1G12840 | DE-ETIOLATED 3 (DET3)               | Encodes subun     | 1_4379555                  | 50.7       | intergenic                  |
| AT1G12845 | na                                  | unknown protei    | 1_4379555                  | 50.7       | promoter                    |
| AT1G12850 | na                                  | Phosphoglycer     | 1_4379555                  | 50.7       | downstream                  |
| AT5G01990 | na                                  | Auxin efflux can  | 5_379718                   | 49.97      | five_prime_UTR              |
| AT5G02000 | na                                  | unknown protei    | 5_379718                   | 49.97      | intergenic                  |
| AT1G01040 | DICER-LIKE 1 (DCL1)                 | Encodes a Dice    | 1_21171                    | 49.8       | proximal promoter           |
| AT1G11840 | GLYOXALASE 1 HOMOLOG (GLX1)         | Encodes a glyo    | 1_3995144                  | 49.79      | promoter                    |
| AT1G11820 | na                                  | O-Glycosyl hyd    | 1_3995144                  | 49.79      | proximal promoter           |
| AT2G02440 | na                                  | unknown protei    | 2_640895                   | 49.36      | intergenic                  |
| AT1G23710 | na                                  | Protein of unkn   | 1_8384902                  | 48.43      | promoter                    |
| AT1G10652 | na                                  | unknown protei    | 1_3527672                  | 48.28      | promoter                    |
| AT3G57550 | GUANYLATE KINASE (AGK2)             | guanylate kinas   | 3_21309941                 | 47.88      | intergenic                  |
| AT3G57560 | N-ACETYL-L-GLUTAMATE KINASE (NAG    | encodes a N-ac    | 3_21309941                 | 47.88      | intergenic                  |
| AT3G08680 | na                                  | Leucine-rich ref  | 3_2636889                  | 46.79      | proximal promoter           |
| AT3G08670 | na                                  | unknown protei    | 3_2636889                  | 46.79      | downstream                  |
| AT1G06410 | TREHALOSE-PHOSPHATASE/SYNTHAS       | Encodes an enz    | 1_1953916                  | 45.77      | proximal promoter           |
| AT2G23460 | EXTRA-LARGE G-PROTEIN 1 (XLG1)      | encodes a nove    | 2_9995300                  | 44.53      | promoter                    |
| AT1G12855 | na                                  | F-box family pr   | 1_4384491                  | 43.14      | intergenic                  |
| AT1G12860 | SCREAM 2 (SCRM2)                    | Encodes ICE2 (    | 1_4384491                  | 43.14      | five_prime_UTR              |
| AT1G19220 | AUXIN RESPONSE FACTOR 19 (ARF19)    | Encodes an aux    | 1_6627905                  | 42.74      | downstream                  |
| AT1G19210 | na                                  | encodes a mem     | 1_6627905                  | 42.74      | promoter                    |
| AT4G08949 | na                                  | This gene enc     | 4_5738933                  | 42.07      | downstream                  |
| AT4G18940 | na                                  | RNA ligase/cycl   | 4_10374879                 | 42.05      | intergenic                  |
| AT4G18950 | na                                  | Integrin-linked p | 4_10374879                 | 42.05      | promoter                    |
| AT3G22760 | (SOL1)                              | CXC domain co     | 3_8043179                  | 41.52      | proximal promoter           |
| AT4G14770 | TESMIN/TSO1-LIKE CXC 2 (TCX2)       | TESMIN/TSO1-      | 4_8486311                  | 41.52      | proximal promoter           |
| AT2G04880 | ZINC-DEPENDENT ACTIVATOR PROTEI     | Encodes WRKY      | 2_1717691                  | 41.29      | promoter                    |
| AT3G20820 | na                                  | Leucine-rich ref  | 3_7282625                  | 40.84      | intergenic                  |
| AT1G33930 | na                                  | P-loop containi   | 1_12324210                 | 40.19      | intron                      |
| AT5G60880 | BREAKING OF ASYMMETRY IN THE STC    | Encodes BASL      | 5_24489902                 | 40.05      | promoter                    |
| AT1G69010 | BES1-INTERACTING MYC-LIKE PROTEI    | BES1-interacti    | 1_25941517                 | 39.71      | promoter                    |
| AT1G69000 | na                                  | pre-tRNA; tRNA    | 1_25941517                 | 39.71      | intergenic                  |
| AT2G34500 | CYTOCHROME P450, FAMILY 710, SUBF   | Encodes a prot    | 2_14538726                 | 39.69      | intergenic                  |
| AT2G34490 | CYTOCHROME P450, FAMILY 710, SUBF   | Encodes a prot    | 2_14538726                 | 39.69      | proximal promoter           |
| AT1G34245 | EPIDERMAL PATTERNING FACTOR 2 (E    | Encodes a secr    | 1_12472119                 | 39.59      | proximal promoter           |
| AT1G54100 | ALDEHYDE DEHYDROGENASE 7B4 (AL      | Aldehyde dehyd    | 1_20199174                 | 39.34      | promoter                    |
| AT1G54110 | na                                  | Membrane fusic    | 1_20199174                 | 39.34      | promoter                    |
| AT3G20015 | na                                  | Eukaryotic aspa   | 3_6977786                  | 38.54      | intergenic                  |
| AT2G46360 | na                                  | unknown protei    | 2_19027906                 | 38.13      | proximal promoter           |
| AT2G46340 | SUPPRESSOR OF PHYA-105 1 (SPA1)     | Encodes a mem     | 2_19027906                 | 38.13      | promoter                    |
| AT1G66160 | CYS, MET, PRO, AND GLY PROTEIN 1 (C | CYS, MET, PRC     | 1_24637048                 | 37.94      | promoter                    |
| AT1G66170 | MALE MEIOCYTE DEATH 1 (MMD1)        | encodes a PHD     | 1_24637048                 | 37.94      | intergenic                  |
| AT5G07200 | GIBBERELLIN 20-OXIDASE 3 (GA20OX3)  | encodes a gibb    | 5_2241789                  | 37.51      | intergenic                  |
| AT1G72450 | JASMONATE-ZIM-DOMAIN PROTEIN 6 (    | JAZ6 transcript   | 1_27276767                 | 37.17      | promoter                    |
| AT1G80630 | na                                  | RNI-like superf   | 1_30310990                 | 37         | promoter                    |
| AT1G80640 | na                                  | Protein kinase s  | 1_30310990                 | 37         | proximal promoter           |
| AT4G28250 | EXPANSIN B3 (EXPB3)                 | putative beta-e   | 4_14004403                 | 36.97      | proximal promoter           |
| AT4G28260 | na                                  | unknown protei    | 4_14004403                 | 36.97      | promoter                    |
| AT2G42770 | na                                  | Peroxisomal me    | 2_17800346                 | 36.57      | promoter                    |
| AT2G42780 | na                                  | FUNCTIONS IN      | 2_17800346                 | 36.57      | promoter                    |
| AT5G53150 | na                                  | DNAJ heat shoc    | 5_21558048                 | 36.55      | intergenic                  |
| AT5G53160 | REGULATORY COMPONENTS OF ABA I      | Encodes RCAR      | 5_21558048                 | 36.55      | proximal promoter           |
| AT3G14750 | na                                  | unknown protei    | 3_4955876                  | 36.2       | promoter                    |
| AT3G14760 | na                                  | unknown protei    | 3_4955876                  | 36.2       | promoter                    |
| AT2G20560 | na                                  | DNAJ heat shoc    | 2_8852149                  | 36.13      | proximal promoter           |
| AT2G20562 | na                                  | unknown protei    | 2_8852149                  | 36.13      | proximal promoter           |
| AT1G13350 | na                                  | Protein kinase s  | 1_4577996                  | 36.01      | proximal promoter           |
| AT1G13360 | na                                  | unknown protei    | 1_4577996                  | 36.01      | promoter                    |
| AT5G07280 | EXCESS MICROSPOROCTES1 (EMS1)       | Encodes EMS1      | 5_2284874                  | 35.84      | promoter                    |
| AT5G07270 | XB3 ORTHOLOG 3 IN ARABIDOPSIS TH    | XB3 ortholog 3    | 5_2284874                  | 35.84      | intergenic                  |
| AT2G46710 | na                                  | Rho GTPase ac     | 2_19190703                 | 35.49      | proximal promoter           |
| AT5G01090 | na                                  | Concanavalin A    | 5_34473                    | 35.48      | downstream                  |
| AT5G01100 | na                                  | O-fucosyltransf   | 5_34473                    | 35.48      | downstream                  |
| AT3G06070 | na                                  | unknown protei    | 3_1833908                  | 35.34      | proximal promoter           |
| AT3G06080 | na                                  | Encodes a mem     | 3_1833908                  | 35.34      | intergenic                  |
| AT5G47500 | PECTIN METHYLESTERASE 5 (PME5)      | predicted to enc  | 5_19273702                 | 35.32      | proximal promoter           |
| AT5G14150 | na                                  | Protein of unkn   | 5_4564817                  | 35.26      | intergenic                  |
| AT2G40660 | na                                  | Nucleic acid-bin  | 2_16969979                 | 35.21      | intergenic                  |

|           |                                    |                   |            |       |                   |
|-----------|------------------------------------|-------------------|------------|-------|-------------------|
| AT2G40670 | RESPONSE REGULATOR 16 (RR16)       | response regul    | 2_16969979 | 35.21 | promoter          |
| AT1G78070 | na                                 | Transducin/W      | 1_29359345 | 34.82 | intergenic        |
| AT1G68550 | CYTOKININ RESPONSE FACTOR 10 (CF   | encodes a mem     | 1_25730833 | 34.78 | intergenic        |
| AT1G76600 | na                                 | unknown protei    | 1_28745920 | 34.67 | proximal promoter |
| AT5G53880 | na                                 | unknown protei    | 5_21875540 | 34.3  | proximal promoter |
| AT2G45590 | na                                 | Protein kinase s  | 2_18786455 | 34.15 | promoter          |
| AT1G03600 | (PSB27)                            | PSB27; FUNCT      | 1_898361   | 32.86 | proximal promoter |
| AT1G03590 | na                                 | Protein phosph    | 1_898361   | 32.86 | proximal promoter |
| AT1G03610 | na                                 | Protein of unkn   | 1_898361   | 32.86 | proximal promoter |
| AT1G03620 | na                                 | ELMO/CED-12       | 1_898361   | 32.86 | intergenic        |
| AT5G54145 | na                                 | unknown protei    | 5_21969857 | 32.79 | proximal promoter |
| AT4G29020 | na                                 | glycine-rich prot | 4_14304181 | 32.69 | proximal promoter |
| AT5G54530 | na                                 | Protein of unkn   | 5_22151104 | 32.67 | proximal promoter |
| AT1G17420 | LIPOXYGENASE 3 (LOX3)              | LOX3 encode s     | 1_5979424  | 32.6  | intron            |
| AT5G60840 | na                                 | unknown protei    | 5_24476916 | 32.58 | proximal promoter |
| AT5G23280 | na                                 | TCP family tran   | 5_7842204  | 32.45 | proximal promoter |
| AT5G23270 | SUGAR TRANSPORTER 11 (STP11)       | sugar transport   | 5_7842204  | 32.45 | intergenic        |
| AT3G09720 | na                                 | P-loop containi   | 3_2983831  | 32.41 | promoter          |
| AT3G09730 | na                                 | unknown protei    | 3_2983831  | 32.41 | promoter          |
| AT2G24790 | CONSTANS-LIKE 3 (COL3)             | Positive regulat  | 2_10566726 | 32.18 | promoter          |
| AT2G24791 | na                                 | Pseudogene of     | 2_10566726 | 32.18 | intergenic        |
| AT3G06850 | (BCE2)                             | dihydrolipoamid   | 3_2157780  | 32.06 | downstream        |
| AT3G06830 | na                                 | Plant invertase/  | 3_2157780  | 32.06 | intergenic        |
| AT3G06840 | na                                 | unknown protei    | 3_2157780  | 32.06 | three_prime_UTR   |
| AT2G45880 | BETA-AMYLASE 7 (BAM7)              | Encodes a beta    | 2_18882711 | 31.9  | promoter          |
| AT5G07180 | ERECTA-LIKE 2 (ERL2)               | Encodes a rece    | 5_2227599  | 31.76 | three_prime_UTR   |
| AT5G07170 | na                                 | Cell cycle regul  | 5_2227599  | 31.76 | intergenic        |
| AT1G69160 | na                                 | unknown protei    | 1_25999877 | 31.52 | promoter          |
| AT1G58270 | (ZW9)                              | ZW9 mRNA, co      | 1_21614228 | 30.65 | promoter          |
| AT1G58265 | na                                 | Cytochrome P4:    | 1_21614228 | 30.65 | intergenic        |
| AT1G18740 | na                                 | FUNCTIONS IN      | 1_6463675  | 30.37 | promoter          |
| AT1G18745 | na                                 | na                | 1_6463675  | 30.37 | intergenic        |
| AT3G20390 | na                                 | endoribonuclea:   | 3_7111843  | 30.36 | promoter          |
| AT3G20395 | na                                 | RING/U-box su     | 3_7111843  | 30.36 | downstream        |
| AT5G57630 | CBL-INTERACTING PROTEIN KINASE 21  | CBL-interactin    | 5_23343384 | 30.29 | promoter          |
| AT5G57650 | na                                 | eukaryotic trans  | 5_23343384 | 30.29 | intergenic        |
| AT5G57655 | na                                 | xylose isomeras   | 5_23343384 | 30.29 | intergenic        |
| AT5G10890 | na                                 | myosin heavy c    | 5_3435312  | 30.21 | promoter          |
| AT5G10900 | na                                 | Calcineurin-like  | 5_3435312  | 30.21 | intergenic        |
| AT1G78690 | (At1g78690p)                       | Encodes a lys     | 1_29599053 | 30.14 | intergenic        |
| AT1G78700 | BES1/BZR1 HOMOLOG 4 (BEH4)         | BES1/BZR1 hor     | 1_29599053 | 30.14 | promoter          |
| AT1G79630 | na                                 | Protein phosph    | 1_29966371 | 30.12 | proximal promoter |
| AT1G79640 | na                                 | Protein kinase s  | 1_29966371 | 30.12 | intergenic        |
| AT4G25260 | na                                 | Plant invertase/  | 4_12936967 | 30.03 | promoter          |
| AT4G25270 | ORGANELLE TRANSCRIPT PROCESSIN     | Tetratricopeptid  | 4_12936967 | 30.03 | intergenic        |
| AT3G14070 | CATION EXCHANGER 9 (CAX9)          | Involved in cati  | 3_4660914  | 30.01 | downstream        |
| AT3G14060 | na                                 | unknown protei    | 3_4660914  | 30.01 | intergenic        |
| AT3G14067 | na                                 | Subtilase family  | 3_4660914  | 30.01 | promoter          |
| AT1G69890 | na                                 | CONTAINS Inte     | 1_26325083 | 30    | promoter          |
| AT1G69900 | na                                 | Actin cross-linki | 1_26325083 | 30    | intergenic        |
| AT3G12920 | BOI-RELATED GENE 3 (BRG3)          | Encodes one of    | 3_4119586  | 29.62 | intergenic        |
| AT3G12930 | na                                 | Lojap-related pr  | 3_4119586  | 29.62 | intergenic        |
| AT2G21340 | na                                 | MATE efflux fan   | 2_9132537  | 29.51 | promoter          |
| AT5G46750 | ARF-GAP DOMAIN 9 (AGD9)            | A member of AF    | 5_18972545 | 29.46 | proximal promoter |
| AT1G64670 | BODYGUARD1 (BDG1)                  | Encodes a epid    | 1_24033544 | 29.34 | five_prime_UTR    |
| AT1G64680 | na                                 | unknown protei    | 1_24033544 | 29.34 | proximal promoter |
| AT1G21010 | na                                 | unknown protei    | 1_7348694  | 29.15 | intergenic        |
| AT1G12420 | ACT DOMAIN REPEAT 8 (ACR8)         | ACT domain rep    | 1_4230143  | 28.97 | proximal promoter |
| AT1G12423 | na                                 | unknown protei    | 1_4230143  | 28.97 | intergenic        |
| AT3G49220 | na                                 | Plant invertase/  | 3_18252453 | 28.96 | intron            |
| AT3G49670 | BARELY ANY MERISTEM 2 (BAM2)       | Encodes a CLA     | 3_18421572 | 28.88 | intergenic        |
| AT3G49680 | BRANCHED-CHAIN AMINOTRANSFERA      | Encodes a chl     | 3_18421572 | 28.88 | proximal promoter |
| AT4G26700 | FIMBRIN 1 (FIM1)                   | fimbrin-like prot | 4_13463191 | 28.84 | intron            |
| AT5G42030 | ABL INTERACTOR-LIKE PROTEIN 4 (ABI | ABL interactor-l  | 5_16813659 | 28.82 | promoter          |
| AT5G42050 | na                                 | DCD (Developn     | 5_16813659 | 28.82 | proximal promoter |
| AT5G42053 | na                                 | This gene enc     | 5_16813659 | 28.82 | intergenic        |
| AT5G42060 | na                                 | DEK, chromatin    | 5_16813659 | 28.82 | intergenic        |
| AT5G42040 | REGULATORY PARTICLE NON-ATPASE     | regulatory partic | 5_16813659 | 28.82 | downstream        |
| AT3G44610 | na                                 | Protein kinase s  | 3_16187049 | 28.76 | intergenic        |
| AT4G39400 | BRASSINOSTEROID INSENSITIVE 1 (BR  | Encodes a plasi   | 4_18328810 | 28.59 | three_prime_UTR   |
| AT4G39404 | na                                 | other RNA         | 4_18328810 | 28.59 | intergenic        |
| AT4G39403 | POLARIS (PLS)                      | Encodes a 36 a    | 4_18328810 | 28.59 | intergenic        |
| AT5G62370 | na                                 | Tetratricopeptid  | 5_25046469 | 28.5  | proximal promoter |
| AT5G53220 | na                                 | unknown protei    | 5_21593782 | 28.37 | proximal promoter |
| AT1G79110 | BOI-RELATED GENE 2 (BRG2)          | Encodes one of    | 1_29756891 | 28.34 | proximal promoter |
| AT3G15210 | ETHYLENE RESPONSIVE ELEMENT BIN    | Encodes a mem     | 3_5125515  | 27.91 | intergenic        |
| AT3G15200 | na                                 | Tetratricopeptid  | 3_5125515  | 27.91 | intergenic        |
| AT3G58850 | PHY RAPIDLY REGULATED 2 (PAR2)     | Encodes PHYTI     | 3_21761400 | 27.75 | proximal promoter |
| AT5G59730 | EXOCYST SUBUNIT EXO70 FAMILY PRC   | A member of E     | 5_24064167 | 27.61 | exon              |
| AT5G59732 | na                                 | Potential natura  | 5_24064167 | 27.61 | promoter          |
| AT2G41930 | na                                 | Protein kinase s  | 2_17510289 | 27.61 | intergenic        |
| AT2G41945 | na                                 | unknown protei    | 2_17510289 | 27.61 | intron            |
| AT2G41940 | ZINC FINGER PROTEIN 8 (ZFP8)       | Encodes a zinc    | 2_17510289 | 27.61 | intergenic        |
| AT3G22886 | MICRORNA167A (MIR167A)             | Encodes a micr    | 3_8107804  | 27.54 | promoter          |
| AT4G01245 | na                                 | FUNCTIONS IN      | 4_526517   | 27.54 | proximal promoter |
| AT1G21065 | na                                 | unknown protei    | 1_7375328  | 27.52 | exon              |
| AT1G21070 | na                                 | Nucleotide-suq    | 1_7375328  | 27.52 | intergenic        |
| AT1G21060 | na                                 | Protein of unkn   | 1_7375328  | 27.52 | intergenic        |
| AT1G74960 | FATTY ACID BIOSYNTHESIS 1 (FAB1)   | Encodes a plasi   | 1_28156977 | 27.51 | proximal promoter |
| AT1G13930 | na                                 | Involved in resp  | 1_4760436  | 27.49 | proximal promoter |
| AT1G13940 | na                                 | Plant protein of  | 1_4760436  | 27.49 | intergenic        |
| AT4G30240 | na                                 | Syntaxin/t-SNAI   | 4_14807480 | 27.44 | intergenic        |
| AT4G30230 | na                                 | unknown protei    | 4_14807480 | 27.44 | downstream        |
| AT1G48742 | MICRORNA157D (MIR157D)             | Encodes a micr    | 1_18028008 | 27.32 | proximal promoter |

|           |                                         |                              |       |                   |
|-----------|-----------------------------------------|------------------------------|-------|-------------------|
| AT1G12110 | NITRATE TRANSPORTER 1.1 (NRT1.1)        | Encodes NRT1.1_1_4107982     | 27.09 | intron            |
| AT1G26600 | CLAVATA3/ESR-RELATED 9 (CLE9)           | Member of a lar 1_9191493    | 26.95 | promoter          |
| AT3G57530 | CALCIUM-DEPENDENT PROTEIN KINASE        | Calcium-depend 3_21295466    | 26.7  | intergenic        |
| AT2G22330 | CYTOCHROME P450, FAMILY 79, SUBF        | Encodes a cyto 2_9487406     | 26.7  | proximal promoter |
| AT3G53390 | na                                      | Transducin/WD 3_19791471     | 26.69 | proximal promoter |
| AT3G53380 | na                                      | Concanavalin A 3_19791471    | 26.69 | promoter          |
| AT5G67180 | TARGET OF EARLY ACTIVATION TAGG1        | target of early a 5_26806490 | 26.66 | proximal promoter |
| AT1G09470 | na                                      | unknown protei 1_3057087     | 26.58 | intron            |
| AT5G11550 | na                                      | ARM repeat sur 5_3708156     | 26.58 | three_prime_UTR   |
| AT5G11560 | na                                      | catalytic; FUN 5_3708156     | 26.58 | intergenic        |
| AT5G62230 | ERECTA-LIKE 1 (ERL1)                    | Encodes a rece 5_24995786    | 26.57 | promoter          |
| AT1G75080 | BRASSINAZOLE-RESISTANT 1 (BZR1)         | Encodes a posi 1_28183994    | 26.54 | proximal promoter |
| AT1G75060 | na                                      | unknown protei 1_28183994    | 26.54 | promoter          |
| AT1G75070 | na                                      | pre-tRNA; tRNA 1_28183994    | 26.54 | proximal promoter |
| AT1G24405 | na                                      | unknown protei 1_8654674     | 26.51 | proximal promoter |
| AT3G17120 | na                                      | unknown protei 3_5843850     | 26.4  | intergenic        |
| AT3G18080 | B-S GLUCOSIDASE 44 (BGLU44)             | B-S glucosidase 3_6190670    | 26.21 | proximal promoter |
| AT1G66400 | CALMODULIN LIKE 23 (CML23)              | Encodes a calm 1_24770551    | 26.11 | downstream        |
| AT1G24265 | na                                      | Protein of unkn 1_8598686    | 26.02 | proximal promoter |
| AT3G16860 | COBRA-LIKE PROTEIN 8 PRECURSOR          | COBRA-like prc 3_5763492     | 25.87 | proximal promoter |
| AT3G16870 | GATA TRANSCRIPTION FACTOR 17 (GATA17)   | Encodes a merr 3_5763492     | 25.87 | downstream        |
| AT5G65280 | GCR2-LIKE 1 (GCL1)                      | Encodes a prote 5_26088953   | 25.74 | proximal promoter |
| AT5G60680 | na                                      | Protein of unkn 5_24384407   | 25.72 | proximal promoter |
| AT1G64390 | GLYCOSYL HYDROLASE 9C2 (GH9C2)          | glycosyl hydrola 1_23912783  | 25.71 | intron            |
| AT4G28770 | na                                      | Tetraspanin farr 4_14213922  | 25.66 | intron            |
| AT3G47295 | na                                      | unknown protei 3_17427907    | 25.65 | promoter          |
| AT3G29105 | na                                      | pseudogene, nc 3_11081140    | 25.65 | intron            |
| AT3G47300 | SELT-LIKE PROTEIN PRECURSOR (SELT)      | SELT-like protei 3_17427907  | 25.65 | intergenic        |
| AT3G12965 | na                                      | Unknown gene 3_4138372       | 25.59 | proximal promoter |
| AT3G28070 | na                                      | nodulin MIN21-1 3_10449152   | 25.58 | intron            |
| AT1G32690 | na                                      | unknown protei 1_11821872    | 25.28 | promoter          |
| AT1G70090 | GLUCOSYL TRANSFERASE FAMILY 8 (LGT8)    | Encodes a prote 1_26400580   | 25.24 | promoter          |
| AT1G70100 | na                                      | unknown protei 1_26400580    | 25.24 | proximal promoter |
| AT5G07300 | BONZAI 2 (BON2)                         | Encodes a copii 5_2299751    | 25.23 | promoter          |
| AT5G07290 | MEI2-LIKE 4 (ML4)                       | AML4 A membe 5_2299751       | 25.23 | intergenic        |
| AT1G05240 | na                                      | Peroxidase sup 1_1520063     | 25.05 | proximal promoter |
| AT3G21700 | (SGP2)                                  | Monomeric G pi 3_7642912     | 25.02 | proximal promoter |
| AT3G21690 | na                                      | MATE efflux fan 3_7642912    | 25.02 | intergenic        |
| AT1G68560 | ALPHA-XYLOSIDASE 1 (XYL1)               | Encodes a bifur 1_25741117   | 24.93 | intergenic        |
| AT4G03010 | na                                      | RNI-like super 4_1329430     | 24.91 | proximal promoter |
| AT4G03020 | na                                      | transducin famil 4_1329430   | 24.91 | intergenic        |
| AT1G73750 | na                                      | Uncharacterise 1_27739100    | 24.87 | downstream        |
| AT1G73760 | na                                      | RING/U-box suj 1_27739100    | 24.87 | downstream        |
| AT2G01850 | ENDOXYLOGLUCAN TRANSFERASE A3           | EXGT-A3 has h 2_383635       | 24.7  | proximal promoter |
| AT1G78250 | na                                      | pre-tRNA; tRNA 1_29443582    | 24.67 | intergenic        |
| AT4G23750 | CYTOKININ RESPONSE FACTOR 2 (CRF2)      | encodes a mem 4_12379801     | 24.62 | intergenic        |
| AT4G23760 | na                                      | Cox19-like CHC 4_12379801    | 24.62 | proximal promoter |
| AT2G18876 | na                                      | Afadin/alpha-ac 2_8169433    | 24.61 | promoter          |
| AT5G16350 | na                                      | O-acyltransfera 5_5352399    | 24.57 | promoter          |
| AT2G02450 | LONG VEGETATIVE PHASE 1 (LOV1)          | NAC domain co 2_649194       | 24.55 | intron            |
| AT5G03040 | IQ-DOMAIN 2 (iqd2)                      | IQ-domain 2 (iqi 5_712802    | 24.49 | intron            |
| AT1G73150 | GLOBAL TRANSCRIPTION FACTOR GR1         | Bromodomain a 1_27506247     | 24.09 | promoter          |
| AT3G47620 | TEOSINTE BRANCHED, CYCLOIDEA AN         | Encodes a trans 3_17558100   | 24.06 | proximal promoter |
| AT4G18020 | (APRR2)                                 | Encodes pseud 4_10003514     | 23.98 | three_prime_UTR   |
| AT3G10720 | na                                      | Plant invertase/ 3_3356218   | 23.85 | intron            |
| AT1G19570 | DEHYDROASCORBATE REDUCTASE (DHA)        | Encodes a merr 1_6774597     | 23.84 | promoter          |
| AT1G19580 | GAMMA CARBONIC ANHYDRASE 1 (GCA)        | Encodes mitoch 1_6774597     | 23.84 | promoter          |
| AT4G38860 | na                                      | SAUR-like auxi 4_18125804    | 23.8  | intergenic        |
| AT4G38840 | na                                      | SAUR-like auxi 4_18125804    | 23.8  | promoter          |
| AT4G38850 | SMALL AUXIN UPREGULATED 15 (SAUR15)     | mRNA is rapidl 4_18125804    | 23.8  | promoter          |
| AT3G22104 | na                                      | Phototropic-res 3_7790107    | 23.71 | intron            |
| AT5G10960 | na                                      | Polynucleotidyl 5_3464049    | 23.64 | promoter          |
| AT1G18710 | MYB DOMAIN PROTEIN 47 (MYB47)           | Member of the f 1_6446303    | 23.61 | intergenic        |
| AT3G55290 | na                                      | NAD(P)-binding 3_20501880    | 23.6  | proximal promoter |
| AT3G55280 | RIBOSOMAL PROTEIN L23AB (RPL23AB)       | 60S ribosomal r 3_20501880   | 23.6  | downstream        |
| AT4G12270 | na                                      | Copper amine c 4_7298840     | 23.57 | exon              |
| AT5G65130 | na                                      | encodes a mem 5_26018834     | 23.57 | intergenic        |
| AT2G42880 | MAP KINASE 20 (MPK20)                   | member of MAF 2_17836466     | 23.48 | intergenic        |
| AT5G21940 | na                                      | unknown protei 5_7252106     | 23.48 | proximal promoter |
| AT5G21930 | P-TYPE ATPASE OF ARABIDOPSIS 2 (P-ATP2) | P-Type ATPase 5_7252106      | 23.48 | intergenic        |
| AT2G42870 | PHY RAPIDLY REGULATED 1 (PAR1)          | Encodes PHYTI 2_17836466     | 23.48 | three_prime_UTR   |
| AT3G06500 | ALKALINE/NEUTRAL INVERTASE C (A/NIC)    | Plant neutral inv 3_2011631  | 23.46 | promoter          |
| AT3G48790 | na                                      | Pyridoxal phosph 3_18092380  | 23.38 | proximal promoter |
| AT3G48780 | SERINE PALMITOYLTRANSFERASE 1 (SPT1)    | Encodes one of 3_18092380    | 23.38 | three_prime_UTR   |
| AT4G03270 | CYCLIN D6;1 (CYCD6;1)                   | Cyclin D6;1 (CY 4_1431871    | 23.35 | intergenic        |
| AT5G08139 | na                                      | RING/U-box suj 5_2614836     | 23.35 | proximal promoter |
| AT4G03260 | na                                      | Outer arm dyne 4_1431871     | 23.35 | downstream        |
| AT3G25760 | ALLENE OXIDE CYCLASE 1 (AOC1)           | encodes allene 3_9403681     | 23.26 | promoter          |
| AT2G42380 | (BZIP34)                                | Encodes a merr 2_17646264    | 23.25 | intergenic        |
| AT2G42365 | na                                      | Potential natura 2_17646264  | 23.25 | promoter          |
| AT2G42370 | na                                      | unknown protei 2_17646264    | 23.25 | intergenic        |
| AT1G53050 | na                                      | Protein kinase s 1_19776858  | 23.18 | intergenic        |
| AT1G53060 | na                                      | Legume lectin fr 1_19776858  | 23.18 | downstream        |
| AT1G19610 | (PDF1.4)                                | Predicted to enc 1_6782771   | 23.1  | proximal promoter |
| AT2G28910 | CAX INTERACTING PROTEIN 4 (CXIP4)       | Encodes a CAX 2_12418352     | 23.1  | proximal promoter |
| AT2G28920 | na                                      | RING/U-box suj 2_12418352    | 23.1  | exon              |
| AT3G61540 | na                                      | alpha/beta-Hydr 3_22776282   | 22.99 | intergenic        |
| AT3G61545 | na                                      | pre-tRNA; tRNA 3_22776282    | 22.99 | intergenic        |
| AT3G61550 | na                                      | RING/U-box suj 3_22776282    | 22.99 | promoter          |
| AT3G61560 | na                                      | Reticulon family 3_22776282  | 22.99 | proximal promoter |
| AT1G21590 | na                                      | Protein kinase r 1_7570992   | 22.85 | proximal promoter |
| AT1G21600 | PLASTID TRANSCRIPTIONALLY ACTIVE        | Present in trans 1_7570992   | 22.85 | intron            |
| AT2G19180 | na                                      | unknown protei 2_8324018     | 22.8  | proximal promoter |
| AT3G47790 | ATP-BINDING CASSETTE A8 (ABCA8)         | member of ATH 3_17634472     | 22.78 | intergenic        |

|           |                                                        |                  |               |       |                   |
|-----------|--------------------------------------------------------|------------------|---------------|-------|-------------------|
| AT5G11530 | EMBRYONIC FLOWER 1 (EMF1)                              | Involved in regu | 5_3695219     | 22.78 | proximal promoter |
| AT3G47800 | na                                                     | Galactose muta   | 3_17634472    | 22.78 | promoter          |
| AT1G02180 | na                                                     | ferredoxin-relat | 1_414826      | 22.75 | promoter          |
| AT1G02190 | na                                                     | Fatty acid hydr  | 1_414826      | 22.75 | promoter          |
| AT5G40340 | na                                                     | Tudor/PWWP/N     | 5_16135294    | 22.72 | promoter          |
| AT1G70530 | CYSTEINE-RICH RLK (RECEPTOR-LIKE)                      | Encodes a cyst   | 1_26592801    | 22.66 | proximal promoter |
| AT1G70540 | EMBRYO SAC DEVELOPMENT ARREST                          | embryo sac dev   | 1_26592801    | 22.66 | proximal promoter |
| AT1G27300 | na                                                     | unknown protei   | 1_9481305     | 22.56 | proximal promoter |
| AT1G27285 | na                                                     | transposable el  | 1_9481305     | 22.56 | intergenic        |
| AT1G27290 | na                                                     | unknown protei   | 1_9481305     | 22.56 | promoter          |
| AT3G14050 | RELA/SPOT HOMOLOG 2 (RSH2)                             | RELA/SPOT ho     | 3_4655852     | 22.52 | proximal promoter |
| AT5G45480 | na                                                     | Protein of unkn  | 5_18429840    | 22.5  | proximal promoter |
| AT5G45490 | na                                                     | P-loop contain   | 5_18429840    | 22.5  | intron            |
| AT2G34160 | na                                                     | Alba DNA/RNA-    | 2_14427646    | 22.48 | intergenic        |
| AT5G47370 | (HAT2)                                                 | homeobox-leuci   | 5_19218876    | 22.44 | proximal promoter |
| AT2G36040 | na                                                     | transposable el  | 2_15132084    | 22.4  | proximal promoter |
| AT1G35610 | na                                                     | Cysteine/Histid  | 1_13140441    | 22.38 | intergenic        |
| AT5G62000 | AUXIN RESPONSE FACTOR 2 (ARF2)                         | Encodes an aux   | 5_24906273    | 22.35 | intergenic        |
| AT5G61997 | na                                                     | This gene encod  | 5_24906273    | 22.35 | intergenic        |
| AT1G56220 | na                                                     | Dormancy/auxin   | 1_21043145    | 22.28 | promoter          |
| AT4G03400 | DWARF IN LIGHT 2 (DFL2)                                | Encodes a GH3    | 4_1500047     | 22.27 | promoter          |
| AT5G41810 | na                                                     | unknown protei   | 5_16739911    | 22.27 | intergenic        |
| AT5G41820 | RAB GERANYLGERANYL TRANSFERAS                          | RAB geranylger   | 5_16739911    | 22.27 | proximal promoter |
| AT2G36480 | na                                                     | ENTH/VHS fam     | 2_15302469    | 22.21 | downstream        |
| AT2G36470 | na                                                     | Plant protein of | 2_15302469    | 22.21 | proximal promoter |
| AT3G52450 | PLANT U-BOX 22 (PUB22)                                 | Encodes a cyto   | 3_19440701    | 22.21 | downstream        |
| AT3G05320 | na                                                     | O-fucosyltransf  | 3_1516562     | 21.94 | proximal promoter |
| AT3G05327 | na                                                     | Cyclin family pr | 3_1516562     | 21.94 | intergenic        |
| AT2G25460 | na                                                     | CONTAINS Inte    | 2_10836245    | 21.91 | proximal promoter |
| AT1G75820 | CLAVATA 1 (CLV1)                                       | Putative recept  | 1_28467556    | 21.88 | proximal promoter |
| AT1G74930 | (ORA47)                                                | encodes a mem    | 1_28143985    | 21.84 | promoter          |
| AT3G24050 | GATA TRANSCRIPTION FACTOR 1 (GAT1)                     | Encodes a mem    | 3_8686527     | 21.84 | intron            |
| AT1G74929 | na                                                     | unknown protei   | 1_28143985    | 21.84 | downstream        |
| AT1G74940 | na                                                     | Protein of unkn  | 1_28143985    | 21.84 | proximal promoter |
| AT5G52120 | PHLOEM PROTEIN 2-A14 (PP2-A14)                         | phloem protein   | : 5_21181724  | 21.84 | proximal promoter |
| AT5G41310 | na                                                     | P-loop nucleos   | 5_16524524    | 21.83 | proximal promoter |
| AT1G29630 | na                                                     | 5'-3' exonuclea  | 1_10353971    | 21.73 | intergenic        |
| AT1G29640 | na                                                     | Protein of unkn  | 1_10353971    | 21.73 | intergenic        |
| AT5G13730 | SIGMA FACTOR 4 (SIG4)                                  | Encodes sigma    | 5_4431199     | 21.66 | promoter          |
| AT5G13740 | ZINC INDUCED FACILITATOR 1 (ZIF1)                      | Encodes ZIF1     | ( 5_4431199   | 21.66 | proximal promoter |
| AT4G23870 | na                                                     | unknown protei   | 4_12412268    | 21.5  | proximal promoter |
| AT2G46520 | na                                                     | cellular apopto  | 2_19095855    | 21.47 | proximal promoter |
| AT1G64405 | na                                                     | unknown protei   | 1_23923232    | 21.43 | promoter          |
| AT1G64710 | na                                                     | GroES-like zinc  | 1_24043554    | 21.42 | proximal promoter |
| AT4G30180 | na                                                     | sequence-speci   | 4_14768433    | 21.42 | proximal promoter |
| AT1G68500 | na                                                     | unknown protei   | 1_25703222    | 21.4  | intergenic        |
| AT5G13240 | na                                                     | transcription re | 5_4227823     | 21.39 | promoter          |
| AT3G20320 | ATP-BINDING CASSETTE 115 (ABC115)                      | Encodes a perr   | 3_7087431     | 21.38 | downstream        |
| AT3G20310 | ETHYLENE RESPONSE FACTOR 7 (ERF7)                      | Encodes a mem    | 3_7087431     | 21.38 | proximal promoter |
| AT2G39865 | na                                                     | unknown protei   | 2_16642545    | 21.36 | proximal promoter |
| AT2G39870 | na                                                     | unknown protei   | 2_16642545    | 21.36 | proximal promoter |
| AT5G04770 | CATIONIC AMINO ACID TRANSPORTER                        | Encodes a mem    | 5_1380833     | 21.35 | intron            |
| AT5G04780 | na                                                     | Pentatricopept   | 5_1380833     | 21.35 | intergenic        |
| AT3G15350 | na                                                     | Core-2/1-branch  | 3_5165439     | 21.31 | proximal promoter |
| AT1G08210 | na                                                     | Eukaryotic aspa  | 1_2576798     | 21.26 | downstream        |
| AT1G08200 | UDP-D-APIOSE/UDP-D-XYLOSE SYNTH                        | Encodes a puta   | 1_2576798     | 21.26 | promoter          |
| AT5G59730 | EXOCYST SUBUNIT EXO70 FAMILY PRC A                     | member of E)     | 5_24067841    | 21.25 | proximal promoter |
| AT4G17250 | na                                                     | unknown protei   | 4_9669192     | 21.23 | proximal promoter |
| AT4G17240 | na                                                     | unknown protei   | 4_9669192     | 21.23 | proximal promoter |
| AT4G17245 | na                                                     | RING/U-box su    | 4_9669192     | 21.23 | promoter          |
| AT5G03370 | na                                                     | acylphosphatas   | 5_828817      | 21.19 | proximal promoter |
| AT3G06740 | GATA TRANSCRIPTION FACTOR 15 (GAT15)                   | Encodes a mem    | 3_2127785     | 21.17 | intergenic        |
| AT5G45800 | MATERNAL EFFECT EMBRYO ARREST                          | maternal effect  | : 5_18577116  | 21.17 | intron            |
| AT3G06750 | na                                                     | hydroxyproline-  | 3_2127785     | 21.17 | intergenic        |
| AT3G06760 | na                                                     | Drought-respon   | 3_2127785     | 21.17 | intergenic        |
| AT3G44610 | na                                                     | Protein kinase   | s 3_16190467  | 21.15 | intron            |
| AT1G52855 | na                                                     | unknown protei   | 1_19684013    | 21.08 | proximal promoter |
| AT1G52860 | na                                                     | pre-tRNA; tRNA   | 1_19684013    | 21.08 | intergenic        |
| AT1G52870 | na                                                     | Peroxisomal me   | 1_19684013    | 21.08 | proximal promoter |
| AT3G50620 | na                                                     | P-loop contain   | 3_18784581    | 21.05 | downstream        |
| AT1G12430 | ARMADILLO REPEAT KINESIN 3 (ARK3)                      | Encodes the kir  | 1_4238860     | 21.04 | promoter          |
| AT4G35930 | F-BOX STRESS INDUCED 4 (FBS4)                          | F-box family pr  | 4_17018281    | 21.02 | proximal promoter |
| AT4G00810 | na                                                     | 60S acidic ribo  | s 4_347448    | 21    | promoter          |
| AT4G38900 | na                                                     | Basic-leucine    | zi 4_18142087 | 20.99 | promoter          |
| AT4G03205 | (hemf2)                                                | hemf2; FUNCTI    | 4_1415642     | 20.96 | intergenic        |
| AT4G03210 | XYLOGLUCAN ENDOTRANSGLUCOSYL                           | encodes a mem    | 4_1415642     | 20.96 | promoter          |
| AT3G46100 | HISTIDYL-TRNA SYNTHETASE 1 (HRS1)                      | histidyl-tRNA    | sy 3_16933212 | 20.93 | proximal promoter |
| AT3G46110 | na                                                     | LOCATED IN:      | p 3_16933212  | 20.93 | exon              |
| AT1G32920 | na                                                     | unknown protei   | 1_11927935    | 20.9  | proximal promoter |
| AT1G68670 | na                                                     | myb-like transcr | 1_25781274    | 20.73 | proximal promoter |
| AT1G20490 | na                                                     | AMP-dependen     | 1_7099928     | 20.71 | promoter          |
| AT5G57660 | CONSTANS-LIKE 5 (COL5)                                 | CONSTANS-like    | 5_23359534    | 20.68 | intergenic        |
| AT5G25210 | na                                                     | unknown protei   | 5_8725017     | 20.67 | intron            |
| AT2G45685 | na                                                     | Potential natura | 2_18820553    | 20.61 | promoter          |
| AT5G47640 | NUCLEAR FACTOR Y, SUBUNIT B2 (NF-YB2)                  | nuclear factor   | Y 5_19308797  | 20.61 | promoter          |
| AT2G45690 | SHRUNKEN SEED 1 (SSE1)                                 | Encodes a prote  | 2_18820553    | 20.61 | intergenic        |
| AT2G45680 | TCP DOMAIN PROTEIN 9 (TCP9)                            | TCP family tran  | 2_18820553    | 20.61 | three_prime_UTR   |
| AT3G06120 | MUTE (MUTE)                                            | Encodes a basi   | 3_1846311     | 20.6  | promoter          |
| AT4G35837 | na                                                     | This gene encod  | 4_16983241    | 20.6  | proximal promoter |
| AT4G35840 | na                                                     | RING/U-box su    | 4_16983241    | 20.6  | intergenic        |
| AT4G35850 | na                                                     | Pentatricopept   | 4_16983241    | 20.6  | promoter          |
| AT3G17998 | CONSERVED PEPTIDE UPSTREAM OPEN READING FRAME 1 (CUP1) | Upstream open    | 3_6158600     | 20.59 | intergenic        |
| AT3G18000 | XIPOTL 1 (XPL1)                                        | Arabidopsis thal | 3_6158600     | 20.59 | intergenic        |
| AT2G43330 | INOSITOL TRANSPORTER 1 (INT1)                          | Encodes a tono   | 2_18005027    | 20.58 | intergenic        |

|           |                                   |                              |       |                   |
|-----------|-----------------------------------|------------------------------|-------|-------------------|
| AT2G43340 | na                                | Protein of unknct_2_18005027 | 20.58 | proximal promoter |
| AT3G54400 | na                                | Eukaryotic aspa_3_20143201   | 20.57 | proximal promoter |
| AT3G52190 | PHOSPHATE TRANSPORTER TRAFFIC     | Encodes a plan_3_19353669    | 20.54 | intergenic        |
| AT3G52180 | STARCH-EXCESS 4 (SEX4)            | Encodes a plan_3_19353669    | 20.54 | promoter          |
| AT2G45400 | (BEN1)                            | involved in the r_2_18706339 | 20.51 | promoter          |
| AT3G14205 | na                                | Phosphoinositid_3_4723879    | 20.5  | proximal promoter |
| AT1G62430 | CDP-DIACYLGLYCEROL SYNTHASE 1 (   | Encodes a CDF_1_23105385     | 20.48 | intergenic        |
| AT3G17860 | JASMONATE-ZIM-DOMAIN PROTEIN 3 (  | JAZs are direct_3_6119584    | 20.48 | promoter          |
| AT1G62420 | na                                | Protein of unknct_1_23105385 | 20.48 | proximal promoter |
| AT3G19590 | BUB (BUDDING UNINHIBITED BY BENZ) | Encodes a prot_3_6804799     | 20.41 | proximal promoter |
| AT3G19580 | ZINC-FINGER PROTEIN 2 (ZF2)       | Encodes zinc fir_3_6804799   | 20.41 | proximal promoter |
| AT1G29395 | COLD REGULATED 314 INNER MEMBR/   | Integral membr_1_10289670    | 20.31 | promoter          |
| AT1G29400 | MEI2-LIKE PROTEIN 5 (ML5)         | A member of mr_1_10289670    | 20.31 | intergenic        |
| AT5G39860 | PACLOBUTRAZOL RESISTANCE1 (PRE    | Encodes PRE1_5_15957350      | 20.3  | promoter          |
| AT5G26270 | na                                | unknown proteir_5_9208290    | 20.2  | downstream        |
| AT5G26280 | na                                | TRAF-like famil_5_9208290    | 20.2  | promoter          |
| AT3G49900 | na                                | Phototropic-res_3_18502818   | 20.2  | promoter          |
| AT5G04830 | na                                | Nuclear transp_5_1401433     | 20.15 | intergenic        |
| AT5G04820 | OVATE FAMILY PROTEIN 13 (OPF13)   | ovate family pro_5_1401433   | 20.15 | intergenic        |
| AT5G19690 | STAUROSPORIN AND TEMPERATURE      | Encodes an olig_5_6652512    | 20.15 | promoter          |
| AT5G51560 | na                                | Leucine-rich ref_5_20943443  | 20.12 | proximal promoter |
| AT5G07580 | na                                | encodes a mem_5_2399460      | 20.09 | promoter          |
| AT1G13950 | EUKARYOTIC ELONGATION FACTOR 5/   | Encodes eukary_1_4772861     | 20.08 | proximal promoter |
| AT5G11740 | ARABINOGALACTAN PROTEIN 15 (AGP   | Encodes arabin_5_3784012     | 20.05 | promoter          |
| AT1G15570 | CYCLIN A2;3 (CYCA2;3)             | A2-type cyclin_1_5360627     | 20.05 | proximal promoter |
| AT2G46420 | na                                | Plant protein_15_2_19052291  | 20.04 | proximal promoter |
| AT1G33590 | na                                | Leucine-rich ref_1_12177655  | 19.96 | promoter          |
| AT1G33600 | na                                | Leucine-rich ref_1_12177655  | 19.96 | intergenic        |
| AT1G55330 | ARABINOGALACTAN PROTEIN 21 (AGP   | Encodes a puta_1_20648208    | 19.88 | intergenic        |
| AT1G55325 | GRAND CENTRAL (GCT)               | Encodes the Ar_1_20648208    | 19.88 | intron            |
| AT5G53510 | OLIGOPEPTIDE TRANSPORTER 9 (OPT   | oligopeptide trai_5_21737353 | 19.86 | proximal promoter |
| AT1G76380 | na                                | DNA-binding br_1_28654702    | 19.81 | promoter          |
| AT5G16567 | na                                | This gene encod_5_5420057    | 19.78 | intergenic        |
| AT4G27450 | na                                | Aluminium induc_4_13729297   | 19.74 | promoter          |
| AT5G05410 | DRE-BINDING PROTEIN 2A (DREB2A)   | Encodes a trans_5_1601439    | 19.73 | proximal promoter |
| AT5G05420 | na                                | FKBP-like pepti_5_1601439    | 19.73 | intergenic        |
| AT2G23760 | BEL1-LIKE HOMEODOMAIN 4 (BLH4)    | Encodes a mem_2_10115649     | 19.72 | proximal promoter |
| AT1G05630 | INOSITOL-POLYPHOSPHATE 5-PHOSPH   | Encodes an ino_1_1681776     | 19.69 | proximal promoter |
| AT5G61970 | na                                | signal recogniti_5_24887160  | 19.69 | proximal promoter |
| AT1G05620 | URIDINE-RIBOHYDROLASE 2 (URH2)    | Encodes a cyto_1_1681776     | 19.69 | downstream        |
| AT2G36026 | na                                | Ovate family prc_2_15128095  | 19.66 | intergenic        |
| AT2G36030 | na                                | unknown proteir_2_15128095   | 19.66 | promoter          |
| AT1G63850 | na                                | BTB/POZ doma_1_23696775      | 19.64 | promoter          |
| AT4G01060 | CAPRICE-LIKE MYB3 (CPL3)          | Encodes a Myb_4_460274       | 19.52 | promoter          |
| AT3G63440 | CYTOKININ OXIDASE/DEHYDROGENAS    | This gene used_3_23426945    | 19.44 | intergenic        |
| AT3G63445 | na                                | Potential natura_3_23426945  | 19.44 | proximal promoter |
| AT3G63450 | na                                | RNA-binding (R_3_23426945    | 19.44 | three_prime_UTR   |
| AT3G12200 | NIMA-RELATED KINASE 7 (Nek7)      | Encodes AtNek_3_3888544      | 19.42 | exon              |
| AT4G19170 | NINE-CIS-EPOXYCAROTENOID DIOXYG   | chloroplast-targ_4_10484438  | 19.41 | intergenic        |
| AT1G20823 | na                                | RING/U-box su_1_7239307      | 19.33 | exon              |
| AT3G46450 | na                                | SEC14 cytosoli_3_17095708    | 19.33 | promoter          |
| AT3G46460 | UBIQUITIN-CONJUGATING ENZYME 13   | ubiquitin-conjug_3_17095708  | 19.33 | downstream        |
| AT1G16370 | ORGANIC CATION/CARNITINE TRANSP   | organic cation/c_1_5596553   | 19.3  | promoter          |
| AT3G13450 | DARK INDUCIBLE 4 (DIN4)           | branched chain_3_4384489     | 19.29 | promoter          |
| AT3G13460 | EVOLUTIONARILY CONSERVED C-TERM   | Physically inter_3_4384489   | 19.29 | downstream        |
| AT1G16500 | na                                | unknown proteir_1_5638356    | 19.25 | proximal promoter |
| AT2G26100 | na                                | Galactosyltrans_2_11118357   | 19.2  | promoter          |
| AT1G07890 | ASCORBATE PEROXIDASE 1 (APX1)     | Encodes a cyto_1_2437107     | 19.19 | promoter          |
| AT1G07885 | na                                | unknown proteir_1_2437107    | 19.19 | promoter          |
| AT5G02580 | na                                | Plant protein_15_5_579254    | 19.18 | proximal promoter |
| AT3G13750 | BETA GALACTOSIDASE 1 (BGAL1)      | beta-galactosid_3_4510402    | 19.17 | proximal promoter |
| AT1G70210 | CYCLIN D1;1 (CYCD1;1)             | Encodes a D-ty_1_26442410    | 19.17 | three_prime_UTR   |
| AT1G18670 | IMPAIRED IN BABA-INDUCED STERILIT | Encodes a cycli_1_6431532    | 19.13 | proximal promoter |
| AT1G18680 | na                                | HNH endonucle_1_6431532      | 19.13 | intergenic        |
| AT4G00730 | ANTHOCYANINLESS 2 (ANL2)          | Encodes a hom_4_299268       | 19.09 | downstream        |
| AT2G31080 | na                                | transposable elk_2_13231325  | 19.09 | intergenic        |
| AT5G60850 | OBF BINDING PROTEIN 4 (OBP4)      | Encodes a zinc_5_24482527    | 19.09 | intergenic        |
| AT5G60860 | RAB GTPASE HOMOLOG A1F (RABA1f)   | RAB GTPase ho_5_24482527     | 19.09 | proximal promoter |
| AT4G00720 | SHAGGY-LIKE PROTEIN KINASE 32 (SK | Encodes ASKth_4_299268       | 19.09 | proximal promoter |
| AT1G12451 | na                                | unknown proteir_1_4247123    | 19.08 | proximal promoter |
| AT1G12460 | na                                | Leucine-rich ref_1_4247123   | 19.08 | promoter          |
| AT1G07630 | POL-LIKE 5 (PLL5)                 | Encodes a prote_1_2351723    | 19.01 | downstream        |
| AT1G71720 | PIGMENT DEFECTIVE 338 (PDE338)    | Nucleic acid-bin_1_26983526  | 19    | promoter          |
| AT1G56140 | na                                | Leucine-rich ref_1_21007982  | 18.98 | promoter          |
| AT1G56145 | na                                | Leucine-rich ref_1_21007982  | 18.98 | downstream        |
| AT2G21380 | na                                | Kinesin motor fe_2_9140823   | 18.96 | proximal promoter |
| AT2G21370 | XYLULOSE KINASE-1 (XK-1)          | Although this ge_2_9140823   | 18.96 | proximal promoter |
| AT3G12300 | (BUG22)                           | unknown proteir_3_3923475    | 18.93 | promoter          |
| AT3G12320 | na                                | unknown proteir_3_3923475    | 18.93 | promoter          |
| AT1G80700 | na                                | unknown proteir_1_30331759   | 18.87 | promoter          |
| AT1G27370 | SQUAMOSA PROMOTER BINDING PRO     | In conjunction w_1_9507671   | 18.84 | five_prime_UTR    |
| AT5G14950 | GOLGI ALPHA-MANNOSIDASE II (GMII) | Encodes a golg_5_4841169     | 18.81 | intron            |
| AT1G01580 | FERRIC REDUCTION OXIDASE 2 (FRO2  | Encodes the lov_1_206958     | 18.78 | proximal promoter |
| AT4G36220 | FERULIC ACID 5-HYDROXYLASE 1 (FAH | encodes ferulat_4_17137647   | 18.78 | exon              |
| AT3G04290 | LI-TOLERANT LIPASE 1 (LTL1)       | Li-tolerant lipas_3_1135649  | 18.78 | intron            |
| AT1G01570 | na                                | FUNCTIONS IN_1_206958        | 18.78 | exon              |
| AT5G57700 | na                                | BNR/Asp-box re_5_23379053    | 18.72 | intergenic        |
| AT1G12320 | na                                | Protein of unknct_1_4192387  | 18.71 | intergenic        |
| AT1G12330 | na                                | unknown proteir_1_4192387    | 18.71 | proximal promoter |
| AT3G60220 | TOXICOS EN LEVADURA 4 (ATL4)      | Encodes a puta_3_22257260    | 18.71 | proximal promoter |
| AT5G63530 | FARNESYLATED PROTEIN 3 (FP3)      | Farnesylated pr_5_25437058   | 18.7  | intergenic        |
| AT2G26560 | PHOSPHOLIPASE A 2A (PLA2A)        | Encodes a lipid_2_11295959   | 18.68 | promoter          |
| AT5G41070 | DSRNA-BINDING PROTEIN 5 (DRB5)    | Encodes a dout_5_16440205    | 18.64 | downstream        |
| AT5G41080 | GLYCEROPHOSPHODIESTER PHOSPH      | Encodes a merr_5_16440205    | 18.64 | proximal promoter |

|           |                                    |                              |       |                   |
|-----------|------------------------------------|------------------------------|-------|-------------------|
| AT3G51140 | na                                 | Protein of unknc 3_18999651  | 18.64 | three_prime_UTR   |
| AT3G51150 | na                                 | ATP binding mic 3_18999651   | 18.64 | proximal promoter |
| AT5G41071 | na                                 | This gene encod 5_16440205   | 18.64 | exon              |
| AT2G35930 | PLANT U-BOX 23 (PUB23)             | Encodes a cyto 2_15084762    | 18.64 | promoter          |
| AT1G30350 | na                                 | Pectin lyase-like 1_10713642 | 18.63 | proximal promoter |
| AT5G54630 | na                                 | zinc finger prote 5_22195726 | 18.58 | proximal promoter |
| AT5G54640 | RESISTANT TO AGROBACTERIUM TRAI    | Isolated from T- 5_22195726  | 18.58 | proximal promoter |
| AT4G00400 | GLYCEROL-3-PHOSPHATE ACYLTRANS     | Involved in cutir 4_175763   | 18.57 | intron            |
| AT4G00413 | na                                 | pseudogene, sir 4_175763     | 18.57 | intergenic        |
| AT1G68400 | na                                 | leucine-rich rep 1_25649859  | 18.55 | proximal promoter |
| AT1G68410 | na                                 | Protein phosph 1_25649859    | 18.55 | downstream        |
| AT5G47050 | na                                 | SBP (S-ribonuc 5_19106330    | 18.51 | promoter          |
| AT1G71040 | LOW PHOSPHATE ROOT2 (LPR2)         | Encodes LPR2. 1_26796482     | 18.5  | intergenic        |
| AT1G71030 | MYB-LIKE 2 (MYBL2)                 | Encodes a puta 1_26796482    | 18.5  | promoter          |
| AT5G01712 | CONSERVED PEPTIDE UPSTREAM OPE     | Upstream open 5_266777       | 18.47 | proximal promoter |
| AT3G26530 | na                                 | transposable el 3_9737590    | 18.47 | proximal promoter |
| AT5G01720 | na                                 | RNI-like superfe 5_266777    | 18.47 | three_prime_UTR   |
| AT5G01710 | na                                 | methyltransfera 5_266777     | 18.47 | proximal promoter |
| AT5G01715 | na                                 | pseudogene, ar 5_266777      | 18.47 | promoter          |
| AT1G22640 | MYB DOMAIN PROTEIN 3 (MYB3)        | MYB-type trans 1_8010800     | 18.46 | intergenic        |
| AT4G15236 | ATP-BINDING CASSETTE G43 (ABCG43)  | ABC-2 and Plar 4_8695618     | 18.45 | proximal promoter |
| AT1G78410 | na                                 | VQ motif-contai 1_29501814   | 18.45 | proximal promoter |
| AT1G20650 | ALTERED SEED GERMINATION 5 (ASG)   | Protein kinase s 1_7160792   | 18.43 | promoter          |
| AT3G14000 | (ATBRXL2)                          | Belongs to five- 3_4634766   | 18.42 | proximal promoter |
| AT1G61740 | na                                 | Sulfite exporter 1_22799452  | 18.35 | intron            |
| AT5G66310 | na                                 | ATP binding mic 5_26492411   | 18.35 | proximal promoter |
| AT1G79370 | CYTOCHROME P450, FAMILY 79, SUBF   | member of CYP 1_29857266     | 18.33 | proximal promoter |
| AT3G07370 | CARBOXYL TERMINUS OF HSC70-INTE    | Encodes AtCHL1 3_2357314     | 18.29 | intergenic        |
| AT3G07360 | PLANT U-BOX 9 (PUB9)               | Encodes a prote 3_2357314    | 18.29 | intergenic        |
| AT5G02021 | na                                 | This gene encod 5_388960     | 18.26 | promoter          |
| AT5G02025 | na                                 | pre-tRNA; tRNA 5_388960      | 18.26 | intergenic        |
| AT5G02010 | RHO GUANYL-NUCLEOTIDE EXCHANGI     | Encodes a merr 5_388960      | 18.26 | intergenic        |
| AT5G02020 | SALT INDUCED SERINE RICH (SIS)     | Encodes a prote 5_388960     | 18.26 | proximal promoter |
| AT3G60130 | BETA GLUCOSIDASE 16 (BGLU16)       | beta glucosidas 3_22209297   | 18.25 | proximal promoter |
| AT3G48980 | na                                 | CONTAINS Inte 3_18155830     | 18.23 | intron            |
| AT2G43910 | HARMLESS TO OZONE LAYER 1 (HOL1)   | HARMLESS TC 2_18188078       | 18.22 | proximal promoter |
| AT2G43920 | HARMLESS TO OZONE LAYER 2 (HOL2)   | HARMLESS TC 2_18188078       | 18.22 | intergenic        |
| AT4G28290 | na                                 | unknown proteir 4_14013051   | 18.22 | promoter          |
| AT4G28300 | na                                 | Encodes a prote 4_14013051   | 18.22 | proximal promoter |
| AT1G61910 | na                                 | pre-tRNA; tRNA 1_22885862    | 18.2  | proximal promoter |
| AT1G61900 | na                                 | unknown proteir 1_22885862   | 18.2  | proximal promoter |
| AT4G34170 | na                                 | Galactose oxid 4_16364642    | 18.2  | intergenic        |
| AT4G25630 | FIBRILLARIN 2 (FIB2)               | encodes a fibrill 4_13073216 | 18.19 | proximal promoter |
| AT4G30340 | DIACYLGLYCEROL KINASE 7 (DGK7)     | encodes a diacy 4_14841500   | 18.18 | promoter          |
| AT2G18260 | SYNTAXIN OF PLANTS 112 (SYP112)    | member of SYP 2_7943894      | 18.17 | intergenic        |
| AT4G16144 | ASSOCIATED MOLECULE WITH THE SH    | Encodes AMSH 4_9142585       | 18.13 | proximal promoter |
| AT4G16146 | na                                 | cAMP-regulatec 4_9142585     | 18.13 | three_prime_UTR   |
| AT2G48030 | na                                 | DNAse I-like su 2_19649083   | 18.13 | intron            |
| AT1G68020 | (ATTPS6)                           | Encodes an enz 1_25496759    | 18.11 | proximal promoter |
| AT2G03660 | na                                 | pre-tRNA; tRNA 2_1112428     | 18.11 | intergenic        |
| AT5G50090 | na                                 | unknown proteir 5_20369814   | 18.1  | promoter          |
| AT2G28160 | FER-LIKE REGULATOR OF IRON UPTAK   | Encodes a puta 2_12002529    | 18.09 | proximal promoter |
| AT2G28150 | na                                 | FUNCTIONS IN 2_12002529      | 18.09 | downstream        |
| AT5G65660 | na                                 | hydroxyproline- 5_26248106   | 18.07 | proximal promoter |
| AT1G20010 | TUBULIN BETA-5 CHAIN (TUB5)        | beta tubulin 1_6939525       | 18.06 | intron            |
| AT3G53550 | na                                 | FBD-like domai 3_19855650    | 18.05 | proximal promoter |
| AT1G66760 | na                                 | MATE efflux fan 1_24898774   | 18.01 | intergenic        |
| AT4G00370 | (ANTR2)                            | Encodes an ino 4_163602      | 18    | intron            |
| AT4G18710 | BRASSINOSTEROID-INSENSITIVE 2 (BIN | ATSK (shaggy-I 4_10296229    | 18    | promoter          |
| AT4G00360 | CYTOCHROME P450, FAMILY 86, SUBF   | Encodes a merr 4_163602      | 18    | intergenic        |
| AT4G37740 | GROWTH-REGULATING FACTOR 2 (GR     | Growth regulatr 4_17728573   | 18    | proximal promoter |
| AT1G12020 | na                                 | unknown proteir 1_4062482    | 18    | three_prime_UTR   |
| AT2G28070 | ATP-BINDING CASSETTE G3 (ABCG3)    | ABC-2 type tran 2_11955030   | 17.97 | proximal promoter |
| AT1G35510 | na                                 | O-fucosyltransf 1_13071197   | 17.93 | five_prime_UTR    |
| AT4G14050 | na                                 | Pentatricopeptic 4_8103467   | 17.89 | downstream        |
| AT4G14040 | SELENIUM-BINDING PROTEIN 2 (SBP2)  | selenium-bindin 4_8103467    | 17.89 | proximal promoter |
| AT5G47380 | na                                 | Protein of unknc 5_19224871  | 17.83 | promoter          |
| AT2G46225 | ABI-1-LIKE 1 (ABIL1)               | Encodes a sub 2_18981492     | 17.82 | promoter          |
| AT2G46220 | na                                 | Uncharacterize 2_18981492    | 17.82 | intergenic        |
| AT2G46210 | SPHINGOID LCB DESATURASE 2 (SLD2)  | Fatty acid/sphin 2_18981492  | 17.82 | intergenic        |
| AT1G75800 | na                                 | Pathogenesis-rr 1_28461421   | 17.81 | intergenic        |
| AT1G75810 | na                                 | unknown proteir 1_28461421   | 17.81 | promoter          |
| AT1G75790 | SKU5 SIMILAR 18 (sks18)            | SKU5 similar 1: 1_28461421   | 17.81 | intergenic        |
| AT3G16690 | (SWEET16)                          | Nodulin MtN3 fe 3_5686630    | 17.74 | promoter          |
| AT3G16700 | na                                 | Fumarylacetoac 3_5686630     | 17.74 | proximal promoter |
| AT3G02570 | MATERNAL EFFECT EMBRYO ARREST      | Encodes a prote 3_545745     | 17.72 | promoter          |
| AT3G02580 | STEROL 1 (STE1)                    | Brassinosteroid 3_545745     | 17.72 | proximal promoter |
| AT1G54390 | INHIBITOR OF GROWTH 2 (ING2)       | ING2 encodes e 1_20304128    | 17.69 | intergenic        |
| AT5G14430 | na                                 | S-adenosyl-L-m 5_4652145     | 17.69 | proximal promoter |
| AT1G54385 | na                                 | ARM repeat sur 1_20304128    | 17.69 | promoter          |
| AT5G14420 | RING DOMAIN LIGASE2 (RGLG2)        | Encodes RGLG 5_4652145       | 17.69 | proximal promoter |
| AT1G73470 | na                                 | unknown proteir 1_27627911   | 17.65 | downstream        |
| AT1G73480 | na                                 | alpha/beta-Hydr 1_27627911   | 17.65 | proximal promoter |
| AT1G31650 | RHO GUANYL-NUCLEOTIDE EXCHANGI     | Encodes a merr 1_11329454    | 17.65 | intron            |
| AT1G66350 | RGAL-LIKE 1 (RGL1)                 | Negative regula 1_24743969   | 17.64 | intergenic        |
| AT5G05430 | na                                 | RNA-binding pri 5_1608507    | 17.58 | proximal promoter |
| AT5G05435 | na                                 | Potential natura 5_1608507   | 17.58 | intergenic        |
| AT5G05450 | na                                 | P-loop containr 5_1608507    | 17.58 | intergenic        |
| AT5G05440 | PYRABACTIN RESISTANCE 1-LIKE 5 (P) | Encodes a merr 5_1608507     | 17.58 | proximal promoter |
| AT1G16500 | na                                 | unknown proteir 1_5636564    | 17.55 | proximal promoter |
| AT3G58080 | na                                 | unknown proteir 3_21510431   | 17.48 | intron            |
| AT2G32940 | ARGONAUTE 6 (AGO6)                 | Encodes a nucl 2_13971782    | 17.47 | downstream        |
| AT2G32930 | ZINC FINGER NUCLEASE 2 (ZFN2)      | Encodes a zinc 2_13971782    | 17.47 | proximal promoter |
| AT5G61960 | MEI2-LIKE PROTEIN 1 (ML1)          | A member of mk 5_24884752    | 17.45 | promoter          |

|           |                                   |                              |       |                   |
|-----------|-----------------------------------|------------------------------|-------|-------------------|
| AT1G58210 | EMBRYO DEFECTIVE 1674 (EMB1674)   | Encodes a merr 1_21553277    | 17.41 | promoter          |
| AT4G24150 | GROWTH-REGULATING FACTOR 8 (GR)   | Growth regulati 4_12536906   | 17.41 | intron            |
| AT5G65310 | HOMEBOX PROTEIN 5 (HB5)           | Encodes a clas 5_26100618    | 17.41 | intergenic        |
| AT1G58200 | MSCS-LIKE 3 (MSL3)                | A member of M: 1_21553277    | 17.41 | promoter          |
| AT2G45980 | ATG8-INTERACTING PROTEIN 1 (ATI1) | Encodes an Atg 2_18914684    | 17.37 | intergenic        |
| AT2G45970 | CYTOCHROME P450, FAMILY 86, SUBF  | Encodes a merr 2_18914684    | 17.37 | five_prime_UTR    |
| AT2G45960 | PLASMA MEMBRANE INTRINSIC PROTE   | a member of the 2_18914684   | 17.37 | intergenic        |
| AT2G45950 | SKP1-LIKE 20 (SK20)               | SKP1-like 20 (S 2_18914684   | 17.37 | intergenic        |
| AT3G23040 | na                                | unknown protei 3_8186832     | 17.35 | exon              |
| AT2G33180 | na                                | unknown protei 2_14065843    | 17.35 | proximal promoter |
| AT5G43700 | AUXIN INDUCIBLE 2-11 (ATAUX2-11)  | Auxin inducible 5_17550077   | 17.33 | promoter          |
| AT5G43695 | na                                | unknown protei 5_17550077    | 17.33 | intergenic        |
| AT3G62980 | TRANSPORT INHIBITOR RESPONSE 1 (  | Encodes an au 3_23276583     | 17.33 | promoter          |
| AT3G05640 | na                                | Protein phosph 3_1644438     | 17.32 | proximal promoter |
| AT4G26400 | na                                | RING/U-box su 4_13344694     | 17.31 | downstream        |
| AT2G41990 | na                                | CONTAINS Inte 2_17527078     | 17.27 | promoter          |
| AT4G22010 | SKU5 SIMILAR 4 (sks4)             | SKU5 similar 4 4_11662556    | 17.26 | proximal promoter |
| AT3G60400 | na                                | Mitochondrial tr 3_22328139  | 17.25 | proximal promoter |
| AT1G67410 | na                                | Exostosin family 1_25256137  | 17.23 | proximal promoter |
| AT1G67420 | na                                | Zn-dependent e 1_25256137    | 17.23 | intron            |
| AT4G34710 | ARGININE DECARBOXYLASE 2 (ADC2)   | encodes a argir 4_16566053   | 17.19 | intergenic        |
| AT5G53400 | BOBBER1 (BOB1)                    | Encodes BOBB 5_21663766      | 17.17 | downstream        |
| AT2G41820 | na                                | Leucine-rich re 2_17446655   | 17.16 | promoter          |
| AT2G31570 | GLUTATHIONE PEROXIDASE 2 (GPX2)   | glutathione per 2_13437953   | 17.14 | downstream        |
| AT2G31560 | na                                | Protein of unkn 2_13437953   | 17.14 | three_prime_UTR   |
| AT4G39390 | NUCLEOTIDE SUGAR TRANSPORTER-F    | Encodes a golg 4_18318260    | 17.12 | downstream        |
| AT1G10060 | BRANCHED-CHAIN AMINO ACID TRANS   | encodes a mito 1_3283985     | 17.11 | promoter          |
| AT5G05370 | na                                | Cytochrome b-c 5_1592113     | 17.1  | promoter          |
| AT5G05380 | PRENYLATED RAB ACCEPTOR 1.B3 (PF  | prenylated RAB 5_1592113     | 17.1  | promoter          |
| AT5G05200 | na                                | Protein kinase s 5_1547283   | 17.09 | promoter          |
| AT5G05210 | na                                | Surfeit locus pr 5_1547283   | 17.09 | promoter          |
| AT5G21090 | na                                | Leucine-rich re 5_7164144    | 17.08 | promoter          |
| AT5G22740 | CELLULOSE SYNTHASE-LIKE A02 (CSL  | encodes a beta 5_7557799     | 17.06 | intron            |
| AT2G44660 | na                                | ALG6, ALG8 gly 2_18423371    | 17.04 | proximal promoter |
| AT5G61600 | ETHYLENE RESPONSE FACTOR 104 (E   | encodes a mem 5_24764159     | 17.02 | intergenic        |
| AT5G61590 | na                                | encodes a mem 5_24764159     | 17.02 | intergenic        |
| AT5G61580 | PHOSPHOFRUCTOKINASE 4 (PFK4)      | phosphofructoki 5_24764159   | 17.02 | downstream        |
| AT3G07350 | na                                | Protein of unkn 3_2348978    | 17.01 | downstream        |
| AT1G80290 | na                                | a member of the 1_30188280   | 17.01 | promoter          |
| AT1G01260 | na                                | basic helix-loop 1_108239    | 17    | proximal promoter |
| AT1G28440 | HAESA-LIKE 1 (HSL1)               | HAESA-like 1 (H 1_10001675   | 16.99 | intergenic        |
| AT1G28447 | na                                | Pseudogene of 1_10001675     | 16.99 | proximal promoter |
| AT5G45100 | BOI-RELATED GENE 1 (BRG1)         | Encodes one of 5_18215847    | 16.92 | proximal promoter |
| AT3G19540 | na                                | Protein of unkn 3_6783542    | 16.92 | intergenic        |
| AT1G60190 | PLANT U-BOX 19 (PUB19)            | Encodes PUB11 1_22200334     | 16.91 | exon              |
| AT1G22330 | na                                | RNA-binding (R 1_7888922     | 16.9  | intron            |
| AT5G19380 | CRT (CHLOROQUINE-RESISTANCE TR    | Encodes one of 5_6531542     | 16.89 | proximal promoter |
| AT5G19390 | na                                | Encodes a prote 5_6531542    | 16.89 | five_prime_UTR    |
| AT1G21060 | na                                | Protein of unkn 1_7370620    | 16.88 | proximal promoter |
| AT4G05320 | POLYUBIQUITIN 10 (UBQ10)          | One of five poly 4_2718056   | 16.85 | promoter          |
| AT5G22940 | FRA8 HOMOLOG (F8H)                | Homolog of FR/ 5_7678938     | 16.84 | three_prime_UTR   |
| AT4G37330 | CYTOCHROME P450, FAMILY 81, SUBF  | member of CYP 4_17564020     | 16.81 | intron            |
| AT3G11700 | FASCICLIN-LIKE ARABINOGLACTAN P   | FASCICLIN-like 3_3697925     | 16.8  | proximal promoter |
| AT5G40470 | na                                | RNI-like superfe 5_16207152  | 16.78 | intergenic        |
| AT2G47060 | PTO-INTERACTING 1-4 (PTI1-4)      | Encodes Pto-int 2_19336371   | 16.7  | proximal promoter |
| AT2G47070 | SQUAMOS A PROMOTER BINDING PRO    | member of SPL 2_19336371     | 16.7  | promoter          |
| AT2G35920 | na                                | RNA helicase fe 2_15081204   | 16.69 | intergenic        |
| AT2G35930 | PLANT U-BOX 23 (PUB23)            | Encodes a cyto 2_15081204    | 16.69 | intergenic        |
| AT3G59900 | AUXIN-REGULATED GENE INVOLVED II  | Encodes ARG 3_22128996       | 16.67 | proximal promoter |
| AT4G18205 | na                                | Nucleotide-sug 4_10078435    | 16.67 | intergenic        |
| AT4G18220 | na                                | Drug/metabolite 4_10078435   | 16.67 | promoter          |
| AT4G18210 | PURINE PERMEASE 10 (PUP10)        | Member of a far 4_10078435   | 16.67 | intergenic        |
| AT5G66580 | na                                | unknown protei 5_26572366    | 16.65 | promoter          |
| AT5G66590 | na                                | CAP (Cysteine- 5_26572366    | 16.65 | proximal promoter |
| AT5G66600 | na                                | Protein of unkn 5_26572366   | 16.65 | intergenic        |
| AT3G60520 | na                                | unknown protei 3_22363532    | 16.64 | proximal promoter |
| AT5G67250 | SKP1/ASK1-INTERACTING PROTEIN 2 ( | Encodes an SK 5_26833541     | 16.62 | promoter          |
| AT1G67890 | na                                | PAS domain-co 1_25464402     | 16.61 | intergenic        |
| AT1G67900 | na                                | Phototropic-res 1_25464402   | 16.61 | promoter          |
| AT3G24670 | na                                | Pectin lyase-like 3_9007802  | 16.59 | intron            |
| AT1G19330 | na                                | unknown protei 1_6683678     | 16.54 | promoter          |
| AT1G19340 | na                                | Methyltransfera 1_6683678    | 16.54 | proximal promoter |
| AT3G02120 | na                                | hydroxyproline- 3_375803     | 16.54 | proximal promoter |
| AT3G02110 | SERINE CARBOXYPEPTIDASE-LIKE 25 ( | serine carboxyp 3_375803     | 16.54 | proximal promoter |
| AT3G54820 | PLASMA MEMBRANE INTRINSIC PROTE   | plasma membra 3_20302985     | 16.48 | intron            |
| AT3G18490 | ASPARTIC PROTEASE IN GUARD CELL   | Encodes ASPG 3_6350663       | 16.47 | five_prime_UTR    |
| AT3G30775 | EARLY RESPONSIVE TO DEHYDRATION   | Encodes a proli 3_12453923   | 16.47 | proximal promoter |
| AT4G27520 | EARLY NODULIN-LIKE PROTEIN 2 (ENO | early nodulin-lik 4_13749433 | 16.46 | intergenic        |
| AT4G27510 | na                                | unknown protei 4_13749433    | 16.46 | promoter          |
| AT5G55120 | VITAMIN C DEFECTIVE 5 (VTC5)      | Encodes a GDF 5_22369071     | 16.45 | promoter          |
| AT4G16490 | na                                | ARM repeat su 4_9295851      | 16.43 | promoter          |
| AT1G22400 | (UGT85A1)                         | UGT85A1; FUN 1_7904996       | 16.42 | intron            |
| AT3G16240 | DELTA TONOPLAST INTEGRAL PROTEI   | Delta tonoplast 3_5504694    | 16.42 | proximal promoter |
| AT4G01950 | GLYCEROL-3-PHOSPHATE ACYLTRANS    | Encodes a merr 4_845627      | 16.42 | intron            |
| AT4G01940 | NFU DOMAIN PROTEIN 1 (NFU1)       | Encodes a prote 4_845627     | 16.42 | proximal promoter |
| AT3G16250 | PHOTOSYNTHETIC NDH SUBCOMPLE      | encodes a nove 3_5504694     | 16.42 | intergenic        |
| AT1G22380 | UDP-GLUCOSYL TRANSFERASE 85A3 (   | Encodes a puta 1_7904996     | 16.42 | proximal promoter |
| AT1G20340 | DNA-DAMAGE-REPAIR/TOLERATION PF   | recombination a 1_7038291    | 16.41 | intergenic        |
| AT1G20330 | STEROL METHYLTRANSFERASE 2 (SM    | Encodes a sterc 1_7038291    | 16.41 | intergenic        |
| AT1G32640 | (MYC2)                            | Encodes a MYC 1_11801052     | 16.39 | promoter          |
| AT1G32630 | na                                | unknown protei 1_11801052    | 16.39 | intergenic        |
| AT2G45600 | na                                | alpha/beta-Hydr 2_18790584   | 16.35 | exon              |
| AT2G45590 | na                                | Protein kinase s 2_18790584  | 16.35 | intergenic        |
| AT2G44210 | na                                | Protein of Unkn 2_18278511   | 16.35 | proximal promoter |

|           |                                   |                              |       |                   |
|-----------|-----------------------------------|------------------------------|-------|-------------------|
| AT2G44200 | na                                | CBF1-interactin 2_18278511   | 16.35 | three_prime_UTR   |
| AT1G72180 | na                                | Leucine-rich rec 1_27160200  | 16.34 | proximal promoter |
| AT5G05140 | na                                | Transcription el 5_1523018   | 16.33 | intergenic        |
| AT1G01115 | na                                | unknown proteir 1_55538      | 16.33 | proximal promoter |
| AT3G51010 | na                                | unknown proteir 3_18948299   | 16.3  | promoter          |
| AT4G25490 | C-REPEAT/DRE BINDING FACTOR 1 (CE | Transcriptional i 4_13023624 | 16.29 | proximal promoter |
| AT1G30370 | DAD1-LIKE ACYLHYDROLASE (DLAH)    | Encodes a mito 1_10715617    | 16.28 | intergenic        |
| AT1G30360 | EARLY-RESPONSIVE TO DEHYDRATIO    | early-responsiv 1_10715617   | 16.28 | promoter          |
| AT1G22570 | na                                | Major facilitator 1_7975302  | 16.27 | intergenic        |
| AT3G62070 | na                                | unknown proteir 3_22985465   | 16.24 | proximal promoter |
| AT3G62080 | na                                | SNF7 family prc 3_22985465   | 16.24 | proximal promoter |
| AT5G67310 | CYTOCHROME P450, FAMILY 81, SUBF  | member of CYP 5_26853797     | 16.23 | intergenic        |
| AT5G67300 | MYB DOMAIN PROTEIN R1 (MYBR1)     | Member of the f 5_26853797   | 16.23 | promoter          |
| AT4G27740 | na                                | Yippee family pt 4_13838808  | 16.22 | promoter          |
| AT2G01670 | NUDIX HYDROLASE HOMOLOG 17 (NUI   | nudix hydrolase 2_299381     | 16.22 | proximal promoter |
| AT4G27730 | OLIGOPEPTIDE TRANSPORTER 1 (OPT   | oligopeptide tra 4_13838808  | 16.22 | proximal promoter |
| AT2G23170 | (GH3.3)                           | encodes an IAA 2_9866788     | 16.21 | promoter          |
| AT2G23171 | na                                | unknown proteir 2_9866788    | 16.21 | exon              |
| AT3G57400 | na                                | unknown proteir 3_21237026   | 16.17 | proximal promoter |
| AT3G19540 | na                                | Protein of unknc 3_6780464   | 16.15 | promoter          |
| AT2G35880 | na                                | TPX2 (targeting 2_15066338   | 16.15 | promoter          |
| AT2G21660 | GLYCINE-RICH RNA-BINDING PROTEIN  | Encodes a smal 2_9266542     | 16.14 | promoter          |
| AT2G21670 | na                                | pre-tRNA; tRNA 2_9266542     | 16.14 | intergenic        |
| AT4G34250 | 3-KETOACYL-COA SYNTHASE 16 (KCS1  | Encodes KCS1 4_16394660      | 16.13 | promoter          |
| AT4G34240 | ALDEHYDE DEHYDROGENASE 3I1 (AL    | Aldehyde dehyd 4_16394660    | 16.13 | intergenic        |
| AT3G01830 | na                                | Calcium-binding 3_295660     | 16.12 | promoter          |
| AT3G01820 | na                                | P-loop containir 3_295660    | 16.12 | promoter          |
| AT4G36250 | ALDEHYDE DEHYDROGENASE 3F1 (AL    | Encodes a puta 4_17150706    | 16.09 | promoter          |
| AT4G36240 | GATA TRANSCRIPTION FACTOR 7 (GAT  | Encodes a merr 4_17150706    | 16.09 | proximal promoter |
| AT4G36245 | na                                | pre-tRNA; tRNA 4_17150706    | 16.09 | intergenic        |
| AT5G24530 | DOWNY MILDEW RESISTANT 6 (DMR6)   | Encodes a puta 5_8376521     | 16.08 | proximal promoter |
| AT4G39400 | BRASSINOSTEROID INSENSITIVE 1 (BR | Encodes a plasi 4_18322715   | 16.04 | proximal promoter |
| AT3G57450 | na                                | unknown proteir 3_21261339   | 16.04 | proximal promoter |
| AT3G57460 | na                                | catalytic;metal 3_21261339   | 16.04 | intergenic        |
| AT5G59540 | na                                | 2-oxoglutarate ( 5_23999864  | 16.03 | proximal promoter |
| AT2G42840 | PROTODERMAL FACTOR 1 (PDF1)       | Encodes a puta 2_17825836    | 16.03 | intergenic        |
| AT5G59550 | RING AND DOMAIN OF UNKNOWN FUN    | Encodes an AB 5_23999864     | 16.03 | promoter          |
| AT5G59560 | SENSITIVITY TO RED LIGHT REDUCED  | Encodes a nove 5_23999864    | 16.03 | intergenic        |
| AT3G26932 | DSRNA-BINDING PROTEIN 3 (DRB3)    | dsRNA-binding 3_9930200      | 16.02 | downstream        |
| AT2G27385 | na                                | Pollen Ole e 1 a 2_11717439  | 16.02 | promoter          |
| AT2G41550 | na                                | Rho termination 2_17331371   | 16.02 | promoter          |
| AT3G07450 | na                                | Bifunctional inhi 3_2388687  | 16.02 | intergenic        |
| AT3G07460 | na                                | Protein of unknc 3_2388687   | 16.02 | proximal promoter |
| AT3G07470 | na                                | Protein of unknc 3_2388687   | 16.02 | promoter          |
| AT3G07480 | na                                | 2Fe-2S ferredox 3_2388687    | 16.02 | promoter          |
| AT3G26934 | na                                | unknown proteir 3_9930200    | 16.02 | proximal promoter |
| AT1G21390 | EMBRYO DEFECTIVE 2170 (emb2170)   | embryo defectiv 1_7488922    | 16.01 | downstream        |
| AT1G21380 | na                                | Target of Myb p 1_7488922    | 16.01 | promoter          |
| AT2G22800 | (HAT9)                            | Encodes homec 2_9702847      | 15.97 | intergenic        |
| AT3G15850 | FATTY ACID DESATURASE 5 (FAD5)    | Chloroplastic er 3_5358834   | 15.96 | promoter          |
| AT3G15840 | POST-ILLUMINATION CHLOROPHYLL F   | Encodes a chl 3_5358834      | 15.96 | promoter          |
| AT1G05010 | ETHYLENE-FORMING ENZYME (EFE)     | Encodes 1-amir 1_1434694     | 15.95 | proximal promoter |
| AT1G05020 | na                                | ENTH/ANTH/Vt 1_1434694       | 15.95 | intergenic        |
| AT2G01570 | REPRESSOR OF GA1-3 1 (RGA1)       | Member of the 1_259132       | 15.93 | proximal promoter |
| AT5G44030 | CELLULOSE SYNTHASE A4 (CESA4)     | Encodes a cellu 5_17711801   | 15.91 | proximal promoter |
| AT5G44020 | na                                | HAD superfamil 5_17711801    | 15.91 | proximal promoter |
| AT4G29190 | OXIDATION-RELATED ZINC FINGER 2 ( | Zinc finger C-x8 4_14396889  | 15.91 | intergenic        |
| AT1G53830 | PECTIN METHYLESTERASE 2 (PME2)    | encodes a pecti 1_20097025   | 15.9  | proximal promoter |
| AT5G49760 | na                                | Leucine-rich re 5_20216325   | 15.89 | promoter          |
| AT1G53170 | ETHYLENE RESPONSE FACTOR 8 (ERF   | encodes a mem 1_19825481     | 15.87 | intergenic        |
| AT1G15750 | TOPLESS (TPL)                     | Encodes a prote 1_5421457    | 15.86 | promoter          |
| AT4G05060 | na                                | PapD-like super 4_2589394    | 15.82 | intergenic        |
| AT4G05049 | na                                | unknown pseud 4_2589394      | 15.82 | intergenic        |
| AT4G05053 | na                                | pseudogene of 4_2589394      | 15.82 | promoter          |
| AT5G52250 | REPRESSOR OF UV-B PHOTOMORPHIC    | Encodes a trans 5_21216059   | 15.82 | proximal promoter |
| AT4G05050 | UBIQUITIN 11 (UBQ11)              | polyubiquitin ge 4_2589394   | 15.82 | promoter          |
| AT5G11050 | MYB DOMAIN PROTEIN 64 (MYB64)     | Member of R2R 5_3505416      | 15.79 | intergenic        |
| AT4G18975 | na                                | Pentatricopeptic 4_10390937  | 15.76 | intergenic        |
| AT4G18970 | na                                | GDSL-like Lipas 4_10390937   | 15.76 | intron            |
| AT3G24630 | TON1 RECRUITING MOTIF 34 (TRM34)  | unknown proteir 3_8986229    | 15.76 | proximal promoter |
| AT5G60710 | na                                | Zinc finger (C3f 5_24417257  | 15.75 | proximal promoter |
| AT1G02060 | na                                | Tetratricopeptid 1_364362    | 15.74 | proximal promoter |
| AT5G47600 | na                                | HSP20-like chai 5_19302109   | 15.7  | proximal promoter |
| AT5G47610 | na                                | RING/U-box suj 5_19302109    | 15.7  | promoter          |
| AT5G47620 | na                                | RNA-binding (R 5_19302109    | 15.7  | downstream        |
| AT1G76110 | na                                | HMG (high mob 1_28553035     | 15.69 | intergenic        |
| AT1G76100 | PLASTOCYANIN 1 (PETE1)            | One of two Ara1 1_28553035   | 15.69 | intergenic        |
| AT3G02550 | LOB DOMAIN-CONTAINING PROTEIN 41  | LOB domain-co 3_538416       | 15.68 | promoter          |
| AT3G48450 | na                                | RPM1-interactir 3_17947112   | 15.68 | proximal promoter |
| AT1G01840 | na                                | unknown proteir 1_302737     | 15.68 | proximal promoter |
| AT1G01830 | na                                | ARM repeat suj 1_302737      | 15.68 | promoter          |
| AT3G02540 | RADIATION SENSITIVE23C (RAD23C)   | Encodes a merr 3_538416      | 15.68 | proximal promoter |
| AT1G27360 | SQUAMOSIA PROMOTER-LIKE 11 (SPL1  | In conjunction w 1_9501581   | 15.62 | intron            |
| AT3G51057 | na                                | This gene encoi 3_18960690   | 15.6  | intergenic        |
| AT1G14910 | na                                | ENTH/ANTH/Vt 1_5147996       | 15.55 | intergenic        |
| AT2G46535 | na                                | unknown proteir 2_19109229   | 15.51 | promoter          |
| AT5G45950 | na                                | GDSL-like Lipas 5_18635321   | 15.5  | intron            |
| AT3G22380 | TIME FOR COFFEE (TIC)             | Encodes a nucl 3_7911306     | 15.48 | proximal promoter |
| AT4G34160 | CYCLIN D3;1 (CYCD3;1)             | encodes a cycli 4_16361687   | 15.46 | intergenic        |
| AT2G42440 | ASYMMETRIC LEAVES 2-LIKE 15 (ASL1 | Lateral organ br 2_17667909  | 15.45 | intergenic        |
| AT5G60210 | ROP INTERACTIVE PARTNER 5 (RIP5)  | ROP interactive 5_24245984   | 15.45 | promoter          |
| AT1G76580 | na                                | Squamosa pron 1_28738993     | 15.44 | downstream        |
| AT1G76590 | na                                | PLATZ transcri 1_28738993    | 15.44 | proximal promoter |
| AT5G57590 | BIOTIN AUXOTROPH 1 (BIO1)         | Mutant complex 5_23323817    | 15.43 | proximal promoter |



|           |                                   |                  |              |       |                   |
|-----------|-----------------------------------|------------------|--------------|-------|-------------------|
| AT4G29700 | na                                | Alkaline-phosph  | 4_14545927   | 15.42 | proximal promoter |
| AT1G31930 | EXTRA-LARGE GTP-BINDING PROTEIN   | Encodes XLG3     | 1_11469371   | 15.41 | downstream        |
| AT4G31805 | na                                | WRKY family tr   | 4_15385295   | 15.41 | five_prime_UTR    |
| AT1G11270 | na                                | F-box and asso   | 1_3776150    | 15.41 | intergenic        |
| AT1G31935 | na                                | other RNA        | 1_11469371   | 15.41 | promoter          |
| AT2G19806 | na                                | transposable elk | 2_8544726    | 15.41 | proximal promoter |
| AT1G31940 | na                                | unknown protei   | 1_11469371   | 15.41 | intergenic        |
| AT1G11260 | SUGAR TRANSPORTER 1 (STP1)        | Encodes a H+/t   | 1_3776150    | 15.41 | proximal promoter |
| AT4G31800 | WRKY DNA-BINDING PROTEIN 18 (WRK  | Pathogen-induc   | 4_15385295   | 15.41 | intergenic        |
| AT1G01430 | TRICHOME BIREFRINGENCE-LIKE 25 (T | Encodes a merr   | 1_156668     | 15.4  | downstream        |
| AT1G01420 | UDP-GLUCOSYL TRANSFERASE 72B3 (   | UDP-glucosyl tr  | 1_156668     | 15.4  | proximal promoter |
| AT2G18690 | na                                | unknown protei   | 2_8097204    | 15.39 | promoter          |
| AT3G59940 | na                                | Galactose oxid   | 3_22141792   | 15.37 | proximal promoter |
| AT3G59930 | na                                | Encodes a defe   | 3_22141792   | 15.37 | proximal promoter |
| AT3G59950 | na                                | Peptidase fami   | 3_22141792   | 15.37 | intergenic        |
| AT1G75640 | na                                | Leucine-rich rec | 1_28406088   | 15.36 | exon              |
| AT3G29320 | ALPHA-GLUCAN PHOSPHORYLASE 1 (F   | Encodes a plasi  | 3_11252683   | 15.35 | promoter          |
| AT4G24660 | HOMEBOX PROTEIN 22 (HB22)         | homeobox prote   | 4_12727198   | 15.35 | proximal promoter |
| AT2G32150 | na                                | Haloacid dehal   | 2_13658293   | 15.35 | proximal promoter |
| AT4G24670 | TRYPTOPHAN AMINOTRANSFERASE R     | Encodes a prot   | 4_12727198   | 15.35 | intergenic        |
| AT1G69270 | RECEPTOR-LIKE PROTEIN KINASE 1 (R | RPK1 is a leucir | 1_26043168   | 15.34 | promoter          |
| AT4G19530 | na                                | Encodes a TIR-   | 4_10649584   | 15.32 | proximal promoter |
| AT1G66300 | na                                | F-box/RNI-like/F | 1_24720820   | 15.31 | proximal promoter |
| AT4G14310 | na                                | Transducin/WD    | 4_8240613    | 15.3  | promoter          |
| AT3G54740 | na                                | Protein of unkn  | 3_20261949   | 15.28 | promoter          |
| AT5G42950 | na                                | GYF domain-co    | 5_17224051   | 15.28 | promoter          |
| AT3G47610 | na                                | transcription re | 3_17551357   | 15.27 | three_prime_UTR   |
| AT4G12120 | (SEC1B)                           | member of KEU    | 4_7256183    | 15.25 | intergenic        |
| AT3G21320 | na                                | BEST Arabidop:   | 3_7502053    | 15.25 | promoter          |
| AT4G12115 | na                                | pre-tRNA; tRNA   | 4_7256183    | 15.25 | promoter          |
| AT4G12110 | STEROL-4ALPHA-METHYL OXIDASE 1-1  | Encodes a merr   | 4_7256183    | 15.25 | three_prime_UTR   |
| AT3G23740 | na                                | unknown protei   | 3_8551408    | 15.22 | intergenic        |
| AT3G62988 | na                                | This gene enc    | 3_23281755   | 15.22 | downstream        |
| AT3G23730 | XYLOGLUCAN ENDOTRANGLUCOSYL       | xyloglucan end   | 3_8551408    | 15.22 | downstream        |
| AT3G12290 | na                                | Amino acid deh   | 3_3919326    | 15.21 | promoter          |
| AT3G12280 | RETINOBLASTOMA-RELATED 1 (RBR1)   | Encodes a retin  | 3_3919326    | 15.21 | promoter          |
| AT4G21570 | na                                | Protein of unkn  | 4_11472935   | 15.19 | five_prime_UTR    |
| AT4G21560 | VACUOLAR PROTEIN SORTING-ASSOC    | vacuolar protei  | 4_11472935   | 15.19 | proximal promoter |
| AT4G03113 | na                                | unknown protei   | 4_1382629    | 15.17 | three_prime_UTR   |
| AT4G03115 | na                                | Mitochondrial st | 4_1382629    | 15.17 | three_prime_UTR   |
| AT4G27270 | na                                | Quinone reduct   | 4_13658749   | 15.16 | intergenic        |
| AT2G38370 | na                                | Plant protein of | 2_16074282   | 15.16 | promoter          |
| AT3G51940 | na                                | unknown protei   | 3_19276602   | 15.16 | proximal promoter |
| AT3G51950 | na                                | Zinc finger (CC  | 3_19276602   | 15.16 | intergenic        |
| AT3G22886 | MICRORNA167A (MIR167A)            | Encodes a micr   | 3_8104535    | 15.15 | intergenic        |
| AT4G18370 | DEGP PROTEASE 5 (DEG5)            | Encodes DEG5     | 4_10148862   | 15.09 | promoter          |
| AT4G18360 | na                                | Aldolase-type T  | 4_10148862   | 15.09 | promoter          |
| AT3G01500 | CARBONIC ANHYDRASE 1 (CA1)        | Encodes a puta   | 3_193593     | 15.08 | intergenic        |
| AT3G01490 | na                                | Protein kinase s | 3_193593     | 15.08 | promoter          |
| AT1G54040 | EPITHIOSPECIFIER PROTEIN (ESP)    | Epithiospecifi   | 1_20177102   | 15.06 | intergenic        |
| AT1G49500 | na                                | unknown protei   | 1_18323497   | 15.06 | proximal promoter |
| AT5G11060 | KNOTTED1-LIKE HOMEBOX GENE 4 (I   | A member of Cl   | 5_3508671    | 15.05 | proximal promoter |
| AT5G54280 | MYOSIN 2 (ATM2)                   | Type VII myosin  | 5_22046983   | 15.05 | proximal promoter |
| AT1G78040 | na                                | Pollen Ole e 1   | a 1_29345709 | 15.04 | promoter          |
| AT1G78050 | PHOSPHOGLYCERATE/BISPHOSPHOG      | phosphoglycera   | 1_29345709   | 15.04 | proximal promoter |
| AT3G18490 | ASPARTIC PROTEASE IN GUARD CELL   | Encodes ASPG     | 3_6346325    | 15.03 | intergenic        |
| AT4G14440 | 3-HYDROXYACYL-COA DEHYDRATASE     | encodes a cytos  | 4_8307843    | 15.01 | promoter          |
| AT2G46660 | CYTOCHROME P450, FAMILY 78, SUBF  | Encodes a merr   | 2_19153949   | 15.01 | exon              |
| AT5G17890 | DA1-RELATED PROTEIN 4 (DAR4)      | Encodes a prot   | 5_5915055    | 15.01 | proximal promoter |
| AT3G50060 | MYB DOMAIN PROTEIN 77 (MYB77)     | Encodes a merr   | 3_18559324   | 15.01 | promoter          |
| AT5G65305 | na                                | pre-tRNA; tRNA   | 5_26096647   | 15    | intergenic        |
| AT2G43680 | IQ-DOMAIN 14 (IQD14)              | IQ-domain 14 (I  | 2_18107242   | 14.99 | proximal promoter |
| AT2G23755 | na                                | unknown protei   | 2_10105268   | 14.99 | proximal promoter |
| AT3G59052 | CONSERVED PEPTIDE UPSTREAM OPE    | Upstream open    | 3_21830520   | 14.98 | intergenic        |
| AT1G17380 | JASMONATE-ZIM-DOMAIN PROTEIN 5 (  | jasmonate-zim-   | 1_5958026    | 14.98 | proximal promoter |
| AT3G59068 | na                                | Potential natura | 3_21830520   | 14.98 | proximal promoter |
| AT3G59070 | na                                | Cytochrome b5f   | 3_21830520   | 14.98 | intergenic        |
| AT3G59060 | PHYTOCHROME INTERACTING FACTO     | Encodes a nove   | 3_21830520   | 14.98 | promoter          |
| AT3G59050 | POLYAMINE OXIDASE 3 (PAO3)        | Encodes a poly;  | 3_21830520   | 14.98 | intergenic        |
| AT4G32010 | HSI2-LIKE 1 (HSL1)                | HSI2-like 1 (HS  | 1_15485990   | 14.95 | intergenic        |
| AT4G32020 | na                                | unknown protei   | 4_15485990   | 14.95 | proximal promoter |
| AT1G01290 | COFACTOR OF NITRATE REDUCTASE /   | COFACTOR OF      | 1_118660     | 14.94 | intergenic        |
| AT1G01300 | na                                | Eukaryotic aspa  | 1_118660     | 14.94 | three_prime_UTR   |
| AT2G28056 | MICRORNA172A (MIR172A)            | Encodes a micr   | 2_11947551   | 14.93 | intergenic        |
| AT4G34760 | na                                | SAUR-like auxi   | 4_16583049   | 14.92 | promoter          |
| AT3G63150 | MIRO-RELATED GTP-ASE 2 (MIRO2)    | Encodes a calci  | 3_23332837   | 14.91 | five_prime_UTR    |
| AT2G22760 | na                                | basic helix-loop | 2_9677081    | 14.91 | proximal promoter |
| AT3G61910 | NAC DOMAIN PROTEIN 66 (NAC066)    | NAC transcripti  | 3_22929421   | 14.9  | exon              |
| AT1G27960 | EVOLUTIONARILY CONSERVED C-TER    | encodes a prote  | 1_9740031    | 14.89 | intergenic        |
| AT1G27950 | GLYCOSYLPHOSPHATIDYLINOSITOL-A    | Encodes LTPG:    | 1_9740031    | 14.89 | proximal promoter |
| AT1G78170 | na                                | unknown protei   | 1_29413435   | 14.88 | proximal promoter |
| AT1G78172 | na                                | unknown protei   | 1_29413435   | 14.88 | proximal promoter |
| AT3G16830 | TOPLESS-RELATED 2 (TPR2)          | TOPLESS-relat    | 3_5731143    | 14.88 | promoter          |
| AT3G10572 | ABERRANT PEROXISOME MORPHOLO      | APEM9 is requi   | 3_3304012    | 14.85 | promoter          |
| AT3G10570 | CYTOCHROME P450, FAMILY 77, SUBF  | member of CYP    | 3_3304012    | 14.85 | downstream        |
| AT2G20830 | na                                | transferases;fol | 2_8971456    | 14.84 | proximal promoter |
| AT2G20835 | na                                | unknown protei   | 2_8971456    | 14.84 | promoter          |
| AT1G64380 | na                                | encodes a mem    | 1_23893680   | 14.83 | proximal promoter |
| AT1G51805 | na                                | Leucine-rich re  | 1_19225888   | 14.78 | promoter          |
| AT4G37250 | na                                | Leucine-rich re  | 4_17530374   | 14.77 | five_prime_UTR    |
| AT1G30330 | AUXIN RESPONSE FACTOR 6 (ARF6)    | Encodes a merr   | 1_10693199   | 14.76 | proximal promoter |
| AT2G28340 | GATA TRANSCRIPTION FACTOR 13 (GA  | Encodes a merr   | 2_12108369   | 14.75 | intergenic        |
| AT5G67420 | LOB DOMAIN-CONTAINING PROTEIN 37  | Encodes a LOB    | 5_26901279   | 14.73 | intergenic        |
| AT1G04150 | na                                | C2 calcium/lipid | 1_1084701    | 14.72 | promoter          |

|           |                                    |                              |       |                   |
|-----------|------------------------------------|------------------------------|-------|-------------------|
| AT3G57800 | na                                 | basic helix-loop_3_21408549  | 14.72 | intron            |
| AT3G57810 | na                                 | Cysteine protei 3_21408549   | 14.72 | intergenic        |
| AT1G25450 | 3-KETOACYL-COA SYNTHASE 5 (KCS5)   | Encodes KCS5, 1_8938252      | 14.71 | downstream        |
| AT3G22104 | na                                 | Phototropic-res; 3_7788106   | 14.71 | proximal promoter |
| AT5G58620 | na                                 | zinc finger (CCC 5_23691946  | 14.71 | proximal promoter |
| AT5G19090 | na                                 | Heavy metal tra 5_6393378    | 14.68 | intergenic        |
| AT1G79060 | na                                 | unknown proteir 1_29741417   | 14.66 | promoter          |
| AT1G79070 | na                                 | SNARE-associ 1_29741417      | 14.66 | intergenic        |
| AT1G24170 | (LGT9)                             | Encodes a prot 1_8559044     | 14.65 | promoter          |
| AT3G60164 | na                                 | Pseudogene of 3_22231830     | 14.65 | downstream        |
| AT3G60170 | na                                 | transposable el 3_22231830   | 14.65 | proximal promoter |
| AT5G62100 | BCL-2-ASSOCIATED ATHANOGENE 2 (E   | A member of Ar 5_24939425    | 14.63 | proximal promoter |
| AT5G62090 | SEUSS-LIKE 2 (SLK2)                | SEUSS-like 2 (€ 5_24939425   | 14.63 | promoter          |
| AT2G02540 | HOMEOBOX PROTEIN 21 (HB21)         | Zinc finger hom 2_686050     | 14.62 | intergenic        |
| AT2G02550 | na                                 | PIN domain-like 2_686050     | 14.62 | proximal promoter |
| AT5G51790 | na                                 | basic helix-loop 5_21038189  | 14.61 | proximal promoter |
| AT5G49170 | na                                 | unknown proteir 5_19938811   | 14.6  | three_prime_UTR   |
| AT5G55920 | OLIGOCELLULA 2 (OLI2)              | Encodes a hom 5_22651216     | 14.58 | proximal promoter |
| AT2G14080 | na                                 | Disease resist 2_5925127     | 14.57 | promoter          |
| AT3G58620 | TETRATRICOPETIDE-REPEAT THIORE     | Encodes one of 3_21678922    | 14.57 | proximal promoter |
| AT3G05210 | (ERCC1)                            | encodes a hom 3_1479254      | 14.56 | promoter          |
| AT3G05200 | ARABIDOPSIS TOXICOS EN LEVADURA    | Encodes a puta 3_1479254     | 14.56 | intergenic        |
| AT1G25425 | CLAVATA3/ESR-RELATED 43 (CLE43)    | CLAVATA3/ESF 1_8924294       | 14.54 | intergenic        |
| AT4G18830 | OVATE FAMILY PROTEIN 5 (OFP5)      | Member of the € 4_10337186   | 14.52 | promoter          |
| AT5G65700 | BARELY ANY MERISTEM 1 (BAM1)       | Encodes a CLA 5_26285617     | 14.51 | downstream        |
| AT2G41870 | na                                 | Remorin family   2_17473205  | 14.51 | promoter          |
| AT1G76180 | EARLY RESPONSE TO DEHYDRATION      | Encodes a dehy 1_28586550    | 14.5  | downstream        |
| AT1G11330 | na                                 | S-locus lectin p 1_3810165   | 14.5  | intron            |
| AT1G76170 | na                                 | 2-thiocytidine tR 1_28586550 | 14.5  | promoter          |
| AT2G46270 | G-BOX BINDING FACTOR 3 (GBF3)      | encodes a bZIP 2_18998832    | 14.49 | proximal promoter |
| AT2G46260 | LIGHT-RESPONSE BTB 1 (LRB1)        | Involvement in ; 2_18998832  | 14.49 | downstream        |
| AT5G64780 | na                                 | Uncharacterise 5_25898291    | 14.48 | intergenic        |
| AT5G64770 | ROOT MERISTEM GROWTH FACTOR 9      | Encodes a root 5_25898291    | 14.48 | promoter          |
| AT1G06200 | na                                 | Peptidase S24/ 1_1897000     | 14.46 | promoter          |
| AT1G05136 | na                                 | unknown proteir 1_1479033    | 14.46 | exon              |
| AT1G05135 | na                                 | pseudogene of 1_1479033      | 14.46 | promoter          |
| AT1G79150 | na                                 | binding; FUNCT 1_29778309    | 14.45 | promoter          |
| AT1G79160 | na                                 | unknown proteir 1_29778309   | 14.45 | intergenic        |
| AT5G59790 | na                                 | CONTAINS Inte 5_24089417     | 14.44 | proximal promoter |
| AT5G66730 | INDETERMINATE DOMAIN 1 (IDD1)      | C2H2-like zinc f 5_26646187  | 14.43 | proximal promoter |
| AT5G66740 | na                                 | Protein of unkn 5_26646187   | 14.43 | proximal promoter |
| AT4G17680 | na                                 | SBP (S-ribonuci 4_9839987    | 14.42 | intergenic        |
| AT1G46264 | HEAT SHOCK TRANSCRIPTION FACTO     | Encodes SCHIZ 1_17219016     | 14.41 | intergenic        |
| AT1G75570 | na                                 | pre-tRNA; tRNA 1_28374904    | 14.4  | proximal promoter |
| AT5G14640 | SHAGGY-LIKE KINASE 13 (SK13)       | shaggy-like kine 5_4722415   | 14.4  | promoter          |
| AT5G25220 | KNOTTED1-LIKE HOMEOBOX GENE 3 (I   | A member of cle 5_8732093    | 14.39 | intergenic        |
| AT3G28910 | MYB DOMAIN PROTEIN 30 (MYB30)      | transcription fac 3_10908827 | 14.39 | proximal promoter |
| AT5G02960 | na                                 | Ribosomal prote 5_694809     | 14.39 | promoter          |
| AT5G02970 | na                                 | alpha/beta-Hydr 5_694809     | 14.39 | promoter          |
| AT2G32010 | CVP2 LIKE 1 (CVL1)                 | Encodes an ino 2_13628302    | 14.38 | intron            |
| AT5G67270 | END BINDING PROTEIN 1C (EB1C)      | encodes a hom 5_26846322     | 14.38 | intergenic        |
| AT5G62670 | H(+)-ATPASE 11 (HA11)              | H(+)-ATPase 11 5_25158765    | 14.38 | promoter          |
| AT5G13760 | na                                 | Plasma-membr 5_4441771       | 14.38 | promoter          |
| AT1G06000 | na                                 | encodes a flavo 1_1820250    | 14.38 | downstream        |
| AT1G06002 | na                                 | Potential natura 1_1820250   | 14.38 | proximal promoter |
| AT1G06010 | na                                 | unknown proteir 1_1820250    | 14.38 | proximal promoter |
| AT5G67290 | na                                 | FAD-dependent 5_26846322     | 14.38 | intergenic        |
| AT5G67280 | RECEPTOR-LIKE KINASE (RLK)         | receptor-like kin 5_26846322 | 14.38 | proximal promoter |
| AT5G13750 | ZINC INDUCED FACILITATOR-LIKE 1 (Z | zinc induced fac 5_4441771   | 14.38 | downstream        |
| AT3G52870 | na                                 | IQ calmodulin-b 3_19598734   | 14.37 | proximal promoter |
| AT4G37640 | CALCIUM ATPASE 2 (ACA2)            | Encodes a calr 4_17687756    | 14.36 | proximal promoter |
| AT5G06390 | FASCICLIN-LIKE ARABINOGLACTAN P    | FASCICLIN-like 5_1952363     | 14.36 | promoter          |
| AT1G78600 | LIGHT-REGULATED ZINC FINGER PRO    | light-regulated z 1_29566883 | 14.35 | promoter          |
| AT1G78590 | NAD(H) KINASE 3 (NADK3)            | Encodes a NAD 1_29566883     | 14.35 | intergenic        |
| AT4G16970 | na                                 | Protein kinase s 4_9556685   | 14.33 | proximal promoter |
| AT4G16980 | na                                 | arabinogalactar 4_9556685    | 14.33 | promoter          |
| AT4G36710 | (HAM4)                             | GRAS family tra 4_17304751   | 14.32 | proximal promoter |
| AT2G26250 | 3-KETOACYL-COA SYNTHASE 10 (KCS1   | epidermis-speci 2_11173272   | 14.32 | promoter          |
| AT5G11700 | na                                 | BEST Arabidop: 5_3771629     | 14.32 | promoter          |
| AT1G15800 | na                                 | unknown proteir 1_5442307    | 14.32 | intron            |
| AT1G15810 | na                                 | S15/NS1, RNA- 1_5442307      | 14.32 | proximal promoter |
| AT1G01490 | na                                 | Heavy metal tra 1_182401     | 14.3  | promoter          |
| AT1G72680 | CINNAMYL-ALCOHOL DEHYDROGENAS      | cinnamyl-alcohc 1_27359021   | 14.29 | downstream        |
| AT1G72670 | IQ-DOMAIN 8 (iqd8)                 | IQ-domain 8 (iq 1_27359021   | 14.29 | promoter          |
| AT1G18075 | MICRORNA159B (MIR159B)             | Encodes a micr 1_6219522     | 14.29 | proximal promoter |
| AT3G03210 | na                                 | unknown proteir 3_740590     | 14.28 | promoter          |
| AT3G60220 | TOXICOS EN LEVADURA 4 (ATL4)       | Encodes a puta 3_22255983    | 14.28 | five_prime_UTR    |
| AT2G33509 | na                                 | unknown proteir 2_14193948   | 14.27 | exon              |
| AT2G33510 | na                                 | unknown proteir 2_14193948   | 14.27 | promoter          |
| AT4G20930 | na                                 | 6-phosphogluc 4_11201327     | 14.27 | promoter          |
| AT2G41540 | (GPDHC1)                           | Encodes a prot 2_17325939    | 14.26 | promoter          |
| AT5G19095 | na                                 | pre-tRNA; tRNA 5_6395226     | 14.26 | intergenic        |
| AT2G41530 | S-FORMYLGLUTATHIONE HYDROLASE      | Encodes a prote 2_17325939   | 14.26 | promoter          |
| AT5G25280 | na                                 | serine-rich prote 5_8773613  | 14.22 | promoter          |
| AT5G25290 | na                                 | CONTAINS Inte 5_8773613      | 14.22 | intergenic        |
| AT1G70700 | (TIFY7)                            | JAZ9 is a protei 1_26657725  | 14.21 | intergenic        |
| AT1G70710 | GLYCOSYL HYDROLASE 9B1 (GH9B1)     | endo-1,4-beta-c 1_26657725   | 14.21 | intergenic        |
| AT5G15310 | MYB DOMAIN PROTEIN 16 (MYB16)      | Member of the F 5_4973055    | 14.2  | proximal promoter |
| AT1G16515 | na                                 | unknown proteir 1_5648174    | 14.19 | promoter          |
| AT1G16520 | na                                 | unknown proteir 1_5648174    | 14.19 | proximal promoter |
| AT1G30020 | na                                 | Protein of unkn 1_10517713   | 14.18 | proximal promoter |
| AT4G16500 | na                                 | Cystatin/monelli 4_9302113   | 14.16 | promoter          |
| AT4G16510 | na                                 | YbaK/aminoacy 4_9302113      | 14.16 | proximal promoter |
| AT3G05230 | na                                 | Signal peptidasi 3_1490556   | 14.16 | proximal promoter |

|           |                                    |                              |       |                   |
|-----------|------------------------------------|------------------------------|-------|-------------------|
| AT3G05220 | na                                 | Heavy metal tra 3_1490556    | 14.16 | exon              |
| AT5G67260 | CYCLIN D3;2 (CYCD3;2)              | Encode CYCD3 5_26835706      | 14.13 | promoter          |
| AT1G18710 | MYB DOMAIN PROTEIN 47 (MYB47)      | Member of the F 1_6453618    | 14.13 | intergenic        |
| AT1G10410 | na                                 | Protein of unknc 1_3421346   | 14.13 | proximal promoter |
| AT3G06160 | na                                 | AP2/B3-like trar 3_1864375   | 14.12 | intron            |
| AT3G07390 | AUXIN-INDUCED IN ROOT CULTURES 1   | isolated from dif 3_2365387  | 14.1  | five_prime_UTR    |
| AT3G07400 | na                                 | lipase class 3 fa 3_2365387  | 14.1  | proximal promoter |
| AT3G50750 | BES1/BZR1 HOMOLOG 1 (BEH1)         | BES1/BZR1 hor 3_18863746     | 14.07 | proximal promoter |
| AT3G50751 | na                                 | This gene encod 3_18863746   | 14.07 | exon              |
| AT5G45100 | BOI-RELATED GENE 1 (BRG1)          | Encodes one of 5_18213962    | 14.06 | intergenic        |
| AT3G46560 | (TIM9)                             | Encodes a sma1 3_17138011    | 14.05 | proximal promoter |
| AT5G20190 | na                                 | Tetratricopeptid 5_6813567   | 14.05 | proximal promoter |
| AT5G49525 | na                                 | unknown proteir 5_20098792   | 14.05 | proximal promoter |
| AT3G46540 | na                                 | ENTH/VHS fam 3_17138011      | 14.05 | proximal promoter |
| AT1G75180 | na                                 | Erythronate-4-p 1_28216969   | 14.05 | intron            |
| AT1G75190 | na                                 | unknown proteir 1_28216969   | 14.05 | proximal promoter |
| AT1G75200 | na                                 | flavodoxin famil 1_28216969  | 14.05 | intergenic        |
| AT5G67070 | RALF-LIKE 34 (RALFL34)             | Member of a div 5_26767936   | 14.05 | promoter          |
| AT3G46550 | SALT OVERLY SENSITIVE 5 (SOS5)     | Isolated in a scr 3_17138011 | 14.05 | promoter          |
| AT5G19730 | na                                 | Pectin lyase-like 5_6669254  | 14.03 | proximal promoter |
| AT5G19729 | na                                 | This gene encod 5_6669254    | 14.03 | intergenic        |
| AT1G01550 | BYPASS 1 (BPS1)                    | Encodes a prote 1_199595     | 14.02 | promoter          |
| AT2G45830 | DOWNSTREAM TARGET OF AGL15 2 (D    | downstream tar 2_18866959    | 14.02 | exon              |
| AT1G01560 | MAP KINASE 11 (MPK11)              | member of MAF 1_199595       | 14.02 | proximal promoter |
| AT1G01540 | na                                 | Protein kinase s 1_199595    | 14.02 | intergenic        |
| AT2G33040 | GAMMA SUBUNIT OF MT ATP SYNTHAS    | gamma subunit 2_14021687     | 14.01 | proximal promoter |
| AT2G33050 | RECEPTOR LIKE PROTEIN 26 (RLP26)   | receptor like prc 2_14021687 | 14.01 | promoter          |
| AT3G48360 | BTB AND TAZ DOMAIN PROTEIN 2 (bt2) | encodes a prote 3_17911785   | 14    | proximal promoter |
| AT3G48350 | CYSTEINE ENDOPEPTIDASE 3 (CEP3)    | Cysteine proteir 3_17911785  | 14    | intergenic        |
| AT3G23085 | na                                 | transposable elk 3_8213567   | 13.99 | proximal promoter |
| AT3G24490 | na                                 | Alcohol dehydr 3_8908670     | 13.99 | proximal promoter |
| AT2G44920 | na                                 | Tetratricopeptid 2_18523541  | 13.98 | proximal promoter |
| AT5G04220 | (SYTC)                             | SYTC; FUNCTII 5_1159523      | 13.97 | proximal promoter |
| AT5G46720 | na                                 | AIG2-like (aviru 5_18958099  | 13.97 | proximal promoter |
| AT5G51460 | (ATTPPA)                           | homologous to 1 5_20900531   | 13.95 | promoter          |
| AT5G08130 | (BIM1)                             | Arabidopsis thai 5_2609196   | 13.95 | intron            |
| AT3G03860 | APR-LIKE 5 (APRL5)                 | Encodes a prote 3_995114     | 13.94 | intergenic        |
| AT3G03870 | na                                 | unknown proteir 3_995114     | 13.94 | promoter          |
| AT3G01140 | MYB DOMAIN PROTEIN 106 (MYB106)    | Encodes a MIX 3_49819        | 13.93 | proximal promoter |
| AT3G52060 | na                                 | Core-2/l-branch 3_19312503   | 13.93 | promoter          |
| AT3G52070 | na                                 | unknown proteir 3_19312503   | 13.93 | promoter          |
| AT3G52072 | na                                 | Potential natura 3_19312503  | 13.93 | downstream        |
| AT5G27345 | na                                 | transposable elk 5_9645281   | 13.93 | proximal promoter |
| AT1G14280 | PHYTOCHROME KINASE SUBSTRATE 2     | Encodes phytoc 1_4879554     | 13.93 | intergenic        |
| AT3G01150 | POLYPYRIMIDINE TRACT-BINDING PRO   | Encodes one of 3_49819       | 13.93 | proximal promoter |
| AT3G23727 | SCR-LIKE 12 (SCRL12)               | Encodes a merr 3_8546934     | 13.93 | intergenic        |
| AT1G14290 | SPHINGOID BASE HYDROXYLASE 2 (SE   | Encodes one of 1_4879554     | 13.93 | intergenic        |
| AT5G63810 | BETA-GALACTOSIDASE 10 (BGAL10)     | member of Glyc 5_25536127    | 13.92 | proximal promoter |
| AT5G63800 | MUCILAGE-MODIFIED 2 (MUM2)         | Involved in muc 5_25536127   | 13.92 | intergenic        |
| AT2G46970 | PHYTOCHROME INTERACTING FACTOI     | encodes a nove 2_19299024    | 13.92 | proximal promoter |
| AT5G23260 | TRANSPARENT TESTA16 (TT16)         | Encodes a MAC 5_7833431      | 13.89 | proximal promoter |
| AT4G24240 | WRKY DNA-BINDING PROTEIN 7 (WRK)   | Encodes a Ca-c 4_12573492    | 13.88 | three_prime_UTR   |
| AT1G25570 | na                                 | Di-glucose bind 1_8996335    | 13.87 | proximal promoter |
| AT5G12040 | na                                 | Nitrilase/cyanid 5_3888629   | 13.86 | intergenic        |
| AT5G12043 | na                                 | This gene encod 5_3888629    | 13.86 | downstream        |
| AT5G12050 | na                                 | unknown proteir 5_3888629    | 13.86 | proximal promoter |
| AT4G23190 | CYSTEINE-RICH RLK (RECEPTOR-LIKE   | Encodes putativ 4_12143941   | 13.85 | promoter          |
| AT4G23205 | na                                 | Unknown gene 4_12143941      | 13.85 | intergenic        |
| AT1G28281 | na                                 | unknown proteir 1_9887651    | 13.84 | exon              |
| AT1G28280 | na                                 | VQ motif-contai 1_9887651    | 13.84 | promoter          |
| AT4G28230 | na                                 | unknown proteir 4_13998495   | 13.84 | proximal promoter |
| AT4G28240 | na                                 | Wound-respons 4_13998495     | 13.84 | promoter          |
| AT2G18780 | na                                 | F-box and asso 2_8139645     | 13.83 | proximal promoter |
| AT3G27210 | na                                 | unknown proteir 3_10047464   | 13.83 | promoter          |
| AT2G18790 | PHYTOCHROME B (PHYB)               | Red/far-red pho 2_8139645    | 13.83 | promoter          |
| AT3G02468 | CONSERVED PEPTIDE UPSTREAM OPE     | Upstream open 3_508613       | 13.82 | promoter          |
| AT3G02460 | na                                 | Ypt/Rab-GAP di 3_508613      | 13.82 | downstream        |
| AT3G03702 | na                                 | Potential natura 3_915608    | 13.82 | intergenic        |
| AT3G02470 | S-ADENOSYLMETHIONINE DECARBOX      | Encodes a S-ac 3_508613      | 13.82 | promoter          |
| AT3G03690 | UNFERTILIZED EMBRYO SAC 7 (UNE7)   | unfertilized emb 3_915608    | 13.82 | proximal promoter |
| AT5G07180 | ERECTA-LIKE 2 (ERL2)               | Encodes a rece 5_2233879     | 13.81 | promoter          |
| AT4G38470 | SERINE/THREONINE/TYROSINE KINASE   | ACT-like proteir 4_17998762  | 13.81 | proximal promoter |
| AT1G18890 | CALCIUM-DEPENDENT PROTEIN KINASE   | encodes a calci 1_6528507    | 13.79 | proximal promoter |
| AT1G18900 | na                                 | Pentatricopeptic 1_6528507   | 13.79 | promoter          |
| AT1G77410 | BETA-GALACTOSIDASE 16 (BGAL16)     | beta-galactosid 1_29093541   | 13.78 | promoter          |
| AT1G66200 | GLUTAMINE SYNTHASE CLONE F11 (G    | encodes a cytos 1_24654082   | 13.78 | intergenic        |
| AT1G77420 | na                                 | alpha/beta-Hydr 1_29093541   | 13.78 | five_prime_UTR    |
| AT1G66190 | na                                 | unknown proteir 1_24654082   | 13.78 | promoter          |
| AT1G75700 | HVA22-LIKE PROTEIN G (HVA22G)      | HVA22-like prot 1_28425785   | 13.77 | intergenic        |
| AT4G35100 | PLASMA MEMBRANE INTRINSIC PROTE    | a member of the 4_16711084   | 13.77 | intergenic        |
| AT4G03965 | na                                 | RING/U-box suj 4_1890262     | 13.76 | three_prime_UTR   |
| AT4G03960 | PLANT AND FUNGI ATYPICAL DUAL-SPI  | Encodes an aty 4_1890262     | 13.76 | intergenic        |
| AT1G74448 | na                                 | unknown proteir 1_27982242   | 13.75 | exon              |
| AT1G74450 | na                                 | FUNCTIONS IN 1_27982242      | 13.75 | promoter          |
| AT1G74453 | na                                 | snoRNA; snoRN 1_27982242     | 13.75 | intergenic        |
| AT1G74456 | na                                 | snoRNA; snoRN 1_27982242     | 13.75 | intergenic        |
| AT5G54930 | na                                 | AT hook motif-c 5_22309630   | 13.75 | proximal promoter |
| AT5G54940 | na                                 | Translation initi 5_22309630 | 13.75 | promoter          |
| AT5G54950 | na                                 | Aconitase famil 5_22309630   | 13.75 | downstream        |
| AT4G25650 | ACD1-LIKE (ACD1-LIKE)              | Similar to ACD1 4_13080518   | 13.73 | intergenic        |
| AT4G25640 | DETOXIFYING EFFLUX CARRIER 35 (DT  | Encodes a multi 4_13080518   | 13.73 | proximal promoter |
| AT3G13790 | (ATBFRUCT1)                        | Encodes a prote 3_4532432    | 13.71 | intergenic        |
| AT4G37790 | (HAT22)                            | Encodes homec 4_17770783     | 13.71 | intergenic        |
| AT3G25720 | na                                 | RNA-directed D 3_9383166     | 13.7  | intergenic        |

|           |                                   |                                |       |                   |
|-----------|-----------------------------------|--------------------------------|-------|-------------------|
| AT1G21000 | na                                | PLATZ transcript 1_7340716     | 13.68 | intergenic        |
| AT5G03350 | na                                | Legume lectin fr 5_816925      | 13.67 | promoter          |
| AT5G03360 | na                                | DC1 domain-co 5_816925         | 13.67 | proximal promoter |
| AT2G02930 | GLUTATHIONE S-TRANSFERASE F3 (G   | Encodes glutath 2_854663       | 13.66 | proximal promoter |
| AT2G02950 | PHYTOCHROME KINASE SUBSTRATE 1    | Encodes a basi 2_854663        | 13.66 | intergenic        |
| AT3G55560 | AT-HOOK PROTEIN OF GA FEEDBACK ;  | AT-hook protein 3_20606628     | 13.62 | promoter          |
| AT1G19110 | na                                | inter-alpha-tryps 1_6601874    | 13.62 | promoter          |
| AT1G12440 | na                                | A20/AN1-like zif 1_4243264     | 13.62 | promoter          |
| AT1G12450 | na                                | SNARE associa 1_4243264        | 13.62 | proximal promoter |
| AT4G30650 | na                                | Low temperatur 4_14955253      | 13.61 | intergenic        |
| AT4G30660 | na                                | Low temperatur 4_14955253      | 13.61 | promoter          |
| AT2G30600 | na                                | BTB/POZ doma 2_13036943        | 13.6  | intron            |
| AT5G04820 | OVATE FAMILY PROTEIN 13 (OPF13)   | ovate family pro 5_1397816     | 13.6  | proximal promoter |
| AT4G26690 | SHAVEN 3 (SHV3)                   | Glycerophosph 4_13461049       | 13.6  | proximal promoter |
| AT5G19110 | na                                | Eukaryotic aspa 5_6414366      | 13.59 | proximal promoter |
| AT5G19120 | na                                | Eukaryotic aspa 5_6414366      | 13.59 | promoter          |
| AT5G19130 | na                                | GPI transamida 5_6414366       | 13.59 | intergenic        |
| AT2G02070 | INDETERMINATE(ID)-DOMAIN 5 (IDD5) | indeterminate(IL 2_509851      | 13.58 | intergenic        |
| AT5G47060 | na                                | Protein of unkn 5_19115671     | 13.56 | proximal promoter |
| AT5G11230 | na                                | Nucleotide-sug 5_3579913       | 13.55 | proximal promoter |
| AT1G18310 | na                                | glycosyl hydrola 1_6299115     | 13.54 | intergenic        |
| AT1G18300 | NUDIX HYDROLASE HOMOLOG 4 (NUD    | nudix hydrolase 1_6299115      | 13.54 | proximal promoter |
| AT3G49260 | IQ-DOMAIN 21 (iqd21)              | IQ-domain 21 (i 3_18262385     | 13.53 | promoter          |
| AT5G67020 | na                                | unknown proteir 5_26752854     | 13.53 | intergenic        |
| AT4G36170 | na                                | unknown proteir 4_17119662     | 13.52 | exon              |
| AT4G36180 | na                                | Leucine-rich rec 4_17119662    | 13.52 | intergenic        |
| AT2G33860 | ETTIN (ETT)                       | ettin (ett) mutati 2_14331435  | 13.51 | proximal promoter |
| AT3G16050 | PYRIDOXINE BIOSYNTHESIS 1.2 (PDX1 | Encodes a prote 3_5445495      | 13.51 | promoter          |
| AT1G14720 | XYLOGLUCAN ENDOTRANGLUCOSYL       | member of Glyc 1_5070698       | 13.51 | proximal promoter |
| AT1G08920 | ERD (EARLY RESPONSE TO DEHYDRAT   | Encodes ESL1_ 1_2862726        | 13.5  | intergenic        |
| AT1G49560 | na                                | Homeodomain-1 1_18342339       | 13.5  | promoter          |
| AT1G08910 | na                                | FUNCTIONS IN 1_2862726         | 13.5  | intergenic        |
| AT2G26530 | (AR781)                           | unknown funcic 2_11284844      | 13.48 | proximal promoter |
| AT1G80420 | (ATXRCC1)                         | ATXRCC1; FUN 1_30239120        | 13.48 | proximal promoter |
| AT1G80430 | na                                | pre-tRNA; tRNA 1_30239120      | 13.48 | intergenic        |
| AT1G80440 | na                                | Galactose oxid 1_30239120      | 13.48 | proximal promoter |
| AT1G80450 | na                                | VQ motif-contai 1_30239120     | 13.48 | intergenic        |
| AT1G80370 | CYCLIN A2;4 (CYCA2;4)             | Encodes a A2-t 1_30217121      | 13.47 | intergenic        |
| AT1G80380 | na                                | encodes a glyce 1_30217121     | 13.47 | intron            |
| AT5G15948 | CONSERVED PEPTIDE UPSTREAM OPE    | Upstream open 5_5205321        | 13.46 | proximal promoter |
| AT5G15950 | na                                | Adenosylmethic 5_5205321       | 13.46 | proximal promoter |
| AT1G59910 | na                                | Actin-binding Ff 1_22057340    | 13.45 | promoter          |
| AT5G39070 | na                                | transposable elk 5_15641163    | 13.42 | promoter          |
| AT5G39080 | na                                | HXXXD-type ac 5_15641163       | 13.42 | promoter          |
| AT5G39090 | na                                | HXXXD-type ac 5_15641163       | 13.42 | proximal promoter |
| AT2G47370 | na                                | Calcium-depend 2_19440504      | 13.42 | promoter          |
| AT3G47080 | na                                | Tetratricopeptid 3_17340681    | 13.38 | promoter          |
| AT4G22350 | na                                | Ubiquitin C-terr 4_11807465    | 13.38 | promoter          |
| AT4G22360 | na                                | SWIB complex 1 4_11807465      | 13.38 | promoter          |
| AT2G26730 | na                                | Leucine-rich ref 2_11388427    | 13.38 | five_prime_UTR    |
| AT2G39770 | CYTOKINESIS DEFECTIVE 1 (CYT1)    | Encodes a GDF 2_16587086       | 13.37 | proximal promoter |
| AT5G48790 | na                                | FUNCTIONS IN 5_19782634        | 13.37 | proximal promoter |
| AT1G10030 | HOMOLOG OF YEAST ERGOSTEROL28     | homolog of yeas 1_3272626      | 13.33 | proximal promoter |
| AT1G10020 | na                                | Protein of unkn 1_3272626      | 13.33 | proximal promoter |
| AT1G18670 | IMPAIRED IN BABA-INDUCED STERILIT | Encodes a cycli 1_6426801      | 13.32 | downstream        |
| AT1G76490 | HYDROXY METHYLGLUTARYL COA REI    | Encodes a 3-hy 1_28695866      | 13.29 | exon              |
| AT5G46880 | HOMEBOX-7 (HB-7)                  | homeobox-7 (H 5_19030689       | 13.27 | proximal promoter |
| AT4G38620 | MYB DOMAIN PROTEIN 4 (MYB4)       | Encodes a R2R 4_18055572       | 13.26 | intergenic        |
| AT4G38630 | REGULATORY PARTICLE NON-ATPASE    | Regulatory parti 4_18055572    | 13.26 | intergenic        |
| AT2G45310 | UDP-D-GLUCURONATE 4-EPIMERASE 4   | UDP-D-glucuroi 2_18681686      | 13.26 | promoter          |
| AT4G14490 | na                                | SMAD/FHA don 4_8333740         | 13.25 | promoter          |
| AT4G14500 | na                                | Polyketide cycle 4_8333740     | 13.25 | promoter          |
| AT5G09620 | na                                | Octicosapeptide 5_2985574      | 13.25 | promoter          |
| AT2G23770 | LYSM-CONTAINING RECEPTOR-LIKE Kf  | protein kinase fr 2_10119684   | 13.24 | intergenic        |
| AT1G72680 | CINNAMYL-ALCOHOL DEHYDROGENAS     | cinnamyl-alcohc 1_27363539     | 13.23 | proximal promoter |
| AT1G23080 | PIN-FORMED 7 (PIN7)               | Encodes a nove 1_8181446       | 13.22 | intron            |
| AT1G75490 | na                                | encodes a mem 1_28335225       | 13.21 | promoter          |
| AT1G75500 | WALLS ARE THIN 1 (WAT1)           | An Arabidopsis 1_28335225      | 13.21 | intergenic        |
| AT1G78790 | na                                | unknown proteir 1_29625401     | 13.2  | promoter          |
| AT1G78800 | na                                | UDP-Glycosyltr: 1_29625401     | 13.2  | intergenic        |
| AT3G13320 | CATION EXCHANGER 2 (CAX2)         | low affinity calci 3_4312394   | 13.19 | proximal promoter |
| AT3G13310 | na                                | Chaperone Dna 3_4312394        | 13.19 | proximal promoter |
| AT1G09070 | SOYBEAN GENE REGULATED BY COLC    | SRC2 specific 1_2926749        | 13.19 | proximal promoter |
| AT3G13300 | VARICOSE (VCS)                    | Encodes VCS ( 3_4312394        | 13.19 | intergenic        |
| AT4G37690 | na                                | Galactosyl trans 4_17709293    | 13.17 | exon              |
| AT5G63790 | NAC DOMAIN CONTAINING PROTEIN 1C  | Encodes a merr 5_25528201      | 13.17 | promoter          |
| AT5G63780 | SHOOT APICAL MERISTEM ARREST 1 (  | Encodes SHA1 5_25528201        | 13.17 | intergenic        |
| AT1G71960 | ATP-BINDING CASSETTE G25 (ABCG25) | Encodes a plasi 1_27088208     | 13.16 | five_prime_UTR    |
| AT1G72970 | HOTHEAD (HTH)                     | Originally identifi 1_27451206 | 13.16 | proximal promoter |
| AT1G20515 | na                                | Potential natura 1_7106026     | 13.16 | promoter          |
| AT1G20510 | OPC-8:0 COA LIGASE1 (OPCL1)       | OPC-8:0 CoA li 1_7106026       | 13.16 | promoter          |
| AT1G17200 | na                                | Uncharacterisek 1_5877375      | 13.15 | proximal promoter |
| AT1G69320 | CLAVATA3/ESR-RELATED 10 (CLE10)   | Member of a lar 1_26062629     | 13.13 | downstream        |
| AT1G20100 | na                                | unknown proteir 1_6971145      | 13.13 | promoter          |
| AT1G20110 | na                                | RING/FYVE/PH 1_6971145         | 13.13 | promoter          |
| AT2G34710 | PHABULOSA (PHB)                   | Dominant PHB 1_2_14645210      | 13.13 | proximal promoter |
| AT4G35470 | PLANT INTRACELLULAR RAS GROUP-F   | Encodes PIRL4 4_16846066       | 13.13 | promoter          |
| AT1G20090 | RHO-RELATED PROTEIN FROM PLANT;   | Member of the F 1_6971145      | 13.13 | intergenic        |
| AT3G50450 | HOMOLOG OF RPW8 1 (HR1)           | Homolog of RP1 3_18721686      | 13.12 | proximal promoter |
| AT3G53420 | PLASMA MEMBRANE INTRINSIC PROTE   | a member of the 3_19807224     | 13.12 | proximal promoter |
| AT4G38760 | na                                | Protein of unkn 4_18083173     | 13.11 | intergenic        |
| AT4G38730 | na                                | Protein of unkn 4_18083173     | 13.11 | proximal promoter |
| AT1G69870 | NITRATE TRANSPORTER 1.7 (NRT1.7)  | Encodes a low 1_26313328       | 13.11 | proximal promoter |
| AT4G38740 | ROTAMASE CYP 1 (ROC1)             | Encodes cytosk 4_18083173      | 13.11 | downstream        |

|           |                                               |                   |            |       |                   |
|-----------|-----------------------------------------------|-------------------|------------|-------|-------------------|
| AT5G08335 | (ATSTE14B)                                    | Encodes an isc    | 5_2680661  | 13.1  | proximal promoter |
| AT1G10370 | EARLY-RESPONSIVE TO DEHYDRATION               | Encodes GSTU      | 1_3397025  | 13.1  | downstream        |
| AT1G10360 | GLUTATHIONE S-TRANSFERASE TAU 1               | Encodes glutath   | 1_3397025  | 13.1  | promoter          |
| AT5G08330 | TCP DOMAIN PROTEIN 11 (TCP11)                 | TCP family tran   | 5_2680661  | 13.1  | promoter          |
| AT2G34630 | GERANYL DIPHOSPHATE SYNTHASE 1                | Encodes a gera    | 2_14578262 | 13.09 | promoter          |
| AT1G55450 | na                                            | S-adenosyl-L-m    | 1_20707005 | 13.09 | promoter          |
| AT1G55460 | na                                            | DNA/RNA-bind      | 1_20707005 | 13.09 | promoter          |
| AT2G34620 | na                                            | Mitochondrial tr  | 2_14578262 | 13.09 | three_prime_UTR   |
| AT5G66650 | na                                            | Protein of unkn   | 5_26604968 | 13.08 | proximal promoter |
| AT5G57510 | na                                            | unknown protei    | 5_23288656 | 13.07 | intergenic        |
| AT2G01420 | PIN-FORMED 4 (PIN4)                           | Encodes a puta    | 2_181165   | 13.07 | intron            |
| AT4G22592 | CONSERVED PEPTIDE UPSTREAM OPEN READING FRAME | Upstream open     | 4_11897191 | 13.05 | proximal promoter |
| AT4G22850 | na                                            | SNARE associ      | 4_11996406 | 13.05 | downstream        |
| AT4G22860 | na                                            | Cell cycle regul  | 4_11996406 | 13.05 | proximal promoter |
| AT4G22590 | TREHALOSE-6-PHOSPHATE PHOSPHATASE 1           | Haloacid dehalc   | 4_11897191 | 13.05 | proximal promoter |
| AT2G22790 | na                                            | unknown protei    | 2_9696737  | 13.04 | exon              |
| AT2G22795 | na                                            | unknown protei    | 2_9696737  | 13.04 | intergenic        |
| AT5G06980 | na                                            | unknown protei    | 5_2167250  | 13.04 | promoter          |
| AT5G07590 | na                                            | Transducin/WD     | 5_2404074  | 13.04 | promoter          |
| AT4G38430 | RHO GUANYL-NUCLEOTIDE EXCHANGE FACTOR 1       | Member of the f   | 4_17986352 | 13.04 | promoter          |
| AT4G15630 | na                                            | Uncharacterise    | 4_8918902  | 13.02 | downstream        |
| AT4G15640 | na                                            | unknown protei    | 4_8918902  | 13.02 | downstream        |
| AT5G01750 | na                                            | Protein of unkn   | 5_291498   | 13    | downstream        |
| AT5G01760 | na                                            | ENTH/VHS/GA'      | 5_291498   | 13    | promoter          |
| AT1G17840 | ATP-BINDING CASSETTE G11 (ABCG11)             | Encodes a plasi   | 1_6142423  | 12.98 | promoter          |
| AT4G27765 | MICRORNA828A (MIR828A)                        | Encodes a micr    | 4_13847222 | 12.98 | downstream        |
| AT3G45780 | PHOTOTROPIN 1 (PHOT1)                         | Blue-light photo  | 3_16817634 | 12.95 | intron            |
| AT5G54960 | PYRUVATE DECARBOXYLASE-2 (PDC2)               | pyruvate decar    | 5_22312985 | 12.94 | promoter          |
| AT5G13110 | GLUCOSE-6-PHOSPHATE DEHYDROGENASE 1           | Encodes a plasi   | 5_4156483  | 12.93 | proximal promoter |
| AT5G13090 | na                                            | unknown protei    | 5_4156483  | 12.93 | proximal promoter |
| AT5G13100 | na                                            | unknown protei    | 5_4156483  | 12.93 | promoter          |
| AT4G37270 | HEAVY METAL ATPASE 1 (HMA1)                   | Encodes a P1B     | 4_17539917 | 12.92 | intergenic        |
| AT4G37260 | MYB DOMAIN PROTEIN 73 (MYB73)                 | Member of the f   | 4_17539917 | 12.92 | proximal promoter |
| AT1G05710 | na                                            | basic helix-loop  | 1_1713579  | 12.92 | proximal promoter |
| AT3G17820 | GLUTAMINE SYNTHETASE 1.3 (GLN1.3)             | encodes a cytos   | 3_6099885  | 12.91 | intergenic        |
| AT3G17830 | na                                            | Molecular chap    | 3_6099885  | 12.91 | proximal promoter |
| AT2G32090 | na                                            | Lactoylglutathio  | 2_13645825 | 12.91 | intron            |
| AT2G32100 | OVATE FAMILY PROTEIN 16 (OFP16)               | ovate family pro  | 2_13645825 | 12.91 | proximal promoter |
| AT5G62470 | MYB DOMAIN PROTEIN 96 (MYB96)                 | Encodes a R2R     | 5_25078229 | 12.9  | intergenic        |
| AT5G62460 | na                                            | RING/FYVE/PH      | 5_25078229 | 12.9  | intergenic        |
| AT4G37070 | (PLP1)                                        | Patatin-related   | 4_17469258 | 12.89 | proximal promoter |
| AT3G19820 | DWARF 1 (DWF1)                                | Involved in the   | 3_6884410  | 12.89 | proximal promoter |
| AT1G10090 | na                                            | Early-responsiv   | 1_3296435  | 12.89 | promoter          |
| AT5G19180 | E1 C-TERMINAL RELATED 1 (ECR1)                | Encodes a sub     | 5_6457141  | 12.88 | intergenic        |
| AT3G27050 | na                                            | unknown protei    | 3_9981436  | 12.88 | proximal promoter |
| AT3G45050 | na                                            | unknown protei    | 3_16475821 | 12.88 | promoter          |
| AT3G45040 | na                                            | Encodes a puta    | 3_16475821 | 12.88 | promoter          |
| AT5G19190 | na                                            | unknown protei    | 5_6457141  | 12.88 | promoter          |
| AT5G19200 | TSC10B (TSC10B)                               | Encodes one of    | 5_6457141  | 12.88 | proximal promoter |
| AT3G27060 | TSO MEANING 'UGLY' IN CHINESE 2 (TSC10A)      | Encodes one of    | 3_9981436  | 12.88 | promoter          |
| AT1G28010 | ATP-BINDING CASSETTE B14 (ABCB14)             | Encodes an AT     | 1_9762341  | 12.87 | proximal promoter |
| AT1G28007 | na                                            | unknown protei    | 1_9762341  | 12.87 | downstream        |
| AT2G45430 | AT-HOOK MOTIF NUCLEAR-LOCALIZED PROTEIN 1     | Encodes a nucl    | 2_18725793 | 12.86 | proximal promoter |
| AT2G35950 | EMBRYO SAC DEVELOPMENT ARREST 1               | embryo sac dev    | 2_15099438 | 12.85 | intergenic        |
| AT5G01950 | na                                            | Leucine-rich re   | 5_370154   | 12.85 | five_prime_UTR    |
| AT5G01960 | na                                            | RING/U-box su     | 5_370154   | 12.85 | promoter          |
| AT1G69930 | GLUTATHIONE S-TRANSFERASE TAU 1               | Encodes glutath   | 1_26337411 | 12.84 | downstream        |
| AT1G32230 | RADICAL-INDUCED CELL DEATH1 (RCD1)            | Encodes a prot    | 1_11620336 | 12.84 | intergenic        |
| AT3G52850 | VACUOLAR SORTING RECEPTOR HOMOLOG 1           | Encodes the Va    | 3_19587539 | 12.83 | promoter          |
| AT4G19020 | CHROMOMETHYLASE 2 (CMT2)                      | chromomethyla     | 4_10414422 | 12.82 | promoter          |
| AT4G19010 | na                                            | AMP-dependen      | 4_10414422 | 12.82 | promoter          |
| AT4G37250 | na                                            | Leucine-rich re   | 4_17535110 | 12.82 | intergenic        |
| AT5G05140 | na                                            | Transcription el  | 5_1518165  | 12.82 | proximal promoter |
| AT1G67350 | na                                            | unknown protei    | 1_25234863 | 12.81 | promoter          |
| AT3G17185 | TRANS-ACTING SIRNA3 (TAS3)                    | Encodes a trans   | 3_5862606  | 12.81 | downstream        |
| AT1G49200 | na                                            | RING/U-box su     | 1_18198019 | 12.79 | promoter          |
| AT5G63520 | na                                            | CONTAINS Inte     | 5_25430699 | 12.79 | proximal promoter |
| AT4G12420 | (SKU5)                                        | Encodes a prot    | 4_7355324  | 12.78 | proximal promoter |
| AT4G32160 | na                                            | Phox (PX) dom     | 4_15528664 | 12.78 | promoter          |
| AT2G02700 | na                                            | Cysteine/Histid   | 2_758017   | 12.78 | downstream        |
| AT2G02710 | PAS/LOV PROTEIN B (PLPB)                      | Encodes a puta    | 2_758017   | 12.78 | intergenic        |
| AT4G32150 | VESICLE-ASSOCIATED MEMBRANE PROTEIN 7A        | AtVAMP711 is      | 4_15528664 | 12.78 | proximal promoter |
| AT1G22767 | na                                            | unknown protei    | 1_8060883  | 12.76 | downstream        |
| AT2G44120 | na                                            | Ribosomal prot    | 2_18252677 | 12.75 | proximal promoter |
| AT2G44130 | na                                            | Galactose oxid    | 2_18252677 | 12.75 | proximal promoter |
| AT2G44140 | na                                            | Peptidase fami    | 2_18252677 | 12.75 | intergenic        |
| AT5G65470 | na                                            | O-fucosyltrans    | 5_26172047 | 12.75 | promoter          |
| AT1G76620 | na                                            | Protein of unkn   | 1_28755050 | 12.74 | proximal promoter |
| AT5G14710 | na                                            | CONTAINS Inte     | 5_4746051  | 12.74 | promoter          |
| AT3G48690 | (CXE12)                                       | Encodes a prot    | 3_18038273 | 12.73 | promoter          |
| AT1G25220 | ANTHRANILATE SYNTHASE BETA SUBUNIT 1          | Catalyzes the f   | 1_8839661  | 12.73 | promoter          |
| AT3G23160 | na                                            | Protein of unkn   | 3_8259623  | 12.73 | downstream        |
| AT5G66080 | na                                            | Protein phosph    | 5_26425472 | 12.72 | promoter          |
| AT5G66090 | na                                            | unknown protei    | 5_26425472 | 12.72 | promoter          |
| AT5G11090 | na                                            | serine-rich prote | 5_3529607  | 12.72 | intergenic        |
| AT2G17470 | ALUMINIUM ACTIVATED MALATE TRANSPORTER 1      | Encodess ALM'     | 2_7588262  | 12.71 | promoter          |
| AT2G46530 | AUXIN RESPONSE FACTOR 11 (ARF11)              | auxin response    | 2_19101070 | 12.71 | intergenic        |
| AT2G46520 | na                                            | cellular apopto   | 2_19101070 | 12.71 | intergenic        |
| AT2G33400 | na                                            | unknown protei    | 2_14154592 | 12.7  | promoter          |
| AT1G75220 | ERD6-LIKE 6 (ERDL6)                           | Encodes a vacc    | 1_28233750 | 12.67 | proximal promoter |
| AT1G75230 | na                                            | DNA glycosylas    | 1_28233750 | 12.67 | proximal promoter |
| AT1G77200 | na                                            | encodes a mem     | 1_29005249 | 12.67 | promoter          |
| AT2G42620 | MORE AXILLARY BRANCHES 2 (MAX2)               | The mutations     | 2_17752363 | 12.62 | intergenic        |
| AT5G02260 | EXPANSIN A9 (EXPA9)                           | member of Alph    | 5_461522   | 12.61 | proximal promoter |

|           |                                    |                               |       |                   |
|-----------|------------------------------------|-------------------------------|-------|-------------------|
| AT4G15233 | ATP-BINDING CASSETTE G42 (ABCG42)  | ABC-2 and Plar 4_8687760      | 12.59 | proximal promoter |
| AT1G02210 | na                                 | NAC (No Apical 1_426662       | 12.58 | intergenic        |
| AT4G11230 | na                                 | Riboflavin synth 4_6839856    | 12.55 | intergenic        |
| AT4G11220 | VIRB2-INTERACTING PROTEIN 2 (BTI2) | VIRB2-interactir 4_6839856    | 12.55 | promoter          |
| AT5G20110 | na                                 | Dynein light cha 5_6791960    | 12.54 | intron            |
| AT3G02130 | RECEPTOR-LIKE PROTEIN KINASE 2 (R  | Encodes a rece 3_387499       | 12.54 | intergenic        |
| AT3G02140 | TWO OR MORE ABRES-CONTAINING G     | Encodes a prot 3_387499       | 12.54 | proximal promoter |
| AT1G70610 | ATP-BINDING CASSETTE B26 (ABCB26)  | member of TAP 1_26621868      | 12.53 | promoter          |
| AT1G70600 | na                                 | Ribosomal prote 1_26621868    | 12.53 | promoter          |
| AT5G40900 | na                                 | Nucleotide-diph 5_16388721    | 12.52 | intergenic        |
| AT5G08530 | 51 KDA SUBUNIT OF COMPLEX I (CI51) | 51 kDa subunit 5_2758971      | 12.5  | intergenic        |
| AT5G09810 | ACTIN 7 (ACT7)                     | Member of Actir 5_3051924     | 12.5  | promoter          |
| AT1G14440 | HOMEODOMAIN PROTEIN 31 (HB31)      | homeobox prote 1_4941390      | 12.5  | promoter          |
| AT5G13220 | JASMONATE-ZIM-DOMAIN PROTEIN 10    | Plants overexpr 5_4217397     | 12.5  | proximal promoter |
| AT5G08520 | na                                 | Duplicated hom 5_2758971      | 12.5  | proximal promoter |
| AT4G16430 | na                                 | basic helix-loop 4_9267446    | 12.49 | five_prime_UTR    |
| AT5G07030 | na                                 | Eukaryotic aspa 5_2184727     | 12.48 | intron            |
| AT1G75710 | na                                 | C2H2-like zinc f 1_28430315   | 12.48 | intron            |
| AT5G36250 | PP2C74, PROTEIN PHOSPHATASE 2C 7   | Encodes a myri 5_14281583     | 12.48 | proximal promoter |
| AT5G59820 | RESPONSIVE TO HIGH LIGHT 41 (RHL4) | Encodes a zinc 5_24102895     | 12.45 | promoter          |
| AT2G16280 | 3-KETOACYL-COA SYNTHASE 9 (KCS9)   | Encodes KCS9, 2_7050710       | 12.44 | promoter          |
| AT3G29575 | ABI FIVE BINDING PROTEIN 3 (AFP3)  | ABI five binding 3_11384223   | 12.43 | promoter          |
| AT3G50790 | na                                 | esterase/lipase/ 3_18882183   | 12.43 | promoter          |
| AT3G50800 | na                                 | unknown proteir 3_18882183    | 12.43 | downstream        |
| AT5G15440 | EID1-LIKE 1 (EDL1)                 | EID1-like 1 (EDI 5_5011937    | 12.42 | promoter          |
| AT5G15430 | na                                 | Plant calmodulir 5_5011937    | 12.42 | downstream        |
| AT4G21850 | METHIONINE SULFOXIDE REDUCTASE     | methionine sulfc 4_11595039   | 12.41 | proximal promoter |
| AT2G46150 | na                                 | Late embryoger 2_18965133     | 12.4  | intergenic        |
| AT2G46160 | na                                 | RING/U-box suj 2_18965133     | 12.4  | intergenic        |
| AT2G46170 | na                                 | Reticulon family 2_18965133   | 12.4  | promoter          |
| AT4G32800 | na                                 | encodes a mem 4_15817641      | 12.4  | proximal promoter |
| AT1G64380 | na                                 | encodes a mem 1_23895854      | 12.4  | intergenic        |
| AT1G21130 | INDOLE GLUCOSINOLATE O-METHYLTI    | O-methyltransfe 1_7401346     | 12.39 | proximal promoter |
| AT1G06360 | na                                 | Fatty acid desat 1_1938757    | 12.39 | downstream        |
| AT4G30400 | na                                 | RING/U-box suj 4_14869239     | 12.39 | intergenic        |
| AT4G30410 | na                                 | sequence-speci 4_14869239     | 12.39 | intergenic        |
| AT4G36648 | na                                 | Unknown gene 4_17282972       | 12.39 | promoter          |
| AT2G30500 | NETWORKED 4B (NET4B)               | Kinase interacti 2_13000652   | 12.39 | promoter          |
| AT4G36650 | PLANT-SPECIFIC TFIIIB-RELATED PROT | Encodes a prote 4_17282972    | 12.39 | downstream        |
| AT1G68530 | 3-KETOACYL-COA SYNTHASE 6 (KCS6)   | Encodes KCS6, 1_25714988      | 12.38 | promoter          |
| AT5G45428 | CONSERVED PEPTIDE UPSTREAM OPE     | Upstream open 5_18407348      | 12.38 | promoter          |
| AT5G65430 | GENERAL REGULATORY FACTOR 8 (Gl    | member of 14-3 5_26150535     | 12.38 | promoter          |
| AT2G47730 | GLUTATHIONE S-TRANSFERASE PHI 8    | Encodes glutatf 2_19558135    | 12.38 | five_prime_UTR    |
| AT5G65440 | na                                 | unknown proteir 5_26150535    | 12.38 | proximal promoter |
| AT5G45430 | na                                 | Protein kinase s 5_18407348   | 12.38 | intron            |
| AT1G68520 | na                                 | B-box type zinc 1_25714988    | 12.38 | intergenic        |
| AT1G68526 | na                                 | unknown proteir 1_25714988    | 12.38 | proximal promoter |
| AT2G47740 | na                                 | pre-tRNA; tRNA 2_19558135     | 12.38 | intergenic        |
| AT5G51330 | SWITCH1 (SW11)                     | Encodes novel 1_5_20862064    | 12.38 | promoter          |
| AT1G56590 | ZIG SUPPRESSOR 4 (ZIP4)            | Involved in vesi 1_21205420   | 12.38 | proximal promoter |
| AT1G15340 | METHYL-CPG-BINDING DOMAIN 10 (MB   | Protein containi 1_5277789    | 12.37 | promoter          |
| AT3G11760 | na                                 | unknown proteir 3_3717958     | 12.37 | promoter          |
| AT4G02100 | na                                 | Heat shock prot 4_930012      | 12.34 | promoter          |
| AT3G61460 | BRASSINOSTEROID-RESPONSIVE RINC    | Encodes a nove 3_22742484     | 12.33 | promoter          |
| AT3G25870 | na                                 | unknown proteir 3_9464284     | 12.33 | promoter          |
| AT3G61470 | PHOTOSYSTEM I LIGHT HARVESTING C   | Encodes a com 3_22742484      | 12.33 | intergenic        |
| AT3G14560 | na                                 | unknown proteir 3_4889134     | 12.32 | five_prime_UTR    |
| AT5G01810 | CBL-INTERACTING PROTEIN KINASE 15  | Encodes a CBL 5_308967        | 12.3  | promoter          |
| AT2G28405 | LOW-MOLECULAR-WEIGHT CYSTEINE-     | Encodes a merr 2_12152460     | 12.3  | intergenic        |
| AT5G01800 | na                                 | saposisin B doma 5_308967     | 12.3  | downstream        |
| AT2G22900 | na                                 | Galactosyl trans 2_9746494    | 12.3  | promoter          |
| AT3G62700 | ATP-BINDING CASSETTE C14 (ABCC14)  | member of MRF 3_23196160      | 12.27 | promoter          |
| AT1G44760 | na                                 | Adenine nucleoi 1_16900935    | 12.27 | proximal promoter |
| AT3G26740 | CCR-LIKE (CCL)                     | transcripts are 3_9827547     | 12.26 | promoter          |
| AT3G26730 | na                                 | RING/U-box suj 3_9827547      | 12.26 | downstream        |
| AT4G26080 | ABA INSENSITIVE 1 (ABI1)           | Involved in absc 4_13222036   | 12.25 | five_prime_UTR    |
| AT2G01560 | na                                 | Plant protein 15 2_252971     | 12.25 | proximal promoter |
| AT3G60520 | na                                 | unknown proteir 3_22367504    | 12.25 | intergenic        |
| AT4G26095 | na                                 | Potential natura 4_13222036   | 12.25 | intergenic        |
| AT2G38310 | PYR1-LIKE 4 (PYL4)                 | Encodes a merr 2_16051882     | 12.25 | intergenic        |
| AT4G26090 | RESISTANT TO P. SYRINGAE 2 (RPS2)  | Encodes a plasi 4_13222036    | 12.25 | proximal promoter |
| AT3G05937 | na                                 | unknown proteir 3_1776681     | 12.24 | five_prime_UTR    |
| AT4G35060 | HEAVY METAL ASSOCIATED ISOPRENE    | Heavy metal tra 4_16689679    | 12.22 | proximal promoter |
| AT5G26660 | MYB DOMAIN PROTEIN 86 (MYB86)      | myb domain prc 5_9327689      | 12.22 | intergenic        |
| AT4G30610 | BRI1 SUPPRESSOR 1 (BRS1)           | Encodes a secr 4_14943939     | 12.21 | promoter          |
| AT2G20580 | 26S PROTEASOME REGULATORY SUBI     | encoding the Rf 2_8858160     | 12.2  | proximal promoter |
| AT2G20570 | GBF'S PRO-RICH REGION-INTERACTIN   | Encodes GLK1, 2_8858160       | 12.2  | intergenic        |
| AT1G04130 | TETRATRIPEPTIDE REPEAT 2 (TPR2)    | Encodes one of 1_1073135      | 12.2  | promoter          |
| AT4G39800 | D-MYO-INOSITOL 3-PHOSPHATE SYNTI   | ** Referred to a: 4_18472290  | 12.19 | promoter          |
| AT3G50780 | na                                 | BEST Arabidop: 3_18877759     | 12.19 | promoter          |
| AT3G18930 | na                                 | RING/U-box suj 3_6526533      | 12.18 | proximal promoter |
| AT3G18940 | na                                 | ciast3-related; C 3_6526533   | 12.18 | intergenic        |
| AT4G18670 | na                                 | Leucine-rich re: 4_10275339   | 12.17 | downstream        |
| AT4G18660 | na                                 | unknown proteir 4_10275339    | 12.17 | intergenic        |
| AT3G23230 | TRANSCRIPTIONAL REGULATOR OF DI    | encodes a mem 3_8290210       | 12.17 | promoter          |
| AT2G38000 | na                                 | chaperone prote 2_15905553    | 12.16 | promoter          |
| AT1G79120 | na                                 | Ubiquitin carbox 1_29766788   | 12.16 | three_prime_UTR   |
| AT1G28280 | na                                 | VQ motif-contai 1_9884921     | 12.16 | intergenic        |
| AT2G28550 | RELATED TO AP2.7 (RAP2.7)          | related to AP2.7 2_12230378   | 12.16 | proximal promoter |
| AT1G25560 | TEMPRANILLO 1 (TEM1)               | Encodes a merr 1_8983771      | 12.16 | proximal promoter |
| AT4G13840 | na                                 | HXXXD-type ac 4_8015407       | 12.15 | intron            |
| AT3G55980 | SALT-INDUCIBLE ZINC FINGER 1 (SZF1 | salt-inducible zii 3_20775804 | 12.15 | promoter          |
| AT5G19290 | na                                 | alpha/beta-Hydr 5_6494001     | 12.14 | promoter          |
| AT5G19300 | na                                 | CONTAINS Inte 5_6494001       | 12.14 | proximal promoter |

|           |                                    |                               |       |                   |
|-----------|------------------------------------|-------------------------------|-------|-------------------|
| AT1G50450 | na                                 | Saccharopine d 1_18690853     | 12.13 | promoter          |
| AT5G28040 | na                                 | DNA-binding str 5_10039158    | 12.12 | promoter          |
| AT1G66173 | na                                 | other RNA 1_24644808          | 12.11 | intergenic        |
| AT3G51890 | na                                 | Clathrin light ch: 3_19251065 | 12.1  | promoter          |
| AT3G51895 | SULFATE TRANSPORTER 3;1 (SULTR3;   | Encodes a sulfa 3_19251065    | 12.1  | downstream        |
| AT1G17140 | INTERACTOR OF CONSTITUTIVE ACTIV   | Encodes a ROF 1_5859863       | 12.09 | proximal promoter |
| AT3G50665 | na                                 | pre-tRNA; tRNA 3_18822067     | 12.09 | intergenic        |
| AT1G17145 | na                                 | RING/U-box suj 1_5859863      | 12.09 | intergenic        |
| AT3G46630 | na                                 | Protein of unknc 3_17182718   | 12.09 | promoter          |
| AT3G46640 | PHYTOCLOCK 1 (PCL1)                | Encodes a myb 3_17182718      | 12.09 | promoter          |
| AT5G13220 | JASMONATE-ZIM-DOMAIN PROTEIN 10    | Plants overexpr 5_4220715     | 12.08 | three_prime_UTR   |
| AT1G78020 | na                                 | Protein of unknc 1_29336682   | 12.08 | proximal promoter |
| AT1G78010 | na                                 | tRNA modificati 1_29336682    | 12.08 | downstream        |
| AT5G13225 | na                                 | snoRNA; snoRt 5_4220715       | 12.08 | intergenic        |
| AT5G13230 | na                                 | Tetratricopeptid 5_4220715    | 12.08 | proximal promoter |
| AT4G30950 | FATTY ACID DESATURASE 6 (FAD6)     | Chloroplastic er 4_15061714   | 12.07 | proximal promoter |
| AT4G40030 | na                                 | Histone superfa 4_18558976    | 12.07 | proximal promoter |
| AT4G40040 | na                                 | Histone superfa 4_18558976    | 12.07 | promoter          |
| AT4G40042 | na                                 | Microsomal sigr 4_18558976    | 12.07 | promoter          |
| AT4G36220 | FERULIC ACID 5-HYDROXYLASE 1 (FAH  | encodes ferulat 4_17136220    | 12.06 | intergenic        |
| AT5G28840 | GDP-D-MANNOSE 3',5'-EPIMERASE (GM  | Encodes a prot 5_10862213     | 12.06 | three_prime_UTR   |
| AT1G69690 | TEOSINTE BRANCHED1/CYCLOIDEA/PC    | ATTCP15 is invc 1_26215708    | 12.06 | proximal promoter |
| AT2G30580 | DREB2A-INTERACTING PROTEIN 2 (DRI  | Encodes a C3H 2_13030644      | 12.05 | three_prime_UTR   |
| AT5G52520 | OVULE ABORTION 6 (OVA6)            | OVULE ABORT 5_21310356        | 12.05 | proximal promoter |
| AT2G30590 | WRKY DNA-BINDING PROTEIN 21 (WRK   | Encodes WRKY 2_13030644       | 12.05 | proximal promoter |
| AT3G13810 | INDETERMINATE(ID)-DOMAIN 11 (IDD11 | indeterminate(IL 3_4541652    | 12.04 | proximal promoter |
| AT3G26450 | na                                 | Polyketide cycl 3_9681760     | 12.04 | exon              |
| AT3G26460 | na                                 | Polyketide cycl 3_9681760     | 12.04 | intergenic        |
| AT3G13800 | na                                 | Metallo-hydrola: 3_4541652    | 12.04 | downstream        |
| AT4G27870 | na                                 | Vacuolar iron tr: 4_13878143  | 12.04 | proximal promoter |
| AT3G61880 | CYTOCHROME P450 78A9 (CYP78A9)     | Encodes a cyto 3_22910817     | 12.02 | proximal promoter |
| AT4G30350 | na                                 | Double Clp-N m 4_14846146     | 12.02 | proximal promoter |
| AT2G46500 | PHOSPHOINOSITIDE 4-KINASE GAMMA    | Phosphoinositid 2_19089095    | 12.02 | promoter          |
| AT2G44480 | BETA GLUCOSIDASE 17 (BGLU17)       | beta glucosidas 2_18363781    | 12.01 | intergenic        |
| AT1G79910 | na                                 | Regulator of Vp 1_30054546    | 12.01 | promoter          |
| AT2G44490 | PENETRATION 2 (PEN2)               | Encodes a glycc 2_18363781    | 12.01 | proximal promoter |
| AT5G62130 | na                                 | Per1-like family 5_24953167   | 12    | five_prime_UTR    |
| AT5G62140 | na                                 | unknown proteir 5_24953167    | 12    | intergenic        |
| AT1G57680 | CANDIDATE G-PROTEIN COUPLED REC    | FUNCTIONS IN 1_21364771       | 11.99 | promoter          |
| AT3G60530 | GATA TRANSCRIPTION FACTOR 4 (GAT1  | Encodes a merr 3_22374349     | 11.98 | three_prime_UTR   |
| AT3G46630 | na                                 | Protein of unknc 3_17180189   | 11.98 | intergenic        |
| AT3G60540 | na                                 | Preprotein trans 3_22374349   | 11.98 | intergenic        |
| AT3G46620 | RING AND DOMAIN OF UNKNOWN FUN     | Encodes an AB_3_17180189      | 11.98 | promoter          |
| AT1G72150 | PATELLIN 1 (PATL1)                 | novel cell-plate- 1_27152645  | 11.97 | intergenic        |
| AT1G01480 | 1-AMINO-CYCLOPROPANE-1-CARBOXY     | a member of the 1_174799      | 11.96 | proximal promoter |
| AT4G36870 | BEL1-LIKE HOMEODOMAIN 2 (BLH2)     | Encodes a merr 4_17367046     | 11.96 | proximal promoter |
| AT2G01905 | CYCLIN J18 (CYCJ18)                | cyclin J18 (cycJ 2_412371     | 11.96 | intron            |
| AT3G53720 | CATION/H+ EXCHANGER 20 (CHX20)     | member of Puta 3_19910560     | 11.95 | promoter          |
| AT3G59884 | MICRORNA827A (MIR827A)             | Encodes a micr 3_22122183     | 11.95 | intergenic        |
| AT3G59880 | na                                 | unknown proteir 3_22122183    | 11.95 | intergenic        |
| AT1G76560 | CP12 DOMAIN-CONTAINING PROTEIN 3   | CP12 domain-c 1_28728160      | 11.94 | promoter          |
| AT1G76550 | na                                 | Phosphofructok 1_28728160     | 11.94 | proximal promoter |
| AT1G76570 | na                                 | Chlorophyll A-B 1_28728160    | 11.94 | proximal promoter |
| AT3G62630 | na                                 | Protein of unknc 3_23166189   | 11.91 | proximal promoter |
| AT3G62640 | na                                 | Protein of unknc 3_23166189   | 11.91 | downstream        |
| AT2G35950 | EMBRYO SAC DEVELOPMENT ARREST      | embryo sac dev 2_15104557     | 11.9  | promoter          |
| AT2G26650 | K+ TRANSPORTER 1 (KT1)             | Encodes AKT1, 2_11336699      | 11.9  | promoter          |
| AT1G01471 | na                                 | unknown proteir 1_173476      | 11.9  | downstream        |
| AT1G03457 | na                                 | RNA-binding (R 1_865309       | 11.89 | proximal promoter |
| AT3G45775 | na                                 | transposable elk 3_16815246   | 11.89 | proximal promoter |
| AT1G03470 | NETWORKED 3A (NET3A)               | Encodes a merr 1_865309       | 11.89 | intergenic        |
| AT1G04240 | SHORT HYPOCOTYL 2 (SHY2)           | SHY2/IAA3 reg: 1_1129603      | 11.89 | promoter          |
| AT5G20250 | DARK INDUCIBLE 10 (DIN10)          | encodes a mem 5_6832522       | 11.88 | proximal promoter |
| AT4G22820 | na                                 | A20/AN1-like zir 4_11986618   | 11.88 | intergenic        |
| AT2G05518 | na                                 | Unknown gene 2_2024145        | 11.88 | downstream        |
| AT1G76954 | na                                 | Encodes a defe 1_28917042     | 11.88 | intergenic        |
| AT5G20260 | na                                 | Exostosin family 5_6832522    | 11.88 | intergenic        |
| AT4G33220 | PECTIN METHYLESTERASE 44 (PME44)   | pectin methyles 4_16024277    | 11.88 | intron            |
| AT3G28910 | MYB DOMAIN PROTEIN 30 (MYB30)      | transcription fac 3_10910978  | 11.87 | promoter          |
| AT4G27652 | na                                 | unknown proteir 4_13812957    | 11.87 | intergenic        |
| AT4G27654 | na                                 | unknown proteir 4_13812957    | 11.87 | intergenic        |
| AT4G27657 | na                                 | unknown proteir 4_13812957    | 11.87 | promoter          |
| AT1G27213 | na                                 | unknown proteir 1_9459288     | 11.85 | intergenic        |
| AT5G16370 | ACYL ACTIVATING ENZYME 5 (AAE5)    | acyl activating e 5_5359091   | 11.84 | proximal promoter |
| AT1G11000 | MILDEW RESISTANCE LOCUS O 4 (MLC   | A member of a 1_13676163      | 11.84 | promoter          |
| AT5G16380 | na                                 | Protein of unknc 5_5359091    | 11.84 | intergenic        |
| AT5G16375 | na                                 | pre-tRNA; tRNA 5_5359091      | 11.84 | downstream        |
| AT2G32970 | na                                 | unknown proteir 2_13996460    | 11.84 | proximal promoter |
| AT1G11010 | na                                 | pre-tRNA; tRNA 1_3676163      | 11.84 | promoter          |
| AT1G11020 | na                                 | RING/FYVE/PH 1_3676163        | 11.84 | proximal promoter |
| AT1G49730 | na                                 | Protein kinase s 1_18406362   | 11.84 | proximal promoter |
| AT1G49740 | na                                 | PLC-like phospl 1_18406362    | 11.84 | proximal promoter |
| AT4G29140 | ACTIVATED DISEASE SUSCEPTIBILITY   | Encodes Activa 4_14364290     | 11.83 | intergenic        |
| AT4G22570 | ADENINE PHOSPHORIBOSYL TRANSFE     | Encodes an ade 4_11882459     | 11.83 | intron            |
| AT4G22560 | na                                 | unknown proteir 4_11882459    | 11.83 | intergenic        |
| AT5G28300 | na                                 | Duplicated hom 5_10297187     | 11.82 | proximal promoter |
| AT4G19390 | na                                 | Uncharacteriser 4_10574996    | 11.82 | exon              |
| AT3G61630 | CYTOKININ RESPONSE FACTOR 6 (CRI   | CRF6 encodes 3_22804677       | 11.81 | proximal promoter |
| AT3G50480 | HOMOLOG OF RPW8 4 (HR4)            | Homolog of RP1 3_18731401     | 11.81 | proximal promoter |
| AT2G38040 | ACETYL CO-ENZYME A CARBOXYLASE     | encodes the cai 2_15917034    | 11.79 | promoter          |
| AT2G38025 | na                                 | Cysteine proteir 2_15917034   | 11.79 | promoter          |
| AT2G38030 | na                                 | pre-tRNA; tRNA 2_15917034     | 11.79 | downstream        |
| AT5G49090 | na                                 | transposable elk 5_19895683   | 11.79 | proximal promoter |
| AT5G52900 | MEMBRANE-ASSOCIATED KINASE REG     | Encodes a merr 5_21454509     | 11.78 | proximal promoter |

|           |                                     |                    |              |       |                   |
|-----------|-------------------------------------|--------------------|--------------|-------|-------------------|
| AT5G52901 | na                                  | This gene encodes  | 5_21454509   | 11.78 | exon              |
| AT5G24300 | STARCH SYNTHASE 1 (SS1)             | SSI is a plastidic | 5_8266403    | 11.78 | promoter          |
| AT1G22380 | UDP-GLUCOSYL TRANSFERASE 85A3       | Encodes a puta     | 1_7900123    | 11.78 | intergenic        |
| AT1G22370 | UDP-GLUCOSYL TRANSFERASE 85A5       | UDP-glucosyl tr    | 1_7900123    | 11.78 | promoter          |
| AT1G44760 | na                                  | Adenine nucleoi    | 1_16897055   | 11.77 | intron            |
| AT5G54770 | (TH11)                              | Encodes a thiar    | 5_22245972   | 11.76 | proximal promoter |
| AT1G17620 | na                                  | Late embryoger     | 1_6062083    | 11.76 | promoter          |
| AT5G54760 | na                                  | Translation initi  | 5_22245972   | 11.76 | downstream        |
| AT3G22380 | TIME FOR COFFEE (TIC)               | Encodes a nucl     | 3_7910149    | 11.76 | proximal promoter |
| AT5G04530 | 3-KETOACYL-COA SYNTHASE 19 (KCS1)   | Encodes KCS1!      | 5_1291829    | 11.75 | three_prime_UTR   |
| AT3G23440 | EMBRYO SAC DEVELOPMENT ARREST       | EMBRYO SAC         | 3_8404657    | 11.75 | exon              |
| AT4G05010 | F-BOX STRESS INDUCED 3 (FBS3)       | F-box family prc   | 4_2567109    | 11.75 | promoter          |
| AT5G04520 | na                                  | Protein of unkn    | 5_1291829    | 11.75 | proximal promoter |
| AT4G17453 | na                                  | This gene encod    | 4_9738140    | 11.73 | exon              |
| AT4G39900 | na                                  | unknown protei     | 4_18511229   | 11.73 | proximal promoter |
| AT1G76940 | na                                  | RNA-binding (R     | 1_28904459   | 11.72 | promoter          |
| AT2G14210 | AGAMOUS-LIKE 44 (AGL44)             | MADS box gen       | 2_6018287    | 11.71 | promoter          |
| AT1G71710 | na                                  | DNase I-like su    | 1_26980938   | 11.7  | intron            |
| AT4G38660 | na                                  | Pathogenesis-rr    | 4_18066046   | 11.7  | downstream        |
| AT4G38650 | na                                  | Glycosyl hydrok    | 4_18066046   | 11.7  | downstream        |
| AT1G53840 | PECTIN METHYLESTERASE 1 (PME1)      | encodes a pecti    | 1_20101156   | 11.7  | promoter          |
| AT1G53830 | PECTIN METHYLESTERASE 2 (PME2)      | encodes a pecti    | 1_20101156   | 11.7  | intergenic        |
| AT3G47600 | MYB DOMAIN PROTEIN 94 (MYB94)       | Encodes a puta     | 3_17541503   | 11.69 | promoter          |
| AT5G37980 | na                                  | Zinc-binding del   | 5_15129092   | 11.69 | proximal promoter |
| AT4G27270 | na                                  | Quinone reduct     | 4_13664359   | 11.69 | proximal promoter |
| AT4G27280 | na                                  | Calcium-binding    | 4_13664359   | 11.69 | promoter          |
| AT5G43760 | 3-KETOACYL-COA SYNTHASE 20 (KCS2)   | Encodes KCS2!      | 5_17587121   | 11.68 | intron            |
| AT3G26200 | CYTOCHROME P450, FAMILY 71, SUBF    | putative cytochr   | 3_9591889    | 11.68 | intergenic        |
| AT3G26210 | CYTOCHROME P450, FAMILY 71, SUBF    | putative cytochr   | 3_9591889    | 11.68 | intergenic        |
| AT2G45820 | na                                  | Remorin family     | 1_2_18864742 | 11.68 | promoter          |
| AT2G45810 | na                                  | DEA(D/H)-box f     | 2_18864742   | 11.68 | intergenic        |
| AT5G43770 | na                                  | proline-rich fami  | 5_17587121   | 11.68 | proximal promoter |
| AT1G26945 | KIDARI (KDR)                        | Encodes a basi     | 1_9351989    | 11.67 | intron            |
| AT4G22550 | LIPID PHOSPHATE PHOSPHATASE BET     | Phosphatidic ac    | 4_11879644   | 11.67 | proximal promoter |
| AT3G06670 | na                                  | binding; FUNCT     | 3_2113663    | 11.67 | intron            |
| AT2G18969 | na                                  | Encodes a atyp     | 2_8230406    | 11.67 | proximal promoter |
| AT4G22560 | na                                  | unknown protei     | 4_11879644   | 11.67 | promoter          |
| AT5G52280 | na                                  | Myosin heavy c     | 5_21226218   | 11.66 | proximal promoter |
| AT1G48330 | na                                  | unknown protei     | 1_17863601   | 11.65 | promoter          |
| AT2G22990 | SINAPOYLGLUCOSE 1 (SNG1)            | sinapoylglucose    | 2_9784649    | 11.65 | proximal promoter |
| AT1G22640 | MYB DOMAIN PROTEIN 3 (MYB3)         | MYB-type trans     | 1_8006009    | 11.63 | promoter          |
| AT1G61890 | na                                  | MATE efflux fan    | 1_22877575   | 11.62 | intergenic        |
| AT3G61260 | na                                  | Remorin family     | 1_2_2677125  | 11.62 | promoter          |
| AT2G14890 | ARABINOGALACTAN PROTEIN 9 (AGP9)    | putative proline-  | 2_6400428    | 11.61 | intron            |
| AT4G23060 | IQ-DOMAIN 22 (IQD22)                | IQ-domain 22 (I    | 4_12086816   | 11.61 | promoter          |
| AT3G52105 | na                                  | unknown protei     | 3_19323104   | 11.61 | promoter          |
| AT3G52100 | na                                  | RING/FYVE/PH       | 3_19323104   | 11.61 | intergenic        |
| AT3G52110 | na                                  | unknown protei     | 3_19323104   | 11.61 | intergenic        |
| AT1G77800 | na                                  | PHD finger fami    | 1_29253226   | 11.6  | promoter          |
| AT1G72610 | GERMIN-LIKE PROTEIN 1 (GER1)        | germin-like prot   | 1_27340540   | 11.58 | promoter          |
| AT2G43540 | na                                  | unknown protei     | 2_18073062   | 11.58 | downstream        |
| AT2G43550 | na                                  | Encodes a defe     | 2_18073062   | 11.58 | promoter          |
| AT1G72600 | na                                  | hydroxyproline-    | 1_27340540   | 11.58 | downstream        |
| AT3G12600 | NUDIX HYDROLASE HOMOLOG 16 (NUI     | nudix hydrolase    | 3_4004418    | 11.58 | promoter          |
| AT3G23030 | INDOLE-3-ACETIC ACID INDUCIBLE 2 (I | auxin inducible    | 3_8181920    | 11.57 | promoter          |
| AT3G55734 | MICRORNA393B (MIR393B)              | Encodes a micr     | 3_20685363   | 11.57 | intergenic        |
| AT3G55730 | MYB DOMAIN PROTEIN 109 (MYB109)     | putative transcr   | 3_20685363   | 11.57 | proximal promoter |
| AT3G10015 | na                                  | pre-tRNA; tRNA     | 3_3090080    | 11.57 | promoter          |
| AT3G10020 | na                                  | unknown protei     | 3_3090080    | 11.57 | intergenic        |
| AT3G10030 | na                                  | aspartate/glutar   | 3_3090080    | 11.57 | intergenic        |
| AT4G37290 | na                                  | unknown protei     | 4_17550421   | 11.57 | promoter          |
| AT2G26710 | PHYB ACTIVATION TAGGED SUPPRESS     | Encodes a merr     | 2_11374516   | 11.56 | intergenic        |
| AT1G51690 | PROTEIN PHOSPHATASE 2A 55 KDa RE    | 55 kDa B regula    | 1_19162496   | 11.56 | proximal promoter |
| AT5G01810 | CBL-INTERACTING PROTEIN KINASE 1    | Encodes a CBL      | 5_312333     | 11.54 | intergenic        |
| AT5G01820 | SERINE/THREONINE PROTEIN KINASE     | Encodes a CBL      | 5_312333     | 11.54 | intergenic        |
| AT5G41760 | na                                  | Nucleotide-sug     | 5_16710547   | 11.53 | intergenic        |
| AT5G41761 | na                                  | unknown protei     | 5_16710547   | 11.53 | proximal promoter |
| AT1G02880 | THIAMIN PYROPHOSPHOKINASE 1 (TPK    | Encodes a thiar    | 1_644647     | 11.53 | intron            |
| AT1G70520 | CYSTEINE-RICH RLK (RECEPTOR-LIKE    | Encodes a cystr    | 1_26587613   | 11.51 | promoter          |
| AT1G70530 | CYSTEINE-RICH RLK (RECEPTOR-LIKE    | Encodes a cystr    | 1_26587613   | 11.51 | intergenic        |
| AT5G63340 | na                                  | unknown protei     | 5_25379592   | 11.51 | intron            |
| AT5G63350 | na                                  | unknown protei     | 5_25379592   | 11.51 | intergenic        |
| AT5G63320 | NUCLEAR PROTEIN X1 (NPX1)           | Encodes NPX1       | 5_25379592   | 11.51 | promoter          |
| AT4G21750 | MERISTEM LAYER 1 (ATML1)            | Encodes a hom      | 4_11555160   | 11.5  | promoter          |
| AT2G23290 | MYB DOMAIN PROTEIN 70 (MYB70)       | Member of the F    | 2_9908492    | 11.5  | proximal promoter |
| AT2G22180 | na                                  | hydroxyproline-    | 2_9428129    | 11.5  | proximal promoter |
| AT2G22760 | na                                  | basic helix-loop   | 2_9680404    | 11.5  | intergenic        |
| AT4G25030 | na                                  | unknown protei     | 4_12864495   | 11.5  | promoter          |
| AT5G47190 | na                                  | Ribosomal prote    | 5_19163888   | 11.5  | intergenic        |
| AT5G47180 | na                                  | Plant VAMP (ve     | 5_19163888   | 11.5  | promoter          |
| AT2G22170 | PLAT DOMAIN PROTEIN 2 (PLAT2)       | Lipase/lipoxoyg    | 2_9428129    | 11.5  | promoter          |
| AT4G00740 | QUASIMODO 3 (QUA3)                  | Encodes a Gol      | 4_311799     | 11.5  | proximal promoter |
| AT5G04530 | 3-KETOACYL-COA SYNTHASE 19 (KCS1)   | Encodes KCS1!      | 5_1296269    | 11.49 | proximal promoter |
| AT3G52910 | GROWTH-REGULATING FACTOR 4 (GR      | Growth regulatr    | 3_19621290   | 11.49 | proximal promoter |
| AT5G04540 | MYOTUBULARIN 2 (MTM2)               | Myotubularin-lik   | 5_1296269    | 11.49 | downstream        |
| AT4G21510 | F-BOX STRESS INDUCED 2 (FBS2)       | F-box family prc   | 4_11447252   | 11.48 | promoter          |
| AT5G44060 | na                                  | unknown protei     | 5_17731596   | 11.48 | exon              |
| AT5G44065 | na                                  | This gene encod    | 5_17731596   | 11.48 | proximal promoter |
| AT4G21520 | na                                  | Transducin/W       | 4_11447252   | 11.48 | downstream        |
| AT1G80290 | na                                  | a member of the    | 1_30190331   | 11.47 | intergenic        |
| AT1G80300 | NUCLEOTIDE TRANSPORTER 1 (NTT1)     | Encodes an AT      | 1_30190331   | 11.47 | proximal promoter |
| AT1G70940 | PIN-FORMED 3 (PIN3)                 | A regulator of ai  | 1_26745163   | 11.47 | intron            |
| AT1G23490 | ADP-RIBOSYLATION FACTOR 1 (ARF1)    | Gene encoding      | 1_8336570    | 11.45 | promoter          |
| AT1G23480 | CELLULOSE SYNTHASE-LIKE A3 (CSLA    | encodes a gene     | 1_8336570    | 11.45 | downstream        |



|           |                                    |                   |             |       |                   |
|-----------|------------------------------------|-------------------|-------------|-------|-------------------|
| AT1G32230 | RADICAL-INDUCED CELL DEATH1 (RCC   | Encodes a prot    | 1_11612000  | 11.45 | promoter          |
| AT4G23630 | VIRB2-INTERACTING PROTEIN 1 (BT1)  | VIRB2-interactir  | 4_12317748  | 11.45 | five_prime_UTR    |
| AT2G46250 | na                                 | myosin heavy c    | 2_18990331  | 11.42 | proximal promoter |
| AT2G41110 | CALMODULIN 2 (CAM2)                | Encodes a touc    | 2_17140125  | 11.41 | promoter          |
| AT2G41090 | na                                 | Calcium-binding   | 2_17140125  | 11.41 | intergenic        |
| AT1G62030 | na                                 | Cysteine/Histidi  | 1_22926788  | 11.41 | promoter          |
| AT2G41100 | TOUCH 3 (TCH3)                     | encodes a calm    | 2_17140125  | 11.41 | intergenic        |
| AT5G07440 | GLUTAMATE DEHYDROGENASE 2 (GDH)    | Encodes the be    | 5_2354799   | 11.4  | proximal promoter |
| AT2G20930 | na                                 | SNARE-like su     | 2_9002968   | 11.4  | proximal promoter |
| AT2G20940 | na                                 | Protein of unkn   | 2_9002968   | 11.4  | promoter          |
| AT2G20950 | na                                 | Arabidopsis ph    | 2_9002968   | 11.4  | promoter          |
| AT5G57565 | na                                 | Protein kinase    | 5_23308263  | 11.4  | proximal promoter |
| AT5G57560 | TOUCH 4 (TCH4)                     | Encodes a cell    | 5_23308263  | 11.4  | five_prime_UTR    |
| AT5G57550 | XYLOGLUCAN ENDOTRANSGLUCOSYL       | xyloglucan end    | 5_23308263  | 11.4  | proximal promoter |
| AT2G30990 | na                                 | Protein of unkn   | 2_13191714  | 11.39 | proximal promoter |
| AT5G52930 | na                                 | Protein of unkn   | 5_21470126  | 11.39 | promoter          |
| AT2G26700 | PINOID2 (PID2)                     | Encodes PID2,     | 2_11368395  | 11.39 | promoter          |
| AT3G48050 | 'SHUTTLE' IN CHINESE (SUO)         | Encodes a larg    | 3_17739865  | 11.38 | promoter          |
| AT1G13250 | GALACTURONOSYLTRANSFERASE-LIK      | Encodes a prote   | 1_4526183   | 11.38 | intergenic        |
| AT4G32020 | na                                 | unknown protei    | 4_15492009  | 11.38 | intergenic        |
| AT4G32030 | na                                 | unknown protei    | 4_15492009  | 11.38 | intron            |
| AT2G20670 | na                                 | Protein of unkn   | 2_8913638   | 11.38 | promoter          |
| AT1G13240 | na                                 | pre-tRNA; tRNA    | 1_4526183   | 11.38 | intergenic        |
| AT1G13230 | na                                 | Encodes a leuci   | 1_4526183   | 11.38 | intergenic        |
| AT1G13245 | ROTUNDIFOLIA LIKE 17 (RTFL17)      | ROTUNDIFOLI       | 1_4526183   | 11.38 | promoter          |
| AT4G24790 | na                                 | AAA-type ATPa     | 4_12775630  | 11.37 | proximal promoter |
| AT2G20080 | na                                 | unknown protei    | 2_8668371   | 11.35 | intergenic        |
| AT2G29550 | TUBULIN BETA-7 CHAIN (TUB7)        | Encodes a beta    | 2_12646303  | 11.35 | promoter          |
| AT4G23670 | na                                 | Polyketide cycl   | 4_12334902  | 11.34 | proximal promoter |
| AT5G16830 | SYNTAXIN OF PLANTS 21 (SYP21)      | member of SYP     | 5_5535382   | 11.34 | promoter          |
| AT4G21860 | METHIONINE SULFOXIDE REDUCTASE     | methionine sulf   | 4_11601748  | 11.33 | promoter          |
| AT1G69570 | na                                 | Dof-type zinc fir | 1_26164539  | 11.33 | proximal promoter |
| AT1G28680 | na                                 | HXXXD-type ac     | 1_10078166  | 11.33 | promoter          |
| AT1G28685 | na                                 | Potential natura  | 1_10078166  | 11.33 | exon              |
| AT1G72810 | na                                 | Pyridoxal-5'-ph   | 1_27402328  | 11.33 | proximal promoter |
| AT1G72820 | na                                 | Mitochondrial st  | 1_27402328  | 11.33 | proximal promoter |
| AT4G21865 | na                                 | unknown protei    | 4_11601748  | 11.33 | promoter          |
| AT5G04550 | na                                 | Protein of unkn   | 5_1306087   | 11.33 | five_prime_UTR    |
| AT1G29450 | na                                 | SAUR-like auxi    | 1_10305510  | 11.32 | intergenic        |
| AT1G29440 | SMALL AUXIN UP RNA 63 (SAUR63)     | SAUR-like auxi    | 1_10305510  | 11.32 | promoter          |
| AT5G63160 | BTB AND TAZ DOMAIN PROTEIN 1 (bt1) | BTB and TAZ di    | 5_25336960  | 11.31 | proximal promoter |
| AT1G54050 | na                                 | HSP20-like chai   | 1_20178016  | 11.31 | intergenic        |
| AT5G63168 | na                                 | unknown protei    | 5_25336960  | 11.31 | intergenic        |
| AT3G16570 | RAPID ALKALINIZATION FACTOR 23 (R) | Encodes RALF      | 3_5646160   | 11.31 | intergenic        |
| AT1G01950 | ARMADILLO REPEAT KINESIN 2 (ARK2)  | Encodes a merr    | 1_325166    | 11.3  | promoter          |
| AT2G24580 | na                                 | FAD-dependent     | 2_10446279  | 11.3  | promoter          |
| AT2G38304 | na                                 | unknown protei    | 2_16047128  | 11.3  | intergenic        |
| AT2G21300 | na                                 | ATP binding mic   | 2_9119981   | 11.3  | promoter          |
| AT5G08075 | na                                 | pre-tRNA; tRNA    | 5_2588093   | 11.29 | promoter          |
| AT5G08080 | SYNTAXIN OF PLANTS 132 (SYP132)    | member of SYP     | 5_2588093   | 11.29 | promoter          |
| AT2G37678 | FAR-RED ELONGATED HYPOCOTYL 1 (    | Positive regulat  | 2_15803455  | 11.28 | proximal promoter |
| AT2G37680 | na                                 | CONTAINS Inte     | 2_15803455  | 11.28 | three_prime_UTR   |
| AT3G19860 | BASIC HELIX-LOOP-HELIX 121 (bHLH12 | basic Helix-Loo   | 3_6902339   | 11.27 | proximal promoter |
| AT3G19850 | na                                 | Phototropic-res   | 3_6902339   | 11.27 | proximal promoter |
| AT3G61250 | MYB DOMAIN PROTEIN 17 (MYB17)      | LATE MERISTE      | 3_22670457  | 11.26 | proximal promoter |
| AT3G08610 | na                                 | unknown protei    | 3_2615206   | 11.26 | downstream        |
| AT4G24570 | DICARBOXYLATE CARRIER 2 (DIC2)     | Encodes one of    | 4_12686366  | 11.25 | promoter          |
| AT3G18220 | LIPID PHOSPHATE PHOSPHATASE 4 (L   | Phosphatidic ac   | 3_6246658   | 11.25 | proximal promoter |
| AT4G24565 | na                                 | pre-tRNA; tRNA    | 4_12686366  | 11.25 | downstream        |
| AT4G24580 | ROP1 ENHANCER 1 (REN1)             | Encodes a Rho     | 4_12686366  | 11.25 | intergenic        |
| AT3G04110 | GLUTAMATE RECEPTOR 1.1 (GLR1.1)    | putative glutam   | 3_1080769   | 11.24 | intergenic        |
| AT3G04120 | GLYCERALDEHYDE-3-PHOSPHATE DEH     | encodes cytos     | 3_1080769   | 11.24 | promoter          |
| AT2G45720 | na                                 | ARM repeat su     | 2_18833130  | 11.24 | promoter          |
| AT5G44255 | na                                 | transposable elk  | 5_17828964  | 11.24 | intergenic        |
| AT5G44260 | na                                 | Zinc finger C-x   | 8_17828964  | 11.24 | intergenic        |
| AT3G49530 | NAC DOMAIN CONTAINING PROTEIN 6    | Transcription fa  | 3_18365035  | 11.24 | promoter          |
| AT4G35760 | LUMEN THIOL OXIDOREDUCTASE 1 (L    | Encodes a bimc    | 4_16942006  | 11.23 | intergenic        |
| AT4G35750 | na                                 | SEC14 cytosolic   | 4_16942006  | 11.23 | promoter          |
| AT3G50070 | CYCLIN D3;3 (CYCD3;3)              | Encode CYCD3      | 3_18563332  | 11.22 | intergenic        |
| AT1G01310 | na                                 | CAP (Cysteine-    | 1_120659    | 11.22 | exon              |
| AT1G01320 | na                                 | Tetratricopeptid  | 1_120659    | 11.22 | intergenic        |
| AT5G37540 | na                                 | Eukaryotic aspa   | 5_14915084  | 11.22 | intergenic        |
| AT2G35860 | FASCICLIN-LIKE ARABINOGLACTAN P    | FASCICLIN-like    | 2_15062609  | 11.21 | intergenic        |
| AT3G09560 | na                                 | The PAH1 gene     | 3_2940224   | 11.21 | proximal promoter |
| AT3G09570 | na                                 | Lung seven trar   | 3_2940224   | 11.21 | promoter          |
| AT2G35859 | na                                 | Potential natura  | 2_15062609  | 11.21 | proximal promoter |
| AT2G35880 | na                                 | TPX2 (targeting   | 2_15062609  | 11.21 | intergenic        |
| AT4G12970 | STOMAGEN (STOMAGEN)                | Encodes a cyst    | 4_7585879   | 11.21 | intergenic        |
| AT5G58070 | TEMPERATURE-INDUCED LIPOCALIN (T   | Encodes a temp    | 5_23501407  | 11.21 | promoter          |
| AT1G11840 | GLYOXALASE I HOMOLOG (GLX1)        | Encodes a glyo    | 1_3998172   | 11.19 | intergenic        |
| AT1G11850 | na                                 | unknown protei    | 1_3998172   | 11.19 | proximal promoter |
| AT5G17300 | REVEILLE 1 (RVE1)                  | Myb-like transcr  | 5_5696252   | 11.19 | intergenic        |
| AT3G52340 | SUCROSE-6F-PHOSPHATE PHOSPHO       | sucrose-phosph    | 3_19406944  | 11.18 | promoter          |
| AT1G19310 | na                                 | RING/U-box su     | 1_6677837   | 11.17 | promoter          |
| AT5G13710 | STEROL METHYLTRANSFERASE 1 (SM     | SMT1 controls     | t_5_4426470 | 11.17 | intron            |
| AT4G27320 | (PHOS34)                           | Contains a univ   | 4_13677171  | 11.16 | intergenic        |
| AT4G27310 | na                                 | B-box type zinc   | 4_13677171  | 11.16 | intergenic        |
| AT2G18090 | na                                 | PHD finger fami   | 2_7864211   | 11.15 | promoter          |
| AT3G16620 | TRANSLOCON OUTER COMPLEX PROT      | component of T    | 3_5662152   | 11.15 | promoter          |
| AT2G44930 | na                                 | Plant protein of  | 2_18534144  | 11.14 | proximal promoter |
| AT5G24470 | PSEUDO-RESPONSE REGULATOR 5 (P     | Encodes a pse     | 5_8359931   | 11.14 | proximal promoter |
| AT1G67265 | ROTUNDIFOLIA LIKE 21 (RTFL21)      | ROTUNDIFOLI       | 1_25174909  | 11.13 | intergenic        |
| AT1G04120 | ATP-BINDING CASSETTE C5 (ABCC5)    | encodes a high    | 1_1064383   | 11.12 | downstream        |
| AT1G62370 | na                                 | RING/U-box su     | 1_23075589  | 11.12 | intergenic        |

|           |                                                     |                                |       |                   |
|-----------|-----------------------------------------------------|--------------------------------|-------|-------------------|
| AT1G70310 | SPERMIDINE SYNTHASE 2 (SPDS2)                       | Spermidine syn1_1_26484966     | 11.12 | intergenic        |
| AT1G04110 | STOMATAL DENSITY AND DISTRIBUTION 1 (SD1)           | Initially identified 1_1064383 | 11.12 | proximal promoter |
| AT1G73670 | MAP KINASE 15 (MPK15)                               | member of MAF_1_27699171       | 11.11 | proximal promoter |
| AT2G16630 | na                                                  | Pollen Ole e 1 a 2_7208905     | 11.11 | promoter          |
| AT5G06865 | na                                                  | Potential natura 5_2132354     | 11.11 | five_prime_UTR    |
| AT5G06860 | POLYGALACTURONASE INHIBITING PROTEIN 1 (PGIP1)      | Encodes a poly; 5_2132354      | 11.11 | five_prime_UTR    |
| AT5G06870 | POLYGALACTURONASE INHIBITING PROTEIN 2 (PGIP2)      | Encodes a poly; 5_2132354      | 11.11 | proximal promoter |
| AT3G21320 | na                                                  | BEST Arabidop; 3_7503470       | 11.1  | proximal promoter |
| AT1G66940 | na                                                  | protein kinase-r 1_24974806    | 11.1  | promoter          |
| AT2G01580 | na                                                  | unknown proteir 2_263351       | 11.1  | intergenic        |
| AT2G16668 | na                                                  | unknown proteir 2_7223821      | 11.1  | downstream        |
| AT1G62035 | MICRORNA171C (MIR171C)                              | Encodes a micr 1_22928873      | 11.09 | intergenic        |
| AT2G45440 | DIHYDRODIPICOLINATE SYNTHASE (DIPIC)                | Encodes a prote 2_18733141     | 11.08 | downstream        |
| AT2G32690 | GLYCINE-RICH PROTEIN 23 (GRP23)                     | Glycine-rich pro 2_13865441    | 11.08 | proximal promoter |
| AT2G45450 | LITTLE ZIPPER 1 (ZPR1)                              | ZPR1, a small le 2_18733141    | 11.08 | downstream        |
| AT1G33240 | GT-2-LIKE 1 (GTL1)                                  | Encodes a plan 1_12056993      | 11.07 | proximal promoter |
| AT1G33250 | na                                                  | Protein of unkn 1_12056993     | 11.07 | intergenic        |
| AT2G43010 | PHYTOCHROME INTERACTING FACTOR 1 (PIF1)             | Isolated as a se 2_17886330    | 11.06 | promoter          |
| AT1G15700 | (ATPC2)                                             | One of two gene 1_5398851      | 11.05 | intergenic        |
| AT1G15690 | (AVP1)                                              | Encodes a H(+) 1_5398851       | 11.05 | promoter          |
| AT1G74950 | (TIFY10B)                                           | TIFY10B; CON1_1_28151154       | 11.05 | proximal promoter |
| AT1G74960 | FATTY ACID BIOSYNTHESIS 1 (FAB1)                    | Encodes a plasi 1_28151154     | 11.05 | intergenic        |
| AT1G15710 | na                                                  | prephenate deh 1_5398851       | 11.05 | intergenic        |
| AT5G23480 | na                                                  | SWIB/MDM2 dc 5_7915899         | 11.05 | promoter          |
| AT4G36030 | ARMADILLO REPEAT ONLY 3 (ARO3)                      | Armadillo repea 4_17048931     | 11.04 | proximal promoter |
| AT4G36040 | DNAJ11 (J11)                                        | Chaperone Dna 4_17048931       | 11.04 | intergenic        |
| AT4G36032 | na                                                  | Potential natura 4_17048931    | 11.04 | intergenic        |
| AT4G36050 | na                                                  | endonuclease/e 4_17048931      | 11.04 | intergenic        |
| AT4G36052 | na                                                  | Potential natura 4_17048931    | 11.04 | intergenic        |
| AT1G22810 | na                                                  | encodes a mem 1_8075840        | 11.04 | proximal promoter |
| AT1G22830 | na                                                  | Tetratricopeptid 1_8075840     | 11.04 | proximal promoter |
| AT2G23430 | (ICK1)                                              | Encodes a cycli 2_9978106      | 11.03 | promoter          |
| AT4G16780 | HOMEBOX PROTEIN 2 (HB-2)                            | Encodes a hom 4_9447431        | 11.03 | proximal promoter |
| AT1G59880 | na                                                  | pre-tRNA; tRNA 1_22034356      | 11.03 | intergenic        |
| AT1G59870 | PENETRATION 3 (PEN3)                                | ATP binding cas 1_22034356     | 11.03 | promoter          |
| AT4G19120 | EARLY-RESPONSIVE TO DEHYDRATION 1 (ERD1)            | early-responsivi 4_10463391    | 11.02 | intron            |
| AT1G10850 | na                                                  | Leucine-rich re 1_3611133      | 11.02 | proximal promoter |
| AT3G60030 | SQUAMOSA PROMOTER-BINDING PROTEIN 1 (SQP1)          | squamosa prom 3_22170105       | 11.02 | proximal promoter |
| AT1G10840 | TRANSLATION INITIATION FACTOR 3 (TIF3)              | Encodes eukary 1_3611133       | 11.02 | proximal promoter |
| AT4G13340 | LEUCINE-RICH REPEAT/EXTENSIN 3 (LIREX3)             | Leucine-rich re 4_7761374      | 11.01 | intergenic        |
| AT4G33030 | SULFOQUINOVOSYLDIACYLGLYCEROL SYNTHASE 1 (SQD1)     | involved in sulf 4_15934878    | 11.01 | proximal promoter |
| AT2G46830 | CIRCADIAN CLOCK ASSOCIATED 1 (CCA1)                 | Encodes a trans 2_19245396     | 11    | promoter          |
| AT5G04310 | na                                                  | Pectin lyase-like 5_1205559    | 11    | intron            |
| AT2G46820 | PHOTOSYSTEM I P SUBUNIT (PSI-P)                     | Encodes the P 2_19245396       | 11    | intergenic        |
| AT3G07360 | PLANT U-BOX 9 (PUB9)                                | Encodes a prote 3_2353811      | 11    | proximal promoter |
| AT1G28290 | ARABINOGLACTAN PROTEIN 31 (AGP31)                   | Encodes an aty 1_9893948       | 10.99 | proximal promoter |
| AT4G37310 | CYTOCHROME P450, FAMILY 81, SUBFAMILY 1 (CYP81B1)   | member of CYP 4_17555972       | 10.99 | three_prime_UTR   |
| AT4G37300 | MATERNAL EFFECT EMBRYO ARREST 1 (MEA1)              | maternal effect 4_17555972     | 10.99 | downstream        |
| AT4G36370 | na                                                  | unknown proteir 4_17189526     | 10.99 | intergenic        |
| AT1G32360 | na                                                  | Zinc finger (CC 1_11672770     | 10.99 | promoter          |
| AT3G62000 | na                                                  | S-adenosyl-L-m 3_22961329      | 10.99 | promoter          |
| AT4G36380 | ROTUNDIFOLIA 3 (ROT3)                               | Encodes a cytoi 4_17189526     | 10.99 | intron            |
| AT4G16140 | na                                                  | proline-rich fami 4_9128411    | 10.98 | proximal promoter |
| AT5G13400 | na                                                  | Major facilitator 5_4299344    | 10.98 | promoter          |
| AT3G14090 | EXOCYST SUBUNIT EXO70 FAMILY PROTEIN 1 (EXO70)      | A member of E) 3_4672675       | 10.97 | proximal promoter |
| AT5G02200 | FAR-RED-ELONGATED HYPOCOTYL1-L (FRL1)               | Encodes a smal 5_437258        | 10.97 | promoter          |
| AT3G14100 | na                                                  | RNA-binding (R 3_4672675       | 10.97 | promoter          |
| AT3G12910 | na                                                  | NAC (No Apical 3_4109108       | 10.97 | promoter          |
| AT5G02190 | PROMOTION OF CELL SURVIVAL 1 (PCS1)                 | encodes an asp 5_437258        | 10.97 | intergenic        |
| AT1G79650 | RADIATION SENSITIVE23B (RAD23B)                     | Encodes a merr 1_29975515      | 10.97 | promoter          |
| AT2G05520 | GLYCINE-RICH PROTEIN 3 (GRP-3)                      | Encodes a glyci 2_2025992      | 10.96 | promoter          |
| AT4G37470 | KARRIKIN INSENSITIVE 2 (KAI2)                       | HTL belonging t 4_17616841     | 10.96 | three_prime_UTR   |
| AT4G37460 | SUPPRESSOR OF RPS4-RLD 1 (SRFR1)                    | Encodes a tetr 4_17616841      | 10.96 | proximal promoter |
| AT1G75580 | na                                                  | SAUR-like auxi 1_28377173      | 10.95 | promoter          |
| AT2G36410 | na                                                  | Family of unkno 2_15278487     | 10.95 | promoter          |
| AT3G55430 | na                                                  | O-Glycosyl hydri 3_20552086    | 10.95 | five_prime_UTR    |
| AT3G55440 | TRIOSEPHOSPHATE ISOMERASE (TPI)                     | Encodes triosep 3_20552086     | 10.95 | proximal promoter |
| AT3G57880 | na                                                  | Calcium-depend 3_21430493      | 10.94 | intergenic        |
| AT1G70940 | na                                                  | unknown proteir 1_26749405     | 10.94 | promoter          |
| AT3G57870 | SUMO CONJUGATION ENZYME 1 (SCE1)                    | Encodes a SUV 3_21430493       | 10.94 | promoter          |
| AT5G10550 | GLOBAL TRANSCRIPTION FACTOR GR1                     | This gene is pre 5_3336129     | 10.93 | proximal promoter |
| AT2G40100 | LIGHT HARVESTING COMPLEX PHOTODIODESIS 1 (LHC1)     | Lhcb4:3 protein 2_16743967     | 10.93 | proximal promoter |
| AT5G10540 | na                                                  | Zincin-like meta 5_3336129     | 10.93 | intergenic        |
| AT5G10560 | na                                                  | Glycosyl hydrol 5_3336129      | 10.93 | downstream        |
| AT2G40095 | na                                                  | Alpha/beta hydr 2_16743967     | 10.93 | intron            |
| AT5G56260 | na                                                  | Ribonuclease E 5_22777592      | 10.93 | promoter          |
| AT4G27950 | CYTOKININ RESPONSE FACTOR 4 (CRF4)                  | encodes a mem 4_13911501       | 10.92 | proximal promoter |
| AT1G72280 | ENDOPLASMIC RETICULUM OXIDOREDUCTASE 1 (ERD1)       | endoplasmic ret 1_27214779     | 10.92 | promoter          |
| AT1G30690 | na                                                  | Sec14p-like phc 1_10887512     | 10.92 | promoter          |
| AT5G57710 | na                                                  | Double Clp-N m 5_23389100      | 10.92 | intergenic        |
| AT3G57060 | na                                                  | binding; FUNCT 3_21123286      | 10.91 | proximal promoter |
| AT3G57062 | na                                                  | unknown proteir 3_21123286     | 10.91 | intergenic        |
| AT3G57070 | na                                                  | Glutaredoxin far 3_21123286    | 10.91 | proximal promoter |
| AT1G62301 | na                                                  | unknown proteir 1_23020402     | 10.9  | downstream        |
| AT4G35760 | LUMEN THIOL OXIDOREDUCTASE 1 (LTI1)                 | Encodes a bimc 4_16944861      | 10.89 | promoter          |
| AT3G61962 | na                                                  | This gene encoi 3_22946077     | 10.89 | intergenic        |
| AT4G35770 | SENESCENCE 1 (SEN1)                                 | Senescence-as 4_16944861       | 10.89 | promoter          |
| AT4G35780 | SERINE/THREONINE/TYROSINE KINASE ACT-LIKE 1 (STYK1) | ACT-like proteir 4_16944861    | 10.89 | intergenic        |
| AT2G26190 | na                                                  | calmodulin-bind 2_11150580     | 10.88 | promoter          |
| AT2G40475 | ALTERED SEED GERMINATION 8 (ASG8)                   | unknown proteir 2_16908668     | 10.87 | proximal promoter |
| AT1G12520 | COPPER CHAPERONE FOR SOD1 (CCS1)                    | Copper-zinc sur 1_4266867      | 10.87 | intergenic        |
| AT2G23321 | na                                                  | unknown proteir 2_9924789      | 10.87 | proximal promoter |
| AT1G12510 | na                                                  | pre-tRNA; tRNA 1_4266867       | 10.87 | downstream        |
| AT2G40480 | na                                                  | Plant protein of 2_16908668    | 10.87 | proximal promoter |

|           |                                     |                    |            |       |                   |
|-----------|-------------------------------------|--------------------|------------|-------|-------------------|
| AT3G17640 | na                                  | Leucine-rich rep   | 3_6032202  | 10.87 | promoter          |
| AT4G35470 | PLANT INTRACELLULAR RAS GROUP-R     | Encodes PIRL4      | 4_16849125 | 10.87 | three_prime_UTR   |
| AT3G20070 | TITAN9 (TTN9)                       | Encodes a plan     | 3_7007078  | 10.87 | promoter          |
| AT2G23230 | WRKY DNA-BINDING PROTEIN 15 (WRK    | Encodes WRKY       | 2_9924789  | 10.87 | promoter          |
| AT2G28470 | BETA-GALACTOSIDASE 8 (BGAL8)        | putative beta-ga   | 2_12173679 | 10.86 | promoter          |
| AT5G03730 | CONSTITUTIVE TRIPLE RESPONSE 1 (C   | Homologous to      | 5_974177   | 10.86 | intergenic        |
| AT5G03720 | HEAT SHOCK TRANSCRIPTION FACTOR     | Member of Heat     | 5_974177   | 10.86 | promoter          |
| AT1G18720 | na                                  | Protein of unkn    | 1_6457170  | 10.86 | intergenic        |
| AT1G68840 | RELATED TO ABI3/VP1 2 (RAV2)        | Rav2 is part of    | 1_25877727 | 10.86 | proximal promoter |
| AT1G68830 | STT7 HOMOLOG STN7 (STN7)            | STN7 protein ki    | 1_25877727 | 10.86 | proximal promoter |
| AT2G27660 | na                                  | Cysteine/Histidi   | 2_11799446 | 10.85 | exon              |
| AT2G18890 | na                                  | Protein kinase s   | 2_8183743  | 10.85 | promoter          |
| AT3G47750 | ATP-BINDING CASSETTE A4 (ABCA4)     | member of ATH      | 3_17606317 | 10.84 | promoter          |
| AT2G46020 | BRAHMA (BRM)                        | Encodes a SWI      | 2_18922712 | 10.84 | proximal promoter |
| AT5G66640 | DA1-RELATED PROTEIN 3 (DAR3)        | DA1-related pro    | 5_26598328 | 10.84 | proximal promoter |
| AT2G46000 | na                                  | FUNCTIONS IN       | 2_18922712 | 10.84 | proximal promoter |
| AT5G66631 | na                                  | Tetratricopeptid   | 5_26598328 | 10.84 | downstream        |
| AT3G12020 | na                                  | P-loop containir   | 3_3826059  | 10.84 | promoter          |
| AT2G27770 | na                                  | Plant protein of   | 2_11829819 | 10.84 | intergenic        |
| AT1G04690 | POTASSIUM CHANNEL BETA SUBUNIT      | potassium chan     | 1_1313025  | 10.84 | proximal promoter |
| AT3G51960 | BASIC LEUCINE ZIPPER 24 (BZIP24)    | bZIP transcripti   | 3_19281475 | 10.83 | intergenic        |
| AT2G23290 | MYB DOMAIN PROTEIN 70 (MYB70)       | Member of the f    | 2_9906639  | 10.83 | proximal promoter |
| AT3G51950 | na                                  | Zinc finger (CC    | 3_19281475 | 10.83 | promoter          |
| AT2G22780 | PEROXISOMAL NAD-MALATE DEHYDR       | encodes an per     | 2_9688725  | 10.83 | intergenic        |
| AT1G71695 | na                                  | Peroxidase sup     | 1_26963425 | 10.82 | proximal promoter |
| AT3G12190 | na                                  | BEST Arabidop:     | 3_3885210  | 10.82 | proximal promoter |
| AT4G38690 | na                                  | PLC-like phosph    | 4_18076136 | 10.82 | promoter          |
| AT5G51740 | na                                  | Peptidase famili   | 5_21020088 | 10.82 | intergenic        |
| AT4G38700 | na                                  | Disease resistai   | 4_18076136 | 10.82 | intergenic        |
| AT4G38710 | na                                  | glycine-rich prot  | 4_18076136 | 10.82 | intergenic        |
| AT5G51750 | SUBTILASE 1.3 (SBT1.3)              | subtilase 1.3 (S   | 5_21020088 | 10.82 | promoter          |
| AT1G71696 | SUPPRESSOR OF LLP1 1 (SOL1)         | Encodes a Puta     | 1_26963425 | 10.82 | intergenic        |
| AT1G78260 | na                                  | RNA-binding (R     | 1_29448349 | 10.81 | intron            |
| AT3G61310 | na                                  | AT hook motif D    | 3_22693112 | 10.81 | promoter          |
| AT5G16720 | na                                  | Protein of unkn    | 5_5497539  | 10.81 | intergenic        |
| AT5G16730 | na                                  | LOCATED IN: c      | 5_5497539  | 10.81 | promoter          |
| AT5G62230 | ERECTA-LIKE 1 (ERL1)                | Encodes a rece     | 5_25002354 | 10.8  | downstream        |
| AT3G51550 | FERONIA (FER)                       | Encodes a syne     | 3_19121154 | 10.8  | promoter          |
| AT5G62240 | na                                  | Cell cycle regul   | 5_25002354 | 10.8  | downstream        |
| AT2G41090 | na                                  | Calcium-binding    | 2_17135586 | 10.8  | promoter          |
| AT3G14310 | PECTIN METHYLESTERASE 3 (PME3)      | encodes a pecti    | 3_4773384  | 10.8  | intron            |
| AT1G25390 | na                                  | Protein kinase s   | 1_8911469  | 10.79 | proximal promoter |
| AT1G25400 | na                                  | unknown protei     | 1_8911469  | 10.79 | exon              |
| AT3G15470 | na                                  | Transducin/WD      | 3_5221156  | 10.79 | proximal promoter |
| AT1G11250 | SYNTAXIN OF PLANTS 125 (SYP125)     | member of SYP      | 1_3770420  | 10.79 | intergenic        |
| AT1G79840 | GLABRA 2 (GL2)                      | Glabra 2, a hor    | 1_30035812 | 10.78 | proximal promoter |
| AT1G61260 | na                                  | Protein of unkn    | 1_22598476 | 10.78 | intergenic        |
| AT5G61270 | PHYTOCHROME-INTERACTING FACTOR      | Basic helix-loop   | 5_24640728 | 10.77 | promoter          |
| AT5G40260 | (SWEET8)                            | Nodulin MtN3 fa    | 5_16088624 | 10.76 | proximal promoter |
| AT3G16470 | JASMONATE RESPONSIVE 1 (JR1)        | JA-responsive c    | 3_5598752  | 10.76 | intron            |
| AT2G40004 | na                                  | unknown protei     | 2_16706071 | 10.76 | intergenic        |
| AT3G62860 | na                                  | alpha/beta-Hydr    | 3_23240851 | 10.76 | intron            |
| AT1G22570 | na                                  | Major facilitator  | 1_7979475  | 10.76 | proximal promoter |
| AT4G39330 | CINNAMYL ALCOHOL DEHYDROGENAS       | cinnamyl alcohc    | 4_18290160 | 10.74 | proximal promoter |
| AT2G41430 | EARLY RESPONSIVE TO DEHYDRATION     | Encodes hydrog     | 2_17269221 | 10.74 | promoter          |
| AT2G27050 | ETHYLENE-INSENSITIVE3-LIKE 1 (EIL1) | ethylene-insens    | 2_11545757 | 10.74 | five_prime_UTR    |
| AT1G02360 | na                                  | Chitinase family   | 1_471595   | 10.74 | intergenic        |
| AT1G02350 | na                                  | protoporphyrino    | 1_471595   | 10.74 | intergenic        |
| AT1G80490 | TOPLESS-RELATED 1 (TPR1)            | TOPLESS-relat      | 1_30267454 | 10.74 | promoter          |
| AT5G28646 | WAVE-DAMPENED 2 (WVD2)              | Encodes a nove     | 5_10674336 | 10.74 | promoter          |
| AT2G41420 | WINDHOSE 2 (WIH2)                   | proline-rich fami  | 2_17269221 | 10.74 | proximal promoter |
| AT1G29330 | ENDOPLASMIC RETICULUM RETENTIO      | Encodes a prote    | 1_10261307 | 10.73 | promoter          |
| AT4G01720 | (WRKY47)                            | member of WRK      | 4_744137   | 10.72 | proximal promoter |
| AT2G24540 | ATTENUATED FAR-RED RESPONSE (AF     | ATTENUATED         | 2_10429377 | 10.72 | intergenic        |
| AT5G53560 | CYTOCHROME B5 ISOFORM E (CB5-E)     | Encodes a cyto     | 5_21763577 | 10.72 | intergenic        |
| AT5G53570 | na                                  | Ypt/Rab-GAP di     | 5_21763577 | 10.72 | promoter          |
| AT2G24545 | na                                  | Potential natura   | 2_10429377 | 10.72 | proximal promoter |
| AT2G24550 | na                                  | unknown protei     | 2_10429377 | 10.72 | promoter          |
| AT5G45860 | PYR1-LIKE 11 (PYL11)                | Encodes a merr     | 5_18603621 | 10.72 | intergenic        |
| AT3G12560 | TRF-LIKE 9 (TRFL9)                  | Encodes a telor    | 3_3985908  | 10.72 | promoter          |
| AT2G39660 | BOTRYTIS-INDUCED KINASE1 (BIK1)     | Encodes a plasi    | 2_16529400 | 10.71 | proximal promoter |
| AT2G39650 | na                                  | Protein of unkn    | 2_16529400 | 10.71 | five_prime_UTR    |
| AT3G15630 | na                                  | unknown protei     | 3_5297806  | 10.71 | promoter          |
| AT3G15640 | na                                  | Rubredoxin-like    | 3_5297806  | 10.71 | proximal promoter |
| AT3G15620 | UV REPAIR DEFECTIVE 3 (UVR3)        | Required for ph    | 3_5297806  | 10.71 | proximal promoter |
| AT4G33960 | na                                  | unknown protei     | 4_16278918 | 10.7  | intergenic        |
| AT5G65920 | na                                  | ARM repeat sup     | 5_26368366 | 10.7  | proximal promoter |
| AT5G65925 | na                                  | unknown protei     | 5_26368366 | 10.7  | proximal promoter |
| AT5G65930 | ZWICHEL (ZWI)                       | encodes a nove     | 5_26368366 | 10.7  | intergenic        |
| AT4G02890 | (UBQ14)                             | Polyubiquitin qe   | 4_1280157  | 10.69 | promoter          |
| AT5G66055 | ANKYRIN REPEAT PROTEIN (AKRP)       | A locus involv     | 5_26416966 | 10.69 | downstream        |
| AT4G04330 | HOMOLOGUE OF CYANOBACTERIAL R       | Encodes a chl      | 4_2119469  | 10.69 | proximal promoter |
| AT1G78610 | MECHANOSENSITIVE CHANNEL OF SM      | mechanosensiti     | 1_29573157 | 10.69 | proximal promoter |
| AT1G22060 | na                                  | LOCATED IN: v      | 1_7782522  | 10.69 | proximal promoter |
| AT1G78620 | na                                  | Protein of unkn    | 1_29573157 | 10.69 | three_prime_UTR   |
| AT4G02880 | na                                  | unknown protei     | 4_1280157  | 10.69 | intergenic        |
| AT2G29510 | na                                  | Protein of unkn    | 2_12634185 | 10.69 | promoter          |
| AT5G66052 | na                                  | unknown protei     | 5_26416966 | 10.69 | downstream        |
| AT5G66053 | na                                  | unknown protei     | 5_26416966 | 10.69 | promoter          |
| AT3G57420 | na                                  | Protein of unkn    | 3_21252076 | 10.68 | intergenic        |
| AT2G37040 | PHE AMMONIA LYASE 1 (pal1)          | Encodes PAL1,      | 2_15562923 | 10.68 | proximal promoter |
| AT3G57410 | VILLIN 3 (VLN3)                     | Encodes a prote    | 3_21252076 | 10.68 | proximal promoter |
| AT2G39990 | EUKARYOTIC TRANSLATION INITIATION   | translation initia | 2_16700877 | 10.67 | proximal promoter |
| AT2G40000 | ORTHOLOG OF SUGAR BEET HS1 PRO      | ortholog of sug    | 2_16700877 | 10.67 | exon              |

|           |                                     |                   |            |       |                   |
|-----------|-------------------------------------|-------------------|------------|-------|-------------------|
| AT5G22630 | AROGENATE DEHYDRATASE 5 (ADT5)      | Encodes a plasi   | 5_7524802  | 10.66 | exon              |
| AT4G27340 | na                                  | Met-10+ like fan  | 4_13685960 | 10.66 | intergenic        |
| AT4G27330 | SPOROCTELESS (SPL)                  | Encodes a puta    | 4_13685960 | 10.66 | proximal promoter |
| AT5G62370 | na                                  | Tetratricopeptid  | 5_25038922 | 10.65 | intergenic        |
| AT5G62350 | na                                  | Plant invertase/  | 5_25038922 | 10.65 | intergenic        |
| AT5G62360 | na                                  | Plant invertase/  | 5_25038922 | 10.65 | proximal promoter |
| AT4G33625 | na                                  | FUNCTIONS IN      | 4_16154947 | 10.65 | promoter          |
| AT5G43450 | na                                  | encodes a prote   | 5_17458932 | 10.65 | promoter          |
| AT5G43455 | na                                  | pre-tRNA; tRNA    | 5_17458932 | 10.65 | intergenic        |
| AT5G27030 | TOPLESS-RELATED 3 (TPR3)            | TOPLESS-relat     | 5_9515667  | 10.65 | promoter          |
| AT5G24590 | TCV-INTERACTING PROTEIN (TIP)       | Member of NAc     | 5_8419061  | 10.64 | promoter          |
| AT1G75750 | GAST1 PROTEIN HOMOLOG 1 (GASA1)     | GA-responsive     | 1_28444535 | 10.63 | proximal promoter |
| AT3G44705 | na                                  | transposable elk  | 3_16250222 | 10.63 | downstream        |
| AT3G44710 | na                                  | Plant protein of  | 3_16250222 | 10.63 | intergenic        |
| AT1G77480 | na                                  | Eukaryotic aspa   | 1_29117512 | 10.62 | promoter          |
| AT1G79170 | na                                  | unknown proteir   | 1_29781867 | 10.62 | promoter          |
| AT3G16940 | na                                  | calmodulin bindi  | 3_5781191  | 10.62 | proximal promoter |
| AT4G30790 | na                                  | INVOLVED IN: :    | 4_14999347 | 10.62 | proximal promoter |
| AT1G77490 | THYLAKOIDAL ASCORBATE PEROXIDA      | Encodes a chlor   | 1_29117512 | 10.62 | promoter          |
| AT5G48250 | na                                  | B-box type zinc   | 5_19563930 | 10.61 | promoter          |
| AT5G02760 | na                                  | Protein phosph    | 5_624681   | 10.61 | proximal promoter |
| AT5G16230 | na                                  | Plant stearoyl-a  | 5_5306741  | 10.61 | intergenic        |
| AT5G16235 | na                                  | Potential natura  | 5_5306741  | 10.61 | proximal promoter |
| AT5G16240 | na                                  | Plant stearoyl-a  | 5_5306741  | 10.61 | promoter          |
| AT2G41170 | na                                  | F-box family prc  | 2_17161272 | 10.6  | promoter          |
| AT2G41178 | na                                  | Potential natura  | 2_17161272 | 10.6  | intergenic        |
| AT4G32300 | S-DOMAIN-2 5 (SD2-5)                | S-domain-2 5 (    | 5_15599458 | 10.6  | promoter          |
| AT2G41180 | SIGMA FACTOR BINDING PROTEIN 2 (S   | VQ motif-contai   | 2_17161272 | 10.6  | intergenic        |
| AT2G44080 | ARGOS-LIKE (ARL)                    | Encodes ARL, ε    | 2_18236933 | 10.59 | promoter          |
| AT5G02610 | na                                  | Ribosomal L29     | 5_589076   | 10.59 | intergenic        |
| AT5G41140 | na                                  | Myosin heavy c    | 5_16466540 | 10.59 | proximal promoter |
| AT5G02615 | na                                  | pre-tRNA; tRNA    | 5_589076   | 10.59 | promoter          |
| AT5G20180 | na                                  | Ribosomal prote   | 5_6812432  | 10.59 | intergenic        |
| AT5G20181 | na                                  | This gene encod   | 5_6812432  | 10.59 | exon              |
| AT4G16780 | HOMEODOMAIN PROTEIN 2 (HB-2)        | Encodes a hom     | 4_9443449  | 10.58 | intergenic        |
| AT3G15540 | INDOLE-3-ACETIC ACID INDUCIBLE 19 ( | Primary auxin-ri  | 3_5263890  | 10.58 | promoter          |
| AT3G03626 | na                                  | unknown proteir   | 3_877578   | 10.58 | exon              |
| AT3G48580 | XYLOGLUCAN ENDOTRANSGLUCOSYL        | xyloglucan endc   | 3_18006467 | 10.58 | proximal promoter |
| AT1G70300 | K+ UPTAKE PERMEASE 6 (KUP6)         | potassium trans   | 1_26477633 | 10.57 | intergenic        |
| AT1G70290 | TREHALOSE-6-PHOSPHATASE SYNTHA      | Encodes an enz    | 1_26477633 | 10.57 | proximal promoter |
| AT1G74670 | GA-STIMULATED ARABIDOPSIS 6 (GAS    | Gibberellin-requ  | 1_28052430 | 10.56 | proximal promoter |
| AT3G16370 | na                                  | GDSL-like Lipas   | 3_5556650  | 10.56 | promoter          |
| AT4G37580 | HOOKLESS 1 (HLS1)                   | involved in apic  | 4_17657863 | 10.54 | proximal promoter |
| AT1G75530 | na                                  | Forkhead-assoc    | 1_28358539 | 10.54 | proximal promoter |
| AT5G20950 | na                                  | Glycosyl hydrol   | 5_7109480  | 10.54 | intron            |
| AT5G23930 | na                                  | Mitochondrial tr  | 5_8077731  | 10.54 | proximal promoter |
| AT5G23940 | PERMEABLE LEAVES3 (PEL3)            | Encodes PERM      | 5_8077731  | 10.54 | intron            |
| AT5G07290 | MEI2-LIKE 4 (ML4)                   | AML4 A memb       | 5_2290831  | 10.53 | proximal promoter |
| AT1G33607 | na                                  | Encodes a defe    | 1_12184290 | 10.53 | intergenic        |
| AT3G56710 | SIGMA FACTOR BINDING PROTEIN 1 (S   | Sig1 binding prc  | 3_21007760 | 10.53 | promoter          |
| AT2G40970 | (MYBC1)                             | MYBC1; CONT       | 2_17099371 | 10.52 | proximal promoter |
| AT3G13720 | (PRA8)                              | PRA8; CONTAI      | 3_4496207  | 10.52 | promoter          |
| AT2G26330 | ERECTA (ER)                         | Homologous to     | 2_11214393 | 10.52 | promoter          |
| AT1G68872 | na                                  | Unknown gene      | 1_25890565 | 10.52 | exon              |
| AT2G26340 | na                                  | unknown proteir   | 2_11214393 | 10.52 | proximal promoter |
| AT1G51510 | (Y14)                               | This gene is pre  | 1_19105622 | 10.51 | proximal promoter |
| AT5G11260 | ELONGATED HYPOCOTYL 5 (HY5)         | Basic leucine zi  | 5_3595179  | 10.51 | promoter          |
| AT3G56360 | na                                  | unknown proteir   | 3_20896205 | 10.51 | promoter          |
| AT1G75891 | na                                  | Potential natura  | 1_28496267 | 10.51 | proximal promoter |
| AT5G11270 | OVEREXPRESSOR OF CATIONIC PERO      | Encodes a hom     | 5_3595179  | 10.51 | downstream        |
| AT2G28830 | PLANT U-BOX 12 (PUB12)              | Encodes a U-bc    | 2_12370747 | 10.51 | promoter          |
| AT5G04560 | DEMETER (DME)                       | Encodes a DNA     | 5_1308427  | 10.5  | proximal promoter |
| AT2G46780 | na                                  | RNA-binding (R    | 2_19227539 | 10.5  | proximal promoter |
| AT2G05786 | na                                  | unknown proteir   | 2_2198349  | 10.49 | exon              |
| AT1G70590 | na                                  | F-box family prc  | 1_26617637 | 10.48 | proximal promoter |
| AT3G23820 | UDP-D-GLUCURONATE 4-EPIMERASE (     | UDP-D-glucuroi    | 3_8605245  | 10.48 | three_prime_UTR   |
| AT5G58140 | PHOTOTROPIN 2 (PHOT2)               | Membrane-bou      | 5_23524287 | 10.47 | promoter          |
| AT5G58130 | REPRESSOR OF SILENCING 3 (ROS3)     | Encodes ROS3      | 5_23524287 | 10.47 | promoter          |
| AT1G55740 | SEED IMBIBITION 1 (SIP1)            | seed imbibition   | 1_20838774 | 10.46 | five_prime_UTR    |
| AT2G28950 | EXPANSIN A6 (EXPA6)                 | Encodes an exp    | 2_12433901 | 10.45 | promoter          |
| AT1G69760 | na                                  | unknown proteir   | 1_26243616 | 10.45 | proximal promoter |
| AT2G16660 | na                                  | Major facilitator | 2_7219708  | 10.45 | intron            |
| AT2G16650 | PROTEINACEOUS RNASE P 2 (PRORP2     | Encodes a prot    | 2_7219708  | 10.45 | proximal promoter |
| AT5G28640 | ANGUSTIFOLIA 3 (AN3)                | Encodes a prot    | 5_10648802 | 10.44 | intron            |
| AT3G47250 | na                                  | Plant protein of  | 3_17401854 | 10.44 | promoter          |
| AT3G54320 | WRINKLED 1 (WR1)                    | WRINKLED1 er      | 3_20117046 | 10.44 | intron            |
| AT5G01260 | na                                  | Carbohydrate-b    | 5_105157   | 10.43 | promoter          |
| AT1G78230 | na                                  | Outer arm dyne    | 1_29429411 | 10.43 | proximal promoter |
| AT3G07010 | na                                  | Pectin lyase-like | 3_2215617  | 10.43 | intron            |
| AT4G18890 | BES1/BZR1 HOMOLOG 3 (BEH3)          | BES1/BZR1 hor     | 4_10352060 | 10.42 | proximal promoter |
| AT4G39120 | MYO-INOSITOL MONOPHOSPHATASE L      | Encodes a chlor   | 4_18220353 | 10.4  | intergenic        |
| AT1G55340 | na                                  | Protein of unkn   | 1_20651534 | 10.4  | promoter          |
| AT4G39100 | SHORT LIFE (SHL1)                   | Putative transcr  | 4_18220353 | 10.4  | promoter          |
| AT5G05190 | na                                  | Protein of unkn   | 5_1540805  | 10.39 | proximal promoter |
| AT5G62340 | na                                  | Plant invertase/  | 5_25035850 | 10.39 | intergenic        |
| AT1G01720 | (ATAF1)                             | Belongs to a lar  | 1_268244   | 10.38 | promoter          |
| AT1G13740 | ABI FIVE BINDING PROTEIN 2 (AFP2)   | Encodes a merr    | 1_4713189  | 10.38 | promoter          |
| AT1G01725 | na                                  | unknown proteir   | 1_268244   | 10.38 | intergenic        |
| AT1G01710 | na                                  | Acyl-CoA thioes   | 1_268244   | 10.38 | intergenic        |
| AT3G60760 | na                                  | unknown proteir   | 3_22457965 | 10.38 | intergenic        |
| AT3G60750 | na                                  | Transketolase; i  | 3_22457965 | 10.38 | intergenic        |
| AT4G11280 | 1-AMINOCYCLOPROPANE-1-CARBOXYL      | encodes a me      | 4_6863982  | 10.36 | promoter          |
| AT2G36880 | METHIONINE ADENOSYLTRANSFERAS       | methionine ader   | 2_15481521 | 10.36 | promoter          |
| AT2G36881 | na                                  | unknown proteir   | 2_15481521 | 10.36 | downstream        |

|           |                                     |                               |       |                   |
|-----------|-------------------------------------|-------------------------------|-------|-------------------|
| AT2G40120 | na                                  | Protein kinase s 2_16759127   | 10.36 | proximal promoter |
| AT2G30530 | na                                  | unknown proteir 2_13006690    | 10.36 | proximal promoter |
| AT5G44680 | na                                  | DNA glycosylas 5_18028283     | 10.36 | proximal promoter |
| AT3G43720 | na                                  | Bifunctional inhi 3_15618207  | 10.36 | proximal promoter |
| AT5G19160 | TRICHOME BIREFRINGENCE-LIKE 11 (T   | Encodes a mem 5_6430459       | 10.36 | promoter          |
| AT1G19180 | JASMONATE-ZIM-DOMAIN PROTEIN 1 (    | JAZ1 is a nucle; 1_6621020    | 10.35 | proximal promoter |
| AT1G03440 | na                                  | Leucine-rich re; 1_851775     | 10.35 | proximal promoter |
| AT4G22190 | na                                  | unknown proteir 4_11745518    | 10.35 | proximal promoter |
| AT4G22200 | POTASSIUM TRANSPORT 2/3 (KT2/3)     | Encodes AKT2_4_11745518       | 10.35 | intergenic        |
| AT3G26810 | AUXIN SIGNALING F-BOX 2 (AFB2)      | auxin signaling   3_9867643   | 10.34 | promoter          |
| AT4G25470 | C-REPEAT/DRE BINDING FACTOR 2 (CF   | Encodes a mem 4_13016343      | 10.34 | promoter          |
| AT1G73600 | na                                  | S-adenosyl-L-m 1_27667759     | 10.34 | proximal promoter |
| AT5G50860 | na                                  | Protein kinase s 5_20698625   | 10.34 | proximal promoter |
| AT3G23030 | INDOLE-3-ACETIC ACID INDUCIBLE 2 (I | auxin inducible ; 3_8182904   | 10.33 | proximal promoter |
| AT2G27700 | na                                  | eukaryotic trans 2_11813279   | 10.33 | intergenic        |
| AT1G08920 | ERD (EARLY RESPONSE TO DEHYDRA      | Encodes ESL1_1_2867268        | 10.32 | five_prime_UTR    |
| AT1G73530 | na                                  | RNA-binding (R 1_27647129     | 10.32 | proximal promoter |
| AT1G73540 | NUDIX HYDROLASE HOMOLOG 21 (NUI     | nudix hydrolase 1_27647129    | 10.32 | promoter          |
| AT5G13300 | SCARFACE (SFC)                      | Belongs to 15-r 5_4262572     | 10.32 | promoter          |
| AT1G70920 | HOMEODOMAIN-LEUCINE ZIPPER PROTEI   | homeobox-leuci 1_26737238     | 10.31 | intron            |
| AT5G01240 | LIKE AUXIN RESISTANT 1 (LAX1)       | Encodes LAX1_5_97260          | 10.31 | proximal promoter |
| AT1G68490 | na                                  | unknown proteir 1_25691374    | 10.31 | proximal promoter |
| AT1G78080 | RELATED TO AP2 4 (RAP2.4)           | Encodes a mem 1_29367282      | 10.31 | intergenic        |
| AT1G21100 | INDOLE GLUCOSINOLATE O-METHYLTI     | O-methyltransfe 1_7386711     | 10.3  | downstream        |
| AT1G21090 | na                                  | Cupredoxin sup 1_7386711      | 10.3  | downstream        |
| AT2G27770 | na                                  | Plant protein of 2_11838725   | 10.3  | intergenic        |
| AT1G48490 | na                                  | Protein kinase s 1_17921647   | 10.29 | intergenic        |
| AT1G48480 | RECEPTOR-LIKE KINASE 1 (RKL1)       | Arabidopsis thal 1_17921647   | 10.29 | intergenic        |
| AT1G03730 | na                                  | unknown proteir 1_931767      | 10.28 | five_prime_UTR    |
| AT1G03740 | na                                  | Protein kinase s 1_931767     | 10.28 | proximal promoter |
| AT3G17510 | CBL-INTERACTING PROTEIN KINASE 1    | Encodes a CBL 3_5995593       | 10.27 | proximal promoter |
| AT4G25480 | DEHYDRATION RESPONSE ELEMENT E      | encodes a mem 4_13017958      | 10.27 | intergenic        |
| AT2G28355 | LOW-MOLECULAR-WEIGHT CYSTEINE-      | low-molecular-w 2_12123481    | 10.27 | intergenic        |
| AT4G19395 | MICRORNA168A (MIR168A)              | Encodes a micr 4_10578364     | 10.27 | promoter          |
| AT5G04720 | ADR1-LIKE 2 (ADR1-L2)               | Encodes a mem 5_1360489       | 10.25 | promoter          |
| AT4G36780 | BES1/BZR1 HOMOLOG 2 (BEH2)          | BES1/BZR1 hor 4_17332280      | 10.25 | intergenic        |
| AT4G18540 | na                                  | unknown proteir 4_10223729    | 10.25 | proximal promoter |
| AT5G40250 | na                                  | RING/U-box su; 5_16085541     | 10.25 | promoter          |
| AT4G36770 | na                                  | UDP-Glycosyltr; 4_17332280    | 10.25 | proximal promoter |
| AT5G41450 | na                                  | RING/U-box su; 5_16590732     | 10.24 | proximal promoter |
| AT5G41460 | na                                  | Protein of unkn; 5_16590732   | 10.24 | intron            |
| AT3G62620 | na                                  | sucrose-phosph 3_23159085     | 10.24 | proximal promoter |
| AT3G15770 | na                                  | unknown proteir 3_5339972     | 10.24 | promoter          |
| AT3G15780 | na                                  | unknown proteir 3_5339972     | 10.24 | proximal promoter |
| AT4G34240 | ALDEHYDE DEHYDROGENASE 311 (ALC     | Aldehyde dehyd 4_16389356     | 10.23 | promoter          |
| AT2G39810 | HIGH EXPRESSION OF OSMOTICALLY I    | A novel protein 2_16612610    | 10.23 | promoter          |
| AT2G39805 | na                                  | Integral membr 2_16612610     | 10.23 | promoter          |
| AT2G45730 | na                                  | eukaryotic initial 2_18839380 | 10.22 | promoter          |
| AT1G55546 | na                                  | unknown proteir 1_20745297    | 10.22 | downstream        |
| AT3G06450 | na                                  | HCO3- transpor 3_1980072      | 10.22 | promoter          |
| AT3G06455 | na                                  | ubiquitin family 3_1980072    | 10.22 | promoter          |
| AT2G45740 | PEROXIN 11D (PEX11D)                | member of the ; 2_18839380    | 10.22 | promoter          |
| AT3G15095 | HIGH CHLOROPHYLL FLUORESCENCE       | Encodes HCF2-3_5081697        | 10.21 | promoter          |
| AT3G15110 | na                                  | unknown proteir 3_5081697     | 10.21 | intergenic        |
| AT3G63190 | RIBOSOME RECYCLING FACTOR, CHLC     | The gene encoc 3_23345059     | 10.21 | promoter          |
| AT2G39450 | (MTP11)                             | Encodes a Gol; 2_16473950     | 10.2  | promoter          |
| AT4G26000 | PEPPER (PEP)                        | Encodes a nove 4_13196316     | 10.2  | proximal promoter |
| AT2G39460 | RIBOSOMAL PROTEIN L23AA (RPL23AA    | Encodes a 60S 2_16473950      | 10.2  | promoter          |
| AT1G30825 | DISTORTED TRICHOMES 2 (DIS2)        | Involved in trich 1_10959866  | 10.19 | proximal promoter |
| AT4G37980 | ELICITOR-ACTIVATED GENE 3-1 (ELI3-1 | elicitor-activate 4_17852495  | 10.19 | five_prime_UTR    |
| AT2G17780 | MID1-COMPLEMENTING ACTIVITY 2 (MC   | mid1-compleme 2_7727499       | 10.19 | promoter          |
| AT4G16520 | AUTOPHAGY 8F (ATG8F)                | autophagy 8f (A 4_9308694     | 10.18 | promoter          |
| AT5G64570 | BETA-D-XYLOSIDASE 4 (XYL4)          | Encodes a beta 5_25814479     | 10.18 | proximal promoter |
| AT2G04680 | na                                  | Cysteine/Histidi 2_1640222    | 10.18 | exon              |
| AT4G36780 | BES1/BZR1 HOMOLOG 2 (BEH2)          | BES1/BZR1 hor 4_17334473      | 10.17 | promoter          |
| AT3G57990 | na                                  | unknown proteir 3_21473021    | 10.17 | proximal promoter |
| AT4G36790 | na                                  | Major facilitator 4_17334473  | 10.17 | proximal promoter |
| AT1G30630 | na                                  | Coatomer epsil 1_10860493     | 10.17 | promoter          |
| AT1G30640 | na                                  | Protein kinase f; 1_10860493  | 10.17 | promoter          |
| AT5G05965 | na                                  | unknown proteir 5_1792703     | 10.17 | promoter          |
| AT5G15410 | DEFENSE NO DEATH 1 (DND1)           | 'defense, no dei 5_5006992    | 10.16 | promoter          |
| AT5G15430 | na                                  | Plant calmodulir 5_5006992    | 10.16 | proximal promoter |
| AT5G15420 | na                                  | unknown proteir 5_5006992     | 10.16 | intergenic        |
| AT4G34050 | CAFFEYOYL COENZYME A O-METHYLTR     | caffeoyl coenzy 4_16310620    | 10.15 | promoter          |
| AT1G73360 | HOMEODOMAIN GLABROUS 11 (HDG11      | Encodes a hom 1_27578830      | 10.15 | three_prime_UTR   |
| AT1G73350 | na                                  | unknown proteir 1_27578830    | 10.15 | proximal promoter |
| AT1G69850 | NITRATE TRANSPORTER 1:2 (NRT1:2)    | Encodes an ind 1_26299199     | 10.15 | intron            |
| AT3G13520 | ARABINOGALACTAN PROTEIN 12 (AGP     | Encodes a GPI- 3_4406486      | 10.14 | proximal promoter |
| AT5G64260 | EXORDIUM LIKE 2 (EXL2)              | EXORDIUM like 5_25702707      | 10.14 | proximal promoter |
| AT3G46700 | na                                  | UDP-Glycosyltr; 3_17204724    | 10.14 | proximal promoter |
| AT1G07570 | (APK1A)                             | Protein kinase c 1_2333728    | 10.13 | intron            |
| AT5G67360 | (ARA12)                             | Encodes a subt 5_26872278     | 10.13 | exon              |
| AT1G09560 | GERMIN-LIKE PROTEIN 5 (GLP5)        | germin-like prot 1_3093785    | 10.13 | promoter          |
| AT5G50900 | na                                  | ARM repeat su; 5_20706804     | 10.13 | promoter          |
| AT1G15250 | na                                  | Zinc-binding rib 1_5249665    | 10.13 | promoter          |
| AT1G15260 | na                                  | unknown proteir 1_5249665     | 10.13 | promoter          |
| AT1G65830 | na                                  | pre-tRNA; tRNA 1_24487858     | 10.13 | proximal promoter |
| AT1G07580 | na                                  | pre-tRNA; tRNA 1_2333728      | 10.13 | proximal promoter |
| AT1G15270 | na                                  | Translation mac 1_5249665     | 10.13 | intergenic        |
| AT5G10946 | na                                  | unknown proteir 5_3459240     | 10.13 | proximal promoter |
| AT5G10950 | na                                  | Tudor/PWWP/l; 5_3459240       | 10.13 | downstream        |
| AT1G09570 | PHYTOCHROME A (PHYA)                | Light-labile cyto 1_3093785   | 10.13 | intergenic        |
| AT3G44260 | CCR4- ASSOCIATED FACTOR 1A (CAF1    | Encodes one of 3_15953162     | 10.12 | promoter          |
| AT1G56600 | GALACTINOL SYNTHASE 2 (GolS2)       | GolS2 is a galac 1_21207205   | 10.12 | promoter          |

|           |                                     |                              |       |                   |
|-----------|-------------------------------------|------------------------------|-------|-------------------|
| AT5G16210 | na                                  | HEAT repeat-cc 5_5290470     | 10.12 | intergenic        |
| AT5G16200 | na                                  | 50S ribosomal r 5_5290470    | 10.12 | promoter          |
| AT3G46600 | na                                  | GRAS family tra 3_17157862   | 10.12 | promoter          |
| AT5G62865 | na                                  | unknown protei 5_25235343    | 10.11 | intergenic        |
| AT4G31890 | na                                  | ARM repeat sur 4_15427044    | 10.11 | intron            |
| AT4G11330 | MAP KINASE 5 (MPK5)                 | MAP kinase 4_6891878         | 10.1  | promoter          |
| AT5G49280 | na                                  | hydroxyproline-i 5_19977998  | 10.1  | proximal promoter |
| AT4G23910 | na                                  | unknown protei 4_12430702    | 10.1  | intergenic        |
| AT4G23915 | na                                  | Encodes an ala 4_12430702    | 10.1  | intergenic        |
| AT4G23920 | UDP-D-GLUCOSE/UDP-D-GALACTOSE       | Encodes a prote 4_12430702   | 10.1  | proximal promoter |
| AT1G65590 | BETA-HEXOSAMINIDASE 3 (HEXO3)       | Encodes a prote 1_24387536   | 10.09 | intron            |
| AT3G47340 | GLUTAMINE-DEPENDENT ASPARAGINE      | encodes a gluta 3_17441423   | 10.09 | promoter          |
| AT3G47341 | na                                  | unknown protei 3_17441423    | 10.09 | exon              |
| AT5G03110 | na                                  | FUNCTIONS IN 5_731832        | 10.09 | intergenic        |
| AT5G03120 | na                                  | unknown protei 5_731832      | 10.09 | proximal promoter |
| AT4G03390 | STRUBBELIG-RECEPTOR FAMILY 3 (SR    | STRUBBELIG-r 4_1495499       | 10.09 | promoter          |
| AT3G59340 | na                                  | Eukaryotic prote 3_21931683  | 10.08 | promoter          |
| AT3G59350 | na                                  | Protein kinase s 3_21931683  | 10.08 | proximal promoter |
| AT1G71691 | na                                  | GDSL-like Lipas 1_26952234   | 10.08 | proximal promoter |
| AT5G50740 | na                                  | Heavy metal tra 5_20638402   | 10.07 | promoter          |
| AT2G36400 | GROWTH-REGULATING FACTOR 3 (GR      | Growth regulatr 2_15271093   | 10.06 | intron            |
| AT1G62370 | na                                  | RING/U-box su 1_23072985     | 10.06 | exon              |
| AT2G36390 | STARCH BRANCHING ENZYME 2.1 (SBE    | Encodes a star 2_15271093    | 10.06 | intergenic        |
| AT2G28840 | XB3 ORTHOLOG 1 IN ARABIDOPSIS TH    | XB3 ortholog 1   2_12375648  | 10.06 | proximal promoter |
| AT4G36920 | APETALA 2 (AP2)                     | Encodes a flora 4_17398905   | 10.05 | proximal promoter |
| AT2G22850 | BASIC LEUCINE-ZIPPER 6 (bZIP6)      | basic leucine-zip 2_9731789  | 10.05 | intron            |
| AT5G65630 | GLOBAL TRANSCRIPTION FACTOR GR1     | This gene is pre 5_26230020  | 10.05 | proximal promoter |
| AT2G22840 | GROWTH-REGULATING FACTOR 1 (GR      | Growth regulatr 2_9731789    | 10.05 | intergenic        |
| AT3G05220 | na                                  | Heavy metal tra 3_1488551    | 10.05 | promoter          |
| AT5G19240 | na                                  | Glycoprotein me 5_6470069    | 10.05 | promoter          |
| AT5G19250 | na                                  | Glycoprotein me 5_6470069    | 10.05 | proximal promoter |
| AT5G55040 | na                                  | DNA-binding br 5_22331925    | 10.05 | promoter          |
| AT3G21070 | NAD KINASE 1 (NADK1)                | Encodes a prote 3_7385189    | 10.05 | proximal promoter |
| AT1G69130 | na                                  | pre-tRNA; tRNA 1_25988923    | 10.04 | proximal promoter |
| AT1G63860 | na                                  | Disease resistai 1_23706229  | 10.04 | promoter          |
| AT1G77210 | SUGAR TRANSPORT PROTEIN 14 (STP     | AtSTP14 belong 1_29008343    | 10.04 | intergenic        |
| AT3G61150 | HOMEODOMAIN GLABROUS 1 (HDG1)       | Encodes a hom 3_22635384     | 10.03 | intergenic        |
| AT3G61160 | na                                  | Protein kinase s 3_22635384  | 10.03 | promoter          |
| AT5G05250 | na                                  | unknown protei 5_1558407     | 10.01 | promoter          |
| AT1G27100 | na                                  | Actin cross-linki 1_9408783  | 10.01 | intron            |
| AT3G54200 | na                                  | Late embryo ger 3_20065044   | 10    | proximal promoter |
| AT3G54210 | na                                  | Ribosomal prote 3_20065044   | 10    | intergenic        |
| AT1G02390 | GLYCEROL-3-PHOSPHATE ACYLTRANS      | Encodes a merr 1_480752      | 9.99  | promoter          |
| AT1G80400 | na                                  | RING/U-box su 1_30224121     | 9.99  | proximal promoter |
| AT3G10960 | AZA-GUANINE RESISTANT1 (AZG1)       | Encodes a hom 3_3429034      | 9.98  | proximal promoter |
| AT1G49450 | na                                  | Transducin/WD 1_18307179     | 9.98  | three_prime_UTR   |
| AT1G19490 | na                                  | Basic-leucine zi 1_6754311   | 9.97  | promoter          |
| AT3G08590 | 2,3-BIPHOSPHOGLYCERATE-INDEPEN      | Phosphoglycerc 3_2612157     | 9.96  | proximal promoter |
| AT5G47990 | CYTOCHROME P450, FAMILY 705, SUBF   | encodes a mem 5_19440240     | 9.96  | intergenic        |
| AT3G08600 | na                                  | Protein of unknc 3_2612157   | 9.96  | promoter          |
| AT5G42090 | na                                  | Lung seven trar 5_16828579   | 9.96  | downstream        |
| AT5G42092 | na                                  | Potential natura 5_16828579  | 9.96  | proximal promoter |
| AT1G29395 | COLD REGULATED 314 INNER MEMBR/     | Integral membr 1_10288050    | 9.95  | downstream        |
| AT1G29390 | COLD REGULATED 314 THYLAKOID ME     | Integral membr 1_10288050    | 9.95  | intron            |
| AT1G66500 | na                                  | Pre-mRNA clea 1_24812718     | 9.95  | promoter          |
| AT1G66510 | na                                  | AAR2 protein fa 1_24812718   | 9.95  | promoter          |
| AT5G15220 | na                                  | Ribosomal prote 5_4942964    | 9.95  | promoter          |
| AT3G18710 | PLANT U-BOX 29 (PUB29)              | Encodes a prote 3_6438017    | 9.95  | proximal promoter |
| AT2G23450 | na                                  | Protein kinase s 2_9991351   | 9.94  | intron            |
| AT3G06130 | na                                  | Heavy metal tra 3_1855051    | 9.94  | five_prime_UTR    |
| AT1G15520 | ATP-BINDING CASSETTE G40 (ABCG40    | ABC transporter 1_5339612    | 9.93  | proximal promoter |
| AT3G27170 | CHLORIDE CHANNEL B (CLC-B)          | member of Anio 3_10022674    | 9.93  | proximal promoter |
| AT1G42540 | GLUTAMATE RECEPTOR 3.3 (GLR3.3)     | member of Puta 1_15976966    | 9.93  | intergenic        |
| AT5G01880 | na                                  | RING/U-box su 5_339400       | 9.93  | exon              |
| AT5G01881 | na                                  | unknown protei 5_339400      | 9.93  | promoter          |
| AT1G15530 | na                                  | Concanavalin A 1_5339612     | 9.93  | intergenic        |
| AT5G39050 | PHENOLIC GLUCOSIDE MALONYLTRAN      | Encodes a malc 5_15630834    | 9.93  | intergenic        |
| AT1G42550 | PLASTID MOVEMENT IMPAIRED1 (PM1     | Encodes a pian 1_15976966    | 9.93  | promoter          |
| AT1G12610 | DWARF AND DELAYED FLOWERING 1 (     | Encodes a merr 1_4289479     | 9.91  | intergenic        |
| AT2G35470 | na                                  | unknown protei 2_14908762    | 9.91  | downstream        |
| AT2G35480 | na                                  | unknown protei 2_14908762    | 9.91  | proximal promoter |
| AT2G29660 | na                                  | zinc finger (C2F 2_12680350  | 9.91  | exon              |
| AT3G49870 | ADP-RIBOSYLATION FACTOR-LIKE A1C    | A member of Af 3_18494415    | 9.9   | promoter          |
| AT3G61580 | SPHINGOID LCB DESATURASE 1 (SLD1    | Fatty acid/sphin 3_22785851  | 9.9   | promoter          |
| AT3G24503 | ALDEHYDE DEHYDROGENASE 2C4 (AL      | Arabidopsis tha 3_8923152    | 9.88  | promoter          |
| AT3G62630 | na                                  | Protein of unknc 3_23162932  | 9.88  | intergenic        |
| AT2G22080 | na                                  | unknown protei 2_9386480     | 9.88  | promoter          |
| AT2G33570 | na                                  | Domain of unknc 2_14216682   | 9.88  | proximal promoter |
| AT2G22430 | HOMEOBOX PROTEIN 6 (HB6)            | Encodes a hom 2_9527842      | 9.87  | promoter          |
| AT2G47440 | na                                  | Tetrapeptide 2_19469711      | 9.87  | promoter          |
| AT4G39838 | na                                  | Potential natura 4_18487053  | 9.87  | proximal promoter |
| AT4G39840 | na                                  | unknown protei 4_18487053    | 9.87  | intergenic        |
| AT1G52890 | NAC DOMAIN CONTAINING PROTEIN 15    | encodes a NAC 1_19699380     | 9.87  | proximal promoter |
| AT4G26610 | D6 PROTEIN KINASE LIKE 1 (D6PKL1)   | D6 protein kinas 4_13423935  | 9.85  | proximal promoter |
| AT4G26600 | na                                  | S-adenosyl-L-m 4_13423935    | 9.85  | downstream        |
| AT1G64090 | RETICULAN LIKE PROTEIN B3 (RTNLB3   | Reticulan like pr 1_23789186 | 9.85  | intron            |
| AT3G16720 | TOXICOS EN LEVADURA 2 (ATL2)        | RING-H2 protei 3_5693834     | 9.85  | three_prime_UTR   |
| AT4G21437 | na                                  | unknown pseu 4_11417356      | 9.84  | intron            |
| AT2G47480 | na                                  | Protein of unknc 2_19485602  | 9.84  | proximal promoter |
| AT2G47485 | na                                  | unknown protei 2_19485602    | 9.84  | promoter          |
| AT2G47490 | NAD+ TRANSPORTER 1 (NDT1)           | Encodes a chloi 2_19485602   | 9.84  | proximal promoter |
| AT2G47470 | UNFERTILIZED EMBRYO SAC 5 (UNES)    | Encodes a prote 2_19485602   | 9.84  | intergenic        |
| AT5G65670 | INDOLE-3-ACETIC ACID INDUCIBLE 9 (I | auxin (indole-3- 5_26253395  | 9.83  | promoter          |
| AT1G62660 | na                                  | Glycosyl hydrok 1_23200993   | 9.83  | intron            |

|           |                                     |                   |            |      |                   |
|-----------|-------------------------------------|-------------------|------------|------|-------------------|
| AT5G05480 | na                                  | Peptide-N4-(N-i   | 5_1624353  | 9.83 | promoter          |
| AT1G44760 | na                                  | Adenine nucleoi   | 1_16898610 | 9.83 | five_prime_UTR    |
| AT4G08910 | na                                  | unknown proteir   | 4_5717878  | 9.83 | intergenic        |
| AT5G25615 | na                                  | transposable eir  | 5_8923455  | 9.83 | intergenic        |
| AT4G29190 | OXIDATION-RELATED ZINC FINGER 2 ((  | Zinc finger C-x8  | 4_14393525 | 9.83 | promoter          |
| AT5G05490 | SYNAPTIC 1 (SYN1)                   | Encodes a RAD     | 5_1624353  | 9.83 | exon              |
| AT1G71697 | CHOLINE KINASE 1 (CK1)              | Encodes cholins   | 1_26971194 | 9.82 | promoter          |
| AT2G30040 | MITOGEN-ACTIVATED PROTEIN KINASE    | member of MEK     | 2_12813677 | 9.82 | intergenic        |
| AT2G30020 | na                                  | Encodes AP2C      | 2_12813677 | 9.82 | proximal promoter |
| AT2G30032 | na                                  | unknown proteir   | 2_12813677 | 9.82 | intergenic        |
| AT5G44680 | na                                  | DNA glycosylas    | 5_18026132 | 9.82 | promoter          |
| AT5G45660 | na                                  | unknown proteir   | 5_18527619 | 9.82 | intergenic        |
| AT5G45670 | na                                  | GDSL-like Lipas   | 5_18527619 | 9.82 | proximal promoter |
| AT5G19780 | TUBULIN ALPHA-5 (TUA5)              | Encodes an isol   | 5_6686956  | 9.82 | promoter          |
| AT2G45660 | AGAMOUS-LIKE 20 (AGL20)             | Controls floweri  | 2_18806888 | 9.81 | intergenic        |
| AT2G45650 | AGAMOUS-LIKE 6 (AGL6)               | Sequence sugg     | 2_18806888 | 9.81 | intergenic        |
| AT2G27050 | ETHYLENE-INSENSITIVE3-LIKE 1 (EIL1) | ethylene-insens   | 2_11548788 | 9.81 | intergenic        |
| AT2G27060 | na                                  | Leucine-rich ref  | 2_11548788 | 9.81 | proximal promoter |
| AT5G60760 | na                                  | P-loop containir  | 5_24436881 | 9.81 | proximal promoter |
| AT5G63980 | (SAL1)                              | Encodes a bifur   | 5_25609481 | 9.8  | promoter          |
| AT4G19112 | CONSERVED PEPTIDE UPSTREAM OPE      | Upstream open     | 4_10459414 | 9.8  | promoter          |
| AT5G54510 | DWARF IN LIGHT 1 (DFL1)             | Encodes an IAA    | 5_22134790 | 9.8  | proximal promoter |
| AT5G09590 | MITOCHONDRIAL HSO70 2 (MTHSC70-2)   | heat shock prot   | 5_2975183  | 9.8  | promoter          |
| AT4G19110 | na                                  | Protein kinase s  | 4_10459414 | 9.8  | promoter          |
| AT5G09585 | U2 SMALL NUCLEOLAR RNAs (U2.5)      | U2.5; snRNA; g    | 5_2975183  | 9.8  | exon              |
| AT4G33200 | (X1-I)                              | member of Myo     | 4_16002373 | 9.79 | downstream        |
| AT4G30490 | na                                  | AFG1-like ATPe    | 4_14902678 | 9.79 | proximal promoter |
| AT4G30500 | na                                  | Protein of unkn   | 4_14902678 | 9.79 | proximal promoter |
| AT5G54580 | na                                  | RNA-binding (R    | 5_22173306 | 9.79 | intergenic        |
| AT5G54585 | na                                  | unknown proteir   | 5_22173306 | 9.79 | proximal promoter |
| AT4G33180 | na                                  | alpha/beta-Hydi   | 4_16002373 | 9.79 | downstream        |
| AT5G60850 | OBF BINDING PROTEIN 4 (OBP4)        | Encodes a zinc    | 5_24480344 | 9.79 | promoter          |
| AT1G76185 | na                                  | unknown proteir   | 1_28588669 | 9.78 | proximal promoter |
| AT5G13080 | WRKY DNA-BINDING PROTEIN 75 (WRK    | WRKY75 is one     | 5_4151792  | 9.78 | proximal promoter |
| AT1G67940 | ATP-BINDING CASSETTE I17 (ABCI17)   | member of NAP     | 1_25477637 | 9.77 | promoter          |
| AT5G20330 | BETA-1,3-GLUCANASE 4 (BETAG4)       | beta-1,3-glucan   | 5_6871022  | 9.77 | proximal promoter |
| AT1G67930 | na                                  | Golgi transport   | 1_25477637 | 9.77 | promoter          |
| AT3G56880 | na                                  | VQ motif-contai   | 3_21059964 | 9.77 | five_prime_UTR    |
| AT4G31800 | WRKY DNA-BINDING PROTEIN 18 (WRK    | Pathogen-induc    | 4_15381518 | 9.77 | proximal promoter |
| AT1G51700 | DOF ZINC FINGER PROTEIN 1 (DOF1)    | Encodes dof zin   | 1_19175416 | 9.75 | downstream        |
| AT3G04730 | INDOLEACETIC ACID-INDUCED PROTEI    | early auxin-indu  | 3_1292091  | 9.75 | proximal promoter |
| AT1G73060 | LOW PSII ACCUMULATION 3 (LPA3)      | Low PSII Accur    | 1_27478826 | 9.75 | promoter          |
| AT3G04721 | na                                  | unknown proteir   | 3_1292091  | 9.75 | intergenic        |
| AT3G04732 | na                                  | unknown proteir   | 3_1292091  | 9.75 | intergenic        |
| AT5G67630 | na                                  | P-loop containir  | 5_26967185 | 9.75 | downstream        |
| AT5G67620 | na                                  | unknown proteir   | 5_26967185 | 9.75 | proximal promoter |
| AT1G51710 | UBIQUITIN-SPECIFIC PROTEASE 6 (UBF  | Ubiquitin-specif  | 1_19175416 | 9.75 | downstream        |
| AT3G58750 | CITRATE SYNTHASE 2 (CSY2)           | Encodes a pero    | 3_21727813 | 9.74 | promoter          |
| AT1G29690 | CONSTITUTIVELY ACTIVATED CELL DE    | Encodes a prote   | 1_10374939 | 9.74 | intergenic        |
| AT4G09965 | na                                  | unknown proteir   | 4_6245698  | 9.74 | promoter          |
| AT4G09970 | na                                  | unknown proteir   | 4_6245698  | 9.74 | promoter          |
| AT1G29670 | na                                  | GDSL-like Lipas   | 1_10374939 | 9.74 | proximal promoter |
| AT1G29680 | na                                  | Protein of unkn   | 1_10374939 | 9.74 | intergenic        |
| AT5G08150 | SUPPRESSOR OF PHYTOCHROME B 5       | Encodes SOB5      | 5_2623623  | 9.74 | proximal promoter |
| AT1G21470 | na                                  | BEST Arabidop:    | 1_7515760  | 9.73 | intergenic        |
| AT3G16270 | na                                  | ENTH/VHS fam      | 3_5513242  | 9.73 | promoter          |
| AT3G61840 | na                                  | Protein of unkn   | 3_22893759 | 9.73 | intergenic        |
| AT3G16260 | TRNASE Z4 (TRZ4)                    | Encodes a tRN:    | 3_5513242  | 9.73 | downstream        |
| AT4G31550 | WRKY DNA-BINDING PROTEIN 11 (WRK    | member of WR1     | 4_15292644 | 9.73 | proximal promoter |
| AT1G19350 | BRI1-EMS-SUPPRESSOR 1 (BES1)        | Encodes brassi    | 1_6687260  | 9.72 | proximal promoter |
| AT1G22651 | na                                  | unknown proteir   | 1_8016825  | 9.72 | intergenic        |
| AT1G22660 | na                                  | Polynucleotide    | 1_8016825  | 9.72 | proximal promoter |
| AT3G57630 | na                                  | exostosin fami    | 3_21344156 | 9.72 | promoter          |
| AT1G19340 | na                                  | Methyltransfera   | 1_6687260  | 9.72 | downstream        |
| AT3G14860 | na                                  | NHL domain-co     | 3_5002214  | 9.72 | proximal promoter |
| AT3G14870 | na                                  | Plant protein of  | 3_5002214  | 9.72 | promoter          |
| AT1G13260 | RELATED TO ABI3/VP1 1 (RAV1)        | Encodes an AP:    | 1_4542032  | 9.72 | promoter          |
| AT3G59970 | METHYLENETETRAHYDROFOLATE RED       | methylenetetra    | 3_22150707 | 9.71 | promoter          |
| AT1G01490 | na                                  | Heavy metal tra   | 1_183471   | 9.71 | proximal promoter |
| AT4G29130 | HEXOKINASE 1 (HXK1)                 | Encodes a hexc    | 4_14359719 | 9.7  | intergenic        |
| AT5G43020 | na                                  | Leucine-rich ref  | 5_17257916 | 9.7  | promoter          |
| AT1G77630 | LYSIN-MOTIF (LYSM) DOMAIN PROTEIN   | Encodes a lysin   | 1_29173264 | 9.69 | promoter          |
| AT5G62280 | na                                  | Protein of unkn   | 5_25019236 | 9.69 | intergenic        |
| AT5G62290 | na                                  | nucleotide-sens   | 5_25019236 | 9.69 | promoter          |
| AT5G44130 | FASCICLIN-LIKE ARABINOGLACTAN P     | FASCICLIN-like    | 5_17759549 | 9.68 | proximal promoter |
| AT4G30200 | VERNALIZATION5/VIN3-LIKE 1 (VEL1)   | Encodes a prote   | 4_14790585 | 9.68 | promoter          |
| AT1G73965 | CLAVATA3/ESR-RELATED 13 (CLE13)     | Member of a lar   | 1_27816669 | 9.67 | downstream        |
| AT2G02080 | INDETERMINATE(ID)-DOMAIN 4 (IDD4)   | indeterminate(I   | 2_519600   | 9.67 | intron            |
| AT1G73970 | na                                  | unknown proteir   | 1_27816669 | 9.67 | promoter          |
| AT4G15545 | na                                  | unknown proteir   | 4_8875607  | 9.67 | promoter          |
| AT4G30430 | TETRASPANIN9 (TET9)                 | Member of TET     | 4_14884714 | 9.67 | intergenic        |
| AT4G30440 | UDP-D-GLUCURONATE 4-EPIMERASE 1     | UDP-D-glucuroi    | 4_14884714 | 9.67 | proximal promoter |
| AT3G08970 | (ATERDJ3A)                          | J domain protei   | 3_2737195  | 9.66 | promoter          |
| AT5G62530 | ALDEHYDE DEHYDROGENASE 12A1 (A      | Encodes mitoch    | 5_25097644 | 9.66 | intergenic        |
| AT4G33430 | BRI1-ASSOCIATED RECEPTOR KINASE     | Leu-rich recept   | 4_16090892 | 9.66 | promoter          |
| AT3G50690 | na                                  | Leucine-rich ref  | 3_18837506 | 9.66 | promoter          |
| AT4G33440 | na                                  | Pectin lyase-like | 4_16090892 | 9.66 | proximal promoter |
| AT3G54010 | PASTICCINO 1 (PAS1)                 | Immunophilin-li   | 3_19999743 | 9.66 | proximal promoter |
| AT5G62520 | SIMILAR TO RCD ONE 5 (SRO5)         | Encodes a prote   | 5_25097644 | 9.66 | promoter          |
| AT4G33050 | EMBRYO SAC DEVELOPMENT ARREST       | Encodes a calm    | 4_15947169 | 9.65 | promoter          |
| AT2G01810 | na                                  | RING/FYVE/PH      | 2_347498   | 9.65 | promoter          |
| AT5G02460 | na                                  | Dof-type zinc fir | 5_537185   | 9.64 | intergenic        |
| AT3G50480 | HOMOLOG OF RPW8 4 (HR4)             | Homolog of RPI    | 3_18733011 | 9.63 | promoter          |
| AT3G51670 | na                                  | SEC14 cytosolic   | 3_19168337 | 9.63 | proximal promoter |

|           |                                    |                   |               |      |                   |
|-----------|------------------------------------|-------------------|---------------|------|-------------------|
| AT1G56630 | na                                 | alpha/beta-Hydr   | 1_21228185    | 9.62 | proximal promoter |
| AT2G32580 | na                                 | Protein of unkn   | 2_13826280    | 9.62 | proximal promoter |
| AT2G32560 | na                                 | F-box family prc  | 2_13826280    | 9.62 | intron            |
| AT5G23870 | na                                 | Pectinacetyl      | 5_8048901     | 9.62 | intron            |
| AT5G55400 | na                                 | Actin binding C   | 5_22459531    | 9.62 | proximal promoter |
| AT2G46720 | 3-KETOACYL-COA SYNTHASE 13 (KCS1)  | Encodes KCS1      | 1_2_19198234  | 9.61 | five_prime_UTR    |
| AT3G21100 | na                                 | RNA-binding (R    | 3_7397487     | 9.61 | proximal promoter |
| AT2G27310 | na                                 | F-box family prc  | 2_11684227    | 9.6  | exon              |
| AT1G55810 | URIDINE KINASE-LIKE 3 (UKL3)       | One of the hom    | 1_20860486    | 9.6  | promoter          |
| AT1G05065 | CLAVATA3/ESR-RELATED 20 (CLE20)    | Member of a lar   | 1_1455933     | 9.59 | proximal promoter |
| AT1G02350 | na                                 | protoporphyrin    | o_1_468894    | 9.59 | proximal promoter |
| AT5G47229 | na                                 | This gene enc     | 5_19178239    | 9.59 | intergenic        |
| AT1G05070 | na                                 | Protein of unkn   | 1_1455933     | 9.59 | intergenic        |
| AT2G34720 | NUCLEAR FACTOR Y, SUBUNIT A4 (NF-  | nuclear factor Y  | 2_14651946    | 9.59 | promoter          |
| AT4G01070 | (GT72B1)                           | the glycosyltran  | 4_465131      | 9.58 | proximal promoter |
| AT3G56260 | na                                 | unknown protein   | 3_20869720    | 9.58 | proximal promoter |
| AT3G56270 | na                                 | Plant protein of  | 3_20869720    | 9.58 | promoter          |
| AT4G14230 | na                                 | FUNCTIONS IN      | 4_8203380     | 9.58 | promoter          |
| AT3G56800 | CALMODULIN 3 (CAM3)                | encodes a calm    | 3_21036228    | 9.57 | promoter          |
| AT5G65460 | KINESIN LIKE PROTEIN FOR ACTIN BAS | Kinesin that bin  | 5_26169766    | 9.57 | proximal promoter |
| AT3G51600 | LIPID TRANSFER PROTEIN 5 (LTP5)    | Predicted to enc  | 3_19137435    | 9.57 | intergenic        |
| AT3G26511 | na                                 | unknown protein   | 3_9714068     | 9.57 | proximal promoter |
| AT4G22780 | ACT DOMAIN REPEAT 7 (ACR7)         | Member of a far   | 4_11971534    | 9.56 | promoter          |
| AT1G08490 | CHLOROPLASTIC NIFS-LIKE CYSTEINE   | Chloroplastic Ni  | 1_2688789     | 9.56 | promoter          |
| AT1G08500 | EARLY NODULIN-LIKE PROTEIN 18 (EN  | early nodulin-lik | 1_2688789     | 9.56 | promoter          |
| AT4G24972 | TAPETUM DETERMINANT 1 (TPD1)       | Encodes a nove    | 4_12836875    | 9.56 | promoter          |
| AT4G14680 | (APS3)                             | ATP sulfurylase   | 4_8415936     | 9.55 | proximal promoter |
| AT5G66320 | GATA TRANSCRIPTION FACTOR 5 (GAT   | Encodes GATA      | 5_26500292    | 9.55 | proximal promoter |
| AT5G66330 | na                                 | Leucine-rich re   | 5_26500292    | 9.55 | downstream        |
| AT1G02560 | NUCLEAR ENCODED CLP PROTEASE 5     | One of several    | 1_537753      | 9.55 | promoter          |
| AT4G15620 | na                                 | Uncharacterise    | 4_8914867     | 9.54 | intron            |
| AT5G54470 | na                                 | B-box type zinc   | 5_22116002    | 9.53 | proximal promoter |
| AT1G04990 | na                                 | Zinc finger C-x   | 8_1_1422274   | 9.52 | promoter          |
| AT4G27300 | na                                 | S-locus lectin    | pr_4_13672749 | 9.52 | promoter          |
| AT1G35160 | GF14 PROTEIN PHI CHAIN (GF14 PHI)  | GF14 protein pf   | 1_12867051    | 9.51 | promoter          |
| AT5G62220 | GLYCOSYLTRANSFERASE 18 (GT18)      | Encodes a Golc    | 5_24991190    | 9.51 | proximal promoter |
| AT2G20635 | na                                 | ATP binding;prc   | 2_8900175     | 9.51 | promoter          |
| AT2G17300 | na                                 | unknown protei    | 2_7523050     | 9.51 | promoter          |
| AT2G20630 | PP2C INDUCED BY AVRPPM1 (PIA1)     | PP2C induced t    | 2_8900175     | 9.51 | promoter          |
| AT1G65590 | BETA-HEXOSAMINIDASE 3 (HEXO3)      | Encodes a prot    | 1_24388582    | 9.5  | intron            |
| AT4G39040 | na                                 | RNA-binding Cf    | 4_18191123    | 9.5  | proximal promoter |
| AT3G08730 | PROTEIN-SERINE KINASE 1 (PK1)      | Encodes a prot    | 3_2651208     | 9.5  | intergenic        |
| AT3G08720 | SERINE/THREONINE PROTEIN KINASE    | Encodes a ribos   | 3_2651208     | 9.5  | promoter          |
| AT4G18700 | CBL-INTERACTING PROTEIN KINASE 1   | Encodes CBL-ir    | 4_10288540    | 9.49 | intergenic        |
| AT3G60190 | DYNAMIN-LIKE 1E (DL1E)             | At3g60190 enc     | 3_22248636    | 9.49 | proximal promoter |
| AT3G52370 | FASCICLIN-LIKE ARABINOGLACTAN P    | FASCICLIN-like    | 3_19415077    | 9.49 | proximal promoter |
| AT1G56165 | na                                 | Potential natura  | 1_21024562    | 9.49 | promoter          |
| AT3G60200 | na                                 | unknown protein   | 3_22248636    | 9.49 | proximal promoter |
| AT1G30250 | na                                 | unknown protei    | 1_10649302    | 9.49 | proximal promoter |
| AT3G62650 | na                                 | unknown protei    | 3_23167833    | 9.49 | promoter          |
| AT1G56170 | NUCLEAR FACTOR Y, SUBUNIT C2 (NF-  | Encodes a prot    | 1_21024562    | 9.49 | promoter          |
| AT5G67480 | BTB AND TAZ DOMAIN PROTEIN 4 (BT   | BTB and TAZ di    | 5_26935055    | 9.48 | proximal promoter |
| AT5G67488 | na                                 | Potential natura  | 5_26935055    | 9.48 | downstream        |
| AT5G67490 | na                                 | unknown protei    | 5_26935055    | 9.48 | promoter          |
| AT5G18440 | NUCLEAR FMRP-INTERACTING PROTE     | Encodes NUFIF     | 5_6112632     | 9.48 | promoter          |
| AT5G67500 | VOLTAGE DEPENDENT ANION CHANNEL    | Encodes a volta   | 5_26935055    | 9.48 | promoter          |
| AT1G07720 | 3-KETOACYL-COA SYNTHASE 3 (KCS3)   | Encodes KCS3,     | 1_2390207     | 9.47 | intergenic        |
| AT5G42100 | BETA-1,3-GLUCANASE_PUTATIVE (BG    | encodes a plas    | 5_16831308    | 9.47 | promoter          |
| AT3G26230 | CYTOCHROME P450, FAMILY 71, SUBF   | putative cytochr  | 3_9597955     | 9.47 | downstream        |
| AT3G26220 | CYTOCHROME P450, FAMILY 71, SUBF   | cytochrome P4     | 3_9597955     | 9.47 | promoter          |
| AT5G28620 | na                                 | protein kinase    | C_5_10613931  | 9.47 | proximal promoter |
| AT5G42110 | na                                 | unknown protei    | 5_16831308    | 9.47 | intergenic        |
| AT4G03550 | GLUCAN SYNTHASE-LIKE 5 (GSL05)     | Encodes a call    | 4_1579886     | 9.46 | downstream        |
| AT5G64250 | na                                 | Aldolase-type     | T_5_25701190  | 9.46 | proximal promoter |
| AT1G67580 | na                                 | Protein kinase    | s_1_25332725  | 9.46 | proximal promoter |
| AT1G67590 | na                                 | Remorin family    | 1_25332725    | 9.46 | intergenic        |
| AT5G02240 | na                                 | Protein is tyros  | ii_5_451340   | 9.46 | promoter          |
| AT4G03560 | TWO-PORE CHANNEL 1 (TPC1)          | Encodes a depc    | 4_1579886     | 9.46 | promoter          |
| AT3G20290 | EPS15 HOMOLOGY DOMAIN 1 (EHD1)     | Encodes AtEHC     | 3_7078977     | 9.45 | promoter          |
| AT3G20300 | na                                 | Protein of unkn   | 3_7078977     | 9.45 | intergenic        |
| AT5G57780 | P1R1 (P1R1)                        | Encodes a atyp    | 5_23406428    | 9.45 | promoter          |
| AT5G24910 | CYTOCHROME P450, FAMILY 714, SUBF  | Member of CYP     | 5_8570637     | 9.44 | promoter          |
| AT1G23020 | FERRIC REDUCTION OXIDASE 3 (FRO3   | Encodes a ferric  | 1_8153662     | 9.44 | promoter          |
| AT5G48460 | na                                 | Actin binding C   | 5_19639604    | 9.44 | promoter          |
| AT4G14900 | na                                 | FRIGIDA-like      | pr_4_8523937  | 9.44 | promoter          |
| AT1G69260 | ABI FIVE BINDING PROTEIN (AFP1)    | ABI five binding  | 1_26037829    | 9.43 | proximal promoter |
| AT1G69252 | na                                 | other RNA         | 1_26037829    | 9.43 | downstream        |
| AT1G69270 | RECEPTOR-LIKE PROTEIN KINASE 1 (R  | RPK1 is a leucir  | 1_26037829    | 9.43 | intergenic        |
| AT4G13395 | ROTUNDIFOLIA LIKE 12 (RTFL12)      | ROTUNDIFOLI       | 4_7787424     | 9.43 | proximal promoter |
| AT1G28480 | (GRX480)                           | Encodes GRX4      | 1_10014243    | 9.42 | promoter          |
| AT5G03730 | CONSTITUTIVE TRIPLE RESPONSE 1 (C  | Homologous to     | 5_981725      | 9.42 | proximal promoter |
| AT5G03740 | HISTONE DEACETYLASE 2C (HD2C)      | HD2-type histor   | 5_981725      | 9.42 | promoter          |
| AT1G61350 | na                                 | ARM repeat sur    | 1_22632794    | 9.41 | proximal promoter |
| AT5G22950 | (VPS24.1)                          | VPS24.1; CON      | 5_7680405     | 9.4  | proximal promoter |
| AT1G78280 | na                                 | transferases, tr  | 1_29452662    | 9.4  | five_prime_UTR    |
| AT1G78265 | na                                 | Potential natura  | 1_29452662    | 9.4  | intergenic        |
| AT4G33150 | na                                 | Encodes two pr    | 4_15991938    | 9.4  | promoter          |
| AT3G62260 | na                                 | Protein phosph    | 3_23040879    | 9.4  | promoter          |
| AT4G28910 | NOVEL INTERACTOR OF JAZ (NINJA)    | novel interacto   | 4_14266792    | 9.4  | promoter          |
| AT1G09960 | SUCROSE TRANSPORTER 4 (SUT4)       | low affinity (10  | n_1_3242946   | 9.4  | proximal promoter |
| AT1G78270 | UDP-GLUCOSYL TRANSFERASE 85A4      | UDP-glucosyl tr   | 1_29452662    | 9.4  | promoter          |
| AT4G28730 | GLUTAREDOXIN C5 (GrxC5)            | Encodes a glut    | 4_14198571    | 9.39 | proximal promoter |
| AT3G12110 | ACTIN-11 (ACT11)                   | Encodes an act    | 3_3857598     | 9.38 | promoter          |
| AT2G36230 | ALBINO AND PALE GREEN 10 (APG10)   | Encodes a BBM     | 2_15193393    | 9.38 | intergenic        |



|           |                                    |                              |      |                   |
|-----------|------------------------------------|------------------------------|------|-------------------|
| AT5G65940 | BETA-HYDROXYISOBUTYRYL-COA HYC     | hydrolyzes beta 5_26376477   | 9.38 | downstream        |
| AT1G24400 | LYSINE HISTIDINE TRANSPORTER 2 (LH | High-affinity trar 1_8651270 | 9.38 | downstream        |
| AT3G09970 | na                                 | Calcineurin-like 3_3065640   | 9.38 | downstream        |
| AT1G56150 | na                                 | SAUR-like auxin 1_21016290   | 9.38 | proximal promoter |
| AT2G36220 | na                                 | unknown proteir 2_15193393   | 9.38 | three_prime_UTR   |
| AT1G07250 | UDP-GLUCOSYL TRANSFERASE 71C4 (    | UDP-glucosyl tr 1_2224590    | 9.38 | proximal promoter |
| AT1G07240 | UDP-GLUCOSYL TRANSFERASE 71C5 (    | UDP-glucosyl tr 1_2224590    | 9.38 | exon              |
| AT5G65930 | ZWICHEL (ZWI)                      | encodes a nove 5_26376477    | 9.38 | five_prime_UTR    |
| AT4G37540 | LOB DOMAIN-CONTAINING PROTEIN 35   | LOB domain-co 4_17643365     | 9.37 | proximal promoter |
| AT5G58730 | MYO-INOSITOL KINASE (MIK)          | pkB-like carbof 5_23723232   | 9.37 | downstream        |
| AT5G58720 | na                                 | smr (Small Mut) 5_23723232   | 9.37 | promoter          |
| AT4G37550 | na                                 | Acetamidase/Fc 4_17643365    | 9.37 | promoter          |
| AT4G18630 | na                                 | Protein of unknc 4_10255750  | 9.36 | proximal promoter |
| AT1G28260 | na                                 | Telomerase acti 1_9879285    | 9.36 | promoter          |
| AT1G08500 | EARLY NODULIN-LIKE PROTEIN 18 (EN1 | early nodulin-lik 1_2691148  | 9.35 | intergenic        |
| AT1G08510 | FATTY ACYL-ACP THIOESTERASES B (f  | Encodes an acy 1_2691148     | 9.35 | three_prime_UTR   |
| AT5G15310 | MYB DOMAIN PROTEIN 16 (MYB16)      | Member of the F 5_4977099    | 9.35 | intergenic        |
| AT5G15320 | na                                 | unknown proteir 5_4977099    | 9.35 | promoter          |
| AT4G36988 | CONSERVED PEPTIDE UPSTREAM OPE     | Upstream open 4_17441612     | 9.34 | three_prime_UTR   |
| AT3G59420 | CRINKLY4 (CR4)                     | Encodes a merr 3_21963160    | 9.34 | promoter          |
| AT2G18960 | H(+)-ATPASE 1 (HA1)                | Encodes a plasi 2_8216213    | 9.34 | intergenic        |
| AT4G36990 | HEAT SHOCK FACTOR 4 (HSF4)         | encodes a prote 4_17441612   | 9.34 | three_prime_UTR   |
| AT2G35020 | N-ACETYLGLUCOSAMINE-1-PHOSPHA1     | Encodes a prote 2_14757837   | 9.34 | intron            |
| AT1G12990 | na                                 | beta-1,4-N-acet 1_4433484    | 9.34 | promoter          |
| AT5G56590 | na                                 | O-Glycosyl hydr 5_22907198   | 9.34 | promoter          |
| AT4G37590 | NAKED PINS IN YUC MUTANTS 5 (NPY5  | A member of the 4_17666503   | 9.34 | promoter          |
| AT5G37020 | AUXIN RESPONSE FACTOR 8 (ARF8)     | Encodes a merr 5_14629454    | 9.33 | proximal promoter |
| AT4G32480 | na                                 | Protein of unknc 4_15676284  | 9.33 | promoter          |
| AT5G11160 | ADENINE PHOSPHORIBOSYLTRANSFE      | adenine phosph 5_3550543     | 9.32 | five_prime_UTR    |
| AT5G15230 | GAST1 PROTEIN HOMOLOG 4 (GASA4)    | Encodes gibber 5_4946468     | 9.32 | intergenic        |
| AT3G61890 | HOMEODOMAIN 12 (HB-12)             | Encodes a hom 3_22917431     | 9.32 | proximal promoter |
| AT1G31350 | KAR-UP F-BOX 1 (KUF1)              | KAR-UP F-box 1_11222777      | 9.32 | five_prime_UTR    |
| AT5G15240 | na                                 | Transmembran 5_4946468       | 9.32 | proximal promoter |
| AT3G49790 | na                                 | Carbohydrate-b 3_18468043    | 9.32 | downstream        |
| AT3G49796 | na                                 | This gene encod 3_18468043   | 9.32 | intergenic        |
| AT3G49800 | na                                 | BSD domain-co 3_18468043     | 9.32 | intergenic        |
| AT3G57930 | na                                 | unknown proteir 3_21448771   | 9.31 | promoter          |
| AT3G57940 | na                                 | CONTAINS Inte 3_21448771     | 9.31 | proximal promoter |
| AT2G31080 | na                                 | transposable elk 2_13230113  | 9.31 | intergenic        |
| AT1G67090 | RIBULOSE BISPHTOSPHATE CARBOXYL    | Encodes a merr 1_25048111    | 9.31 | downstream        |
| AT5G16560 | KANADI (KAN)                       | Encodes a KAN 5_5411565      | 9.3  | promoter          |
| AT5G20700 | na                                 | Protein of unknc 5_7007224   | 9.3  | promoter          |
| AT4G37610 | BTB AND TAZ DOMAIN PROTEIN 5 (bt5) | BTB and TAZ di 4_17672407    | 9.29 | promoter          |
| AT1G50290 | na                                 | unknown proteir 1_18627590   | 9.29 | three_prime_UTR   |
| AT5G64430 | na                                 | Octicosapeptide 5_25764261   | 9.29 | promoter          |
| AT4G37608 | na                                 | unknown proteir 4_17672407   | 9.29 | intergenic        |
| AT4G37620 | na                                 | transposable elk 4_17672407  | 9.29 | intergenic        |
| AT1G13110 | CYTOCHROME P450, FAMILY 71 SUBFA   | member of CYP 1_4466879      | 9.28 | promoter          |
| AT1G13100 | CYTOCHROME P450, FAMILY 71, SUBF   | putative cytochr 1_4466879   | 9.28 | intergenic        |
| AT2G15090 | 3-KETOACYL-COA SYNTHASE 8 (KCS8)   | Encodes KCS8, 2_6541701      | 9.27 | proximal promoter |
| AT5G23850 | na                                 | FUNCTIONS IN 5_8038493       | 9.27 | intron            |
| AT3G12150 | na                                 | unknown proteir 3_3879027    | 9.26 | promoter          |
| AT1G68620 | na                                 | alpha/beta-Hydr 1_25765809   | 9.25 | promoter          |
| AT5G48540 | na                                 | receptor-like prc 5_19670304 | 9.25 | promoter          |
| AT4G30350 | na                                 | Double Clip-N m 4_14852559   | 9.25 | intergenic        |
| AT3G18710 | PLANT U-BOX 29 (PUB29)             | Encodes a prote 3_6435820    | 9.25 | promoter          |
| AT1G17120 | CATIONIC AMINO ACID TRANSPORTER    | Encodes a merr 1_5851755     | 9.24 | promoter          |
| AT5G15350 | EARLY NODULIN-LIKE PROTEIN 17 (EN1 | early nodulin-lik 5_4984770  | 9.24 | downstream        |
| AT1G06590 | na                                 | unknown proteir 1_2025493    | 9.24 | proximal promoter |
| AT1G06610 | na                                 | pre-tRNA; tRNA 1_2025493     | 9.24 | downstream        |
| AT1G06620 | na                                 | encodes a prote 1_2025493    | 9.24 | promoter          |
| AT5G40460 | na                                 | unknown proteir 5_16200767   | 9.24 | proximal promoter |
| AT5G15340 | na                                 | Pentatricopeptic 5_4984770   | 9.24 | proximal promoter |
| AT5G41600 | VIRB2-INTERACTING PROTEIN 3 (BTI3) | VIRB2-interactir 5_16635959  | 9.24 | promoter          |
| AT1G17370 | OLIGOURIDYLATE BINDING PROTEIN 1   | oligouridylate bi 1_5955168  | 9.23 | promoter          |
| AT3G60530 | GATA TRANSCRIPTION FACTOR 4 (GAT1  | Encodes a merr 3_22371265    | 9.22 | proximal promoter |
| AT3G19130 | RNA-BINDING PROTEIN 47B (RBP47B)   | RNA-binding prn 3_6614072    | 9.22 | promoter          |
| AT2G42570 | TRICHOME BIREFRINGENCE-LIKE 39 (T  | Encodes a merr 2_17722707    | 9.22 | proximal promoter |
| AT5G65610 | na                                 | unknown proteir 5_26221544   | 9.21 | intergenic        |
| AT5G65615 | na                                 | pre-tRNA; tRNA 5_26221544    | 9.21 | downstream        |
| AT5G65620 | na                                 | Zincin-like meta 5_26221544  | 9.21 | promoter          |
| AT3G22370 | ALTERNATIVE OXIDASE 1A (AOX1A)     | Encodes AOX1; 3_7906598      | 9.2  | promoter          |
| AT1G10060 | BRANCHED-CHAIN AMINO ACID TRANS    | encodes a mito 1_3287506     | 9.2  | intergenic        |
| AT1G10070 | BRANCHED-CHAIN AMINO ACID TRANS    | Encodes a chl 1_3287506      | 9.2  | proximal promoter |
| AT4G39350 | CELLULOSE SYNTHASE A2 (CESA2)      | Encodes a cellu 4_18302623   | 9.2  | intergenic        |
| AT5G11890 | EMBRYO DEFECTIVE 3135 (EMB3135)    | FUNCTIONS IN 5_3831570       | 9.2  | promoter          |
| AT4G39360 | na                                 | unknown proteir 4_18302623   | 9.2  | promoter          |
| AT3G47960 | na                                 | Major facilitator 3_17704696 | 9.2  | intergenic        |
| AT1G76880 | na                                 | Duplicated hom 1_28862019    | 9.2  | intergenic        |
| AT5G11900 | na                                 | Translation initi 5_3831570  | 9.2  | proximal promoter |
| AT3G05840 | (ATSK12)                           | encodes a SHA 3_1739018      | 9.19 | proximal promoter |
| AT3G61640 | ARABINOGALACTAN PROTEIN 20 (AGP)   | arabinogalactan 3_22809935   | 9.19 | downstream        |
| AT3G57330 | AUTOINHIBITED CA2+-ATPASE 11 (ACA  | Lesion mimic ph 3_21215619   | 9.19 | intron            |
| AT4G09153 | LOW-MOLECULAR-WEIGHT CYSTEINE-     | Encodes a merr 4_5833611     | 9.19 | proximal promoter |
| AT3G05835 | na                                 | pre-tRNA; tRNA 3_1739018     | 9.19 | downstream        |
| AT3G05830 | na                                 | Encodes alpha- 3_1739018     | 9.19 | intergenic        |
| AT4G09150 | na                                 | T-complex prote 4_5833611    | 9.19 | three_prime_UTR   |
| AT5G13180 | NAC DOMAIN CONTAINING PROTEIN 83   | Encodes a NAC 5_4193807      | 9.19 | proximal promoter |
| AT5G41410 | BELL 1 (BEL1)                      | Homeodomain f 5_16576723     | 9.18 | intergenic        |
| AT5G56980 | na                                 | unknown proteir 5_23057900   | 9.18 | promoter          |
| AT3G61420 | na                                 | BSD domain (B' 3_22732308    | 9.18 | promoter          |
| AT3G61430 | PLASMA MEMBRANE INTRINSIC PROTE    | a member of the 3_22732308   | 9.18 | proximal promoter |
| AT5G46880 | HOMEODOMAIN-7 (HB-7)               | homeobox-7 (H 5_19035749     | 9.17 | downstream        |
| AT1G02850 | na                                 | Tetratricopeptid 1_575640    | 9.17 | intergenic        |

|           |                                                    |                   |            |            |                   |
|-----------|----------------------------------------------------|-------------------|------------|------------|-------------------|
| AT1G02660 | na                                                 | alpha/beta-Hydr   | 1_575640   | 9.17       | proximal promoter |
| AT1G02670 | na                                                 | P-loop containir  | 1_575640   | 9.17       | promoter          |
| AT3G03170 | na                                                 | unknown proteir   | 3_731677   | 9.17       | promoter          |
| AT3G03180 | na                                                 | Got1/Slt2-like v  | 3_731677   | 9.17       | proximal promoter |
| AT3G45730 | na                                                 | unknown proteir   | 3_16789837 | 9.17       | promoter          |
| AT3G45740 | na                                                 | hydrolase family  | 3_16789837 | 9.17       | proximal promoter |
| AT4G36970 | na                                                 | Remorin family    | 4_17433014 | 9.17       | proximal promoter |
| AT5G46890 | na                                                 | Bifunctional inhi | 5_19035749 | 9.17       | intergenic        |
| AT2G45660 | AGAMOUS-LIKE 20 (AGL20)                            | Controls floweri  | 2_18814456 | 9.16       | intergenic        |
| AT5G01520 | ABA INSENSITIVE RING PROTEIN 2 (AIR RING/U-box su) | 5_210493          | 9.15       | intergenic |                   |
| AT2G40810 | HOMOLOG OF YEAST AUTOPHAGY 18C homolog of yea      | 2_17032332        | 9.15       | promoter   |                   |
| AT5G01530 | LIGHT HARVESTING COMPLEX PHOTO                     | light harvesting  | 5_210493   | 9.15       | downstream        |
| AT2G04675 | na                                                 | unknown proteir   | 2_1637783  | 9.15       | exon              |
| AT5G01542 | na                                                 | Potential natura  | 5_210493   | 9.15       | proximal promoter |
| AT5G25810 | TINY (tny)                                         | encodes a mem     | 5_8993218  | 9.15       | intergenic        |
| AT1G67370 | ASYNAPTIC 1 (ASY1)                                 | meiotic asynapt   | 1_25238248 | 9.14       | intergenic        |
| AT1G10370 | EARLY-RESPONSIVE TO DEHYDRATIO                     | Encodes GSTU      | 1_3398828  | 9.14       | promoter          |
| AT4G02440 | EMPFINDLICHER IM DUNKELROTEN LIC                   | EID1 is an F-bo   | 4_1072378  | 9.14       | promoter          |
| AT1G67360 | na                                                 | Rubber elongati   | 1_25238248 | 9.14       | promoter          |
| AT1G67365 | na                                                 | Potential natura  | 1_25238248 | 9.14       | promoter          |
| AT1G20780 | SENESCENCE-ASSOCIATED E3 UBIQU                     | Encodes a prote   | 1_7216966  | 9.14       | promoter          |
| AT4G02430 | SERINE/ARGININE-RICH PROTEIN SPLI                  | Barta et al (2011 | 4_1072378  | 9.14       | downstream        |
| AT4G36930 | SPATULA (SPT)                                      | Encodes a trans   | 4_17410677 | 9.14       | intergenic        |
| AT3G04620 | D NUCLDUO1-ACTIVATEEIC ACID BINDI                  | Target promoter   | 3_1258087  | 9.13       | proximal promoter |
| AT2G02540 | HOMEBOX PROTEIN 21 (HB21)                          | Zinc finger hom   | 2_682521   | 9.13       | proximal promoter |
| AT3G62090 | PHYTOCHROME INTERACTING FACTOI                     | encodes a nove    | 3_22991246 | 9.13       | proximal promoter |
| AT3G04630 | WVD2-LIKE 1 (WDL1)                                 | Member of a srr   | 3_1258087  | 9.13       | promoter          |
| AT5G57590 | BIOTIN AUXOTROPH 1 (BIO1)                          | Mutant complen    | 5_23318302 | 9.12       | downstream        |
| AT1G28430 | CYTOCHROME P450, FAMILY 705, SUBF                  | member of CYP     | 1_9991984  | 9.12       | intergenic        |
| AT5G03080 | LIPID PHOSPHATE PHOSPHATASE GAN                    | Encodes a phos    | 5_721745   | 9.12       | promoter          |
| AT2G23770 | LYSM-CONTAINING RECEPTOR-LIKE KI                   | protein kinase f  | 2_10122255 | 9.12       | promoter          |
| AT2G19800 | MYO-INOSITOL OXYGENASE 2 (MIOX2)                   | Encodes a myo     | 2_8534860  | 9.12       | proximal promoter |
| AT1G68470 | na                                                 | Exostosin family  | 1_25677293 | 9.12       | intron            |
| AT4G23820 | na                                                 | Pectin lyase-like | 4_12399201 | 9.12       | intron            |
| AT4G30130 | na                                                 | Protein of unkn   | 4_14734175 | 9.12       | proximal promoter |
| AT5G57580 | na                                                 | Calmodulin-bin    | 5_23318302 | 9.12       | promoter          |
| AT4G01320 | (ATSTE24)                                          | CAAX protease     | 4_550305   | 9.1        | intergenic        |
| AT4G26210 | na                                                 | Mitochondrial A'  | 4_13279795 | 9.1        | proximal promoter |
| AT3G07580 | na                                                 | unknown proteir   | 3_2422888  | 9.1        | promoter          |
| AT4G01330 | na                                                 | Protein kinase s  | 4_550305   | 9.1        | promoter          |
| AT4G01328 | na                                                 | unknown proteir   | 4_550305   | 9.1        | exon              |
| AT2G26910 | ATP-BINDING CASSETTE G32 (ABCG32                   | Encodes a merr    | 2_11481440 | 9.09       | promoter          |
| AT1G30570 | HERCULES RECEPTOR KINASE 2 (HER                    | Encodes HERC      | 1_10827155 | 9.09       | proximal promoter |
| AT4G11820 | HYDROXYMETHYLGLUTARYL-COA SYN                      | Encodes a prote   | 4_7114050  | 9.09       | proximal promoter |
| AT5G19040 | ISOPENTENYLTRANSFERASE 5 (IPT5)                    | Encodes cytoKir   | 5_6362117  | 9.09       | three_prime_UTR   |
| AT1G20460 | na                                                 | unknown proteir   | 1_7090053  | 9.09       | proximal promoter |
| AT1G78080 | RELATED TO AP2 4 (RAP2.4)                          | Encodes a merr    | 1_29363018 | 9.09       | proximal promoter |
| AT2G16370 | THYMIDYLATE SYNTHASE 1 (THY-1)                     | Encodes a bifur   | 2_7084684  | 9.09       | promoter          |
| AT2G18290 | ANAPHASE PROMOTING COMPLEX 10                      | Encodes APC1(2_   | 7951385    | 9.08       | proximal promoter |
| AT1G69150 | na                                                 | Cysteine/Histidi  | 1_25997693 | 9.08       | proximal promoter |
| AT1G51400 | na                                                 | Photosystem II    | 1_19052717 | 9.08       | promoter          |
| AT1G51402 | na                                                 | unknown proteir   | 1_19052717 | 9.08       | intron            |
| AT2G36053 | na                                                 | unknown proteir   | 2_15140288 | 9.08       | intergenic        |
| AT1G51390 | NFU DOMAIN PROTEIN 5 (NFU5)                        | Encodes a prote   | 1_19052717 | 9.08       | intergenic        |
| AT5G03690 | FRUCTOSE-BISPHOSPHATE ALDOLASE                     | Aldolase superf.  | 5_966123   | 9.07       | proximal promoter |
| AT1G01610 | GLYCEROL-3-PHOSPHATE ACYLTRANS                     | Encodes a prote   | 1_223339   | 9.07       | intron            |
| AT5G44220 | na                                                 | F-box family prc  | 5_17809127 | 9.07       | proximal promoter |
| AT4G30780 | na                                                 | unknown proteir   | 4_14990190 | 9.07       | promoter          |
| AT1G01630 | na                                                 | Sec14p-like phc   | 1_223339   | 9.07       | intergenic        |
| AT5G03700 | na                                                 | D-mannose bin     | 5_966123   | 9.07       | exon              |
| AT1G01620 | PLASMA MEMBRANE INTRINSIC PROTE                    | a member of the   | 1_223339   | 9.07       | intergenic        |
| AT1G69120 | APETALA1 (AP1)                                     | Floral homeotic   | 1_25986450 | 9.06       | promoter          |
| AT3G49670 | BARELY ANY MERISTEM 2 (BAM2)                       | Encodes a CLA     | 3_18415781 | 9.06       | proximal promoter |
| AT5G10450 | G-BOX REGULATING FACTOR 6 (GRF6)                   | Encodes a merr    | 5_3286453  | 9.06       | promoter          |
| AT3G49660 | HUMAN WDR5 (WD40 REPEAT) HOMOL                     | Encodes a struc   | 3_18415781 | 9.06       | downstream        |
| AT4G05100 | MYB DOMAIN PROTEIN 74 (MYB74)                      | Member of the F   | 4_2620567  | 9.06       | intergenic        |
| AT4G10940 | na                                                 | RING/U-box prc    | 4_6711281  | 9.05       | promoter          |
| AT4G10950 | na                                                 | SGNH hydrolas     | 4_6711281  | 9.05       | downstream        |
| AT2G36050 | OVATE FAMILY PROTEIN 15 (OFP15)                    | ovate family pro  | 2_15136880 | 9.05       | promoter          |
| AT3G11410 | PROTEIN PHOSPHATASE 2CA (PP2CA)                    | Encodes proteir   | 3_3585966  | 9.05       | promoter          |
| AT4G39090 | RESPONSIVE TO DEHYDRATION 19 (RL                   | Similar to cystei | 4_18217571 | 9.05       | promoter          |
| AT4G39100 | SHORT LIFE (SHL)                                   | Putative transcr  | 4_18217571 | 9.05       | intergenic        |
| AT4G39080 | VACUOLAR PROTON ATPASE A3 (VHA-                    | Vacuolar proton   | 4_18217571 | 9.05       | intergenic        |
| AT5G64750 | ABA REPRESSOR 1 (ABR1)                             | Encodes a puta    | 5_25890755 | 9.04       | proximal promoter |
| AT1G67560 | LIPOXYGENASE 6 (LOX6)                              | PLAT/LH2 dom      | 1_25319784 | 9.04       | promoter          |
| AT4G29140 | ACTIVATED DISEASE SUSCEPTIBILITY                   | Encodes Activa    | 4_14373158 | 9.03       | intergenic        |
| AT4G01860 | na                                                 | Transducin fami   | 4_808381   | 9.03       | promoter          |
| AT4G01865 | na                                                 | pre-tRNA; tRNA    | 4_808381   | 9.03       | promoter          |
| AT4G01870 | na                                                 | tolB protein-rela | 4_808381   | 9.03       | three_prime_UTR   |
| AT4G01880 | na                                                 | methyltransfera   | 4_808381   | 9.03       | intergenic        |
| AT1G76170 | na                                                 | 2-thiocytidine tR | 1_28583591 | 9.03       | intergenic        |
| AT1G76160 | SKU5 SIMILAR 5 (sk5s)                              | SKU5 similar 5    | 1_28583591 | 9.03       | proximal promoter |
| AT3G57890 | na                                                 | Tubulin binding   | 3_21438040 | 9.02       | promoter          |
| AT5G62280 | na                                                 | Protein of unkn   | 5_25015532 | 9.02       | proximal promoter |
| AT5G62270 | na                                                 | FUNCTIONS IN      | 5_25015532 | 9.02       | intergenic        |
| AT5G60978 | na                                                 | Encodes a ECA     | 5_24540525 | 9.01       | proximal promoter |
| AT2G44610 | (RAB6A)                                            | Encodes a GTP     | 2_18410625 | 9          | intergenic        |
| AT1G08640 | CHLOROPLAST J-LIKE DOMAIN 1 (CJD1                  | Encodes a chol    | 1_2747009  | 9          | intergenic        |
| AT1G13380 | na                                                 | Protein of unkn   | 1_4590515  | 9          | promoter          |
| AT2G44600 | na                                                 | unknown proteir   | 2_18410625 | 9          | intergenic        |
| AT1G08630 | THREONINE ALDOLASE 1 (THA1)                        | Encodes a threk   | 1_2747009  | 9          | intron            |
| AT3G06080 | na                                                 | Encodes a merr    | 3_1838457  | 8.99       | promoter          |
| AT5G06530 | ATP-BINDING CASSETTE G22 (ABCG22                   | Encodes ABCG      | 5_1997597  | 8.97       | proximal promoter |
| AT3G51090 | na                                                 | Protein of unkn   | 3_18977283 | 8.97       | intergenic        |

|           |                                     |                              |      |                   |
|-----------|-------------------------------------|------------------------------|------|-------------------|
| AT2G42380 | (BZIP34)                            | Encodes a merr 2_17649191    | 8.96 | promoter          |
| AT1G08570 | ATYPICAL CYS HIS RICH THIOREDOXIN   | Encodes a merr 1_2712854     | 8.96 | promoter          |
| AT1G53520 | FATTY-ACID-BINDING PROTEIN 3 (FAP3) | Encodes a plast 1_19976157   | 8.96 | intergenic        |
| AT4G21200 | GIBBERELLIN 2-OXIDASE 8 (GA2OX8)    | Encodes a prote 4_11304736   | 8.96 | intron            |
| AT1G53510 | MITOGEN-ACTIVATED PROTEIN KINASE    | member of MAF 1_19976157     | 8.96 | proximal promoter |
| AT1G53200 | na                                  | unknown protei 1_19848600    | 8.96 | intergenic        |
| AT1G53210 | na                                  | sodium/calcium 1_19848600    | 8.96 | intergenic        |
| AT1G53220 | na                                  | pre-tRNA; tRNA 1_19848600    | 8.96 | intergenic        |
| AT1G53230 | TEOSINTE BRANCHED 1, CYCLOIDEA A    | Encodes a merr 1_19848600    | 8.96 | intergenic        |
| AT2G03340 | WRKY DNA-BINDING PROTEIN 3 (WRKY)   | Encodes WRKY 2_1018489       | 8.96 | proximal promoter |
| AT1G27130 | GLUTATHIONE S-TRANSFERASE TAU 1     | Encodes glutat 1_9425382     | 8.95 | promoter          |
| AT2G03070 | MEDIATOR SUBUNIT 8 (MED8)           | Encodes a subu 2_908996      | 8.95 | three_prime_UTR   |
| AT1G66725 | MICRORNA163 (MIR163)                | Encodes a micr 1_24883696    | 8.95 | promoter          |
| AT2G03080 | na                                  | transposable elk 2_908996    | 8.95 | proximal promoter |
| AT5G57410 | na                                  | Afadin/alpha-ac 5_23267961   | 8.95 | promoter          |
| AT1G75640 | na                                  | Leucine-rich rec 1_28402567  | 8.95 | intergenic        |
| AT5G62960 | na                                  | unknown protei 5_25267523    | 8.95 | proximal promoter |
| AT3G17185 | TRANS-ACTING SIRNA3 (TAS3)          | Encodes a trans 3_5861330    | 8.95 | promoter          |
| AT1G75630 | VACUOLAR H+-PUMPING ATPASE 16 KI    | vacuolar H+-pui 1_28402567   | 8.95 | downstream        |
| AT3G05830 | na                                  | Encodes alpha- 3_1735964     | 8.94 | proximal promoter |
| AT3G12610 | DNA-DAMAGE REPAIR/TOLERATION 10     | Plays role in DN 3_4008398   | 8.93 | proximal promoter |
| AT1G21975 | na                                  | unknown protei 1_7732386     | 8.93 | exon              |
| AT2G19650 | na                                  | Cysteine/Histidi 2_8495965   | 8.93 | promoter          |
| AT3G12600 | NUDIX HYDROLASE HOMOLOG 16 (NUI     | nudix hydrolase 3_4008398    | 8.93 | intergenic        |
| AT3G50240 | (KICP-02)                           | Encodes a kine: 3_18629351   | 8.92 | promoter          |
| AT4G23260 | CYSTEINE-RICH RLK (RECEPTOR-LIKE    | Encodes a cystr 4_12170364   | 8.92 | promoter          |
| AT4G23270 | CYSTEINE-RICH RLK (RECEPTOR-LIKE    | Encodes a cystr 4_12170364   | 8.92 | proximal promoter |
| AT5G04560 | DEMETER (DME)                       | Encodes a DNA 5_1319062      | 8.92 | intergenic        |
| AT1G07670 | ENDOMEMBRANE-TYPE CA-ATPASE 4       | endomembrane 1_2374826       | 8.92 | promoter          |
| AT2G23000 | SERINE CARBOXYPEPTIDASE-LIKE 10     | (serine carboxyp 2_9792128   | 8.92 | promoter          |
| AT2G13790 | SOMATIC EMBRYOGENESIS RECEPTO       | somatic embryo 2_5741813     | 8.92 | promoter          |
| AT5G04590 | SULFITE REDUCTASE (SIR)             | A.thaliana gene 5_1319062    | 8.92 | promoter          |
| AT3G58120 | (BZIP61)                            | Encodes a merr 3_21523512    | 8.91 | promoter          |
| AT1G12570 | na                                  | Glucose-methar 1_4282396     | 8.91 | proximal promoter |
| AT1G12580 | PHOSPHOENOLPYRUVATE CARBOXYL        | phosphoenolpyr 1_4282396     | 8.91 | proximal promoter |
| AT3G54420 | HOMOLOG OF CARROT EP3-3 CHITINA     | encodes an EP: 3_20148125    | 8.9  | intergenic        |
| AT3G54440 | na                                  | glycoside hydro 3_20148125   | 8.9  | downstream        |
| AT4G19420 | na                                  | Pectinacetylest 4_10591186   | 8.9  | proximal promoter |
| AT3G54430 | SHI-RELATED SEQUENCE 6 (SRS6)       | A member of Sh 3_20148125    | 8.9  | five_prime_UTR    |
| AT2G24270 | ALDEHYDE DEHYDROGENASE 11A3 (A      | Encodes a prote 2_10329931   | 8.89 | five_prime_UTR    |
| AT5G49360 | BETA-XYLOSIDASE 1 (BXL1)            | Encodes a bifur 5_20016751   | 8.89 | promoter          |
| AT4G34390 | EXTRA-LARGE GTP-BINDING PROTEIN     | extra-large GTF 4_16441053   | 8.89 | promoter          |
| AT2G29120 | GLUTAMATE RECEPTOR 2.7 (GLR2.7)     | member of Puta 2_12518221    | 8.89 | proximal promoter |
| AT4G34380 | na                                  | Transducin/WD 4_16441053     | 8.89 | intergenic        |
| AT5G49350 | na                                  | Glycine-rich pro 5_20016751  | 8.89 | intergenic        |
| AT3G22190 | IQ-DOMAIN 5 (IQD5)                  | IQ-domain 5 (IQ 3_7834062    | 8.88 | promoter          |
| AT1G70944 | na                                  | unknown protei 1_26750435    | 8.88 | proximal promoter |
| AT1G15360 | SHINE 1 (SHN1)                      | Encodes a merr 1_5281970     | 8.88 | proximal promoter |
| AT5G64310 | ARABINOGALACTAN PROTEIN 1 (AGP1     | Encodes arabin 5_25721734    | 8.87 | promoter          |
| AT1G42990 | BASIC REGION/LEUCINE ZIPPER MOTIF   | bZIP60 consists 1_16137760   | 8.87 | promoter          |
| AT2G46080 | BYPASS 2 (BPS2)                     | Encodes a prote 2_18950649   | 8.87 | proximal promoter |
| AT2G46090 | LONG-CHAIN BASE (LCB) KINASE 2 (LC  | Encodes a puta 2_18950649    | 8.87 | promoter          |
| AT5G64320 | na                                  | Pentatricopeptic 5_25721734  | 8.87 | intergenic        |
| AT2G19460 | na                                  | Protein of unkn 2_8429882    | 8.87 | proximal promoter |
| AT5G26731 | na                                  | unknown protei 5_9296179     | 8.87 | three_prime_UTR   |
| AT3G44310 | NITRILASE 1 (NIT1)                  | Mutants are res 3_15986699   | 8.87 | promoter          |
| AT1G28230 | PURINE PERMEASE 1 (PUP1)            | Encodes a trans 1_9868044    | 8.87 | intergenic        |
| AT2G19450 | TRIACYLGLYCEROL BIOSYNTHESIS DE     | Encodes Acyl-C 2_8429882     | 8.87 | downstream        |
| AT5G41790 | COP1-INTERACTIVE PROTEIN 1 (CIP1)   | encodes a prote 5_16725737   | 8.86 | proximal promoter |
| AT1G32780 | na                                  | GroES-like zinc 1_11873018   | 8.86 | promoter          |
| AT3G52700 | na                                  | unknown protei 3_19535570    | 8.86 | three_prime_UTR   |
| AT3G52710 | na                                  | unknown protei 3_19535570    | 8.86 | three_prime_UTR   |
| AT4G20250 | na                                  | unknown protei 4_10940446    | 8.85 | exon              |
| AT4G20260 | PLASMA-MEMBRANE ASSOCIATED CA       | Encodes a Ca2: 4_10940446    | 8.85 | promoter          |
| AT2G47240 | LONG-CHAIN ACYL-COA SYNTHASE 1      | ( Encodes an acy 2_19390703  | 8.84 | proximal promoter |
| AT5G55620 | na                                  | unknown protei 5_22528755    | 8.84 | proximal promoter |
| AT5G02530 | na                                  | RNA-binding (R 5_566045      | 8.84 | promoter          |
| AT5G60966 | na                                  | pre-tRNA; tRNA 5_24533169    | 8.84 | intergenic        |
| AT1G25450 | 3-KETOACYL-COA SYNTHASE 5 (KCS5)    | Encodes KCS5, 1_8940539      | 8.83 | promoter          |
| AT1G20693 | HIGH MOBILITY GROUP B2 (HMGB2)      | Encodes a prote 1_7176624    | 8.83 | promoter          |
| AT4G01530 | na                                  | transposable elk 4_663218    | 8.83 | promoter          |
| AT1G20691 | na                                  | Potential natura 1_7176624   | 8.83 | promoter          |
| AT1G72050 | TRANSCRIPTION FACTOR IIIA (TFIIIA)  | Encodes a trans 1_27114761   | 8.83 | promoter          |
| AT1G55250 | HISTONE MONO-UBIQUITINATION 2 (HU   | Encodes one of 1_20612564    | 8.82 | downstream        |
| AT1G28300 | LEAFY COTYLEDON 2 (LEC2)            | Transcription fa 1_9897675   | 8.82 | intron            |
| AT1G20070 | na                                  | unknown protei 1_6959475     | 8.82 | promoter          |
| AT5G46910 | na                                  | Transcription fa 5_19045611  | 8.82 | proximal promoter |
| AT1G55260 | na                                  | Bifunctional inhi 1_20612564 | 8.82 | proximal promoter |
| AT5G65380 | na                                  | MATE efflux fan 5_26124562   | 8.82 | intron            |
| AT5G18650 | na                                  | CHY-type/CTCt 5_6217827      | 8.8  | promoter          |
| AT2G24100 | ALTERED SEED GERMINATION 1 (ASG1    | unknown protei 2_10244747    | 8.79 | promoter          |
| AT1G09350 | GALACTINOL SYNTHASE 3 (GalS3)       | Predicted to enc 1_3019590   | 8.79 | promoter          |
| AT3G58790 | GALACTURONOSYLTRANSFERASE 15        | Encodes a prote 3_21746559   | 8.79 | promoter          |
| AT1G23070 | na                                  | Protein of unkn 1_8175938    | 8.79 | promoter          |
| AT2G31981 | na                                  | unknown protei 2_13610027    | 8.79 | exon              |
| AT2G22426 | na                                  | unknown protei 2_9517529     | 8.79 | intergenic        |
| AT1G57980 | na                                  | Nucleotide-suq 1_21443580    | 8.79 | proximal promoter |
| AT3G58795 | na                                  | Potential natura 3_21746559  | 8.79 | downstream        |
| AT2G31980 | PHYTOCYSTATIN 2 (CYS2)              | PHYTOCYSTATI 2_13610027      | 8.79 | promoter          |
| AT1G57990 | PURINE PERMEASE 18 (PUP18)          | Member of a far 1_21443580   | 8.79 | proximal promoter |
| AT1G75440 | UBIQUITIN-CONJUGATING ENZYME 16     | ubiquitin-conju 1_28313467   | 8.79 | promoter          |
| AT2G42350 | na                                  | RING/U-box suq 2_17640165    | 8.78 | downstream        |
| AT5G53450 | OBP3-RESPONSIVE GENE 1 (ORG1)       | OBP3-responsi 5_21688486     | 8.78 | promoter          |
| AT1G24170 | (LGT9)                              | Encodes a prote 1_8556654    | 8.77 | intergenic        |

|           |                                    |                              |      |                   |
|-----------|------------------------------------|------------------------------|------|-------------------|
| AT1G29170 | (WAVE2)                            | Encodes a merr 1_10195418    | 8.77 | proximal promoter |
| AT1G24160 | na                                 | unknown proteir 1_8556654    | 8.77 | promoter          |
| AT3G47610 | na                                 | transcription reę 3_17553071 | 8.77 | intergenic        |
| AT1G25275 | na                                 | unknown proteir 1_8860659    | 8.76 | promoter          |
| AT1G77746 | na                                 | unknown proteir 1_29229644   | 8.76 | intergenic        |
| AT1G77750 | na                                 | Ribosomal prote 1_29229644   | 8.76 | intergenic        |
| AT3G06500 | ALKALINE/NEUTRAL INVERTASE C (A/N  | Plant neutral inv 3_2015850  | 8.75 | downstream        |
| AT3G12120 | FATTY ACID DESATURASE 2 (FAD2)     | Major enzyme n 3_3863050     | 8.75 | promoter          |
| AT1G27320 | HISTIDINE KINASE 3 (HK3)           | Encodes a histi 1_9492769    | 8.75 | downstream        |
| AT1G27330 | na                                 | Ribosome asso 1_9492769      | 8.75 | promoter          |
| AT3G12130 | na                                 | KH domain-con 3_3863050      | 8.75 | intergenic        |
| AT3G06510 | SENSITIVE TO FREEZING 2 (SFR2)     | Encodes a prote 3_2015850    | 8.75 | promoter          |
| AT2G41290 | STRICTOSIDINE SYNTHASE-LIKE 2 (SSI | Although this er 2_17211534  | 8.75 | exon              |
| AT3G19150 | KIP-RELATED PROTEIN 6 (KRP6)       | Kip-related prot 3_6617867   | 8.74 | promoter          |
| AT1G06370 | na                                 | pseudogene, sii 1_1940582    | 8.73 | intergenic        |
| AT1G06360 | na                                 | Fatty acid desat 1_1940582   | 8.73 | promoter          |
| AT3G18050 | na                                 | unknown proteir 3_6182965    | 8.73 | downstream        |
| AT4G11300 | na                                 | CONTAINS Inte 4_6877760      | 8.73 | intergenic        |
| AT4G12230 | na                                 | alpha/beta-Hydr 4_7284456    | 8.73 | promoter          |
| AT2G36640 | EMBRYONIC CELL PROTEIN 63 (ECP63   | Encodes putativ 2_15357173   | 8.72 | exon              |
| AT2G36632 | na                                 | unknown proteir 2_15357173   | 8.72 | intergenic        |
| AT2G46580 | na                                 | Pyridoxamine 5' 2_19131113   | 8.72 | proximal promoter |
| AT2G39260 | na                                 | binding;RNA bir 2_16391621   | 8.72 | intergenic        |
| AT3G57020 | na                                 | Calcium-depent 3_21100525    | 8.72 | promoter          |
| AT1G01030 | NGATHA3 (NGA3)                     | NGATHA3 (NG_1_13731          | 8.72 | promoter          |
| AT2G39250 | SCHNARCHZAPPEN (SNZ)               | Encodes a AP2 2_16391621     | 8.72 | proximal promoter |
| AT4G15550 | INDOLE-3-ACETATE BETA-D-GLUCOSY    | UDP-glucose:in 4_8879667     | 8.71 | promoter          |
| AT3G09975 | na                                 | unknown proteir 3_3068854    | 8.71 | intergenic        |
| AT3G09980 | na                                 | Family of unkno 3_3068854    | 8.71 | promoter          |
| AT2G39705 | ROTUNDIFOLIA LIKE 8 (RTFL8)        | ROTUNDIFOLI 2_16553611       | 8.71 | intergenic        |
| AT4G39260 | COLD, CIRCADIAN RHYTHM, AND RNA    | Encodes a glyci 4_18275189   | 8.7  | promoter          |
| AT2G35840 | na                                 | Sucrose-6F-phc 2_15057192    | 8.7  | intron            |
| AT2G35850 | na                                 | unknown proteir 2_15057192   | 8.7  | downstream        |
| AT2G40008 | na                                 | Potential natura 2_16707354  | 8.7  | proximal promoter |
| AT3G28193 | na                                 | unknown proteir 3_10515273   | 8.7  | proximal promoter |
| AT1G31930 | EXTRA-LARGE GTP-BINDING PROTEIN    | Encodes XLG3 1_11464974      | 8.69 | promoter          |
| AT5G11790 | N-MYC DOWNREGULATED-LIKE 2 (NDL    | N-MYC downreę 5_3798846      | 8.69 | proximal promoter |
| AT1G31920 | na                                 | Tetratricopeptid 1_11464974  | 8.69 | proximal promoter |
| AT3G61380 | TON1 RECRUITING MOTIF 14 (TRM14)   | Phosphatidyli 3_22712232     | 8.69 | proximal promoter |
| AT1G78100 | AUXIN UP-REGULATED F-BOX PROTEIN   | F-box family prc 1_29387791  | 8.68 | promoter          |
| AT1G25425 | CLAVATA3/ESR-RELATED 43 (CLE43)    | CLAVATA3/ESF 1_8922288       | 8.68 | promoter          |
| AT2G38110 | GLYCEROL-3-PHOSPHATE ACYLTRANS     | Encodes a prote 2_15962019   | 8.68 | intergenic        |
| AT2G36950 | na                                 | Heavy metal tra 2_15516678   | 8.68 | exon              |
| AT5G18550 | na                                 | Zinc finger C-x8 5_6157539   | 8.68 | proximal promoter |
| AT1G10657 | na                                 | Plant protein 15 1_3530415   | 8.68 | promoter          |
| AT5G20700 | na                                 | Protein of unknt 5_7008440   | 8.68 | proximal promoter |
| AT2G25490 | EIN3-BINDING F BOX PROTEIN 1 (EBF1 | Encodes an F-b 2_10847225    | 8.67 | downstream        |
| AT5G51550 | EXORDIUM LIKE 3 (EXL3)             | EXORDIUM like 5_20941461     | 8.67 | proximal promoter |
| AT5G51545 | LOW PSII ACCUMULATION2 (LPA2)      | Encodes LPA2 5_20941461      | 8.67 | intergenic        |
| AT1G25460 | na                                 | NAD(P)-binding 1_8941500     | 8.67 | proximal promoter |
| AT2G25482 | na                                 | Encodes a ECA 2_10847225     | 8.67 | proximal promoter |
| AT2G45120 | na                                 | C2H2-like zinc f 2_18602444  | 8.67 | proximal promoter |
| AT2G38120 | AUXIN RESISTANT 1 (AUX1)           | Encodes an aux 2_15977446    | 8.66 | intergenic        |
| AT5G07860 | na                                 | HXXXD-type ac 5_2511080      | 8.66 | promoter          |
| AT1G60160 | na                                 | Potassium trans 1_22191510   | 8.66 | promoter          |
| AT2G03980 | na                                 | GDSL-like Lipas 2_1259616    | 8.66 | intron            |
| AT4G29330 | DERLIN-1 (DER1)                    | DERLIN-1 (DEF 4_14443080     | 8.65 | proximal promoter |
| AT4G25640 | DETOXIFYING EFFLUX CARRIER 35 (DT  | Encodes a multi 4_13079653   | 8.65 | proximal promoter |
| AT3G03150 | na                                 | unknown proteir 3_729685     | 8.64 | promoter          |
| AT3G03160 | na                                 | FUNCTIONS IN 3_729685        | 8.64 | promoter          |
| AT3G03140 | na                                 | Tudor/PWWP/n 3_729685        | 8.64 | intergenic        |
| AT1G03990 | na                                 | Long-chain fatty 1_1028474   | 8.64 | intergenic        |
| AT1G19840 | na                                 | SAUR-like auxir 1_6868137    | 8.64 | intergenic        |
| AT1G04000 | na                                 | unknown proteir 1_1028474    | 8.64 | exon              |
| AT5G50335 | na                                 | unknown proteir 5_20490826   | 8.64 | proximal promoter |
| AT2G30420 | ENHANCER OF TRY AND CPC 2 (ETC2)   | In a tandem rep 2_12962268   | 8.63 | promoter          |
| AT3G61755 | na                                 | pre-tRNA; tRNA 3_22859634    | 8.63 | promoter          |
| AT5G45745 | na                                 | pre-tRNA; tRNA 5_18558995    | 8.63 | downstream        |
| AT5G65166 | na                                 | This gene encod 5_26036284   | 8.63 | downstream        |
| AT5G45750 | RAB GTPASE HOMOLOG A1C (RABA1c)    | RAB GTPase hi 5_18558995     | 8.63 | promoter          |
| AT2G30424 | TRICHOMELESS 2 (TCL2)              | In a tandem rep 2_12962268   | 8.63 | intergenic        |
| AT4G37780 | MYB DOMAIN PROTEIN 87 (MYB87)      | encoded by the 4_17761835    | 8.62 | proximal promoter |
| AT1G32928 | na                                 | unknown proteir 1_11931086   | 8.62 | promoter          |
| AT1G32930 | na                                 | Galactosyltrans 1_11931086   | 8.62 | intergenic        |
| AT2G03810 | na                                 | 18S pre-riboson 2_1161454    | 8.62 | intron            |
| AT3G51660 | na                                 | Tautomerase/M 3_19166295     | 8.62 | proximal promoter |
| AT1G35460 | FLOWERING BHLH 1 (FBH1)            | basic helix-loop 1_13039843  | 8.61 | promoter          |
| AT1G41830 | SKU5-SIMILAR 6 (SKS6)              | SKU5-similar 6 1_15606681    | 8.61 | intron            |
| AT2G32800 | (AP4.3A)                           | AP4.3A; FUNC: 2_13916288     | 8.6  | promoter          |
| AT2G23130 | ARABINO GALACTAN PROTEIN 17 (AGP   | AGP17 is a lysir 2_9842001   | 8.6  | proximal promoter |
| AT3G01500 | CARBONIC ANHYDRASE 1 (CA1)         | Encodes a puta 3_197042      | 8.6  | intron            |
| AT1G25425 | CLAVATA3/ESR-RELATED 43 (CLE43)    | CLAVATA3/ESF 1_8926691       | 8.6  | intergenic        |
| AT5G14400 | CYTOCHROME P450, FAMILY 724, SUBF  | Encodes a bras 5_4647552     | 8.6  | intergenic        |
| AT3G13682 | LSD1-LIKE2 (LSDL2)                 | Encodes a hom 3_4481999      | 8.6  | promoter          |
| AT2G23118 | na                                 | unknown proteir 2_9842001    | 8.6  | exon              |
| AT2G23120 | na                                 | Late embryoęer 2_9842001     | 8.6  | promoter          |
| AT5G01720 | na                                 | RNI-like superfe 5_270670    | 8.6  | promoter          |
| AT5G14410 | na                                 | unknown proteir 5_4647552    | 8.6  | promoter          |
| AT5G14420 | RING DOMAIN LIGASE2 (RGLG2)        | Encodes RGLG 5_4647552       | 8.6  | intergenic        |
| AT3G10260 | na                                 | Reticulon family 3_3173026   | 8.59 | promoter          |
| AT5G18590 | na                                 | Galactose oxide 5_6182710    | 8.59 | five_prime_UTR    |
| AT5G19220 | ADP GLUCOSE PYROPHOSPHORYLASI      | Encodes the lar 5_6467497    | 8.58 | proximal promoter |
| AT3G26980 | MEMBRANE-ANCHORED UBIQUITIN-FO     | membrane-anc 3_9945813       | 8.58 | intergenic        |
| AT3G12470 | na                                 | Polynucleotidyl 3_3957653    | 8.58 | proximal promoter |

|           |                                     |                              |      |                   |
|-----------|-------------------------------------|------------------------------|------|-------------------|
| AT2G31005 | na                                  | Encodes a Cyst 2_13194184    | 8.58 | intergenic        |
| AT2G31010 | na                                  | Protein kinase s 2_13194184  | 8.58 | promoter          |
| AT3G26960 | na                                  | Pollen Ole e 1 a 3_9945813   | 8.58 | promoter          |
| AT5G19230 | na                                  | Glycoprotein me 5_6467497    | 8.58 | promoter          |
| AT3G12480 | NUCLEAR FACTOR Y, SUBUNIT C11 (NF   | nuclear factor Y 3_3957653   | 8.58 | promoter          |
| AT4G36930 | SPATULA (SPT)                       | Encodes a trans 4_17414019   | 8.57 | promoter          |
| AT4G27260 | (WES1)                              | encodes an IAA 4_13652501    | 8.56 | proximal promoter |
| AT1G54210 | AUTOPHAGY 12 A (ATG12A)             | AUTOPHAGY 1 1_20239738       | 8.56 | proximal promoter |
| AT1G33610 | na                                  | Leucine-rich re 1_12188869   | 8.56 | promoter          |
| AT4G27720 | na                                  | Major facilitator 4_13830950 | 8.56 | promoter          |
| AT2G27900 | na                                  | CONTAINS Inte 2_11886089     | 8.55 | downstream        |
| AT4G32350 | na                                  | Regulator of Vp 4_15617290   | 8.55 | promoter          |
| AT2G27920 | SERINE CARBOXYPEPTIDASE-LIKE 51     | (serine carboxyp 2_11886089  | 8.55 | intron            |
| AT1G01060 | LATE ELONGATED HYPOCOTYL (LHY)      | LHY encodes a 1_38083        | 8.54 | promoter          |
| AT1G11735 | MICRORNA171B (MIR171B)              | Encodes a micr 1_3962287     | 8.54 | proximal promoter |
| AT2G04050 | na                                  | MATE efflux fan 2_1339789    | 8.54 | proximal promoter |
| AT5G03310 | na                                  | SAUR-like auxir 5_801163     | 8.54 | proximal promoter |
| AT5G03320 | na                                  | Protein kinase s 5_801163    | 8.54 | proximal promoter |
| AT4G29520 | na                                  | LOCATED IN: e 4_14495940     | 8.54 | promoter          |
| AT4G29530 | na                                  | Pyridoxal phosph 4_14495940  | 8.54 | promoter          |
| AT4G30390 | na                                  | unknown proteir 4_14863194   | 8.54 | promoter          |
| AT1G09390 | na                                  | GDSL-like Lipas 1_3031079    | 8.53 | promoter          |
| AT4G36980 | na                                  | FUNCTIONS IN 4_17437307      | 8.53 | promoter          |
| AT5G53290 | CYTOKININ RESPONSE FACTOR 3 (CRF    | encodes a mem 5_21619565     | 8.52 | promoter          |
| AT1G36050 | na                                  | Endoplasmic rei 1_13453288   | 8.52 | intron            |
| AT1G36060 | na                                  | encodes a mem 1_13453288     | 8.52 | intergenic        |
| AT2G28550 | RELATED TO AP2.7 (RAP2.7)           | related to AP2.7 2_12224346  | 8.52 | intergenic        |
| AT2G24330 | na                                  | Protein of unknc 2_10350382  | 8.51 | proximal promoter |
| AT3G62400 | na                                  | unknown proteir 3_23089439   | 8.51 | promoter          |
| AT2G22880 | na                                  | VQ motif-contai 2_9741602    | 8.51 | promoter          |
| AT2G22890 | na                                  | Kua-ubiquitin cc 2_9741602   | 8.51 | intergenic        |
| AT3G52450 | PLANT U-BOX 22 (PUB22)              | Encodes a cyto 3_19439098    | 8.51 | intergenic        |
| AT3G62390 | TRICHOME BIREFRINGENCE-LIKE 6 (TE   | Encodes a merr 3_23089439    | 8.51 | promoter          |
| AT5G65890 | ACT DOMAIN REPEAT 1 (ACR1)          | Member of ACT 5_26356181     | 8.5  | intron            |
| AT3G04930 | na                                  | DNA-binding stc 3_1362812    | 8.5  | promoter          |
| AT3G04920 | na                                  | Ribosomal prote 3_1362812    | 8.5  | intergenic        |
| AT1G25520 | na                                  | Uncharacterizer 1_8961977    | 8.5  | promoter          |
| AT1G25510 | na                                  | Eukaryotic aspa 1_8961977    | 8.5  | proximal promoter |
| AT3G19550 | na                                  | unknown proteir 3_6785860    | 8.5  | intergenic        |
| AT2G21500 | na                                  | RING/U-box suj 2_9210399     | 8.49 | promoter          |
| AT2G21510 | na                                  | DNAJ heat shor 2_9210399     | 8.49 | intergenic        |
| AT1G70370 | POLYGALACTURONASE 2 (PG2)           | polygalacturona 1_26513158   | 8.49 | exon              |
| AT1G68690 | PROLINE-RICH EXTENSIN-LIKE RECEPTOR | Encodes a merr 1_25787305    | 8.49 | proximal promoter |
| AT2G17550 | TON1 RECRUITING MOTIF 26 (TRM26)    | unknown proteir 2_7637716    | 8.49 | five_prime_UTR    |
| AT4G37390 | (BRU6)                              | Encodes an IAA 4_17579492    | 8.48 | promoter          |
| AT3G63010 | GA INSENSITIVE DWARF1B (GID1B)      | Encodes a gibb 3_23287617    | 8.48 | proximal promoter |
| AT4G16780 | HOMEODOMAIN PROTEIN 2 (HB-2)        | Encodes a hom 4_9446082      | 8.48 | intergenic        |
| AT5G55840 | na                                  | Pentatricopeptic 5_22597807  | 8.48 | promoter          |
| AT3G63006 | na                                  | pre-tRNA; tRNA 3_23287617    | 8.48 | proximal promoter |
| AT3G51400 | na                                  | Arabidopsis pro 3_19079541   | 8.48 | proximal promoter |
| AT2G18300 | na                                  | basic helix-loop 2_7955222   | 8.48 | promoter          |
| AT2G18310 | na                                  | pre-tRNA; tRNA 2_7955222     | 8.48 | intergenic        |
| AT2G25470 | RECEPTOR LIKE PROTEIN 21 (RLP21)    | receptor like prc 2_10838181 | 8.48 | promoter          |
| AT2G47500 | na                                  | P-loop nucleosid 2_19491325  | 8.47 | proximal promoter |
| AT5G58900 | na                                  | Homeodomain-l 5_23786687     | 8.47 | proximal promoter |
| AT4G29240 | na                                  | Leucine-rich re 4_14418165   | 8.47 | promoter          |
| AT5G41060 | na                                  | DHHC-type zinc 5_16434438    | 8.47 | proximal promoter |
| AT5G41050 | na                                  | Pollen Ole e 1 a 5_16434438  | 8.47 | promoter          |
| AT5G18240 | MYB-RELATED PROTEIN 1 (MYR1)        | Encodes MYR1 5_6028153       | 8.46 | downstream        |
| AT3G15578 | na                                  | unknown proteir 3_5272991    | 8.46 | proximal promoter |
| AT1G54730 | na                                  | Major facilitator 1_20431679 | 8.46 | intergenic        |
| AT1G54740 | na                                  | Protein of unknc 1_20431679  | 8.46 | exon              |
| AT1G54750 | na                                  | transposable elk 1_20431679  | 8.46 | proximal promoter |
| AT5G18245 | na                                  | Potential natura 5_6028153   | 8.46 | promoter          |
| AT2G42620 | MORE AXILLARY BRANCHES 2 (MAX2)     | The mutations a 2_17755119   | 8.45 | proximal promoter |
| AT1G28580 | na                                  | GDSL-like Lipas 1_10046530   | 8.45 | promoter          |
| AT5G40890 | CHLORIDE CHANNEL A (CLC-A)          | Encodes a merr 5_16386880    | 8.44 | proximal promoter |
| AT3G06780 | na                                  | glycine-rich prot 3_2143403  | 8.44 | promoter          |
| AT3G19274 | na                                  | unknown proteir 3_6678741    | 8.44 | exon              |
| AT4G24050 | na                                  | NAD(P)-binding 4_12501737    | 8.44 | intergenic        |
| AT4G24060 | na                                  | Dof-type zinc fir 4_12501737 | 8.44 | proximal promoter |
| AT1G33250 | na                                  | Protein of unknc 1_12059623  | 8.44 | promoter          |
| AT3G47430 | PEROXIN 11B (PEX11B)                | member of the r 3_17478755   | 8.44 | proximal promoter |
| AT1G68440 | na                                  | unknown proteir 1_25657879   | 8.43 | promoter          |
| AT4G00170 | na                                  | Plant VAMP (ve 4_72298       | 8.43 | promoter          |
| AT1G04530 | TETRATRICOPEPTIDE REPEAT 4 (TPR4    | Encodes one of 1_1236515     | 8.43 | promoter          |
| AT4G00180 | YABBY3 (YAB3)                       | YABBY gene fai 4_72298       | 8.43 | intergenic        |
| AT5G11970 | na                                  | Protein of unknc 5_3864606   | 8.42 | proximal promoter |
| AT5G09975 | na                                  | pre-tRNA; tRNA 5_3118259     | 8.42 | promoter          |
| AT2G39360 | na                                  | Protein kinase s 2_16440230  | 8.42 | promoter          |
| AT5G14920 | na                                  | Gibberellin-requ 5_4825469   | 8.42 | proximal promoter |
| AT5G14910 | na                                  | Heavy metal tra 5_4825469    | 8.42 | downstream        |
| AT4G38770 | PROLINE-RICH PROTEIN 4 (PRP4)       | Encodes one of 4_18100878    | 8.42 | proximal promoter |
| AT5G54290 | (CcdA)                              | Encodes CcdA, 5_22054558     | 8.41 | intergenic        |
| AT5G54300 | na                                  | Protein of unknc 5_22054558  | 8.41 | exon              |
| AT3G10415 | na                                  | pre-tRNA; tRNA 3_3238288     | 8.41 | downstream        |
| AT3G10410 | SERINE CARBOXYPEPTIDASE-LIKE 49 (   | SERINE CARBO 3_3238288       | 8.41 | promoter          |
| AT1G53300 | TETRATRICOPEPTIDE-REPEAT THIORE     | Encodes one of 1_19883806    | 8.41 | intergenic        |
| AT3G14850 | TRICHOME BIREFRINGENCE-LIKE 41 (T   | Encodes a merr 3_4996410     | 8.41 | intron            |
| AT1G10240 | FAR1-RELATED SEQUENCE 11 (FRS11)    | FAR1-related sr 1_3356530    | 8.4  | downstream        |
| AT2G15580 | na                                  | RING/U-box suj 2_6798351     | 8.4  | intron            |
| AT1G68500 | na                                  | unknown proteir 1_25699757   | 8.4  | proximal promoter |
| AT2G27060 | na                                  | Leucine-rich re 2_11550968   | 8.4  | promoter          |
| AT1G10230 | SKP1-LIKE 18 (SK18)                 | SKP1-like 18 (S 1_3356530    | 8.4  | downstream        |

|           |                                    |                                         |      |                   |
|-----------|------------------------------------|-----------------------------------------|------|-------------------|
| AT3G12630 | STRESS ASSOCIATED PROTEIN 5 (SAP   | Encodes a prot 3_4012534                | 8.4  | promoter          |
| AT4G25570 | (ACYB-2)                           | Encodes cytoch 4_13055818               | 8.39 | promoter          |
| AT1G19000 | na                                 | Homeodomain-l 1_6562908                 | 8.39 | promoter          |
| AT1G22470 | na                                 | unknown proteir 1_7932490               | 8.39 | intergenic        |
| AT5G15040 | na                                 | Paired amphipa 5_4871423                | 8.39 | proximal promoter |
| AT5G15050 | na                                 | Core-2/l-branch 5_4871423               | 8.39 | downstream        |
| AT5G59350 | na                                 | unknown proteir 5_23943460              | 8.38 | intergenic        |
| AT2G26710 | PHYB ACTIVATION TAGGED SUPPRESS    | Encodes a merr 2_11380397               | 8.38 | promoter          |
| AT3G26400 | EUKARYOTIC TRANSLATION INITIATION  | member of eIF4 3_9666223                | 8.37 | promoter          |
| AT5G58450 | na                                 | Tetratricopeptid 5_23626924             | 8.37 | intron            |
| AT5G48200 | na                                 | unknown proteir 5_19545132              | 8.37 | promoter          |
| AT1G70280 | na                                 | NHL domain-co 1_26471002                | 8.37 | proximal promoter |
| AT1G79245 | na                                 | pseudogene of 1_29809426                | 8.37 | intron            |
| AT2G30000 | na                                 | PHF5-like prote 2_12805145              | 8.37 | promoter          |
| AT2G35290 | na                                 | unknown proteir 2_14862190              | 8.37 | promoter          |
| AT3G01560 | na                                 | CONTAINS Inte 3_219606                  | 8.37 | five_prime_UTR    |
| AT5G60850 | OBF BINDING PROTEIN 4 (OBP4)       | Encodes a zinc 5_24478874               | 8.37 | proximal promoter |
| AT5G58440 | SORTING NEXIN 2A (SNX2a)           | sorting nexin 2 <sup>A</sup> 5_23626924 | 8.37 | promoter          |
| AT1G70290 | TREHALOSE-6-PHOSPHATASE SYNTHA     | Encodes an enz 1_26471002               | 8.37 | downstream        |
| AT2G30010 | TRICHOME BIREFRINGENCE-LIKE 45 (T  | Encodes a merr 2_12805145               | 8.37 | proximal promoter |
| AT4G32410 | CELLULOSE SYNTHASE 1 (CESA1)       | Encodes a cellu 4_15646747              | 8.36 | promoter          |
| AT1G52800 | na                                 | 2-oxoglutarate ( 1_19663673             | 8.36 | promoter          |
| AT1G69690 | TEOSINTE BRANCHED1/CYCLOIDEA/PC    | ATCP15 is invc 1_26213681               | 8.36 | proximal promoter |
| AT1G07000 | EXOCYST SUBUNIT EXO70 FAMILY PRC A | member of E) 1_2152584                  | 8.35 | promoter          |
| AT5G19020 | MITOCHONDRIAL EDITING FACTOR 18    | Encodes a pent 5_6352744                | 8.35 | downstream        |
| AT5G19015 | na                                 | transposable elk 5_6352744              | 8.35 | proximal promoter |
| AT5G47818 | na                                 | unknown pseud 5_19365097                | 8.35 | promoter          |
| AT1G07010 | SHEWENELLA-LIKE PROTEIN PHOSPHO    | Calcineurin-like 1_2152584              | 8.35 | promoter          |
| AT4G37460 | SUPPRESSOR OF RPS4-RLD 1 (SRFR1)   | Encodes a tetr: 4_17615870              | 8.35 | promoter          |
| AT1G28670 | (ARAB-1)                           | Arabidopsis thal 1_10076498             | 8.34 | promoter          |
| AT1G14685 | BASIC PENTACYSTEINE 2 (BPC2)       | Encodes a merr 1_5042496                | 8.34 | five_prime_UTR    |
| AT1G70782 | CONSERVED PEPTIDE UPSTREAM OPE     | Upstream open 1_26694861                | 8.34 | intergenic        |
| AT1G70780 | na                                 | unknown proteir 1_26694861              | 8.34 | intergenic        |
| AT1G71828 | na                                 | Potential natura 1_27017946             | 8.34 | exon              |
| AT5G03680 | PETAL LOSS (PTL)                   | Recessive muta 5_957634                 | 8.34 | promoter          |
| AT1G71830 | SOMATIC EMBRYOGENESIS RECEPTO      | Plasma membr: 1_27017946                | 8.34 | promoter          |
| AT5G57180 | CHLOROPLAST IMPORT APPARATUS 2     | Transcription re 5_23169919             | 8.33 | intron            |
| AT5G57181 | na                                 | This gene encod 5_23169919              | 8.33 | proximal promoter |
| AT2G47690 | na                                 | NADH-ubiquino 2_19551130                | 8.33 | promoter          |
| AT1G79750 | NADP-MALIC ENZYME 4 (NADP-ME4)     | The malic enzyr 1_30011654              | 8.33 | promoter          |
| AT1G28660 | na                                 | GDSL-like Lipas 1_10073521              | 8.32 | promoter          |
| AT2G47630 | na                                 | alpha/beta-Hydr 2_19535387              | 8.32 | intron            |
| AT4G34760 | na                                 | SAUR-like auxir 4_16587045              | 8.32 | intergenic        |
| AT2G47620 | SWITCH/SUCROSE NONFERMENTING       | : Homologous to 2_19535387              | 8.32 | intergenic        |
| AT4G19880 | na                                 | Glutathione S-tr 4_10786447             | 8.31 | five_prime_UTR    |
| AT5G55530 | na                                 | Calcium-depend 5_22493242               | 8.31 | intron            |
| AT5G43190 | na                                 | Galactose oxid: 5_17342533              | 8.31 | proximal promoter |
| AT2G27860 | UDP-D-APIOSE/UDP-D-XYLOSE SYNTH    | Encodes UDP-c 2_11866969                | 8.31 | promoter          |
| AT3G10300 | na                                 | Calcium-binding 3_3186222               | 8.3  | promoter          |
| AT2G22420 | na                                 | Peroxidase sup 2_9511589                | 8.3  | proximal promoter |
| AT2G39950 | na                                 | unknown proteir 2_16680663              | 8.3  | promoter          |
| AT1G01140 | CBL-INTERACTING PROTEIN KINASE 9   | Encodes a CBL 1_68497                   | 8.29 | proximal promoter |
| AT2G18650 | MATERNAL EFFECT EMBRYO ARREST      | maternal effect 1_2_8088355             | 8.29 | promoter          |
| AT1G01130 | na                                 | CONTAINS Inte 1_68497                   | 8.29 | intergenic        |
| AT3G48520 | CYTOCHROME P450, FAMILY 94, SUBF   | CYP94B3 is a je 3_17976791              | 8.28 | promoter          |
| AT4G08950 | EXORDIUM (EXO)                     | EXORDIUM (E) 4_5740123                  | 8.28 | promoter          |
| AT1G03870 | FASCICLIN-LIKE ARABINOOGALACTAN    | fasciclin-like ara 1_984219             | 8.28 | proximal promoter |
| AT3G18040 | MAP KINASE 9 (MPK9)                | Encodes a prot 3_6174022                | 8.28 | proximal promoter |
| AT1G05805 | na                                 | basic helix-loop 1_1744722              | 8.28 | promoter          |
| AT1G61170 | na                                 | unknown proteir 1_22549080              | 8.28 | proximal promoter |
| AT3G48515 | na                                 | pre-tRNA; tRNA 3_17976791               | 8.28 | proximal promoter |
| AT1G03860 | PROHIBITIN 2 (PHB2)                | prohibitin 2 1_984219                   | 8.28 | proximal promoter |
| AT5G63770 | DIACYLGLYCEROL KINASE 2 (DGK2)     | a member of the 5_25518517              | 8.27 | promoter          |
| AT3G49940 | LOB DOMAIN-CONTAINING PROTEIN 3E   | LOB domain-co 3_18516321                | 8.27 | intergenic        |
| AT2G34930 | na                                 | disease resistar 2_14740084             | 8.27 | promoter          |
| AT1G72420 | na                                 | NADH:ubiquinoi 1_27265737               | 8.27 | proximal promoter |
| AT1G72430 | na                                 | SAUR-like auxir 1_27265737              | 8.27 | promoter          |
| AT2G31870 | SANSKRIT FOR 'BRIGHT' (TEJ)        | The gene encoc 2_13554079               | 8.27 | promoter          |
| AT4G30600 | na                                 | signal recognitic 4_14941485            | 8.26 | promoter          |
| AT5G26770 | na                                 | unknown proteir 5_9410087               | 8.26 | five_prime_UTR    |
| AT1G01430 | TRICHOME BIREFRINGENCE-LIKE 25 (T  | Encodes a merr 1_159524                 | 8.26 | proximal promoter |
| AT3G21800 | UDP-GLUCOSYL TRANSFERASE 71B8 (    | UDP-glucosyl tr 3_7681924               | 8.26 | promoter          |
| AT5G66030 | (ATGRIP)                           | Involved in qolg 5_26411904             | 8.25 | proximal promoter |
| AT5G66045 | MICRORNA170 (MIR170)               | Encodes a micr 5_26411904               | 8.25 | promoter          |
| AT1G18990 | na                                 | Protein of unkn: 1_6560956              | 8.25 | promoter          |
| AT1G19000 | na                                 | Homeodomain-l 1_6560956                 | 8.25 | three_prime_UTR   |
| AT5G03380 | na                                 | Heavy metal tra 5_834714                | 8.25 | promoter          |
| AT5G66040 | SULFURTRANSFERASE PROTEIN 16 (S    | Encodes a prot 5_26411904               | 8.25 | intergenic        |
| AT5G24930 | CONSTANS-LIKE 4 (COL4)             | CONSTANS-like 5_8587405                 | 8.24 | proximal promoter |
| AT3G29770 | METHYL ESTERASE 11 (MES11)         | Encodes a prot 3_11650948               | 8.24 | downstream        |
| AT3G29786 | na                                 | transposable elk 3_11650948             | 8.24 | proximal promoter |
| AT5G66800 | na                                 | unknown proteir 5_26669261              | 8.24 | proximal promoter |
| AT1G76160 | SKU5 SIMILAR 5 (sk5)               | SKU5 similar 5 1_28581164               | 8.24 | promoter          |
| AT4G37800 | XYLOGLUCAN ENDOTRANSGLUCOSYL       | xyloglucan endc 4_17776352              | 8.24 | intron            |
| AT3G18850 | LYSOPHOSPHATIDYL ACYLTRANSFER      | lysophosphatid, 3_6501468               | 8.23 | promoter          |
| AT3G18860 | na                                 | transducin famil 3_6501468              | 8.23 | promoter          |
| AT2G41900 | OXIDATIVE STRESS 2 (OXS2)          | CCCH-type zinc 2_17489716               | 8.23 | proximal promoter |
| AT1G48320 | DHNA-COA THIOESTERASE 1 (DHNAT1    | Encodes one of 1_17855726               | 8.22 | promoter          |
| AT5G48470 | na                                 | unknown proteir 5_19644637              | 8.22 | intergenic        |
| AT5G48480 | na                                 | Lactoylglutathio 5_19644637             | 8.22 | promoter          |
| AT1G48315 | na                                 | Potential natura 1_17855726             | 8.22 | exon              |
| AT5G37540 | na                                 | Eukaryotic aspa 5_14914178              | 8.22 | exon              |
| AT5G55850 | (NOI)                              | NOI protein 5_22603299                  | 8.21 | promoter          |
| AT2G37630 | ASYMMETRIC LEAVES 1 (AS1)          | Encodes a MYE 2_15784413                | 8.21 | proximal promoter |

|           |                                    |                              |      |                   |
|-----------|------------------------------------|------------------------------|------|-------------------|
| AT4G36540 | BR ENHANCED EXPRESSION 2 (BEE2)    | BR enhanced e_4_17243506     | 8.21 | promoter          |
| AT4G25386 | na                                 | This gene encod 4_12976984   | 8.21 | downstream        |
| AT2G36690 | na                                 | 2-oxoglutarate ( 2_15378697  | 8.21 | proximal promoter |
| AT1G06070 | na                                 | Basic-leucine zi 1_1838229   | 8.21 | proximal promoter |
| AT1G77280 | na                                 | Protein kinase r 1_29035738  | 8.21 | intron            |
| AT1G77290 | na                                 | Glutathione S-tr 1_29035738  | 8.21 | proximal promoter |
| AT2G18440 | GENE WITH UNSTABLE TRANSCRIPT 1    | Encodes a nonc 2_7997378     | 8.2  | promoter          |
| AT1G60150 | na                                 | transposable elk 1_22185822  | 8.2  | proximal promoter |
| AT2G18450 | SUCCINATE DEHYDROGENASE 1-2 (SD    | Nuclear encode 2_7997378     | 8.2  | downstream        |
| AT5G24930 | CONSTANS-LIKE 4 (COL4)             | CONSTANS-like 5_8588703      | 8.19 | proximal promoter |
| AT3G50660 | DWARF 4 (DWF4)                     | Encodes a 22&3_18817830      | 8.19 | proximal promoter |
| AT3G17330 | EVOLUTIONARILY CONSERVED C-TER     | evolutionarily cc 3_5920297  | 8.19 | promoter          |
| AT5G01600 | FERRITIN 1 (FER1)                  | Encodes a ferrit 5_230356    | 8.19 | promoter          |
| AT3G07005 | LOW-MOLECULAR-WEIGHT CYSTEINE-     | Encodes a merr 3_2212637     | 8.19 | downstream        |
| AT5G17980 | na                                 | C2 calcium/lipid 5_5955728   | 8.19 | exon              |
| AT2G28140 | na                                 | Protein of unknt 2_11994223  | 8.19 | proximal promoter |
| AT5G01595 | na                                 | Potential natura 5_230356    | 8.19 | intergenic        |
| AT5G01610 | na                                 | Protein of unknt 5_230356    | 8.19 | proximal promoter |
| AT3G17340 | na                                 | ARM repeat sur 3_5920297     | 8.19 | downstream        |
| AT3G07010 | na                                 | Pectin lyase-like 3_2212637  | 8.19 | downstream        |
| AT5G17990 | TRYPTOPHAN BIOSYNTHESIS 1 (TRP1)   | Encodes the try 5_5955728    | 8.19 | proximal promoter |
| AT5G47040 | LON PROTEASE 2 (LON2)              | Encodes a merr 5_19099649    | 8.18 | proximal promoter |
| AT5G04750 | na                                 | F1F0-ATPase ir 5_1378065     | 8.18 | intergenic        |
| AT5G04760 | na                                 | Duplicated hom 5_1378065     | 8.18 | intergenic        |
| AT5G18620 | CHROMATIN REMODELING FACTOR17      | chromatin remo 5_6202401     | 8.17 | promoter          |
| AT3G43720 | na                                 | Bifunctional inhi 3_15617145 | 8.17 | five_prime_UTR    |
| AT5G11640 | na                                 | Thioredoxin sup 5_3744811    | 8.17 | intergenic        |
| AT5G11650 | na                                 | alpha/beta-Hydr 5_3744811    | 8.17 | promoter          |
| AT5G18630 | na                                 | alpha/beta-Hydr 5_6202401    | 8.17 | promoter          |
| AT5G65683 | WAV3 HOMOLOG 2 (WAVH2)             | Zinc finger (C3f 5_26263306  | 8.17 | exon              |
| AT2G41475 | na                                 | Embryo-specific 2_17296409   | 8.16 | five_prime_UTR    |
| AT2G42990 | na                                 | GDSL-like Lipas 2_17878363   | 8.16 | proximal promoter |
| AT5G53510 | OLIGOPEPTIDE TRANSPORTER 9 (OPT    | oligopeptide tra 5_21733815  | 8.16 | intergenic        |
| AT4G23660 | POLYPRENYLTRANSFERASE 1 (PPT1)     | Encodes para-h 4_12331969    | 8.16 | promoter          |
| AT5G63120 | na                                 | P-loop containir 5_25324103  | 8.15 | proximal promoter |
| AT5G63130 | na                                 | Octicosapeptide 5_25324103   | 8.15 | three_prime_UTR   |
| AT2G23690 | na                                 | unknown proteir 2_10072077   | 8.15 | promoter          |
| AT3G53810 | na                                 | Concanavalin A 3_19936428    | 8.15 | proximal promoter |
| AT5G23730 | REPRESSOR OF UV-B PHOTOMORPHC      | Encodes REPR 5_8003654       | 8.15 | proximal promoter |
| AT5G58530 | na                                 | Glutaredoxin far 5_23658642  | 8.14 | proximal promoter |
| AT2G39390 | na                                 | Ribosomal L29 2_16452516     | 8.14 | proximal promoter |
| AT2G39400 | na                                 | alpha/beta-Hydr 2_16452516   | 8.14 | promoter          |
| AT2G47830 | na                                 | Cation efflux far 2_19595259 | 8.14 | proximal promoter |
| AT2G47844 | na                                 | unknown proteir 2_19595259   | 8.14 | promoter          |
| AT2G47840 | TRANSLOCON AT THE INNER ENVELOF    | Encodes a com 2_19595259     | 8.14 | promoter          |
| AT2G47010 | na                                 | unknown proteir 2_19316390   | 8.13 | proximal promoter |
| AT4G35090 | CATALASE 2 (CAT2)                  | Encodes a pero 4_16704233    | 8.12 | proximal promoter |
| AT4G30900 | na                                 | DNase I-like sui 4_15039392  | 8.12 | promoter          |
| AT4G25830 | na                                 | Uncharacterise 4_13132442    | 8.12 | proximal promoter |
| AT4G27435 | na                                 | Protein of unknt 4_13725376  | 8.12 | intergenic        |
| AT5G49690 | na                                 | UDP-Glycosyltr: 5_20191832   | 8.12 | promoter          |
| AT5G49700 | na                                 | Predicted AT-hc 5_20191832   | 8.12 | proximal promoter |
| AT4G27440 | PROTOCHLOROPHYLLIDE OXIDORED       | light-dependent 4_13725376   | 8.12 | promoter          |
| AT4G30890 | UBIQUITIN-SPECIFIC PROTEASE 24 (UE | Encodes a ubiq 4_15039392    | 8.12 | promoter          |
| AT4G25820 | XYLOGLUCAN ENDOTRANSGLUCOSYL       | Encodes a xylo 4_13132442    | 8.12 | intergenic        |
| AT5G58430 | EXOCYST SUBUNIT EXO70 FAMILY PRC   | A member of E) 5_23623599    | 8.11 | promoter          |
| AT3G14270 | FORMS APLOID AND BINUCLEATE CEL    | Encodes a prot 3_4753767     | 8.11 | promoter          |
| AT3G25070 | RPM1 INTERACTING PROTEIN 4 (RIN4)  | Encodes a merr 3_9132201     | 8.11 | promoter          |
| AT5G58440 | SORTING NEXIN 2A (SNX2a)           | sorting nexin 2a 5_23623599  | 8.11 | intergenic        |
| AT1G16150 | WALL ASSOCIATED KINASE-LIKE 4 (WA  | Encodes a cell- 1_5532076    | 8.11 | promoter          |
| AT2G37640 | (EXP3)                             | member of Alph 2_15789877    | 8.1  | promoter          |
| AT5G20230 | BLUE-COPPER-BINDING PROTEIN (BCE   | Al-stress-induce 5_6826478   | 8.1  | promoter          |
| AT5G20220 | na                                 | zinc knuckle (Ct 5_6826478   | 8.1  | intergenic        |
| AT5G20225 | na                                 | Potential natura 5_6826478   | 8.1  | proximal promoter |
| AT5G01830 | SMALL AUXIN UP RNA 21 (SAUR21)     | ARM repeat sur 5_318397      | 8.1  | proximal promoter |
| AT3G51375 | MICRORNA171A (MIR171A)             | Encodes a micr 3_19072803    | 8.09 | proximal promoter |
| AT3G56370 | na                                 | Leucine-rich rep 3_20903097  | 8.09 | promoter          |
| AT4G27500 | PROTON PUMP INTERACTOR 1 (PPI1)    | interacts with H- 4_13742168 | 8.09 | proximal promoter |
| AT5G19095 | na                                 | pre-tRNA; tRNA 5_6399609     | 8.08 | proximal promoter |
| AT3G52470 | na                                 | Late embryoqer 3_19453304    | 8.08 | intergenic        |
| AT3G52480 | na                                 | unknown proteir 3_19453304   | 8.08 | promoter          |
| AT5G20140 | na                                 | SOUL heme-bir 5_6801614      | 8.08 | proximal promoter |
| AT4G39730 | PLAT DOMAIN PROTEIN 1 (PLAT1)      | Lipase/lipoxyqy 4_18433830   | 8.08 | downstream        |
| AT5G20150 | SPX DOMAIN GENE 1 (SPX1)           | Expression is uj 5_6801614   | 8.08 | proximal promoter |
| AT4G34131 | UDP-GLUCOSYL TRANSFERASE 73B3 (    | UDP-glucosyl tr 4_16345211   | 8.08 | promoter          |
| AT4G34135 | UDP-GLUCOSYLTRANSFERASE 73B2 (l    | The At4g34135 4_16345211     | 8.08 | downstream        |
| AT3G50910 | na                                 | unknown proteir 3_18919288   | 8.07 | promoter          |
| AT5G04470 | SIAMESE (SIM)                      | Encodes a nove 5_1270839     | 8.07 | intergenic        |
| AT1G56580 | SMALLER WITH VARIABLE BRANCHES     | Encodes SMAL 1_21199629      | 8.07 | proximal promoter |
| AT1G05230 | HOMEODOMAIN GLABROUS 2 (HDG2)      | Encodes a hom 1_1518705      | 8.06 | intron            |
| AT1G64050 | na                                 | unknown proteir 1_23762076   | 8.06 | promoter          |
| AT2G28350 | AUXIN RESPONSE FACTOR 10 (ARF10)   | Involved in root 2_12111449  | 8.05 | proximal promoter |
| AT3G61880 | CYTOCHROME P450 78A9 (CYP78A9)     | Encodes a cyto 3_22906537    | 8.05 | exon              |
| AT5G66620 | DA1-RELATED PROTEIN 6 (DAR6)       | DA1-related pro 5_26588343   | 8.05 | promoter          |
| AT2G45160 | HAIRY MERISTEM 1 (HAM1)            | Belongs to one 2_18620428    | 8.05 | promoter          |
| AT3G52290 | IQ-DOMAIN 3 (IQD3)                 | IQ-domain 3 (IQ 3_19392901   | 8.05 | proximal promoter |
| AT2G45161 | na                                 | unknown proteir 2_18620428   | 8.05 | promoter          |
| AT3G27800 | na                                 | unknown proteir 3_10304013   | 8.05 | proximal promoter |
| AT3G52285 | na                                 | pre-tRNA; tRNA 3_19392901    | 8.05 | promoter          |
| AT1G11890 | SECRETION 22 (SEC22)               | member of SEC 1_4010632      | 8.05 | promoter          |
| AT1G11910 | ASPARTIC PROTEINASE A1 (APA1)      | Encodes an asp 1_4021074     | 8.04 | promoter          |
| AT3G04790 | EMBRYO DEFECTIVE 3119 (EMB3119)    | Ribose 5-phosp 3_1315789     | 8.04 | intergenic        |
| AT1G23900 | GAMMA-ADAPTIN 1 (GAMMA-ADAPTIN     | Encodes large 5_1_8440985    | 8.04 | promoter          |
| AT1G37140 | MEI2 C-TERMINAL RRM ONLY LIKE 1 (M | a member of me 1_14165401    | 8.04 | intergenic        |

|           |                                   |                              |      |                   |
|-----------|-----------------------------------|------------------------------|------|-------------------|
| AT2G42910 | na                                | Phosphoribosyl_2_17855388    | 8.04 | proximal promoter |
| AT2G42900 | na                                | Plant basic secr_2_17855388  | 8.04 | exon              |
| AT1G23890 | na                                | NHL domain-co_1_8440985      | 8.04 | promoter          |
| AT2G24800 | na                                | Peroxidase sup_2_10572704    | 8.04 | promoter          |
| AT2G28080 | na                                | UDP-Glycosyltr_2_11961757    | 8.04 | intron            |
| AT5G44290 | na                                | Protein kinase s_5_17843709  | 8.04 | intron            |
| AT3G04800 | TRANSLOCASE INNER MEMBRANE SU     | translocase innr_3_1315789   | 8.04 | proximal promoter |
| AT4G39980 | 3-DEOXY-D-ARABINO-HEPTULOSONAT    | Encodes a 2-de_4_18542450    | 8.03 | intergenic        |
| AT4G37470 | KARRIKIN INSENSITIVE 2 (KAI2)     | HTL belonging t_4_17619061   | 8.03 | proximal promoter |
| AT1G73885 | na                                | unknown protei_1_27785994    | 8.03 | proximal promoter |
| AT1G73875 | na                                | DNase I-like su_1_27785994   | 8.03 | intergenic        |
| AT4G39985 | na                                | pre-tRNA; tRNA_4_18542450    | 8.03 | downstream        |
| AT4G39986 | na                                | This gene enco_4_18542450    | 8.03 | exon              |
| AT4G37480 | na                                | Chaperone Dna_4_17619061     | 8.03 | promoter          |
| AT2G03550 | na                                | alpha/beta-Hydr_2_1076873    | 8.03 | promoter          |
| AT5G44578 | na                                | unknown protei_5_17980217    | 8.03 | intergenic        |
| AT5G44580 | na                                | unknown protei_5_17980217    | 8.03 | three_prime_UTR   |
| AT5G44582 | na                                | unknown protei_5_17980217    | 8.03 | proximal promoter |
| AT3G52525 | OVATE FAMILY PROTEIN 6 (OFP6)     | ovate family pro_3_19475638  | 8.03 | exon              |
| AT4G39990 | RAB GTPASE HOMOLOG A4B (RABA4B)   | GTP-binding prr_4_18542450   | 8.03 | promoter          |
| AT1G73880 | UDP-GLUCOSYL TRANSFERASE 89B1     | ( UDP-glucosyl tr_1_27785994 | 8.03 | exon              |
| AT1G18150 | (ATMPK8)                          | Encodes mitoge_1_6247926     | 8.02 | promoter          |
| AT1G18330 | EARLY-PHYTOCHROME-RESPONSIVE1     | EARLY-PHYTO_1_6308184        | 8.02 | promoter          |
| AT1G18335 | na                                | Acyl-CoA N-acy_1_6308184     | 8.02 | intergenic        |
| AT1G18160 | na                                | Protein kinase s_1_6247926   | 8.02 | proximal promoter |
| AT1G78850 | na                                | curculin-like (m_1_29644325  | 8.02 | proximal promoter |
| AT3G50560 | na                                | NAD(P)-binding_3_18766001    | 8.02 | proximal promoter |
| AT1G10700 | PHOSPHORIBOSYL PYROPHOSPHATE      | Encodes a P-in_1_3553006     | 8.02 | proximal promoter |
| AT2G38170 | CATION EXCHANGER 1 (CAX1)         | Encodes a high_2_15988844    | 8.01 | intergenic        |
| AT3G13405 | MICRORNA169A (MIR169A)            | Encodes a micr_3_4361408     | 8.01 | proximal promoter |
| AT2G38160 | na                                | unknown protei_2_15988844    | 8.01 | promoter          |
| AT3G13410 | na                                | unknown protei_3_4361408     | 8.01 | intergenic        |
| AT2G19810 | OXIDATION-RELATED ZINC FINGER 1 ( | Encodes Oxidat_2_8550209     | 8.01 | promoter          |
| AT1G78240 | TUMOROUS SHOOT DEVELOPMENT 2 (    | Encodes TSD2_1_29438851      | 8.01 | proximal promoter |
| AT2G20300 | ABNORMAL LEAF SHAPE 2 (ALE2)      | Encodes ABNO_2_8760285       | 7.99 | promoter          |
| AT1G30520 | ACYL-ACTIVATING ENZYME 14 (AAE14) | Encodes a chlo_1_10814862    | 7.99 | intergenic        |
| AT1G73687 | MICRORNA159A (MIR159A)            | Encodes a micr_1_27713787    | 7.99 | promoter          |
| AT1G20890 | na                                | unknown protei_1_7267547     | 7.99 | promoter          |
| AT1G68580 | na                                | agenet domain-_1_25752583    | 7.99 | promoter          |
| AT2G39020 | na                                | Although this lo_2_16293108  | 7.99 | proximal promoter |
| AT5G11420 | na                                | FUNCTIONS IN_5_3645955       | 7.99 | exon              |
| AT2G39010 | PLASMA MEMBRANE INTRINSIC PROTE   | plasma membra_2_16293108     | 7.99 | intron            |
| AT1G30530 | UDP-GLUCOSYL TRANSFERASE 78D1 (   | The At1g30530_1_10814862     | 7.99 | five_prime_UTR    |
| AT1G22400 | (UGT85A1)                         | UGT85A1; FUN_1_7907309       | 7.98 | proximal promoter |
| AT4G16520 | AUTOPHAGY 8F (ATG8F)              | autophagy 8f (A_4_9306249    | 7.98 | intergenic        |
| AT4G05150 | na                                | Octicosapeptide_4_2661588    | 7.98 | exon              |
| AT1G12110 | NITRATE TRANSPORTER 1.1 (NRT1.1)  | Encodes NRT1_1_4103395       | 7.98 | proximal promoter |
| AT4G16515 | ROOT MERISTEM GROWTH FACTOR 6     | Encodes a root_4_9306249     | 7.98 | promoter          |
| AT2G46510 | ABA-INDUCIBLE BHLH-TYPE TRANSCRIP | Encodes a nucl_2_19094011    | 7.97 | proximal promoter |
| AT1G51500 | ATP-BINDING CASSETTE G12 (ABCG12) | Encodes an AB_1_19101851     | 7.97 | proximal promoter |
| AT4G02350 | XOCYST COMPLEX COMPONENT SEC      | Encodes a merr_4_1037969     | 7.97 | promoter          |
| AT4G02340 | na                                | alpha/beta-Hydr_4_1037969    | 7.97 | intergenic        |
| AT3G14220 | na                                | GDSL-like Lipas_3_4732420    | 7.97 | promoter          |
| AT3G15518 | na                                | unknown protei_3_5248921     | 7.97 | promoter          |
| AT3G10985 | SENESCENCE ASSOCIATED GENE 20 (   | A senescence-ε_3_3443844     | 7.97 | intergenic        |
| AT1G01480 | 1-AMINO-CYCLOPROPANE-1-CARBOXYL   | a member of the_1_177033     | 7.96 | exon              |
| AT5G18670 | BETA-AMYLASE 3 (BM3)              | putative beta-ar_5_6224079   | 7.96 | proximal promoter |
| AT4G00150 | HAIRY MERISTEM 3 (HAM3)           | Belongs to one_4_56915       | 7.96 | intergenic        |
| AT3G20395 | na                                | RING/U-box su_3_7114033      | 7.96 | promoter          |
| AT4G08949 | na                                | This gene enco_4_5736686     | 7.96 | intergenic        |
| AT5G41401 | na                                | This gene enco_5_16575713    | 7.96 | intergenic        |
| AT5G01849 | na                                | This gene enco_5_332173      | 7.95 | intergenic        |
| AT5G01850 | na                                | Protein kinase s_5_332173    | 7.95 | promoter          |
| AT3G10500 | NAC DOMAIN CONTAINING PROTEIN 5C  | Encodes a trans_3_3271372    | 7.95 | promoter          |
| AT5G59910 | (HTB4)                            | HTB4; FUNCTI(5_24126934      | 7.94 | promoter          |
| AT1G07210 | na                                | Ribosomal prote_1_2214268    | 7.94 | proximal promoter |
| AT2G13363 | na                                | unknown protei_2_5543792     | 7.94 | intergenic        |
| AT2G30430 | na                                | unknown protei_2_12967453    | 7.94 | proximal promoter |
| AT3G13740 | na                                | Ribonuclease III_3_4506904   | 7.94 | intergenic        |
| AT2G30424 | TRICHOMELESS 2 (TCL2)             | In a tandem rep_2_12967453   | 7.94 | proximal promoter |
| AT5G59920 | UV-B LIGHT INSENSITIVE 3 (ULI3)   | Isolated in a scr_5_24126934 | 7.94 | proximal promoter |
| AT2G01910 | (ATMAP65-6)                       | Binds microtub_2_416715      | 7.93 | promoter          |
| AT5G49100 | na                                | unknown protei_5_19897014    | 7.93 | intergenic        |
| AT5G22070 | na                                | Core-2/l-branch_5_7307650    | 7.93 | promoter          |
| AT5G43270 | SQUAMOSA PROMOTER BINDING PROTE   | member of the_5_17363142     | 7.93 | intron            |
| AT4G37800 | XYLOGLUCAN ENDOTRANSGLUCOSYL      | xyloglucan endc_4_17778290   | 7.93 | proximal promoter |
| AT1G20050 | HYDRA1 (HYD1)                     | C-8 sterol isom_1_6948388    | 7.92 | proximal promoter |
| AT5G04200 | METACASPASE 9 (MC9)               | Encodes a puta_5_1152798     | 7.92 | proximal promoter |
| AT1G20040 | na                                | pre-tRNA; tRNA_1_6948388     | 7.92 | intergenic        |
| AT1G11710 | na                                | Pentatricopepti_1_3947248    | 7.92 | proximal promoter |
| AT5G04190 | PHYTOCHROME KINASE SUBSTRATE 4    | Encodes phytoc_5_1152798     | 7.92 | intergenic        |
| AT2G24765 | ADP-RIBOSYLATION FACTOR 3 (ARF3)  | GTPase require_2_10561558    | 7.91 | proximal promoter |
| AT4G17500 | ETHYLENE RESPONSIVE ELEMENT BIND  | Encodes a merr_4_9759178     | 7.91 | promoter          |
| AT3G54804 | na                                | This gene enco_3_20293272    | 7.9  | promoter          |
| AT5G49435 | na                                | pre-tRNA; tRNA_5_20046786    | 7.9  | promoter          |
| AT3G14840 | na                                | Leucine-rich re_3_4988876    | 7.9  | intron            |
| AT2G03890 | PHOSPHOINOSITIDE 4-KINASE GAMMA   | Phosphoinositid_2_1188774    | 7.9  | downstream        |
| AT5G66460 | ENDO-BETA-MANNANASE 7 (MAN7)      | Encodes a endc_5_26541320    | 7.89 | promoter          |
| AT1G31420 | FEI 1 (FE1)                       | Encodes a plasi_1_11249481   | 7.89 | promoter          |
| AT1G31410 | na                                | putrescine-bind_1_11249481   | 7.89 | promoter          |
| AT2G35900 | na                                | unknown protei_2_15073970    | 7.89 | proximal promoter |
| AT2G35910 | na                                | RING/U-box su_2_15073970     | 7.89 | five_prime_UTR    |
| AT3G11690 | na                                | unknown protei_3_3696714     | 7.89 | intergenic        |
| AT2G01670 | NUDIX HYDROLASE HOMOLOG 17 (NUI   | nudix hydrolase_2_296498     | 7.89 | downstream        |



|           |                                                      |                              |      |                   |
|-----------|------------------------------------------------------|------------------------------|------|-------------------|
| AT3G53620 | PYROPHOSPHORYLASE 4 (PPa4)                           | Encodes a solul 3_19880373   | 7.89 | promoter          |
| AT4G23980 | AUXIN RESPONSE FACTOR 9 (ARF9)                       | Encodes auxin i 4_12450377   | 7.88 | proximal promoter |
| AT5G57015 | CASEIN KINASE I-LIKE 12 (cki12)                      | casein kinase I- 5_23070635  | 7.88 | promoter          |
| AT5G20630 | GERMIN 3 (GER3)                                      | Encodes a qern 5_6977960     | 7.88 | proximal promoter |
| AT5G57010 | na                                                   | calmodulin-bind 5_23070635   | 7.88 | downstream        |
| AT1G01540 | na                                                   | Protein kinase s 1_194974    | 7.88 | proximal promoter |
| AT1G15840 | na                                                   | unknown protein 1_5451209    | 7.88 | promoter          |
| AT3G11670 | DIGALACTOSYL DIACYLGLYCEROL DEI                      | Responsible for 3_3684717    | 7.87 | promoter          |
| AT2G05380 | GLYCINE-RICH PROTEIN 3 SHORT ISOF                    | glycine-rich prot 2_1966634  | 7.87 | promoter          |
| AT1G42420 | na                                                   | transposable elk 1_15880492  | 7.87 | proximal promoter |
| AT2G20724 | na                                                   | pseudogene of 2_8933386      | 7.87 | promoter          |
| AT2G20725 | na                                                   | CAAX amino ter 2_8933386     | 7.87 | downstream        |
| AT5G43000 | na                                                   | unknown proteir 5_17246200   | 7.87 | downstream        |
| AT4G14350 | na                                                   | AGC (cAMP-de 4_8261074       | 7.87 | promoter          |
| AT5G25590 | na                                                   | INVOLVED IN: 1 5_8910009     | 7.87 | promoter          |
| AT1G69526 | na                                                   | S-adenosyl-L-m 1_26134616    | 7.87 | intergenic        |
| AT4G14743 | na                                                   | pseudogene, hy 4_8456797     | 7.87 | intergenic        |
| AT5G42990 | UBIQUITIN-CONJUGATING ENZYME 18                      | ubiquitin-conjug 5_17246200  | 7.87 | promoter          |
| AT1G09750 | na                                                   | Eukaryotic aspa 1_3156709    | 7.86 | proximal promoter |
| AT1G50010 | TUBULIN ALPHA-2 CHAIN (TUA2)                         | Encodes alpha- 1_18517458    | 7.86 | promoter          |
| AT4G37750 | AINTEGUMENTA (ANT)                                   | ANT is required 4_17735347   | 7.85 | intergenic        |
| AT1G70300 | K+ UPTAKE PERMEASE 6 (KUP6)                          | potassium trans 1_26480241   | 7.85 | intron            |
| AT5G62890 | na                                                   | Xanthine/uracil 5_25241542   | 7.85 | proximal promoter |
| AT2G42600 | PHOSPHOENOLPYRUVATE CARBOXYL (ATCOAE)                | Encodes one of 2_17741786    | 7.85 | proximal promoter |
| AT2G27490 | na                                                   | AT2G27490 enr 2_11750915     | 7.84 | proximal promoter |
| AT2G36270 | ABA INSENSITIVE 5 (ABI5)                             | Encodes a merr 2_15207614    | 7.84 | promoter          |
| AT2G34925 | CLAVATA3/ESR-RELATED 42 (CLE42)                      | Belongs to a lar 2_14735301  | 7.84 | intergenic        |
| AT5G58760 | DAMAGED DNA BINDING 2 (DDB2)                         | Encodes a DDE 5_23733951     | 7.84 | promoter          |
| AT5G01560 | LECTIN RECEPTOR KINASE A4.3 (LECR)                   | Encodes LecRK 5_221117       | 7.84 | proximal promoter |
| AT5G01570 | na                                                   | unknown proteir 5_221117     | 7.84 | promoter          |
| AT2G36280 | na                                                   | pre-tRNA; tRNA 2_15207614    | 7.84 | intergenic        |
| AT1G14270 | na                                                   | CAAX amino ter 1_4877370     | 7.84 | promoter          |
| AT5G47660 | na                                                   | Homeodomain-l 5_19312821     | 7.84 | promoter          |
| AT1G14280 | PHYTOCHROME KINASE SUBSTRATE 2                       | Encodes phyto 1_4877370      | 7.84 | promoter          |
| AT2G44940 | na                                                   | encodes a mem 2_18535906     | 7.83 | proximal promoter |
| AT3G16400 | NITRILE SPECIFIER PROTEIN 1 (NSP1)                   | Encodes a nitril 3_5565259   | 7.83 | proximal promoter |
| AT2G42200 | SQUAMOSA PROMOTER BINDING PRO                        | Encodes a puta 2_17587119    | 7.83 | promoter          |
| AT5G41905 | MICRORNA166E (MIR166E)                               | Encodes a micr 5_16776353    | 7.82 | proximal promoter |
| AT1G31710 | na                                                   | Copper amine c 1_11353972    | 7.82 | intron            |
| AT1G31720 | na                                                   | Protein of unkn 1_11353972   | 7.82 | proximal promoter |
| AT2G38820 | na                                                   | Protein of unkn 2_16221630   | 7.82 | promoter          |
| AT5G02811 | na                                                   | This gene encoi 5_642339     | 7.82 | downstream        |
| AT5G02815 | na                                                   | pre-tRNA; tRNA 5_642339      | 7.82 | downstream        |
| AT5G19930 | na                                                   | Protein of unkn 5_6739577    | 7.82 | promoter          |
| AT5G19940 | na                                                   | Plastid-lipid ass 5_6739577  | 7.82 | promoter          |
| AT2G39010 | PLASMA MEMBRANE INTRINSIC PROTE                      | plasma membra 2_16290116     | 7.82 | proximal promoter |
| AT5G02820 | ROOT HAIRLESS 2 (RHL2)                               | Involved in the r 5_642339   | 7.82 | promoter          |
| AT4G23020 | TON1 RECRUITING MOTIF 11 (TRM11)                     | unknown proteir 4_12067727   | 7.82 | intron            |
| AT2G34770 | FATTY ACID HYDROXYLASE 1 (FAH1)                      | encodes a fatty 2_14665632   | 7.81 | promoter          |
| AT1G07580 | na                                                   | pre-tRNA; tRNA 1_2335806     | 7.81 | intergenic        |
| AT2G44500 | na                                                   | O-fucosyltransf 2_18372749   | 7.81 | proximal promoter |
| AT5G43120 | na                                                   | ARM-repeat/Tet 5_17315120    | 7.81 | intergenic        |
| AT2G34760 | na                                                   | pseudogene, tu 2_14665632    | 7.81 | intron            |
| AT5G43130 | TBP-ASSOCIATED FACTOR 4 (TAF4)                       | TBP-associated 5_17315120    | 7.81 | intergenic        |
| AT3G06850 | (BCE2)                                               | dihydroliipoamid 3_2160704   | 7.8  | promoter          |
| AT3G13970 | AUTOPHAGY 12 B (APG12B)                              | AUTOPHAGY 1 3_4616460        | 7.8  | proximal promoter |
| AT4G39350 | CELLULOSE SYNTHASE A2 (CESA2)                        | Encodes a cellu 4_18296466   | 7.8  | promoter          |
| AT1G15175 | na                                                   | Potential natura 1_5224262   | 7.8  | promoter          |
| AT1G15180 | na                                                   | MATE efflux fan 1_5224262    | 7.8  | promoter          |
| AT4G38950 | na                                                   | ATP binding mic 4_18160068   | 7.8  | promoter          |
| AT4G24370 | na                                                   | unknown proteir 4_12612329   | 7.8  | promoter          |
| AT4G24380 | na                                                   | INVOLVED IN: 4_12612329      | 7.8  | promoter          |
| AT1G05370 | na                                                   | Sec14p-like phc 1_1569986    | 7.8  | exon              |
| AT1G48100 | na                                                   | Pectin lyase-like 1_17768464 | 7.8  | intron            |
| AT3G24542 | na                                                   | Beta-galactosid 3_8958140    | 7.8  | intergenic        |
| AT3G24550 | PROLINE-RICH EXTENSIN-LIKE RECEPTOR (SIZ1)           | Encodes a merr 3_8958140     | 7.8  | proximal promoter |
| AT5G60410 | na                                                   | Encodes a plar 5_24294752    | 7.79 | promoter          |
| AT2G35690 | ACYL-COA OXIDASE 5 (ACX5)                            | Encodes an acy 2_14999136    | 7.79 | proximal promoter |
| AT2G35680 | na                                                   | Phosphotyrosin 2_14999136    | 7.79 | promoter          |
| AT5G15080 | na                                                   | Protein kinase s 5_4886828   | 7.79 | intron            |
| AT5G66820 | na                                                   | unknown proteir 5_26688273   | 7.79 | proximal promoter |
| AT2G28350 | AUXIN RESPONSE FACTOR 10 (ARF10)                     | Involved in root 2_12114086  | 7.78 | promoter          |
| AT1G25250 | INDETERMINATE(ID)-DOMAIN 16 (IDD16)                  | indeterminate(lf 1_8852055   | 7.78 | intergenic        |
| AT1G22180 | na                                                   | Sec14p-like phc 1_7832852    | 7.78 | proximal promoter |
| AT3G63510 | na                                                   | FMN-linked oxi 3_23450378    | 7.78 | promoter          |
| AT1G63640 | na                                                   | P-loop nucleosir 1_23597482  | 7.78 | proximal promoter |
| AT3G63500 | TITANIA 2 (TTA2)                                     | Encodes a PHD 3_23450378     | 7.78 | promoter          |
| AT5G65140 | TREHALOSE-6-PHOSPHATE PHOSPHATASE (TPP)              | Haloacid dehalc 5_26022401   | 7.78 | promoter          |
| AT5G46330 | FLAGELLIN-SENSITIVE 2 (FLS2)                         | Encodes a leuci 5_18791581   | 7.77 | promoter          |
| AT5G02490 | (Hsp70-2)                                            | Heat shock prot 5_552959     | 7.76 | promoter          |
| AT5G02500 | HEAT SHOCK COGNATE PROTEIN 70-1                      | encodes a mem 5_552959       | 7.76 | intergenic        |
| AT4G13940 | HOMOLOGY-DEPENDENT GENE SILENCING                    | Encodes a S-ac 4_8054726     | 7.76 | promoter          |
| AT1G33450 | na                                                   | transposable elk 1_12138646  | 7.76 | proximal promoter |
| AT2G46787 | na                                                   | unknown proteir 2_19232454   | 7.76 | exon              |
| AT1G05410 | na                                                   | Protein of unkn 1_1588025    | 7.76 | promoter          |
| AT1G80610 | na                                                   | unknown proteir 1_30302938   | 7.76 | intron            |
| AT2G15950 | na                                                   | pre-tRNA; tRNA 2_6946732     | 7.76 | downstream        |
| AT2G15960 | na                                                   | unknown proteir 2_6946732    | 7.76 | proximal promoter |
| AT5G27350 | (SFP1)                                               | Encodes a sug 5_9652917      | 7.75 | intron            |
| AT5G27360 | (SFP2)                                               | Encodes a sug 5_9652917      | 7.75 | intergenic        |
| AT5G47230 | ETHYLENE RESPONSIVE ELEMENT BINDING PROTEIN 1 (ERF1) | encodes a mem 5_19180901     | 7.75 | exon              |
| AT5G20270 | HEPTAHELICAL TRANSMEMBRANE PROTEIN 1 (HTP1)          | heptahelical trar 5_6842924  | 7.75 | promoter          |
| AT4G02425 | na                                                   | unknown proteir 4_1067002    | 7.75 | intergenic        |
| AT4G02420 | na                                                   | Concanavalin A 4_1067002     | 7.75 | proximal promoter |

|           |                                     |                   |               |      |                   |
|-----------|-------------------------------------|-------------------|---------------|------|-------------------|
| AT5G47229 | na                                  | This gene encodes | 5_19180901    | 7.75 | proximal promoter |
| AT3G60640 | AUTOPHAGY 8G (ATG8G)                | AUTOPHAGY 8       | 3_22417450    | 7.74 | intergenic        |
| AT5G56500 | CHAPERONIN-60BETA3 (CPN60BETA3)     | Encodes a subu    | 5_22873546    | 7.74 | promoter          |
| AT5G56490 | L-GULONON-1,4-LACTONE (L-GULL) O)   | D-arabinono-1,4   | 5_22873546    | 7.74 | downstream        |
| AT3G03456 | na                                  | unknown protei    | 3_822777      | 7.74 | promoter          |
| AT3G03460 | na                                  | unknown protei    | 3_822777      | 7.74 | downstream        |
| AT4G04560 | na                                  | transposable el   | 4_2289066     | 7.74 | proximal promoter |
| AT3G14230 | RELATED TO AP2 2 (RAP2.2)           | encodes a mem     | 3_4740602     | 7.74 | proximal promoter |
| AT5G02150 | FES1C (Fes1C)                       | Encodes one of    | 5_427393      | 7.73 | proximal promoter |
| AT1G06180 | MYB DOMAIN PROTEIN 13 (MYB13)       | member of MYE     | 1_1888771     | 7.73 | proximal promoter |
| AT3G47940 | na                                  | DNAJ heat shoc    | 3_17690953    | 7.73 | proximal promoter |
| AT4G38930 | na                                  | Ubiquitin fusio   | 4_18151992    | 7.73 | downstream        |
| AT4G38932 | na                                  | Potential natura  | 4_18151992    | 7.73 | exon              |
| AT4G38940 | na                                  | Galactose oxid    | 4_18151992    | 7.73 | proximal promoter |
| AT3G61962 | na                                  | This gene enc     | 3_22949547    | 7.73 | proximal promoter |
| AT5G56220 | na                                  | P-loop contain    | 5_22758207    | 7.73 | intergenic        |
| AT5G56240 | na                                  | INVOLVED IN:      | 15_22758207   | 7.73 | intergenic        |
| AT5G02160 | na                                  | unknown protei    | 5_427393      | 7.73 | downstream        |
| AT5G02170 | na                                  | Transmembran      | 5_427393      | 7.73 | promoter          |
| AT2G02950 | PHYTOCHROME KINASE SUBSTRATE 1      | Encodes a basi    | 2_856669      | 7.73 | promoter          |
| AT5G56230 | PRENYLATED RAB ACCEPTOR 1.G2 (P     | prenylated RAB    | 5_22758207    | 7.73 | intergenic        |
| AT4G36860 | na                                  | LIM domain-cor    | 4_17363724    | 7.72 | proximal promoter |
| AT4G27960 | UBIQUITIN CONJUGATING ENZYME 9 (U   | biubiquitin conju | 4_13917571    | 7.72 | promoter          |
| AT3G12380 | ACTIN-RELATED PROTEIN 5 (ARP5)      | Encodes a gene    | 3_3942128     | 7.71 | promoter          |
| AT3G62100 | INDOLE-3-ACETIC ACID INDUCIBLE 30 ( | Encodes a mem     | 3_22995175    | 7.71 | proximal promoter |
| AT3G12385 | na                                  | pre-tRNA; tRNA    | 3_3942128     | 7.71 | downstream        |
| AT3G12390 | na                                  | Nascent polype    | 3_3942128     | 7.71 | promoter          |
| AT4G18670 | na                                  | Leucine-rich re   | 4_10279378    | 7.71 | proximal promoter |
| AT5G64220 | na                                  | Calmodulin-bin    | 5_25685991    | 7.71 | promoter          |
| AT3G62097 | na                                  | This gene enc     | 3_22995175    | 7.71 | proximal promoter |
| AT4G00180 | YABBY3 (YAB3)                       | YABBY gene fai    | 4_76606       | 7.71 | proximal promoter |
| AT1G08920 | ERD (EARLY RESPONSE TO DEHYDRAT     | Encodes ESL1,     | 1_2864193     | 7.7  | intergenic        |
| AT1G66230 | MYB DOMAIN PROTEIN 20 (MYB20)       | Encodes a puta    | 1_24677124    | 7.7  | promoter          |
| AT1G12760 | na                                  | Zinc finger, C3F  | 1_4348459     | 7.7  | promoter          |
| AT3G13040 | na                                  | myb-like HTH tr   | 3_4176407     | 7.7  | proximal promoter |
| AT3G13050 | NICOTINATE TRANSPORTER (NiaP)       | Encodes a plan    | 3_4176407     | 7.7  | promoter          |
| AT1G12750 | RHOMBOID-LIKE PROTEIN 6 (RBL6)      | RHOMBOID-like     | 1_4348459     | 7.7  | promoter          |
| AT5G02500 | HEAT SHOCK COGNATE PROTEIN 70-1     | encodes a mem     | 5_556556      | 7.69 | promoter          |
| AT5G07290 | MEI2-LIKE 4 (ML4)                   | AML4 A memb       | 5_2292417     | 7.69 | proximal promoter |
| AT3G26511 | na                                  | unknown protei    | 3_9718048     | 7.69 | intergenic        |
| AT1G02630 | na                                  | Nucleoside tran   | 1_559881      | 7.69 | intergenic        |
| AT3G60966 | na                                  | RING/U-box su     | 3_22553383    | 7.69 | three_prime_UTR   |
| AT5G65110 | ACYL-COA OXIDASE 2 (ACX2)           | Encodes an acy    | 5_26012721    | 7.67 | promoter          |
| AT5G65670 | INDOLE-3-ACETIC ACID INDUCIBLE 9 (I | auxin (indole-3-  | 5_26250979    | 7.67 | proximal promoter |
| AT5G65120 | na                                  | unknown protei    | 5_26012721    | 7.67 | promoter          |
| AT3G11690 | na                                  | unknown protei    | 3_3691917     | 7.67 | intergenic        |
| AT5G13340 | na                                  | unknown protei    | 5_4277104     | 7.67 | intergenic        |
| AT1G60190 | PLANT U-BOX 19 (PUB19)              | Encodes PUB1      | 1_22198174    | 7.67 | promoter          |
| AT5G16190 | CELLULOSE SYNTHASE LIKE A11 (CSL    | encodes a gene    | 5_5288010     | 7.66 | proximal promoter |
| AT2G45050 | GATA TRANSCRIPTION FACTOR 2 (GAT    | Encodes a mem     | 2_18580291    | 7.66 | proximal promoter |
| AT3G57540 | na                                  | Remorin family    | 1_3_21303165  | 7.66 | promoter          |
| AT5G59700 | na                                  | Protein kinase    | s 5_24055937  | 7.66 | proximal promoter |
| AT4G36830 | (HOS3-1)                            | HOS3-1; JUNC      | 4_17350198    | 7.65 | exon              |
| AT1G79110 | BOI-RELATED GENE 2 (BRG2)           | Encodes one of    | 1_29761047    | 7.65 | intergenic        |
| AT4G36820 | na                                  | Protein of unkn   | 4_17350198    | 7.65 | intergenic        |
| AT5G18830 | SQUAMOSA PROMOTER BINDING PRO       | Encodes a mem     | 5_6274955     | 7.65 | proximal promoter |
| AT3G47160 | na                                  | RING/U-box su     | 3_17362216    | 7.64 | promoter          |
| AT1G16260 | na                                  | Wall-associat     | ec 1_5562906  | 7.64 | proximal promoter |
| AT1G16270 | na                                  | Protein kinase    | s 1_5562906   | 7.64 | promoter          |
| AT3G54920 | POWDERY MILDEW RESISTANT 6 (PMF     | Powdery mildew    | 3_20346830    | 7.64 | intron            |
| AT4G34410 | REDOX RESPONSIVE TRANSCRIPTION      | encodes a mem     | 4_16450785    | 7.64 | proximal promoter |
| AT5G40380 | CYSTEINE-RICH RLK (RECEPTOR-LIKE    | Encodes a cyst    | 5_16151411    | 7.63 | promoter          |
| AT4G02425 | na                                  | unknown protei    | 4_1068921     | 7.63 | promoter          |
| AT3G01430 | na                                  | BEST Arabidop     | 3_165642      | 7.63 | exon              |
| AT1G15757 | na                                  | Encodes a defe    | 1_5423283     | 7.63 | intergenic        |
| AT2G24280 | na                                  | alpha/beta-Hyd    | 2_10331909    | 7.63 | proximal promoter |
| AT2G31800 | na                                  | Integrin-linked   | p 2_13523988  | 7.63 | promoter          |
| AT2G31810 | na                                  | ACT domain-co     | 2_13523988    | 7.63 | promoter          |
| AT3G01850 | na                                  | Aldolase-type     | T 3_303503    | 7.63 | proximal promoter |
| AT3G01860 | na                                  | unknown protei    | 3_303503      | 7.63 | intron            |
| AT4G18570 | na                                  | Tetratricopept    | id 4_10231366 | 7.63 | five_prime_UTR    |
| AT5G51910 | na                                  | TCP family tran   | 5_21095048    | 7.63 | exon              |
| AT4G04890 | PROTODERMAL FACTOR 2 (PDF2)         | Encodes a hom     | 4_2482377     | 7.63 | promoter          |
| AT4G02430 | SERINE/ARGININE-RICH PROTEIN SPLI   | Barta et al (201  | 4_1068921     | 7.63 | promoter          |
| AT2G01930 | BASIC PENTACYSTEINE1 (BPC1)         | BASIC PENTAC      | 2_428723      | 7.62 | five_prime_UTR    |
| AT2G29420 | GLUTATHIONE S-TRANSFERASE TAU 7     | Encodes glutath   | 2_12619024    | 7.62 | promoter          |
| AT1G08810 | MYB DOMAIN PROTEIN 60 (MYB60)       | putative transcr  | 1_2820433     | 7.62 | promoter          |
| AT3G50340 | na                                  | unknown protei    | 3_18664990    | 7.62 | downstream        |
| AT4G20880 | na                                  | ethylene-respor   | 4_11180787    | 7.62 | five_prime_UTR    |
| AT1G05860 | na                                  | unknown protei    | 1_1768871     | 7.62 | promoter          |
| AT1G05850 | POM-POM1 (POM1)                     | Encodes an enc    | 1_1768871     | 7.62 | promoter          |
| AT2G46860 | PYROPHOSPHORYLASE 3 (PPa3)          | Encodes a prote   | 2_19255680    | 7.62 | intergenic        |
| AT3G53350 | ROP INTERACTIVE PARTNER 4 (RIP4)    | ROP interactive   | 3_19782933    | 7.62 | promoter          |
| AT3G50830 | COLD-REGULATED 413-PLASMA MEMB      | cold acclimation  | 3_18892501    | 7.61 | intergenic        |
| AT1G10960 | FERREROXIN 1 (FD1)                  | ferredoxin 1 (F   | C 1_3664222   | 7.61 | promoter          |
| AT1G53080 | na                                  | Legume lectin     | f 1_19782864  | 7.61 | intergenic        |
| AT3G50825 | na                                  | snoRNA; snoR      | N 3_18892501  | 7.61 | intergenic        |
| AT1G09250 | na                                  | basic helix-loop  | 1_2991476     | 7.61 | intergenic        |
| AT3G20340 | na                                  | Expression of     | tf 3_7094418  | 7.61 | proximal promoter |
| AT2G43340 | na                                  | Protein of unkn   | 2_18007553    | 7.61 | promoter          |
| AT5G47190 | na                                  | Ribosomal prote   | 5_19166900    | 7.61 | proximal promoter |
| AT5G40960 | na                                  | Protein of unkn   | 5_16413480    | 7.61 | promoter          |
| AT5G40970 | na                                  | Protein of unkn   | 5_16413480    | 7.61 | proximal promoter |
| AT3G50820 | PHOTOSYSTEM II SUBUNIT O-2 (PSB2    | Encodes a prot    | 3_18892501    | 7.61 | promoter          |

|           |                                     |                              |      |                   |
|-----------|-------------------------------------|------------------------------|------|-------------------|
| AT3G20330 | PYRIMIDINE B (PYRB)                 | encodes aspart: 3_7094418    | 7.61 | proximal promoter |
| AT5G47200 | RAB GTPASE HOMOLOG 1A (RAB1A)       | AtRabD2b encc 5_19166900     | 7.61 | promoter          |
| AT1G53090 | SPA1-RELATED 4 (SPA4)               | Encodes a merr 1_19782864    | 7.61 | promoter          |
| AT1G10950 | TRANSMEMBRANE NINE 1 (TMN1)         | Encodes an Ara 1_3664222     | 7.61 | intergenic        |
| AT3G53402 | CONSERVED PEPTIDE UPSTREAM OPE      | Upstream open 3_19798163     | 7.6  | five_prime_UTR    |
| AT4G23220 | CYSTEINE-RICH RLK (RECEPTOR-LIKE    | Encodes a cystr 4_12157159   | 7.6  | promoter          |
| AT4G29740 | CYTOKININ OXIDASE 4 (CKX4)          | It encodes a prc 4_14564762  | 7.6  | proximal promoter |
| AT3G47540 | na                                  | Chitinase family 3_17523323  | 7.6  | intergenic        |
| AT3G47550 | na                                  | RING/FYVE/PH 3_17523323      | 7.6  | promoter          |
| AT3G53400 | na                                  | BEST Arabidop: 3_19798163    | 7.6  | five_prime_UTR    |
| AT4G29735 | na                                  | unknown proteir 4_14564762   | 7.6  | promoter          |
| AT5G59030 | COPPER TRANSPORTER 1 (COPT1)        | encodes a putar 5_23833483   | 7.59 | intergenic        |
| AT3G23050 | INDOLE-3-ACETIC ACID 7 (IAA7)       | Transcription re 3_8196957   | 7.59 | three_prime_UTR   |
| AT3G27090 | na                                  | DCD (Developn 3_9989492      | 7.59 | promoter          |
| AT3G23750 | na                                  | Leucine-rich ref 3_8557677   | 7.59 | proximal promoter |
| AT1G76900 | TUBBY LIKE PROTEIN 1 (TLP1)         | Member of TLP 1_28880431     | 7.59 | proximal promoter |
| AT2G07050 | CYCLOARTENOL SYNTHASE 1 (CAS1)      | Involved in the t 2_2924403  | 7.58 | promoter          |
| AT3G14990 | DJ-1 HOMOLOG A (DJ1A)               | Encodes a hom 3_5047210      | 7.58 | promoter          |
| AT1G51940 | LYSM-CONTAINING RECEPTOR-LIKE KI    | Encodes a LysM 1_19300143    | 7.58 | proximal promoter |
| AT2G43880 | na                                  | Pectin lyase-like 2_18171237 | 7.58 | proximal promoter |
| AT4G39160 | na                                  | Homeodomain-l 4_18240213     | 7.58 | intron            |
| AT4G39170 | na                                  | Sec14p-like phc 4_18240213   | 7.58 | promoter          |
| AT5G24870 | na                                  | RING/U-box suj 5_8548636     | 7.58 | proximal promoter |
| AT3G15000 | RNA-EDITING FACTOR INTERACTING P    | Encodes RIP1 ( 3_5047210     | 7.58 | intergenic        |
| AT1G71080 | na                                  | RNA polymera 1_26812014      | 7.57 | promoter          |
| AT3G42160 | na                                  | Pectin lyase-like 3_14316482 | 7.57 | intergenic        |
| AT4G17670 | na                                  | Protein of unknk 4_9835526   | 7.57 | proximal promoter |
| AT5G52430 | na                                  | hydroxyproline-i 5_21285282  | 7.57 | promoter          |
| AT3G26720 | na                                  | Glycosyl hydrolk 3_9823629   | 7.57 | intergenic        |
| AT3G26730 | na                                  | RING/U-box suj 3_9823629     | 7.57 | promoter          |
| AT3G61070 | PEROXIN 11E (PEX11E)                | member of the r 3_22602824   | 7.57 | intergenic        |
| AT3G61060 | PHLOEM PROTEIN 2-A13 (PP2-A13)      | phloem protein : 3_22602824  | 7.57 | promoter          |
| AT3G11910 | UBIQUITIN-SPECIFIC PROTEASE 13 (UE  | ubiquitin-specifi 3_3770578  | 7.57 | promoter          |
| AT5G08130 | (BIM1)                              | Arabidopsis thal 5_2612961   | 7.56 | proximal promoter |
| AT4G29900 | AUTOINHIBITED CA(2+)-ATPASE 10 (AC  | one of the type 1 4_14624846 | 7.56 | intergenic        |
| AT3G63060 | EID1-LIKE 3 (EDL3)                  | EDL3 is an F-bc 3_23302120   | 7.56 | proximal promoter |
| AT4G38680 | GLYCINE RICH PROTEIN 2 (GRP2)       | Encodes a glyci 4_18071724   | 7.56 | downstream        |
| AT2G20980 | MINICHROMOSOME MAINTENANCE 10       | Similar to MCM: 2_9014114    | 7.56 | promoter          |
| AT5G01734 | na                                  | unknown proteir 5_279738     | 7.56 | proximal promoter |
| AT5G01740 | na                                  | Nuclear transpc 5_279738     | 7.56 | proximal promoter |
| AT4G38670 | na                                  | Pathogenesis-rr 4_18071724   | 7.56 | promoter          |
| AT4G38690 | na                                  | PLC-like phospl 4_18071724   | 7.56 | intergenic        |
| AT2G20990 | SYNAPTOTAGMIN A (SYTA)              | Encodes a plasi 2_9014114    | 7.56 | promoter          |
| AT5G63420 | EMBRYO DEFECTIVE 2746 (emb2746)     | embryo defectiv 5_25398968   | 7.55 | proximal promoter |
| AT5G20900 | JASMONATE-ZIM-DOMAIN PROTEIN 12     | jasmonate-zim- 5_7090619     | 7.55 | promoter          |
| AT2G14050 | MINICHROMOSOME MAINTENANCE 9 (I     | minichromosom 2_5914071      | 7.55 | intergenic        |
| AT1G53500 | MUCILAGE-MODIFIED 4 (MUM4)          | encodes a putar 1_19969711   | 7.55 | five_prime_UTR    |
| AT2G14060 | na                                  | encodes a prote 2_5914071    | 7.55 | intergenic        |
| AT5G44010 | na                                  | unknown proteir 5_17707008   | 7.55 | three_prime_UTR   |
| AT5G63410 | na                                  | Leucine-rich ref 5_25398968  | 7.55 | proximal promoter |
| AT5G20890 | na                                  | TCP-1/cpn60 ct 5_7090619     | 7.55 | proximal promoter |
| AT1G54080 | OLIGOURIDYLATE-BINDING PROTEIN 1    | oligouridylate-bi 1_20187089 | 7.55 | five_prime_UTR    |
| AT1G08650 | PHOSPHOENOLPYRUVATE CARBOXYL        | Encodes a phos 1_2755742     | 7.55 | intergenic        |
| AT5G22770 | ALPHA-ADAPTIN (alpha-ADR)           | alpha-adaptin (ε 5_7588494   | 7.54 | promoter          |
| AT3G23637 | DEVIL 21 (DVL21)                    | Member of a far 3_8500649    | 7.54 | proximal promoter |
| AT5G66120 | na                                  | 3-dehydroquina 5_26433880    | 7.54 | promoter          |
| AT2G03240 | na                                  | EXS (ERD1/XPI 2_977621       | 7.54 | promoter          |
| AT1G21400 | na                                  | Thiamin diphost 1_7494248    | 7.54 | intron            |
| AT1G35140 | PHOSPHATE-INDUCED 1 (PHI-1)         | EXL1 is involve 1_12851857   | 7.54 | promoter          |
| AT4G14560 | INDOLE-3-ACETIC ACID INDUCIBLE (IAA | auxin (indole-3- 4_8360932   | 7.53 | promoter          |
| AT3G52800 | na                                  | A20/AN1-like zir 3_19570443  | 7.53 | three_prime_UTR   |
| AT3G21560 | UDP-GLUCOSYL TRANSFERASE 84A2       | Encodes a prote 3_7598864    | 7.53 | intergenic        |
| AT1G29300 | UNFERTILIZED EMBRYO SAC 1 (UNE1)    | unfertilized emb 1_10248028  | 7.53 | three_prime_UTR   |
| AT1G26810 | GALACTOSYLTRANSFERASE1 (GALT1)      | Encodes a prote 1_9286381    | 7.52 | intergenic        |
| AT5G27920 | na                                  | F-box family prc 5_9944982   | 7.52 | promoter          |
| AT3G19010 | na                                  | 2-oxoglutarate ( 3_6557096   | 7.52 | intron            |
| AT1G07870 | na                                  | Protein kinase s 1_2432153   | 7.52 | promoter          |
| AT1G26800 | na                                  | RING/U-box suj 1_9286381     | 7.52 | promoter          |
| AT5G47390 | na                                  | myb-like transcr 5_19229055  | 7.52 | downstream        |
| AT5G47400 | na                                  | unknown proteir 5_19229055   | 7.52 | promoter          |
| AT3G55500 | EXPANSIN A16 (EXPA16)               | expansin-like pr 3_20577591  | 7.51 | proximal promoter |
| AT5G59480 | na                                  | Haloacid dehalc 5_23981634   | 7.51 | promoter          |
| AT1G15730 | na                                  | Cobalamin bios: 1_5410783    | 7.51 | proximal promoter |
| AT1G15740 | na                                  | Leucine-rich ref 1_5410783   | 7.51 | promoter          |
| AT5G57660 | CONSTANS-LIKE 5 (COL5)              | CONSTANS-like 5_23352438     | 7.5  | intergenic        |
| AT5G41774 | na                                  | This gene enccr 5_16722207   | 7.5  | exon              |
| AT5G12040 | na                                  | Nitrilase/cyanid 5_3885072   | 7.5  | five_prime_UTR    |
| AT5G19770 | TUBULIN ALPHA-3 (TUA3)              | tubulin 3 5_6684640          | 7.5  | promoter          |
| AT5G59220 | HIGHLY ABA-INDUCED PP2C GENE 1 (H   | highly ABA-indu 5_23898693   | 7.49 | proximal promoter |
| AT4G03420 | na                                  | Protein of unknk 4_1510241   | 7.49 | proximal promoter |
| AT3G15450 | na                                  | Aluminium indur 3_5213023    | 7.49 | five_prime_UTR    |
| AT3G15460 | na                                  | Ribosomal RNA 3_5213023      | 7.49 | intergenic        |
| AT3G16800 | na                                  | Protein phosphz 3_5719057    | 7.49 | proximal promoter |
| AT3G15430 | na                                  | Regulator of chr 3_5213023   | 7.49 | intergenic        |
| AT1G32700 | na                                  | PLATZ transcrip 1_11827414   | 7.49 | promoter          |
| AT2G25200 | na                                  | Plant protein of 2_10737756  | 7.49 | promoter          |
| AT3G16785 | PHOSPHOLIPASE D P1 (PLDP1)          | Encodes a merr 3_5719057     | 7.49 | downstream        |
| AT3G22380 | TIME FOR COFFEE (TIC)               | Encodes a nucl 3_7919883     | 7.49 | intergenic        |
| AT3G08980 | na                                  | Peptidase S24/ 3_2742833     | 7.48 | downstream        |
| AT3G08990 | na                                  | Yippee family pr 3_2742833   | 7.48 | promoter          |
| AT2G18960 | H(+)-ATPASE 1 (HA1)                 | Encodes a plasi 2_8222940    | 7.47 | intron            |
| AT3G63210 | (MARD1)                             | encodes a nove 3_23355263    | 7.46 | promoter          |
| AT1G23360 | (MENG)                              | Encodes a 2-ph 1_8298393     | 7.46 | proximal promoter |
| AT1G69530 | EXPANSIN A1 (EXPA1)                 | Member of Alpha 1_26144616   | 7.46 | intergenic        |

|           |                                                                |                               |      |                   |
|-----------|----------------------------------------------------------------|-------------------------------|------|-------------------|
| AT1G55110 | INDETERMINATE(ID)-DOMAIN 7 (IDD7)                              | indeterminate(lf_1_20561324   | 7.46 | intron            |
| AT1G23380 | KNOTTED1-LIKE HOMEODOMAIN GENE 6 (KNOTTED1-LIKE HOMEODOMAIN 6) | homeodomain t1_1_8298393      | 7.46 | intron            |
| AT3G19025 | na                                                             | pseudogene, sir_3_6564616     | 7.46 | intergenic        |
| AT3G19030 | na                                                             | unknown proteir_3_6564616     | 7.46 | promoter          |
| AT3G19035 | na                                                             | unknown proteir_3_6564616     | 7.46 | proximal promoter |
| AT3G01690 | na                                                             | alpha/beta-Hydr_3_255777      | 7.46 | proximal promoter |
| AT3G63220 | na                                                             | Galactose oxidase_3_23355263  | 7.46 | intergenic        |
| AT4G13110 | na                                                             | BSD domain-co_4_7641376       | 7.46 | promoter          |
| AT1G80460 | NONHOST RESISTANCE TO P. S. PHAS                               | Encodes a prot_1_30249343     | 7.46 | promoter          |
| AT3G01680 | SIEVE-ELEMENT-OCCLUSION-RELATED                                | Encodes a prot_3_255777       | 7.46 | intergenic        |
| AT5G63050 | EMBRYO DEFECTIVE 2759 (EMB2759)                                | embryo defectiv_5_25291733    | 7.45 | proximal promoter |
| AT1G26770 | EXPANSIN A10 (EXPA10)                                          | Encodes an exp_1_9261440      | 7.45 | downstream        |
| AT2G43330 | INOSITOL TRANSPORTER 1 (INT1)                                  | Encodes a tono_2_18000743     | 7.45 | promoter          |
| AT4G27940 | MANGANESE TRACKING FACTOR FOR                                  | manganese trac_4_13904310     | 7.45 | promoter          |
| AT2G43320 | na                                                             | S-adenosyl-L-m_2_18000743     | 7.45 | proximal promoter |
| AT5G63180 | na                                                             | Pectin lyase-like_5_25344162  | 7.45 | proximal promoter |
| AT5G63190 | na                                                             | MA3 domain-co_5_25344162      | 7.45 | proximal promoter |
| AT1G15500 | (ATNTT2)                                                       | ATNTT2; FUNC_1_5325265        | 7.44 | proximal promoter |
| AT1G79350 | EMBRYO DEFECTIVE 1135 (EMB1135)                                | embryo defectiv_1_29853642    | 7.44 | promoter          |
| AT4G40060 | HOMEODOMAIN PROTEIN 16 (HB16)                                  | Encodes a hom_4_18569726      | 7.44 | intergenic        |
| AT5G65310 | HOMEODOMAIN PROTEIN 5 (HB5)                                    | Encodes a clas_5_26105348     | 7.44 | proximal promoter |
| AT2G28056 | MICRORNA172A (MIR172A)                                         | Encodes a micr_2_11941304     | 7.44 | intergenic        |
| AT2G28053 | na                                                             | transposable elk_2_11941304   | 7.44 | proximal promoter |
| AT3G11825 | na                                                             | Encodes a Prot_3_3731068      | 7.44 | proximal promoter |
| AT5G43450 | na                                                             | encodes a prote_5_17456798    | 7.44 | intergenic        |
| AT5G51770 | na                                                             | Protein kinase s_5_21029858   | 7.44 | proximal promoter |
| AT5G43440 | na                                                             | encodes a prote_5_17456798    | 7.44 | promoter          |
| AT1G79360 | ORGANIC CATION/CARNITINE TRANSPORTER                           | organic cation/c_1_29853642   | 7.44 | intergenic        |
| AT1G31340 | RELATED TO UBIQUITIN 1 (RUB1)                                  | Encodes a ubiq_1_11220221     | 7.44 | proximal promoter |
| AT3G11820 | SYNTAXIN OF PLANTS 121 (SYP121)                                | Encodes a synt_3_3731068      | 7.44 | five_prime_UTR    |
| AT2G40140 | (CZF1)                                                         | CZF1; CONTAIL_2_16776499      | 7.43 | intergenic        |
| AT2G40160 | (TBL30)                                                        | Encodes a merr_2_16776499     | 7.43 | proximal promoter |
| AT1G48410 | ARGONAUTE 1 (AGO1)                                             | Encodes an RN_1_17892644      | 7.43 | promoter          |
| AT1G20620 | CATALASE 3 (CAT3)                                              | Catalase, cataly_1_7141532    | 7.43 | proximal promoter |
| AT5G55670 | na                                                             | RNA-binding (R_5_22547176     | 7.43 | promoter          |
| AT1G64385 | na                                                             | unknown proteir_1_23902989    | 7.43 | intergenic        |
| AT5G50840 | na                                                             | CONTAINS Inte_5_20685607      | 7.43 | promoter          |
| AT1G19400 | na                                                             | Erythronate-4-p_1_6712698     | 7.43 | intron            |
| AT5G40460 | na                                                             | unknown proteir_5_16202019    | 7.43 | promoter          |
| AT1G14370 | PROTEIN KINASE 2A (APK2A)                                      | Encodes proteir_1_4915495     | 7.43 | promoter          |
| AT2G40150 | TRICHOME BIREFRINGENCE-LIKE 28 (TBL28)                         | Encodes a merr_2_16776499     | 7.43 | intron            |
| AT2G46330 | ARABINOGALACTAN PROTEIN 16 (AGP16)                             | Encodes arabin_2_19020029     | 7.42 | proximal promoter |
| AT1G13080 | CYTOCHROME P450, FAMILY 71, SUBFAMILY 4 (CYP71A4)              | cytochrome P4f_1_4459049      | 7.42 | promoter          |
| AT3G26932 | DSRNA-BINDING PROTEIN 3 (DRB3)                                 | dsRNA-binding_3_9932489       | 7.42 | promoter          |
| AT1G14840 | MICROTUBULE-ASSOCIATED PROTEIN 1 (MAP1)                        | Encodes a micr_1_5115683      | 7.42 | promoter          |
| AT3G54000 | na                                                             | CONTAINS Inte_3_19996405      | 7.42 | promoter          |
| AT5G38130 | na                                                             | HXXXD-type ac_5_15217318      | 7.42 | intergenic        |
| AT3G26935 | na                                                             | DHHC-type zinc_3_9932489      | 7.42 | downstream        |
| AT4G38550 | na                                                             | Arabidopsis phc_4_18025461    | 7.42 | promoter          |
| AT4G38552 | na                                                             | Potential natura_4_18025461   | 7.42 | downstream        |
| AT5G60680 | na                                                             | Protein of unknt_5_24390578   | 7.42 | intergenic        |
| AT4G13395 | ROTUNDIFOLIA LIKE 12 (RTFL12)                                  | ROTUNDIFOLI_4_7786081         | 7.42 | five_prime_UTR    |
| AT2G26660 | SPX DOMAIN GENE 2 (SPX2)                                       | SPX domain ge_2_11338604      | 7.42 | promoter          |
| AT4G31390 | ABC1-LIKE KINASE RELATED TO CHLOROPLAST                        | Protein kinase s_4_15231426   | 7.41 | proximal promoter |
| AT5G22040 | na                                                             | unknown proteir_5_7299260     | 7.41 | promoter          |
| AT4G03110 | RNA-BINDING PROTEIN-DEFENSE RELATED                            | Encodes a puta_4_1379582      | 7.41 | promoter          |
| AT5G38740 | AGAMOUS-LIKE 77 (AGL77)                                        | AGAMOUS-like_5_15515026       | 7.4  | proximal promoter |
| AT4G30510 | HOMOLOG OF YEAST AUTOPHAGY 18 (HAP18)                          | homolog of yeas_4_14907785    | 7.4  | promoter          |
| AT2G36320 | na                                                             | A20/AN1-like zii_2_15228805   | 7.4  | five_prime_UTR    |
| AT4G37240 | na                                                             | unknown proteir_4_17524375    | 7.4  | promoter          |
| AT2G36310 | URIDINE-RIBOHYDROLASE 1 (URH1)                                 | Encodes a cyto_2_15228805     | 7.4  | proximal promoter |
| AT1G80840 | WRKY DNA-BINDING PROTEIN 40 (WRKY40)                           | Pathogen-induc_1_30383579     | 7.4  | promoter          |
| AT5G66360 | ADENOSINE DIMETHYL TRANSFERASE                                 | Encodes a mito_5_26510044     | 7.39 | promoter          |
| AT5G09440 | EXORDIUM LIKE 4 (EXL4)                                         | EXORDIUM like_5_2935829       | 7.39 | proximal promoter |
| AT4G34740 | GLN PHOSPHORIBOSYL PYROPHOSPHATASE                             | Encodes glutarr_4_16576831    | 7.39 | promoter          |
| AT2G34430 | LIGHT-HARVESTING CHLOROPHYLL PROTEIN 2 (LHC2)                  | Photosystem II l_2_14524596   | 7.39 | promoter          |
| AT3G19530 | na                                                             | BEST Arabidop_3_6777362       | 7.39 | proximal promoter |
| AT1G32190 | na                                                             | alpha/beta-Hydr_1_11598503    | 7.39 | proximal promoter |
| AT3G58600 | na                                                             | Adaptin ear-bin_3_21671316    | 7.39 | promoter          |
| AT3G58610 | na                                                             | ketol-acid reduc_3_21671316   | 7.39 | promoter          |
| AT3G60670 | na                                                             | PLATZ transcrip_3_22427870    | 7.39 | proximal promoter |
| AT4G34750 | na                                                             | SAUR-like auxir_4_16576831    | 7.39 | proximal promoter |
| AT4G00720 | SHAGGY-LIKE PROTEIN KINASE 32 (SKP32)                          | Encodes ASKth_4_297361        | 7.39 | promoter          |
| AT5G66880 | SUCROSE NONFERMENTING 1 (SNF1)                                 | encodes a mem_5_26709997      | 7.39 | proximal promoter |
| AT1G20900 | ESCAROLA (ESC)                                                 | Encodes an AT_1_7270589       | 7.38 | proximal promoter |
| AT5G56980 | na                                                             | unknown proteir_5_23059514    | 7.38 | proximal promoter |
| AT1G58602 | na                                                             | LRR and NB-AF_1_21746190      | 7.38 | promoter          |
| AT1G76420 | CUP SHAPED COTYLEDON3 (CUC3)                                   | Identified in an e_1_28677348 | 7.37 | intergenic        |
| AT5G07240 | IQ-DOMAIN 24 (IQD24)                                           | IQ-domain 24 (l_5_2272614     | 7.37 | intron            |
| AT2G22241 | na                                                             | unknown proteir_2_9454340     | 7.37 | exon              |
| AT2G03690 | na                                                             | Ubiquinone bios_2_1123212     | 7.37 | promoter          |
| AT2G03700 | na                                                             | pre-tRNA; tRNA_2_1123212      | 7.37 | downstream        |
| AT1G07040 | na                                                             | unknown proteir_1_2164109     | 7.37 | proximal promoter |
| AT1G07050 | na                                                             | CCT motif famih_1_2164109     | 7.37 | downstream        |
| AT1G54820 | na                                                             | Protein kinase s_1_20448123   | 7.37 | intron            |
| AT1G55690 | na                                                             | Sec14p-like phc_1_20815239    | 7.37 | proximal promoter |
| AT3G50651 | na                                                             | unknown proteir_3_18809903    | 7.37 | intergenic        |
| AT1G15100 | RING-H2 FINGER A2A (RHA2A)                                     | Encodes a puta_1_5195951      | 7.37 | proximal promoter |
| AT5G63880 | (VPS20.1)                                                      | VPS20.1; CON_5_25563423       | 7.36 | promoter          |
| AT5G55910 | D6 PROTEIN KINASE (D6PK)                                       | D6PK is a prote_5_22645041    | 7.36 | proximal promoter |
| AT4G21740 | na                                                             | unknown proteir_4_11545852    | 7.36 | promoter          |
| AT3G08020 | na                                                             | PHD finger fami_3_2562919     | 7.36 | proximal promoter |
| AT2G22241 | na                                                             | unknown proteir_2_9456877     | 7.36 | intergenic        |
| AT5G55920 | OLIGOCELLULA 2 (OLI2)                                          | Encodes a hom_5_22645041      | 7.36 | intergenic        |

|           |                                      |                               |      |                   |
|-----------|--------------------------------------|-------------------------------|------|-------------------|
| AT1G16880 | ACT DOMAIN REPEATS 11 (ACR11)        | Encodes a ACT 1_5773425       | 7.35 | promoter          |
| AT1G15010 | na                                   | unknown protein 1_5171074     | 7.35 | promoter          |
| AT1G16870 | na                                   | mitochondrial 2t 1_5773425    | 7.35 | promoter          |
| AT1G17830 | na                                   | Protein of unkn 1_6137540     | 7.35 | intron            |
| AT4G39070 | na                                   | B-box zinc finger 4_18208871  | 7.35 | proximal promoter |
| AT5G63860 | UVB-RESISTANCE 8 (UVR8)              | UV-B-specific si 5_25558795   | 7.35 | five_prime_UTR    |
| AT4G39080 | VACUOLAR PROTON ATPASE A3 (VHA-      | Vacuolar proton 4_18208871    | 7.35 | proximal promoter |
| AT2G03360 | na                                   | Glycosyltransferase 2_1025845 | 7.34 | proximal promoter |
| AT2G03370 | na                                   | Glycosyltransferase 2_1025845 | 7.34 | exon              |
| AT5G65740 | na                                   | zinc ion binding; 5_26301436  | 7.34 | downstream        |
| AT5G65720 | NITROGEN FIXATION S (NIFS)-LIKE 1 (N | Encodes a cyst 5_26301436     | 7.34 | intergenic        |
| AT1G79590 | SYNTAXIN OF PLANTS 52 (SYP52)        | Encodes one of 1_29949335     | 7.34 | intergenic        |
| AT2G41630 | TRANSCRIPTION FACTOR IIB (TFIIB)     | Encodes the tra 2_17357789    | 7.34 | promoter          |
| AT5G65730 | XYLOGLUCAN ENDOTRANGLUCOSYL          | xyloglucan endc 5_26301436    | 7.34 | intergenic        |
| AT2G41660 | MIZU-KUSSEI 1 (MIZ1)                 | Essential for hy 2_17369568   | 7.33 | intergenic        |
| AT3G19390 | na                                   | Granulin repeat 3_6720056     | 7.33 | proximal promoter |
| AT1G16750 | na                                   | Protein of unkn 1_5731898     | 7.33 | promoter          |
| AT2G17556 | na                                   | unknown protein 2_7641368     | 7.33 | proximal promoter |
| AT4G19460 | na                                   | UDP-Glycosyltr: 4_10612238    | 7.33 | promoter          |
| AT1G72750 | TRANSLOCASE INNER MEMBRANE SUF       | translocase inn 1_27383329    | 7.33 | promoter          |
| AT3G09260 | (PYK10)                              | Encodes beta-g 3_2844685      | 7.32 | proximal promoter |
| AT1G02510 | (TPK4)                               | Encodes AITPK 1_522024        | 7.32 | promoter          |
| AT5G01520 | ABA INSENSITIVE RING PROTEIN 2 (AIR  | RING/U-box su 5_206244        | 7.32 | promoter          |
| AT4G23750 | CYTOKININ RESPONSE FACTOR 2 (CRF     | encodes a mem 4_12373182      | 7.32 | intergenic        |
| AT4G08980 | F-BOX WITH WD-40 2 (FBW2)            | Encodes an F-b 4_5757896      | 7.32 | promoter          |
| AT5G67200 | na                                   | Leucine-rich rep 5_26817182   | 7.32 | proximal promoter |
| AT1G22320 | na                                   | pre-tRNA; tRNA 1_7884334      | 7.32 | downstream        |
| AT2G37030 | na                                   | SAUR-like auxin 2_15552671    | 7.32 | proximal promoter |
| AT1G67340 | na                                   | HCP-like super 1_25230157     | 7.32 | promoter          |
| AT5G67630 | na                                   | P-loop containir 5_26969671   | 7.32 | promoter          |
| AT5G67640 | na                                   | unknown protein 5_26969671    | 7.32 | intron            |
| AT2G37025 | TRF-LIKE 8 (TRFL8)                   | TRF-like 8 (TRF 2_15552671    | 7.32 | intergenic        |
| AT5G25460 | DUF642 L-GALL RESPONSIVE GENE 2      | Protein of unkn 5_8864175     | 7.31 | intron            |
| AT2G29670 | na                                   | Tetratricopeptid 2_12682594   | 7.31 | intron            |
| AT2G18860 | na                                   | Syntaxin/t-SNAI 2_8164121     | 7.31 | promoter          |
| AT5G54148 | na                                   | unknown protein 5_21975208    | 7.31 | intergenic        |
| AT3G50080 | VIER F-BOX PROTEINE 2 (VFB2)         | Encodes an F-b 3_18572662     | 7.31 | promoter          |
| AT1G49620 | (ICK5)                               | Kip-related prot 1_18366789   | 7.3  | promoter          |
| AT5G03210 | DBP-INTERACTING PROTEIN 2 (DIP2)     | Encodes a sma 5_763540        | 7.3  | promoter          |
| AT5G22890 | na                                   | C2H2 and C2H 5_7655642        | 7.3  | proximal promoter |
| AT3G16400 | NITRILE SPECIFIER PROTEIN 1 (NSP1)   | Encodes a nitril 3_5568678    | 7.3  | downstream        |
| AT1G21100 | INDOLE GLUCOSINOLATE O-METHYL        | O-methyltransfe 1_7388715     | 7.29 | promoter          |
| AT2G29679 | na                                   | unknown protein 2_12688756    | 7.29 | intergenic        |
| AT4G33565 | na                                   | RING/U-box su 4_16136409      | 7.29 | promoter          |
| AT5G01420 | na                                   | Glutaredoxin fa 5_176387      | 7.29 | promoter          |
| AT5G01430 | na                                   | Gott1/Sft2-like v 5_176387    | 7.29 | downstream        |
| AT1G29150 | NON-ATPASE SUBUNIT 9 (ATS9)          | specifically inter 1_10180403 | 7.29 | promoter          |
| AT5G47110 | (LIL32)                              | Chlorophyll A-B 5_19135912    | 7.28 | proximal promoter |
| AT5G47120 | BAX INHIBITOR 1 (BI1)                | Encodes BI-1, a 5_19135912    | 7.28 | promoter          |
| AT5G51990 | C-REPEAT-BINDING FACTOR 4 (CBF4)     | encodes a mem 5_21118239      | 7.28 | promoter          |
| AT3G60680 | na                                   | Plant protein of 3_22432300   | 7.28 | intergenic        |
| AT1G26160 | na                                   | Metal-depender 1_9043980      | 7.28 | intergenic        |
| AT1G77200 | na                                   | encodes a mem 1_29006374      | 7.28 | proximal promoter |
| AT4G13530 | na                                   | unknown protein 4_7869491     | 7.28 | intergenic        |
| AT4G13540 | na                                   | unknown protein 4_7869491     | 7.28 | promoter          |
| AT5G67290 | na                                   | FAD-dependent 5_26849951      | 7.28 | promoter          |
| AT1G26150 | PROLINE-RICH EXTENSIN-LIKE RECEPTOR  | Encodes a mem 1_9043980       | 7.28 | proximal promoter |
| AT2G40090 | ABC2 HOMOLOG 9 (ATH9)                | member of ATH 2_16741099      | 7.27 | proximal promoter |
| AT1G01600 | CYTOCHROME P450, FAMILY 86, SUBF     | Encodes a mem 1_218809        | 7.27 | promoter          |
| AT1G01610 | GLYCEROL-3-PHOSPHATE ACYLTRANSFERASE | Encodes a prot 1_218809       | 7.27 | intergenic        |
| AT5G44190 | GOLDEN2-LIKE 2 (GLK2)                | Encodes GLK2, 5_17792821      | 7.27 | intergenic        |
| AT5G03220 | na                                   | Mediator compl 5_767094       | 7.27 | intergenic        |
| AT2G44500 | na                                   | O-fucosyltransf 2_18374285    | 7.27 | promoter          |
| AT3G03680 | na                                   | C2 calcium/lipid 3_910890     | 7.27 | downstream        |
| AT3G47341 | na                                   | unknown protein 3_17442318    | 7.27 | intergenic        |
| AT5G46250 | na                                   | RNA-binding pri 5_18753977    | 7.27 | proximal promoter |
| AT4G00570 | NAD-DEPENDENT MALIC ENZYME 2 (NAD    | Encodes an NA 4_246932        | 7.27 | promoter          |
| AT3G55000 | TONNEAU 1A (TON1A)                   | Encodes a prot 3_20378990     | 7.27 | proximal promoter |
| AT3G03690 | UNFERTILIZED EMBRYO SAC 7 (UNE7)     | unfertilized emb 3_910890     | 7.27 | intergenic        |
| AT2G02800 | PROTEIN KINASE 2B (APK2B)            | Encodes protein 2_799575      | 7.26 | promoter          |
| AT2G43510 | TRYPSIN INHIBITOR PROTEIN 1 (TI1)    | Member of the c 2_18067684    | 7.26 | three_prime_UTR   |
| AT3G16520 | UDP-GLUCOSYL TRANSFERASE 88A1 (UGT   | UDP-glucosyl tr 3_5620920     | 7.26 | promoter          |
| AT5G53050 | na                                   | alpha/beta-Hydr 5_21513651    | 7.25 | promoter          |
| AT1G61100 | na                                   | disease resistar 1_22512326   | 7.25 | intron            |
| AT1G70900 | na                                   | unknown protein 1_26731648    | 7.25 | promoter          |
| AT5G52510 | SCARECROW-LIKE 8 (SCL8)              | SCARECROW- 5_21306849         | 7.25 | promoter          |
| AT1G01650 | SIGNAL PEPTIDE PEPTIDASE-LIKE 4 (SI  | SIGNAL PEPTII 1_237912        | 7.25 | promoter          |
| AT4G18170 | WRKY DNA-BINDING PROTEIN 28 (WRK     | member of WR 4_10060447       | 7.25 | proximal promoter |
| AT1G07090 | LIGHT SENSITIVE HYPOCOTYLS 6 (LSH    | LIGHT SENSITI 1_2175059       | 7.24 | promoter          |
| AT1G12380 | na                                   | unknown protein 1_4217253     | 7.24 | promoter          |
| AT2G34480 | na                                   | Ribosomal prote 2_14534747    | 7.24 | proximal promoter |
| AT2G46380 | na                                   | Protein of unkn 2_19038932    | 7.24 | promoter          |
| AT3G57880 | na                                   | Calcium-depend 3_21434962     | 7.24 | promoter          |
| AT5G22920 | na                                   | CHY-type/CTC 5_7667533        | 7.24 | intergenic        |
| AT5G24430 | na                                   | Calcium-depend 5_8344020      | 7.24 | proximal promoter |
| AT5G42000 | na                                   | ORMDL family 5_16799217       | 7.24 | promoter          |
| AT3G05740 | RECQ HELICASE L1 (RECQ1)             | RECQ helicase 3_1697854       | 7.24 | promoter          |
| AT5G64810 | WRKY DNA-BINDING PROTEIN 51 (WRK     | member of WR 5_25908050       | 7.24 | promoter          |
| AT5G43890 | YUCCA5 (YUC5)                        | Encodes a YUC 5_17655989      | 7.24 | intergenic        |
| AT1G75660 | 5'-3' EXORIBONUCLEASE 3 (XRN3)       | Encodes a prot 1_28407949     | 7.23 | promoter          |
| AT2G39570 | ACT DOMAIN REPEATS 9 (ACR9)          | Encodes a ACT 2_16507703      | 7.23 | promoter          |
| AT3G25110 | FATA ACYL-ACP THIOESTERASE (FaTA     | Encodes a FatA 3_9148490      | 7.23 | promoter          |
| AT3G04210 | na                                   | Disease resista 3_1108278     | 7.23 | promoter          |
| AT5G41130 | na                                   | Esterase/lipase 5_16464971    | 7.23 | proximal promoter |

|           |                                     |                   |              |      |                   |
|-----------|-------------------------------------|-------------------|--------------|------|-------------------|
| AT5G51830 | na                                  | pfkB-like carbof  | 5_21071829   | 7.23 | downstream        |
| AT5G51840 | na                                  | unknown proteir   | 5_21071829   | 7.23 | promoter          |
| AT1G75650 | na                                  | pre-tRNA; tRNA    | 1_28407949   | 7.23 | promoter          |
| AT1G75640 | na                                  | Leucine-rich rec  | 1_28407949   | 7.23 | proximal promoter |
| AT3G17020 | na                                  | Adenine nucleoi   | 3_5804344    | 7.23 | promoter          |
| AT3G17030 | na                                  | Nucleic acid-bin  | 3_5804344    | 7.23 | downstream        |
| AT1G72150 | PATELLIN 1 (PATL1)                  | novel cell-plate- | 1_27148445   | 7.23 | promoter          |
| AT3G29360 | UDP-GLUCOSE DEHYDROGENASE 2 (L      | Encodes one of    | 3_11269396   | 7.23 | promoter          |
| AT5G57490 | VOLTAGE DEPENDENT ANION CHANNE      | Encodes a voltz   | 5_23285980   | 7.23 | promoter          |
| AT3G52840 | BETA-GALACTOSIDASE 2 (BGAL2)        | beta-galactosid;  | 3_19581081   | 7.22 | promoter          |
| AT4G34990 | MYB DOMAIN PROTEIN 32 (MYB32)       | Member of the f   | 4_16663613   | 7.22 | proximal promoter |
| AT3G42570 | na                                  | peroxidase fami   | 3_14690027   | 7.22 | exon              |
| AT3G42580 | na                                  | transposable elk  | 3_14690027   | 7.22 | proximal promoter |
| AT5G58650 | PLANT PEPTIDE CONTAINING SULFATE    | Encodes PSY1,     | 5_23700481   | 7.21 | promoter          |
| AT2G47650 | UDP-XYLOSE SYNTHASE 4 (UXS4)        | encodes a prote   | 2_19540310   | 7.21 | intron            |
| AT1G63130 | na                                  | Transactinq siR   | 1_23412379   | 7.2  | promoter          |
| AT3G62470 | na                                  | Pentatricopeptic  | 3_23108676   | 7.2  | promoter          |
| AT5G49370 | na                                  | Pleckstrin homc   | 5_20020667   | 7.2  | proximal promoter |
| AT4G35780 | SERINE/THREONINE/TYROSINE KINASE    | ACT-like proteir  | 4_16950685   | 7.2  | promoter          |
| AT2G25490 | EIN3-BINDING F BOX PROTEIN 1 (EBF1  | Encodes an F-b    | 2_10850604   | 7.19 | promoter          |
| AT1G53170 | ETHYLENE RESPONSE FACTOR 8 (ERF)    | encodes a mem     | 1_19820305   | 7.19 | intergenic        |
| AT1G69530 | EXPANSIN A1 (EXPA1)                 | Member of Alph    | 1_26140851   | 7.19 | proximal promoter |
| AT5G13190 | GSH-INDUCED LITAF DOMAIN PROTEIN    | Encodes a plasi   | 5_4203546    | 7.19 | intergenic        |
| AT4G29090 | na                                  | Ribonuclease H    | 4_14331487   | 7.19 | proximal promoter |
| AT1G15370 | na                                  | SNARE-like sup    | 1_5286841    | 7.19 | promoter          |
| AT1G30475 | na                                  | BEST Arabidop;    | 1_10795279   | 7.19 | intergenic        |
| AT3G15520 | na                                  | Cyclophilin-like  | 3_5252843    | 7.19 | promoter          |
| AT3G15530 | na                                  | S-adenosyl-L-m    | 3_5252843    | 7.19 | downstream        |
| AT4G29030 | na                                  | Putative membr    | 4_14308514   | 7.19 | intergenic        |
| AT3G45780 | PHOTOTROPIN 1 (PHOT1)               | Blue-light photo  | 3_16819947   | 7.19 | exon              |
| AT2G39480 | ATP-BINDING CASSETTE B6 (ABCB6)     | P-glycoprotein    | 6_2_16485752 | 7.18 | proximal promoter |
| AT3G26180 | CYTOCHROME P450, FAMILY 71, SUBF    | putative cytochr  | 3_9577752    | 7.18 | intergenic        |
| AT3G18950 | na                                  | Transducin/WD     | 3_6538399    | 7.18 | three_prime_UTR   |
| AT5G54700 | na                                  | Ankyrin repeat    | f_5_22226556 | 7.18 | proximal promoter |
| AT3G55110 | ATP-BINDING CASSETTE G18 (ABCG18    | ABC-2 type tran   | 3_20428560   | 7.17 | proximal promoter |
| AT1G73830 | BR ENHANCED EXPRESSION 3 (BEE3)     | BR enhanced e;    | 1_27759780   | 7.17 | promoter          |
| AT5G64860 | DISPROPORTIONATING ENZYME (DPE      | Encodes a malt    | 5_25929318   | 7.17 | promoter          |
| AT5G43750 | PHOTOSYNTHETIC NDH SUBCOMPLE        | NAD(P)H dehy      | 5_17581801   | 7.17 | proximal promoter |
| AT5G61810 | ATP/PHOSPHATE CARRIER 1 (APC1)      | Encodes a mito    | 5_24834001   | 7.16 | promoter          |
| AT1G12820 | AUXIN SIGNALING F-BOX 3 (AFB3)      | Auxin receptor    | i_1_4371445  | 7.16 | promoter          |
| AT2G17840 | EARLY-RESPONSIVE TO DEHYDRATIO      | Identified as drc | 2_7757913    | 7.16 | promoter          |
| AT2G18735 | na                                  | other RNA         | 2_8122970    | 7.16 | exon              |
| AT2G18740 | na                                  | Small nuclear ril | 2_8122970    | 7.16 | promoter          |
| AT2G17830 | na                                  | F-box and asso    | 2_7757913    | 7.16 | intergenic        |
| AT1G25260 | na                                  | Ribosomal prote   | 1_8853826    | 7.16 | downstream        |
| AT4G08910 | na                                  | unknown proteir   | 4_5712228    | 7.16 | promoter          |
| AT5G24570 | na                                  | unknown proteir   | 5_8405209    | 7.16 | intergenic        |
| AT5G61820 | na                                  | FUNCTIONS IN      | 5_24834001   | 7.16 | intergenic        |
| AT5G02940 | na                                  | Protein of unkn   | 5_690071     | 7.16 | promoter          |
| AT5G05180 | na                                  | unknown proteir   | 5_1535995    | 7.16 | promoter          |
| AT1G14740 | TITANIA 1 (TTA1)                    | Encodes a PHC     | 1_5077859    | 7.16 | promoter          |
| AT2G44910 | HOMEBOX-LEUCINE ZIPPER PROTEIN      | Encodes a hom     | 2_18521608   | 7.15 | proximal promoter |
| AT5G37490 | na                                  | ARM repeat sup    | 5_14888196   | 7.15 | exon              |
| AT3G58120 | (BZIP61)                            | Encodes a merr    | 3_21520340   | 7.14 | intergenic        |
| AT1G55360 | na                                  | Protein of Unkn   | 1_20670048   | 7.14 | proximal promoter |
| AT2G45850 | na                                  | AT hook motif     | D2_18873964  | 7.14 | five_prime_UTR    |
| AT2G32190 | na                                  | unknown proteir   | 2_13676278   | 7.14 | intergenic        |
| AT2G32200 | na                                  | unknown proteir   | 2_13676278   | 7.14 | promoter          |
| AT5G67190 | DREB AND EAR MOTIF PROTEIN 2 (DE    | encodes a mem     | 5_26808389   | 7.13 | intergenic        |
| AT3G24140 | FAMA (FMA)                          | Encodes a basi    | 3_8719251    | 7.13 | proximal promoter |
| AT3G11405 | na                                  | unknown proteir   | 3_3582899    | 7.13 | intergenic        |
| AT1G15970 | na                                  | DNA glycosylas    | 1_5489040    | 7.13 | promoter          |
| AT1G15980 | PHOTOSYNTHETIC NDH SUBCOMPLE        | encodes a nove    | 1_5489040    | 7.13 | promoter          |
| AT3G18485 | IAA-LEUCINE RESISTANT 2 (ILR2)      | Encodes a nove    | 3_6344437    | 7.12 | proximal promoter |
| AT2G17120 | LYSM DOMAIN GPI-ANCHORED PROTE      | Induction of chit | 2_7459093    | 7.12 | five_prime_UTR    |
| AT3G20360 | na                                  | TRAF-like family  | 3_7102414    | 7.12 | proximal promoter |
| AT4G29780 | na                                  | unknown proteir   | 4_14579627   | 7.12 | promoter          |
| AT4G29790 | na                                  | unknown proteir   | 4_14579627   | 7.12 | intergenic        |
| AT5G03230 | na                                  | Protein of unkn   | 5_769369     | 7.12 | promoter          |
| AT4G18910 | NOD26-LIKE INTRINSIC PROTEIN 1;2 (N | Encodes an aq     | 4_10365555   | 7.12 | proximal promoter |
| AT1G30810 | JUMONJI DOMAIN-CONTAINING PROTE     | JMJ18 encodes     | 1_10942424   | 7.11 | promoter          |
| AT5G03140 | na                                  | Concanavalin A    | 5_740114     | 7.11 | promoter          |
| AT3G02125 | na                                  | unknown proteir   | 3_380012     | 7.11 | intergenic        |
| AT3G02130 | RECEPTOR-LIKE PROTEIN KINASE 2 (R   | Encodes a rece    | 3_380012     | 7.11 | proximal promoter |
| AT5G55910 | D6 PROTEIN KINASE (D6PK)            | D6PK is a prote   | 5_22642258   | 7.1  | five_prime_UTR    |
| AT1G17455 | ELF4-LIKE 4 (ELF4-L4)               | ELF4-like 4 (EL   | 1_5997072    | 7.1  | promoter          |
| AT5G57070 | na                                  | hydroxyproline-   | 5_23098374   | 7.1  | three_prime_UTR   |
| AT5G57080 | na                                  | unknown proteir   | 5_23098374   | 7.1  | proximal promoter |
| AT4G37680 | HEPTAHELICAL PROTEIN 4 (HHP4)       | heptahelical trar | 4_17699259   | 7.09 | proximal promoter |
| AT4G37670 | N-ACETYL-L-GLUTAMATE SYNTHASE 2     | N-acetyl-l-glutar | 4_17699259   | 7.09 | promoter          |
| AT3G61670 | na                                  | Protein of unkn   | 3_22817871   | 7.09 | proximal promoter |
| AT1G68490 | na                                  | unknown proteir   | 1_25690158   | 7.09 | intergenic        |
| AT5G40660 | na                                  | ATP12 protein-r   | 5_16285770   | 7.09 | promoter          |
| AT5G40670 | na                                  | PQ-loop repeat    | 5_16285770   | 7.09 | five_prime_UTR    |
| AT4G09570 | CALCIUM-DEPENDENT PROTEIN KINASE    | Encodes a merr    | 4_6049428    | 7.08 | promoter          |
| AT1G67790 | na                                  | unknown proteir   | 1_25417594   | 7.08 | exon              |
| AT1G67792 | na                                  | Potential natura  | 1_25417594   | 7.08 | promoter          |
| AT1G65295 | na                                  | unknown proteir   | 1_24253036   | 7.08 | intergenic        |
| AT1G29340 | PLANT U-BOX 17 (PUB17)              | Encodes a prote   | 1_10264026   | 7.08 | promoter          |
| AT5G13700 | POLYAMINE OXIDASE 1 (PAO1)          | Encodes a prote   | 5_4423818    | 7.08 | proximal promoter |
| AT5G13710 | STEROL METHYLTRANSFERASE 1 (SM      | SMT1 controls     | t_5_4423818  | 7.08 | three_prime_UTR   |
| AT4G04955 | ALLANTOINASE (ALN)                  | Encodes an alla   | 4_2525460    | 7.07 | promoter          |
| AT3G05800 | ATBS1(ACTIVATION-TAGGED BRI1 SUP    | AtBS1(activatio   | 3_1729866    | 7.07 | intergenic        |
| AT5G18570 | EMBRYO DEFECTIVE 269 (EMB269)       | Encodes AtObq     | 5_6170493    | 7.07 | intergenic        |

|           |                                    |                   |             |      |                   |
|-----------|------------------------------------|-------------------|-------------|------|-------------------|
| AT1G62870 | na                                 | unknown protei    | 1_23286936  | 7.07 | promoter          |
| AT1G15290 | na                                 | Tetratricopeptid  | 1_5265149   | 7.07 | promoter          |
| AT3G12835 | na                                 | unknown protei    | 3_4084077   | 7.07 | proximal promoter |
| AT3G05810 | na                                 | FUNCTIONS IN      | 3_1729866   | 7.07 | intergenic        |
| AT3G22840 | EARLY LIGHT-INDUCABLE PROTEIN (EL  | Encodes an ear    | 3_8086292   | 7.06 | proximal promoter |
| AT2G46662 | na                                 | unknown protei    | 2_19158245  | 7.06 | promoter          |
| AT3G44380 | na                                 | Late embryoger    | 3_16037002  | 7.06 | promoter          |
| AT3G24480 | na                                 | Leucine-rich ref  | 3_8902722   | 7.06 | promoter          |
| AT3G57040 | RESPONSE REGULATOR 9 (ARR9)        | response regul    | 3_21108849  | 7.06 | proximal promoter |
| AT1G07140 | (SIRANBP)                          | Encodes a puta    | 1_2196844   | 7.05 | intergenic        |
| AT1G07150 | MITOGEN-ACTIVATED PROTEIN KINASE   | member of MEK     | 1_2196844   | 7.05 | proximal promoter |
| AT1G78895 | na                                 | Reticulon family  | 1_29660081  | 7.05 | promoter          |
| AT2G32760 | na                                 | unknown protei    | 2_13891709  | 7.05 | promoter          |
| AT2G18721 | na                                 | unknown protei    | 2_8117919   | 7.05 | intergenic        |
| AT1G66345 | na                                 | Pentatricopeptic  | 1_24740484  | 7.05 | intergenic        |
| AT2G12462 | na                                 | BEST Arabidop     | 2_5052961   | 7.05 | proximal promoter |
| AT3G60318 | na                                 | This gene encod   | 3_22291550  | 7.05 | promoter          |
| AT3G60320 | na                                 | Protein of unkn   | 3_22291550  | 7.05 | intergenic        |
| AT5G24210 | na                                 | alpha/beta-Hydr   | 5_8220631   | 7.05 | intergenic        |
| AT5G20740 | na                                 | Plant invertase/  | 5_7026655   | 7.05 | promoter          |
| AT5G43310 | na                                 | COP1-interactir   | 5_17385620  | 7.05 | promoter          |
| AT2G23000 | SERINE CARBOXYPEPTIDASE-LIKE 10 (  | serine carboxyp   | 2_9790498   | 7.05 | proximal promoter |
| AT2G22990 | SINAPOYLGLUCOSE 1 (SNG1)           | sinapoylglucose   | 2_9790498   | 7.05 | intergenic        |
| AT1G76500 | SUPPRESSOR OF PHYB-4#3 (SOB3)      | Encodes an AT     | 1_28701717  | 7.05 | intergenic        |
| AT1G78900 | VACUOLAR ATP SYNTHASE SUBUNIT A    | Encodes cataly    | 1_29660081  | 7.05 | promoter          |
| AT1G74950 | (TIFY10B)                          | TIFY10B; CON1     | 1_28147830  | 7.04 | intergenic        |
| AT4G34610 | BEL1-LIKE HOMEODOMAIN 6 (BLH6)     | BEL1-like home    | 4_16534192  | 7.04 | proximal promoter |
| AT1G74940 | na                                 | Protein of unkn   | 1_28147830  | 7.04 | intergenic        |
| AT3G52990 | na                                 | Pyruvate kinase   | 3_19647725  | 7.04 | proximal promoter |
| AT4G34620 | SMALL SUBUNIT RIBOSOMAL PROTEIN    | Encodes riboso    | 4_16534192  | 7.04 | intergenic        |
| AT1G62380 | ACC OXIDASE 2 (ACO2)               | Encodes a prot    | 1_23082135  | 7.03 | promoter          |
| AT1G19870 | IQ-DOMAIN 32 (iqd32)               | IQ-domain 32 (i   | i_1_6898761 | 7.03 | promoter          |
| AT4G38620 | MYB DOMAIN PROTEIN 4 (MYB4)        | Encodes a R2R     | 4_18053588  | 7.03 | five_prime_UTR    |
| AT1G66880 | na                                 | Protein kinase s  | 1_24952384  | 7.03 | intron            |
| AT1G66890 | na                                 | FUNCTIONS IN      | 1_24952384  | 7.03 | intergenic        |
| AT5G67360 | (ARA12)                            | Encodes a subt    | 5_26876665  | 7.02 | proximal promoter |
| AT3G08760 | (ATSIK)                            | Encodes an osr    | 3_2660912   | 7.02 | promoter          |
| AT1G79370 | CYTOCHROME P450, FAMILY 79, SUBF   | member of CYP     | 1_29860644  | 7.02 | intergenic        |
| AT4G04850 | K+ EFFLUX ANTIPORTER 3 (KEA3)      | member of Puta    | 4_2452642   | 7.02 | promoter          |
| AT1G21835 | na                                 | Encodes a Plan    | 1_7664170   | 7.02 | proximal promoter |
| AT2G26720 | na                                 | Cupredoxin sup    | 2_11382686  | 7.02 | proximal promoter |
| AT5G67370 | na                                 | Protein of unkn   | 5_26876665  | 7.02 | intergenic        |
| AT1G77500 | na                                 | Protein of unkn   | 1_29121298  | 7.02 | promoter          |
| AT5G14210 | na                                 | Leucine-rich ref  | 5_4581745   | 7.02 | promoter          |
| AT2G26710 | PHYB ACTIVATION TAGGED SUPPRESS    | Encodes a merr    | 2_11382686  | 7.02 | exon              |
| AT1G79380 | RING DOMAIN LIGASE 4 (RGL4)        | Encodes a ubiq    | 1_29860644  | 7.02 | five_prime_UTR    |
| AT1G20850 | XYLEM CYSTEINE PEPTIDASE 2 (XCP2)  | xylem cysteine    | 1_1_7250810 | 7.02 | proximal promoter |
| AT3G14010 | CTC-INTERACTING DOMAIN 4 (CID4)    | hydroxyproline-i  | 3_4641864   | 7.01 | intergenic        |
| AT5G02230 | na                                 | Haloacid dehalc   | 5_448794    | 7.01 | intron            |
| AT1G28050 | na                                 | B-box type zinc   | 1_9777983   | 7.01 | promoter          |
| AT1G28060 | na                                 | Pre-mRNA-splic    | 1_9777983   | 7.01 | proximal promoter |
| AT1G52000 | na                                 | Mannose-bindin    | 1_19336085  | 7.01 | five_prime_UTR    |
| AT2G26975 | na                                 | Clr copper trans  | 2_11512889  | 7.01 | five_prime_UTR    |
| AT1G70550 | na                                 | Protein of Unkn   | 1_26596456  | 7.01 | proximal promoter |
| AT4G14746 | na                                 | CONTAINS Inte     | 4_8465278   | 7.01 | proximal promoter |
| AT3G14020 | NUCLEAR FACTOR Y, SUBUNIT A6 (NF-  | nuclear factor Y  | 3_4641864   | 7.01 | promoter          |
| AT1G31580 | (ECS1)                             | Encodes cell wa   | 1_11311859  | 7    | three_prime_UTR   |
| AT2G34185 | na                                 | unknown protei    | 2_14436024  | 7    | intron            |
| AT2G34186 | na                                 | unknown protei    | 2_14436024  | 7    | promoter          |
| AT3G04470 | na                                 | Ankyrin repeat    | f_3_1192548 | 7    | five_prime_UTR    |
| AT3G13690 | na                                 | Protein kinase    | f_3_4490391 | 7    | downstream        |
| AT3G13700 | na                                 | RNA-binding (R    | 3_4490391   | 7    | intergenic        |
| AT3G13710 | PRENYLATED RAB ACCEPTOR 1.F4 (PF   | prenylated RAB    | 3_4490391   | 7    | intergenic        |
| AT5G19140 | (AILP1)                            | AILP1; FUNCTI     | 5_6423153   | 6.99 | promoter          |
| AT3G25730 | ETHYLENE RESPONSE DNA BINDING F    | ethylene respor   | 3_9396407   | 6.99 | promoter          |
| AT3G63170 | FATTY-ACID-BINDING PROTEIN 1 (FAP1 | Encodes a plast   | 3_23334425  | 6.99 | five_prime_UTR    |
| AT4G20140 | GASSHO1 (GSO1)                     | Encodes GASS      | 4_10883924  | 6.99 | promoter          |
| AT4G00630 | K+ EFFLUX ANTIPORTER 2 (KEA2)      | Encodes a K(+)    | 4_268217    | 6.99 | promoter          |
| AT3G25740 | METHIONINE AMINOPEPTIDASE 1C (MA   | Encodes a plasi   | 3_9396407   | 6.99 | proximal promoter |
| AT1G76878 | na                                 | Potential natura  | 1_28868548  | 6.99 | proximal promoter |
| AT1G76880 | na                                 | Duplicated hom    | 1_28868548  | 6.99 | intergenic        |
| AT2G45460 | na                                 | SMAD/FHA don      | 2_18741949  | 6.99 | promoter          |
| AT5G19150 | na                                 | pfkB-like carbo   | 5_6423153   | 6.99 | downstream        |
| AT2G28250 | (NCRK)                             | NCRK; CONTA       | 2_12042367  | 6.98 | proximal promoter |
| AT3G24840 | na                                 | Sec14p-like phc   | 3_9066395   | 6.98 | promoter          |
| AT4G24200 | na                                 | Transcription el  | 4_12561036  | 6.98 | promoter          |
| AT4G32620 | na                                 | Enhancer of pol   | 4_15731221  | 6.98 | promoter          |
| AT2G05540 | na                                 | Glycine-rich pro  | 2_2033053   | 6.98 | promoter          |
| AT2G45180 | na                                 | Bifunctional inhi | 2_18626057  | 6.98 | promoter          |
| AT4G32480 | na                                 | Protein of unkn   | 4_15678023  | 6.98 | downstream        |
| AT2G20180 | PHYTOCHROME INTERACTING FACTO      | Encodes a nove    | 2_8706983   | 6.98 | promoter          |
| AT1G27730 | SALT TOLERANCE ZINC FINGER (STZ)   | Related to Cys2   | 1_9649321   | 6.98 | promoter          |
| AT5G52830 | WRKY DNA-BINDING PROTEIN 27 (WRK   | Encodes a WRK     | 5_21409043  | 6.98 | proximal promoter |
| AT1G48280 | na                                 | hydroxyproline-i  | 1_17834881  | 6.97 | promoter          |
| AT2G46610 | ARGININE/SERINE-RICH SPLICING FAC  | Barta et al (201  | 2_19138917  | 6.96 | promoter          |
| AT4G23260 | CYSTEINE-RICH RLK (RECEPTOR-LIKE   | Encodes a cyst    | 4_12167132  | 6.96 | downstream        |
| AT4G23250 | EMBRYO DEFECTIVE 1290 (emb1290)    | EMBRYO DEFE       | 4_12167132  | 6.96 | promoter          |
| AT1G21670 | na                                 | LOCATED IN: c     | 1_7612790   | 6.96 | downstream        |
| AT1G21680 | na                                 | DPP6 N-termin     | 1_7612790   | 6.96 | promoter          |
| AT2G46620 | na                                 | P-loop containir  | 2_19138917  | 6.96 | three_prime_UTR   |
| AT3G49590 | AUTOPHAGY-RELATED 13 (ATG13)       | Autophagy-relat   | 3_18377319  | 6.95 | promoter          |
| AT4G00060 | MATERNAL EFFECT EMBRYO ARREST      | maternal effect   | 4_211166    | 6.95 | promoter          |
| AT4G30240 | na                                 | Syntaxin/t-SNAI   | 4_14810048  | 6.95 | promoter          |
| AT2G01755 | na                                 | unknown protei    | 2_332854    | 6.95 | promoter          |

|           |                                     |                    |            |      |                   |
|-----------|-------------------------------------|--------------------|------------|------|-------------------|
| AT5G13950 | na                                  | unknown protei     | 5_4500762  | 6.95 | promoter          |
| AT2G01760 | RESPONSE REGULATOR 14 (RR14)        | member of Resj     | 2_332854   | 6.95 | promoter          |
| AT5G13960 | SU(VAR)3-9 HOMOLOG 4 (SUVH4)        | Encodes a histc    | 5_4500762  | 6.95 | proximal promoter |
| AT1G09960 | SUCROSE TRANSPORTER 4 (SUT4)        | low affinity (10r  | 1_3247960  | 6.95 | intergenic        |
| AT3G50530 | CDPK-RELATED KINASE (CRK)           | CDPK-related k     | 3_18752186 | 6.94 | proximal promoter |
| AT1G19410 | na                                  | FBD / Leucine F    | 1_6714510  | 6.94 | exon              |
| AT1G19400 | na                                  | Erythronate-4-p    | 1_6714510  | 6.94 | promoter          |
| AT4G23740 | na                                  | Leucine-rich ref   | 4_12366344 | 6.94 | promoter          |
| AT5G60270 | na                                  | Concanavalin A     | 5_24257597 | 6.94 | promoter          |
| AT2G33700 | PROTEIN PHOSPHATASE 2C G GROUP      | Encodes a puta     | 2_14253176 | 6.94 | promoter          |
| AT3G19100 | na                                  | Protein kinase s   | 3_6605518  | 6.93 | five_prime_UTR    |
| AT3G62600 | (ATERDJ3B)                          | J domain protei    | 3_23153697 | 6.92 | promoter          |
| AT4G33650 | DYNAMIN-RELATED PROTEIN 3A (DRP)    | Encodes a prote    | 4_16167145 | 6.92 | downstream        |
| AT5G25220 | KNOTTED1-LIKE HOMEBOX GENE 3 (l     | A member of cle    | 5_8730960  | 6.92 | intergenic        |
| AT4G33660 | na                                  | unknown protei     | 4_16167145 | 6.92 | downstream        |
| AT5G59790 | na                                  | CONTAINS Inte      | 5_24092239 | 6.92 | exon              |
| AT5G59430 | TELOMERIC REPEAT BINDING PROTEIN    | Encodes a telor    | 5_23966335 | 6.92 | proximal promoter |
| AT1G64080 | MEMBRANE-ASSOCIATED KINASE REG      | Encodes a merr     | 1_23787359 | 6.91 | proximal promoter |
| AT4G19440 | na                                  | Tetratricopeptid   | 4_10604740 | 6.91 | promoter          |
| AT5G23530 | CARBOXYESTERASE 18 (CXE18)          | carboxyesteras     | 5_7933048  | 6.9  | three_prime_UTR   |
| AT2G22668 | MICRORNA405A (MIR405A)              | Encodes a micr     | 2_9631665  | 6.9  | intergenic        |
| AT5G23520 | na                                  | smr (Small Mut     | 5_7933048  | 6.9  | proximal promoter |
| AT1G16920 | RAB GTPASE HOMOLOG A1B (RABA1b)     | small GTP-bind     | 1_5789298  | 6.9  | promoter          |
| AT1G58290 | (HEMA1)                             | Encodes a prot     | 1_21626347 | 6.89 | promoter          |
| AT3G10650 | (NUP1)                              | Encodes a nuclei   | 3_3331182  | 6.89 | promoter          |
| AT4G24510 | ECERIFERUM 2 (CER2)                 | Involved in C28    | 4_12660737 | 6.89 | promoter          |
| AT4G11355 | na                                  | pre-tRNA; tRNA     | 4_6905667  | 6.89 | promoter          |
| AT4G24500 | na                                  | hydroxyproline-4   | 4_12660737 | 6.89 | downstream        |
| AT5G47500 | PECTIN METHYLESTERASE 5 (PME5)      | predicted to enc   | 5_19271530 | 6.89 | exon              |
| AT4G11360 | RING-H2 FINGER A1B (RHA1B)          | Encodes a puta     | 4_6905667  | 6.89 | promoter          |
| AT1G63670 | TON1 RECRUITING MOTIF 12 (TRM12)    | CONTAINS Inte      | 1_23613014 | 6.89 | proximal promoter |
| AT1G64200 | VACUOLAR H+-ATPASE SUBUNIT E ISO    | vacuolar H+-AT     | 1_23830144 | 6.89 | promoter          |
| AT3G63440 | CYTOKININ OXIDASE/DEHYDROGENAS      | This gene used     | 3_23422858 | 6.88 | proximal promoter |
| AT1G04270 | CYTOSOLIC RIBOSOMAL PROTEIN S15     | Encodes cytos      | 1_1143905  | 6.88 | proximal promoter |
| AT5G15210 | HOMEBOX PROTEIN 30 (HB30)           | Encodes ZFHD:      | 5_4939123  | 6.88 | promoter          |
| AT1G71040 | LOW PHOSPHATE ROOT2 (LPR2)          | Encodes LPR2:      | 1_26801925 | 6.88 | proximal promoter |
| AT3G63445 | na                                  | Potential natura   | 3_23422858 | 6.88 | exon              |
| AT1G04280 | na                                  | P-loop containir   | 1_1143905  | 6.88 | intron            |
| AT3G17770 | na                                  | Dihydroxyaceto     | 3_6086195  | 6.88 | promoter          |
| AT3G17780 | na                                  | FUNCTIONS IN       | 3_6086195  | 6.88 | proximal promoter |
| AT2G02710 | PAS/LOV PROTEIN B (PLPB)            | Encodes a puta     | 2_761885   | 6.88 | proximal promoter |
| AT5G67560 | ADP-RIBOSYLATION FACTOR-LIKE A1D    | A member of AF     | 5_26950029 | 6.87 | promoter          |
| AT1G55120 | BETA-FRUCTOFURANOSIDASE 5 (FRUC     | Encodes a prote    | 1_20566162 | 6.87 | intron            |
| AT1G31880 | BREVIS RADIX (BRX)                  | Belongs to five-   | 1_11445304 | 6.87 | promoter          |
| AT1G70210 | CYCLIN D1:1 (CYCD1:1)               | Encodes a D-tyl    | 1_26439586 | 6.87 | promoter          |
| AT3G10050 | L-O-METHYLTHREONINE RESISTANT 1     | first enzyme in t  | 3_3098194  | 6.87 | intergenic        |
| AT1G73630 | na                                  | EF hand calciur    | 1_27685957 | 6.87 | intergenic        |
| AT4G33080 | na                                  | AGC (cAMP-de       | 4_15959685 | 6.87 | promoter          |
| AT1G70209 | na                                  | unknown protei     | 1_26439586 | 6.87 | downstream        |
| AT1G22885 | na                                  | unknown protei     | 1_8102648  | 6.87 | intergenic        |
| AT1G22890 | na                                  | unknown protei     | 1_8102648  | 6.87 | promoter          |
| AT1G22910 | na                                  | RNA-binding (R     | 1_8102648  | 6.87 | proximal promoter |
| AT1G22882 | na                                  | Galactose-bind     | 1_8102648  | 6.87 | intergenic        |
| AT3G10040 | na                                  | sequence-speci     | 3_3098194  | 6.87 | promoter          |
| AT3G29577 | na                                  | transposable elk   | 3_11386935 | 6.87 | proximal promoter |
| AT4G17720 | na                                  | RNA-binding (R     | 4_9865100  | 6.87 | promoter          |
| AT5G23640 | na                                  | unknown protei     | 5_7968300  | 6.87 | exon              |
| AT5G23630 | PHOSPHATE DEFICIENCY RESPONSE ;     | A member of th     | 5_7968300  | 6.87 | promoter          |
| AT4G17730 | SYNTAXIN OF PLANTS 23 (SYP23)       | member of SYP      | 4_9865100  | 6.87 | promoter          |
| AT5G03630 | (ATMDAR2)                           | ATMDAR2; FUI       | 5_925605   | 6.86 | proximal promoter |
| AT4G23990 | CELLULOSE SYNTHASE LIKE G3 (CSLG    | encodes a prote    | 4_12458168 | 6.86 | exon              |
| AT1G65930 | CYTOSOLIC NADP+-DEPENDENT ISOCIT    | Encodes a NAC      | 1_24538297 | 6.86 | proximal promoter |
| AT2G31570 | GLUTATHIONE PEROXIDASE 2 (GPX2)     | glutathione per    | 2_13439938 | 6.86 | promoter          |
| AT1G44350 | IAA-LEUCINE RESISTANT (ILR)-LIKE GE | encodes a prote    | 1_16837521 | 6.86 | intron            |
| AT5G66440 | na                                  | unknown protei     | 5_26531943 | 6.86 | proximal promoter |
| AT1G29880 | na                                  | glycyl-tRNA syn    | 1_10462940 | 6.86 | promoter          |
| AT1G63420 | na                                  | CONTAINS Inte      | 1_23516881 | 6.86 | exon              |
| AT5G60460 | na                                  | Preprotein trans   | 5_24316176 | 6.86 | intergenic        |
| AT5G64850 | na                                  | FUNCTIONS IN       | 5_25922569 | 6.86 | intron            |
| AT4G21960 | (PRXR1)                             | Encodes AT4q2      | 4_11646062 | 6.85 | downstream        |
| AT4G19020 | CHROMOMETHYLASE 2 (CMT2)            | chromomethyla:     | 4_10421469 | 6.85 | intergenic        |
| AT3G11590 | na                                  | unknown protei     | 3_3658063  | 6.85 | proximal promoter |
| AT1G31660 | na                                  | CONTAINS Inte      | 1_11333818 | 6.85 | promoter          |
| AT4G21950 | na                                  | unknown protei     | 4_11646062 | 6.85 | intergenic        |
| AT4G19030 | NOD26-LIKE MAJOR INTRINSIC PROTEI   | an aquaporin w     | 4_10421469 | 6.85 | downstream        |
| AT1G71960 | ATP-BINDING CASSETTE G25 (ABC G25)  | Encodes a plasi    | 1_27086682 | 6.84 | intron            |
| AT2G27080 | na                                  | Late embryoqer     | 2_11566280 | 6.84 | intron            |
| AT2G27090 | na                                  | Protein of unknc   | 2_11566280 | 6.84 | intergenic        |
| AT1G77640 | na                                  | encodes a mem      | 1_29179724 | 6.84 | downstream        |
| AT4G34800 | na                                  | SAUR-like auxir    | 4_16596493 | 6.84 | promoter          |
| AT3G13320 | CATION EXCHANGER 2 (CAX2)           | low affinity calci | 3_4319333  | 6.83 | intergenic        |
| AT1G48000 | MYB DOMAIN PROTEIN 112 (MYB112)     | Encodes a puta     | 1_17702707 | 6.83 | intergenic        |
| AT3G50340 | na                                  | unknown protei     | 3_18669898 | 6.83 | intergenic        |
| AT1G18210 | na                                  | Calcium-binding    | 1_6267797  | 6.83 | intron            |
| AT1G52290 | PROLINE-RICH EXTENSIN-LIKE RECEPT   | Encodes a merr     | 1_19470129 | 6.83 | three_prime_UTR   |
| AT3G13330 | PROTEASOME ACTIVATING PROTEIN 2     | Encodes a prote    | 3_4319333  | 6.83 | intergenic        |
| AT1G18220 | PURINE PERMEASE 9 (PUP9)            | Member of a far    | 1_6267797  | 6.83 | intergenic        |
| AT1G18200 | RAB GTPASE HOMOLOG A6B (RABA6b)     | RAB GTPase hr      | 1_6267797  | 6.83 | proximal promoter |
| AT1G52280 | RAB GTPASE HOMOLOG G3D (RABG3d)     | RAB GTPase hr      | 1_19470129 | 6.83 | proximal promoter |
| AT2G36570 | na                                  | Leucine-rich ref   | 2_15338543 | 6.82 | intergenic        |
| AT2G36571 | na                                  | unknown protei     | 2_15338543 | 6.82 | promoter          |
| AT2G36580 | na                                  | Pyruvate kinase    | 2_15338543 | 6.82 | proximal promoter |
| AT1G61350 | na                                  | ARM repeat sur     | 1_22633846 | 6.82 | promoter          |
| AT5G26220 | na                                  | ChaC-like famil    | 5_9166060  | 6.82 | proximal promoter |



|           |                                    |                              |      |                   |
|-----------|------------------------------------|------------------------------|------|-------------------|
| AT1G14750 | SOLO DANCERS (SDS)                 | Encodes a meic 1_5082616     | 6.82 | promoter          |
| AT5G16910 | CELLULOSE-SYNTHASE LIKE D2 (CSLD)  | encodes a gene 5_5560175     | 6.81 | proximal promoter |
| AT1G14440 | HOMEODOMAIN PROTEIN 31 (HB31)      | homeobox prote 1_4938338     | 6.81 | intergenic        |
| AT5G63490 | na                                 | CBS / octicosap 5_25423371   | 6.81 | proximal promoter |
| AT5G63500 | na                                 | Protein of unkn 5_25423371   | 6.81 | promoter          |
| AT1G01500 | na                                 | Erythronate-4-p 1_184988     | 6.81 | promoter          |
| AT4G18250 | na                                 | receptor serine/ 4_10090781  | 6.81 | intron            |
| AT5G15560 | na                                 | Leucine-rich ref 5_20946534  | 6.81 | intron            |
| AT4G24230 | ACYL-COA-BINDING DOMAIN 3 (ACBP3)  | acyl-CoA-bindin 4_12568937   | 6.8  | promoter          |
| AT5G40480 | EMBRYO DEFECTIVE 3012 (EMB3012)    | embryo defectiv 5_16213089   | 6.8  | promoter          |
| AT3G02050 | K+ UPTAKE TRANSPORTER 3 (KUP3)     | potassium trans 3_350280     | 6.8  | promoter          |
| AT5G01240 | LIKE AUXIN RESISTANT 1 (LAX1)      | Encodes LAX1 5_100271        | 6.8  | exon              |
| AT4G04750 | na                                 | Major facilitator 4_2417214  | 6.8  | proximal promoter |
| AT4G24231 | na                                 | This gene encod 4_12568937   | 6.8  | exon              |
| AT3G02040 | SENESCENCE-RELATED GENE 3 (SRG)    | Encodes a merr 3_350280      | 6.8  | promoter          |
| AT4G24210 | SLEEPY1 (SLY1)                     | F-box protein th 4_12568937  | 6.8  | intergenic        |
| AT1G22360 | UDP-GLUCOSYL TRANSFERASE 85A2      | ( UDP-glucosyl tr 1_7897743  | 6.8  | promoter          |
| AT1G22370 | UDP-GLUCOSYL TRANSFERASE 85A5      | ( UDP-glucosyl tr 1_7897743  | 6.8  | intergenic        |
| AT4G24220 | VEIN PATTERNING 1 (VEP1)           | encodes a prog 4_12568937    | 6.8  | intergenic        |
| AT1G18710 | MYB DOMAIN PROTEIN 47 (MYB47)      | Member of the f 1_6443767    | 6.79 | intergenic        |
| AT3G14360 | na                                 | alpha/beta-Hydr 3_4790551    | 6.79 | proximal promoter |
| AT1G18700 | na                                 | DNAJ heat shok 1_6443767     | 6.79 | intron            |
| AT1G56540 | na                                 | Disease resistat 1_21181538  | 6.78 | promoter          |
| AT3G30778 | na                                 | This gene encod 3_12457264   | 6.78 | intergenic        |
| AT4G04210 | PLANT UBX DOMAIN CONTAINING PRO    | Arabidopsis tha 4_2030250    | 6.78 | promoter          |
| AT5G60200 | TARGET OF MONOPTEROS 6 (TMO6)      | Encodes a Dof- 5_24240144    | 6.78 | proximal promoter |
| AT4G30280 | XYLOGLUCAN ENDOTRANSGLUCOSYL       | Encodes a xylo 4_14828105    | 6.78 | proximal promoter |
| AT5G08790 | (ATAF2)                            | induced by wou 5_2860407     | 6.77 | promoter          |
| AT4G25692 | CONSERVED PEPTIDE UPSTREAM OPE     | Upstream open 4_13091964     | 6.77 | promoter          |
| AT3G13510 | na                                 | Protein of Unkn 3_4402847    | 6.77 | proximal promoter |
| AT5G08780 | na                                 | winged-helix DN 5_2860407    | 6.77 | intergenic        |
| AT4G25690 | na                                 | unknown proteir 4_13091964   | 6.77 | promoter          |
| AT1G09520 | na                                 | LOCATED IN: c 1_3072596      | 6.77 | proximal promoter |
| AT1G30340 | na                                 | transposable elk 1_10695765  | 6.77 | proximal promoter |
| AT3G16850 | na                                 | Pectin lyase-like 3_5747484  | 6.77 | proximal promoter |
| AT2G03120 | SIGNAL PEPTIDE PEPTIDASE (SPP)     | homologous to : 2_937318     | 6.76 | promoter          |
| AT3G07650 | CONSTANS-LIKE 9 (COL9)             | This gene belon 3_2441393    | 6.75 | promoter          |
| AT5G16050 | GENERAL REGULATORY FACTOR 5 (GI    | Encodes GF14 5_5245842       | 6.75 | promoter          |
| AT2G46370 | JASMONATE RESISTANT 1 (JAR1)       | Encodes a jasm 2_19031889    | 6.75 | proximal promoter |
| AT5G07860 | na                                 | HXXXD-type ac 5_2513511      | 6.75 | intergenic        |
| AT5G07870 | na                                 | HXXXD-type ac 5_2513511      | 6.75 | promoter          |
| AT4G15240 | na                                 | Protein of unkn 4_8705554    | 6.75 | promoter          |
| AT5G64343 | CONSERVED PEPTIDE UPSTREAM OPE     | Upstream open 5_25730568     | 6.74 | three_prime_UTR   |
| AT5G64342 | CONSERVED PEPTIDE UPSTREAM OPE     | Upstream open 5_25730568     | 6.74 | three_prime_UTR   |
| AT5G64341 | CONSERVED PEPTIDE UPSTREAM OPE     | Upstream open 5_25730568     | 6.74 | three_prime_UTR   |
| AT1G32540 | LSD ONE LIKE 1 (LOL1)              | Encodes a prote 1_11767608   | 6.74 | five_prime_UTR    |
| AT1G01100 | na                                 | 60S acidic ribos 1_51388     | 6.74 | promoter          |
| AT2G12461 | na                                 | unknown proteir 2_5050797    | 6.74 | proximal promoter |
| AT2G12462 | na                                 | BEST Arabidop: 2_5050797     | 6.74 | exon              |
| AT5G64330 | NON-PHOTOTROPIC HYPOCOTYL 3 (NF    | Involved in blue 5_25730568  | 6.74 | downstream        |
| AT1G30500 | NUCLEAR FACTOR Y, SUBUNIT A7 (NF-  | nuclear factor Y 1_10806510  | 6.74 | promoter          |
| AT3G47640 | POPEYE (PYE)                       | Encodes POPE 3_17567110      | 6.74 | promoter          |
| AT1G01090 | PYRUVATE DEHYDROGENASE E1 ALP      | pyruvate dehydi 1_51388      | 6.74 | proximal promoter |
| AT5G64340 | SUPPRESSOR OF ACAULIS 51 (SAC51)   | Encodes a bHLI 5_25730568    | 6.74 | three_prime_UTR   |
| AT5G55700 | BETA-AMYLASE 4 (BAM4)              | In vitro assay in 5_22551028 | 6.73 | proximal promoter |
| AT5G62500 | END BINDING PROTEIN 1B (EB1B)      | encodes a hom 5_25091947     | 6.73 | proximal promoter |
| AT1G21050 | na                                 | Protein of unkn 1_7366184    | 6.73 | proximal promoter |
| AT5G64735 | na                                 | pre-tRNA; tRNA 5_25876609    | 6.73 | proximal promoter |
| AT2G38465 | na                                 | unknown proteir 2_16108143   | 6.73 | proximal promoter |
| AT2G38480 | na                                 | Uncharacterise 2_16108143    | 6.73 | intergenic        |
| AT1G30320 | na                                 | Remorin family   1_10685007  | 6.73 | intergenic        |
| AT3G52400 | SYNTAXIN OF PLANTS 122 (SYP122)    | syntaxin protein 3_19427437  | 6.73 | promoter          |
| AT2G38470 | WRKY DNA-BINDING PROTEIN 33 (WRK   | Member of the r 2_16108143   | 6.73 | promoter          |
| AT4G11280 | 1-AMINOCYCLOPROPANE-1-CARBOXYL     | encodes a me 4_6862464       | 6.72 | proximal promoter |
| AT1G07180 | ALTERNATIVE NAD(P)H DEHYDROGEN     | Internal NAD(P) 1_2204002    | 6.72 | promoter          |
| AT2G47760 | ASPARAGINE-LINKED GLYCOSYLATION    | asparagine-link 2_19568394   | 6.72 | promoter          |
| AT3G01370 | CRM FAMILY MEMBER 2 (CFM2)         | Encodes a prote 3_143615     | 6.72 | three_prime_UTR   |
| AT3G51080 | GATA TRANSCRIPTION FACTOR 6 (GAT   | Encodes a merr 3_18974454    | 6.72 | exon              |
| AT1G14520 | MYO-INOSITOL OXYGENASE 1 (MIOX1)   | Encodes MIOX 1_4970463       | 6.72 | promoter          |
| AT4G17440 | na                                 | Protein of unkn 4_9731671    | 6.72 | intergenic        |
| AT3G56060 | na                                 | Glucose-methar 3_20806523    | 6.72 | proximal promoter |
| AT4G36925 | na                                 | unknown proteir 4_17405145   | 6.72 | intergenic        |
| AT3G56070 | ROTAMASE CYCLOPHILIN 2 (ROC2)      | rotamase cyclor 3_20806523   | 6.72 | downstream        |
| AT1G14530 | TOM THREE HOMOLOG 1 (THH1)         | TOM THREE H 1_4970463        | 6.72 | intergenic        |
| AT2G47770 | TSPO(OUTER MEMBRANE TRYPTOPHA      | Encodes a merr 2_19568394    | 6.72 | promoter          |
| AT1G65620 | ASYMMETRIC LEAVES 2 (AS2)          | required for for 1_24397083  | 6.71 | proximal promoter |
| AT3G54810 | BLUE MICROPYLAR END 3 (BME3)       | Encodes a prote 3_20296179   | 6.71 | promoter          |
| AT5G10170 | MYO-INOSITOL-1-PHOSPHATE SYNTHA    | myo-inositol-1-p 5_3191107   | 6.71 | proximal promoter |
| AT3G15820 | REDUCED OLEATE DESATURATION 1 (    | Functions as ph 3_5351817    | 6.71 | intron            |
| AT5G61380 | TIMING OF CAB EXPRESSION 1 (TOC1)  | Pseudo respons 5_24674951    | 6.71 | promoter          |
| AT5G66730 | INDETERMINATE DOMAIN 1 (IDD1)      | C2H2-like zinc f 5_26641593  | 6.7  | downstream        |
| AT2G47440 | na                                 | Tetratricopeptid 2_19468136  | 6.7  | proximal promoter |
| AT3G49810 | na                                 | ARM repeat sur 3_18478545    | 6.7  | proximal promoter |
| AT4G30060 | na                                 | Core-2/l-branch 4_14691804   | 6.7  | intron            |
| AT5G66720 | na                                 | Protein phosph 5_26641593    | 6.7  | proximal promoter |
| AT1G01030 | NGATHA3 (NGA3)                     | NGATHA3 (NG. 1_16732         | 6.7  | intergenic        |
| AT1G19950 | HVA22-LIKE PROTEIN H (ATHVA22H) (H | HVA22-like prot 1_6923998    | 6.69 | promoter          |
| AT2G46685 | MICRORNA166A (MIR166A)             | Encodes a micr 2_19175873    | 6.69 | promoter          |
| AT1G20030 | na                                 | Pathogenesis-rr 1_6946445    | 6.69 | exon              |
| AT1G70740 | na                                 | Protein kinase s 1_26678618  | 6.69 | proximal promoter |
| AT3G05470 | na                                 | Actin-binding Ff 3_1583142   | 6.69 | proximal promoter |
| AT3G16560 | na                                 | Protein phosph 3_5637974     | 6.69 | intron            |
| AT3G16380 | POLY(A) BINDING PROTEIN 6 (PAB6)   | polyadenylate-b 3_5561265    | 6.69 | promoter          |
| AT2G01340 | (At17.1)                           | Encodes a prote 2_163905     | 6.68 | promoter          |

|           |                                                                        |                   |              |      |                   |
|-----------|------------------------------------------------------------------------|-------------------|--------------|------|-------------------|
| AT3G61150 | HOMEODOMAIN GLABROUS 1 (HDG1)                                          | Encodes a hom     | 3_22630521   | 6.68 | promoter          |
| AT5G25240 | na                                                                     | unknown protei    | 5_8747337    | 6.68 | promoter          |
| AT4G01330 | na                                                                     | Protein kinase s  | 4_553212     | 6.68 | downstream        |
| AT4G01335 | na                                                                     | FUNCTIONS IN      | 4_553212     | 6.68 | promoter          |
| AT1G78140 | na                                                                     | S-adenosyl-L-m    | 1_29403984   | 6.68 | promoter          |
| AT1G78150 | na                                                                     | unknown protei    | 1_29403984   | 6.68 | proximal promoter |
| AT1G23860 | RS-CONTAINING ZINC FINGER PROTEIN                                      | Encodes a 9G8     | 1_8430130    | 6.68 | proximal promoter |
| AT5G38420 | RUBISCO SMALL SUBUNIT 2B (RBCS2B)                                      | Encodes a merr    | 5_15382168   | 6.68 | promoter          |
| AT1G20980 | SQUAMOSA PROMOTER BINDING PROTEIN                                      | Encodes a nucl    | 1_7322926    | 6.68 | proximal promoter |
| AT1G23870 | TREHALOSE-PHOSPHATASE/SYNTHASE                                         | Encodes an enz    | 1_8430130    | 6.68 | proximal promoter |
| AT5G26210 | ALFIN-LIKE 4 (AL4)                                                     | Encodes a merr    | 5_9160339    | 6.67 | five_prime_UTR    |
| AT5G10240 | ASPARAGINE SYNTHETASE 3 (ASN3)                                         | Encodes aspar     | 5_3216642    | 6.67 | promoter          |
| AT2G41010 | CALMODULIN (CAM)-BINDING PROTEIN                                       | Encodes a nove    | 2_17115235   | 6.67 | promoter          |
| AT4G18700 | CBL-INTERACTING PROTEIN KINASE 12                                      | Encodes CBL-ir    | 4_10291849   | 6.67 | proximal promoter |
| AT3G29030 | EXPANSIN A5 (EXPA5)                                                    | Encodes an exp    | 3_11012079   | 6.67 | intron            |
| AT3G18170 | na                                                                     | Glycosyltransfe   | 3_6228535    | 6.67 | exon              |
| AT1G05870 | na                                                                     | Protein of unkn   | 1_1773856    | 6.67 | proximal promoter |
| AT2G41000 | na                                                                     | Chaperone Dna     | 2_17115235   | 6.67 | intergenic        |
| AT2G01570 | REPRESSOR OF GA1-3 1 (RGA1)                                            | Member of the     | 1_2_261952   | 6.67 | intergenic        |
| AT4G24740 | FUS3-COMPLEMENTING GENE 2 (FC2)                                        | a LAMMER-tyr      | 4_12757903   | 6.66 | promoter          |
| AT2G28340 | GATA TRANSCRIPTION FACTOR 13 (GATA13)                                  | Encodes a merr    | 2_12107383   | 6.66 | intergenic        |
| AT5G06700 | na                                                                     | Encodes a merr    | 5_2066363    | 6.66 | intergenic        |
| AT5G62710 | na                                                                     | Leucine-rich re   | 5_25187028   | 6.66 | promoter          |
| AT1G29465 | na                                                                     | unknown protei    | 1_10308382   | 6.66 | promoter          |
| AT3G05500 | na                                                                     | Rubber elongati   | 3_1590668    | 6.66 | proximal promoter |
| AT3G05510 | na                                                                     | Phospholipid/g    | 3_1590668    | 6.66 | intergenic        |
| AT1G30110 | NUDIX HYDROLASE HOMOLOG 25 (NUDIX25)                                   | nudix hydrolase   | 1_10581390   | 6.66 | promoter          |
| AT3G47290 | PHOSPHATIDYLINOSITOL-SPECIFIC PHOSPHATIDYLTRANSFERASE 1 (PIP2-5-PTase) | phosphatidyli     | 3_17420340   | 6.66 | promoter          |
| AT3G05490 | RALF-LIKE 22 (RALFL22)                                                 | Member of a div   | 3_1590668    | 6.66 | proximal promoter |
| AT5G62700 | TUBULIN BETA CHAIN 3 (TUB3)                                            | encodes tubulin   | 5_25187028   | 6.66 | intergenic        |
| AT5G25460 | DUF642 L-GALL RESPONSIVE GENE 2                                        | Protein of unkn   | 5_8861365    | 6.65 | proximal promoter |
| AT5G57010 | na                                                                     | calmodulin-bind   | 5_23067631   | 6.65 | promoter          |
| AT5G65700 | BARELY ANY MERISTEM 1 (BAM1)                                           | Encodes a CLA     | 5_26280319   | 6.64 | proximal promoter |
| AT1G75750 | GAST1 PROTEIN HOMOLOG 1 (GASA1)                                        | GA-responsive     | 1_28439833   | 6.64 | intergenic        |
| AT2G38540 | LIPID TRANSFER PROTEIN 1 (LP1)                                         | Non-specific lipi | 2_16130283   | 6.64 | promoter          |
| AT2G22805 | na                                                                     | Encodes a defe    | 2_9710595    | 6.64 | proximal promoter |
| AT2G30760 | na                                                                     | unknown protei    | 2_13106919   | 6.64 | intron            |
| AT2G30766 | na                                                                     | unknown protei    | 2_13106919   | 6.64 | proximal promoter |
| AT3G55140 | na                                                                     | Pectin lyase-li   | 3_20438656   | 6.64 | promoter          |
| AT5G19970 | na                                                                     | unknown protei    | 5_6748733    | 6.64 | downstream        |
| AT1G75730 | na                                                                     | unknown protei    | 1_28439833   | 6.64 | promoter          |
| AT1G75740 | na                                                                     | pre-tRNA; tRNA    | 1_28439833   | 6.64 | proximal promoter |
| AT4G29905 | na                                                                     | unknown protei    | 4_14626308   | 6.64 | intergenic        |
| AT5G45960 | na                                                                     | GDSL-like Lipas   | 5_18638953   | 6.64 | exon              |
| AT2G30260 | U2 SMALL NUCLEAR RIBONUCLEOPROTEIN                                     | encodes U2B",     | 2_12905389   | 6.64 | downstream        |
| AT2G30250 | WRKY DNA-BINDING PROTEIN 25 (WRKY25)                                   | member of WRK     | 2_12905389   | 6.64 | promoter          |
| AT2G35700 | ERF FAMILY PROTEIN 38 (ERF38)                                          | encodes a mem     | 2_15006536   | 6.63 | intergenic        |
| AT3G17390 | METHIONINE OVER-ACCUMULATOR 3 (MOA3)                                   | S-adenosylmeth    | 3_5954492    | 6.63 | promoter          |
| AT1G35430 | na                                                                     | unknown protei    | 1_13030019   | 6.63 | intergenic        |
| AT3G17410 | na                                                                     | Protein kinase s  | 3_5954492    | 6.63 | proximal promoter |
| AT5G54855 | na                                                                     | Pollen Ole e 1    | a 5_22284490 | 6.63 | downstream        |
| AT5G55620 | na                                                                     | unknown protei    | 5_22529886   | 6.63 | promoter          |
| AT5G54860 | na                                                                     | Major facilitator | 5_22284490   | 6.63 | promoter          |
| AT5G64550 | na                                                                     | loricrin-related; | 5_25805120   | 6.63 | promoter          |
| AT1G13260 | RELATED TO ABI3/VP1 1 (RAV1)                                           | Encodes an AP:    | 1_4538785    | 6.63 | intergenic        |
| AT2G30490 | CINNAMATE-4-HYDROXYLASE (C4H)                                          | Encodes a cinn:   | 2_12995843   | 6.62 | promoter          |
| AT3G62610 | MYB DOMAIN PROTEIN 11 (MYB11)                                          | Member of the f   | 3_23155533   | 6.62 | intron            |
| AT5G16120 | na                                                                     | alpha/beta-Hydr   | 5_5265475    | 6.62 | promoter          |
| AT4G18890 | BES1/BZR1 HOMOLOG 3 (BEH3)                                             | BES1/BZR1 hor     | 4_10355774   | 6.61 | downstream        |
| AT5G56870 | BETA-GALACTOSIDASE 4 (BGAL4)                                           | beta-galactosid   | 5_23003362   | 6.61 | proximal promoter |
| AT5G22910 | CATION/H+ EXCHANGER 9 (CHX9)                                           | member of Puta    | 5_7664378    | 6.61 | proximal promoter |
| AT5G21482 | CYTOKININ OXIDASE 7 (CKX7)                                             | This gene used    | 5_7229142    | 6.61 | intron            |
| AT4G18550 | DAD1-LIKE SEEDING ESTABLISHMENT-RELATED PROTEIN 1 (DAD1-1)             | DSEL is cytosol   | 4_10229288   | 6.61 | proximal promoter |
| AT4G09000 | GENERAL REGULATORY FACTOR 1 (GRF1)                                     | Encodes a 14-3    | 4_5775117    | 6.61 | promoter          |
| AT1G17500 | na                                                                     | ATPase E1-E2:     | 1_6017229    | 6.61 | proximal promoter |
| AT3G63240 | na                                                                     | DNase I-like su   | 3_23367541   | 6.61 | five_prime_UTR    |
| AT4G03100 | na                                                                     | Rho GTPase ac     | 4_1374054    | 6.61 | promoter          |
| AT4G18900 | na                                                                     | Transducin/WD     | 4_10355774   | 6.61 | proximal promoter |
| AT5G07780 | na                                                                     | Actin-binding F   | 5_2483048    | 6.61 | downstream        |
| AT5G07790 | na                                                                     | unknown protei    | 5_2483048    | 6.61 | promoter          |
| AT2G03440 | NODULIN-RELATED PROTEIN 1 (NRP1)                                       | Induced at the t  | 2_1040585    | 6.61 | promoter          |
| AT5G39860 | PACLOBUTRAZOL RESISTANCE1 (PRE1)                                       | Encodes PRE1      | 5_15954607   | 6.61 | proximal promoter |
| AT4G15800 | RALF-LIKE 33 (RALFL33)                                                 | Member of a div   | 4_8986033    | 6.61 | intergenic        |
| AT1G28340 | RECEPTOR LIKE PROTEIN 4 (RLP4)                                         | receptor like pr  | 1_9938922    | 6.61 | proximal promoter |
| AT3G05870 | ANAPHASE-PROMOTING COMPLEX/CYTOCHROME C                                | Subunit of the    | a 3_1755496  | 6.6  | intron            |
| AT4G16780 | HOMEODOMAIN PROTEIN 2 (HD2)                                            | Encodes a hom     | 4_9450007    | 6.6  | intron            |
| AT1G29660 | na                                                                     | GDSL-like Lipas   | 1_10365171   | 6.6  | intergenic        |
| AT1G19373 | na                                                                     | snoRNA; snoR      | 1_6697979    | 6.6  | intergenic        |
| AT1G19380 | na                                                                     | Protein of unkn   | 1_6697979    | 6.6  | promoter          |
| AT3G05880 | RARE-COLD-INDUCIBLE 2A (RCI2A)                                         | Induced by low    | 3_1755496    | 6.6  | intron            |
| AT1G76080 | CHLOROPLASTIC DROUGHT-INDUCED PROTEIN 1 (CDIP1)                        | Encodes a thior   | 1_28547791   | 6.59 | three_prime_UTR   |
| AT1G44790 | na                                                                     | ChaC-like famil   | 1_16913654   | 6.59 | five_prime_UTR    |
| AT5G65015 | na                                                                     | pre-tRNA; tRNA    | 5_25972830   | 6.59 | downstream        |
| AT1G76070 | na                                                                     | unknown protei    | 1_28547791   | 6.59 | downstream        |
| AT4G33666 | na                                                                     | unknown protei    | 4_16168912   | 6.59 | promoter          |
| AT5G35805 | na                                                                     | transposable el   | 5_13988709   | 6.59 | intergenic        |
| AT5G57790 | na                                                                     | unknown protei    | 5_23411641   | 6.58 | intergenic        |
| AT5G23460 | na                                                                     | unknown protei    | 5_7913417    | 6.58 | three_prime_UTR   |
| AT5G23470 | na                                                                     | Haloacid dehal    | 5_7913417    | 6.58 | promoter          |
| AT4G16880 | na                                                                     | Leucine-rich re   | 4_9496377    | 6.58 | three_prime_UTR   |
| AT5G22390 | na                                                                     | Protein of unkn   | 5_7419083    | 6.58 | five_prime_UTR    |
| AT1G19835 | na                                                                     | Plant protein of  | 1_6863115    | 6.58 | proximal promoter |
| AT1G69900 | na                                                                     | Actin cross-link  | 1_26328029   | 6.58 | promoter          |
| AT2G30990 | na                                                                     | Protein of unkn   | 2_13190629   | 6.58 | promoter          |

|           |                                                            |                              |      |                   |
|-----------|------------------------------------------------------------|------------------------------|------|-------------------|
| AT5G57010 | na                                                         | calmodulin-bind 5_23066893   | 6.58 | proximal promoter |
| AT5G02480 | na                                                         | HSP20-like chai 5_547510     | 6.58 | promoter          |
| AT3G14440 | NINE-CIS-EPOXYCAROTENOID DIOXYG                            | Encodes 9-<i>< 3_4841151     | 6.58 | intergenic        |
| AT3G26690 | NUDIX HYDROLASE HOMOLOG 13 (NUH1)                          | Encodes AtNUH1_3_9807592     | 6.58 | proximal promoter |
| AT1G12710 | PHLOEM PROTEIN 2-A12 (PP2-A12)                             | This gene is pre 1_4329441   | 6.58 | proximal promoter |
| AT4G16860 | RECOGNITION OF PERONOSPORA PAF                             | Confers resistar 4_9496377   | 6.58 | proximal promoter |
| AT3G12690 | AGC KINASE 1.5 (AGC1.5)                                    | Encodes a puta 3_4034460     | 6.57 | proximal promoter |
| AT3G62420 | BASIC REGION/LEUCINE ZIPPER MOTIF                          | Encodes a grou 3_23093039    | 6.57 | promoter          |
| AT5G62390 | BCL-2-ASSOCIATED ATHANOGENE 7 (E A member of Ar 5_25054277 |                              | 6.57 | five_prime_UTR    |
| AT3G62422 | CONSERVED PEPTIDE UPSTREAM OPE                             | Upstream open 3_23093039     | 6.57 | promoter          |
| AT3G62410 | CP12 DOMAIN-CONTAINING PROTEIN 2 CP12-2                    | encode 3_23093039            | 6.57 | intergenic        |
| AT1G76490 | HYDROXY METHYLGLUTARYL COA REI                             | Encodes a 3-hy 1_28698213    | 6.57 | three_prime_UTR   |
| AT5G62400 | na                                                         | unknown proteir 5_25054277   | 6.57 | intergenic        |
| AT1G27210 | na                                                         | ARM repeat sur 1_9455074     | 6.57 | intergenic        |
| AT3G62400 | na                                                         | unknown proteir 3_23093039   | 6.57 | intergenic        |
| AT4G29310 | na                                                         | Protein of unknt 4_14440479  | 6.57 | proximal promoter |
| AT4G38520 | na                                                         | Protein phosphz 4_18018441   | 6.57 | promoter          |
| AT3G22380 | TIME FOR COFFEE (TIC)                                      | Encodes a nucl 3_7912589     | 6.57 | promoter          |
| AT1G75360 | na                                                         | unknown proteir 1_28274265   | 6.56 | promoter          |
| AT4G25280 | na                                                         | P-loop containir 4_12941084  | 6.55 | promoter          |
| AT4G25290 | na                                                         | DNA photolyase 4_12941084    | 6.55 | downstream        |
| AT2G44940 | na                                                         | encodes a mem 2_18537029     | 6.55 | promoter          |
| AT5G37270 | na                                                         | RING/U-box suj 5_14755702    | 6.55 | intergenic        |
| AT5G21170 | (AKINBETA1)                                                | Encodes AKINb 5_7205565      | 6.54 | five_prime_UTR    |
| AT1G01120 | 3-KETOACYL-COA SYNTHASE 1 (KCS1)                           | Encodes a conc 1_57143       | 6.54 | downstream        |
| AT2G40475 | ALTERED SEED GERMINATION 8 (ASG8)                          | unknown proteir 2_16906811   | 6.54 | downstream        |
| AT2G33470 | GLYCOLIPID TRANSFER PROTEIN 1 (GL1)                        | glycolipid transf 2_14179776 | 6.54 | proximal promoter |
| AT2G18350 | HOMEOBOX PROTEIN 24 (HB24)                                 | homeobox prote 2_7972386     | 6.54 | promoter          |
| AT1G02590 | na                                                         | Aldehyde oxidaz 1_552832     | 6.54 | promoter          |
| AT1G02600 | na                                                         | pre-tRNA; tRNA 1_552832      | 6.54 | downstream        |
| AT2G25250 | na                                                         | unknown proteir 2_10753853   | 6.54 | five_prime_UTR    |
| AT2G25255 | na                                                         | Encodes a defe 2_10753853    | 6.54 | intergenic        |
| AT1G01115 | na                                                         | unknown proteir 1_57143      | 6.54 | intergenic        |
| AT1G02610 | na                                                         | RING/FYVE/PH 1_552832        | 6.54 | downstream        |
| AT4G22730 | na                                                         | Leucine-rich ref 4_11941026  | 6.54 | promoter          |
| AT5G09760 | na                                                         | Plant invertase/ 5_3032198   | 6.54 | promoter          |
| AT2G33480 | NAC DOMAIN CONTAINING PROTEIN 41 (NAC41)                   | NAC domain co 2_14179776     | 6.54 | proximal promoter |
| AT4G16370 | OLIGOPEPTIDE TRANSPORTER (OPT3)                            | Encodes an oliq 4_9250496    | 6.54 | promoter          |
| AT4G18197 | PURINE PERMEASE 7 (PUP7)                                   | Member of a far 4_10071573   | 6.54 | promoter          |
| AT5G08130 | (BIM1)                                                     | Arabidopsis thal 5_2611653   | 6.53 | proximal promoter |
| AT5G11950 | LONELY GUY 8 (LOG8)                                        | Encodes a prote 5_3857198    | 6.53 | downstream        |
| AT3G17800 | na                                                         | mRNA level of t 3_6093679    | 6.53 | proximal promoter |
| AT4G21910 | na                                                         | MATE efflux fan 4_11633015   | 6.53 | proximal promoter |
| AT3G17790 | PURPLE ACID PHOSPHATASE 17 (PAP1)                          | Expression is u 3_6093679    | 6.53 | intergenic        |
| AT3G17810 | PYRIMIDINE 1 (PYD1)                                        | Encodes a prote 3_6093679    | 6.53 | promoter          |
| AT1G05810 | RAB GTPASE HOMOLOG A5E (RABASE1)                           | RAB GTPase hr 1_1748321      | 6.53 | exon              |
| AT3G17840 | RECEPTOR-LIKE KINASE 902 (RLK902)                          | Encodes a rece 3_6105347     | 6.53 | proximal promoter |
| AT2G01470 | SEC12P-LIKE 2 PROTEIN (STL2P)                              | Sec12p-like pro 2_214631     | 6.53 | promoter          |
| AT5G45340 | CYTOCHROME P450, FAMILY 707, SUBF                          | Encodes a prote 5_18371022   | 6.52 | promoter          |
| AT4G00310 | EMBRYO SAC DEVELOPMENT ARREST                              | EMBRYO SAC 4_133065          | 6.52 | proximal promoter |
| AT4G01220 | MALE GAMETOPHYTE DEFECTIVE 4 (MD4)                         | Encodes MGP4 4_513087        | 6.52 | downstream        |
| AT1G10590 | na                                                         | Nucleic acid-bin 1_3503517   | 6.52 | promoter          |
| AT5G48385 | na                                                         | FRIGIDA-like pr 5_19608440   | 6.52 | promoter          |
| AT4G17100 | na                                                         | EXPRESSED IN 4_9612656       | 6.52 | intron            |
| AT1G22190 | na                                                         | The gene encoc 1_7834272     | 6.52 | proximal promoter |
| AT4G01210 | na                                                         | glycosyl transfe 4_513087    | 6.52 | promoter          |
| AT4G18810 | na                                                         | NAD(P)-binding 4_10321691    | 6.52 | intergenic        |
| AT5G64410 | OLIGOPEPTIDE TRANSPORTER 4 (OPT4)                          | oligopeptide trai 5_25753249 | 6.52 | intron            |
| AT3G16500 | PHYTOCHROME-ASSOCIATED PROTEIN 1 (PHYA1)                   | phytochrome-as 3_5611377     | 6.52 | intergenic        |
| AT4G18800 | RAB GTPASE HOMOLOG A1D (RABA1D)                            | Encodes RabA1 4_10321691     | 6.52 | promoter          |
| AT1G68560 | ALPHA-XYLOSIDASE 1 (XYL1)                                  | Encodes a bifur 1_25732394   | 6.51 | intergenic        |
| AT1G07220 | na                                                         | FUNCTIONS IN 1_2219027       | 6.51 | intron            |
| AT4G32272 | na                                                         | Nucleotide/suqz 4_15579922   | 6.51 | promoter          |
| AT5G07360 | na                                                         | Amidase family 5_2326593     | 6.51 | downstream        |
| AT1G27210 | na                                                         | ARM repeat sur 1_9456661     | 6.51 | exon              |
| AT2G03565 | na                                                         | unknown proteir 2_1083247    | 6.51 | intergenic        |
| AT3G14440 | NINE-CIS-EPOXYCAROTENOID DIOXYG                            | Encodes 9-<i>< 3_4833682     | 6.51 | promoter          |
| AT2G01150 | RING-H2 FINGER PROTEIN 2B (RHA2B)                          | Encodes a RINK 2_100513      | 6.51 | promoter          |
| AT5G07350 | TUDOR-SN PROTEIN 1 (TUDOR1)                                | RNA binding prr 5_2326593    | 6.51 | proximal promoter |
| AT4G14890 | FERREDOXIN C 1 (FdC1)                                      | 2Fe-2S ferredox 4_8520446    | 6.5  | promoter          |
| AT5G59220 | HIGHLY ABA-INDUCED PP2C GENE 1 (H1)                        | highly ABA-indu 5_23895897   | 6.5  | exon              |
| AT3G13000 | na                                                         | Protein of unknt 3_4161313   | 6.5  | intron            |
| AT4G03292 | na                                                         | Polynucleotidyl 4_1444537    | 6.5  | downstream        |
| AT5G45350 | na                                                         | proline-rich fami 5_18378843 | 6.5  | intergenic        |
| AT4G14880 | O-ACETYL SERINE (THIOL) LYASE (OAS)                        | Encodes a cyto: 4_8520446    | 6.5  | five_prime_UTR    |
| AT3G63130 | RAN GTPASE ACTIVATING PROTEIN 1 (RAV1)                     | Encodes a RAN 3_23324506     | 6.5  | promoter          |
| AT1G18640 | 3-PHOSPHOSERINE PHOSPHATASE (PP2C)                         | Encodes a 3-ph 1_6419047     | 6.49 | promoter          |
| AT2G42790 | CITRATE SYNTHASE 3 (CSY3)                                  | Encodes a pero 2_17806227    | 6.49 | promoter          |
| AT4G04970 | GLUCAN SYNTHASE-LIKE 1 (GSL1)                              | encodes a gene 4_2536735     | 6.49 | promoter          |
| AT3G17040 | HIGH CHLOROPHYLL FLUORESCENT 1 (H1)                        | It is a RNA tetra 3_5812823  | 6.49 | promoter          |
| AT4G40060 | HOMEOBOX PROTEIN 16 (HB16)                                 | Encodes a hom 4_18573088     | 6.49 | promoter          |
| AT3G17050 | na                                                         | transposable eli 3_5812823   | 6.49 | proximal promoter |
| AT4G34975 | na                                                         | pre-tRNA; tRNA 4_16656964    | 6.49 | intergenic        |
| AT1G27500 | na                                                         | Tetratricopeptid 1_9554281   | 6.49 | promoter          |
| AT3G17580 | na                                                         | unknown proteir 3_6016804    | 6.49 | intergenic        |
| AT4G40070 | na                                                         | RING/U-box suj 4_18573088    | 6.49 | intergenic        |
| AT5G57040 | na                                                         | Lactoylglutathio 5_23086240  | 6.49 | proximal promoter |
| AT1G12370 | PHOTOLYASE 1 (PHR1)                                        | encodes an ami 1_4211903     | 6.49 | proximal promoter |
| AT1G18650 | PLASMODESMATA CALLOSE-BINDING 1 (PC1)                      | Encodes a merr 1_6419047     | 6.49 | exon              |
| AT4G34980 | SUBTILISIN-LIKE SERINE PROTEASE 2 (SL2)                    | Serine protease 4_16656964   | 6.49 | exon              |
| AT1G71880 | SUCROSE-PROTON SYMPORTER 1 (SL1)                           | Sucrose transp 1_27048293    | 6.49 | intergenic        |
| AT3G44990 | XYLOGLUCAN ENDO-TRANSGLYCOSYLASE 1 (XET1)                  | xyloglucan endc 3_16446325   | 6.49 | intergenic        |
| AT1G07510 | FTSH PROTEASE 10 (ftsh10)                                  | encodes an Fts1 1_2305257    | 6.48 | promoter          |
| AT5G41130 | na                                                         | Esterase/lipase 5_16459262   | 6.48 | intergenic        |

|           |                                               |                   |               |      |                   |
|-----------|-----------------------------------------------|-------------------|---------------|------|-------------------|
| AT5G41120 | na                                            | Esterase/lipase   | 5_16459262    | 6.48 | promoter          |
| AT2G30362 | na                                            | Potential natura  | 2_12937315    | 6.48 | promoter          |
| AT3G52920 | na                                            | Family of unkno   | 3_19623705    | 6.48 | proximal promoter |
| AT4G02200 | na                                            | Drought-respon    | 4_972488      | 6.48 | promoter          |
| AT5G51190 | na                                            | encodes a mem     | 5_20801625    | 6.48 | promoter          |
| AT2G30360 | SOS3-INTERACTING PROTEIN 4 (SIP4)             | Encodes a SOS     | 2_12937315    | 6.48 | exon              |
| AT4G02195 | SYNTAXIN OF PLANTS 42 (SYP42)                 | Encodes a merr    | 4_972488      | 6.48 | promoter          |
| AT4G23570 | (SGT1A)                                       | Closely related   | 1_4_12299323  | 6.47 | promoter          |
| AT1G19780 | CYCLIC NUCLEOTIDE GATED CHANNEL               | member of Cycl    | 1_6832313     | 6.47 | intergenic        |
| AT5G10440 | CYCLIN D4;2 (CYCD4;2)                         | Encodes a cycli   | 5_3284057     | 6.47 | proximal promoter |
| AT3G49250 | DEFECTIVE IN MERISTEM SILENCING 3             | Similar to hinge  | 3_18261605    | 6.47 | proximal promoter |
| AT5G10450 | G-BOX REGULATING FACTOR 6 (GRF6)              | Encodes a merr    | 5_3284057     | 6.47 | three_prime_UTR   |
| AT5G62480 | GLUTATHIONE S-TRANSFERASE TAU 9               | Encodes a glutat  | 5_25087032    | 6.47 | intergenic        |
| AT1G74430 | MYB DOMAIN PROTEIN 95 (MYB95)                 | Encodes a puta    | 1_27974359    | 6.47 | proximal promoter |
| AT2G41312 | na                                            | Unknown gene      | 2_17225403    | 6.47 | promoter          |
| AT2G34650 | PINOID (PID)                                  | Encodes a prot    | 2_14593775    | 6.47 | proximal promoter |
| AT1G19770 | PURINE PERMEASE 14 (PUP14)                    | Member of a far   | 1_6832313     | 6.47 | promoter          |
| AT1G49480 | RELATED TO VERNALIZATION1 1 (RTV1)            | Encodes a nucl    | 1_18316571    | 6.47 | five_prime_UTR    |
| AT2G41310 | RESPONSE REGULATOR 3 (RR3)                    | Encodes an A-     | 1_2_17225403  | 6.47 | intergenic        |
| AT3G61690 | na                                            | nucleotidyltrans  | 3_22834973    | 6.46 | intergenic        |
| AT3G61700 | na                                            | Plant protein     | 15_3_22834973 | 6.46 | promoter          |
| AT1G17060 | CYTOCHROME P450 72C1 (CYP72C1)                | Encodes a prot    | 1_5835498     | 6.45 | promoter          |
| AT2G46310 | CYTOKININ RESPONSE FACTOR 5 (CRF5)            | CRF5 encodes      | 2_19011134    | 6.45 | promoter          |
| AT2G46308 | na                                            | unknown proteir   | 2_19011134    | 6.45 | downstream        |
| AT4G30410 | na                                            | sequence-speci    | 4_14872229    | 6.45 | promoter          |
| AT4G01100 | ADENINE NUCLEOTIDE TRANSPORTER                | adenine nucleot   | 4_475447      | 6.44 | proximal promoter |
| AT3G17130 | na                                            | Plant invertase/  | 3_5845794     | 6.44 | proximal promoter |
| AT2G22660 | na                                            | Protein of unknc  | 2_9627191     | 6.44 | promoter          |
| AT1G61900 | na                                            | unknown proteir   | 1_22881844    | 6.44 | intergenic        |
| AT2G23755 | na                                            | unknown proteir   | 2_10106526    | 6.44 | proximal promoter |
| AT5G67200 | na                                            | Leucine-rich ref  | 5_26813731    | 6.44 | three_prime_UTR   |
| AT1G72440 | EMBRYO SAC DEVELOPMENT ARREST                 | Encodes SLOW      | 1_27273845    | 6.43 | promoter          |
| AT1G28360 | ERF DOMAIN PROTEIN 12 (ERF12)                 | encodes a mem     | 1_9952915     | 6.43 | downstream        |
| AT1G72450 | JASMONATE-ZIM-DOMAIN PROTEIN 6 (JAZ6)         | JAZ6 transcript   | 1_27273845    | 6.43 | downstream        |
| AT2G01450 | MAP KINASE 17 (MPK17)                         | member of MAF     | 2_203139      | 6.43 | promoter          |
| AT2G31945 | na                                            | unknown proteir   | 2_13582673    | 6.43 | intergenic        |
| AT2G24230 | na                                            | Leucine-rich ref  | 2_10304995    | 6.43 | promoter          |
| AT1G08910 | na                                            | FUNCTIONS IN      | 1_2856031     | 6.43 | promoter          |
| AT2G36770 | na                                            | UDP-Glycosyltr    | 2_15416872    | 6.43 | promoter          |
| AT1G62301 | na                                            | unknown proteir   | 1_23022721    | 6.43 | proximal promoter |
| AT3G06125 | na                                            | Unknown gene      | 3_1852145     | 6.43 | intergenic        |
| AT4G28260 | na                                            | unknown proteir   | 4_14007183    | 6.43 | downstream        |
| AT4G28270 | RING MEMBRANE-ANCHOR 2 (RMA2)                 | Encodes a RINK    | 4_14007183    | 6.43 | intergenic        |
| AT4G13830 | DNAJ-LIKE 20 (J20)                            | DnaJ-like protei  | 4_8011136     | 6.42 | promoter          |
| AT5G45580 | na                                            | Homeodomain-1     | 5_18484229    | 6.42 | proximal promoter |
| AT5G56530 | na                                            | Protein of Unkn   | 5_22888586    | 6.42 | proximal promoter |
| AT1G60000 | na                                            | RNA-binding (R    | 1_22096539    | 6.42 | proximal promoter |
| AT1G60010 | na                                            | unknown proteir   | 1_22096539    | 6.42 | five_prime_UTR    |
| AT3G05900 | na                                            | neurofilament p   | 3_1764053     | 6.42 | promoter          |
| AT3G05905 | na                                            | Potential natura  | 3_1764053     | 6.42 | exon              |
| AT3G05910 | na                                            | Pectinacetylest   | 3_1764053     | 6.42 | intergenic        |
| AT4G30400 | na                                            | RING/U-box suj    | 4_14866928    | 6.42 | promoter          |
| AT5G13920 | na                                            | GRF zinc finger   | 5_4487791     | 6.42 | promoter          |
| AT5G13930 | TRANSPARENT TESTA 4 (TT4)                     | Encodes chalcc    | 5_4487791     | 6.42 | proximal promoter |
| AT5G66700 | HOMEBOX 53 (HB53)                             | Encodes a hom     | 5_26635179    | 6.41 | intron            |
| AT3G27540 | na                                            | beta-1,4-N-acet   | 3_10205083    | 6.41 | promoter          |
| AT4G18920 | na                                            | Protein of unknc  | 4_10370499    | 6.41 | intergenic        |
| AT4G18930 | na                                            | RNA ligase/cycl   | 4_10370499    | 6.41 | promoter          |
| AT5G14110 | na                                            | Protein of unknc  | 5_4555036     | 6.41 | proximal promoter |
| AT5G47560 | TONOPLAST DICARBOXYLATE TRANSFERASE 2 (U2.7)  | Encodes a tono    | 5_19289691    | 6.41 | intron            |
| AT5G61455 | (U2.7)                                        | U2.7; snRNA; g    | 5_24713421    | 6.4  | exon              |
| AT5G66200 | ARMADILLO REPEAT ONLY 2 (ARO2)                | Armadillo repea   | 5_26456381    | 6.4  | proximal promoter |
| AT5G66210 | CALCIUM-DEPENDENT PROTEIN KINASE 2 (CPK2)     | member of Calc    | 5_26456381    | 6.4  | three_prime_UTR   |
| AT5G03190 | CONSERVED PEPTIDE UPSTREAM OPERATOR 1 (CPO1)  | conserved pept    | 5_758085      | 6.4  | promoter          |
| AT4G32290 | na                                            | Core-2/l-branch   | 4_15591661    | 6.4  | promoter          |
| AT5G61450 | na                                            | P-loop containir  | 5_24713421    | 6.4  | promoter          |
| AT1G78250 | na                                            | pre-tRNA; tRNA    | 1_29440961    | 6.4  | intergenic        |
| AT5G07620 | na                                            | Protein kinase s  | 5_2409640     | 6.4  | proximal promoter |
| AT5G07625 | na                                            | pre-tRNA; tRNA    | 5_2409640     | 6.4  | proximal promoter |
| AT5G07630 | na                                            | lipid transporter | 5_2409640     | 6.4  | proximal promoter |
| AT4G13020 | (MHK)                                         | Encodes a merr    | 4_7602850     | 6.39 | promoter          |
| AT1G56210 | na                                            | Heavy metal tra   | 1_21038947    | 6.39 | intergenic        |
| AT4G13010 | na                                            | Oxidoreductase    | 4_7602850     | 6.39 | downstream        |
| AT4G31600 | na                                            | UDP-N-acetylgl    | 4_15314589    | 6.39 | intergenic        |
| AT1G77450 | NAC DOMAIN CONTAINING PROTEIN 32 (NAC32)      | NAC domain co     | 1_29100955    | 6.39 | exon              |
| AT1G67370 | ASYNAPTIC 1 (ASY1)                            | meiotic asynapt   | 1_25244073    | 6.38 | promoter          |
| AT1G75450 | CYTOKININ OXIDASE 5 (CKX5)                    | This gene used    | 1_28319023    | 6.38 | proximal promoter |
| AT3G50660 | DWARF 4 (DWF4)                                | Encodes a 22&     | 3_18814565    | 6.38 | intron            |
| AT3G47470 | LIGHT-HARVESTING CHLOROPHYLL-PROTEIN 1 (LHC1) | Encodes a chl     | 3_17495156    | 6.38 | promoter          |
| AT5G63630 | na                                            | P-loop containir  | 5_25477532    | 6.38 | proximal promoter |
| AT5G63640 | na                                            | ENTH/VHS/GA'      | 5_25477532    | 6.38 | promoter          |
| AT3G03980 | na                                            | NAD(P)-binding    | 3_1034711     | 6.38 | intergenic        |
| AT3G03990 | na                                            | alpha/beta-Hydr   | 3_1034711     | 6.38 | three_prime_UTR   |
| AT3G04000 | na                                            | ChiADR is an al   | 3_1034711     | 6.38 | proximal promoter |
| AT4G23490 | na                                            | Protein of unknc  | 4_12252448    | 6.38 | intron            |
| AT2G23520 | na                                            | Pyridoxal phosp   | 2_10017265    | 6.38 | promoter          |
| AT3G53260 | PHENYLALANINE AMMONIA-LYASE 2 (PAL2)          | Encodes phenyl    | 3_19747076    | 6.38 | promoter          |
| AT2G28930 | PROTEIN KINASE 1B (PK1B)                      | protein kinase    | 1_2_12424319  | 6.38 | intron            |
| AT3G05880 | RARE-COLD-INDUCIBLE 2A (RC12A)                | Induced by low    | 3_1757473     | 6.38 | proximal promoter |
| AT3G05890 | RARE-COLD-INDUCIBLE 2B (RC12B)                | RARE-COLD-IN      | 3_1757473     | 6.38 | downstream        |
| AT5G47220 | ETHYLENE RESPONSIVE ELEMENT BINDING 1 (EREB1) | Encodes a merr    | 5_19173008    | 6.37 | promoter          |
| AT5G43150 | na                                            | unknown proteir   | 5_17323907    | 6.37 | proximal promoter |
| AT5G47210 | na                                            | Hyaluronan / mf   | 5_19173008    | 6.37 | proximal promoter |
| AT1G10150 | na                                            | Carbohydrate-b    | 1_3324589     | 6.37 | proximal promoter |

|           |                                     |                   |            |      |                   |
|-----------|-------------------------------------|-------------------|------------|------|-------------------|
| AT5G03760 | (ATCSLA09)                          | encodes a beta-   | 5_987819   | 6.36 | intron            |
| AT5G16590 | (LRR1)                              | Leucine-rich rep  | 5_5430271  | 6.36 | proximal promoter |
| AT5G66680 | DEFECTIVE GLYCOSYLATION (DGL1)      | Encodes a prot    | 5_26617063 | 6.36 | intergenic        |
| AT2G27500 | na                                  | Glycosyl hydroli  | 2_11754863 | 6.36 | proximal promoter |
| AT4G31510 | na                                  | unknown proteir   | 4_15277636 | 6.36 | promoter          |
| AT5G66675 | na                                  | Protein of unknc  | 5_26617063 | 6.36 | promoter          |
| AT4G36670 | POLYOL/MONOSACCHARIDE TRANSPC       | Major facilitator | 4_17290183 | 6.36 | proximal promoter |
| AT1G74160 | TON1 RECRUITING MOTIF 4 (TRM4)      | unknown proteir   | 1_27885548 | 6.36 | proximal promoter |
| AT2G41225 | na                                  | unknown proteir   | 2_17189286 | 6.35 | intergenic        |
| AT1G21540 | na                                  | AMP-dependen      | 1_7551952  | 6.35 | proximal promoter |
| AT2G44070 | na                                  | NagB/RpiA/CoA     | 2_18234505 | 6.34 | proximal promoter |
| AT3G52110 | na                                  | unknown proteir   | 3_19325836 | 6.34 | promoter          |
| AT1G02110 | na                                  | Protein of unknc  | 1_395593   | 6.34 | downstream        |
| AT1G21810 | na                                  | Plant protein of  | 1_7660017  | 6.34 | proximal promoter |
| AT1G21830 | na                                  | unknown proteir   | 1_7660017  | 6.34 | intergenic        |
| AT2G24600 | na                                  | Ankyrin repeat f  | 2_10454717 | 6.34 | promoter          |
| AT1G01320 | na                                  | Tetratricopeptid  | 1_130680   | 6.34 | promoter          |
| AT1G19835 | na                                  | Plant protein of  | 1_6864946  | 6.34 | intergenic        |
| AT5G08660 | na                                  | Protein of unknc  | 5_2813954  | 6.34 | promoter          |
| AT5G49410 | na                                  | unknown proteir   | 5_20032509 | 6.34 | five_prime_UTR    |
| AT3G25717 | ROTUNDIFOLIA LIKE 16 (RTFL16)       | ROTUNDIFOLIA      | 3_9375767  | 6.34 | promoter          |
| AT2G18700 | TREHALOSE PHOSPHATASE/SYNTHAS       | Encodes an enz    | 2_8107822  | 6.34 | proximal promoter |
| AT1G02120 | VASCULAR ASSOCIATED DEATH1 (VAD     | Encodes VAD1      | 1_395593   | 6.34 | promoter          |
| AT1G67230 | LITTLE NUCLE1 (LINC1)               | Encodes a nucl    | 1_25156365 | 6.33 | promoter          |
| AT3G25715 | na                                  | pre-tRNA; tRNA    | 3_9373307  | 6.33 | proximal promoter |
| AT3G25716 | na                                  | unknown proteir   | 3_9373307  | 6.33 | exon              |
| AT1G18470 | na                                  | Transmembran      | 1_6360272  | 6.33 | promoter          |
| AT5G18030 | na                                  | SAUR-like auxir   | 5_5968153  | 6.33 | promoter          |
| AT4G22920 | NON-YELLOWING 1 (NYE1)              | Similar to the to | 4_12018574 | 6.33 | promoter          |
| AT2G40540 | POTASSIUM TRANSPORTER 2 (KT2)       | putative potassi  | 2_16930837 | 6.33 | promoter          |
| AT2G30980 | SHAGGY-RELATED PROTEIN KINASE D     | Encodes a GSK     | 2_13185904 | 6.33 | five_prime_UTR    |
| AT1G18480 | SHEWENELLA-LIKE PROTEIN PHOSPH      | Calcineurin-like  | 1_6360272  | 6.33 | proximal promoter |
| AT5G18020 | SMALL AUXIN UP RNA 20 (SAUR20)      | SAUR-like auxir   | 5_5968153  | 6.33 | proximal promoter |
| AT2G26260 | 3BETA-HYDROXYSTEROID-DEHYDROG       | Encodes an enz    | 2_11176286 | 6.32 | proximal promoter |
| AT1G69040 | ACT DOMAIN REPEAT 4 (ACR4)          | ACT-domain co     | 1_25955174 | 6.32 | proximal promoter |
| AT3G14180 | ARABIDOPSIS 6B-INTERACTING PROTI    | sequence-speci    | 3_4708962  | 6.32 | promoter          |
| AT3G26290 | CYTOCHROME P450, FAMILY 71, SUBF    | putative cytochr  | 3_9634800  | 6.32 | promoter          |
| AT4G32890 | GATA TRANSCRIPTION FACTOR 9 (GAT    | Encodes a mem     | 4_15877425 | 6.32 | intergenic        |
| AT1G02400 | GIBBERELLIN 2-OXIDASE 6 (GA2OX6)    | Encodes a gibb    | 1_488850   | 6.32 | exon              |
| AT3G07750 | na                                  | 3'-5'-exoribonuc  | 3_2475607  | 6.32 | downstream        |
| AT3G07760 | na                                  | Sterile alpha mc  | 3_2475607  | 6.32 | proximal promoter |
| AT1G07135 | na                                  | glycine-rich prot | 1_2191087  | 6.32 | promoter          |
| AT1G78830 | na                                  | Curculin-like (m  | 1_29638664 | 6.32 | promoter          |
| AT1G64380 | na                                  | encodes a mem     | 1_23890493 | 6.32 | downstream        |
| AT1G67510 | na                                  | Leucine-rich rep  | 1_25297225 | 6.32 | intergenic        |
| AT1G78840 | na                                  | F-box/RNI-like/F  | 1_29638664 | 6.32 | intergenic        |
| AT5G59230 | na                                  | transcription fac | 5_23901201 | 6.32 | promoter          |
| AT2G37710 | RECEPTOR LECTIN KINASE (RLK)        | Induced in resp   | 2_15818132 | 6.32 | proximal promoter |
| AT1G67500 | RECOVERY PROTEIN 3 (REV3)           | Encodes the ca    | 1_25297225 | 6.32 | promoter          |
| AT2G37720 | TRICHOME BIREFRINGENCE-LIKE 15 (T   | Encodes a mem     | 2_15818132 | 6.32 | exon              |
| AT3G17203 | GIBBERELLIN 2-OXIDASE 5 (GA2OX5)    | a pseudogene ii   | 3_5873075  | 6.31 | downstream        |
| AT2G43060 | IL1 BINDING BHLH 1 (IBH1)           | IL1 binding bHL   | 2_17906290 | 6.31 | proximal promoter |
| AT4G36820 | na                                  | Protein of unknc  | 4_17346686 | 6.31 | promoter          |
| AT4G11570 | na                                  | Haloacid dehalc   | 4_7004081  | 6.31 | promoter          |
| AT2G29670 | na                                  | Tetratricopeptid  | 2_12685209 | 6.31 | promoter          |
| AT1G03220 | na                                  | Eukaryotic aspa   | 1_785746   | 6.31 | proximal promoter |
| AT2G24240 | na                                  | BTB/POZ doma      | 2_10310494 | 6.31 | promoter          |
| AT4G17810 | na                                  | C2H2 and C2H1     | 4_9908728  | 6.31 | intergenic        |
| AT5G62880 | RAC-LIKE 10 (RAC10)                 | A member of Rf    | 5_25236956 | 6.31 | promoter          |
| AT3G17205 | UBIQUITIN PROTEIN LIGASE 6 (UPL6)   | ubiquitin protei  | 3_5873075  | 6.31 | promoter          |
| AT5G64660 | CYS, MET, PRO, AND GLY PROTEIN 2 (C | CYS, MET, PRC     | 5_25843980 | 6.3  | proximal promoter |
| AT1G64470 | na                                  | Ubiquitin-like su | 1_23947656 | 6.3  | proximal promoter |
| AT1G67590 | na                                  | Remorin family    | 1_25335129 | 6.3  | promoter          |
| AT4G29950 | na                                  | Ypt/Rab-GAP di    | 4_14656252 | 6.3  | proximal promoter |
| AT1G69910 | na                                  | Protein kinase s  | 1_26328740 | 6.3  | proximal promoter |
| AT4G29940 | PATHOGENESIS RELATED HOMEODOM       | Homeodomain f     | 4_14656252 | 6.3  | proximal promoter |
| AT1G67960 | POLLEN DEFECTIVE IN GUIDANCE 1 (P   | POD1 is involve   | 1_25484360 | 6.3  | promoter          |
| AT4G37450 | ARABINOGALACTAN PROTEIN 18 (AGF     | AGP18 is a lysir  | 4_17605334 | 6.29 | intergenic        |
| AT1G14620 | DECOY (DECOY)                       | DECOY (DECO       | 1_5018092  | 6.29 | proximal promoter |
| AT5G67370 | na                                  | Protein of unknc  | 5_26879717 | 6.29 | promoter          |
| AT2G26110 | na                                  | Protein of unknc  | 2_11122247 | 6.29 | downstream        |
| AT4G25870 | na                                  | Core-2/l-branch   | 4_13151961 | 6.29 | intron            |
| AT1G14430 | na                                  | glyoxal oxidase-  | 1_4934582  | 6.29 | exon              |
| AT4G37445 | na                                  | BEST Arabidop:    | 4_17605334 | 6.29 | promoter          |
| AT5G25350 | EIN3-BINDING F BOX PROTEIN 2 (EBF2) | Arabidopsis tha   | 5_8797111  | 6.28 | promoter          |
| AT2G35620 | FEI 2 (FEI2)                        | Encodes a plasi   | 2_14965511 | 6.28 | promoter          |
| AT1G78680 | GAMMA-GLUTAMYL HYDROLASE 2 (GG      | The Arabidopsis   | 1_29593739 | 6.28 | promoter          |
| AT1G78670 | GAMMA-GLUTAMYL HYDROLASE 3 (GG      | gamma-glutamy     | 1_29593739 | 6.28 | intergenic        |
| AT3G25510 | na                                  | disease resistar  | 3_9268999  | 6.28 | promoter          |
| AT5G01790 | na                                  | unknown proteir   | 5_306384   | 6.28 | proximal promoter |
| AT3G21055 | PHOTOSYSTEM II SUBUNIT T (PSBTN)    | Encodes photos    | 3_7377278  | 6.28 | promoter          |
| AT3G21060 | RBBP5 LIKE (RBL)                    | Encodes a struc   | 3_7377278  | 6.28 | promoter          |
| AT3G25520 | RIBOSOMAL PROTEIN L5 (ATL5)         | Encodes riboso    | 3_9268999  | 6.28 | intergenic        |
| AT2G45070 | SUPPRESSORS OF SECRETION-DEFEC      | Sec61 Beta Sut    | 2_18589591 | 6.28 | proximal promoter |
| AT2G46400 | WRKY DNA-BINDING PROTEIN 46 (WRK    | member of WR1     | 2_19045469 | 6.28 | proximal promoter |
| AT4G35600 | CAST AWAY (CST)                     | Encodes a rece    | 4_16895299 | 6.27 | proximal promoter |
| AT1G16300 | GLYCERALDEHYDE-3-PHOSPHATE DEI      | Encodes one of    | 1_5574137  | 6.27 | promoter          |
| AT1G53580 | GLYOXALASE II 3 (GLY3)              | Mononuclear Fe    | 1_19993408 | 6.27 | promoter          |
| AT1G03030 | na                                  | P-loop containir  | 1_701386   | 6.27 | promoter          |
| AT5G55180 | na                                  | O-Glycosyl hydr   | 5_22390165 | 6.27 | exon              |
| AT1G20310 | na                                  | unknown proteir   | 1_7032134  | 6.27 | promoter          |
| AT2G41640 | na                                  | Glycosyltransfei  | 2_17359938 | 6.27 | proximal promoter |
| AT2G22010 | RELATED TO KPC1 (RKP)               | Encodes a prot    | 2_9370652  | 6.27 | proximal promoter |
| AT1G09210 | CALRETICULIN 1B (CRT1b)             | Encodes one of    | 1_2976969  | 6.26 | promoter          |

|           |                                   |                   |              |      |                   |
|-----------|-----------------------------------|-------------------|--------------|------|-------------------|
| AT4G27430 | COP1-INTERACTING PROTEIN 7 (CIP7) | Positive regulat  | 4_13717716   | 6.26 | proximal promoter |
| AT4G17840 | na                                | FUNCTIONS IN 4_   | 9920526      | 6.26 | promoter          |
| AT4G12300 | CYTOCHROME P450, FAMILY 706, SUBf | member of CYP 4_  | 7309973      | 6.25 | promoter          |
| AT4G34100 | ECERIFERUM 9 (CER9)               | Encodes a prot    | 4_16330354   | 6.25 | promoter          |
| AT2G39700 | EXPANSIN A4 (EXPA4)               | putative expans   | 2_16547004   | 6.25 | proximal promoter |
| AT5G66568 | na                                | pre-tRNA; tRNA    | 5_26568496   | 6.25 | downstream        |
| AT2G22620 | na                                | Rhamnogalactu     | 2_9606901    | 6.25 | intron            |
| AT5G01790 | na                                | unknown proteir   | 5_304291     | 6.25 | intergenic        |
| AT4G34090 | na                                | unknown proteir   | 4_16330354   | 6.25 | promoter          |
| AT5G01780 | na                                | 2-oxoglutarate-<  | 5_304291     | 6.25 | promoter          |
| AT5G66570 | PS II OXYGEN-EVOLVING COMPLEX 1 ( | Encodes a prot    | 5_26568496   | 6.25 | promoter          |
| AT1G23400 | (CAF2)                            | Promotes the sr   | 1_8311841    | 6.24 | intergenic        |
| AT1G76650 | CALMODULIN-LIKE 38 (CML38)        | calmodulin-like   | : 1_28767757 | 6.24 | intron            |
| AT2G41140 | CDPK-RELATED KINASE 1 (CRK1)      | Encodes CDPK      | 2_17147873   | 6.24 | proximal promoter |
| AT1G68552 | CONSERVED PEPTIDE UPSTREAM OPE    | Upstream open     | 1_25728231   | 6.24 | proximal promoter |
| AT1G68550 | CYTOKININ RESPONSE FACTOR 10 (CF  | encodes a mem     | 1_25728231   | 6.24 | proximal promoter |
| AT2G39860 | na                                | pre-tRNA; tRNA    | 2_16640273   | 6.24 | promoter          |
| AT1G78310 | na                                | VQ motif-contain  | 1_29466052   | 6.24 | proximal promoter |
| AT1G23390 | na                                | Kelch repeat-co   | 1_8311841    | 6.24 | proximal promoter |
| AT2G21120 | na                                | Protein of unkn   | 2_9054655    | 6.24 | promoter          |
| AT2G21130 | na                                | Cyclophilin-like  | : 2_9054655  | 6.24 | intergenic        |
| AT2G37580 | na                                | RING/U-box su     | 2_15763768   | 6.24 | proximal promoter |
| AT2G37585 | na                                | Core-2/l-branch   | 2_15763768   | 6.24 | proximal promoter |
| AT3G13686 | na                                | unknown proteir   | 3_4484227    | 6.24 | downstream        |
| AT3G06868 | na                                | unknown proteir   | 3_2169983    | 6.24 | intergenic        |
| AT3G06870 | na                                | proline-rich fami | 3_2169983    | 6.24 | proximal promoter |
| AT3G06880 | na                                | Transducin/WD     | 3_2169983    | 6.24 | intron            |
| AT4G34500 | na                                | Protein kinase s  | 4_16490083   | 6.24 | intron            |
| AT2G37570 | SODIUM- AND LITHIUM-TOLERANT 1 (S | encodes a prote   | 2_15763768   | 6.24 | promoter          |
| AT1G60950 | (FED A)                           | encodes a majo    | 1_22444361   | 6.23 | promoter          |
| AT1G03090 | (MCCA)                            | MCCA is the bic   | 1_739534     | 6.23 | promoter          |
| AT2G47940 | DEGP PROTEASE 2 (DEGP2)           | Encodes DegP?     | 2_19622344   | 6.23 | promoter          |
| AT5G16260 | EARLY FLOWERING 9 (ELF9)          | Encodes a RNA     | 5_5311156    | 6.23 | promoter          |
| AT2G01860 | EMBRYO DEFECTIVE 975 (EMB975)     | EMBRYO DEFE       | 2_387879     | 6.23 | promoter          |
| AT2G01850 | ENDOXYLOGLUCCAN TRANSFERASE A3    | EXGT-A3 has h     | 2_387879     | 6.23 | intergenic        |
| AT1G60960 | IRON REGULATED TRANSPORTER 3 (IF  | Encodes a plasi   | 1_22444361   | 6.23 | intergenic        |
| AT5G43620 | na                                | Pre-mRNA clea     | 5_17522495   | 6.23 | promoter          |
| AT1G03100 | na                                | Pentatricopeptic  | 1_739534     | 6.23 | intergenic        |
| AT3G23171 | na                                | unknown proteir   | 3_8269782    | 6.23 | exon              |
| AT3G23310 | na                                | AGC (cAMP-de      | 3_8337420    | 6.23 | proximal promoter |
| AT5G16250 | na                                | unknown proteir   | 5_5311156    | 6.23 | promoter          |
| AT1G62950 | na                                | leucine-rich rep  | 1_23314910   | 6.22 | promoter          |
| AT2G25430 | na                                | epsin N-termina   | 2_10825203   | 6.22 | intergenic        |
| AT1G78230 | na                                | Outer arm dyne    | 1_29430229   | 6.22 | exon              |
| AT3G60318 | na                                | This gene encod   | 3_22293181   | 6.22 | intergenic        |
| AT3G60320 | na                                | Protein of unkn   | 3_22293181   | 6.22 | intron            |
| AT4G36500 | na                                | unknown proteir   | 4_17226743   | 6.22 | promoter          |
| AT5G01070 | na                                | RING/FYVE/PH      | 5_27587      | 6.22 | proximal promoter |
| AT5G01075 | na                                | Glycosyl hydroli  | 5_27587      | 6.22 | promoter          |
| AT2G25440 | RECEPTOR LIKE PROTEIN 20 (RLP20)  | receptor like prc | 2_10825203   | 6.22 | proximal promoter |
| AT5G46410 | SCP1-LIKE SMALL PHOSPHATASE 4 (S  | Encodes a SCP     | 5_18825015   | 6.22 | promoter          |
| AT4G03070 | (AOP1)                            | Encodes a poss    | 4_1358274    | 6.21 | promoter          |
| AT1G76890 | (GT2)                             | encodes a plant   | 1_28876273   | 6.21 | proximal promoter |
| AT2G42000 | ARABIDOPSIS THALIANA METALLOTHI   | AtMT4a is a me    | 2_17530853   | 6.21 | promoter          |
| AT1G05670 | na                                | Pentatricopeptic  | 1_1699459    | 6.21 | exon              |
| AT1G78400 | na                                | Pectin lyase-like | 1_29497892   | 6.21 | intergenic        |
| AT5G59385 | na                                | pre-tRNA; tRNA    | 5_23954122   | 6.21 | downstream        |
| AT3G61070 | PEROXIN 11E (PEX11E)              | member of the r   | 3_22606932   | 6.21 | promoter          |
| AT5G25610 | RESPONSIVE TO DESSICATION 22 (RD  | responsive to di  | 5_8918677    | 6.21 | proximal promoter |
| AT3G09690 | na                                | alpha/beta-Hydr   | 3_2971653    | 6.2  | promoter          |
| AT1G05350 | na                                | NAD(P)-binding    | 1_1564330    | 6.2  | promoter          |
| AT3G54420 | na                                | unknown proteir   | 3_20548518   | 6.2  | exon              |
| AT5G48500 | na                                | unknown proteir   | 5_19652420   | 6.2  | proximal promoter |
| AT4G01120 | G-BOX BINDING FACTOR 2 (GBF2)     | bZIP (basic leuc  | 4_484969     | 6.19 | promoter          |
| AT3G02885 | GAST1 PROTEIN HOMOLOG 5 (GAS45)   | GAS45, is invol   | 3_633962     | 6.19 | intergenic        |
| AT1G33240 | GT-2-LIKE 1 (GTL1)                | Encodes a plan    | 1_12051202   | 6.19 | intergenic        |
| AT3G02875 | IAA-LEUCINE RESISTANT 1 (ILR1)    | Hydrolyzes amii   | 3_633962     | 6.19 | three_prime_UTR   |
| AT3G02880 | na                                | Leucine-rich rep  | 3_633962     | 6.19 | proximal promoter |
| AT4G01130 | na                                | GDSL-like Lipas   | 4_484969     | 6.19 | proximal promoter |
| AT4G37760 | SQUALENE EPOXIDASE 3 (SQE3)       | squalene epoxi    | 4_17743339   | 6.19 | proximal promoter |
| AT2G30590 | WRKY DNA-BINDING PROTEIN 21 (WRK  | Encodes WRKY      | 2_13033508   | 6.19 | five_prime_UTR    |
| AT5G15970 | (KIN2)                            | Encodes a gene    | 5_5211766    | 6.18 | promoter          |
| AT1G56340 | CALRETICULIN 1A (CRT1a)           | Encodes one of    | 1_21092787   | 6.18 | promoter          |
| AT1G70895 | CLAVATA3/ESR-RELATED 17 (CLE17)   | Member of a lar   | 1_26727661   | 6.18 | promoter          |
| AT1G03800 | ERF DOMAIN PROTEIN 10 (ERF10)     | encodes a mem     | 1_958117     | 6.18 | promoter          |
| AT1G70890 | MLP-LIKE PROTEIN 43 (MLP43)       | MLP-like proteir  | 1_26727661   | 6.18 | proximal promoter |
| AT1G56345 | na                                | Pseudouridine ε   | 1_21092787   | 6.18 | downstream        |
| AT3G45230 | na                                | hydroxyproline-ι  | 3_16568844   | 6.18 | promoter          |
| AT1G32930 | na                                | Galactosyltrans   | 1_11934793   | 6.18 | promoter          |
| AT1G21730 | na                                | P-loop containir  | 1_7629628    | 6.18 | promoter          |
| AT1G70885 | na                                | pseudogene, sir   | 1_26727661   | 6.18 | proximal promoter |
| AT2G46870 | NGATHA1 (NGA1)                    | NGATHA1 (NG_2_    | 19258004     | 6.18 | proximal promoter |
| AT1G15110 | PHOSPHATIDYL SERINE SYNTHASE 1 (F | PSS1 encodes      | 1_5199089    | 6.18 | five_prime_UTR    |
| AT5G38410 | RUBISCO SMALL SUBUNIT 3B (RBCS3B  | Encodes a mem     | 5_15378522   | 6.18 | promoter          |
| AT1G08250 | AROGENATE DEHYDRATASE 6 (ADT6)    | Encodes a plasi   | 1_2590398    | 6.17 | promoter          |
| AT3G06860 | MULTIFUNCTIONAL PROTEIN 2 (MFP2)  | Encodes a multi   | 3_2166496    | 6.17 | downstream        |
| AT5G02220 | na                                | unknown proteir   | 5_442657     | 6.17 | proximal promoter |
| AT5G52070 | na                                | Agenet domain-    | 5_21161269   | 6.17 | promoter          |
| AT3G06868 | na                                | unknown proteir   | 3_2166496    | 6.17 | proximal promoter |
| AT2G21210 | na                                | Putative auxin-r  | 2_9086108    | 6.17 | promoter          |
| AT3G23930 | na                                | unknown proteir   | 3_8646607    | 6.17 | promoter          |
| AT5G10150 | na                                | FUNCTIONS IN      | 5_3184090    | 6.17 | promoter          |
| AT2G27840 | (HDT4)                            | Belongs to the r  | 2_11860547   | 6.16 | proximal promoter |
| AT3G61830 | AUXIN RESPONSE FACTOR 18 (ARF18)  | auxin response    | 3_22887283   | 6.16 | proximal promoter |

|           |                                    |                   |              |      |                   |
|-----------|------------------------------------|-------------------|--------------|------|-------------------|
| AT5G45820 | CBL-INTERACTING PROTEIN KINASE 2C  | Encodes a CBL     | 5_18589648   | 6.16 | proximal promoter |
| AT5G45830 | DELAY OF GERMINATION 1 (DOG1)      | Encodes DOG1      | 5_18589648   | 6.16 | three_prime_UTR   |
| AT1G03850 | GLUTAREDOXIN 13 (GRXS13)           | Encodes glutare   | 1_979053     | 6.16 | proximal promoter |
| AT2G45910 | na                                 | U-box domain-c    | 2_18894006   | 6.16 | promoter          |
| AT5G58090 | na                                 | O-Glycosyl hydr   | 5_23507389   | 6.16 | promoter          |
| AT2G05810 | na                                 | ARM repeat sur    | 2_2215085    | 6.16 | intron            |
| AT2G05812 | na                                 | Potential natura  | 2_2215085    | 6.16 | promoter          |
| AT2G27830 | na                                 | unknown protei    | 2_11860547   | 6.16 | five_prime_UTR    |
| AT3G61826 | na                                 | This gene encod   | 3_22887283   | 6.16 | proximal promoter |
| AT3G61827 | na                                 | This gene encod   | 3_22887283   | 6.16 | promoter          |
| AT3G61829 | na                                 | unknown protei    | 3_22887283   | 6.16 | exon              |
| AT1G03860 | PROHIBITIN 2 (PHB2)                | prohibitin 2      | 1_979053     | 6.16 | intergenic        |
| AT2G33050 | RECEPTOR LIKE PROTEIN 26 (RLP26)   | receptor like prc | 2_14025439   | 6.16 | intergenic        |
| AT2G33060 | RECEPTOR LIKE PROTEIN 27 (RLP27)   | receptor like prc | 2_14025439   | 6.16 | promoter          |
| AT2G02180 | TOBAMOVIRUS MULTIPLICATION PROT    | Necessary for tl  | 2_560715     | 6.16 | promoter          |
| AT1G63180 | UDP-D-GLUCOSE/UDP-D-GALACTOSE      | Encodes a prot    | 1_23429509   | 6.16 | five_prime_UTR    |
| AT1G32200 | (ATS1)                             | Encodes a chl     | 1_11605806   | 6.15 | proximal promoter |
| AT1G32210 | DEFENDER AGAINST APOPTOTIC DEAT    | Encodes protei    | 1_11605806   | 6.15 | downstream        |
| AT5G07920 | DIACYLGLYCEROL KINASE1 (DGK1)      | diacylglycerol ki | 5_2529512    | 6.15 | promoter          |
| AT4G13340 | LEUCINE-RICH REPEAT/EXTENSIN 3 (LI | Leucine-rich re   | 4_7757155    | 6.15 | proximal promoter |
| AT3G23530 | na                                 | Cyclopropane-fi   | 3_8437785    | 6.15 | intron            |
| AT3G47960 | na                                 | Major facilitator | 3_17700889   | 6.15 | promoter          |
| AT5G11000 | na                                 | Plant protein of  | 5_3478506    | 6.15 | intergenic        |
| AT4G37820 | na                                 | unknown protei    | 4_17784984   | 6.15 | promoter          |
| AT5G10990 | na                                 | SAUR-like auxi    | 5_3478506    | 6.15 | intergenic        |
| AT5G04410 | NAC DOMAIN CONTAINING PROTEIN 2    | NAC family mer    | 5_1243720    | 6.15 | promoter          |
| AT5G03520 | RAB GTPASE HOMOLOG 8C (RAB8C)      | RAB GTPase h      | 5_882899     | 6.15 | proximal promoter |
| AT4G00370 | (ANR2)                             | Encodes an ino    | 4_166412     | 6.14 | promoter          |
| AT5G62000 | AUXIN RESPONSE FACTOR 2 (ARF2)     | Encodes an aux    | 5_24916026   | 6.14 | intergenic        |
| AT5G62020 | HEAT SHOCK TRANSCRIPTION FACTO     | member of Heat    | 5_24916026   | 6.14 | promoter          |
| AT3G18250 | na                                 | Putative membr    | 3_6259175    | 6.14 | proximal promoter |
| AT4G33040 | na                                 | Thioredoxin sup   | 4_15941492   | 6.14 | promoter          |
| AT1G02620 | na                                 | Ras-related sm    | 1_557156     | 6.14 | intron            |
| AT1G02610 | na                                 | RING/FYVE/PH      | 1_557156     | 6.14 | proximal promoter |
| AT3G19680 | na                                 | Protein of unkn   | 3_6842105    | 6.14 | exon              |
| AT3G19690 | na                                 | CAP (Cysteine-    | 3_6842105    | 6.14 | downstream        |
| AT2G47670 | na                                 | Plant invertase/  | 2_19545633   | 6.14 | proximal promoter |
| AT5G42650 | ALLENE OXIDE SYNTHASE (AOS)        | Encodes a merr    | 5_17098358   | 6.13 | exon              |
| AT2G40840 | DISPROPORTIONATING ENZYME 2 (DPI   | Encodes a cyto    | 2_17044943   | 6.13 | promoter          |
| AT1G07110 | FRUCTOSE-2,6-BISPHOSPHATASE (F2F   | Encodes the bif   | 1_2177631    | 6.13 | intergenic        |
| AT2G15890 | MATERNAL EFFECT EMBRYO ARREST      | maternal effect   | 2_6922176    | 6.13 | promoter          |
| AT5G65300 | na                                 | unknown protei    | 5_26095873   | 6.13 | promoter          |
| AT1G07100 | na                                 | pre-tRNA; tRNA    | 1_2177631    | 6.13 | promoter          |
| AT2G15880 | na                                 | Leucine-rich re   | 2_6922176    | 6.13 | proximal promoter |
| AT2G45040 | na                                 | Matrixin family   | 3_2_18579190 | 6.13 | intergenic        |
| AT3G09440 | na                                 | Heat shock prot   | 3_2906644    | 6.13 | proximal promoter |
| AT4G34950 | na                                 | Major facilitator | 4_16643175   | 6.13 | intron            |
| AT2G40830 | RING-H2 FINGER C1A (RHC1A)         | Encodes a puta    | 2_17044943   | 6.13 | downstream        |
| AT4G16890 | SUPPRESSOR OF NPR1-1, CONSTITUT    | Encodes a Toll    | 1_4_9505947  | 6.13 | promoter          |
| AT5G59430 | TELOMERIC REPEAT BINDING PROTEI    | Encodes a telor   | 5_23967241   | 6.13 | promoter          |
| AT3G48350 | CYSTEINE ENDOPEPTIDASE 3 (CEP3)    | Cysteine protei   | 3_17905259   | 6.12 | promoter          |
| AT2G40610 | EXPANSIN A8 (EXPA8)                | member of Alph    | 2_16952444   | 6.12 | proximal promoter |
| AT1G76610 | na                                 | Protein of unkn   | 1_28752400   | 6.12 | intergenic        |
| AT5G44050 | na                                 | MATE efflux fan   | 5_17723581   | 6.12 | intron            |
| AT1G80530 | na                                 | Major facilitator | 1_30281116   | 6.12 | proximal promoter |
| AT4G38660 | na                                 | Pathogenesis-rr   | 4_18068542   | 6.12 | promoter          |
| AT4G38670 | na                                 | Pathogenesis-rr   | 4_18068542   | 6.12 | intergenic        |
| AT5G54620 | na                                 | Ankyrin repeat    | 5_22191319   | 6.12 | proximal promoter |
| AT1G73080 | PEP1 RECEPTOR 1 (PEPR1)            | Encodes a leuci   | 1_27484275   | 6.12 | promoter          |
| AT1G76680 | 12-OXOPHYTODIENOATE REDUCTASE      | Encodes a merr    | 1_28776829   | 6.11 | promoter          |
| AT2G38400 | ALANINE:GLYOXYLATE AMINOTRANSF     | alanine:glyoxyla  | 2_16082335   | 6.11 | proximal promoter |
| AT2G28350 | AUXIN RESPONSE FACTOR 10 (ARF10)   | Involved in root  | 2_12109724   | 6.11 | intergenic        |
| AT3G23250 | MYB DOMAIN PROTEIN 15 (MYB15)      | Member of the f   | 3_8309111    | 6.11 | promoter          |
| AT1G35560 | na                                 | TCP family tran   | 1_13115674   | 6.11 | downstream        |
| AT1G76670 | na                                 | Nucleotide-sug    | 1_28776829   | 6.11 | proximal promoter |
| AT3G28430 | na                                 | unknown protei    | 3_10662769   | 6.11 | promoter          |
| AT3G26530 | na                                 | transposable el   | 3_9739462    | 6.11 | intergenic        |
| AT4G02410 | na                                 | Concanavalin A    | 4_1062285    | 6.11 | promoter          |
| AT1G09950 | RESPONSE TO ABA AND SALT 1 (RAS1   | RESPONSE TC       | 1_3240346    | 6.11 | intergenic        |
| AT5G40390 | SEED IMBIBITION 1-LIKE (SIP1)      | Encodes a prot    | 5_16163367   | 6.11 | intron            |
| AT4G30960 | SOS3-INTERACTING PROTEIN 3 (SIP3)  | Encodes CBL-ir    | 4_15066919   | 6.11 | promoter          |
| AT5G07990 | TRANSPARENT TESTA 7 (TT7)          | Required for fla  | 5_2562146    | 6.11 | exon              |
| AT3G09390 | METALLOTHIONEIN 2A (MT2A)          | metallothionein,  | 3_2890380    | 6.1  | promoter          |
| AT1G77060 | na                                 | Phosphoenolpy     | 1_28953596   | 6.1  | promoter          |
| AT2G24360 | na                                 | Protein kinase    | 5_2_10367029 | 6.1  | promoter          |
| AT2G18630 | na                                 | Protein of unkn   | 2_8079905    | 6.1  | proximal promoter |
| AT2G30880 | (SWAP70)                           | Pleckstrin homc   | 2_13141346   | 6.09 | intergenic        |
| AT3G23220 | ETHYLENE AND SALT INDUCIBLE 1 (ES  | encodes a mem     | 3_8287579    | 6.09 | promoter          |
| AT2G30870 | GLUTATHIONE S-TRANSFERASE PHI 1    | early dehydratic  | 2_13141346   | 6.09 | promoter          |
| AT2G30860 | GLUTATHIONE S-TRANSFERASE PHI 9    | Encodes glutath   | 2_13141346   | 6.09 | intergenic        |
| AT3G13810 | INDETERMINATE(ID)-DOMAIN 11 (IDD11 | indeterminate(I   | 3_4547893    | 6.09 | intergenic        |
| AT1G51660 | MITOGEN-ACTIVATED PROTEIN KINASE   | Encodes a mito    | 1_19154230   | 6.09 | promoter          |
| AT1G47970 | na                                 | unknown protei    | 1_17687037   | 6.09 | promoter          |
| AT1G51650 | na                                 | ATP synthase      | 1_19154230   | 6.09 | intergenic        |
| AT4G26480 | na                                 | RNA-binding Kf    | 4_13376140   | 6.09 | promoter          |
| AT3G13820 | na                                 | F-box and asso    | 3_4547893    | 6.09 | proximal promoter |
| AT2G46810 | na                                 | basic helix-loop  | 2_19242469   | 6.09 | three_prime_UTR   |
| AT5G17840 | na                                 | DnaJ/Hsp40 cy     | 5_5897699    | 6.09 | proximal promoter |
| AT5G54200 | na                                 | Transducin/WD     | 5_21999089   | 6.09 | proximal promoter |
| AT5G61120 | na                                 | BEST Arabidop     | 5_24585807   | 6.09 | promoter          |
| AT2G46820 | PHOTOSYSTEM I P SUBUNIT (PSI-P)    | Encodes the P     | 2_19242469   | 6.09 | proximal promoter |
| AT3G23810 | S-ADENOSYL-L-HOMOCYSTEINE (SAH)    | S-adenosyl-l-ho   | 3_8595488    | 6.09 | intergenic        |
| AT2G42580 | TETRAATRICOPETIDE-REPEAT THIORE    | Encodes a merr    | 2_17726807   | 6.09 | proximal promoter |
| AT2G32800 | (AP4.3A)                           | AP4.3A; FUNC      | 2_13913141   | 6.08 | intergenic        |

|           |                                                      |                              |      |                   |
|-----------|------------------------------------------------------|------------------------------|------|-------------------|
| AT3G54900 | CAX INTERACTING PROTEIN 1 (CXIP1)                    | A.thaliana PICC 3_20341147   | 6.08 | intergenic        |
| AT3G22968 | CONSERVED PEPTIDE UPSTREAM OPEN READING FRAME        | Upstream open 3_8151855      | 6.08 | promoter          |
| AT1G75450 | CYTOKININ OXIDASE 5 (CKX5)                           | This gene used 1_28315868    | 6.08 | intron            |
| AT5G08280 | HYDROXYMETHYLBILANE SYNTHASE (HMB-SYN)               | Encodes a prot 5_2665858     | 6.08 | promoter          |
| AT3G22970 | na                                                   | Protein of unkn 3_8151855    | 6.08 | promoter          |
| AT5G10745 | na                                                   | unknown proteir 5_3400239    | 6.08 | intergenic        |
| AT5G10750 | na                                                   | Protein of unkn 5_3400239    | 6.08 | downstream        |
| AT5G10760 | na                                                   | Eukaryotic aspa 5_3400239    | 6.08 | downstream        |
| AT3G54890 | PHOTOSYSTEM I LIGHT HARVESTING COMPLEX 1             | Encodes a com 3_20341147     | 6.08 | promoter          |
| AT1G59900 | PYRUVATE DEHYDROGENASE COMPLEX 1                     | encodes the e1 1_22051266    | 6.08 | promoter          |
| AT1G59890 | SIN3-LIKE 5 (SNL5)                                   | SIN3-like 5 (SNL) 1_22051266 | 6.08 | downstream        |
| AT1G75440 | UBIQUITIN-CONJUGATING ENZYME 16                      | ubiquitin-conjug 1_28315868  | 6.08 | intergenic        |
| AT5G08290 | YELLOW-LEAF-SPECIFIC GENE 8 (YLS8)                   | Encodes Dim1 1_5_2665858     | 6.08 | promoter          |
| AT4G23750 | CYTOKININ RESPONSE FACTOR 2 (CRF2)                   | encodes a mem 4_12375297     | 6.07 | proximal promoter |
| AT2G29450 | GLUTATHIONE S-TRANSFERASE TAU 1                      | Encodes a mem 2_12624640     | 6.07 | three_prime_UTR   |
| AT5G56240 | na                                                   | INVOLVED IN: 15_22765304     | 6.07 | proximal promoter |
| AT2G29452 | na                                                   | unknown proteir 2_12624640   | 6.07 | intergenic        |
| AT2G29390 | STEROL 4-ALPHA-METHYL-OXIDASE 2                      | Encodes a sterc 2_12612589   | 6.07 | intron            |
| AT5G42100 | BETA-1,3-GLUCANASE_PUTATIVE (BG1)                    | encodes a plasr 5_16829653   | 6.06 | intron            |
| AT1G75380 | BIFUNCTIONAL NUCLEASE IN BASAL DISEASE RESISTANCE 1  | Encodes a nucl 1_28285268    | 6.06 | proximal promoter |
| AT1G54115 | CATION CALCIUM EXCHANGER 4 (CCX4)                    | Involved in catic 1_20204264 | 6.06 | downstream        |
| AT5G43060 | RESPONSIVE TO DEHYDRATION 21B (RD21B)                | Granulin repeat 5_17272824   | 6.06 | proximal promoter |
| AT3G08762 | na                                                   | unknown proteir 3_2662000    | 6.06 | exon              |
| AT1G45688 | na                                                   | unknown proteir 1_17192972   | 6.06 | three_prime_UTR   |
| AT1G45760 | na                                                   | transposable elk 1_17192972  | 6.06 | proximal promoter |
| AT3G63460 | na                                                   | transducin famil 3_23437624  | 6.06 | promoter          |
| AT2G29628 | na                                                   | unknown proteir 2_12666823   | 6.06 | downstream        |
| AT2G14080 | na                                                   | Disease resistat 2_5924214   | 6.06 | proximal promoter |
| AT2G40460 | na                                                   | Major facilitator 2_16895758 | 6.06 | proximal promoter |
| AT4G03420 | na                                                   | Protein of unkn 4_1514807    | 6.06 | intergenic        |
| AT5G59050 | na                                                   | unknown proteir 5_23840764   | 6.06 | intron            |
| AT5G10310 | na                                                   | unknown proteir 5_3242338    | 6.06 | promoter          |
| AT5G10320 | na                                                   | unknown proteir 5_3242338    | 6.06 | intergenic        |
| AT2G29630 | THIAMINC (THIC)                                      | Encodes a prote 2_12666823   | 6.06 | promoter          |
| AT4G11660 | (AT-HSFB2B)                                          | member of Heal 4_7042490     | 6.05 | promoter          |
| AT2G38040 | ACETYL CO-ENZYME A CARBOXYLASE 1                     | encodes the cai 2_15921464   | 6.05 | intergenic        |
| AT3G44720 | AROGENATE DEHYDRATASE 4 (ADT4)                       | Encodes a plas 3_16273004    | 6.05 | exon              |
| AT1G15950 | CINNAMOYL COA REDUCTASE 1 (CCR1)                     | Encodes a cinn 1_5479893     | 6.05 | exon              |
| AT2G38050 | DE-ETIOLATED 2 (DET2)                                | Similar to mamn 2_15921464   | 6.05 | exon              |
| AT5G22500 | FATTY ACID REDUCTASE 1 (FAR1)                        | Encodes a mem 5_7466700      | 6.05 | intergenic        |
| AT3G53800 | FES1B (Fes1B)                                        | Encodes one of 3_19930790    | 6.05 | promoter          |
| AT4G36730 | G-BOX BINDING FACTOR 1 (GBF1)                        | member of a ge 4_17312537    | 6.05 | promoter          |
| AT5G59840 | na                                                   | Ras-related sm: 5_24109398   | 6.05 | promoter          |
| AT1G55700 | na                                                   | Cysteine/Histidi 1_20818173  | 6.05 | intergenic        |
| AT3G22560 | na                                                   | Acy-CoA N-acy 3_7997610      | 6.05 | intergenic        |
| AT1G47310 | na                                                   | unknown proteir 1_17342981   | 6.05 | five_prime_UTR    |
| AT2G38060 | PHOSPHATE TRANSPORTER 4:2 (PHT4:2)                   | Encodes an ino 2_15921464    | 6.05 | intergenic        |
| AT4G21960 | (PRXR1)                                              | Encodes AT4g2 4_11650391     | 6.04 | proximal promoter |
| AT5G01370 | ALC-INTERACTING PROTEIN 1 (AC1)                      | Nuclear protein 5_154949     | 6.04 | intergenic        |
| AT1G73830 | BR ENHANCED EXPRESSION 3 (BEE3)                      | BR enhanced e: 1_27762784    | 6.04 | intergenic        |
| AT3G18550 | BRANCHED 1 (BRC1)                                    | Encodes a TCP 3_6381248      | 6.04 | proximal promoter |
| AT2G22125 | CELLULOSE SYNTHASE-INTERACTIVE 1                     | Encodes a prot 2_9406162     | 6.04 | promoter          |
| AT3G19980 | FLOWER-SPECIFIC, PHYTOCHROME-A INTERACTING PROTEIN 1 | Encodes cataly 3_6961730     | 6.04 | promoter          |
| AT1G61900 | na                                                   | unknown proteir 1_22880809   | 6.04 | intergenic        |
| AT2G29670 | na                                                   | Tetratricopeptid 2_12686591  | 6.04 | proximal promoter |
| AT3G19970 | na                                                   | alpha/beta-Hydr 3_6961730    | 6.04 | downstream        |
| AT4G19140 | na                                                   | unknown proteir 4_10469518   | 6.04 | promoter          |
| AT1G09430 | ATP-CITRATE LYASE A-3 (ACLA-3)                       | Encodes subun 1_3041921      | 6.03 | promoter          |
| AT2G46450 | CYCLIC NUCLEOTIDE-GATED CHANNEL 1                    | Member of Cycl 2_19065458    | 6.03 | promoter          |
| AT2G26140 | FTSH PROTEASE 4 (ftsh4)                              | encodes an Fts 2_11135376    | 6.03 | promoter          |
| AT1G09420 | GLUCOSE-6-PHOSPHATE DEHYDROGENASE 1                  | Encodes a prote 1_3041921    | 6.03 | promoter          |
| AT2G26150 | HEAT SHOCK TRANSCRIPTION FACTOR 1                    | member of Heal 2_11135376    | 6.03 | promoter          |
| AT4G23030 | na                                                   | MATE efflux fan 4_12074828   | 6.03 | intergenic        |
| AT2G30060 | na                                                   | Pleckstrin homc 2_12829167   | 6.03 | intergenic        |
| AT2G46810 | na                                                   | basic helix-loop 2_19240928  | 6.03 | intron            |
| AT3G11402 | na                                                   | Cysteine/Histidi 3_3573346   | 6.03 | promoter          |
| AT5G03140 | na                                                   | Concanavalin A 5_742508      | 6.03 | proximal promoter |
| AT4G33220 | PECTIN METHYLESTERASE 44 (PME44)                     | pectin methyl 4_16022056     | 6.03 | promoter          |
| AT4G39980 | 3-DEOXY-D-ARABINO-HEPTULOSONATE 1                    | Encodes a 2-de 4_18539544    | 6.02 | promoter          |
| AT1G14920 | GIBBERELLIC ACID INSENSITIVE (GAI)                   | Similar to a put 1_5151852   | 6.02 | intergenic        |
| AT1G14930 | na                                                   | Polyketide cycl 1_5151852    | 6.02 | intergenic        |
| AT2G24395 | na                                                   | chaperone prote 2_10375353   | 6.02 | promoter          |
| AT4G39970 | na                                                   | Haloacid dehalc 4_18539544   | 6.02 | proximal promoter |
| AT4G28630 | ATP-BINDING CASSETTE B23 (ABC23)                     | Half-molecule A 4_14141117   | 6.01 | promoter          |
| AT4G17490 | ETHYLENE RESPONSIVE ELEMENT BINDING PROTEIN 1        | Encodes a mem 4_9753001      | 6.01 | exon              |
| AT1G02400 | GIBBERELLIN 2-OXIDASE 6 (GA2OX6)                     | Encodes a gibb 1_485744      | 6.01 | proximal promoter |
| AT4G28640 | INDOLE-3-ACETIC ACID INDUCIBLE 11 (IAA11)            | (Auxin induced c 4_14141117  | 6.01 | proximal promoter |
| AT3G22886 | MICRORNA167A (MIR167A)                               | Encodes a micr 3_8106289     | 6.01 | proximal promoter |
| AT3G61980 | na                                                   | serine protease 3_22956965   | 6.01 | promoter          |
| AT4G38810 | na                                                   | Calcium-binding c 4_18119943 | 6.01 | proximal promoter |
| AT1G69850 | NITRATE TRANSPORTER 1:2 (NRT1:2)                     | Encodes an ind 1_26302892    | 6.01 | proximal promoter |
| AT3G61990 | O-MTASE FAMILY 3 PROTEIN (OMTF3)                     | Encodes a prote 3_22956965   | 6.01 | downstream        |
| AT3G25250 | (AGC2-1)                                             | Arabidopsis pro 3_9195200    | 6    | promoter          |
| AT4G37260 | MYB DOMAIN PROTEIN 73 (MYB73)                        | Member of the f 4_17538046   | 6    | proximal promoter |
| AT3G09000 | na                                                   | proline-rich fami 3_2745543  | 6    | promoter          |
| AT1G26270 | na                                                   | Phosphatidyli 1_9092594      | 6    | promoter          |
| AT1G06148 | na                                                   | Unknown gene 1_1879487       | 6    | proximal promoter |
| AT3G57280 | na                                                   | Transmembran 3_21193711      | 6    | promoter          |
| AT4G19430 | na                                                   | unknown proteir 4_10597155   | 6    | intergenic        |
| AT4G35785 | na                                                   | RNA-binding (R 4_16955318    | 6    | promoter          |
| AT4G35790 | PHOSPHOLIPASE D DELTA (PLDDELTA)                     | Encodes a prote 4_16955318   | 6    | downstream        |
| AT3G05890 | RARE-COLD-INDUCIBLE 2B (RCI2B)                       | RARE-COLD-IN 3_1759657       | 6    | proximal promoter |
| AT1G44170 | ALDEHYDE DEHYDROGENASE 3H1 (ALDH3H1)                 | Encodes a prote 1_16798679   | 5.99 | intron            |
| AT5G67380 | CASEIN KINASE ALPHA 1 (CKA1)                         | Casein kinase II 5_26884185  | 5.99 | proximal promoter |



|           |                                                           |                               |      |                   |
|-----------|-----------------------------------------------------------|-------------------------------|------|-------------------|
| AT5G65420 | CYCLIN D4:1 (CYCD4:1)                                     | Encodes a D-tyl 5_26141138    | 5.99 | intergenic        |
| AT1G28360 | ERF DOMAIN PROTEIN 12 (ERF12)                             | encodes a mem 1_9950928       | 5.99 | proximal promoter |
| AT2G38540 | LIPID TRANSFER PROTEIN 1 (LP1)                            | Non-specific lipi 2_16131561  | 5.99 | intergenic        |
| AT3G02170 | LONGIFOLIA2 (LNG2)                                        | Encodes LONG 3_401678         | 5.99 | proximal promoter |
| AT2G38544 | na                                                        | unknown proteir 2_16131561    | 5.99 | exon              |
| AT5G45410 | na                                                        | unknown proteir 5_18403858    | 5.99 | promoter          |
| AT5G56160 | na                                                        | Sec14p-like phc 5_22731845    | 5.99 | promoter          |
| AT2G38290 | AMMONIUM TRANSPORTER 2 (AMT2)                             | encodes a high-2_16042424     | 5.98 | promoter          |
| AT3G62690 | ATL5 (ATL5)                                               | Encodes a RINk 3_23185753     | 5.98 | three_prime_UTR   |
| AT1G55530 | na                                                        | RING/U-box suj 1_20731340     | 5.98 | promoter          |
| AT4G25980 | na                                                        | Peroxidase sup 4_13188986     | 5.98 | promoter          |
| AT3G19340 | na                                                        | LOCATED IN: p 3_6704615       | 5.98 | promoter          |
| AT1G71020 | na                                                        | ARM repeat suj 1_26793184     | 5.98 | promoter          |
| AT2G17880 | na                                                        | Chaperone Dna 2_7767903       | 5.98 | five_prime_UTR    |
| AT2G46320 | na                                                        | Mitochondrial st 2_19014860   | 5.98 | proximal promoter |
| AT5G11070 | na                                                        | unknown proteir 5_3516908     | 5.98 | five_prime_UTR    |
| AT5G11080 | na                                                        | Ubiquitin-like su 5_3516908   | 5.98 | intergenic        |
| AT5G60060 | na                                                        | CONTAINS Inte 5_24188280      | 5.98 | intergenic        |
| AT4G25970 | PHOSPHATIDYLSERINE DECARBOXYLASE                          | Encodes the mc 4_13188986     | 5.98 | intron            |
| AT5G21990 | TETRATRICOPEPTIDE REPEAT 7 (TPR7)                         | Encodes one of 5_7271349      | 5.98 | proximal promoter |
| AT3G03090 | VACUOLAR GLUCOSE TRANSPORTER                              | Encodes a vacc 3_703993       | 5.98 | intron            |
| AT1G53700 | WAG 1 (WAG1)                                              | The WAG1 and 1_20049948       | 5.98 | exon              |
| AT4G28710 | (XIH)                                                     | member of Myo 4_14171034      | 5.97 | proximal promoter |
| AT1G76730 | CLUSTERS OF ORTHOLOGOUS GROUP 1 (CRO1)                    | Encodes a para 1_28804933     | 5.97 | promoter          |
| AT4G11140 | CYTOKININ RESPONSE FACTOR 1 (CRF1)                        | encodes a mem 4_6795031       | 5.97 | exon              |
| AT1G53430 | na                                                        | Leucine-rich rep 1_19935787   | 5.97 | intron            |
| AT3G22440 | na                                                        | FRIGIDA-like pr 3_7959613     | 5.97 | promoter          |
| AT4G28706 | na                                                        | ptkB-like carboh 4_14171034   | 5.97 | intron            |
| AT5G10980 | na                                                        | Histone superfa 5_3473664     | 5.97 | promoter          |
| AT5G47240 | NUDIX HYDROLASE HOMOLOG 8 (NUD8)                          | nudix hydrolase 5_19182895    | 5.97 | proximal promoter |
| AT4G30530 | GAMMA-GLUTAMYL PEPTIDASE 1 (GGF1)                         | Encodes a gam 4_14919244      | 5.96 | proximal promoter |
| AT2G16720 | MYB DOMAIN PROTEIN 7 (MYB7)                               | Encodes a mem 2_7260497       | 5.96 | intergenic        |
| AT4G32870 | na                                                        | Polyketide cycl 4_15863021    | 5.96 | intergenic        |
| AT1G22490 | na                                                        | basic helix-loop 1_7938808    | 5.96 | intron            |
| AT2G40800 | na                                                        | unknown proteir 2_17027077    | 5.96 | promoter          |
| AT4G34412 | na                                                        | CONTAINS Inte 4_16451891      | 5.96 | intergenic        |
| AT5G03660 | na                                                        | Family of unkno 5_941562      | 5.96 | intergenic        |
| AT4G32990 | na                                                        | Transducin/WD 4_15921987      | 5.96 | exon              |
| AT4G34410 | REDOX RESPONSIVE TRANSCRIPTION FACTOR 1 (RTR1)            | encodes a mem 4_16451891      | 5.96 | five_prime_UTR    |
| AT3G51370 | na                                                        | Protein phosph: 3_19068939    | 5.95 | promoter          |
| AT5G62730 | na                                                        | Major facilitator 5_25196407  | 5.95 | proximal promoter |
| AT1G76970 | na                                                        | Target of Myb p 1_28925414    | 5.95 | promoter          |
| AT1G33055 | na                                                        | unknown proteir 1_11974094    | 5.95 | proximal promoter |
| AT1G76980 | na                                                        | BEST Arabidop: 1_28925414     | 5.95 | intergenic        |
| AT4G28200 | na                                                        | FUNCTIONS IN 4_13987453       | 5.95 | downstream        |
| AT5G66910 | na                                                        | Disease resist: 5_26718007    | 5.95 | downstream        |
| AT5G52055 | na                                                        | transposable elk 5_21150752   | 5.95 | intergenic        |
| AT5G66900 | na                                                        | Disease resist: 5_26718007    | 5.95 | promoter          |
| AT3G05630 | PHOSPHOLIPASE D P2 (PLDP2)                                | Encodes a mem 3_1635019       | 5.95 | promoter          |
| AT5G23730 | REPRESSOR OF UV-B PHOTOMORPHOGENESIS 1 (RUP1)             | Encodes REPR 5_8006219        | 5.95 | exon              |
| AT4G28190 | ULTRAPETALA1 (ULT1)                                       | Encodes a nove 4_13987453     | 5.95 | downstream        |
| AT3G05480 | (RAD9)                                                    | Involved in the r 3_1585127   | 5.94 | promoter          |
| AT1G76990 | ACT DOMAIN REPEAT 3 (ACR3)                                | ACT domain rep 1_28931743     | 5.94 | promoter          |
| AT4G14622 | CONSERVED PEPTIDE UPSTREAM OPEN READING FRAME 1 (CUPORF1) | Upstream open 4_8391105       | 5.94 | promoter          |
| AT2G42485 | na                                                        | Unknown gene 2_17691250       | 5.94 | downstream        |
| AT1G30016 | na                                                        | unknown proteir 1_10521172    | 5.94 | exon              |
| AT2G29065 | na                                                        | GRAS family tra 2_12484763    | 5.94 | promoter          |
| AT4G14620 | na                                                        | Protein of unknt 4_8391105    | 5.94 | promoter          |
| AT2G44490 | PENETRATION 2 (PEN2)                                      | Encodes a glyci 2_18368990    | 5.94 | intergenic        |
| AT2G25900 | (ATCTH)                                                   | putative Cys3Hi 2_11040274    | 5.93 | proximal promoter |
| AT2G30490 | CINNAMATE-4-HYDROXYLASE (C4H)                             | Encodes a cinn: 2_12997458    | 5.93 | proximal promoter |
| AT3G23830 | GLYCINE-RICH RNA-BINDING PROTEIN 1 (GRB1)                 | encodes a glyci 3_8608244     | 5.93 | promoter          |
| AT3G60400 | na                                                        | Mitochondrial tri: 3_22326271 | 5.93 | proximal promoter |
| AT5G62550 | na                                                        | unknown proteir 5_25108498    | 5.93 | proximal promoter |
| AT2G30500 | NETWORKED 4B (NET4B)                                      | Kinase interacti 2_12997458   | 5.93 | intergenic        |
| AT1G22280 | PHYTOCHROME-ASSOCIATED PROTEIN 1 (PHYA1)                  | Encodes a phyt 1_7872921      | 5.93 | proximal promoter |
| AT1G06570 | PHYTOENE DESATURATION 1 (PDS1)                            | Mutation of the 1_2013707     | 5.93 | promoter          |
| AT2G45470 | FASCICLIN-LIKE ARABINOGALACTAN POLYMERASE 1 (FALP1)       | FASCICLIN-like 2_18744220     | 5.92 | promoter          |
| AT2G33580 | LYSM-CONTAINING RECEPTOR-LIKE KINASE 1 (LKR1)             | Encodes a Lysk 2_14221945     | 5.92 | promoter          |
| AT2G41250 | na                                                        | Haloacid dehalc 2_17203394    | 5.92 | proximal promoter |
| AT3G26890 | na                                                        | unknown proteir 3_9912083     | 5.92 | promoter          |
| AT5G47380 | na                                                        | Protein of unknt 5_19220961   | 5.92 | intergenic        |
| AT2G33360 | na                                                        | Protein of unknt 2_14139748   | 5.92 | promoter          |
| AT3G13800 | na                                                        | Metallo-hydrola: 3_4538009    | 5.92 | proximal promoter |
| AT5G20050 | na                                                        | Protein kinase s 5_6774058    | 5.92 | promoter          |
| AT5G56880 | na                                                        | unknown proteir 5_23010305    | 5.92 | proximal promoter |
| AT5G39580 | na                                                        | Peroxidase sup 5_15849173     | 5.92 | promoter          |
| AT5G39581 | na                                                        | This gene encod 5_15849173    | 5.92 | exon              |
| AT5G56890 | na                                                        | Protein kinase s 5_23010305   | 5.92 | downstream        |
| AT3G26900 | SHIKIMATE KINASE-LIKE 1 (SKL1)                            | Encodes a prot 3_9912083      | 5.92 | intron            |
| AT5G13820 | TELOMERIC DNA BINDING PROTEIN 1 (TDBP1)                   | Encodes a prot 5_4460646      | 5.92 | promoter          |
| AT1G74700 | TRNASE Z1 (TRZ1)                                          | Encodes a prote 1_28065108    | 5.92 | promoter          |
| AT4G00900 | ER-TYPE CA2+-ATPASE 2 (ECA2)                              | Type IIA (SERC 4_386852       | 5.91 | promoter          |
| AT2G47015 | MICRORNA408 (MIR408)                                      | Encodes a micr 2_19319539     | 5.91 | promoter          |
| AT2G31130 | na                                                        | unknown proteir 2_13266681    | 5.91 | promoter          |
| AT2G47010 | na                                                        | unknown proteir 2_19319539    | 5.91 | downstream        |
| AT1G11090 | na                                                        | alpha/beta-Hydr 1_3702322     | 5.91 | promoter          |
| AT1G54410 | na                                                        | dehydrin family 1_20309257    | 5.91 | intergenic        |
| AT2G39980 | na                                                        | HXXXD-type ac 2_16690077      | 5.91 | promoter          |
| AT4G00300 | na                                                        | fringe-related pr 4_128561    | 5.91 | intron            |
| AT4G00905 | na                                                        | NC domain-con 4_386852        | 5.91 | proximal promoter |
| AT4G16563 | na                                                        | Eukaryotic aspa 4_9330117     | 5.91 | exon              |
| AT4G16560 | na                                                        | HSP20-like chai 4_9330117     | 5.91 | proximal promoter |
| AT4G14150 | PHRAGMOPLAST-ASSOCIATED KINESIN II (PAKII)                | Microtubule mol 4_8165399     | 5.91 | promoter          |

|           |                                                          |                               |                        |
|-----------|----------------------------------------------------------|-------------------------------|------------------------|
| AT4G22130 | STRUBBELIG-RECEPTOR FAMILY 8 (SR STRUBBELIG-r 4_11720315 | 5.91                          | intergenic             |
| AT1G18870 | ISOCHORISMATE SYNTHASE 2 (ICS2)                          | Encodes a prot 1_6512631      | 5.9 proximal promoter  |
| AT5G08510 | na                                                       | Pentatricopeptic 5_2753060    | 5.9 promoter           |
| AT1G51550 | na                                                       | Kelch repeat-co 1_19119503    | 5.9 promoter           |
| AT1G51560 | na                                                       | Pyridoxamine 5' 1_19119503    | 5.9 downstream         |
| AT2G17295 | na                                                       | snoRNA; snoRt 2_7520044       | 5.9 proximal promoter  |
| AT3G50120 | na                                                       | Plant protein of 3_18585997   | 5.9 exon               |
| AT4G03280 | PHOTOSYNTHETIC ELECTRON TRANSFER                         | Encodes the Rik 4_1440020     | 5.9 promoter           |
| AT2G30070 | POTASSIUM TRANSPORTER 1 (KT1)                            | Encodes a high 2_12831157     | 5.9 intergenic         |
| AT5G52400 | CYTOCHROME P450, FAMILY 715, SUBF                        | member of CYP 5_21274942      | 5.89 intron            |
| AT1G32240 | KANADI 2 (KAN2)                                          | Encodes a merr 1_11628440     | 5.89 intron            |
| AT3G55850 | LONG AFTER FAR-RED 3 (LAF3)                              | Encodes a prod 3_20725679     | 5.89 intron            |
| AT3G56050 | na                                                       | Protein kinase f: 3_20801397  | 5.89 promoter          |
| AT5G51790 | na                                                       | basic helix-loop 5_21039524   | 5.89 promoter          |
| AT5G52410 | na                                                       | INVOLVED IN: 1_5_21274942     | 5.89 proximal promoter |
| AT5G67220 | na                                                       | FMN-linked oxic 5_26822184    | 5.89 promoter          |
| AT2G41890 | na                                                       | curculin-like (m 2_17483507   | 5.89 intergenic        |
| AT5G48360 | na                                                       | Actin-binding Ft 5_19595612   | 5.89 promoter          |
| AT5G52882 | na                                                       | P-loop containir 5_21437772   | 5.89 intron            |
| AT3G15510 | NAC DOMAIN CONTAINING PROTEIN 2                          | Note of caution: 3_5239305    | 5.89 intergenic        |
| AT4G19660 | NPR1-LIKE PROTEIN 4 (NPR4)                               | Encodes a anky 4_10698837     | 5.89 proximal promoter |
| AT5G54380 | THESEUS1 (THE1)                                          | Encodes THESE1_22080252       | 5.89 promoter          |
| AT2G22680 | WAV3 HOMOLOG 1 (WAVH1)                                   | Zinc finger (C3t 2_9642887    | 5.89 proximal promoter |
| AT4G01360 | BYPASS 3 (BPS3)                                          | Encodes a prot 4_567052       | 5.88 intergenic        |
| AT4G31820 | ENHANCER OF PINOID (ENP)                                 | A member of th 4_15396163     | 5.88 proximal promoter |
| AT2G42590 | GENERAL REGULATORY FACTOR 9 (GRF9)                       | 14-3-3 gene. Bir 2_17733954   | 5.88 five_prime_UTR    |
| AT4G01370 | MAP KINASE 4 (MPK4)                                      | Encodes a nucl 4_567052       | 5.88 promoter          |
| AT1G19710 | na                                                       | UDP-Glycosyltr: 1_6814453     | 5.88 promoter          |
| AT2G42600 | PHOSPHOENOLPYRUVATE CARBOXYLASE                          | Encodes one of 2_17733954     | 5.88 intergenic        |
| AT1G04010 | PHOSPHOLIPID STEROL ACYL TRANSFERASE                     | phospholipid ste 1_1033243    | 5.88 exon              |
| AT1G54130 | RELA/SPOT HOMOLOG 3 (RSH3)                               | RELA/SPOT ho 1_20209370       | 5.88 proximal promoter |
| AT3G19930 | SUGAR TRANSPORTER 4 (STP4)                               | Encodes a suc 3_6934004       | 5.88 proximal promoter |
| AT5G57050 | ABA INSENSITIVE 2 (ABI2)                                 | Encodes a prot 5_23087408     | 5.87 five_prime_UTR    |
| AT3G48090 | ENHANCED DISEASE SUSCEPTIBILITY                          | Component of F 3_17757950     | 5.87 promoter          |
| AT2G17230 | EXORDIUM LIKE 5 (EXL5)                                   | EXORDIUM like 2_7493762       | 5.87 intergenic        |
| AT4G04840 | METHIONINE SULFOXIDE REDUCTASE                           | methionine sulf 4_2448383     | 5.87 proximal promoter |
| AT2G25095 | MICRORNA156A (MIR156A)                                   | Encodes a micr 2_10676987     | 5.87 promoter          |
| AT1G74780 | na                                                       | Nodulin-like / Mi: 1_28095685 | 5.87 promoter          |
| AT3G55573 | na                                                       | This gene encod 3_20611415    | 5.87 exon              |
| AT5G16210 | na                                                       | HEAT repeat-cc 5_5298035      | 5.87 promoter          |
| AT5G16220 | na                                                       | Octicosapeptide 5_5298035     | 5.87 intergenic        |
| AT5G61570 | na                                                       | Protein kinase s 5_24757679   | 5.87 proximal promoter |
| AT3G19553 | POLYAMINE UPTAKE TRANSPORTER 5                           | Encodes POLY. 3_6793057       | 5.87 promoter          |
| AT3G24550 | PROLINE-RICH EXTENSIN-LIKE RECEPTOR                      | Encodes a merr 3_8960292      | 5.87 five_prime_UTR    |
| AT3G24560 | RASPBERRY 3 (RSY3)                                       | novel gene invo 3_8960292     | 5.87 intergenic        |
| AT3G48100 | RESPONSE REGULATOR 5 (RR5)                               | Encodes a trans 3_17757950    | 5.87 intergenic        |
| AT3G21560 | UDP-GLUCOSYL TRANSFERASE 84A2 (UGT84A2)                  | Encodes a prot 3_7595704      | 5.87 promoter          |
| AT2G20960 | (pEARL14)                                                | pEARL14; CON' 2_9006055       | 5.86 proximal promoter |
| AT2G46530 | AUXIN RESPONSE FACTOR 11 (ARF11)                         | auxin response 2_19104518     | 5.86 promoter          |
| AT1G01380 | ENHANCER OF TRY AND CPC 1 (ETC1)                         | ETC1 is involve 1_146299      | 5.86 proximal promoter |
| AT1G29400 | MEI2-LIKE PROTEIN 5 (ML5)                                | A member of m 1_10294729      | 5.86 promoter          |
| AT1G19980 | na                                                       | cytomatrix prote 1_6932856    | 5.86 promoter          |
| AT3G52230 | na                                                       | unknown proteir 3_19371175    | 5.86 promoter          |
| AT5G14011 | na                                                       | This gene encod 5_4523320     | 5.86 promoter          |
| AT5G17233 | na                                                       | This gene encod 5_5664277     | 5.86 downstream        |
| AT1G70990 | na                                                       | proline-rich fami 1_26768741  | 5.86 proximal promoter |
| AT2G20950 | na                                                       | Arabidopsis phc 2_9006055     | 5.86 downstream        |
| AT3G24190 | na                                                       | Protein kinase s 3_8743045    | 5.86 promoter          |
| AT4G04630 | na                                                       | Protein of unkn 4_2331936     | 5.86 three_prime_UTR   |
| AT5G67455 | na                                                       | pre-tRNA; tRNA 5_26921665     | 5.86 promoter          |
| AT5G67460 | na                                                       | O-Glycosyl hydr 5_26921665    | 5.86 three_prime_UTR   |
| AT5G56550 | OXIDATIVE STRESS 3 (OXS3)                                | Encodes OXID3_5_22896802      | 5.86 promoter          |
| AT1G49780 | PLANT U-BOX 26 (PUB26)                                   | plant U-box 26 ( 1_18433009   | 5.86 proximal promoter |
| AT3G05750 | TON1 RECRUITING MOTIF 6 (TRM6)                           | unknown proteir 3_1703990     | 5.86 promoter          |
| AT5G46110 | ACCLIMATION OF PHOTOSYNTHESIS 1 (ACIP1)                  | Encodes a chlo 5_18697377     | 5.85 five_prime_UTR    |
| AT5G48380 | BAK1-INTERACTING RECEPTOR-LIKE KINASE 1 (BIK1)           | Encodes a BAK 5_19607074      | 5.85 promoter          |
| AT2G43400 | ELECTRON-TRANSFER FLAVOPROTEIN 1 (ETF1)                  | Encodes a uniq 2_18021119     | 5.85 promoter          |
| AT3G05670 | na                                                       | RING/U-box prc 3_1653130      | 5.85 promoter          |
| AT1G18382 | na                                                       | Potential natura 1_6324782    | 5.85 intergenic        |
| AT1G18390 | na                                                       | Protein kinase s 1_6324782    | 5.85 proximal promoter |
| AT3G27770 | na                                                       | unknown proteir 3_10287809    | 5.85 promoter          |
| AT3G11590 | na                                                       | unknown proteir 3_3656694     | 5.85 intergenic        |
| AT4G00500 | na                                                       | alpha/beta-Hydr 4_227533      | 5.85 promoter          |
| AT4G00520 | na                                                       | Acyl-CoA thioes 4_227533      | 5.85 promoter          |
| AT4G28180 | na                                                       | unknown proteir 4_13983868    | 5.85 promoter          |
| AT4G28181 | na                                                       | This gene encod 4_13983868    | 5.85 downstream        |
| AT1G80110 | PHLOEM PROTEIN 2-B11 (PP2-B11)                           | phloem proteir : 1_30135256   | 5.85 promoter          |
| AT2G32940 | ARGONAUTE 6 (AGO6)                                       | Encodes a nucl 2_13977836     | 5.84 promoter          |
| AT2G32950 | CONSTITUTIVE PHOTOMORPHOGENIC 1 (CP1)                    | Represses phot 2_13977836     | 5.84 promoter          |
| AT1G29980 | na                                                       | INVOLVED IN: 1_1_10504237     | 5.84 exon              |
| AT5G37850 | SALT OVERLY SENSITIVE 4 (SOS4)                           | Encodes a pyric 5_15065264    | 5.84 promoter          |
| AT5G16370 | ACYL ACTIVATING ENZYME 5 (AAE5)                          | acyl activating e 5_5356529   | 5.83 downstream        |
| AT2G22670 | INDOLEACETIC ACID-INDUCED PROTEIN 1 (IAA1)               | IAA8 (IAA8) qer 2_9635351     | 5.83 proximal promoter |
| AT1G07520 | na                                                       | GRAS family tra 1_2312247     | 5.83 promoter          |
| AT1G32740 | na                                                       | SBP (S-ribonuci 1_11846032    | 5.83 exon              |
| AT1G68585 | na                                                       | unknown proteir 1_25756529    | 5.83 promoter          |
| AT1G68580 | na                                                       | agenet domain- 1_25756529     | 5.83 intergenic        |
| AT3G51980 | na                                                       | ARM repeat sup 3_19287791     | 5.83 promoter          |
| AT3G51990 | na                                                       | Protein kinase s 3_19287791   | 5.83 promoter          |
| AT3G46540 | na                                                       | ENTH/VHS fam 3_17133487       | 5.83 intergenic        |
| AT5G14370 | na                                                       | CCT motif famil 5_4630143     | 5.83 intergenic        |
| AT5G14360 | na                                                       | Ubiquitin-like su 5_4630143   | 5.83 proximal promoter |
| AT5G16360 | na                                                       | NC domain-con 5_5356529       | 5.83 promoter          |
| AT1G68590 | PLASTID-SPECIFIC RIBOSOMAL PROTEIN 1 (PRP1)              | Ribosomal prote 1_25756529    | 5.83 intergenic        |

|           |                                    |                              |      |                   |
|-----------|------------------------------------|------------------------------|------|-------------------|
| AT3G46530 | RECOGNITION OF PERONOSPORA PAF     | Confers resistar 3_17133487  | 5.83 | promoter          |
| AT2G30880 | (SWAP70)                           | Pleckstrin homc 2_13146052   | 5.82 | promoter          |
| AT1G33980 | (UPF3)                             | Involved in mRN 1_12355743   | 5.82 | intergenic        |
| AT1G59640 | BIG PETAL P (BPEP)                 | A basic helix-lox 1_21911425 | 5.82 | promoter          |
| AT3G11550 | CASPARIAN STRIP MEMBRANE DOMAII    | Uncharacterise 3_3639371     | 5.82 | downstream        |
| AT3G49620 | DARK INDUCIBLE 11 (DIN11)          | encodes a prote 3_18393147   | 5.82 | proximal promoter |
| AT3G52770 | LITTLE ZIPPER 3 (ZPR3)             | ZPR3 is a small 3_19559217   | 5.82 | promoter          |
| AT1G33990 | METHYL ESTERASE 14 (MES14)         | Encodes a prote 1_12355743   | 5.82 | five_prime_UTR    |
| AT4G22240 | na                                 | Plastid-lipid ass 4_11767474 | 5.82 | promoter          |
| AT4G22250 | na                                 | RING/U-box suj 4_11767474    | 5.82 | downstream        |
| AT3G60930 | na                                 | transposable elk 3_22513918  | 5.82 | promoter          |
| AT1G29290 | na                                 | unknown protei 1_10243620    | 5.82 | proximal promoter |
| AT1G04650 | na                                 | unknown protei 1_1299514     | 5.82 | proximal promoter |
| AT1G62045 | na                                 | BEST Arabidop: 1_22936871    | 5.82 | proximal promoter |
| AT1G62050 | na                                 | Ankyrin repeat f 1_22936871  | 5.82 | intron            |
| AT3G11560 | na                                 | LETM1-like prot 3_3639371    | 5.82 | promoter          |
| AT4G34360 | na                                 | S-adenosyl-L-m 4_16431469    | 5.82 | promoter          |
| AT1G33060 | NAC 014 (NAC014)                   | NAC 014 (NAC) 1_11978699     | 5.82 | promoter          |
| AT2G33870 | RAB GTPASE HOMOLOG A1H (ArRABA1    | RAB GTPase hr 2_14336860     | 5.82 | intergenic        |
| AT3G21090 | ATP-BINDING CASSETTE G15 (ABCG15   | ABC-2 type tran 3_7395152    | 5.81 | promoter          |
| AT2G39800 | DELTA1-PYRROLINE-5-CARBOXYLATE     | encodes a delta 2_16603221   | 5.81 | five_prime_UTR    |
| AT1G68050 | FLAVIN-BINDING, KELCH REPEAT, F BC | Encodes FKF1, 1_25508475     | 5.81 | promoter          |
| AT1G69800 | na                                 | Cystathionine bi 1_26276330  | 5.81 | promoter          |
| AT1G74510 | na                                 | Galactose oxid: 1_28005205   | 5.81 | promoter          |
| AT4G28703 | na                                 | RmlC-like cupin 4_14165752   | 5.81 | proximal promoter |
| AT1G70250 | na                                 | Encodes a Prot 1_26451139    | 5.81 | proximal promoter |
| AT3G18990 | REDUCED VERNALIZATION RESPONSE     | Required for vei 3_6551932   | 5.81 | promoter          |
| AT2G30440 | THYLAKOID PROCESSING PEPTIDE (TF   | Encodes a thyla 2_12972871   | 5.81 | promoter          |
| AT3G46590 | TRF-LIKE 1 (TRFL1)                 | Encodes a prote 3_17152615   | 5.81 | promoter          |
| AT1G70230 | TRICHOME BIREFRINGENCE-LIKE 27 (T  | Encodes a merr 1_26451139    | 5.81 | exon              |
| AT1G45249 | ABSCISIC ACID RESPONSIVE ELEMENT   | Leucine zipper 1_17169162    | 5.8  | proximal promoter |
| AT2G44810 | DEFECTIVE ANTHR DEHISCENCE 1 (D    | Mutant has defe 2_18478013   | 5.8  | proximal promoter |
| AT5G06710 | HOMEBOX FROM ARABIDOPSIS THAL      | Homeobox-leuc 5_2070803      | 5.8  | promoter          |
| AT4G10340 | LIGHT HARVESTING COMPLEX OF PHC    | photosystem II 4_6407934     | 5.8  | promoter          |
| AT2G45360 | na                                 | Protein of unkn 2_18699245   | 5.8  | exon              |
| AT1G45170 | na                                 | unknown protei 1_17098096    | 5.8  | promoter          |
| AT2G44798 | na                                 | Potential natura 2_18465103  | 5.8  | intergenic        |
| AT2G44800 | na                                 | 2-oxoglutarate ( 2_18465103  | 5.8  | proximal promoter |
| AT4G10330 | na                                 | glycine-rich prot 4_6407934  | 5.8  | downstream        |
| AT4G00430 | PLASMA MEMBRANE INTRINSIC PROTE    | a member of the 4_189153     | 5.8  | proximal promoter |
| AT1G24400 | LYSINE HISTIDINE TRANSPORTER 2 (LH | High-affinity trar 1_8653830 | 5.79 | promoter          |
| AT4G15760 | MONOOXYGENASE 1 (MO1)              | Encodes a prote 4_8974631    | 5.79 | five_prime_UTR    |
| AT1G22680 | na                                 | unknown protei 1_8026544     | 5.79 | promoter          |
| AT2G33500 | na                                 | B-box type zinc 2_14190273   | 5.79 | promoter          |
| AT4G15765 | na                                 | FAD/NAD(P)-bi 4_8974631      | 5.79 | intergenic        |
| AT5G10946 | na                                 | unknown protei 5_3457587     | 5.79 | promoter          |
| AT5G60390 | na                                 | GTP binding Elc 5_24292214   | 5.79 | intergenic        |
| AT5G60400 | na                                 | unknown protei 5_24292214    | 5.79 | promoter          |
| AT2G41900 | OXIDATIVE STRESS 2 (OXS2)          | CCCH-type zinc 2_17485471    | 5.79 | intergenic        |
| AT2G38170 | CATION EXCHANGER 1 (CAX1)          | Encodes a high 2_15991966    | 5.78 | intron            |
| AT2G17570 | na                                 | Undecaprenyl p 2_7643903     | 5.78 | promoter          |
| AT5G46295 | na                                 | unknown protei 5_18777590    | 5.78 | intergenic        |
| AT1G72140 | na                                 | Major facilitator 1_27140955 | 5.78 | proximal promoter |
| AT4G24110 | na                                 | unknown protei 4_12523631    | 5.78 | proximal promoter |
| AT5G03700 | na                                 | D-mannose bin 5_968822       | 5.78 | proximal promoter |
| AT4G32050 | na                                 | neurochondrin f 4_15501024   | 5.78 | downstream        |
| AT4G32060 | na                                 | calcium-binding 4_15501024   | 5.78 | promoter          |
| AT4G18140 | SCP1-LIKE SMALL PHOSPHATASE 4B (S  | Encodes a SCP 4_10049596     | 5.78 | promoter          |
| AT3G61740 | SET DOMAIN PROTEIN 14 (SDG14)      | SET domain prc 3_22857179    | 5.78 | promoter          |
| AT4G24120 | YELLOW STRIPE LIKE 1 (YSL1)        | Member of a sr 4_12523631    | 5.78 | proximal promoter |
| AT1G04610 | YUCCA 3 (YUC3)                     | YUCCA 3 (YUC 1_1274215       | 5.78 | intergenic        |
| AT1G70410 | BETA CARBONIC ANHYDRASE 4 (BCA4    | Encodes a puta 1_26539066    | 5.77 | proximal promoter |
| AT4G27820 | BETA GLUCOSIDASE 9 (BGLU9)         | beta glucosidas 4_13860836   | 5.77 | promoter          |
| AT5G43100 | na                                 | Eukaryotic aspa 5_17299078   | 5.77 | promoter          |
| AT3G28200 | na                                 | Peroxidase sup 3_10518040    | 5.77 | promoter          |
| AT1G29660 | na                                 | GDSL-like Lipas 1_10368809   | 5.77 | intergenic        |
| AT4G30350 | na                                 | Double Clp-N m 4_14844524    | 5.77 | intergenic        |
| AT5G09960 | na                                 | FUNCTIONS IN 5_3106209       | 5.77 | promoter          |
| AT5G22270 | na                                 | unknown protei 5_7371999     | 5.77 | downstream        |
| AT5G47910 | RESPIRATORY BURST OXIDASE HOMO     | NADPH/respiral 5_19399200    | 5.77 | intron            |
| AT1G47128 | ESPONSIVE TO DEHYDRATION 21A (RC   | cysteine protein 1_17288453  | 5.76 | proximal promoter |
| AT1G07430 | HIGHLY ABA-INDUCED PP2C GENE 2 (H  | highly ABA-indu 1_2283071    | 5.76 | promoter          |
| AT4G17560 | na                                 | Ribosomal prote 4_9780038    | 5.76 | promoter          |
| AT5G53270 | na                                 | Seed maturatio 5_21607332    | 5.76 | promoter          |
| AT2G03280 | na                                 | O-fucosyltransf 2_998369     | 5.76 | promoter          |
| AT2G28507 | na                                 | unknown protei 2_12196893    | 5.76 | intergenic        |
| AT2G38500 | na                                 | 2-oxoglutarate ( 2_16119307  | 5.76 | promoter          |
| AT3G17100 | na                                 | sequence-speci 3_5833209     | 5.76 | intergenic        |
| AT3G52520 | na                                 | unknown protei 3_19472812    | 5.76 | proximal promoter |
| AT4G28085 | na                                 | unknown protei 4_13959385    | 5.76 | proximal promoter |
| AT5G14330 | na                                 | unknown protei 5_4621088     | 5.76 | proximal promoter |
| AT5G53280 | PLASTID DIVISION1 (PDV1)           | An integral oute 5_21607332  | 5.76 | promoter          |
| AT1G49600 | RNA-BINDING PROTEIN 47A (RBP47A)   | RNA-binding pri 1_18357749   | 5.76 | intron            |
| AT3G18370 | (ATSYTF)                           | ATSYTF; FUNC 3_6304821       | 5.75 | proximal promoter |
| AT3G48870 | (HSP93-III)                        | Encodes a nucl 3_18126662    | 5.75 | intron            |
| AT1G69410 | EUKARYOTIC ELONGATION FACTOR 5/    | Encodes eIF5A- 1_26091065    | 5.75 | intergenic        |
| AT1G03475 | LESION INITIATION 2 (LIN2)         | Encodes copro: 1_868915      | 5.75 | downstream        |
| AT5G17920 | METHIONINE SYNTHESIS 1 (ATMS1)     | Encodes a cyto: 5_5939635    | 5.75 | downstream        |
| AT1G11700 | na                                 | Protein of unkn 1_3945116    | 5.75 | proximal promoter |
| AT5G43870 | na                                 | FUNCTIONS IN 5_17635964      | 5.75 | promoter          |
| AT1G69420 | na                                 | DHHC-type zinc 1_26091065    | 5.75 | proximal promoter |
| AT5G12440 | na                                 | CCCH-type zinc 5_4039505     | 5.75 | intron            |
| AT5G12450 | na                                 | FBD-like domai 5_4039505     | 5.75 | proximal promoter |
| AT3G16990 | na                                 | Haem oxygenas 3_5796992      | 5.75 | promoter          |

|           |                                                        |                              |      |                   |
|-----------|--------------------------------------------------------|------------------------------|------|-------------------|
| AT3G48880 | na                                                     | RNI-like superfa 3_18126662  | 5.75 | promoter          |
| AT1G03470 | NETWORKED 3A (NET3A)                                   | Encodes a merr 1_868915      | 5.75 | proximal promoter |
| AT2G34420 | PHOTOSYSTEM II LIGHT HARVESTING I                      | Photosystem II l 2_14523666  | 5.75 | promoter          |
| AT4G00430 | PLASMA MEMBRANE INTRINSIC PROTEIN                      | a member of the 4_186332     | 5.75 | intron            |
| AT3G17000 | UBIQUITIN-CONJUGATING ENZYME 32                        | ubiquitin-conjug 3_5796992   | 5.75 | promoter          |
| AT4G34160 | CYCLIN D3:1 (CYCD3:1)                                  | encodes a cyclin 4_16355001  | 5.74 | proximal promoter |
| AT3G26210 | CYTOCHROME P450, FAMILY 71, SUBFAMILY                  | putative cytochr 3_9595985   | 5.74 | proximal promoter |
| AT3G26220 | CYTOCHROME P450, FAMILY 71, SUBFAMILY                  | cytochrome P4f 3_9595985     | 5.74 | downstream        |
| AT4G00820 | IQ-DOMAIN 17 (iqd17)                                   | IQ-domain 17 (i 4_349077     | 5.74 | promoter          |
| AT1G73500 | MAP KINASE KINASE 9 (MKK9)                             | member of MAF 1_27641855     | 5.74 | proximal promoter |
| AT5G13760 | na                                                     | Plasma-membr 5_4445305       | 5.74 | intergenic        |
| AT5G13770 | na                                                     | Pentatricopeptic 5_4445305   | 5.74 | promoter          |
| AT4G31000 | na                                                     | Calmodulin-binc 4_15103030   | 5.74 | promoter          |
| AT1G70200 | na                                                     | RNA-binding (R 1_26434960    | 5.74 | proximal promoter |
| AT1G78210 | na                                                     | alpha/beta-Hydr 1_29424933   | 5.74 | proximal promoter |
| AT2G21520 | na                                                     | Sec14p-like phc 2_9215139    | 5.74 | promoter          |
| AT4G34140 | na                                                     | D111/G-patch c 4_16355001    | 5.74 | intergenic        |
| AT4G20040 | na                                                     | Pectin lyase-like 4_10850185 | 5.74 | proximal promoter |
| AT4G27560 | na                                                     | UDP-Glycosyltr 4_13761885    | 5.74 | promoter          |
| AT4G34150 | na                                                     | Calcium-depend 4_16355001    | 5.74 | five_prime_UTR    |
| AT4G30996 | NA(+)- AND K(+)-SENSITIVE 1 (NKS1)                     | NKS1, a plant-s 4_15103030   | 5.74 | intergenic        |
| AT2G01180 | PHOSPHATIDIC ACID PHOSPHATASE 1                        | Encodes phosph 2_108843      | 5.74 | promoter          |
| AT4G20050 | QUARTET 3 (QRT3)                                       | Encodes a poly 4_10850185    | 5.74 | exon              |
| AT1G53390 | ATP-BINDING CASSETTE G24 (ABCG24)                      | P-loop containir 1_19916686  | 5.73 | proximal promoter |
| AT1G14350 | FOUR LIPS (FLP)                                        | Encodes a puta 1_4906954     | 5.73 | proximal promoter |
| AT3G28920 | HOMEODOMAIN PROTEIN 34 (HB34)                          | homeobox prote 3_10941960    | 5.73 | promoter          |
| AT1G04810 | na                                                     | 26S proteasom 1_1355758      | 5.73 | intergenic        |
| AT3G62000 | na                                                     | S-adenosyl-L-m 3_22962144    | 5.73 | proximal promoter |
| AT1G53380 | na                                                     | Plant protein of 1_19916686  | 5.73 | promoter          |
| AT2G27830 | na                                                     | unknown protei 2_11859541    | 5.73 | proximal promoter |
| AT5G56240 | na                                                     | INVOLVED IN: 5_22764474      | 5.73 | five_prime_UTR    |
| AT2G27820 | PREPHENATE DEHYDRATASE 1 (PD1)                         | Encodes a plasi 2_11859541   | 5.73 | intergenic        |
| AT1G13260 | RELATED TO ABI3/VP1 1 (RAV1)                           | Encodes an AP_ 1_4540813     | 5.73 | proximal promoter |
| AT1G71880 | SUCROSE-PROTON SYMPORTER 1 (SUCP1)                     | Sucrose transp 1_27054007    | 5.73 | promoter          |
| AT1G04820 | TUBULIN ALPHA-4 CHAIN (TUA4)                           | Encodes an alp 1_1355758     | 5.73 | intergenic        |
| AT3G21781 | na                                                     | Potential natura 3_7675860   | 5.72 | promoter          |
| AT2G22530 | na                                                     | Alkaline-phosph 2_9577670    | 5.72 | promoter          |
| AT1G22250 | na                                                     | unknown protei 1_7858793     | 5.72 | promoter          |
| AT1G15530 | na                                                     | Concanavalin A 1_5342112     | 5.72 | promoter          |
| AT5G57480 | na                                                     | P-loop containir 5_23283348  | 5.72 | proximal promoter |
| AT5G06270 | na                                                     | unknown protei 5_1914572     | 5.72 | intergenic        |
| AT1G50420 | SCARECROW-LIKE 3 (SCL3)                                | Encodes a scar 1_18681048    | 5.72 | proximal promoter |
| AT3G21780 | UDP-GLUCOSYL TRANSFERASE 71B6 (UGT71B6)                | Encodes a prote 3_7675860    | 5.72 | exon              |
| AT5G57490 | VOLTAGE DEPENDENT ANION CHANNEL 1 (VDAC1)              | Encodes a volta 5_23283348   | 5.72 | intergenic        |
| AT4G24280 | CHLOROPLAST HEAT SHOCK PROTEIN 17 (HSP17)              | Involved in prot 4_12594170  | 5.71 | intergenic        |
| AT3G01472 | CONSERVED PEPTIDE UPSTREAM OPEN READING FRAME 1 (CUP1) | Upstream open 3_182955       | 5.71 | three_prime_UTR   |
| AT3G01070 | EARLY NODULIN-LIKE PROTEIN 16 (ENL1)                   | early nodulin-lk 3_20881     | 5.71 | downstream        |
| AT5G04140 | GLUTAMATE SYNTHASE 1 (GLU1)                            | Encodes a gene 5_1129746     | 5.71 | promoter          |
| AT3G01470 | HOMEODOMAIN 1 (HB-1)                                   | Encodes a hom 3_182955       | 5.71 | three_prime_UTR   |
| AT2G20370 | MURUS 3 (MUR3)                                         | Encodes a xylo 2_8791837     | 5.71 | promoter          |
| AT1G15405 | na                                                     | Unknown gene 1_5297848       | 5.71 | downstream        |
| AT2G34250 | na                                                     | SecY protein tra 2_14462050  | 5.71 | promoter          |
| AT3G47830 | na                                                     | DNA glycosylas 3_17646384    | 5.71 | proximal promoter |
| AT3G61198 | na                                                     | Unknown gene 3_22655288      | 5.71 | intergenic        |
| AT4G24290 | na                                                     | MAC/Perforin di 4_12594170   | 5.71 | promoter          |
| AT3G63200 | PATATIN-LIKE PROTEIN 9 (PLP9)                          | PATATIN-like pi 3_23347351   | 5.71 | exon              |
| AT1G63090 | PHLOEM PROTEIN 2-A11 (PP2-A11)                         | phloem protein : 1_23395453  | 5.71 | proximal promoter |
| AT3G47820 | PLANT U-BOX 39 (PUB39)                                 | PLANT U-BOX 3_17646384       | 5.71 | downstream        |
| AT4G17870 | PYRABACTIN RESISTANCE 1 (PYR1)                         | Encodes a merr 4_9930403     | 5.71 | intergenic        |
| AT3G19820 | DWARF 1 (DWF1)                                         | Involved in the r 3_6882206  | 5.7  | intron            |
| AT4G13050 | na                                                     | Acyl-ACP thioes 4_7617574    | 5.7  | five_prime_UTR    |
| AT1G17090 | na                                                     | unknown protei 1_5844341     | 5.7  | promoter          |
| AT1G17100 | na                                                     | SOUL heme-bir 1_5844341      | 5.7  | promoter          |
| AT1G27350 | na                                                     | Ribosome asso 1_9499597      | 5.7  | promoter          |
| AT2G24165 | na                                                     | pseudogene, sii 2_10272614   | 5.7  | downstream        |
| AT3G04920 | na                                                     | Ribosomal prote 3_1358594    | 5.7  | proximal promoter |
| AT3G27400 | na                                                     | Pectin lyase-like 3_10141076 | 5.7  | intron            |
| AT1G32060 | PHOSPHORIBULOKINASE (PRK)                              | phosphoribuloki 1_11531991   | 5.7  | proximal promoter |
| AT1G32050 | SECRETORY CARRIER MEMBRANE PROTEIN 1 (SCAMP1)          | SCAMP family r 1_11531991    | 5.7  | intergenic        |
| AT3G04910 | WITH NO LYSINE (K) KINASE 1 (WLNK1)                    | Serine/threonine 3_1358594   | 5.7  | intergenic        |
| AT4G34000 | ABSCISIC ACID RESPONSIVE ELEMENT 1 (ARE1)              | Encodes an AB_ 4_16295276    | 5.69 | promoter          |
| AT5G62940 | HIGH CAMBIAL ACTIVITY2 (HCA2)                          | HCA2 induces t 5_25259322    | 5.69 | proximal promoter |
| AT1G67900 | na                                                     | Phototropic-resi 1_25466745  | 5.69 | intron            |
| AT1G71070 | na                                                     | Core-2/l-branch 1_26809634   | 5.69 | promoter          |
| AT1G71080 | na                                                     | RNA polymeras 1_26809634     | 5.69 | downstream        |
| AT2G30100 | na                                                     | pentatricopeptic 2_12847372  | 5.69 | promoter          |
| AT5G10455 | na                                                     | pre-tRNA; tRNA 5_3287686     | 5.69 | promoter          |
| AT5G10460 | na                                                     | Haloacid dehalc 5_3287686    | 5.69 | promoter          |
| AT4G18760 | RECEPTOR LIKE PROTEIN 51 (RLP51)                       | receptor like prc 4_10309565 | 5.69 | promoter          |
| AT4G14030 | SELENIUM-BINDING PROTEIN 1 (SBP1)                      | selenium-bindin 4_8100507    | 5.69 | promoter          |
| AT4G14040 | SELENIUM-BINDING PROTEIN 2 (SBP2)                      | selenium-bindin 4_8100507    | 5.69 | three_prime_UTR   |
| AT5G20490 | (XIK)                                                  | Encodes a merr 5_6937874     | 5.68 | promoter          |
| AT4G38460 | GERANYLGERANYL REDUCTASE (GGR)                         | geranylgeranyl i 4_17996035  | 5.68 | three_prime_UTR   |
| AT1G76490 | HYDROXY METHYLGLUTARYL COA RECEPTOR 1 (HMGCR1)         | Encodes a 3-hy 1_28699598    | 5.68 | intergenic        |
| AT5G14545 | MICRORNA398B (MIR398B)                                 | Encodes a micr 5_4690709     | 5.68 | promoter          |
| AT5G13950 | na                                                     | unknown protei 5_4495792     | 5.68 | downstream        |
| AT5G13940 | na                                                     | aminopeptidase 5_4495792     | 5.68 | promoter          |
| AT3G02620 | na                                                     | Plant stearoyl-a 3_561850    | 5.68 | three_prime_UTR   |
| AT3G02630 | na                                                     | Plant stearoyl-a 3_561850    | 5.68 | promoter          |
| AT3G07170 | na                                                     | Sterile alpha mc 3_2280090   | 5.68 | promoter          |
| AT5G14550 | na                                                     | Core-2/l-branch 5_4690709    | 5.68 | intergenic        |
| AT5G14540 | na                                                     | FUNCTIONS IN 5_4690709       | 5.68 | proximal promoter |
| AT5G20500 | na                                                     | Glutaredoxin far 5_6937874   | 5.68 | proximal promoter |
| AT3G12200 | NIMA-RELATED KINASE 7 (Nek7)                           | Encodes AtNek 3_3890843      | 5.68 | intron            |

|           |                                     |                    |            |      |                   |
|-----------|-------------------------------------|--------------------|------------|------|-------------------|
| AT4G34410 | REDOX RESPONSIVE TRANSCRIPTION      | encodes a mem      | 4_16449844 | 5.68 | proximal promoter |
| AT1G67400 | na                                  | ELMO/CED-12        | 1_25249933 | 5.67 | intron            |
| AT5G18610 | na                                  | Protein kinase s   | 5_6189628  | 5.67 | proximal promoter |
| AT5G46170 | na                                  | F-box family prc   | 5_18716981 | 5.67 | promoter          |
| AT3G27845 | na                                  | pre-tRNA; tRNA     | 3_10324713 | 5.67 | downstream        |
| AT5G41401 | na                                  | This gene encod    | 5_16572144 | 5.67 | exon              |
| AT4G36010 | na                                  | Pathogenesis-rr    | 4_17039577 | 5.67 | exon              |
| AT4G22200 | POTASSIUM TRANSPORT 2/3 (KT2/3)     | Encodes AKT2,      | 4_11750301 | 5.67 | five_prime_UTR    |
| AT3G27850 | RIBOSOMAL PROTEIN L12-C (RPL12-C)   | 50S ribosomal r    | 3_10324713 | 5.67 | promoter          |
| AT2G26770 | STOMATAL CLOSURE-RELATED ACTIN      | Encodes a plan     | 2_11408516 | 5.67 | promoter          |
| AT3G11415 | na                                  | na                 | 3_3589489  | 5.66 | exon              |
| AT3G47610 | na                                  | transcription rec  | 3_17547141 | 5.66 | proximal promoter |
| AT3G50550 | na                                  | unknown protei     | 3_18760876 | 5.66 | intergenic        |
| AT3G50560 | na                                  | NAD(P)-binding     | 3_18760876 | 5.66 | downstream        |
| AT1G51090 | na                                  | Heavy metal tra    | 1_18932694 | 5.66 | promoter          |
| AT3G61820 | na                                  | Eukaryotic aspa    | 3_22881944 | 5.66 | promoter          |
| AT3G61825 | na                                  | pre-tRNA; tRNA     | 3_22881944 | 5.66 | downstream        |
| AT5G59450 | na                                  | GRAS family tra    | 5_23974604 | 5.66 | promoter          |
| AT4G35930 | F-BOX STRESS INDUCED 4 (FBS4)       | F-box family prc   | 4_17021303 | 5.65 | intergenic        |
| AT3G24520 | HEAT SHOCK TRANSCRIPTION FACTOR     | member of Heat     | 3_8941247  | 5.65 | five_prime_UTR    |
| AT4G11820 | HYDROXYMETHYLGLUTARYL-COA SYN       | Encodes a prote    | 4_7112523  | 5.65 | promoter          |
| AT1G15580 | INDOLE-3-ACETIC ACID INDUCIBLE 5 (I | auxin induced p    | 1_5366683  | 5.65 | promoter          |
| AT2G43290 | MULTICOPY SUPPRESSORS OF SNF4 (     | Encodes calmo      | 2_17993784 | 5.65 | proximal promoter |
| AT5G11460 | na                                  | Protein of unkn    | 5_3661984  | 5.65 | intergenic        |
| AT1G27050 | na                                  | Encodes a prote    | 1_9393541  | 5.65 | promoter          |
| AT4G35940 | na                                  | unknown protei     | 4_17021303 | 5.65 | promoter          |
| AT2G47890 | na                                  | B-box type zinc    | 2_19608051 | 5.65 | five_prime_UTR    |
| AT3G24518 | na                                  | Potential natura   | 3_8941247  | 5.65 | five_prime_UTR    |
| AT3G06770 | na                                  | Pectin lyase-like  | 3_2137524  | 5.65 | promoter          |
| AT4G14743 | na                                  | pseudogene, hy     | 4_8459437  | 5.65 | proximal promoter |
| AT4G11990 | na                                  | Cell cycle regul   | 4_7190047  | 5.65 | promoter          |
| AT4G16442 | na                                  | Uncharacterise     | 4_9274296  | 5.65 | proximal promoter |
| AT4G16444 | na                                  | FUNCTIONS IN       | 4_9274296  | 5.65 | downstream        |
| AT2G38120 | AUXIN RESISTANT 1 (AUX1)            | Encodes an aux     | 2_15969738 | 5.64 | intergenic        |
| AT5G54150 | na                                  | unknown protei     | 5_21979825 | 5.64 | proximal promoter |
| AT1G25480 | na                                  | Aluminium activ    | 1_8947602  | 5.64 | proximal promoter |
| AT1G79040 | PHOTOSYSTEM II SUBUNIT R (PSBR)     | Encodes for the    | 1_29735811 | 5.64 | promoter          |
| AT1G53230 | TEOSINTE BRANCHED 1, CYCLOIDEA A    | Encodes a mem      | 1_19853432 | 5.64 | proximal promoter |
| AT3G26420 | (ATRZ-1A)                           | Zinc finger-cont   | 3_9676482  | 5.63 | intergenic        |
| AT3G61050 | (NTMC2T4)                           | Encodes a nove     | 3_22601834 | 5.63 | intergenic        |
| AT5G21920 | (YLMG2)                             | YLMG2; FUNC        | 5_7242931  | 5.63 | promoter          |
| AT3G51860 | CATION EXCHANGER 3 (CAX3)           | cation exchange    | 3_19240113 | 5.63 | intron            |
| AT4G30340 | DIACYLGLYCEROL KINASE 7 (DGK7)      | encodes a diacy    | 4_14843771 | 5.63 | proximal promoter |
| AT2G47585 | MICRORNA164A (MIR164A)              | Encodes a micr     | 2_19519355 | 5.63 | proximal promoter |
| AT3G26440 | na                                  | Protein of unkn    | 3_9676482  | 5.63 | promoter          |
| AT3G26430 | na                                  | GDSL-like Lipa     | 3_9676482  | 5.63 | intergenic        |
| AT1G48430 | na                                  | Dihydroxyaceto     | 1_17906973 | 5.63 | promoter          |
| AT1G48440 | na                                  | B-cell receptor-   | 1_17906973 | 5.63 | promoter          |
| AT1G13880 | na                                  | ELM2 domain-c      | 1_4748809  | 5.63 | promoter          |
| AT3G02832 | na                                  | na                 | 3_617527   | 5.63 | downstream        |
| AT3G62240 | na                                  | RING/U-box su      | 3_23036944 | 5.63 | promoter          |
| AT3G62245 | na                                  | pre-tRNA; tRNA     | 3_23036944 | 5.63 | exon              |
| AT5G38520 | na                                  | alpha/beta-Hydr    | 5_15423594 | 5.63 | downstream        |
| AT5G21930 | P-TYPE ATPASE OF ARABIDOPSIS 2 (P)  | P-Type ATPase      | 5_7242931  | 5.63 | promoter          |
| AT3G61060 | PHLOEM PROTEIN 2-A13 (PP2-A13)      | phloem protein :   | 3_22601834 | 5.63 | proximal promoter |
| AT5G38530 | TRYPTOPHAN SYNTHASE BETA TYPE 2     | TSBtype2 encod     | 5_15423594 | 5.63 | promoter          |
| AT3G62250 | UBIQUITIN 5 (UBQ5)                  | ubiquitin 5 (UB    | 3_23036944 | 5.63 | promoter          |
| AT3G02830 | ZINC FINGER PROTEIN 1 (ZFN1)        | Encodes a zinc     | 3_617527   | 5.63 | intergenic        |
| AT3G12740 | ALA-INTERACTING SUBUNIT 1 (ALIS1)   | Physically inter   | 3_4049376  | 5.62 | promoter          |
| AT5G46690 | BETA HLH PROTEIN 71 (bHLH071)       | beta HLH protei    | 5_18947104 | 5.62 | intron            |
| AT5G27420 | CARBON/NITROGEN INSENSITIVE 1 (CN   | Encodes CNH1 (     | 5_9683910  | 5.62 | promoter          |
| AT3G01370 | CRM FAMILY MEMBER 2 (CFM2)          | Encodes a prote    | 3_138891   | 5.62 | promoter          |
| AT5G14570 | HIGH AFFINITY NITRATE TRANSPORTE    | Encodes ATNR       | 5_4695768  | 5.62 | exon              |
| AT3G13405 | MICRORNA169A (MIR169A)              | Encodes a micr     | 3_4360159  | 5.62 | proximal promoter |
| AT5G14565 | MICRORNA398C (MIR398C)              | Encodes a micr     | 5_4695768  | 5.62 | exon              |
| AT3G01360 | na                                  | Family of unkn     | 3_138891   | 5.62 | promoter          |
| AT1G67880 | na                                  | beta-1,4-N-acet    | 1_25455787 | 5.62 | promoter          |
| AT1G09310 | na                                  | Protein of unkn    | 1_3008495  | 5.62 | proximal promoter |
| AT3G57210 | na                                  | Protein of unkn    | 3_21174385 | 5.62 | promoter          |
| AT3G57220 | na                                  | Glycosyl transfe   | 3_21174385 | 5.62 | promoter          |
| AT4G14420 | na                                  | HR-like lesion-ir  | 4_8303929  | 5.62 | promoter          |
| AT3G18780 | ACTIN 2 (ACT2)                      | Encodes an act     | 3_6474724  | 5.61 | promoter          |
| AT2G39990 | EUKARYOTIC TRANSLATION INITIATION   | translation initia | 2_16696886 | 5.61 | intergenic        |
| AT1G79840 | GLABRA 2 (GL2)                      | Glabra 2, a hor    | 1_30036740 | 5.61 | promoter          |
| AT4G37740 | GROWTH-REGULATING FACTOR 2 (GR      | Growth regulatir   | 4_17730917 | 5.61 | intergenic        |
| AT1G06390 | GSK3/SHAGGY-LIKE PROTEIN KINASE     | encodes a GSK      | 1_1946797  | 5.61 | five_prime_UTR    |
| AT1G18570 | MYB DOMAIN PROTEIN 51 (MYB51)       | Encodes a mem      | 1_6391034  | 5.61 | three_prime_UTR   |
| AT5G57610 | na                                  | Protein kinase s   | 5_23324565 | 5.61 | promoter          |
| AT3G06125 | na                                  | Unknown gene       | 3_1848775  | 5.61 | promoter          |
| AT3G18779 | na                                  | unknown protei     | 3_6474724  | 5.61 | promoter          |
| AT3G32389 | na                                  | transposable elk   | 3_13330926 | 5.61 | proximal promoter |
| AT1G01830 | na                                  | ARM repeat sur     | 1_301054   | 5.61 | intron            |
| AT2G42300 | na                                  | basic helix-loop   | 2_17624239 | 5.61 | intron            |
| AT2G42310 | na                                  | unknown protei     | 2_17624239 | 5.61 | proximal promoter |
| AT2G21220 | na                                  | SAUR-like auxi     | 2_9090362  | 5.61 | intergenic        |
| AT2G42040 | na                                  | CONTAINS Inte      | 2_17544284 | 5.61 | intron            |
| AT4G39160 | na                                  | Homeodomain-l      | 4_18236271 | 5.61 | promoter          |
| AT5G15990 | na                                  | transposable elk   | 5_5216061  | 5.61 | proximal promoter |
| AT5G64505 | na                                  | pre-tRNA; tRNA     | 5_25784269 | 5.61 | downstream        |
| AT2G01500 | PRETTY FEW SEEDS 2 (PFS2)           | PFS2 encodes :     | 2_227204   | 5.61 | proximal promoter |
| AT3G23820 | UDP-D-GLUCURONATE 4-EPIMERASE (     | UDP-D-glucuroi     | 3_8597282  | 5.61 | intergenic        |
| AT1G24625 | ZINC FINGER PROTEIN 7 (ZFP7)        | Encodes a zinc     | 1_8727830  | 5.61 | proximal promoter |
| AT2G44740 | CYCLIN P4;1 (CYCP4;1)               | cyclin p4;1 (CY    | 2_18445009 | 5.61 | proximal promoter |
| AT1G17220 | FU-GAERI1 (FUG1)                    | Encodes a chloi    | 1_5884907  | 5.6  | promoter          |

|           |                                    |                   |             |      |                   |
|-----------|------------------------------------|-------------------|-------------|------|-------------------|
| AT1G17210 | IAP-LIKE PROTEIN 1 (ILP1)          | IAP-like protein  | 1_5884907   | 5.6  | promoter          |
| AT1G77690 | LIKE AUX1 3 (LAX3)                 | Encodes an aux    | 1_29203514  | 5.6  | promoter          |
| AT3G52510 | na                                 | F-box associate   | 3_19469277  | 5.6  | intergenic        |
| AT5G61530 | na                                 | small G protein   | 5_24741977  | 5.6  | promoter          |
| AT1G09440 | na                                 | Protein kinase s  | 1_3047564   | 5.6  | intron            |
| AT3G13440 | na                                 | S-adenosyl-L-m    | 3_4379755   | 5.6  | downstream        |
| AT2G28150 | na                                 | FUNCTIONS IN      | 2_11999782  | 5.6  | promoter          |
| AT3G46610 | na                                 | Pentatricopeptic  | 3_17163371  | 5.6  | proximal promoter |
| AT4G36550 | na                                 | ARM repeat sur    | 4_17248595  | 5.6  | promoter          |
| AT1G22530 | PATELLIN 2 (PATL2)                 | PATELLIN 2 (P     | 1_7958494   | 5.6  | promoter          |
| AT5G08590 | SNF1-RELATED PROTEIN KINASE 2.1 (S | Encodes a merr    | 5_2783235   | 5.6  | promoter          |
| AT3G13445 | TATA BINDING PROTEIN 1 (TBP1)      | TBP (TATA binc    | 3_4379755   | 5.6  | promoter          |
| AT1G45130 | BETA-GALACTOSIDASE 5 (BGAL5)       | beta-galactosid   | 1_17062567  | 5.59 | proximal promoter |
| AT2G28260 | CYCLIC NUCLEOTIDE-GATED CHANNEL    | member of Cycl    | 2_12049939  | 5.59 | promoter          |
| AT5G54500 | FLAVODOXIN-LIKE QUINONE REDUCTA    | Encodes a flaviv  | 5_22124356  | 5.59 | promoter          |
| AT4G23050 | na                                 | PAS domain-co     | 4_12079847  | 5.59 | promoter          |
| AT2G40640 | na                                 | RING/U-box suj    | 2_16963223  | 5.59 | promoter          |
| AT2G40650 | na                                 | PRP38 family pi   | 2_16963223  | 5.59 | downstream        |
| AT1G79030 | na                                 | Chaperone Dna     | 1_29734460  | 5.59 | proximal promoter |
| AT3G16180 | na                                 | Major facilitator | 3_5483815   | 5.59 | intron            |
| AT4G13530 | na                                 | unknown proteir   | 4_7866608   | 5.59 | promoter          |
| AT4G35300 | TONOPLAST MONOSACCHARIDE TRAN      | tonoplast mono    | 4_16799772  | 5.59 | intron            |
| AT2G31230 | ETHYLENE-RESPONSIVE ELEMENT BIN    | encodes a mem     | 2_13307731  | 5.58 | promoter          |
| AT5G49300 | GATA TRANSCRIPTION FACTOR 16 (GA   | Encodes a merr    | 5_19985850  | 5.58 | promoter          |
| AT1G30135 | JASMONATE-ZIM-DOMAIN PROTEIN 8 (   | jasmonate-zim-    | 1_10596384  | 5.58 | promoter          |
| AT1G62035 | MICRORNA171C (MIR171C)             | Encodes a micr    | 1_22931493  | 5.58 | proximal promoter |
| AT3G48240 | na                                 | Octicosapeptide   | 3_17868260  | 5.58 | three_prime_UTR   |
| AT4G33540 | na                                 | metallo-beta-lac  | 4_16130616  | 5.58 | promoter          |
| AT1G11410 | na                                 | S-locus lectin pi | 1_3841097   | 5.58 | promoter          |
| AT3G20260 | na                                 | FUNCTIONS IN      | 3_7066783   | 5.58 | promoter          |
| AT3G01310 | na                                 | Phosphoglycer     | 3_102005    | 5.58 | promoter          |
| AT5G46710 | na                                 | PLATZ transcrip   | 5_18954705  | 5.58 | promoter          |
| AT3G46030 | (HTB11)                            | HTB11; FUNCT      | 3_16914364  | 5.57 | promoter          |
| AT5G01550 | LECTIN RECEPTOR KINASE A4.1 (LECR  | Encodes LecRk     | 5_218014    | 5.57 | proximal promoter |
| AT5G01560 | LECTIN RECEPTOR KINASE A4.3 (LECR  | Encodes LecRk     | 5_218014    | 5.57 | downstream        |
| AT3G14810 | MECHANOSENSITIVE CHANNEL OF SM     | mechanosensiti    | 3_4976085   | 5.57 | proximal promoter |
| AT3G09670 | na                                 | Tudor/PWWP/M      | 3_2966350   | 5.57 | promoter          |
| AT2G40980 | na                                 | Protein kinase s  | 2_17101455  | 5.57 | proximal promoter |
| AT3G46020 | na                                 | RNA-binding (R    | 3_16914364  | 5.57 | proximal promoter |
| AT4G38480 | na                                 | Transducin/WD     | 4_18003809  | 5.57 | promoter          |
| AT3G46040 | RIBOSOMAL PROTEIN S15A D (RPS15A   | Regulated by Tl   | 3_16914364  | 5.57 | promoter          |
| AT1G12950 | ROOT HAIR SPECIFIC 2 (RSH2)        | root hair specifi | 1_4419242   | 5.57 | proximal promoter |
| AT4G38470 | SERINE/THREONINE/TYROSINE KINASE   | ACT-like proteir  | 4_18003809  | 5.57 | downstream        |
| AT1G14000 | VH1-INTERACTING KINASE (VIK)       | Encodes a prot    | 1_4796805   | 5.57 | proximal promoter |
| AT5G45010 | DSS1 HOMOLOG ON CHROMOSOME V       | DSS1 homolog      | 5_18168492  | 5.56 | promoter          |
| AT3G62660 | GALACTURONOSYLTRANSFERASE-LIK      | Encodes a prot    | 3_23175674  | 5.56 | intergenic        |
| AT1G73390 | na                                 | Endosomal targ    | 1_27596180  | 5.56 | proximal promoter |
| AT4G02055 | na                                 | pre-tRNA; tRNA    | 4_901240    | 5.56 | exon              |
| AT5G65650 | na                                 | Protein of unkn   | 5_26242199  | 5.56 | intergenic        |
| AT2G01840 | na                                 | transposable elk  | 2_379138    | 5.56 | proximal promoter |
| AT2G39710 | na                                 | Encodes a Cyst    | 2_16561560  | 5.56 | downstream        |
| AT4G02060 | PROLIFERA (PRL)                    | Member of the r   | 4_901240    | 5.56 | exon              |
| AT4G02050 | SUGAR TRANSPORTER PROTEIN 7 (ST    | sugar transport   | 4_901240    | 5.56 | promoter          |
| AT2G40610 | EXPANSIN A8 (EXPA8)                | member of Alph    | 2_16951092  | 5.55 | proximal promoter |
| AT1G75680 | GLYCOSYL HYDROLASE 9B7 (GH9B7)     | glycosyl hydrola  | 1_28420000  | 5.55 | promoter          |
| AT3G10920 | MANGANESE SUPEROXIDE DISMUTASI     | manganese sup     | 3_3417889   | 5.55 | promoter          |
| AT4G26542 | na                                 | Potential natura  | 4_13393575  | 5.55 | proximal promoter |
| AT1G01800 | na                                 | NAD(P)-binding    | 1_293099    | 5.55 | promoter          |
| AT1G52780 | na                                 | Protein of unkn   | 1_19658092  | 5.55 | proximal promoter |
| AT3G08030 | na                                 | Protein of unkn   | 3_2564046   | 5.55 | five_prime_UTR    |
| AT3G10915 | na                                 | Reticulon family  | 3_3417889   | 5.55 | promoter          |
| AT5G44290 | na                                 | Protein kinase s  | 5_17839752  | 5.55 | intergenic        |
| AT5G23750 | na                                 | Remorin family    | 5_8009653   | 5.55 | downstream        |
| AT5G44283 | na                                 | pre-tRNA; tRNA    | 5_17839752  | 5.55 | promoter          |
| AT5G44286 | na                                 | snoRNA; snoRT     | 5_17839752  | 5.55 | promoter          |
| AT5G23740 | RIBOSOMAL PROTEIN S11-BETA (RPS1   | Encodes a puta    | 5_8009653   | 5.55 | promoter          |
| AT5G44340 | TUBULIN BETA CHAIN 4 (TUB4)        | beta tubulin gen  | 5_17861714  | 5.55 | proximal promoter |
| AT1G07725 | EXOCYST SUBUNIT EXO70 FAMILY PRC   | A member of E     | 1_2395298   | 5.54 | exon              |
| AT5G13840 | FIZZY-RELATED 3 (FZR3)             | FIZZY-related     | 3_5_4471153 | 5.54 | intron            |
| AT5G13845 | na                                 | pre-tRNA; tRNA    | 5_4471153   | 5.54 | downstream        |
| AT1G07728 | na                                 | Potential natura  | 1_2395298   | 5.54 | promoter          |
| AT3G11390 | na                                 | Cysteine/Histidi  | 3_3569423   | 5.54 | promoter          |
| AT3G13594 | na                                 | unknown proteir   | 3_4441358   | 5.54 | downstream        |
| AT5G47700 | na                                 | 60S acidic ribos  | 5_19329196  | 5.54 | promoter          |
| AT5G13850 | NASCENT POLYPEPTIDE-ASSOCIATED     | nascent polypep   | 5_4471153   | 5.54 | promoter          |
| AT1G30120 | PYRUVATE DEHYDROGENASE E1 BET/     | Encodes a puta    | 1_10586747  | 5.54 | promoter          |
| AT1G24260 | SEPALATA3 (SEP3)                   | Member of the l   | 1_8596575   | 5.54 | promoter          |
| AT3G10280 | 3-KETOACYL-COA SYNTHASE 14 (KCS1   | Encodes KCS1-     | 3_3182470   | 5.53 | intergenic        |
| AT2G45430 | AT-HOOK MOTIF NUCLEAR-LOCALIZED    | Encodes a nucl    | 2_18724390  | 5.53 | intergenic        |
| AT2G39350 | ATP-BINDING CASSETTE G1 (ABC G1)   | ABC-2 type tran   | 2_16435444  | 5.53 | proximal promoter |
| AT2G37590 | DNA BINDING WITH ONE FINGER 2.4 (D | DNA binding wit   | 2_15771686  | 5.53 | intergenic        |
| AT3G10282 | na                                 | unknown pseud     | 3_3182470   | 5.53 | intron            |
| AT2G46600 | na                                 | Calcium-binding   | 2_19135829  | 5.53 | promoter          |
| AT4G39140 | na                                 | RING/U-box suj    | 4_18233258  | 5.53 | proximal promoter |
| AT5G41040 | na                                 | Encodes a ferul   | 5_16430389  | 5.53 | proximal promoter |
| AT2G23310 | (ATRER1C1)                         | Encodes AtREF     | 2_9916658   | 5.52 | proximal promoter |
| AT5G52570 | BETA-CAROTENE HYDROXYLASE 2 (BE    | Converts &#94f    | 5_21337272  | 5.52 | promoter          |
| AT3G25500 | FORMIN HOMOLOG 1 (AFH1)            | Poly-L-proline-c  | 3_9255100   | 5.52 | promoter          |
| AT5G41905 | MICRORNA166E (MIR166E)             | Encodes a micr    | 5_16772664  | 5.52 | intergenic        |
| AT3G18210 | na                                 | 2-oxoglutarate    | ( 3_6240750 | 5.52 | promoter          |
| AT3G18215 | na                                 | Protein of unkn   | 3_6240750   | 5.52 | promoter          |
| AT5G52580 | na                                 | RabGAP/TBC d      | 5_21337272  | 5.52 | proximal promoter |
| AT5G55860 | na                                 | Plant protein of  | 5_22609116  | 5.52 | promoter          |
| AT2G23300 | na                                 | Leucine-rich rep  | 2_9916658   | 5.52 | exon              |

|           |                                             |                              |      |                   |
|-----------|---------------------------------------------|------------------------------|------|-------------------|
| AT2G29280 | na                                          | pseudogene, trc 2_12585574   | 5.52 | promoter          |
| AT2G29290 | na                                          | NAD(P)-binding 2_12585574    | 5.52 | promoter          |
| AT2G38330 | na                                          | MATE efflux fan 2_16063787   | 5.52 | proximal promoter |
| AT4G08871 | na                                          | transposable elk 4_5650106   | 5.52 | proximal promoter |
| AT4G28775 | na                                          | unknown proteir 4_14215525   | 5.52 | downstream        |
| AT4G28780 | na                                          | GDSL-like Lipas 4_14215525   | 5.52 | promoter          |
| AT5G57100 | na                                          | Nucleotide/sugc 5_23109035   | 5.52 | promoter          |
| AT1G58250 | SABRE (SAB)                                 | SABRE, putativ 1_21601703    | 5.52 | promoter          |
| AT2G28630 | 3-KETOACYL-COA SYNTHASE 12 (KCS1)           | Encodes KCS1: 2_12274961     | 5.51 | intergenic        |
| AT4G12730 | FASCICLIN-LIKE ARABINOGLACTAN 2             | AF333971 Arab 4_7491393      | 5.51 | three_prime_UTR   |
| AT2G37090 | IRREGULAR XYLEM 9 (IRX9)                    | The IRX9 gene 2_15587241     | 5.51 | downstream        |
| AT5G58850 | MYB DOMAIN PROTEIN 119 (MYB119)             | Encodes a puta 5_23762561    | 5.51 | proximal promoter |
| AT1G75170 | na                                          | Sec14p-like phc 1_28213788   | 5.51 | promoter          |
| AT4G33920 | na                                          | Protein phosph 4_16260597    | 5.51 | promoter          |
| AT1G74640 | na                                          | alpha/beta-Hydr 1_28035645   | 5.51 | intergenic        |
| AT1G62370 | na                                          | RING/U-box suj 1_23077280    | 5.51 | intergenic        |
| AT5G24810 | na                                          | ABC1 family prc 5_8522863    | 5.51 | promoter          |
| AT5G54720 | na                                          | Ankyrin repeat f 5_22233420  | 5.51 | promoter          |
| AT1G14860 | NUDIX HYDROLASE HOMOLOG 18 (NUI1)           | nudix hydrolase 1_5126415    | 5.51 | intergenic        |
| AT4G03510 | RING MEMBRANE-ANCHOR 1 (RMA1)               | RMA1 encodes 4_1560623       | 5.51 | proximal promoter |
| AT2G37080 | ROP INTERACTIVE PARTNER 3 (RIP3)            | Encodes RIP3 ( 2_15587241    | 5.51 | proximal promoter |
| AT4G02380 | SENESCENCE-ASSOCIATED GENE 21 (SAG21)       | Encodes AtLEA 4_1047953      | 5.51 | proximal promoter |
| AT5G24030 | SLAC1 HOMOLOGUE 3 (SLAH3)                   | Encodes a prot 5_8122887     | 5.51 | promoter          |
| AT4G14960 | TUBULIN ALPHA-6 (TUAG6)                     | Encodes an alp 4_8550550     | 5.51 | promoter          |
| AT4G11140 | CYTOKININ RESPONSE FACTOR 1 (CRF1)          | encodes a mem 4_6793640      | 5.5  | intergenic        |
| AT1G11710 | na                                          | Pentatricopeptic 1_3951109   | 5.5  | three_prime_UTR   |
| AT1G18940 | na                                          | Nodulin-like / Mi 1_6543703  | 5.5  | promoter          |
| AT1G02475 | na                                          | Polyketide cycl 1_515481     | 5.5  | promoter          |
| AT1G02480 | na                                          | pre-tRNA; tRNA 1_515481      | 5.5  | promoter          |
| AT4G36808 | na                                          | Potential natura 4_17342927  | 5.5  | intergenic        |
| AT1G25440 | na                                          | B-box type zinc 1_8935586    | 5.5  | promoter          |
| AT3G28040 | na                                          | Leucine-rich rec 3_10434970  | 5.5  | promoter          |
| AT4G36800 | RUB1 CONJUGATING ENZYME 1 (RCE1)            | RUB1 conjugati 4_17342927    | 5.5  | promoter          |
| AT1G11720 | STARCH SYNTHASE 3 (SS3)                     | Encodes a starc 1_3951109    | 5.5  | promoter          |
| AT4G16265 | (NRPB9B)                                    | One of two high 4_9204212    | 5.49 | promoter          |
| AT2G25090 | CBL-INTERACTING PROTEIN KINASE 16           | Encodes a merr 2_10673314    | 5.49 | proximal promoter |
| AT3G20770 | ETHYLENE-INSENSITIVE3 (EIN3)                | Encodes EIN3 ( 3_7263230     | 5.49 | five_prime_UTR    |
| AT2G29980 | FATTY ACID DESATURASE 3 (FAD3)              | Endoplasmic re 2_12783723    | 5.49 | intron            |
| AT5G65710 | HAESA-LIKE 2 (HSL2)                         | HAESA-like 2 (f 5_26288297   | 5.49 | intergenic        |
| AT5G57030 | LUTEIN DEFICIENT 2 (LUT2)                   | Lutein-deficient 5_23077087  | 5.49 | promoter          |
| AT5G57020 | MYRISTOYL-COA:PROTEIN N-MYRISTOYL           | Arabidopsis thal 5_23077087  | 5.49 | downstream        |
| AT1G74840 | na                                          | Homeodomain-l 1_28117456     | 5.49 | promoter          |
| AT2G23808 | na                                          | pseudogene of 1_210137507    | 5.49 | intergenic        |
| AT2G05760 | na                                          | Xanthine/uracil 1_2180650    | 5.49 | promoter          |
| AT4G14746 | na                                          | CONTAINS Inte 4_8467123      | 5.49 | proximal promoter |
| AT4G15420 | na                                          | Ubiquitin fusio 4_8826240    | 5.49 | downstream        |
| AT4G15430 | na                                          | ERD (early-res; 4_8826240    | 5.49 | proximal promoter |
| AT5G07940 | na                                          | BEST Arabidop: 5_2533540     | 5.49 | promoter          |
| AT1G71100 | RADIAL SWELLING 10 (RSW10)                  | Encodes a ribos 1_26815671   | 5.49 | intron            |
| AT2G23810 | TETRASPANIN8 (TET8)                         | Member of TET 2_10137507     | 5.49 | five_prime_UTR    |
| AT3G20780 | TOPOISOMERASE 6 SUBUNIT B (TOP6B)           | Encodes putativ 3_7263230    | 5.49 | intergenic        |
| AT5G04490 | VITAMIN E PATHWAY GENE 5 (VTE5)             | Encodes a prot 5_1279695     | 5.49 | promoter          |
| AT1G30825 | DISTORTED TRICHOMES 2 (DIS2)                | Involved in trich 1_10956460 | 5.48 | intergenic        |
| AT2G28110 | FRAGILE FIBER 8 (FRA8)                      | Homolog to AtE 2_11978110    | 5.48 | exon              |
| AT1G70300 | K+ UPTAKE PERMEASE 6 (KUP6)                 | potassium trans 1_26483303   | 5.48 | proximal promoter |
| AT3G54460 | na                                          | SNF2 domain-c 3_20167520     | 5.48 | promoter          |
| AT2G36080 | na                                          | Encodes a plan 2_15150376    | 5.48 | intron            |
| AT4G32920 | na                                          | glycine-rich prot 4_15887247 | 5.48 | downstream        |
| AT4G32915 | na                                          | FUNCTIONS IN 4_15887247      | 5.48 | intergenic        |
| AT1G54120 | na                                          | unknown proteir 1_20206730   | 5.48 | promoter          |
| AT1G70150 | na                                          | zinc ion binding; 1_26419799 | 5.48 | downstream        |
| AT1G70160 | na                                          | unknown proteir 1_26419799   | 5.48 | promoter          |
| AT3G04020 | na                                          | unknown proteir 3_1040443    | 5.48 | promoter          |
| AT4G36370 | na                                          | unknown proteir 4_17184482   | 5.48 | proximal promoter |
| AT5G44070 | CADMIUM SENSITIVE 1 (CAD1)                  | Phytochelatin s 5_17734343   | 5.47 | promoter          |
| AT2G05790 | na                                          | O-Glycosyl hydi 2_2201092    | 5.47 | intron            |
| AT2G05800 | na                                          | transposable elk 2_2201092   | 5.47 | proximal promoter |
| AT4G24790 | na                                          | AAA-type ATPa 4_12777532     | 5.47 | promoter          |
| AT2G31110 | na                                          | Encodes a merr 2_13263532    | 5.47 | proximal promoter |
| AT1G03457 | na                                          | RNA-binding (R 1_864287      | 5.47 | promoter          |
| AT2G31130 | na                                          | unknown proteir 2_13263532   | 5.47 | downstream        |
| AT5G43940 | SENSITIVE TO HOT TEMPERATURES 5             | Encodes a gluta 5_17684073   | 5.47 | promoter          |
| AT2G30010 | TRICHOME BIREFRINGENCE-LIKE 45 (TBL45)      | Encodes a merr 2_12808738    | 5.47 | intron            |
| AT2G47260 | WRKY DNA-BINDING PROTEIN 23 (WRKY23)        | Encodes a merr 2_19406776    | 5.47 | five_prime_UTR    |
| AT1G35670 | CALCIUM-DEPENDENT PROTEIN KINASE 10 (CPK10) | Encodes a Ca(2 1_13203617    | 5.46 | proximal promoter |
| AT1G11680 | CYTOCHROME P450 51G1 (CYP51G1)              | putative obtusif 1_3937562   | 5.46 | proximal promoter |
| AT5G24530 | DOWNY MILDEW RESISTANT 6 (DMR6)             | Encodes a puta 5_8381576     | 5.46 | intron            |
| AT4G37890 | EMBRYO SAC DEVELOPMENT ARREST 1 (ESA1)      | embryo sac dev 4_17813520    | 5.46 | exon              |
| AT2G47240 | LONG-CHAIN ACYL-COA SYNTHASE 1 (LACS1)      | Encodes an acy 2_19395318    | 5.46 | intron            |
| AT4G37895 | na                                          | Potential natura 4_17813520  | 5.46 | promoter          |
| AT1G08230 | na                                          | Codes for a H+ 1_2586155     | 5.46 | intron            |
| AT1G18720 | na                                          | Protein of unkn 1_6459129    | 5.46 | intron            |
| AT5G17490 | RGA-LIKE PROTEIN 3 (RGL3)                   | DELLA subfami 5_5764211      | 5.46 | three_prime_UTR   |
| AT2G46800 | ZINC TRANSPORTER OF ARABIDOPSIS 1 (ZAT1)    | Encodes a merr 2_19237407    | 5.46 | promoter          |
| AT1G22880 | CELLULOSE 5 (CEL5)                          | cellulase 5 (CEI 1_8098145   | 5.45 | intergenic        |
| AT3G22820 | CHALLAH-LIKE 1 (CLL1)                       | allergen-related 3_8072671   | 5.45 | intergenic        |
| AT1G03310 | DEBRANCHING ENZYME 1 (DBE1)                 | Encodes a prot 1_813305      | 5.45 | promoter          |
| AT2G35860 | FASCICLIN-LIKE ARABINOGLACTAN P             | FASCICLIN-like 2_15059721    | 5.45 | promoter          |
| AT4G18880 | HEAT SHOCK TRANSCRIPTION FACTOR 1 (HSF1)    | member of Heat 4_10349635    | 5.45 | promoter          |
| AT2G35859 | na                                          | Potential natura 2_15059721  | 5.45 | exon              |
| AT1G02070 | na                                          | unknown proteir 1_368349     | 5.45 | intergenic        |
| AT1G14820 | na                                          | Sec14p-like phc 1_5106959    | 5.45 | promoter          |
| AT2G39420 | na                                          | alpha/beta-Hydr 2_16460238   | 5.45 | promoter          |
| AT1G22882 | na                                          | Galactose-bindi 1_8098145    | 5.45 | proximal promoter |

|           |                                                        |                   |             |      |                   |
|-----------|--------------------------------------------------------|-------------------|-------------|------|-------------------|
| AT1G19050 | RESPONSE REGULATOR 7 (ARR7)                            | Encodes a merr    | 1_6579378   | 5.45 | promoter          |
| AT3G50740 | UDP-GLUCOSYL TRANSFERASE 72E1 (UGT72E1)                | is an             | 3_18859431  | 5.45 | proximal promoter |
| AT3G04910 | WITH NO LYSINE (K) KINASE 1 (WNK1)                     | Serine/threonine  | 3_1354724   | 5.45 | five_prime_UTR    |
| AT3G28860 | ATP-BINDING CASSETTE B19 (ABCB19)                      | Belongs to the f  | 3_10876131  | 5.44 | intron            |
| AT5G51990 | C-REPEAT-BINDING FACTOR 4 (CBF4)                       | encodes a mem     | 5_21116408  | 5.44 | intergenic        |
| AT2G47180 | GALACTINOL SYNTHASE 1 (GolS1)                          | GolS1 is a galac  | 2_19371310  | 5.44 | proximal promoter |
| AT4G02130 | GALACTURONOSYLTRANSFERASE 6 (GAL6T6)                   | Encodes a prot    | 4_945408    | 5.44 | intron            |
| AT4G32690 | HEMOGLOBIN 3 (GLB3)                                    | Encodes a hem     | 4_15765244  | 5.44 | promoter          |
| AT5G45307 | MICRORNA168B (MIR168B)                                 | Encodes a micr    | 5_18359089  | 5.44 | promoter          |
| AT5G45310 | na                                                     | unknown protei    | 5_18359089  | 5.44 | downstream        |
| AT2G45300 | na                                                     | encodes 3-phos    | 2_18677233  | 5.44 | promoter          |
| AT5G08240 | na                                                     | unknown protei    | 5_2651109   | 5.44 | three_prime_UTR   |
| AT5G42440 | na                                                     | Protein kinase s  | 5_16974626  | 5.44 | promoter          |
| AT4G16141 | na                                                     | GATA type zinc    | 4_9131363   | 5.44 | intergenic        |
| AT1G17850 | na                                                     | Rhodanese/Cel     | 1_6149163   | 5.44 | promoter          |
| AT1G17860 | na                                                     | Kunitz family try | 1_6149163   | 5.44 | promoter          |
| AT1G32360 | na                                                     | Zinc finger (CC   | 1_11671589  | 5.44 | proximal promoter |
| AT3G12835 | na                                                     | unknown protei    | 3_4082762   | 5.44 | intergenic        |
| AT4G32680 | na                                                     | unknown protei    | 4_15765244  | 5.44 | promoter          |
| AT5G40150 | na                                                     | Peroxidase sup    | 5_16060849  | 5.44 | five_prime_UTR    |
| AT5G51980 | na                                                     | Transducin/WD     | 5_21116408  | 5.44 | promoter          |
| AT5G54380 | THESEUS1 (THE1)                                        | Encodes THESE     | 5_22082658  | 5.44 | proximal promoter |
| AT1G24120 | ARG1-LIKE 1 (ARL1)                                     | encodes a Dna.    | 1_8532242   | 5.43 | promoter          |
| AT2G16400 | BEL1-LIKE HOMEODOMAIN 7 (BLH7)                         | BEL1-like home    | 2_7104426   | 5.43 | proximal promoter |
| AT1G64142 | CONSERVED PEPTIDE UPSTREAM OPEN READING FRAME 1 (CUP1) | Upstream open     | 1_23807790  | 5.43 | proximal promoter |
| AT2G37380 | MEMBRANE-ASSOCIATED KINASE REGULATOR 1 (MAKR1)         | Encodes a merr    | 2_15689416  | 5.43 | intergenic        |
| AT4G35490 | MITOCHONDRIAL RIBOSOMAL PROTEIN 1 (MRP1)               | mitochondrial rit | 4_16855355  | 5.43 | proximal promoter |
| AT1G51130 | na                                                     | Nse4, compone     | 1_18942678  | 5.43 | proximal promoter |
| AT1G13470 | na                                                     | Protein of unkn   | 1_4621874   | 5.43 | promoter          |
| AT1G31540 | na                                                     | Disease resist    | 1_11293885  | 5.43 | promoter          |
| AT1G64140 | na                                                     | BEST Arabidop     | 1_23807790  | 5.43 | proximal promoter |
| AT1G27190 | na                                                     | Leucine-rich re   | 1_9446400   | 5.43 | intergenic        |
| AT1G69570 | na                                                     | Dof-type zinc fir | 1_26163437  | 5.43 | five_prime_UTR    |
| AT5G62560 | na                                                     | RING/U-box su     | 5_25109760  | 5.43 | promoter          |
| AT2G45140 | PLANT VAP HOMOLOG 12 (PVA12)                           | Encodes a Plan    | 2_18610830  | 5.43 | five_prime_UTR    |
| AT4G00050 | UNFERTILIZED EMBRYO SAC 10 (UNES10)                    | unfertilized emb  | 4_19001     | 5.43 | intron            |
| AT2G25900 | (ATCTH)                                                | putative Cys3H    | 2_11041762  | 5.42 | five_prime_UTR    |
| AT3G18290 | BRUTUS (BTS)                                           | Encodes BRUT      | 3_6272813   | 5.42 | proximal promoter |
| AT3G61897 | MICRORNA166B (MIR166B)                                 | Encodes a micr    | 3_22921947  | 5.42 | promoter          |
| AT2G39200 | MILDEW RESISTANCE LOCUS O 12 (MLR12)                   | A member of a     | 1_216360099 | 5.42 | promoter          |
| AT4G19420 | na                                                     | Pectinacetyl      | 4_10593223  | 5.42 | proximal promoter |
| AT2G24380 | na                                                     | pre-tRNA; tRNA    | 2_10373564  | 5.42 | promoter          |
| AT2G24390 | na                                                     | AIG2-like (avir   | 2_10373564  | 5.42 | promoter          |
| AT5G07760 | na                                                     | formin homolo     | 5_2467807   | 5.42 | promoter          |
| AT1G10690 | na                                                     | unknown protei    | 1_3550761   | 5.42 | promoter          |
| AT3G55020 | na                                                     | Ypt/Rab-GAP d     | 3_20394906  | 5.42 | five_prime_UTR    |
| AT3G61898 | na                                                     | unknown protei    | 3_22921947  | 5.42 | proximal promoter |
| AT5G06320 | NDR1/HIN1-LIKE 3 (NHL3)                                | encodes a prote   | 5_1931741   | 5.42 | five_prime_UTR    |
| AT5G06310 | PROTECTION OF TELOMERES 1B (ATP1)                      | Encodes AtPOT     | 5_1931741   | 5.42 | intergenic        |
| AT5G53160 | REGULATOR COMPONENTS OF ABA1 (RCA1)                    | Encodes RCAR      | 5_21560617  | 5.42 | promoter          |
| AT3G53232 | ROTUNDIFOLIA LIKE 1 (RTFL1)                            | ROTUNDIFOLIA      | 3_19732233  | 5.42 | proximal promoter |
| AT2G01830 | WOODEN LEG (WOL)                                       | Histidine kinase  | 2_368971    | 5.42 | intron            |
| AT3G54360 | na                                                     | zinc ion binding  | 3_20132174  | 5.41 | promoter          |
| AT3G54363 | na                                                     | This gene encod   | 3_20132174  | 5.41 | downstream        |
| AT1G68400 | na                                                     | leucine-rich rep  | 1_25647447  | 5.41 | intron            |
| AT5G18460 | na                                                     | Protein of Unkn   | 5_6124009   | 5.4  | exon              |
| AT1G62480 | na                                                     | Vacuolar calci    | 1_23126627  | 5.4  | proximal promoter |
| AT3G44100 | na                                                     | MD-2-related lip  | 3_15867536  | 5.4  | promoter          |
| AT5G10745 | na                                                     | unknown protei    | 5_3396377   | 5.4  | promoter          |
| AT4G19390 | na                                                     | Uncharacterise    | 4_10576519  | 5.4  | promoter          |
| AT3G59765 | na                                                     | Unknown gene      | 3_22078335  | 5.4  | exon              |
| AT1G30590 | na                                                     | RNA polymeras     | 1_10840897  | 5.4  | proximal promoter |
| AT1G30600 | na                                                     | Subtilase fami    | 1_10840897  | 5.4  | intergenic        |
| AT5G28770 | (BZO2H3)                                               | bZIP protein BZ   | 5_10799599  | 5.39 | proximal promoter |
| AT5G10860 | CBS DOMAIN CONTAINING PROTEIN 3 (CBP3)                 | Encodes a singl   | 5_3430601   | 5.39 | promoter          |
| AT5G10870 | CHORISMATE MUTASE 2 (CM2)                              | Encodes chorisi   | 5_3430601   | 5.39 | three_prime_UTR   |
| AT3G05120 | GA INSENSITIVE DWARF1A (GID1A)                         | Encodes a gibb    | 3_1430374   | 5.39 | promoter          |
| AT2G24240 | na                                                     | BTB/POZ doma      | 2_10308284  | 5.39 | proximal promoter |
| AT1G12080 | na                                                     | Vacuolar calci    | 1_4082666   | 5.39 | proximal promoter |
| AT1G76870 | na                                                     | BEST Arabidop     | 1_28859503  | 5.39 | intergenic        |
| AT2G19582 | na                                                     | Potential natura  | 2_8475165   | 5.39 | exon              |
| AT5G64400 | na                                                     | BEST Arabidop     | 5_25748652  | 5.39 | promoter          |
| AT5G13390 | NO EXINE FORMATION 1 (NEF1)                            | Required for no   | 5_4292697   | 5.39 | promoter          |
| AT2G33150 | PEROXISOMAL 3-KETOACYL-COA THIOESTERASE 1 (KAT3)       | Encodes an org    | 2_14051433  | 5.39 | promoter          |
| AT2G19580 | TETRASPANIN2 (TET2)                                    | Member of TET     | 2_8475165   | 5.39 | promoter          |
| AT4G19700 | (RING)                                                 | Encodes BOI (E    | 4_10716026  | 5.38 | proximal promoter |
| AT3G07390 | AUXIN-INDUCED IN ROOT CULTURES 1 (AIR1)                | isolated from dif | 3_2364282   | 5.38 | proximal promoter |
| AT5G59570 | BROTHER OF LUX ARRHYTHMO (BOA)                         | Encodes BOA (     | 5_24003782  | 5.38 | promoter          |
| AT1G12840 | DE-ETIOLATED 3 (DET3)                                  | Encodes subun     | 1_4375359   | 5.38 | promoter          |
| AT5G63530 | FARNESYLATED PROTEIN 3 (FP3)                           | Farnesylated pr   | 5_25433136  | 5.38 | promoter          |
| AT5G13630 | GENOMES UNCOUPLED 5 (GUN5)                             | Encodes magn      | 5_4392362   | 5.38 | promoter          |
| AT3G06110 | MAPK PHOSPHATASE 2 (MKP2)                              | Encodes a nucl    | 3_1845047   | 5.38 | downstream        |
| AT3G06120 | MUTE (MUTE)                                            | Encodes a basi    | 3_1845047   | 5.38 | proximal promoter |
| AT4G33467 | na                                                     | unknown protei    | 4_16102323  | 5.38 | promoter          |
| AT1G12830 | na                                                     | unknown protei    | 1_4375359   | 5.38 | promoter          |
| AT2G25870 | na                                                     | haloacid dehalo   | 2_11030841  | 5.38 | promoter          |
| AT3G12170 | na                                                     | Chaperone Dna     | 3_3880759   | 5.38 | promoter          |
| AT4G02550 | na                                                     | unknown protei    | 4_1122240   | 5.38 | promoter          |
| AT5G53410 | na                                                     | unknown protei    | 5_21665466  | 5.38 | proximal promoter |
| AT2G25850 | POLY(A) POLYMERASE 2 (PAPS2)                           | Encodes a poly    | 2_11030841  | 5.38 | promoter          |
| AT4G34870 | ROTAMASE CYCLOPHILIN 5 (ROCS5)                         | belongs to cycl   | 4_16614121  | 5.38 | promoter          |
| AT3G58710 | WRKY DNA-BINDING PROTEIN 69 (WRKY69)                   | member of WR      | 3_21715638  | 5.38 | intron            |
| AT2G38120 | AUXIN RESISTANT 1 (AUX1)                               | Encodes an aux    | 2_15972778  | 5.37 | promoter          |
| AT2G28910 | CAX INTERACTING PROTEIN 4 (CXIP4)                      | Encodes a CAX     | 2_12415662  | 5.37 | downstream        |



|           |                                    |                   |              |      |                   |
|-----------|------------------------------------|-------------------|--------------|------|-------------------|
| AT1G27750 | na                                 | nucleic acid bin  | 1_9662073    | 5.37 | downstream        |
| AT1G27752 | na                                 | Ubiquitin system  | 1_9662073    | 5.37 | promoter          |
| AT1G38149 | na                                 | transposable elk  | 1_14307625   | 5.37 | intergenic        |
| AT1G61353 | na                                 | unknown protei    | n_22636555   | 5.37 | downstream        |
| AT2G31585 | na                                 | Unknown gene      | 2_13447088   | 5.37 | intergenic        |
| AT2G31590 | na                                 | unknown protei    | n_13447088   | 5.37 | exon              |
| AT2G31580 | na                                 | tRNAHis guanyl    | 2_13447088   | 5.37 | proximal promoter |
| AT3G55700 | na                                 | UDP-Glycosyltr    | 3_20669824   | 5.37 | proximal promoter |
| AT2G28900 | OUTER PLASTID ENVELOPE PROTEIN     | Encodes AtOEF     | 2_12415662   | 5.37 | promoter          |
| AT4G30210 | P450 REDUCTASE 2 (ATR2)            | Encodes NADP      | 4_14796759   | 5.37 | promoter          |
| AT4G30220 | SMALL NUCLEAR RIBONUCLEOPROTE      | small nuclear rit | 4_14796759   | 5.37 | intergenic        |
| AT2G02860 | SUCROSE TRANSPORTER 2 (SUT2)       | encodes a sucrt   | 2_832620     | 5.37 | promoter          |
| AT1G14900 | HIGH MOBILITY GROUP A (HMGA)       | Encodes a prote   | 1_5138124    | 5.36 | downstream        |
| AT5G45630 | na                                 | CONTAINS Inte     | 5_18507076   | 5.36 | proximal promoter |
| AT1G68190 | na                                 | B-box zinc finge  | 1_25559124   | 5.36 | promoter          |
| AT1G72100 | na                                 | late embryogeni   | 1_27127837   | 5.36 | exon              |
| AT3G13880 | na                                 | Tetratricopeptid  | 3_4571703    | 5.36 | promoter          |
| AT1G14890 | na                                 | Plant invertase/  | 1_5138124    | 5.36 | downstream        |
| AT4G02720 | na                                 | unknown protei    | 4_1204147    | 5.36 | downstream        |
| AT4G02715 | na                                 | unknown protei    | 4_1204147    | 5.36 | proximal promoter |
| AT5G66530 | na                                 | Galactose muta    | 5_26555958   | 5.36 | promoter          |
| AT5G66535 | na                                 | pre-tRNA; tRNA    | 5_26555958   | 5.36 | downstream        |
| AT2G42600 | PHOSPHOENOLPYRUVATE CARBOXYL       | Encodes one of    | 2_17739032   | 5.36 | five_prime_UTR    |
| AT3G44990 | XYLOGLUCAN ENDO-TRANSGLYCOSYL      | xyloglucan endc   | 3_16448779   | 5.36 | promoter          |
| AT2G28630 | 3-KETOACYL-COA SYNTHASE 12 (KCS1   | Encodes KCS1;     | 2_12280907   | 5.35 | intergenic        |
| AT4G25960 | ATP-BINDING CASSETTE B2 (ABCB2)    | P-glycoprotein    | 2_4_13177344 | 5.35 | promoter          |
| AT3G15850 | FATTY ACID DESATURASE 5 (FAD5)     | Chloroplastic er  | 3_5360362    | 5.35 | intron            |
| AT2G02100 | LOW-MOLECULAR-WEIGHT CYSTEINE-     | Predicted to enc  | 2_528082     | 5.35 | promoter          |
| AT3G61678 | na                                 | This gene encod   | 3_22823423   | 5.35 | exon              |
| AT3G61680 | na                                 | alpha/beta-Hydr   | 3_22823423   | 5.35 | promoter          |
| AT5G07770 | na                                 | Actin-binding Ff  | 5_2474017    | 5.35 | proximal promoter |
| AT1G15420 | na                                 | CONTAINS Inte     | 1_5304249    | 5.35 | proximal promoter |
| AT1G15430 | na                                 | Protein of unkn   | 1_5304249    | 5.35 | promoter          |
| AT1G63820 | na                                 | CCT motif fami    | 1_23685219   | 5.35 | proximal promoter |
| AT1G63830 | na                                 | PLAC8 family p    | 1_23685219   | 5.35 | five_prime_UTR    |
| AT3G15860 | na                                 | FUNCTIONS IN      | 3_5360362    | 5.35 | intergenic        |
| AT1G05675 | na                                 | UDP-Glycosyltr    | 1_1702854    | 5.35 | promoter          |
| AT1G34640 | na                                 | peptidases; FU    | 1_12688596   | 5.35 | promoter          |
| AT2G37020 | na                                 | Translin family   | 2_15549004   | 5.35 | three_prime_UTR   |
| AT2G42020 | na                                 | pre-tRNA; tRNA    | 2_17538860   | 5.35 | promoter          |
| AT2G42030 | na                                 | RING/U-box su     | 2_17538860   | 5.35 | downstream        |
| AT2G37025 | TRF-LIKE 8 (TRFL8)                 | TRF-like 8 (TR    | 2_15549004   | 5.35 | promoter          |
| AT1G05680 | URIDINE DIPHOSPHATE GLYCOSYLTR/    | Encodes a UDF     | 1_1702854    | 5.35 | intergenic        |
| AT1G69740 | (HEMB1)                            | Encodes a puta    | 1_26235836   | 5.34 | intergenic        |
| AT1G68560 | ALPHA-XYLOSIDASE 1 (XYL1)          | Encodes a bifur   | 1_25736456   | 5.34 | intron            |
| AT3G13520 | ARABINOGLACTAN PROTEIN 12 (AGP     | Encodes a GPI-    | 3_4408294    | 5.34 | proximal promoter |
| AT4G17615 | CALCINEURIN B-LIKE PROTEIN 1 (CBL1 | Member of AtCt    | 4_9815305    | 5.34 | proximal promoter |
| AT1G69750 | CYTOCHROME C OXIDASE 19-2 (COX1    | cytochrome c o    | 1_26235836   | 5.34 | five_prime_UTR    |
| AT3G27785 | MYB DOMAIN PROTEIN 118 (MYB118)    | putative transcr  | 3_10291202   | 5.34 | promoter          |
| AT4G23490 | na                                 | Protein of unkn   | 4_12254675   | 5.34 | promoter          |
| AT4G30470 | na                                 | NAD(P)-binding    | 4_14892412   | 5.34 | proximal promoter |
| AT1G70040 | na                                 | Protein of unkn   | 1_26382060   | 5.34 | three_prime_UTR   |
| AT1G70050 | na                                 | pre-tRNA; tRNA    | 1_26382060   | 5.34 | downstream        |
| AT3G01810 | na                                 | FUNCTIONS IN      | 3_288386     | 5.34 | promoter          |
| AT4G08240 | na                                 | unknown protei    | 4_5196643    | 5.34 | intron            |
| AT4G08250 | na                                 | GRAS family tra   | 4_5196643    | 5.34 | promoter          |
| AT4G17612 | na                                 | pre-tRNA; tRNA    | 4_9815305    | 5.34 | promoter          |
| AT5G16220 | na                                 | Octicosapeptid    | 5_5300729    | 5.34 | promoter          |
| AT4G36640 | na                                 | Sec14p-like ph    | 4_17279311   | 5.34 | promoter          |
| AT3G51260 | 20S PROTEASOME ALPHA SUBUNIT P/    | 20S proteosom     | 3_19030907   | 5.33 | promoter          |
| AT1G22600 | na                                 | Late embryog      | 1_7991159    | 5.33 | proximal promoter |
| AT4G27840 | na                                 | SNARE-like su     | 4_13866507   | 5.33 | promoter          |
| AT4G26555 | na                                 | FKBP-like pepti   | 4_13406283   | 5.33 | promoter          |
| AT3G26510 | na                                 | Octicosapeptid    | 3_9710063    | 5.33 | intergenic        |
| AT3G27330 | na                                 | zinc finger (C3   | 3_10119862   | 5.33 | exon              |
| AT3G27340 | na                                 | FUNCTIONS IN      | 3_10119862   | 5.33 | proximal promoter |
| AT3G29805 | na                                 | transposable elk  | 3_11725317   | 5.33 | intergenic        |
| AT3G26511 | na                                 | unknown protei    | 3_9710063    | 5.33 | intergenic        |
| AT4G18205 | na                                 | Nucleotide-su     | 4_10073604   | 5.33 | promoter          |
| AT5G44572 | na                                 | unknown protei    | 5_17969694   | 5.33 | downstream        |
| AT5G44574 | na                                 | unknown protei    | 5_17969694   | 5.33 | proximal promoter |
| AT3G61970 | NGATHA2 (NGA2)                     | NGATHA2 (NG       | 3_22951436   | 5.33 | promoter          |
| AT3G26500 | PLANT INTRACELLULAR RAS GROUP-F    | Encodes PIRL2     | 3_9710063    | 5.33 | promoter          |
| AT4G18197 | PURINE PERMEASE 7 (PUP7)           | Member of a far   | 4_10073604   | 5.33 | intergenic        |
| AT1G66970 | SHV3-LIKE 2 (SVL2)                 | Encodes a merr    | 1_24996613   | 5.33 | promoter          |
| AT3G22420 | WITH NO LYSINE (K) KINASE 2 (WNK2) | Encodes a merr    | 3_7946072    | 5.33 | promoter          |
| AT3G23920 | BETA-AMYLASE 1 (BAM1)              | Encodes a chlo    | 3_8641489    | 5.32 | promoter          |
| AT1G01240 | na                                 | unknown protei    | 1_99810      | 5.32 | promoter          |
| AT4G38310 | na                                 | Galactosyl trans  | 4_17947270   | 5.32 | proximal promoter |
| AT1G29600 | na                                 | Zinc finger C-x   | 8_1_10343370 | 5.32 | proximal promoter |
| AT3G54400 | na                                 | Eukaryotic aspa   | 3_20141715   | 5.32 | intron            |
| AT1G13260 | RELATED TO ABI3/VP1 1 (RAV1)       | Encodes an AP     | 1_4535896    | 5.32 | intergenic        |
| AT4G35000 | ASCORBATE PEROXIDASE 3 (APX3)      | Encodes a micr    | 4_16667710   | 5.31 | five_prime_UTR    |
| AT3G62150 | ATP-BINDING CASSETTE B21 (ABCB21)  | P-glycoprotein    | 2_3_23013974 | 5.31 | promoter          |
| AT1G04400 | CRYPTOCHROME 2 (CRY2)              | Blue light rece   | 1_1188568    | 5.31 | promoter          |
| AT2G47430 | CYTOKININ-INDEPENDENT 1 (CKI1)     | Encodes a puta    | 2_19465294   | 5.31 | proximal promoter |
| AT1G04410 | CYTOSOLIC-NAD-DEPENDENT MALATE     | predicted to enc  | 1_1188568    | 5.31 | intergenic        |
| AT5G43330 | CYTOSOLIC-NAD-DEPENDENT MALATE     | predicted to enc  | 5_17390390   | 5.31 | promoter          |
| AT4G30190 | H(+)-ATPASE 2 (HA2)                | belongs to the F  | 4_14782282   | 5.31 | intergenic        |
| AT1G79310 | METACASPASE 7 (MC7)                | Encodes a puta    | 1_29833863   | 5.31 | promoter          |
| AT1G17940 | na                                 | Endosomal targ    | 1_6174632    | 5.31 | proximal promoter |
| AT1G79290 | na                                 | pre-tRNA; tRNA    | 1_29833863   | 5.31 | intergenic        |
| AT1G79300 | na                                 | pre-tRNA; tRNA    | 1_29833863   | 5.31 | downstream        |
| AT3G62160 | na                                 | HXXXD-type ac     | 3_23013974   | 5.31 | downstream        |

|           |                                  |                              |      |                   |
|-----------|----------------------------------|------------------------------|------|-------------------|
| AT4G18810 | na                               | NAD(P)-binding 4_10325957    | 5.31 | promoter          |
| AT4G18815 | na                               | pre-tRNA; tRNA 4_10325957    | 5.31 | downstream        |
| AT1G79280 | NUCLEAR PORE ANCHOR (NUA)        | Encodes a 237-1_29833863     | 5.31 | proximal promoter |
| AT3G05800 | ATBS1(ACTIVATION-TAGGED BRI1 SUP | AtBS1(activation) 3_1726795  | 5.3  | proximal promoter |
| AT5G41070 | DSRNA-BINDING PROTEIN 5 (DRB5)   | Encodes a dout 5_16438109    | 5.3  | promoter          |
| AT5G39360 | EID1-LIKE 2 (EDL2)               | EID1-like 2 (EDI) 5_15754788 | 5.3  | promoter          |
| AT1G70140 | FORMIN 8 (FH8)                   | Encodes a grou 1_26415371    | 5.3  | promoter          |
| AT5G59505 | MICRORNA172E (MIR172E)           | Encodes a micr 5_23989004    | 5.3  | intergenic        |
| AT2G48000 | na                               | Pentatricopeptic 2_19640991  | 5.3  | promoter          |
| AT2G03020 | na                               | Heat shock prot 2_884296     | 5.3  | promoter          |
| AT1G77640 | na                               | encodes a mem 1_29177273     | 5.3  | proximal promoter |
| AT3G63233 | na                               | This gene encod 3_23363217   | 5.3  | proximal promoter |
| AT4G14615 | na                               | unknown proteir 4_8386650    | 5.3  | intergenic        |
| AT5G41060 | na                               | DHHC-type zinc 5_16438109    | 5.3  | intergenic        |
| AT4G25672 | CONSERVED PEPTIDE UPSTREAM OPE   | Upstream open 4_13087157     | 5.29 | promoter          |
| AT1G63900 | DIAP1-LIKE PROTEIN 1 (DAL1)      | E3 Ubiquitin liq 1_23716253  | 5.29 | promoter          |
| AT4G24660 | HOMEBOX PROTEIN 22 (HB22)        | homeobox prote 4_12723689    | 5.29 | intergenic        |
| AT5G55090 | MITOGEN-ACTIVATED PROTEIN KINASE | member of MEK 5_22359436     | 5.29 | proximal promoter |
| AT4G01680 | MYB DOMAIN PROTEIN 55 (MYB55)    | Encodes a puta 4_719659      | 5.29 | proximal promoter |
| AT2G41830 | na                               | Uncharacterize 2_17457717    | 5.29 | proximal promoter |
| AT2G41835 | na                               | zinc finger (C2) 2_17457717  | 5.29 | downstream        |
| AT4G25670 | na                               | unknown proteir 4_13087157   | 5.29 | promoter          |
| AT4G25680 | na                               | PPPDE putative 4_13087157    | 5.29 | proximal promoter |
| AT1G67720 | na                               | Leucine-rich rep 1_25386396  | 5.29 | five_prime_UTR    |
| AT1G10747 | na                               | Encodes a Mate 1_3575199     | 5.29 | intergenic        |
| AT1G10750 | na                               | Protein of Unkn 1_3575199    | 5.29 | exon              |
| AT1G63880 | na                               | Encodes a TIR- 1_23716253    | 5.29 | promoter          |
| AT1G76230 | na                               | unknown proteir 1_28600690   | 5.29 | promoter          |
| AT2G21780 | na                               | unknown proteir 2_9290747    | 5.29 | promoter          |
| AT1G28260 | na                               | Telomerase act 1_9880607     | 5.29 | proximal promoter |
| AT2G05810 | na                               | ARM repeat sup 2_2217143     | 5.29 | five_prime_UTR    |
| AT2G05812 | na                               | Potential natura 2_2217143   | 5.29 | five_prime_UTR    |
| AT4G24652 | na                               | Pseudogene of 4_12723689     | 5.29 | proximal promoter |
| AT5G64180 | na                               | unknown proteir 5_25676959   | 5.29 | promoter          |
| AT4G00710 | BR-SIGNALING KINASE 3 (BSK3)     | Encodes BR-sic 4_289798      | 5.28 | promoter          |
| AT1G28330 | DORMANCY-ASSOCIATED PROTEIN-LI   | dormancy-asso 1_9936185      | 5.28 | proximal promoter |
| AT3G22990 | LEAF AND FLOWER RELATED (LFR)    | Armadillo-repea 3_8167420    | 5.28 | intergenic        |
| AT3G01202 | na                               | Potential natura 3_71528     | 5.28 | downstream        |
| AT3G01210 | na                               | RNA-binding (R 3_71528       | 5.28 | promoter          |
| AT1G25422 | na                               | unknown proteir 1_8918470    | 5.28 | promoter          |
| AT1G35614 | na                               | unknown proteir 1_13147708   | 5.28 | proximal promoter |
| AT1G80831 | na                               | unknown proteir 1_30376388   | 5.28 | exon              |
| AT1G25420 | na                               | Regulator of Vp 1_8918470    | 5.28 | intergenic        |
| AT3G23690 | na                               | basic helix-loop 3_8531205   | 5.28 | promoter          |
| AT3G23700 | na                               | Nucleic acid-bin 3_8531205   | 5.28 | downstream        |
| AT3G01200 | PPDK REGULATORY PROTEIN 2 (RP2)  | Encodes a PPD 3_71528        | 5.28 | promoter          |
| AT3G05020 | ACYL CARRIER PROTEIN 1 (ACP1)    | encodes an acy 3_1393030     | 5.27 | promoter          |
| AT3G15580 | AUTOPHAGY 8H (APG8H)             | Encodes APG8, 3_5275221      | 5.27 | promoter          |
| AT1G02800 | CELLULOSE 2 (CEL2)               | Encodes a prote 1_616822     | 5.27 | proximal promoter |
| AT1G10690 | na                               | unknown proteir 1_3548067    | 5.27 | intergenic        |
| AT3G15585 | na                               | pre-tRNA; tRNA 3_5275221     | 5.27 | intron            |
| AT2G36854 | na                               | unknown proteir 2_15470090   | 5.27 | downstream        |
| AT2G36860 | na                               | pre-tRNA; tRNA 2_15470090    | 5.27 | downstream        |
| AT5G06700 | na                               | Encodes a merr 5_2063459     | 5.27 | promoter          |
| AT5G63380 | na                               | Encodes a pero 5_25387321    | 5.27 | downstream        |
| AT5G56975 | na                               | pre-tRNA; tRNA 5_23054530    | 5.27 | intergenic        |
| AT5G63370 | na                               | Protein kinase s 5_25387321  | 5.27 | promoter          |
| AT2G27810 | NUCLEOBASE-ASCORBATE TRANSPOR    | nucleobase-asc 2_11856677    | 5.27 | intergenic        |
| AT2G27820 | PREPHENATE DEHYDRATASE 1 (PD1)   | Encodes a plast 2_11856677   | 5.27 | promoter          |
| AT3G05030 | SODIUM HYDROGEN EXCHANGER 2 (N   | Encodes a vacc 3_1393030     | 5.27 | intergenic        |
| AT4G15910 | DROUGHT-INDUCED 21 (DI21)        | encodes a gene 4_9029170     | 5.26 | exon              |
| AT1G02205 | ECERIFERUM 1 (CER1)              | Expression of th 1_418595    | 5.26 | promoter          |
| AT5G10140 | FLOWERING LOCUS C (FLC)          | MADS-box prot 5_3173359      | 5.26 | downstream        |
| AT1G17550 | HOMOLOGY TO ABI2 (HAB2)          | Protein Phosph: 1_6034134    | 5.26 | promoter          |
| AT4G18530 | na                               | Protein of unkn 4_10217328   | 5.26 | promoter          |
| AT4G18520 | na                               | Pentatricopeptic 4_10217328  | 5.26 | promoter          |
| AT4G24350 | na                               | Phosphorylase : 4_12609549   | 5.26 | five_prime_UTR    |
| AT1G79620 | na                               | Leucine-rich rep 1_29957390  | 5.26 | downstream        |
| AT2G28625 | na                               | unknown proteir 2_12273769   | 5.26 | intergenic        |
| AT1G02190 | na                               | Fatty acid hydr 1_418595     | 5.26 | intergenic        |
| AT1G22403 | na                               | other RNA 1_7909844          | 5.26 | promoter          |
| AT4G35025 | na                               | This gene encod 4_16675525   | 5.26 | downstream        |
| AT4G35030 | na                               | Protein kinase s 4_16675525  | 5.26 | promoter          |
| AT5G64320 | na                               | Pentatricopeptic 5_25725725  | 5.26 | promoter          |
| AT5G10130 | na                               | Pollen Ole e 1 a 5_3173359   | 5.26 | proximal promoter |
| AT1G79610 | NA+/H+ ANTIPORTER 6 (NHX6)       | Encodes an enc 1_29957390    | 5.26 | promoter          |
| AT5G64330 | NON-PHOTOTROPIC HYPOCOTYL 3 (N   | Involved in blue 5_25725725  | 5.26 | proximal promoter |
| AT4G35020 | RAC-LIKE 3 (RAC3)                | A member of R( 4_16675525    | 5.26 | intergenic        |
| AT2G23320 | WRKY DNA-BINDING PROTEIN 15 (WRK | Encodes WRKY) 2_9922133      | 5.26 | proximal promoter |
| AT3G09520 | EXOCYST SUBUNIT EXO70 FAMILY PRC | A member of E) 3_2923570     | 5.25 | promoter          |
| AT1G66880 | na                               | Protein kinase s 1_24955637  | 5.25 | downstream        |
| AT1G66890 | na                               | FUNCTIONS IN 1_24955637      | 5.25 | proximal promoter |
| AT2G01220 | na                               | Nucleotidyl tra 2_126772     | 5.25 | intergenic        |
| AT2G01240 | na                               | Reticulon family 2_126772    | 5.25 | intergenic        |
| AT4G09630 | na                               | Protein of unkn 4_6083587    | 5.25 | promoter          |
| AT1G06560 | na                               | NOL1/NOP2/su 1_2007373       | 5.25 | promoter          |
| AT1G19230 | na                               | Riboflavin synth 1_6641145   | 5.25 | intergenic        |
| AT3G29240 | na                               | Protein of unkn 3_11191482   | 5.25 | promoter          |
| AT5G59960 | na                               | unknown proteir 5_24145984   | 5.25 | proximal promoter |
| AT5G59970 | na                               | Histone superfa 5_24145984   | 5.25 | downstream        |
| AT4G13350 | NSP (NUCLEAR SHUTTLE PROTEIN)-IN | Encodes a GTP 4_7773694      | 5.25 | intron            |
| AT2G01140 | PIGMENT DEFECTIVE 345 (PDE345)   | Aldolase super: 2_97887      | 5.25 | proximal promoter |
| AT4G28720 | YUCCA 8 (YUC8)                   | Auxin biosynthe 4_14195893   | 5.25 | intergenic        |
| AT1G79340 | METACASPASE 4 (MC4)              | Encodes MCP2 1_29842584      | 5.24 | promoter          |

|           |                                        |                   |               |      |                   |
|-----------|----------------------------------------|-------------------|---------------|------|-------------------|
| AT1G64660 | METHIONINE GAMMA-LYASE (MGL)           | Encodes a func    | 1_24028579    | 5.24 | promoter          |
| AT3G27700 | na                                     | zinc finger (CC   | 3_10255845    | 5.24 | intergenic        |
| AT5G57710 | na                                     | Double Clip-N m   | 5_23383344    | 5.24 | proximal promoter |
| AT5G10040 | na                                     | unknown protei    | 5_3140646     | 5.24 | intergenic        |
| AT1G11050 | na                                     | Protein kinase s  | 1_3681725     | 5.24 | promoter          |
| AT1G17147 | na                                     | VQ motif-contai   | 1_5864781     | 5.24 | proximal promoter |
| AT1G66100 | na                                     | Predicted to enc  | 1_24606654    | 5.24 | promoter          |
| AT2G04080 | na                                     | MATE efflux fan   | 2_1359649     | 5.24 | promoter          |
| AT2G20920 | na                                     | Protein of unkn   | 2_8998491     | 5.24 | promoter          |
| AT3G06770 | na                                     | Pectin lyase-like | 3_2138290     | 5.24 | proximal promoter |
| AT4G17765 | na                                     | pre-tRNA; tRNA    | 4_9873644     | 5.24 | promoter          |
| AT4G36550 | na                                     | ARM repeat sur    | 4_17249812    | 5.24 | proximal promoter |
| AT5G25820 | na                                     | Exostosin family  | 5_9000983     | 5.24 | proximal promoter |
| AT4G35580 | NAC TRANSCRIPTION FACTOR-LIKE 9        | ( Encodes a calr  | 4_16890982    | 5.24 | promoter          |
| AT1G12110 | NITRATE TRANSPORTER 1.1 (NRT1.1)       | Encodes NRT1.1    | _1_4105102    | 5.24 | promoter          |
| AT3G27690 | PHOTOSYSTEM II LIGHT HARVESTING I      | Encodes Lhcb2 3_  | 10255845      | 5.24 | promoter          |
| AT5G10030 | TGACG MOTIF-BINDING FACTOR 4 (TG       | Encodes a merr    | 5_3140646     | 5.24 | intron            |
| AT5G64530 | XYLEM NAC DOMAIN 1 (XND1)              | xyLEM NAC dorr    | 5_25792654    | 5.24 | proximal promoter |
| AT1G48410 | ARGONAUTE 1 (AGO1)                     | Encodes an RN     | 1_17895038    | 5.23 | proximal promoter |
| AT1G56030 | na                                     | RING/U-box su     | 1_20956706    | 5.23 | intergenic        |
| AT1G06980 | na                                     | unknown protei    | 1_2141985     | 5.23 | intergenic        |
| AT1G16630 | na                                     | unknown protei    | 1_5685367     | 5.23 | proximal promoter |
| AT1G16635 | na                                     | na                | 1_5685367     | 5.23 | downstream        |
| AT1G16640 | na                                     | AP2/B3-like trar  | 1_5685367     | 5.23 | proximal promoter |
| AT1G65010 | na                                     | Putative role in  | 1_24149162    | 5.23 | promoter          |
| AT3G49720 | na                                     | unknown protei    | 3_18442211    | 5.23 | promoter          |
| AT3G49725 | na                                     | GTP-binding prc   | 3_18442211    | 5.23 | downstream        |
| AT2G38060 | PHOSPHATE TRANSPORTER 4;2 (PHT4        | Encodes an ino    | 2_15925875    | 5.23 | promoter          |
| AT3G16500 | PHYTOCHROME-ASSOCIATED PROTEIN         | phytochrome-as    | 3_5615815     | 5.23 | proximal promoter |
| AT5G53280 | PLASTID DIVISION1 (PDV1)               | An integral oute  | 5_21611332    | 5.23 | intergenic        |
| AT3G62720 | XYLOSYLTRANSFERASE 1 (XT1)             | Encodes a prot    | 3_23200961    | 5.23 | promoter          |
| AT5G02290 | (NAK)                                  | Encodes a canc    | 5_472751      | 5.22 | intron            |
| AT5G64740 | CELLULOSE SYNTHASE 6 (CESA6)           | Encodes a cellu   | 5_25881122    | 5.22 | five_prime_UTR    |
| AT3G50830 | COLD-REGULATED 413-PLASMA MEMB         | cold acclimation  | 3_18895583    | 5.22 | promoter          |
| AT1G52760 | LYSOPHOSPHOLIPASE 2 (LysoPL2)          | Encodes a lysol   | 1_19650532    | 5.22 | proximal promoter |
| AT4G16150 | na                                     | calmodulin bind   | 4_9147554     | 5.22 | proximal promoter |
| AT1G32670 | na                                     | unknown protei    | 1_11816495    | 5.22 | intergenic        |
| AT1G52610 | na                                     | transposable elk  | 1_19600589    | 5.22 | proximal promoter |
| AT1G52615 | na                                     | unknown gene      | 1_19600589    | 5.22 | exon              |
| AT5G66770 | na                                     | GRAS family tre   | 5_26659607    | 5.22 | proximal promoter |
| AT2G23430 | (ICK1)                                 | Encodes a cycli   | 2_9976150     | 5.21 | intergenic        |
| AT2G37478 | CONSERVED PEPTIDE UPSTREAM OPE         | Upstream open     | 2_15737650    | 5.21 | promoter          |
| AT3G07060 | EMBRYO DEFECTIVE 1974 (emb1974)        | embryo defectiv   | 3_2232454     | 5.21 | promoter          |
| AT4G31820 | ENHANCER OF PINOID (ENP)               | A member of th    | 4_15397306    | 5.21 | proximal promoter |
| AT1G72020 | na                                     | unknown protei    | 1_27110579    | 5.21 | promoter          |
| AT2G13660 | na                                     | unknown protei    | 2_5691992     | 5.21 | downstream        |
| AT2G13665 | na                                     | Potential natura  | 2_5691992     | 5.21 | promoter          |
| AT2G37470 | na                                     | Histone superfa   | 2_15737650    | 5.21 | intergenic        |
| AT2G37480 | na                                     | unknown protei    | 2_15737650    | 5.21 | promoter          |
| AT3G07055 | na                                     | pre-tRNA; tRNA    | 3_2232454     | 5.21 | downstream        |
| AT2G42040 | na                                     | CONTAINS Inte     | 2_17542259    | 5.21 | proximal promoter |
| AT4G20880 | na                                     | ethylene-respor   | 4_11179128    | 5.21 | three_prime_UTR   |
| AT5G35370 | na                                     | S-locus lectin    | pr 5_13591406 | 5.21 | promoter          |
| AT5G62200 | na                                     | Embryo-specific   | 5_24985823    | 5.21 | promoter          |
| AT3G07050 | NUCLEOSTEMIN-LIKE 1 (NSN1)             | Arabidopsis NS    | 3_2232454     | 5.21 | promoter          |
| AT4G38420 | SKU5 SIMILAR 9 (sks9)                  | SKU5 similar 9    | 4_17982052    | 5.21 | proximal promoter |
| AT4G13520 | SMALL ACIDIC PROTEIN 1 (SMAP1)         | Encodes a smal    | 4_7862503     | 5.21 | proximal promoter |
| AT3G59280 | THAXTOMIN A RESISTANT 1 (TXR1)         | mutant exhibite   | 3_21910728    | 5.21 | promoter          |
| AT2G24570 | WRKY DNA-BINDING PROTEIN 17 (WRK       | member of WR1     | 2_10437838    | 5.21 | exon              |
| AT1G21410 | (SKP2A)                                | AtSKP2;1 is a h   | 1_7496996     | 5.2  | promoter          |
| AT5G54800 | GLUCOSE 6-PHOSPHATE/PHOSPHATE          | Encodes glucos    | 5_22258601    | 5.2  | proximal promoter |
| AT4G15250 | na                                     | B-box type zinc   | 4_8711629     | 5.2  | proximal promoter |
| AT1G23030 | na                                     | ARM repeat sur    | 1_8159233     | 5.2  | downstream        |
| AT1G21400 | na                                     | Thiamin diphos    | 1_7496996     | 5.2  | intergenic        |
| AT3G02270 | na                                     | Trimeric LpxA-li  | 3_451241      | 5.2  | promoter          |
| AT2G27360 | na                                     | GDSL-like Lipas   | 2_11706027    | 5.2  | promoter          |
| AT2G42425 | na                                     | Unknown gene      | 2_17662711    | 5.2  | promoter          |
| AT3G01516 | na                                     | unknown protei    | 3_208315      | 5.2  | downstream        |
| AT3G17250 | na                                     | Protein phosph    | 3_5894944     | 5.2  | promoter          |
| AT3G01520 | na                                     | Adenine nucleot   | 3_208315      | 5.2  | promoter          |
| AT3G04420 | NAC DOMAIN CONTAINING PROTEIN 4E       | NAC domain co     | 3_1171477     | 5.2  | proximal promoter |
| AT5G67440 | NAKED PINS IN YUC MUTANTS 3 (NPY3      | A member of th    | 5_26916318    | 5.2  | promoter          |
| AT4G12420 | (SKU5)                                 | Encodes a prot    | 4_7349346     | 5.19 | intron            |
| AT1G35580 | CYTOSOLIC INVERTASE 1 (CINV1)          | CINV1 / A/N-Inv   | 1_13126633    | 5.19 | proximal promoter |
| AT5G16760 | INOSITOL (1,3,4) P3 5/6-KINASE 1 (ITPK | Encodes a inosi   | 5_5509479     | 5.19 | promoter          |
| AT1G75830 | LOW-MOLECULAR-WEIGHT CYSTEINE-         | Predicted to enc  | 1_28470161    | 5.19 | proximal promoter |
| AT2G42190 | na                                     | unknown protei    | 2_17582715    | 5.19 | promoter          |
| AT1G18610 | na                                     | Galactose oxid    | 1_6409522     | 5.19 | downstream        |
| AT1G29430 | na                                     | SAUR-like auxir   | 1_10303587    | 5.19 | promoter          |
| AT2G28620 | na                                     | P-loop containir  | 2_12270846    | 5.19 | proximal promoter |
| AT4G22190 | na                                     | unknown protei    | 4_11743173    | 5.19 | exon              |
| AT5G49510 | PREFOLDIN 3 (PFD3)                     | prefoldin 3 (P    | 5_20084339    | 5.19 | intergenic        |
| AT1G06040 | SALT TOLERANCE (STO)                   | Encodes salt tol  | 1_1829927     | 5.19 | promoter          |
| AT1G29440 | SMALL AUXIN UP RNA 63 (SAUR63)         | SAUR-like auxir   | 1_10303587    | 5.19 | intergenic        |
| AT1G18620 | TON1 RECRUITING MOTIF 3 (TRM3)         | unknown protei    | 1_6409522     | 5.19 | promoter          |
| AT4G14660 | (NRPE7)                                | Non-catalytic su  | 4_8405965     | 5.18 | intergenic        |
| AT1G04220 | 3-KETOACYL-COA SYNTHASE 2 (KCS2)       | Encodes KCS2      | 1_1122429     | 5.18 | exon              |
| AT3G55950 | CRINKLY4 RELATED 3 (CCR3)              | CRINKLY4 relat    | 3_20757885    | 5.18 | proximal promoter |
| AT4G11350 | na                                     | Protein of unkn   | 4_6903310     | 5.18 | intron            |
| AT2G44420 | na                                     | protein N-termir  | 2_18335099    | 5.18 | intergenic        |
| AT2G44430 | na                                     | DNA-binding br    | 2_18335099    | 5.18 | intron            |
| AT4G05070 | na                                     | Wound-respons     | 4_2594259     | 5.18 | promoter          |
| AT4G05071 | na                                     | This gene encod   | 4_2594259     | 5.18 | exon              |
| AT1G04140 | na                                     | Transducin fami   | 1_1081030     | 5.18 | promoter          |

|           |                                     |                              |      |                   |
|-----------|-------------------------------------|------------------------------|------|-------------------|
| AT1G04150 | na                                  | C2 calcium/lipid 1_1081030   | 5.18 | downstream        |
| AT1G27930 | na                                  | Function unknow 1_9731054    | 5.18 | downstream        |
| AT1G45010 | na                                  | TRAM, LAG1 ar 1_17015528     | 5.18 | promoter          |
| AT1G72240 | na                                  | unknown protei 1_27191345    | 5.18 | intergenic        |
| AT2G37430 | na                                  | C2H2 and C2H2 2_15706108     | 5.18 | promoter          |
| AT1G26930 | na                                  | Galactose oxid 1_9338447     | 5.18 | proximal promoter |
| AT5G20020 | RAS-RELATED GTP-BINDING NUCLEAR     | A member of R/ 5_6760213     | 5.18 | proximal promoter |
| AT5G20010 | RAS-RELATED NUCLEAR PROTEIN-1 (R    | A member of R/ 5_6760213     | 5.18 | promoter          |
| AT1G79590 | SYNTAXIN OF PLANTS 52 (SYP52)       | Encodes one of 1_29945309    | 5.18 | proximal promoter |
| AT4G37790 | (HAT22)                             | Encodes homec 4_17764480     | 5.17 | intergenic        |
| AT1G04250 | AUXIN RESISTANT 3 (AXR3)            | Transcription re 1_1133876   | 5.17 | proximal promoter |
| AT1G67730 | BETA-KETOACYL REDUCTASE 1 (KCR1     | Encodes one of 1_25391512    | 5.17 | five_prime_UTR    |
| AT2G19980 | na                                  | CAP (Cysteine- 2_8629373     | 5.17 | proximal promoter |
| AT5G58160 | na                                  | actin binding; F1 5_23533525 | 5.17 | promoter          |
| AT3G13370 | na                                  | unknown protei 3_4344140     | 5.17 | intergenic        |
| AT1G28140 | na                                  | unknown protei 1_9832600     | 5.17 | downstream        |
| AT1G66090 | na                                  | Disease resist 1_24602085    | 5.17 | promoter          |
| AT3G06435 | na                                  | Expressed prot 3_1970898     | 5.17 | promoter          |
| AT3G55450 | PBS1-LIKE 1 (PBL1)                  | PBS1-like 1 (PE 3_20557547   | 5.17 | promoter          |
| AT4G29220 | PHOSPHOFRUCTOKINASE 1 (PFK1)        | phosphofructoki 4_14406534   | 5.17 | five_prime_UTR    |
| AT5G58140 | PHOTOTROPIN 2 (PHOT2)               | Membrane-bour 5_23533525     | 5.17 | intergenic        |
| AT3G55440 | TRIOSEPHOSPHATE ISOMERASE (TPI)     | Encodes triosep 3_20557547   | 5.17 | intergenic        |
| AT2G40140 | (CZF1)                              | CZF1; CONTAll 2_16770491     | 5.16 | proximal promoter |
| AT5G67480 | BTB AND TAZ DOMAIN PROTEIN 4 (BT4   | BTB and TAZ di 5_26930704    | 5.16 | intergenic        |
| AT1G16858 | CONSERVED PEPTIDE UPSTREAM OPE      | Upstream open 1_5766499      | 5.16 | proximal promoter |
| AT3G55830 | ECTOPICALLY PARTING CELLS (EPC1)    | A member of the 3_20714919   | 5.16 | promoter          |
| AT1G15190 | na                                  | Fasciclin-like ar 1_5228111  | 5.16 | three_prime_UTR   |
| AT1G67510 | na                                  | Leucine-rich re; 1_25300941  | 5.16 | proximal promoter |
| AT3G20830 | na                                  | AGC (cAMP-de 3_7285125       | 5.16 | exon              |
| AT3G55820 | na                                  | Fasciclin-like ar 3_20714919 | 5.16 | downstream        |
| AT5G04386 | na                                  | This gene encod 5_1238149    | 5.16 | exon              |
| AT5G47790 | na                                  | SMAD/FHA don 5_19353308      | 5.16 | three_prime_UTR   |
| AT5G47800 | na                                  | Phototropic-res; 5_19353308  | 5.16 | promoter          |
| AT5G64760 | REGULATORY PARTICLE NON-ATPASE      | Encodes one of 5_25896710    | 5.16 | promoter          |
| AT1G44170 | ALDEHYDE DEHYDROGENASE 3H1 (AL      | Encodes a prote 1_16801086   | 5.15 | proximal promoter |
| AT5G59040 | COPPER TRANSPORTER 3 (COPT3)        | encodes a mem 5_23838777     | 5.15 | intergenic        |
| AT2G45200 | GOLGI SNARE 12 (GOS12)              | Encodes a merr 2_18637255    | 5.15 | intergenic        |
| AT5G15150 | HOMEBOX 3 (HB-3)                    | homeobox-cont 5_4918147      | 5.15 | proximal promoter |
| AT1G17230 | na                                  | Leucine-rich rec 1_5890841   | 5.15 | promoter          |
| AT5G59050 | na                                  | unknown protei 5_23838777    | 5.15 | intergenic        |
| AT2G05940 | RPM1-INDUCED PROTEIN KINASE (RIP1   | Encodes a rece 2_2289690     | 5.15 | promoter          |
| AT4G25360 | TRICHOME BIREFRINGENCE-LIKE 18 (T   | Encodes a merr 4_12969494    | 5.15 | promoter          |
| AT1G04180 | YUCCA 9 (YUC9)                      | YUCCA 9 (YUC 1_1103339       | 5.15 | proximal promoter |
| AT4G12720 | (NUDT7)                             | Encodes a prot 4_7489946     | 5.14 | three_prime_UTR   |
| AT1G49160 | (WNK7)                              | Encodes a merr 1_18182799    | 5.14 | promoter          |
| AT1G68310 | AS1/2 ENHANCER7 (AE7)               | Encodes a prote 1_25599399   | 5.14 | promoter          |
| AT3G11700 | FASCICLIN-LIKE ARABINOGLACTAN P     | FASCICLIN-like 3_3701713     | 5.14 | downstream        |
| AT5G66700 | HOMEBOX 53 (HB53)                   | Encodes a hom 5_26631300     | 5.14 | intergenic        |
| AT3G11710 | LYSYL-TRNA SYNTHETASE 1 (ATKRS-1    | lysyl-tRNA synt 3_3701713    | 5.14 | intergenic        |
| AT5G24710 | na                                  | Transducin/WD 5_8468421      | 5.14 | promoter          |
| AT5G24735 | na                                  | Unknown gene 5_8468421       | 5.14 | exon              |
| AT1G68300 | na                                  | Adenine nucleoi 1_25599399   | 5.14 | promoter          |
| AT1G75090 | na                                  | DNA glycosylas 1_28188642    | 5.14 | intron            |
| AT2G36340 | na                                  | DNA-binding str 2_15237813   | 5.14 | downstream        |
| AT2G36350 | na                                  | Protein kinase s 2_15237813  | 5.14 | promoter          |
| AT1G30350 | na                                  | Pectin lyase-like 1_10707821 | 5.14 | intergenic        |
| AT2G46735 | na                                  | unknown protei 2_19204860    | 5.14 | exon              |
| AT5G13600 | na                                  | Phototropic-res; 5_4380005   | 5.14 | promoter          |
| AT5G49555 | na                                  | FAD/NAD(P)-bi 5_20110814     | 5.14 | promoter          |
| AT5G49560 | na                                  | Putative methyl 5_20110814   | 5.14 | downstream        |
| AT5G51110 | na                                  | Transcriptional 5_20779569   | 5.14 | promoter          |
| AT5G51120 | POLYADENYLATE-BINDING PROTEIN 1     | Encodes a hom 5_20779569     | 5.14 | intron            |
| AT3G05650 | RECEPTOR LIKE PROTEIN 32 (RLP32)    | receptor like prc 3_1649060  | 5.14 | promoter          |
| AT3G05660 | RECEPTOR LIKE PROTEIN 33 (RLP33)    | receptor like prc 3_1649060  | 5.14 | three_prime_UTR   |
| AT1G01650 | SIGNAL PEPTIDE PEPTIDASE-LIKE 4 (SI | SIGNAL PEPTII 1_239830       | 5.14 | proximal promoter |
| AT5G43260 | na                                  | chaperone prot 5_17358246    | 5.13 | promoter          |
| AT5G55520 | na                                  | CONTAINS Inte 5_22491392     | 5.13 | promoter          |
| AT1G73760 | na                                  | RING/U-box suj 1_27741427    | 5.13 | promoter          |
| AT3G14415 | na                                  | Aldolase-type T 3_4818206    | 5.13 | promoter          |
| AT5G62950 | na                                  | RNA polymeras 5_25266276     | 5.13 | proximal promoter |
| AT5G03705 | na                                  | pre-tRNA; tRNA 5_970890      | 5.13 | promoter          |
| AT5G11670 | NADP-MALIC ENZYME 2 (NADP-ME2)      | The malic enzyr 5_3754245    | 5.13 | promoter          |
| AT3G48530 | SNF1-RELATED PROTEIN KINASE REGI    | SNF1-related pi 3_17987288   | 5.13 | promoter          |
| AT4G32400 | SODIUM HYPERSENSITIVE 1 (SHS1)      | Encodes a plas 4_15638382    | 5.13 | promoter          |
| AT3G02350 | GALACTURONOSYLTRANSFERASE 9 (C      | Encodes a prote 3_478841     | 5.12 | promoter          |
| AT4G32980 | HOMEBOX GENE 1 (ATH1)               | Encodes transc 4_15918238    | 5.12 | promoter          |
| AT3G16360 | HPT PHOSPHOTRANSMITTER 4 (AHP4)     | Encodes AHP4, 3_5555474      | 5.12 | intron            |
| AT1G20830 | MULTIPLE CHLOROPLAST DIVISION SII   | Encodes MCD1 1_7242757       | 5.12 | promoter          |
| AT4G35589 | na                                  | unknown protei 4_16892868    | 5.12 | exon              |
| AT1G16740 | na                                  | Ribosomal prote 1_5727556    | 5.12 | promoter          |
| AT5G21105 | na                                  | Plant L-ascorba 5_7174826    | 5.12 | intron            |
| AT5G66755 | na                                  | pre-tRNA; tRNA 5_26653501    | 5.12 | promoter          |
| AT1G20820 | na                                  | pre-tRNA; tRNA 1_7242757     | 5.12 | downstream        |
| AT1G78460 | na                                  | SOUL heme-bir 1_29520006     | 5.12 | proximal promoter |
| AT1G78450 | na                                  | SOUL heme-bir 1_29520006     | 5.12 | proximal promoter |
| AT3G52500 | na                                  | Eukaryotic aspa 3_19467535   | 5.12 | promoter          |
| AT5G01450 | na                                  | RING/U-box suj 5_186572      | 5.12 | promoter          |
| AT5G01460 | na                                  | LMBR1-like mei 5_186572      | 5.12 | promoter          |
| AT2G28890 | POLTERGEIST LIKE 4 (PLL4)           | Encodes a prote 2_12409499   | 5.12 | proximal promoter |
| AT2G28890 | POLTERGEIST LIKE 4 (PLL4)           | Encodes a prote 2_12408419   | 5.12 | promoter          |
| AT3G02230 | REVERSIBLY GLYCOSYLATED POLYPE      | RGP1 is a UDP 3_416181       | 5.12 | intron            |
| AT1G68825 | ROTUNDIFOLIA LIKE 15 (RTFL15)       | ROTUNDIFOLI 1_25870384       | 5.12 | intron            |
| AT4G35590 | RWP-RK DOMAIN-CONTAINING 5 (RKD:    | RWP-RK domai 4_16892868      | 5.12 | promoter          |
| AT5G07120 | SORTING NEXIN 2B (SNX2b)            | Encodes sortin; 5_2209592    | 5.12 | promoter          |

|           |                                    |                   |             |      |                   |
|-----------|------------------------------------|-------------------|-------------|------|-------------------|
| AT3G11900 | AROMATIC AND NEUTRAL TRANSPORT     | encodes an ami    | 3_3760572   | 5.11 | downstream        |
| AT3G22968 | CONSERVED PEPTIDE UPSTREAM OPE     | Upstream open     | 3_8157737   | 5.11 | intergenic        |
| AT1G08930 | EARLY RESPONSE TO DEHYDRATION      | encodes a puta    | 1_2872661   | 5.11 | proximal promoter |
| AT5G24920 | GLUTAMINE DUMPER 5 (GDU5)          | Encodes a merr    | 5_8584439   | 5.11 | promoter          |
| AT5G67060 | HECATE 1 (HEC1)                    | HECATE 1 (HE)     | 5_26765456  | 5.11 | proximal promoter |
| AT1G74490 | na                                 | Protein kinase s  | 1_27996786  | 5.11 | promoter          |
| AT3G05700 | na                                 | Drought-respon    | 3_1684765   | 5.11 | promoter          |
| AT3G59455 | na                                 | Encodes a Prot    | 3_21977540  | 5.11 | downstream        |
| AT3G59460 | na                                 | BEST Arabidop     | 3_21977540  | 5.11 | intron            |
| AT4G30940 | na                                 | BTB/POZ doma      | 4_15054838  | 5.11 | promoter          |
| AT2G33830 | na                                 | Dormancy/auxir    | 2_14310871  | 5.11 | proximal promoter |
| AT3G19500 | na                                 | basic helix-loop  | 3_6761521   | 5.11 | proximal promoter |
| AT3G60750 | na                                 | Transketolase;    | 1_22453569  | 5.11 | promoter          |
| AT4G21170 | na                                 | Tetratricopeptid  | 4_11288755  | 5.11 | promoter          |
| AT4G27900 | na                                 | CCT motif famil   | 4_13889244  | 5.11 | proximal promoter |
| AT5G06210 | na                                 | RNA binding (R    | 5_1879791   | 5.11 | downstream        |
| AT5G06220 | na                                 | LETM1-like prot   | 5_1879791   | 5.11 | promoter          |
| AT5G41800 | na                                 | Transmembran      | 5_16733736  | 5.11 | promoter          |
| AT1G79410 | ORGANIC CATION/CARNITINE TRANSP    | organic cation/c  | 1_29869880  | 5.11 | promoter          |
| AT1G23820 | SPERMIDINE SYNTHASE 1 (SPDS1)      | Spermidine syn    | 1_8420130   | 5.11 | promoter          |
| AT3G05710 | SYNTAXIN OF PLANTS 43 (SYP43)      | Encodes a merr    | 3_1684765   | 5.11 | promoter          |
| AT3G11910 | UBIQUITIN-SPECIFIC PROTEASE 13 (UE | ubiquitin-specifi | 3_3760572   | 5.11 | intergenic        |
| AT4G30935 | WRKY DNA-BINDING PROTEIN 32 (WRK   | member of WRK     | 4_15054838  | 5.11 | proximal promoter |
| AT4G30270 | XYLOGLUCAN ENDOTRANSGLUCOSYL       | encodes a prote   | 4_14822198  | 5.11 | proximal promoter |
| AT4G37800 | XYLOGLUCAN ENDOTRANSGLUCOSYL       | xyloglucan endc   | 4_17774620  | 5.11 | intergenic        |
| AT2G06530 | (VPS2.1)                           | VPS2.1; CONT      | 2_2588475   | 5.1  | downstream        |
| AT5G18270 | ARABIDOPSIS NAC DOMAIN CONTAINI    | Arabidopsis NA    | 5_6046198   | 5.1  | intergenic        |
| AT3G13970 | AUTOPHAGY 12 B (APG12B)            | AUTOPHAGY 1       | 3_4613418   | 5.1  | downstream        |
| AT3G22840 | EARLY LIGHT-INDUCIBLE PROTEIN (EL  | Encodes an ear    | 3_8083471   | 5.1  | intergenic        |
| AT1G06780 | GALACTURONOSYLTRANSFERASE 6 (G     | Encodes a prot    | 1_2083141   | 5.1  | promoter          |
| AT1G26945 | KIDARI (KDR)                       | Encodes a basi    | 1_9350298   | 5.1  | proximal promoter |
| AT2G13460 | na                                 | transposable elk  | 2_5606522   | 5.1  | proximal promoter |
| AT3G13965 | na                                 | pseudogene, hy    | 3_4613418   | 5.1  | proximal promoter |
| AT5G53540 | na                                 | P-loop containir  | 5_21753021  | 5.1  | proximal promoter |
| AT5G59260 | na                                 | Concanavalin A    | 5_23910701  | 5.1  | proximal promoter |
| AT3G54140 | PEPTIDE TRANSPORTER 1 (PTR1)       | Encodes a di-     | 3_20048737  | 5.1  | promoter          |
| AT2G06520 | PHOTOSYSTEM II SUBUNIT X (PSBX)    | Encodes a prot    | 2_2588475   | 5.1  | promoter          |
| AT2G47470 | UNFERTILIZED EMBRYO SAC 5 (UNE5)   | Encodes a prot    | 2_19481246  | 5.1  | promoter          |
| AT2G26910 | ATP-BINDING CASSETTE G32 (ABCG32   | Encodes a merr    | 2_11480501  | 5.09 | proximal promoter |
| AT3G18290 | BRUTUS (BTS)                       | Encodes BRUT      | 3_6273894   | 5.09 | promoter          |
| AT4G16650 | na                                 | O-fucosyltransf   | 4_9372074   | 5.09 | promoter          |
| AT4G33400 | na                                 | Vacuolar import   | 4_16080698  | 5.09 | promoter          |
| AT1G10560 | PLANT U-BOX 18 (PUB18)             | Encodes a prot    | 1_3484441   | 5.09 | promoter          |
| AT1G58180 | BETA CARBONIC ANHYDRASE 6 (BCA6)   | beta carbonic ai  | 1_21539948  | 5.08 | promoter          |
| AT1G05470 | COTYLEDON VASCULAR PATTERN 2 (C    | Encodes an ino    | 1_1608306   | 5.08 | intron            |
| AT3G24520 | HEAT SHOCK TRANSCRIPTION FACTO     | member of Heat    | 3_8943345   | 5.08 | intergenic        |
| AT3G60390 | HOMEBOX-LEUCINE ZIPPER PROTEIN     | Encodes homec     | 3_22321420  | 5.08 | intron            |
| AT3G27820 | MONODEHYDROASCORBATE REDUCT        | Encodes a pero    | 3_10318427  | 5.08 | intergenic        |
| AT3G24518 | na                                 | Potential natura  | 3_8943345   | 5.08 | proximal promoter |
| AT2G41905 | na                                 | BEST Arabidop     | 2_17495434  | 5.08 | promoter          |
| AT1G63290 | na                                 | Aldolase-type T   | 1_23473922  | 5.08 | promoter          |
| AT1G63295 | na                                 | Remorin family    | 1_23473922  | 5.08 | downstream        |
| AT1G72130 | na                                 | Major facilitator | 1_27137145  | 5.08 | promoter          |
| AT2G18240 | na                                 | Rer1 family prot  | 2_7935068   | 5.08 | promoter          |
| AT2G44770 | na                                 | ELMO/CED-12       | 2_18456791  | 5.08 | proximal promoter |
| AT1G73870 | na                                 | B-box type zinc   | 1_27778336  | 5.08 | proximal promoter |
| AT3G27825 | na                                 | pre-tRNA; tRNA    | 3_10318427  | 5.08 | downstream        |
| AT3G60380 | na                                 | FUNCTIONS IN      | 3_22321420  | 5.08 | proximal promoter |
| AT3G27830 | RIBOSOMAL PROTEIN L12-A (RPL12-A)  | 50S ribosomal r   | 3_10318427  | 5.08 | promoter          |
| AT1G05460 | SILENCING DEFECTIVE (SDE3)         | Encodes a prot    | 1_1608306   | 5.08 | intergenic        |
| AT5G06290 | 2-CYSTEINE PEROXIREDOXIN B (2-Cys  | Encodes a 2-Cy    | 5_1921870   | 5.07 | intergenic        |
| AT5G61440 | ATYPICAL CYS HIS RICH THIOREDOXIN  | Encodes a merr    | 5_24707171  | 5.07 | promoter          |
| AT1G02640 | BETA-XYLOSIDASE 2 (BXL2)           | encodes a prote   | 1_564648    | 5.07 | exon              |
| AT5G22250 | CCR4- ASSOCIATED FACTOR 1B (CAF1   | Encodes one of    | 5_7366638   | 5.07 | five_prime_UTR    |
| AT3G53280 | CYTOCHROME P450 71B5 (CYP71B5)     | cytochrome P4f    | 3_19755644  | 5.07 | promoter          |
| AT1G26770 | EXPANSIN A10 (EXPA10)              | Encodes an exp    | 1_9258582   | 5.07 | proximal promoter |
| AT5G06300 | LONELY GUY 7 (LOG7)                | Putative lysine   | 5_1921870   | 5.07 | three_prime_UTR   |
| AT5G26140 | LONELY GUY 9 (LOG9)                | LONELY GUY        | 5_9132546   | 5.07 | intergenic        |
| AT3G20640 | na                                 | basic helix-loop  | 3_7214071   | 5.07 | proximal promoter |
| AT3G08636 | na                                 | unknown protei    | 3_2622748   | 5.07 | exon              |
| AT3G08640 | na                                 | Protein of unknc  | 3_2622748   | 5.07 | promoter          |
| AT1G31835 | na                                 | unknown protei    | 1_11423843  | 5.07 | promoter          |
| AT1G31840 | na                                 | Tetratricopeptid  | 1_11423843  | 5.07 | promoter          |
| AT2G32179 | na                                 | Potential natura  | 2_13673427  | 5.07 | downstream        |
| AT2G41380 | na                                 | S-adenosyl-L-m    | 2_17249137  | 5.07 | proximal promoter |
| AT1G76980 | na                                 | BEST Arabidop     | 1_28927652  | 5.07 | promoter          |
| AT2G32180 | PLASTID TRANSCRIPTIONALLY ACTIVE   | plastid transcrip | 2_13673427  | 5.07 | promoter          |
| AT3G23805 | RALF-LIKE 24 (RALFL24)             | Member of a div   | 3_8585782   | 5.07 | proximal promoter |
| AT1G16130 | WALL ASSOCIATED KINASE-LIKE 2 (WA  | wall-associated   | 1_5525313   | 5.07 | promoter          |
| AT5G25620 | YUCCA6 (YUC6)                      | YUCCA6 (YUC       | 5_8934934   | 5.07 | downstream        |
| AT5G07220 | BCL-2-ASSOCIATED ATHANOGENE 3 (E   | A member of Ar    | 5_2265964   | 5.06 | exon              |
| AT1G08830 | COPPER/ZINC SUPEROXIDE DISMUTAS    | Encodes a cyto    | 1_2827059   | 5.06 | promoter          |
| AT3G27390 | na                                 | unknown protei    | 3_10132965  | 5.06 | downstream        |
| AT5G41100 | na                                 | FUNCTIONS IN      | 5_16451150  | 5.06 | intergenic        |
| AT5G41110 | na                                 | unknown protei    | 5_16451150  | 5.06 | promoter          |
| AT1G35430 | na                                 | unknown protei    | 1_13031098  | 5.06 | five_prime_UTR    |
| AT3G06410 | na                                 | Zinc finger C-x8  | 3_1951230   | 5.06 | proximal promoter |
| AT2G42690 | na                                 | alpha/beta-Hydr   | 2_17778099  | 5.06 | promoter          |
| AT2G42700 | na                                 | FUNCTIONS IN      | 2_17778099  | 5.06 | promoter          |
| AT5G44050 | na                                 | MATE efflux fan   | 5_17721719  | 5.06 | proximal promoter |
| AT5G54470 | na                                 | B-box type zinc   | 5_222113099 | 5.06 | intergenic        |
| AT5G44040 | na                                 | unknown protei    | 5_17721719  | 5.06 | promoter          |
| AT3G27380 | SUCCINATE DEHYDROGENASE 2-1 (SD    | One of three isc  | 3_10132965  | 5.06 | promoter          |
| AT3G29760 | na                                 | Haloacid dehalc   | 3_11592399  | 5.05 | proximal promoter |

|           |                                     |                               |      |                   |
|-----------|-------------------------------------|-------------------------------|------|-------------------|
| AT2G15440 | na                                  | Protein of unknc 2_6743597    | 5.05 | downstream        |
| AT5G41140 | na                                  | Myosin heavy c 5_16467576     | 5.05 | proximal promoter |
| AT5G45940 | NUDIX HYDROLASE HOMOLOG 11 (NUI     | Encodes a CoA 5_18632080      | 5.05 | proximal promoter |
| AT1G02840 | SERINE/ARGININE-RICH PROTEIN SPLI   | SR34/SR1 is a p 1_626736      | 5.05 | promoter          |
| AT1G76890 | (GT2)                               | encodes a plant 1_28878007    | 5.04 | proximal promoter |
| AT5G66210 | CALCIUM-DEPENDENT PROTEIN KINAS     | member of Calc 5_26459798     | 5.04 | promoter          |
| AT2G03800 | GEK01 (GEK1)                        | encodes a D-an 2_1156726      | 5.04 | five_prime_UTR    |
| AT1G77370 | na                                  | Glutaredoxin far 1_29073781   | 5.04 | promoter          |
| AT5G03668 | na                                  | Potential natura 5_950468     | 5.04 | proximal promoter |
| AT5G46510 | na                                  | Disease resistai 5_18860174   | 5.04 | promoter          |
| AT1G65486 | na                                  | unknown proteir 1_24349221    | 5.04 | promoter          |
| AT5G60800 | na                                  | Heavy metal tra 5_24460445    | 5.04 | intergenic        |
| AT5G66211 | na                                  | This gene encoi 5_26459798    | 5.04 | exon              |
| AT4G00335 | RING-H2 FINGER B1A (RHB1A)          | RING-H2 finger 4_145764       | 5.04 | promoter          |
| AT5G03670 | TON1 RECRUITING MOTIF 28 (TRM28)    | unknown proteir 5_950468      | 5.04 | intergenic        |
| AT5G37770 | TOUCH 2 (TCH2)                      | Encodes a prot 5_14999589     | 5.04 | five_prime_UTR    |
| AT4G19710 | ASPARTATE KINASE-HOMOSERINE DEI     | Encodes a bifur 4_10724828    | 5.03 | promoter          |
| AT1G05570 | CALLOSE SYNTHASE 1 (CAL51)          | Encodes a callo 1_1661109     | 5.03 | proximal promoter |
| AT1G80560 | ISOPROPYLMALATE DEHYDROGENAS1       | The AtIMD2 is c 1_30286894    | 5.03 | proximal promoter |
| AT5G16600 | MYB DOMAIN PROTEIN 43 (MYB43)       | Encodes a puta 5_5436575      | 5.03 | proximal promoter |
| AT1G19650 | na                                  | Sec14p-like phc 1_6799818     | 5.03 | promoter          |
| AT1G19660 | na                                  | Wound-respons 1_6799818       | 5.03 | downstream        |
| AT1G20670 | na                                  | DNA-binding bri 1_7168106     | 5.03 | promoter          |
| AT1G66890 | na                                  | FUNCTIONS IN 1_24957446       | 5.03 | promoter          |
| AT3G61810 | na                                  | Glycosyl hydroli 3_22878655   | 5.03 | downstream        |
| AT1G05575 | na                                  | unknown proteir 1_1661109     | 5.03 | intergenic        |
| AT1G05577 | na                                  | CONTAINS Inte 1_1661109       | 5.03 | intergenic        |
| AT1G21738 | na                                  | unknown proteir 1_7641153     | 5.03 | promoter          |
| AT1G80555 | na                                  | Isocitrate/isopro 1_30286894  | 5.03 | promoter          |
| AT1G21740 | na                                  | Protein of unknc 1_7641153    | 5.03 | promoter          |
| AT3G52500 | na                                  | Eukaryotic aspa 3_19463908    | 5.03 | intergenic        |
| AT4G35720 | na                                  | Arabidopsis pro 4_16927798    | 5.03 | promoter          |
| AT5G24610 | na                                  | unknown proteir 5_8427943     | 5.03 | promoter          |
| AT1G03080 | NETWORKED 1D (NET1D)                | kinase interacti 1_738139     | 5.03 | promoter          |
| AT1G48920 | NUCLEOLIN LIKE 1 (NUC-L1)           | Encodes ATNU 1_18097949       | 5.03 | promoter          |
| AT2G18040 | PEPTIDYLPROLYL CIS/TRANS ISOMER/    | phosphorylation 2_7842049     | 5.03 | promoter          |
| AT5G04940 | SU(VAR)3-9 HOMOLOG 1 (SUVH1)        | Encodes a SU( 5_1457190       | 5.03 | promoter          |
| AT1G12240 | (ATBETAFRUCT4)                      | Encodes a vacu 1_4151276      | 5.02 | proximal promoter |
| AT3G47500 | CYCLING DOF FACTOR 3 (CDF3)         | Dof-type zinc fir 3_17507848  | 5.02 | proximal promoter |
| AT5G25350 | EIN3-BINDING F BOX PROTEIN 2 (EBF2) | Arabidopsis thal 5_8798321    | 5.02 | proximal promoter |
| AT4G25080 | MAGNESIUM-PROTOPORPHYRIN IX ME      | Encodes a prote 4_12876892    | 5.02 | intron            |
| AT1G12230 | na                                  | Aldolase superf: 1_4151276    | 5.02 | downstream        |
| AT1G67920 | na                                  | unknown proteir 1_25472472    | 5.02 | proximal promoter |
| AT1G15120 | na                                  | Ubiquinol-cytocl 1_5202623    | 5.02 | promoter          |
| AT1G67910 | na                                  | unknown proteir 1_25472472    | 5.02 | promoter          |
| AT2G23690 | na                                  | unknown proteir 2_10074567    | 5.02 | intergenic        |
| AT1G27440 | (GUT2)                              | GUT2; FUNCTI 1_9531527        | 5.01 | promoter          |
| AT5G12230 | (MED19A)                            | MED19A; BEST 5_3956208        | 5.01 | promoter          |
| AT3G51840 | ACYL-COA OXIDASE 4 (ACX4)           | Encodes a shor 3_19229181     | 5.01 | promoter          |
| AT1G27450 | ADENINE PHOSPHORIBOSYL TRANSFE      | Adenosine phos 1_9531527      | 5.01 | promoter          |
| AT3G56660 | BASIC REGION/LEUCINE ZIPPER MOTIF   | basic region/leu 3_20988402   | 5.01 | promoter          |
| AT1G78670 | GAMMA-GLUTAMYL HYDROLASE 3 (GG      | gamma-glutamyl 1_29590758     | 5.01 | promoter          |
| AT5G33285 | na                                  | transposable elk 5_12553582   | 5.01 | intergenic        |
| AT5G48655 | na                                  | RING/U-box suj 5_19733104     | 5.01 | promoter          |
| AT5G15810 | na                                  | N2,N2-dimethyl 5_5161585      | 5.01 | downstream        |
| AT5G15815 | na                                  | pre-tRNA; tRNA 5_5161585      | 5.01 | downstream        |
| AT2G18670 | na                                  | RING/U-box suj 2_8094341      | 5.01 | intron            |
| AT2G18680 | na                                  | unknown proteir 2_8094341     | 5.01 | promoter          |
| AT1G66180 | na                                  | The gene encoc 1_24648543     | 5.01 | three_prime_UTR   |
| AT3G06778 | na                                  | Chaperone Dna 3_2142137       | 5.01 | proximal promoter |
| AT5G60670 | na                                  | Ribosomal prote 5_24381788    | 5.01 | promoter          |
| AT3G15730 | PHOSPHOLIPASE D ALPHA 1 (PLDALPH    | Encodes phosp 3_5330276       | 5.01 | promoter          |
| AT5G43090 | PUMILIO 13 (PUM13)                  | Encodes a merr 5_17295340     | 5.01 | proximal promoter |
| AT5G66350 | SHORT INTERNODES (SHI)              | A member of Sh 5_26506584     | 5.01 | promoter          |
| AT5G67180 | TARGET OF EARLY ACTIVATION TAGG1    | target of early a 5_26804735  | 5.01 | promoter          |
| AT1G24120 | ARG1-LIKE 1 (ARL1)                  | encodes a Dna. 1_8533377      | 5    | proximal promoter |
| AT5G01747 | MICRORNA164B (MIR164B)              | Encodes a micr 5_2853399      | 5    | proximal promoter |
| AT4G09460 | MYB DOMAIN PROTEIN 6 (MYB6)         | Encodes myb6 1_4_5992911      | 5    | promoter          |
| AT5G01350 | na                                  | unknown proteir 5_147279      | 5    | promoter          |
| AT5G50450 | na                                  | HCP-like superf 5_20544797    | 5    | promoter          |
| AT1G30050 | na                                  | unknown proteir 1_10542282    | 5    | proximal promoter |
| AT1G21010 | na                                  | unknown proteir 1_7346214     | 5    | five_prime_UTR    |
| AT2G44220 | na                                  | Protein of Unkn 2_18286377    | 5    | intergenic        |
| AT2G44230 | na                                  | Plant protein of 2_18286377   | 5    | promoter          |
| AT3G06540 | RAB ESCORT PROTEIN (REP)            | Encodes a cyto 3_2034572      | 5    | intergenic        |
| AT1G11350 | S-DOMAIN-1 13 (SD1-13)              | S-domain-1 13 1_3820892       | 5    | promoter          |
| AT5G01360 | TRICHOME BIREFRINGENCE-LIKE 3 (TE   | Encodes a merr 5_147279       | 5    | downstream        |
| AT5G56270 | WRKY DNA-BINDING PROTEIN 2 (WRK)    | Encodes WRKY 5_22779546       | 5    | promoter          |
| AT2G39770 | CYTOKINESIS DEFECTIVE 1 (CYT1)      | Encodes a GDF 2_16588489      | 4.99 | promoter          |
| AT4G19040 | ENHANCED DISEASE RESISTANCE 2 (E    | Encodes a PH ε 4_10437861     | 4.99 | promoter          |
| AT4G38580 | FARNESYLATED PROTEIN 6 (FP6)        | putative farnesy 4_18033859   | 4.99 | proximal promoter |
| AT4G13850 | GLYCINE-RICH RNA-BINDING PROTEIN    | Encodes a glyci 4_8020725     | 4.99 | promoter          |
| AT4G36910 | LOSS OF THE TIMING OF ET AND JA BI  | Encodes a singl 4_17395753    | 4.99 | proximal promoter |
| AT5G55230 | MICROTUBULE-ASSOCIATED PROTEIN      | Binds and bund 5_22400907     | 4.99 | proximal promoter |
| AT3G60340 | na                                  | alpha/beta-Hydr 3_22304017    | 4.99 | promoter          |
| AT3G03140 | na                                  | Tudor/PWWP/In 3_723847        | 4.99 | promoter          |
| AT4G12735 | na                                  | unknown proteir 4_7494397     | 4.99 | promoter          |
| AT4G12740 | na                                  | HhH-GPD base 4_7494397        | 4.99 | downstream        |
| AT1G54150 | na                                  | E3 Ubiquitin lig 1_20215311   | 4.99 | promoter          |
| AT2G36970 | na                                  | UDP-Glycosyltr 2_15528219     | 4.99 | proximal promoter |
| AT5G55220 | na                                  | trigger factor tyr 5_22400907 | 4.99 | downstream        |
| AT5G53900 | na                                  | Serine/threonin 5_21884112    | 4.99 | proximal promoter |
| AT4G14540 | NUCLEAR FACTOR Y, SUBUNIT B3 (NF-   | nuclear factor Y 4_8344486    | 4.99 | promoter          |
| AT4G38570 | PROBABLE CDP-DIACYLGLYCEROL--IN     | probable CDP-c 4_18033859     | 4.99 | promoter          |

|           |                                    |                             |      |                   |
|-----------|------------------------------------|-----------------------------|------|-------------------|
| AT3G15060 | RAB GTPASE HOMOLOG A1G (RABA1g)    | RAB GTPase hr 3_5069107     | 4.99 | promoter          |
| AT5G07000 | SULFOTRANSFERASE 2B (ST2B)         | Encodes a merr 5_2171659    | 4.99 | exon              |
| AT1G54140 | TATA BINDING PROTEIN ASSOCIATED I  | putative TATA t 1_20215311  | 4.99 | promoter          |
| AT3G08710 | THIOREDOXIN H-TYPE 9 (TH9)         | Associated to pl 3_2647621  | 4.99 | intergenic        |
| AT1G09850 | XYLEM BARK CYSTEINE PEPTIDASE 3 (  | Arabidopsis tha 1_3201716   | 4.99 | promoter          |
| AT4G33300 | ADR1-LIKE 1 (ADR1-L1)              | Encodes a merr 4_16054103   | 4.98 | five_prime_UTR    |
| AT3G51920 | CALMODULIN 9 (CAM9)                | encodes a diver 3_19266937  | 4.98 | intergenic        |
| AT3G51910 | HEAT SHOCK TRANSCRIPTION FACTOR I  | member of Heat 3_19266937   | 4.98 | intergenic        |
| AT3G12980 | HISTONE ACETYLTRANSFERASE OF TH    | Encodes an enz 3_4146284    | 4.98 | promoter          |
| AT1G03515 | na                                 | pre-tRNA; tRNA 1_877763     | 4.98 | downstream        |
| AT1G03520 | na                                 | Core-2/I-branch 1_877763    | 4.98 | downstream        |
| AT4G33310 | na                                 | unknown protei 4_16054103   | 4.98 | proximal promoter |
| AT5G12340 | na                                 | unknown protei 5_3994009    | 4.98 | promoter          |
| AT1G75860 | na                                 | unknown protei 1_28486094   | 4.98 | promoter          |
| AT1G75870 | na                                 | unknown protei 1_28486094   | 4.98 | promoter          |
| AT2G38260 | na                                 | pseudogene, sii 2_16028841  | 4.98 | promoter          |
| AT3G12977 | na                                 | NAC (No Apical 3_4146284    | 4.98 | intergenic        |
| AT3G12130 | na                                 | KH domain-con 3_3866699     | 4.98 | promoter          |
| AT3G51915 | na                                 | unknown protei 3_19266937   | 4.98 | intergenic        |
| AT5G49690 | na                                 | UDP-Glycosyltr 5_20189981   | 4.98 | exon              |
| AT4G39615 | na                                 | pre-tRNA; tRNA 4_18395142   | 4.98 | downstream        |
| AT5G61560 | na                                 | U-box domain-c 5_24752063   | 4.98 | proximal promoter |
| AT1G49240 | ACTIN 8 (ACT8)                     | Member of a su 1_18215746   | 4.97 | promoter          |
| AT4G29900 | AUTOINHIBITED CA(2+)-ATPASE 10 (AC | one of the type 4_14619565  | 4.97 | five_prime_UTR    |
| AT5G57180 | CHLOROPLAST IMPORT APPARATUS 2     | Transcription re 5_23167797 | 4.97 | promoter          |
| AT4G02130 | GALACTURONOSYLTRANSFERASE 6 (C     | Encodes a prote 4_948372    | 4.97 | proximal promoter |
| AT3G16360 | HPT PHOSPHOTRANSMITTER 4 (AHP4)    | Encodes AHP4, 3_5551211     | 4.97 | intergenic        |
| AT2G19780 | na                                 | Leucine-rich re 2_8524278   | 4.97 | five_prime_UTR    |
| AT2G47660 | na                                 | unknown protei 2_19543620   | 4.97 | intergenic        |
| AT2G31370 | na                                 | Basic-leucine zi 2_13381809 | 4.97 | intergenic        |
| AT2G47670 | na                                 | Plant invertase/ 2_19543620 | 4.97 | intergenic        |
| AT3G07320 | na                                 | O-Glycosyl hyd 3_2332644    | 4.97 | exon              |
| AT5G15870 | na                                 | glycosyl hydrola 5_5184890  | 4.97 | promoter          |
| AT5G15880 | na                                 | unknown protei 5_5184890    | 4.97 | proximal promoter |
| AT5G44320 | na                                 | Eukaryotic trans 5_17856862 | 4.97 | promoter          |
| AT2G02220 | PHYTOSULFOKIN RECEPTOR 1 (PSKR1    | Encodes a prote 2_587303    | 4.97 | promoter          |
| AT3G04280 | RESPONSE REGULATOR 22 (RR22)       | Encodes an aty 3_1132739    | 4.97 | proximal promoter |
| AT2G31380 | SALT TOLERANCE HOMOLOGUE (STH)     | a B-box zinc fin 2_13381809 | 4.97 | promoter          |
| AT2G29090 | CYTOCHROME P450, FAMILY 707, SUBF  | Encodes a prote 2_12494263  | 4.96 | intergenic        |
| AT2G29080 | FTSH PROTEASE 3 (ftsh3)            | encodes an Fts 2_12494263   | 4.96 | proximal promoter |
| AT1G28440 | HAESA-LIKE 1 (HSL1)                | HAESA-like 1 (t 1_9996799   | 4.96 | promoter          |
| AT4G05470 | na                                 | RNI-like superfa 4_2765505  | 4.96 | promoter          |
| AT2G46060 | na                                 | transmembrane 2_18945269    | 4.96 | promoter          |
| AT3G45260 | na                                 | C2H2-like zinc f 3_16599292 | 4.96 | proximal promoter |
| AT3G48460 | na                                 | GDSL-like Lipas 3_17948330  | 4.96 | proximal promoter |
| AT4G30710 | QWRF DOMAIN CONTAINING 8 (QWRF)    | Family of unkno 4_14970583  | 4.96 | proximal promoter |
| AT4G25350 | SHORT HYPOCOTYL UNDER BLUE1 (SH    | SHB1 encodes 4_12967206     | 4.96 | proximal promoter |
| AT4G37330 | CYTOCHROME P450, FAMILY 81, SUBF   | member of CYP 4_17562380    | 4.95 | three_prime_UTR   |
| AT4G37320 | CYTOCHROME P450, FAMILY 81, SUBF   | member of CYP 4_17562380    | 4.95 | proximal promoter |
| AT3G08940 | LIGHT HARVESTING COMPLEX PHOTO     | Lhcb4.2 protein 3_2717501   | 4.95 | promoter          |
| AT5G65070 | MADS AFFECTING FLOWERING 4 (MAF    | Encodes MADS 5_25991723     | 4.95 | proximal promoter |
| AT1G11970 | na                                 | Ubiquitin-like su 1_4044387 | 4.95 | exon              |
| AT1G77250 | na                                 | RING/FYVE/PH 1_29023626     | 4.95 | promoter          |
| AT2G41710 | na                                 | Integrase-type I 2_17403179 | 4.95 | promoter          |
| AT3G08630 | na                                 | Protein of unknc 3_2620711  | 4.95 | promoter          |
| AT4G37225 | na                                 | Potential natura 4_17517052 | 4.95 | promoter          |
| AT4G37230 | na                                 | Photosystem II r 4_17517052 | 4.95 | intron            |
| AT1G26916 | na                                 | unknown protei 1_9327227    | 4.95 | exon              |
| AT3G08930 | na                                 | LMBR1-like mei 3_2717501    | 4.95 | downstream        |
| AT5G53310 | na                                 | myosin heavy ci 5_21634315  | 4.95 | promoter          |
| AT5G62570 | na                                 | Calmodulin binc 5_25114070  | 4.95 | promoter          |
| AT5G53300 | UBIQUITIN-CONJUGATING ENZYME 10    | Encodes a ubiq 5_21634315   | 4.95 | promoter          |
| AT3G14590 | (NTMC2T6.2)                        | NTMC2T6.2; C3_4908101       | 4.94 | promoter          |
| AT1G68552 | CONSERVED PEPTIDE UPSTREAM OPE     | Upstream open 1_25724979    | 4.94 | intergenic        |
| AT4G23220 | CYSTEINE-RICH RLK (RECEPTOR-LIKE   | Encodes a cyst 4_12153587   | 4.94 | intergenic        |
| AT1G68550 | CYTOKININ RESPONSE FACTOR 10 (CF   | encodes a mem 1_25724979    | 4.94 | intergenic        |
| AT3G22100 | na                                 | basic helix-loop 3_7784645  | 4.94 | promoter          |
| AT1G04985 | na                                 | unknown protei 1_1418605    | 4.94 | promoter          |
| AT1G04990 | na                                 | Zinc finger C-x8 1_1418605  | 4.94 | intergenic        |
| AT1G79700 | na                                 | Integrase-type I 1_29990817 | 4.94 | exon              |
| AT4G37175 | na                                 | pre-tRNA; tRNA 4_17502541   | 4.94 | proximal promoter |
| AT4G23215 | na                                 | pseudogene of 4_12153587    | 4.94 | promoter          |
| AT1G04480 | na                                 | Ribosomal prote 1_1215856   | 4.94 | promoter          |
| AT1G05960 | na                                 | ARM repeat sup 1_1815540    | 4.94 | promoter          |
| AT1G72500 | na                                 | LOCATED IN: p 1_27300170    | 4.94 | proximal promoter |
| AT5G44570 | na                                 | unknown protei 5_17964240   | 4.94 | promoter          |
| AT5G51795 | na                                 | DNA/RNA-bindin 5_21042239   | 4.94 | intergenic        |
| AT5G56220 | na                                 | P-loop containir 5_22754680 | 4.94 | promoter          |
| AT5G44569 | na                                 | na 5_17964240               | 4.94 | intergenic        |
| AT5G53110 | na                                 | RING/U-box sup 5_21532346   | 4.94 | intron            |
| AT1G06160 | OCTADECANOID-RESPONSIVE ARABID     | encodes a mem 1_1882739     | 4.94 | promoter          |
| AT5G53120 | SPERMIDINE SYNTHASE 3 (SPDS3)      | encodes a nove 5_21532346   | 4.94 | proximal promoter |
| AT4G00440 | TON1 RECRUITING MOTIF 15 (TRM15)   | FUNCTIONS IN 4_193436       | 4.94 | promoter          |
| AT3G18010 | WUSCHEL RELATED HOMEBOX 1 (WU      | Encodes a WU: 3_6160987     | 4.94 | downstream        |
| AT1G30330 | AUXIN RESPONSE FACTOR 6 (ARF6)     | Encodes a merr 1_10685776   | 4.93 | downstream        |
| AT1G75240 | HOMEBOX PROTEIN 33 (HB33)          | Encodes a zinc 1_28239742   | 4.93 | proximal promoter |
| AT1G69030 | na                                 | BSD domain-co 1_25952036    | 4.93 | proximal promoter |
| AT5G40800 | na                                 | unknown protei 5_16333514   | 4.93 | intergenic        |
| AT2G41410 | na                                 | Calcium-binding 2_17262792  | 4.93 | five_prime_UTR    |
| AT5G62820 | na                                 | Uncharacterise 5_25225140   | 4.93 | promoter          |
| AT5G67430 | na                                 | Acyl-CoA N-acy 5_26912614   | 4.93 | intergenic        |
| AT5G67440 | NAKED PINS IN YUC MUTANTS 3 (NPY3  | A member of the 5_26912614  | 4.93 | downstream        |
| AT4G37760 | SQUALENE EPOXIDASE 3 (SQE3)        | squalene epoxi 4_17748713   | 4.93 | intergenic        |
| AT1G75010 | ACCUMULATION AND REPLICATION OF    | Encodes ARC3 1_28170919     | 4.92 | proximal promoter |

|           |                                   |                   |                |      |                   |
|-----------|-----------------------------------|-------------------|----------------|------|-------------------|
| AT5G46690 | BETA HLH PROTEIN 71 (bHLH071)     | beta HLH protei   | 5_18944301     | 4.92 | proximal promoter |
| AT5G03280 | ETHYLENE INSENSITIVE 2 (EIN2)     | Involved in ethy  | 5_793635       | 4.92 | intergenic        |
| AT1G75750 | GAST1 PROTEIN HOMOLOG 1 (GASA1)   | GA-responsive     | 1_28443530     | 4.92 | proximal promoter |
| AT1G75700 | HVA22-LIKE PROTEIN G (HVA22G)     | HVA22-like prot   | 1_28423408     | 4.92 | promoter          |
| AT5G03290 | ISOCITRATE DEHYDROGENASE V (IDH)  | Encodes a cata    | 5_793635       | 4.92 | promoter          |
| AT1G75690 | LOW QUANTUM YIELD OF PHOTOSYST    | DnaJ/Hsp40 cy:    | 1_28423408     | 4.92 | promoter          |
| AT1G75020 | LYSOPHOSPHATIDYL ACYLTRANSFER     | lysophosphatidyl  | 1_28170919     | 4.92 | promoter          |
| AT1G01980 | na                                | member of Reti    | 1_342252       | 4.92 | promoter          |
| AT1G23440 | na                                | Peptidase C15,    | 1_8321580      | 4.92 | promoter          |
| AT2G36600 | na                                | pre-tRNA; tRNA    | 2_15345753     | 4.92 | promoter          |
| AT4G27595 | na                                | Plant protein of  | 4_13777541     | 4.92 | promoter          |
| AT5G03285 | na                                | other RNA         | 5_793635       | 4.92 | exon              |
| AT1G66150 | TRANSMEMBRANE KINASE 1 (TMK1)     | receptor-like tra | 1_24631344     | 4.92 | promoter          |
| AT3G27520 | na                                | unknown protei    | 3_10192207     | 4.91 | promoter          |
| AT3G24490 | na                                | Alcohol dehydr    | 3_8910711      | 4.91 | promoter          |
| AT2G39220 | PATATIN-LIKE PROTEIN 6 (PLP6)     | PATATIN-like pi   | 2_16377025     | 4.91 | promoter          |
| AT4G24040 | TREHALASE 1 (TRE1)                | Encodes a treh    | 4_12488025     | 4.91 | promoter          |
| AT1G58520 | (RXW8)                            | RXW8; FUNCT       | 1_21732451     | 4.9  | intron            |
| AT5G35360 | ACETYL CO-ENZYME A CARBOXYLASE    | Encodes biotin    | 5_13584104     | 4.9  | promoter          |
| AT2G34490 | CYTOCHROME P450, FAMILY 710, SUB  | Encodes a prot    | 2_14535788     | 4.9  | three_prime_UTR   |
| AT1G09810 | EVOLUTIONARILY CONSERVED C-TER    | evolutionarily    | cc 1_3180559   | 4.9  | intergenic        |
| AT2G20750 | EXPANSIN B1 (EXPB1)               | member of BET     | 2_8940996      | 4.9  | promoter          |
| AT3G24927 | na                                | pseudogene of     | 3_9103659      | 4.9  | intron            |
| AT1G09800 | na                                | Pseudouridine     | ε 1_3180559    | 4.9  | promoter          |
| AT1G15670 | na                                | Galactose oxid    | 1_5387002      | 4.9  | proximal promoter |
| AT5G41140 | na                                | Myosin heavy c    | 5_16469533     | 4.9  | intron            |
| AT4G34490 | CYCLASE ASSOCIATED PROTEIN 1 (CA  | CYCLASE ASS       | 4_16484043     | 4.89 | intergenic        |
| AT4G09180 | FLOWERING BHLH 2 (FBH2)           | basic helix-loop  | 4_5847259      | 4.89 | promoter          |
| AT5G66320 | GATA TRANSCRIPTION FACTOR 5 (GAT  | Encodes GATA      | 5_26495847     | 4.89 | downstream        |
| AT4G34480 | na                                | O-Glycosyl hyd    | 4_16484043     | 4.89 | promoter          |
| AT5G23610 | na                                | INVOLVED IN:      | I 5_7960336    | 4.89 | promoter          |
| AT2G22320 | na                                | unknown protei    | 2_9481106      | 4.89 | intergenic        |
| AT1G49010 | na                                | Duplicated hom    | 1_18132492     | 4.89 | promoter          |
| AT1G71970 | na                                | unknown protei    | 1_27092614     | 4.89 | promoter          |
| AT2G26690 | na                                | Major facilitator | 2_11350071     | 4.89 | intron            |
| AT2G26692 | na                                | Potential natura  | 2_11350071     | 4.89 | proximal promoter |
| AT2G41200 | na                                | unknown protei    | 2_17171628     | 4.89 | five_prime_UTR    |
| AT2G01410 | na                                | NHL domain-co     | 2_176548       | 4.89 | promoter          |
| AT3G59470 | na                                | Far-red impair    | 3_21980791     | 4.89 | promoter          |
| AT5G23630 | PHOSPHATE DEFICIENCY RESPONSE :   | A member of the   | 5_7960336      | 4.89 | downstream        |
| AT1G04010 | PHOSPHOLIPID STEROL ACYL TRANS    | phospholipid ste  | 1_1036295      | 4.89 | promoter          |
| AT3G02180 | SPIRAL1-LIKE3 (SP1L3)             | SPIRAL1-LIKE3     | 3_402683       | 4.89 | proximal promoter |
| AT4G01100 | ADENINE NUCLEOTIDE TRANSPORTER    | adenine nucleot   | 4_480426       | 4.88 | intergenic        |
| AT5G60910 | AGAMOUS-LIKE 8 (AGL8)             | MADS box gene     | 5_24508609     | 4.88 | proximal promoter |
| AT3G45970 | EXPANSIN-LIKE A1 (EXLA1)          | member of EXP     | 3_16896064     | 4.88 | promoter          |
| AT5G58560 | FARNESOL KINASE (FOLK)            | FOLK is a farn    | 5_23670310     | 4.88 | promoter          |
| AT3G59400 | GENOMES UNCOUPLED 4 (GUN4)        | GUN, genomes      | 3_21948418     | 4.88 | intergenic        |
| AT1G78380 | GLUTATHIONE S-TRANSFERASE TAU 1   | Encodes a gluta   | 1_29488738     | 4.88 | proximal promoter |
| AT1G05340 | na                                | unknown protei    | 1_1559960      | 4.88 | promoter          |
| AT1G05350 | na                                | NAD(P)-binding    | 1_1559960      | 4.88 | intergenic        |
| AT3G23750 | na                                | Leucine-rich r    | ε 3_8561635    | 4.88 | downstream        |
| AT3G23760 | na                                | FUNCTIONS IN      | 3_8561635      | 4.88 | intergenic        |
| AT4G23103 | na                                | This gene enc     | 4_12109276     | 4.88 | proximal promoter |
| AT1G56350 | na                                | Peptide chain     | re 1_21094609  | 4.88 | promoter          |
| AT1G75880 | na                                | SGNH hydrolas     | 1_28489261     | 4.88 | proximal promoter |
| AT2G01300 | na                                | unknown protei    | 2_151833       | 4.88 | promoter          |
| AT1G56345 | na                                | Pseudouridine     | ε 1_21094609   | 4.88 | promoter          |
| AT3G59390 | na                                | unknown protei    | 3_21948418     | 4.88 | downstream        |
| AT4G01110 | na                                | unknown protei    | 4_480426       | 4.88 | exon              |
| AT4G34220 | na                                | Leucine-rich      | re 4_16385110  | 4.88 | proximal promoter |
| AT4G11010 | NUCLEOSIDE DIPHOSPHATE KINASE 3   | nucleoside diph   | 4_6734413      | 4.88 | promoter          |
| AT5G54290 | (CcdA)                            | Encodes CcdA,     | 5_22050539     | 4.87 | promoter          |
| AT3G08580 | ADP/ATP CARRIER 1 (AAC1)          | mitochondrial     | A1 3_2607888   | 4.87 | promoter          |
| AT5G50920 | CLPC HOMOLOGUE 1 (CLPC1)          | Encodes a prot    | 5_20720872     | 4.87 | promoter          |
| AT1G12610 | DWARF AND DELAYED FLOWERING 1     | Encodes a merr    | 1_4292153      | 4.87 | proximal promoter |
| AT4G14270 | na                                | Protein contain   | 4_8218318      | 4.87 | promoter          |
| AT1G16950 | na                                | unknown protei    | 1_5794644      | 4.87 | proximal promoter |
| AT2G38250 | na                                | Homeodomain-l     | 2_16017071     | 4.87 | proximal promoter |
| AT4G28330 | na                                | unknown protei    | 4_14023173     | 4.87 | promoter          |
| AT5G39530 | na                                | Protein of unkn   | 5_15828734     | 4.87 | proximal promoter |
| AT1G49750 | na                                | Leucine-rich      | re 1_18411727  | 4.87 | exon              |
| AT1G74330 | na                                | Protein kinase    | ε 1_27947427   | 4.87 | promoter          |
| AT1G26916 | na                                | unknown protei    | 1_9326001      | 4.87 | proximal promoter |
| AT3G26486 | na                                | transposable      | elk 3_9699575  | 4.87 | intergenic        |
| AT5G04880 | na                                | pseudogene of     | 5_1422748      | 4.87 | promoter          |
| AT5G04238 | na                                | This gene enc     | 5_1169059      | 4.87 | downstream        |
| AT5G04885 | na                                | Glycosyl hydro    | 5_1422748      | 4.87 | promoter          |
| AT4G27800 | THYLAKOID-ASSOCIATED PHOSPHATA    | Chloroplast prot  | 4_13854216     | 4.87 | promoter          |
| AT3G01700 | ARABINO GALACTAN PROTEIN 11 (AGP  | Encodes an ara    | 3_258567       | 4.86 | promoter          |
| AT3G25690 | CHLOROPLAST UNUSUAL POSITIONING   | actin binding pr  | 3_9359548      | 4.86 | intergenic        |
| AT1G04310 | ETHYLENE RESPONSE SENSOR 2 (ERS   | encodes an eth    | 1_1157817      | 4.86 | promoter          |
| AT1G04050 | HOMOLOG OF SU(VAR)3-9 1 (SUVR1)   | Encodes SUVR      | 1_1049981      | 4.86 | proximal promoter |
| AT5G56490 | L-GULONONO-1,4-LACTONE (L-GULL) O | D-arabinono-1,    | 4_22871441     | 4.86 | promoter          |
| AT5G65676 | na                                | transposable      | elk 5_26257485 | 4.86 | proximal promoter |
| AT5G11475 | na                                | pre-tRNA; tRNA    | 5_3668936      | 4.86 | downstream        |
| AT1G12080 | na                                | Vacuolar calci    | 1_4086529      | 4.86 | intergenic        |
| AT3G01690 | na                                | alpha/beta-Hyd    | 3_258567       | 4.86 | downstream        |
| AT3G25700 | na                                | Eukaryotic aspa   | 3_9359548      | 4.86 | exon              |
| AT3G18830 | POLYOL/MONOSACCHARIDE TRANSPC     | This gene enc     | 3_6493614      | 4.86 | proximal promoter |
| AT4G16990 | RESISTANCE TO LEPTOSPHAERIA MAC   | RESISTANCE 1      | 4_9559989      | 4.86 | promoter          |
| AT4G36360 | BETA-GALACTOSIDASE 3 (BGAL3)      | putative beta-g   | 4_17182228     | 4.85 | proximal promoter |
| AT2G40080 | EARLY FLOWERING 4 (ELF4)          | Encodes a nove    | 2_16735019     | 4.85 | promoter          |
| AT3G30775 | EARLY RESPONSIVE TO DEHYDRATION   | Encodes a proli   | 3_12451925     | 4.85 | proximal promoter |
| AT3G51880 | HIGH MOBILITY GROUP B1 (HMG B1)   | Encodes a prot    | 3_19249154     | 4.85 | promoter          |



|           |                                   |                               |      |                   |
|-----------|-----------------------------------|-------------------------------|------|-------------------|
| AT2G28355 | LOW-MOLECULAR-WEIGHT CYSTEINE-    | low-molecular-w 2_12117971    | 4.85 | proximal promoter |
| AT5G07260 | na                                | START (STAR-r 5_2280560       | 4.85 | intergenic        |
| AT3G62940 | na                                | Cysteine protei 3_23265053    | 4.85 | promoter          |
| AT2G40081 | na                                | unknown proteir 2_16735019    | 4.85 | exon              |
| AT1G71150 | na                                | unknown proteir 1_26826852    | 4.85 | promoter          |
| AT3G51890 | na                                | Clathrin light ch: 3_19249154 | 4.85 | intergenic        |
| AT5G18460 | na                                | Protein of Unkn 5_6122694     | 4.85 | promoter          |
| AT5G04020 | na                                | calmodulin bindi 5_1087556    | 4.85 | proximal promoter |
| AT1G34370 | SENSITIVE TO PROTON RHIZOTOXICIT  | Encodes a puta 1_12550323     | 4.85 | promoter          |
| AT5G07270 | XB3 ORTHOLOG 3 IN ARABIDOPSIS TH  | XB3 ortholog 3 i 5_2280560    | 4.85 | promoter          |
| AT2G36870 | XYLOGLUCAN ENDOTRANSGLUCOSYL      | xyloglucan endc 2_15474810    | 4.85 | promoter          |
| AT1G28130 | (GH3.17)                          | encodes an IAA 1_9828354      | 4.84 | intergenic        |
| AT3G63210 | (MARD1)                           | encodes a nove 3_23352461     | 4.84 | intergenic        |
| AT4G29330 | DERLIN-1 (DER1)                   | DERLIN-1 (DEF 4_14444626      | 4.84 | promoter          |
| AT3G60530 | GATA TRANSCRIPTION FACTOR 4 (GAT  | Encodes a merr 3_22368832     | 4.84 | intergenic        |
| AT3G50700 | INDETERMINATE(ID)-DOMAIN 2 (IDD2) | zinc finger prote 3_18843298  | 4.84 | intergenic        |
| AT4G11985 | na                                | pre-tRNA; tRNA 4_7185600      | 4.84 | promoter          |
| AT2G43795 | na                                | unknown proteir 2_18143532    | 4.84 | proximal promoter |
| AT1G28135 | na                                | unknown proteir 1_9828354     | 4.84 | proximal promoter |
| AT1G56210 | na                                | Heavy metal tra 1_21036996    | 4.84 | exon              |
| AT5G50000 | na                                | Protein kinase s 5_20344341   | 4.84 | intron            |
| AT4G11980 | NUDIX HYDROLASE HOMOLOG 14 (NUI   | nudix hydrolase 4_7185600     | 4.84 | promoter          |
| AT3G29250 | SHORT-CHAIN DEHYDROGENASE RED     | NAD(P)-binding 3_11195489     | 4.84 | promoter          |
| AT5G52560 | UDP-SUGAR PYROPHOSPHORYLASE (     | Encodes a prot 5_21330425     | 4.84 | promoter          |
| AT1G73602 | CONSERVED PEPTIDE UPSTREAM OPE    | Upstream open 1_27670440      | 4.83 | promoter          |
| AT3G61610 | na                                | Galactose muta 3_22798336     | 4.83 | proximal promoter |
| AT4G09190 | na                                | F-box and asso 4_5851840      | 4.83 | intergenic        |
| AT5G44670 | na                                | Domain of unkn 5_18022137     | 4.83 | proximal promoter |
| AT2G17723 | na                                | Encodes a defe 2_7701264      | 4.83 | intergenic        |
| AT2G19090 | na                                | Protein of unkn 2_8269400     | 4.83 | proximal promoter |
| AT1G10650 | na                                | SBP (S-ribonuc 1_3526453      | 4.83 | promoter          |
| AT1G73600 | na                                | S-adenosyl-L-m 1_27670440     | 4.83 | intron            |
| AT4G16670 | na                                | CONTAINS Inte 4_9383201       | 4.83 | proximal promoter |
| AT4G40050 | na                                | FUNCTIONS IN 4_18566679       | 4.83 | proximal promoter |
| AT5G16550 | na                                | unknown proteir 5_5405330     | 4.83 | promoter          |
| AT3G61600 | POZ/BTB CONTAININ G-PROTEIN 1 (PO | POZ/BTB conta 3_22798336      | 4.83 | downstream        |
| AT4G30960 | SOS3-INTERACTING PROTEIN 3 (SIP3) | Encodes CBL-ir 4_15063361     | 4.83 | intergenic        |
| AT5G16540 | ZINC FINGER NUCLEASE 3 (ZFN3)     | Encodes a zinc 5_5405330      | 4.83 | downstream        |
| AT4G29670 | ATYPICAL CYS HIS RICH THIOREDOXII | Encodes a merr 4_14537339     | 4.82 | promoter          |
| AT4G29660 | EMBRYO DEFECTIVE 2752 (EMB2752)   | EMBRYO DEFE 4_14537339        | 4.82 | proximal promoter |
| AT2G39270 | na                                | P-loop containir 2_16399890   | 4.82 | promoter          |
| AT2G39260 | na                                | binding;RNA bir 2_16399890    | 4.82 | promoter          |
| AT2G23790 | na                                | Protein of unkn 2_10127752    | 4.82 | promoter          |
| AT4G21926 | na                                | unknown proteir 4_11638944    | 4.82 | three_prime_UTR   |
| AT4G21930 | na                                | Protein of unkn 4_11638944    | 4.82 | proximal promoter |
| AT4G24760 | na                                | alpha/beta-Hydr 4_12764246    | 4.82 | promoter          |
| AT5G38520 | na                                | alpha/beta-Hydr 5_15421436    | 4.82 | promoter          |
| AT5G48900 | na                                | Pectin lyase-like 5_19826807  | 4.82 | intron            |
| AT5G38510 | na                                | Rhomboid-relat 5_15421436     | 4.82 | proximal promoter |
| AT3G57990 | na                                | unknown proteir 3_21471639    | 4.82 | promoter          |
| AT4G14620 | na                                | Protein of unkn 4_8387881     | 4.82 | intergenic        |
| AT5G23100 | na                                | Protein of unkn 5_7753376     | 4.82 | promoter          |
| AT1G73010 | PHOSPHATE STARVATION-INDUCED G    | Encodes PPsPz 1_27467386      | 4.82 | proximal promoter |
| AT2G23320 | WRKY DNA-BINDING PROTEIN 15 (WRK  | Encodes WRKY 2_9923732        | 4.82 | proximal promoter |
| AT5G25460 | DUF642 L-GALL RESPONSIVE GENE 2   | Protein of unkn 5_8863327     | 4.81 | promoter          |
| AT1G78630 | EMBRYO DEFECTIVE 1473 (emb1473)   | embryo defectiv 1_29575905    | 4.81 | promoter          |
| AT1G07660 | na                                | Histone superfa 1_2368590     | 4.81 | promoter          |
| AT1G79420 | na                                | Protein of unkn 1_29872938    | 4.81 | intron            |
| AT1G80250 | na                                | pre-tRNA; tRNA 1_30173980     | 4.81 | downstream        |
| AT1G03440 | na                                | Leucine-rich rep 1_850763     | 4.81 | proximal promoter |
| AT1G78620 | na                                | Protein of unkn 1_29575905    | 4.81 | promoter          |
| AT3G14830 | na                                | unknown proteir 3_4986016     | 4.81 | downstream        |
| AT3G14840 | na                                | Leucine-rich rep 3_4986016    | 4.81 | proximal promoter |
| AT1G73990 | SIGNAL PEPTIDE PEPTIDASE (SPPA)   | Encodes a puta 1_27824239     | 4.81 | promoter          |
| AT1G71010 | FORMS APLOID AND BINUCLEATE CEL   | Encodes a prot 1_26782076     | 4.8  | proximal promoter |
| AT3G48070 | na                                | RING/U-box suj 3_17750587     | 4.8  | promoter          |
| AT4G15260 | na                                | UDP-Glycosyltr: 4_8715123     | 4.8  | exon              |
| AT5G22690 | na                                | Disease resist 5_7541116      | 4.8  | promoter          |
| AT1G50020 | na                                | unknown proteir 1_18521886    | 4.8  | promoter          |
| AT1G05070 | na                                | Protein of unkn 1_1458859     | 4.8  | promoter          |
| AT5G11680 | na                                | FUNCTIONS IN 5_3758787        | 4.8  | promoter          |
| AT4G36660 | na                                | Protein of unkn 4_17287980    | 4.8  | proximal promoter |
| AT5G45360 | na                                | F-box family prc 5_18387862   | 4.8  | proximal promoter |
| AT5G45370 | na                                | nodulin MIN21-l 5_18387862    | 4.8  | promoter          |
| AT4G36670 | POLYOL/MONOSACCHARIDE TRANSPC     | Major facilitator 4_17287980  | 4.8  | exon              |
| AT1G04240 | SHORT HYPOCOTYL 2 (SHY2)          | SHY2/IAA3 req 1_1131853       | 4.8  | proximal promoter |
| AT5G56210 | WPP DOMAIN INTERACTING PROTEIN ;  | Encodes an out 5_22752937     | 4.8  | promoter          |
| AT2G28560 | (RAD51B)                          | Encodes a prot 2_12240409     | 4.79 | proximal promoter |
| AT3G25620 | ATP-BINDING CASSETTE G21 (ABCG21  | ABC-2 type tran 3_9315797     | 4.79 | intergenic        |
| AT1G32900 | GRANULE BOUND STARCH SYNTHASE     | UDP-Glycosyltr: 1_11923896    | 4.79 | promoter          |
| AT1G75240 | HOMEODOMAIN PROTEIN 33 (HB33)     | Encodes a zinc 1_28241336     | 4.79 | five_prime_UTR    |
| AT4G26760 | MICROTUBULE-ASSOCIATED PROTEIN    | microtubule-ass 4_13481874    | 4.79 | promoter          |
| AT4G35510 | na                                | unknown proteir 4_16860275    | 4.79 | downstream        |
| AT1G69730 | na                                | Wall-associat 1_26230137      | 4.79 | exon              |
| AT1G22520 | na                                | Domain of unkn 1_7954539      | 4.79 | promoter          |
| AT1G71980 | na                                | Protease-assoc 1_27096808     | 4.79 | proximal promoter |
| AT1G74370 | na                                | RING/U-box suj 1_27959479     | 4.79 | promoter          |
| AT1G27200 | na                                | CONTAINS Inte 1_9452059       | 4.79 | promoter          |
| AT3G25610 | na                                | ATPase E1-E2 i 3_9315797      | 4.79 | proximal promoter |
| AT3G49890 | na                                | unknown proteir 3_18499095    | 4.79 | promoter          |
| AT5G06570 | na                                | alpha/beta-Hydr 5_2011174     | 4.79 | promoter          |
| AT5G06580 | na                                | Encodes a prot 5_2011174      | 4.79 | downstream        |
| AT2G41680 | NADPH-DEPENDENT THIOREDOXIN RE    | Encodes a NAD 2_17379252      | 4.79 | promoter          |
| AT5G15860 | PRENYLCYSTEINE METHYLESTERASE     | Encodes a prot 5_5181636      | 4.79 | promoter          |

|           |                                                     |                    |              |      |                   |
|-----------|-----------------------------------------------------|--------------------|--------------|------|-------------------|
| AT1G03060 | SPIRRIG (SPI)                                       | Encodes a WD/      | 1_727552     | 4.79 | proximal promoter |
| AT1G74380 | XYLOGLUCAN XYLOSYLTRANSFERASE                       | xyloglucan xylosyl | 1_27959479   | 4.79 | promoter          |
| AT4G25050 | ACYL CARRIER PROTEIN 4 (ACP4)                       | encodes an acyl    | 4_12869991   | 4.78 | promoter          |
| AT2G47000 | ATP-BINDING CASSETTE B4 (ABC4)                      | Encodes an atp     | 2_19310130   | 4.78 | exon              |
| AT5G41410 | BELL 1 (BEL1)                                       | Homeodomain        | 5_16579955   | 4.78 | promoter          |
| AT1G48300 | DIACYLGLYCEROL ACYLTRANSFERASE                      | unknown protei     | 1_17846984   | 4.78 | promoter          |
| AT5G22500 | FATTY ACID REDUCTASE 1 (FAR1)                       | Encodes a merr     | 5_7470303    | 4.78 | promoter          |
| AT2G28740 | HISTONE H4 (HIS4)                                   | histone 4          | 2_12330159   | 4.78 | promoter          |
| AT5G61820 | na                                                  | FUNCTIONS IN       | 5_24836787   | 4.78 | promoter          |
| AT5G61830 | na                                                  | NAD(P)-binding     | 5_24836787   | 4.78 | promoter          |
| AT5G13970 | na                                                  | unknown protei     | 5_4507996    | 4.78 | promoter          |
| AT4G28030 | na                                                  | Acyl-CoA N-acyl    | 4_13939812   | 4.78 | proximal promoter |
| AT4G28040 | na                                                  | nodulin MIN21-1    | 4_13939812   | 4.78 | proximal promoter |
| AT1G56660 | na                                                  | unknown protei     | 1_21237827   | 4.78 | promoter          |
| AT2G28720 | na                                                  | Histone superfa    | 2_12330159   | 4.78 | intergenic        |
| AT2G28730 | na                                                  | pre-tRNA; tRNA     | 2_12330159   | 4.78 | intergenic        |
| AT2G46995 | na                                                  | unknown protei     | 2_19310130   | 4.78 | proximal promoter |
| AT4G21620 | na                                                  | glycine-rich prot  | 4_11491409   | 4.78 | promoter          |
| AT5G64040 | (PSAN)                                              | Encodes the on     | 5_25629645   | 4.77 | promoter          |
| AT4G29140 | ACTIVATED DISEASE SUSCEPTIBILITY                    | Encodes Activa     | 4_14370554   | 4.77 | exon              |
| AT5G15160 | BANQUO 2 (BNQ2)                                     | BNQ2 belongs       | 1_5_4922711  | 4.77 | promoter          |
| AT2G47450 | CHAOS (CAO)                                         | A component of     | 2_19471589   | 4.77 | proximal promoter |
| AT5G51430 | EMBRYO YELLOW (EYE)                                 | Encodes a prot     | 5_20890993   | 4.77 | promoter          |
| AT5G64050 | GLUTAMATE TRNA SYNTHETASE (ERS)                     | Glutamate-tRNA     | 5_25629645   | 4.77 | downstream        |
| AT2G17220 | KINASE 3 (KIN3)                                     | Encodes a puta     | 2_7490156    | 4.77 | five_prime_UTR    |
| AT5G55230 | MICROTUBULE-ASSOCIATED PROTEIN                      | Binds and bund     | 5_22401877   | 4.77 | promoter          |
| AT1G67310 | na                                                  | Calmodulin-binc    | 1_25203122   | 4.77 | exon              |
| AT5G07730 | na                                                  | unknown protei     | 5_2458529    | 4.77 | promoter          |
| AT5G07740 | na                                                  | actin binding; F   | 1_5_2458529  | 4.77 | downstream        |
| AT5G27889 | na                                                  | This gene encod    | 5_9903425    | 4.77 | promoter          |
| AT2G23710 | na                                                  | transposable elk   | 2_10083858   | 4.77 | proximal promoter |
| AT2G30270 | na                                                  | Protein of unkn    | 2_12907815   | 4.77 | downstream        |
| AT3G01740 | na                                                  | Mitochondrial r    | 3_267672     | 4.77 | promoter          |
| AT3G15356 | na                                                  | Legume lectin f    | 3_5175635    | 4.77 | promoter          |
| AT2G47440 | na                                                  | Tetratricopeptid   | 2_19471589   | 4.77 | exon              |
| AT4G35240 | na                                                  | Protein of unkn    | 4_16767577   | 4.77 | promoter          |
| AT5G47330 | na                                                  | alpha/beta-Hydr    | 5_19206977   | 4.77 | promoter          |
| AT1G02230 | NAC DOMAIN CONTAINING PROTEIN 4                     | NAC domain co      | 1_437029     | 4.77 | promoter          |
| AT2G30260 | U2 SMALL NUCLEAR RIBONUCLEOPROTEIN                  | encodes U2B",      | 2_12907815   | 4.77 | promoter          |
| AT2G15480 | UDP-GLUCOSYL TRANSFERASE 73B5 (UGT73B5)             | UDP-glucosyl tr    | 2_6758522    | 4.77 | promoter          |
| AT1G76890 | (GT2)                                               | encodes a plant    | 1_28872826   | 4.76 | downstream        |
| AT1G77850 | AUXIN RESPONSE FACTOR 17 (ARF17)                    | Posttranscriptio   | 1_29270674   | 4.76 | proximal promoter |
| AT4G23650 | CALCIUM-DEPENDENT PROTEIN KINASE                    | Encodes calciu     | 4_12327546   | 4.76 | promoter          |
| AT5G27320 | GA INSENSITIVE DWARF1C (GID1C)                      | Encodes a gibb     | 5_9628989    | 4.76 | promoter          |
| AT1G15820 | LIGHT HARVESTING COMPLEX PHOTOACTIVATED             | Lhcb6 protein (L   | 1_5447888    | 4.76 | promoter          |
| AT4G34120 | LOSS OF THE TIMING OF ET AND JA BIOPROCESSING       | Encodes a singl    | 4_16340989   | 4.76 | promoter          |
| AT1G22180 | na                                                  | Sec14p-like phc    | 1_7830402    | 4.76 | promoter          |
| AT5G52980 | na                                                  | CONTAINS Inte      | 5_21483795   | 4.76 | promoter          |
| AT5G52990 | na                                                  | SNARE-like sup     | 5_21483795   | 4.76 | promoter          |
| AT2G42247 | na                                                  | Potential natura   | 2_17599735   | 4.76 | exon              |
| AT2G42240 | na                                                  | RNA-binding (R     | 2_17599735   | 4.76 | downstream        |
| AT1G27890 | na                                                  | Polynucleotidyl    | 1_9715258    | 4.76 | promoter          |
| AT1G27900 | na                                                  | RNA helicase f     | 2_1_9715258  | 4.76 | downstream        |
| AT1G15825 | na                                                  | hydroxyproline-r   | 1_5447888    | 4.76 | intergenic        |
| AT1G70505 | na                                                  | unknown protei     | 1_26570522   | 4.76 | promoter          |
| AT1G76892 | na                                                  | Potential natura   | 1_28872826   | 4.76 | promoter          |
| AT2G17705 | na                                                  | unknown protei     | 2_7692411    | 4.76 | promoter          |
| AT2G17710 | na                                                  | unknown protei     | 2_7692411    | 4.76 | proximal promoter |
| AT1G15810 | na                                                  | S15/NS1, RNA-      | 1_5447888    | 4.76 | intergenic        |
| AT3G45820 | na                                                  | unknown protei     | 3_16840777   | 4.76 | intron            |
| AT4G34110 | POLY(A) BINDING PROTEIN 2 (PAB2)                    | Putative poly-A    | 4_16340989   | 4.76 | intergenic        |
| AT4G23660 | POLYPRENYLTRANSFERASE 1 (PPT1)                      | Encodes para-h     | 4_12327546   | 4.76 | downstream        |
| AT5G62430 | CYCLING DOF FACTOR 1 (CDF1)                         | Dof-type zinc fir  | 5_25068328   | 4.75 | intergenic        |
| AT5G22640 | EMBRYO DEFECTIVE 1211 (emb1211)                     | EMB1211 is a l     | 5_7529208    | 4.75 | promoter          |
| AT5G38480 | GENERAL REGULATORY FACTOR 3 (GRF3)                  | general regulat    | 5_15409617   | 4.75 | promoter          |
| AT4G28490 | HAESA (HAE)                                         | member of Rec      | 4_14077449   | 4.75 | promoter          |
| AT3G27350 | na                                                  | unknown protei     | 3_10130039   | 4.75 | intergenic        |
| AT3G27360 | na                                                  | Histone superfa    | 3_10130039   | 4.75 | promoter          |
| AT2G28400 | na                                                  | Protein of unkn    | 2_12149165   | 4.75 | promoter          |
| AT3G59580 | na                                                  | Plant regulator    | 1_3_22009016 | 4.75 | promoter          |
| AT1G63010 | na                                                  | Major Facilitator  | 1_23352656   | 4.75 | intron            |
| AT2G17960 | na                                                  | unknown protei     | 2_7816606    | 4.75 | intergenic        |
| AT3G28050 | na                                                  | nodulin MIN21-1    | 3_10443969   | 4.75 | intron            |
| AT4G00200 | na                                                  | AT hook motif      | 4_85047      | 4.75 | promoter          |
| AT4G09160 | na                                                  | SEC14 cytosolic    | 4_5839676    | 4.75 | promoter          |
| AT4G16745 | na                                                  | Exostosin family   | 4_9415400    | 4.75 | intergenic        |
| AT4G32270 | na                                                  | Ubiquitin-like su  | 4_15574827   | 4.75 | downstream        |
| AT2G37040 | PHE AMMONIA LYASE 1 (pal1)                          | Encodes PAL1,      | 2_15561375   | 4.75 | proximal promoter |
| AT4G32260 | PIGMENT DEFECTIVE 334 (PDE334)                      | ATPase, F0 cor     | 4_15574827   | 4.75 | promoter          |
| AT3G19380 | PLANT U-BOX 25 (PUB25)                              | plant U-box 25     | 3_6716821    | 4.75 | proximal promoter |
| AT5G67400 | ROOT HAIR SPECIFIC 19 (RHS19)                       | root hair specif   | 5_26894453   | 4.75 | promoter          |
| AT3G27380 | SUCCINATE DEHYDROGENASE 2-1 (SDH2-1)                | One of three isc   | 3_10130039   | 4.75 | three_prime_UTR   |
| AT3G11570 | TRICHOME BIREFRINGENCE-LIKE 8 (TBL8)                | Encodes a merr     | 3_3647877    | 4.75 | promoter          |
| AT3G04670 | WRKY DNA-BINDING PROTEIN 39 (WRKY39)                | member of WRK      | 3_1269111    | 4.75 | proximal promoter |
| AT1G28130 | (GH3.17)                                            | encodes an IAA     | 1_9822418    | 4.74 | proximal promoter |
| AT5G09250 | (KIWI)                                              | putative transcr   | 5_2876638    | 4.74 | promoter          |
| AT2G45190 | ABNORMAL FLORAL ORGANS (AFO)                        | Encodes a merr     | 2_18628720   | 4.74 | intron            |
| AT5G45340 | CYTOCHROME P450, FAMILY 707, SUBFAMILY 1 (CYP707C1) | Encodes a prot     | 5_18373009   | 4.74 | proximal promoter |
| AT4G11600 | GLUTATHIONE PEROXIDASE 6 (GPX6)                     | Encodes glutath    | 4_7011498    | 4.74 | promoter          |
| AT2G39930 | ISOAMYLASE 1 (ISA1)                                 | Encodes an iso     | 2_16665629   | 4.74 | promoter          |
| AT2G42890 | MEI2-LIKE 2 (ML2)                                   | A member of me     | 2_17854513   | 4.74 | three_prime_UTR   |
| AT2G16720 | MYB DOMAIN PROTEIN 7 (MYB7)                         | Encodes a merr     | 2_7255949    | 4.74 | exon              |
| AT3G59020 | na                                                  | ARM repeat sup     | 3_21817633   | 4.74 | promoter          |
| AT1G32650 | na                                                  | unknown protei     | 1_11810002   | 4.74 | intergenic        |

|           |    |                                     |      |                   |
|-----------|----|-------------------------------------|------|-------------------|
| AT3G15430 | na | Regulator of chr 3_5208597          | 4.74 | promoter          |
| AT4G26380 | na | Cysteine/Histidi 4_13337931         | 4.74 | promoter          |
| AT1G01880 | na | 5'-3' exonucleas 1_309758           | 4.74 | proximal promoter |
| AT1G01890 | na | pre-tRNA; tRNA 1_309758             | 4.74 | promoter          |
| AT2G42900 | na | Plant basic secr 2_17854513         | 4.74 | promoter          |
| AT4G11610 | na | C2 calcium/lipid 4_7018487          | 4.74 | promoter          |
| AT4G34770 | na | SAUR-like auxir 4_16587838          | 4.74 | intergenic        |
| AT5G56365 | na | pre-tRNA; tRNA 5_22828262           | 4.74 | downstream        |
| AT5G58640 | na | Selenoprotein, f 5_23697745         | 4.74 | promoter          |
| AT3G15500 | na | NAC DOMAIN CONTAINING PROTEIN 3     | 4.74 | intergenic        |
| AT2G43040 | na | NO POLLEN GERMINATION 1 (NPG1)      | 4.74 | promoter          |
| AT2G34650 | na | PINOID (PID)                        | 4.74 | promoter          |
| AT5G24520 | na | TRANSPARENT TESTA GLABRA 1 (TTG     | 4.74 | proximal promoter |
| AT3G23730 | na | XYLOGLUCAN ENDOTRANSGLUCOSYL        | 4.74 | proximal promoter |
| AT4G24280 | na | CHLOROPLAST HEAT SHOCK PROTEIN      | 4.73 | promoter          |
| AT1G61340 | na | F-BOX STRESS INDUCED 1 (FBS1)       | 4.73 | promoter          |
| AT5G10300 | na | METHYL ESTERASE 5 (MESS)            | 4.73 | promoter          |
| AT1G55525 | na | Unknown gene 1_20728155             | 4.73 | downstream        |
| AT2G20515 | na | unknown proteir 2_8839857           | 4.73 | promoter          |
| AT3G29647 | na | transposable elk 3_11510280         | 4.73 | intergenic        |
| AT5G10290 | na | leucine-rich repi 5_3239226         | 4.73 | proximal promoter |
| AT4G31340 | na | myosin heavy ci 4_15205445          | 4.73 | promoter          |
| AT5G15780 | na | Pollen Ole e 1 a 5_5147419          | 4.73 | proximal promoter |
| AT1G04430 | na | S-adenosyl-L-m 1_1197721            | 4.73 | promoter          |
| AT1G26790 | na | Dof-type zinc fir 1_9275370         | 4.73 | promoter          |
| AT1G60010 | na | unknown proteir 1_22100041          | 4.73 | intergenic        |
| AT3G24420 | na | alpha/beta-Hydr 3_8866883           | 4.73 | proximal promoter |
| AT4G08850 | na | Leucine-rich ref 4_5640543          | 4.73 | five_prime_UTR    |
| AT4G18975 | na | Pentatricopeptid 4_10393974         | 4.73 | intron            |
| AT4G24275 | na | Identified as a s 4_12589876        | 4.73 | intergenic        |
| AT5G23340 | na | RNI-like superfa 5_7856009          | 4.73 | promoter          |
| AT5G48412 | na | na 5_19624240                       | 4.73 | promoter          |
| AT5G52530 | na | dentin sialophos 5_21317005         | 4.73 | promoter          |
| AT3G54110 | na | PLANT UNCOUPLING MITOCHONDRIAL      | 4.73 | promoter          |
| AT2G16600 | na | ROTAMASE CYP 3 (ROC3)               | 4.73 | promoter          |
| AT1G55520 | na | TATA BINDING PROTEIN 2 (TBP2)       | 4.73 | promoter          |
| AT2G20510 | na | TRANSLOCASE INNER MEMBRANE SU       | 4.73 | proximal promoter |
| AT1G73030 | na | (VPS46.2)                           | 4.72 | promoter          |
| AT4G00730 | na | ANTHOCYANINLESS 2 (ANL2)            | 4.72 | five_prime_UTR    |
| AT1G21910 | na | DEHYDRATION RESPONSE ELEMENT-E      | 4.72 | proximal promoter |
| AT5G54510 | na | DWARF IN LIGHT 1 (DFL1)             | 4.72 | intergenic        |
| AT2G28950 | na | EXPANSIN A6 (EXPA6)                 | 4.72 | proximal promoter |
| AT1G32550 | na | FERREDOXIN C 2 (FdC2)               | 4.72 | promoter          |
| AT2G44910 | na | HOMEBOX-LEUCINE ZIPPER PROTEIN      | 4.72 | intron            |
| AT5G17460 | na | unknown proteir 5_5759994           | 4.72 | promoter          |
| AT1G73020 | na | unknown proteir 1_27473750          | 4.72 | promoter          |
| AT1G64850 | na | Calcium-binding 1_24097824          | 4.72 | promoter          |
| AT1G21740 | na | Protein of unknk 1_7645474          | 4.72 | intergenic        |
| AT2G45126 | na | unknown proteir 2_18605720          | 4.72 | downstream        |
| AT3G60540 | na | Preprotein trans 3_22376144         | 4.72 | promoter          |
| AT4G13010 | na | Oxidoreductase 4_7600494            | 4.72 | promoter          |
| AT1G31885 | na | NOD26-LIKE INTRINSIC PROTEIN 3;1 (N | 4.72 | intergenic        |
| AT1G21750 | na | PDI-LIKE 1-1 (PDIL1-1)              | 4.72 | promoter          |
| AT3G20250 | na | PUMILIO 5 (PUM5)                    | 4.72 | promoter          |
| AT1G64860 | na | SIGMA FACTOR A (SIGA)               | 4.72 | promoter          |
| AT4G22756 | na | STEROL C4-METHYL OXIDASE 1-2 (SMC   | 4.72 | proximal promoter |
| AT1G56440 | na | TETRATRICOPEPTIDE REPEAT 5 (TPR5    | 4.72 | promoter          |
| AT1G32400 | na | TOBAMOVIRUS MULTIPLICATION 2A (T    | 4.72 | promoter          |
| AT3G04910 | na | WITH NO LYSINE (K) KINASE 1 (WNK1)  | 4.72 | proximal promoter |
| AT3G10920 | na | MANGANESE SUPEROXIDE DISMUTASI      | 4.71 | downstream        |
| AT3G29770 | na | METHYL ESTERASE 11 (MES11)          | 4.71 | promoter          |
| AT2G26511 | na | unknown proteir 2_11277802          | 4.71 | exon              |
| AT3G63450 | na | RNA-binding (R 3_23429965           | 4.71 | proximal promoter |
| AT3G63460 | na | transducin famil 3_23429965         | 4.71 | intergenic        |
| AT3G10930 | na | unknown proteir 3_3420059           | 4.71 | downstream        |
| AT3G10030 | na | aspartate/glutar 3_3094919          | 4.71 | five_prime_UTR    |
| AT2G26510 | na | PIGMENT DEFECTIVE EMBRYO 135 (PD    | 4.71 | downstream        |
| AT2G22680 | na | WAV3 HOMOLOG 1 (WAVH1)              | 4.71 | exon              |
| AT3G61050 | na | (NTMC2T4)                           | 4.7  | promoter          |
| AT3G16150 | na | ASPARAGINASE B1 (ASPGB1)            | 4.7  | exon              |
| AT3G01480 | na | CYCLOPHILIN 38 (CYP38)              | 4.7  | promoter          |
| AT3G51590 | na | LIPID TRANSFER PROTEIN 12 (LTP12)   | 4.7  | three_prime_UTR   |
| AT2G17480 | na | MILDEW RESISTANCE LOCUS O 8 (MLC    | 4.7  | promoter          |
| AT1G02816 | na | Protein of unknk 1_621426           | 4.7  | promoter          |
| AT1G74790 | na | catalytics; FUNK 1_28098633         | 4.7  | promoter          |
| AT1G74780 | na | Nodulin-like / M; 1_28098633        | 4.7  | intergenic        |
| AT2G47100 | na | pre-tRNA; tRNA 2_19344511           | 4.7  | downstream        |
| AT3G57770 | na | Protein kinase s 3_21397627         | 4.7  | exon              |
| AT3G57760 | na | Protein kinase s 3_21397627         | 4.7  | intergenic        |
| AT4G14930 | na | Survival protein 4_8538278          | 4.7  | promoter          |
| AT4G31860 | na | Protein phosph 4_15409175           | 4.7  | promoter          |
| AT4G32460 | na | FUNCTIONS IN 4_15663656             | 4.7  | intron            |
| AT5G40540 | na | Protein kinase s 5_16236870         | 4.7  | promoter          |
| AT1G52290 | na | PROLINE-RICH EXTENSIN-LIKE RECEP    | 4.7  | proximal promoter |
| AT3G23810 | na | S-ADENOSYL-L-HOMOCYSTEINE (SAH)     | 4.7  | intergenic        |
| AT5G62690 | na | TUBULIN BETA CHAIN 2 (TUB2)         | 4.7  | promoter          |
| AT3G57765 | na | U2 SMALL NUCLEOLAR RNA3 (U2.3)      | 4.7  | exon              |
| AT2G47110 | na | UBIQUITIN 6 (UBQ6)                  | 4.7  | promoter          |
| AT1G17720 | na | (ATB BETA)                          | 4.69 | promoter          |
| AT1G62520 | na | unknown proteir 1_23145215          | 4.69 | exon              |
| AT5G03330 | na | Cysteine proteir 5_805969           | 4.69 | proximal promoter |
| AT4G29000 | na | Tesmin/TSO1-ii 4_14293332           | 4.69 | promoter          |
| AT5G24830 | na | Tetratricopeptid 5_8529517          | 4.69 | proximal promoter |
| AT1G17730 | na | VACUOLAR PROTEIN SORTING 46.1 (VI   | 4.69 | proximal promoter |

|           |                                      |                               |      |                   |
|-----------|--------------------------------------|-------------------------------|------|-------------------|
| AT2G35600 | BREVIS RADIX-LIKE 1 (BRXL1)          | Belongs to five- 2_14945502   | 4.68 | promoter          |
| AT4G00330 | CALMODULIN-BINDING RECEPTOR-LIK      | high overall hon 4_144492     | 4.68 | five_prime_UTR    |
| AT3G52370 | FASCICLIN-LIKE ARABINOGLACTAN P      | FASCICLIN-like 3_19417233     | 4.68 | promoter          |
| AT1G65960 | GLUTAMATE DECARBOXYLASE 2 (GAD       | glutamate decar 1_24555295    | 4.68 | intron            |
| AT2G18840 | na                                   | Integral membr 2_8158157      | 4.68 | promoter          |
| AT1G15240 | na                                   | Phox-associat 1_5243357       | 4.68 | promoter          |
| AT1G77520 | na                                   | O-methyltransf 1_29130116     | 4.68 | promoter          |
| AT2G43120 | na                                   | RmlC-like cupin 2_17927216    | 4.68 | promoter          |
| AT2G17730 | NEP-INTERACTING PROTEIN 2 (NIP2)     | Intrinsic thylakoi 2_7703954  | 4.68 | five_prime_UTR    |
| AT3G53180 | NODULIN/GLUTAMINE SYNTHASE-LIKE      | Encodes a prot 3_19706855     | 4.68 | promoter          |
| AT1G20980 | SQUAMOS A PROMOTER BINDING PRO       | Encodes a nucl 1_7321365      | 4.68 | intergenic        |
| AT1G13210 | AUTOINHIBITED CA2+/ATPASE II (ACA.I) | autoinhibited Ca 1_4515265    | 4.67 | proximal promoter |
| AT3G23150 | ETHYLENE RESPONSE 2 (ETR2)           | Involved in ethy 3_8254592    | 4.67 | promoter          |
| AT2G22840 | GROWTH-REGULATING FACTOR 1 (GR       | Growth regulati 2_9728149     | 4.67 | proximal promoter |
| AT1G07090 | LIGHT SENSITIVE HYPOCOTYLS 6 (LSH    | LIGHT SENSITI 1_2176372       | 4.67 | proximal promoter |
| AT1G13220 | LITTLE NUCLEI2 (LINC2)               | Encodes a nucl 1_4515265      | 4.67 | promoter          |
| AT1G13360 | na                                   | unknown protei 1_4581071      | 4.67 | intergenic        |
| AT1G54420 | na                                   | unknown protei 1_20311715     | 4.67 | intron            |
| AT1G54410 | na                                   | dehydrin family 1_20311715    | 4.67 | proximal promoter |
| AT4G32570 | TIFY DOMAIN PROTEIN 8 (TIFY8)        | TIFY domain pr 4_15717910     | 4.67 | intron            |
| AT2G29740 | UDP-GLUCOSYL TRANSFERASE 71C2 (      | UDP-glucosyl tr 2_12707877    | 4.67 | exon              |
| AT3G19450 | (ATCAD4)                             | Encodes a cata 3_6743596      | 4.66 | proximal promoter |
| AT3G60120 | BETA GLUCOSIDASE 27 (BGLU27)         | beta glucosidas 3_22205758    | 4.66 | promoter          |
| AT2G20900 | DIACYLGLYCEROL KINASE 5 (DGK5)       | diacylglycerol ki 2_8993173   | 4.66 | promoter          |
| AT2G31230 | ETHYLENE-RESPONSIVE ELEMENT BIN      | encodes a mem 2_13309604      | 4.66 | proximal promoter |
| AT3G12970 | na                                   | unknown protei 3_4142576      | 4.66 | promoter          |
| AT1G49840 | na                                   | Protein of unkn 1_18452002    | 4.66 | promoter          |
| AT1G65870 | na                                   | Disease resist 1_24503405     | 4.66 | promoter          |
| AT1G73600 | na                                   | S-adenosyl-L-m 1_27665771     | 4.66 | intergenic        |
| AT3G23080 | na                                   | Polyketide cycl 3_8209319     | 4.66 | intron            |
| AT3G27880 | na                                   | Protein of unkn 3_10338356    | 4.66 | five_prime_UTR    |
| AT4G00085 | na                                   | pre-tRNA; tRNA 4_33940        | 4.66 | downstream        |
| AT4G00090 | na                                   | Transducin/WD 4_33940         | 4.66 | promoter          |
| AT1G16880 | ACT DOMAIN REPEATS 11 (ACR11)        | Encodes a ACT 1_5775524       | 4.65 | intron            |
| AT3G03050 | CELLULOSE SYNTHASE-LIKE D3 (CSLD     | encodes a cellu 3_686792      | 4.65 | promoter          |
| AT1G12920 | EUKARYOTIC RELEASE FACTOR 1-2 (E     | Encodes a euk 1_4398225       | 4.65 | promoter          |
| AT3G56090 | FERRITIN 3 (FER3)                    | Encodes FERR 3_20816025       | 4.65 | five_prime_UTR    |
| AT3G56085 | na                                   | pre-tRNA; tRNA 3_20816025     | 4.65 | proximal promoter |
| AT5G55830 | na                                   | Concanavalin A 5_22594454     | 4.65 | promoter          |
| AT1G50659 | na                                   | 1_18771128                    | 4.65 | five_prime_UTR    |
| AT1G50660 | na                                   | unknown protei 1_18771128     | 4.65 | five_prime_UTR    |
| AT1G48960 | na                                   | Adenine nucleoi 1_18112445    | 4.65 | promoter          |
| AT1G26208 | na                                   | Potential natura 1_9069403    | 4.65 | promoter          |
| AT3G04920 | na                                   | Ribosomal prote 3_1359844     | 4.65 | proximal promoter |
| AT3G27200 | na                                   | Cupredoxin sup 3_10043809     | 4.65 | exon              |
| AT3G62580 | na                                   | Late embryo ger 3_23146751    | 4.65 | promoter          |
| AT4G30370 | na                                   | RING/U-box suj 4_14859897     | 4.65 | promoter          |
| AT5G13181 | na                                   | This gene encod 5_4201833     | 4.65 | proximal promoter |
| AT5G58575 | na                                   | CONTAINS Inte 5_23673533      | 4.65 | promoter          |
| AT2G30520 | ROOT PHOTOTROPISM 2 (RPT2)           | light inducible rc 2_13005734 | 4.65 | promoter          |
| AT2G22970 | SERINE CARBOXYPEPTIDASE-LIKE 11      | (serine carboxyp 2_9778840    | 4.65 | intergenic        |
| AT2G22980 | SERINE CARBOXYPEPTIDASE-LIKE 13      | (serine carboxyp 2_9778840    | 4.65 | promoter          |
| AT5G56180 | ACTIN-RELATED PROTEIN 8 (ARP8)       | encodes a prote 5_22741203    | 4.64 | promoter          |
| AT1G23740 | ALKENAL/ONE OXIDOREDUCTASE (AOI      | AOR is an alker 1_8399917     | 4.64 | promoter          |
| AT5G13010 | EMBRYO DEFECTIVE 3011 (EMB3011)      | embryo defectiv 5_4121598     | 4.64 | proximal promoter |
| AT5G13000 | GLUCAN SYNTHASE-LIKE 12 (GLS12)      | encodes a gene 5_4121598      | 4.64 | promoter          |
| AT4G37420 | na                                   | Domain of unkn 4_17594419     | 4.64 | exon              |
| AT1G22430 | na                                   | GroES-like zinc 1_7920156     | 4.64 | intron            |
| AT5G56190 | na                                   | Transducin/WD 5_22741203      | 4.64 | proximal promoter |
| AT2G21172 | na                                   | Pseudogene of 2_9073264       | 4.64 | intergenic        |
| AT3G48660 | na                                   | Protein of unkn 3_18027857    | 4.64 | proximal promoter |
| AT1G76360 | na                                   | Protein kinase s 1_28648202   | 4.64 | proximal promoter |
| AT2G35710 | na                                   | Nucleotide-diph 2_15015949    | 4.64 | proximal promoter |
| AT4G17960 | na                                   | unknown protei 4_9969619      | 4.64 | proximal promoter |
| AT4G31075 | na                                   | pre-tRNA; tRNA 4_15120745     | 4.64 | downstream        |
| AT4G31080 | na                                   | Protein of unkn 4_15120745    | 4.64 | promoter          |
| AT2G35720 | ORIENTATION UNDER VERY LOW FLUE      | Encodes OWL1 2_15015949       | 4.64 | proximal promoter |
| AT2G21170 | TRIOSEPHOSPHATE ISOMERASE (TIM)      | Encodes a plasi 2_9073264     | 4.64 | promoter          |
| AT1G64780 | AMMONIUM TRANSPORTER 1;2 (AMT1;      | encodes an ami 1_24061067     | 4.63 | exon              |
| AT4G35310 | CALMODULIN-DOMAIN PROTEIN KINAS      | calmodulin-dom 4_16801874     | 4.63 | promoter          |
| AT3G17998 | CONSERVED PEPTIDE UPSTREAM OPE       | Upstream open 3_6153792       | 4.63 | proximal promoter |
| AT1G28200 | FH INTERACTING PROTEIN 1 (FIP1)      | VirF-interactin 1_9852486     | 4.63 | promoter          |
| AT2G01430 | HOMEBOX-LEUCINE ZIPPER PROTEIN       | homeobox-leuci 2_193435       | 4.63 | intergenic        |
| AT3G02550 | LOB DOMAIN-CONTAINING PROTEIN 41     | LOB domain-co 3_539488        | 4.63 | proximal promoter |
| AT2G01450 | MAP KINASE 17 (MPK17)                | member of MAF 2_202311        | 4.63 | intron            |
| AT1G07170 | na                                   | Similar to huma 1_2200027     | 4.63 | promoter          |
| AT1G61880 | na                                   | pre-tRNA; tRNA 1_22866716     | 4.63 | downstream        |
| AT2G01440 | na                                   | DEAD/DEAH bc 2_193435         | 4.63 | intergenic        |
| AT1G61890 | na                                   | MATE efflux fan 1_22866716    | 4.63 | intergenic        |
| AT3G02555 | na                                   | unknown protei 3_539488       | 4.63 | downstream        |
| AT4G10270 | na                                   | Wound-respons 4_6374600       | 4.63 | promoter          |
| AT2G46870 | NGATHA1 (NGA1)                       | NGATHA1 (NG. 2_19260886       | 4.63 | promoter          |
| AT3G59010 | PECTIN METHYLESTERASE 61 (PME61)     | pectin methyles 3_21807013    | 4.63 | proximal promoter |
| AT1G61870 | PENTATRICOPEPTIDE REPEAT 336 (PP     | pentatricopeptic 1_22866716   | 4.63 | promoter          |
| AT3G18000 | XIPOTL 1 (XPL1)                      | Arabidopsis thal 3_6153792    | 4.63 | proximal promoter |
| AT3G54020 | ARABIDOPSIS INOSITOL PHOSPHORYL      | Inositol phosph 3_20008581    | 4.62 | intergenic        |
| AT5G48810 | CYTOCHROME B5 ISOFORM D (CB5-D)      | Encodes a cytoi 5_19792178    | 4.62 | proximal promoter |
| AT1G35580 | CYTOSOLIC INVERTASE 1 (CINV1)        | CINV1 / A/N-Inv 1_13125423    | 4.62 | promoter          |
| AT5G57800 | ECERIFERUM 3 (CER3)                  | encodes a trans 5_23419192    | 4.62 | proximal promoter |
| AT5G55730 | FASCICLIN-LIKE ARABINOGLACTAN 1      | Encodes fascicl 5_22560558    | 4.62 | promoter          |
| AT5G48820 | INHIBITOR/INTERACTOR WITH CYCLIN-    | Kip-related prot 5_19792178   | 4.62 | downstream        |
| AT4G12290 | na                                   | Copper amine c 4_7305481      | 4.62 | exon              |
| AT2G33320 | na                                   | Calcium-depend 2_14122103     | 4.62 | promoter          |
| AT5G58000 | na                                   | Reticulon family 5_23476541   | 4.62 | proximal promoter |

|           |                                    |                              |      |                   |
|-----------|------------------------------------|------------------------------|------|-------------------|
| AT1G19160 | na                                 | F-box family prc 1_6614167   | 4.62 | exon              |
| AT1G55675 | na                                 | unknown proteir 1_20803670   | 4.62 | downstream        |
| AT1G55680 | na                                 | Transducin/WD 1_20803670     | 4.62 | intergenic        |
| AT1G66180 | na                                 | The gene encoc 1_24650245    | 4.62 | intergenic        |
| AT1G19150 | PHOTOSYSTEM I LIGHT HARVESTING C   | PSI type II chlor 1_6614167  | 4.62 | downstream        |
| AT1G55670 | PHOTOSYSTEM I SUBUNIT G (PSAG)     | Encodes subun 1_20803670     | 4.62 | promoter          |
| AT2G33330 | PLASMODESMATA-LOCATED PROTEIN      | Encodes a plasi 2_14122103   | 4.62 | intergenic        |
| AT5G46790 | PYR1-LIKE 1 (PYL1)                 | Encodes a merr 5_18982405    | 4.62 | intergenic        |
| AT2G40330 | PYR1-LIKE 6 (PYL6)                 | Encodes a merr 2_16846073    | 4.62 | promoter          |
| AT1G76030 | V-ATPASE B SUBUNIT 1 (VAB1)        | One of three ge 1_28533799   | 4.62 | five_prime_UTR    |
| AT3G02720 | (DJ1D)                             | Class I glutamin 3_586201    | 4.61 | promoter          |
| AT1G20440 | COLD-REGULATED 47 (COR47)          | Belongs to the c 1_7086709   | 4.61 | proximal promoter |
| AT5G09463 | CONSERVED PEPTIDE UPSTREAM OPE     | Upstream open 5_2943960      | 4.61 | three_prime_UTR   |
| AT5G09462 | CONSERVED PEPTIDE UPSTREAM OPE     | Upstream open 5_2943960      | 4.61 | three_prime_UTR   |
| AT5G09461 | CONSERVED PEPTIDE UPSTREAM OPE     | Upstream open 5_2943960      | 4.61 | three_prime_UTR   |
| AT5G15850 | CONSTANS-LIKE 1 (COL1)             | Homologous to 5_5177696      | 4.61 | five_prime_UTR    |
| AT5G15845 | na                                 | Potential natura 5_5177696   | 4.61 | five_prime_UTR    |
| AT5G15853 | na                                 | unknown proteir 5_5177696    | 4.61 | promoter          |
| AT2G02370 | na                                 | SNARE associa 2_620904       | 4.61 | promoter          |
| AT4G01090 | na                                 | Protein of unknk 4_473820    | 4.61 | promoter          |
| AT4G35610 | na                                 | zinc finger (C2H 4_16900491  | 4.61 | promoter          |
| AT5G52840 | na                                 | NADH-ubiquino 5_21412898     | 4.61 | proximal promoter |
| AT1G15280 | na                                 | CASC3/Barents 1_5252215      | 4.61 | promoter          |
| AT1G48450 | na                                 | Protein of unknk 1_17911214  | 4.61 | proximal promoter |
| AT1G48460 | na                                 | unknown proteir 1_17911214   | 4.61 | promoter          |
| AT1G63750 | na                                 | Disease resist 1_23650525    | 4.61 | promoter          |
| AT1G15270 | na                                 | Translation mac 1_5252215    | 4.61 | promoter          |
| AT3G02715 | na                                 | pre-tRNA; tRNA 3_586201      | 4.61 | downstream        |
| AT2G21300 | na                                 | ATP binding mic 2_9121353    | 4.61 | proximal promoter |
| AT3G08670 | na                                 | unknown proteir 3_2633261    | 4.61 | promoter          |
| AT4G33040 | na                                 | Thioredoxin sup 4_15939711   | 4.61 | intergenic        |
| AT5G09450 | na                                 | Tetratricopeptid 5_2943960   | 4.61 | intergenic        |
| AT5G09460 | na                                 | sequence-speci 5_2943960     | 4.61 | three_prime_UTR   |
| AT4G29390 | na                                 | Ribosomal prote 4_14466096   | 4.61 | promoter          |
| AT5G40450 | na                                 | unknown proteir 5_16195735   | 4.61 | promoter          |
| AT5G55896 | na                                 | transposable elk 5_22634136  | 4.61 | proximal promoter |
| AT5G67411 | na                                 | GRAS family tra 5_26899801   | 4.61 | proximal promoter |
| AT2G02360 | PHLOEM PROTEIN 2-B10 (PP2-B10)     | phloem protein : 2_620904    | 4.61 | promoter          |
| AT5G15860 | PRENYLCYSTEINE METHYLESTERASE      | Encodes a prote 5_5177696    | 4.61 | intergenic        |
| AT3G62440 | SECONDARY WALL THICKENING-ASSO     | Encodes an F-b 3_23097877    | 4.61 | promoter          |
| AT2G22300 | SIGNAL RESPONSIVE 1 (SR1)          | Encodes a puta 2_9471355     | 4.61 | intron            |
| AT5G52830 | WRKY DNA-BINDING PROTEIN 27 (WRK   | Encodes a WR1 5_21412898     | 4.61 | intergenic        |
| AT4G37410 | CYTOCHROME P450, FAMILY 81, SUBF   | member of CYP 4_17589095     | 4.6  | proximal promoter |
| AT3G47490 | na                                 | HNH endonucle 3_17501556     | 4.6  | intergenic        |
| AT5G19730 | na                                 | Pectin lyase-like 5_6671581  | 4.6  | intron            |
| AT5G01110 | na                                 | Tetratricopeptid 5_40975     | 4.6  | intergenic        |
| AT3G17070 | na                                 | Peroxidase fam 3_5820429     | 4.6  | proximal promoter |
| AT4G17890 | ARF-GAP DOMAIN 8 (AGD8)            | A member of AF 4_9936410     | 4.59 | proximal promoter |
| AT3G53460 | CHLOROPLAST RNA-BINDING PROTEIN    | Encodes a nucl 3_19819006    | 4.59 | downstream        |
| AT5G42900 | COLD REGULATED GENE 27 (COR27)     | cold regulated c 5_17199863  | 4.59 | promoter          |
| AT2G40880 | CYSTATIN A (CYSA)                  | Encodes a prote 2_17057326   | 4.59 | promoter          |
| AT1G13090 | CYTOCHROME P450, FAMILY 71, SUBF   | putative cytochr 1_4461718   | 4.59 | promoter          |
| AT3G04290 | LI-TOLERANT LIPASE 1 (LTL1)        | Li-tolerant lipas 3_1134211  | 4.59 | intron            |
| AT1G18835 | MINI ZINC FINGER 3 (MIF3)          | Encodes a sma1 1_6497108     | 4.59 | proximal promoter |
| AT2G40860 | na                                 | protein kinase fr 2_17057326 | 4.59 | promoter          |
| AT3G26910 | na                                 | hydroxyproline-i 3_9918850   | 4.59 | promoter          |
| AT4G18820 | na                                 | AAA-type ATPa 4_10328375     | 4.59 | proximal promoter |
| AT3G02560 | na                                 | Ribosomal prote 3_541544     | 4.59 | promoter          |
| AT3G04605 | na                                 | transposable elk 3_1246598   | 4.59 | promoter          |
| AT3G13670 | na                                 | Protein kinase fr 3_4469124  | 4.59 | promoter          |
| AT3G02555 | na                                 | unknown proteir 3_541544     | 4.59 | promoter          |
| AT3G48760 | na                                 | DHHC-type zinc 3_18074788    | 4.59 | proximal promoter |
| AT3G53990 | na                                 | Adenine nucleoi 3_19989473   | 4.59 | three_prime_UTR   |
| AT5G04390 | na                                 | C2H2-type zinc 5_1238925     | 4.59 | promoter          |
| AT5G40720 | na                                 | CONTAINS Inte 5_16299627     | 4.59 | exon              |
| AT5G39770 | na                                 | Represents a nr 5_15927934   | 4.59 | promoter          |
| AT1G08300 | NO VEIN-LIKE (NVL)                 | NO VEIN-LIKE i 1_2614523     | 4.59 | promoter          |
| AT1G06680 | PHOTOSYSTEM II SUBUNIT P-1 (PSBP-1 | Encodes a 23 k 1_2047796     | 4.59 | promoter          |
| AT1G44750 | PURINE PERMEASE 11 (PUP11)         | Member of a far 1_16892566   | 4.59 | promoter          |
| AT1G20980 | SQUAMOSA PROMOTER BINDING PRO      | Encodes a nucl 1_7324459     | 4.59 | promoter          |
| AT3G57140 | SUGAR-DEPENDENT 1-LIKE (SDP1-LIKE  | sugar-depender 3_21150642    | 4.59 | three_prime_UTR   |
| AT4G28390 | ADP/ATP CARRIER 3 (AAC3)           | Encodes a mito 4_14043385    | 4.58 | promoter          |
| AT2G23760 | BEL1-LIKE HOMEODOMAIN 4 (BLH4)     | Encodes a merr 2_10108148    | 4.58 | exon              |
| AT3G50660 | DWARF 4 (DWF4)                     | Encodes a 22& 3_18819638     | 4.58 | proximal promoter |
| AT4G03240 | FRATAXIN HOMOLOG (FH)              | Encodes AtFH, 4_1424880      | 4.58 | promoter          |
| AT1G66200 | GLUTAMINE SYNTHASE CLONE F11 (G    | encodes a cytos 1_24658463   | 4.58 | proximal promoter |
| AT1G50460 | HEXOKINASE-LIKE 1 (HKL1)           | Involved in gluc 1_18691722  | 4.58 | proximal promoter |
| AT3G01510 | LIKE SEX4 1 (LSF1)                 | Encodes a puta 3_201832      | 4.58 | promoter          |
| AT3G01513 | na                                 | unknown proteir 3_201832     | 4.58 | downstream        |
| AT2G23755 | na                                 | unknown proteir 2_10108148   | 4.58 | intergenic        |
| AT2G35260 | na                                 | unknown proteir 2_14851896   | 4.58 | three_prime_UTR   |
| AT1G09660 | na                                 | RNA-binding Kf 1_3131209     | 4.58 | promoter          |
| AT1G75960 | na                                 | AMP-dependen 1_28518862      | 4.58 | exon              |
| AT1G75970 | na                                 | pre-tRNA; tRNA 1_28518862    | 4.58 | intergenic        |
| AT4G03250 | na                                 | Homeodomain-l 4_1424880      | 4.58 | promoter          |
| AT5G27395 | na                                 | Mitochondrial in 5_9674282   | 4.58 | promoter          |
| AT5G27390 | na                                 | Mog1/PsbP/DU 5_9674282       | 4.58 | downstream        |
| AT5G55010 | na                                 | unknown proteir 5_22323484   | 4.58 | intergenic        |
| AT1G21900 | P24 SUBFAMILY DELTA 5, P24DELTA5   | Encodes an ER 1_7692525      | 4.58 | promoter          |
| AT1G08560 | SYNTAXIN OF PLANTS 111 (SYP111)    | member of SYP 1_2711148      | 4.58 | promoter          |
| AT1G46408 | AGAMOUS-LIKE 97 (AGL97)            | AGAMOUS-like 1_17235423      | 4.57 | proximal promoter |
| AT4G24080 | ALDOLASE LIKE (ALL1)               | aldolase like (Al 4_12512243 | 4.57 | exon              |
| AT1G76080 | CHLOROPLASTIC DROUGHT-INDUCED      | Encodes a thior 1_28549667   | 4.57 | promoter          |
| AT5G49330 | MYB DOMAIN PROTEIN 111 (MYB111)    | Member of the F 5_19999958   | 4.57 | intron            |

|           |                                    |                   |              |      |                   |
|-----------|------------------------------------|-------------------|--------------|------|-------------------|
| AT5G46417 | na                                 | unknown protei    | 5_18829795   | 4.57 | exon              |
| AT2G40620 | na                                 | Basic-leucine zi  | 2_16953919   | 4.57 | intergenic        |
| AT4G24090 | na                                 | unknown protei    | 4_12512243   | 4.57 | promoter          |
| AT5G49334 | na                                 | This gene enco    | 5_20005293   | 4.57 | proximal promoter |
| AT4G21865 | na                                 | unknown protei    | 4_11604474   | 4.57 | intergenic        |
| AT4G21870 | na                                 | HSP20-like chai   | 4_11604474   | 4.57 | promoter          |
| AT4G21880 | na                                 | Pentatricopeptic  | 4_11604474   | 4.57 | proximal promoter |
| AT1G35350 | na                                 | EXS (ERD1/XPI     | 1_12986647   | 4.57 | proximal promoter |
| AT1G69300 | na                                 | pre-tRNA; tRNA    | 1_26050894   | 4.57 | intergenic        |
| AT3G10470 | na                                 | C2H2-type zinc    | 3_3259729    | 4.57 | proximal promoter |
| AT2G28920 | na                                 | RING/U-box su     | 2_12419910   | 4.57 | intergenic        |
| AT2G36690 | na                                 | 2-oxoglutarate    | ( 2_15375200 | 4.57 | intergenic        |
| AT3G18815 | na                                 | pre-tRNA; tRNA    | 3_6484098    | 4.57 | promoter          |
| AT3G44190 | na                                 | FAD/NAD(P)-bi     | 3_15903601   | 4.57 | five_prime_UTR    |
| AT4G22850 | na                                 | SNARE associ      | 4_11993804   | 4.57 | promoter          |
| AT4G22840 | na                                 | Sodium Bile aci   | 4_11993804   | 4.57 | promoter          |
| AT1G06160 | OCTADECANOID-RESPONSIVE ARABID     | encodes a mem     | 1_1880812    | 4.57 | proximal promoter |
| AT1G69295 | PLASMODESMATA CALLOSE-BINDING I    | Encodes a mem     | 1_26050894   | 4.57 | intron            |
| AT3G18820 | RAB GTPASE HOMOLOG G3F (RAB7B)     | RAB GTPase h      | 3_6484098    | 4.57 | five_prime_UTR    |
| AT1G76090 | STEROL METHYLTRANSFERASE 3 (SM     | Encodes S-ade     | 1_28549667   | 4.57 | intergenic        |
| AT5G06600 | UBIQUITIN-SPECIFIC PROTEASE 12 (UE | Encodes a ubiq    | 5_2028070    | 4.57 | promoter          |
| AT5G03630 | (ATMDAR2)                          | ATMDAR2; FU       | 5_924815     | 4.56 | promoter          |
| AT2G16280 | 3-KETOACYL-COA SYNTHASE 9 (KCS9)   | Encodes KCS9      | 2_7053116    | 4.56 | downstream        |
| AT5G14250 | CONSTITUTIVE PHOTOMORPHOGENIC      | Encodes subun     | 5_4600892    | 4.56 | downstream        |
| AT3G50700 | INDETERMINATE(ID)-DOMAIN 2 (IDD2)  | zinc finger prote | 3_18839781   | 4.56 | proximal promoter |
| AT4G01090 | na                                 | Protein of unknc  | 4_470121     | 4.56 | intergenic        |
| AT1G74910 | na                                 | ADP-glucose py    | 1_28138800   | 4.56 | intron            |
| AT3G50695 | na                                 | This gene enco    | 3_18839781   | 4.56 | proximal promoter |
| AT4G17540 | na                                 | unknown protei    | 4_9775644    | 4.56 | promoter          |
| AT5G14260 | na                                 | Rubisco methyl    | 5_4600892    | 4.56 | promoter          |
| AT4G17530 | RAB GTPASE HOMOLOG 1C (RAB1C)      | AtRabD2c enco     | 4_9775644    | 4.56 | promoter          |
| AT4G01080 | TRICHOME BIREFRINGENCE-LIKE 26 (T  | Encodes a mem     | 4_470121     | 4.56 | proximal promoter |
| AT5G38880 | AUGMIN SUBUNIT 5 (AUG5)            | unknown protei    | 5_15569272   | 4.55 | promoter          |
| AT5G05980 | DHFS-FPGS HOMOLOG B (DFB)          | Encodes one of    | 5_1804607    | 4.55 | promoter          |
| AT1G47990 | GIBBERELLIN 2-OXIDASE 4 (GA2OX4)   | Encodes a gibb    | 1_17700008   | 4.55 | exon              |
| AT4G01575 | na                                 | serine protease   | 4_682860     | 4.55 | promoter          |
| AT1G79700 | na                                 | Integrase-type I  | 1_29992909   | 4.55 | intron            |
| AT4G02620 | na                                 | vacuolar ATPas    | 4_1151467    | 4.55 | promoter          |
| AT4G02630 | na                                 | Protein kinase s  | 4_1151467    | 4.55 | promoter          |
| AT4G17250 | na                                 | unknown protei    | 4_9673307    | 4.55 | exon              |
| AT4G17260 | na                                 | Lactate/malate    | ( 4_9673307  | 4.55 | proximal promoter |
| AT5G05985 | na                                 | pre-tRNA; tRNA    | 5_1804607    | 4.55 | promoter          |
| AT5G38890 | na                                 | Nucleic acid-bin  | 5_15569272   | 4.55 | promoter          |
| AT1G60800 | NSP-INTERACTING KINASE 3 (NIK3)    | NSP-interactin    | 1_22388294   | 4.55 | proximal promoter |
| AT1G06530 | PEROXISOMAL AND MITOCHONDRIAL I    | Encodes PERO      | 1_2000699    | 4.55 | proximal promoter |
| AT2G29700 | PLECKSTRIN HOMOLOGUE 1 (PH1)       | Encodes a prot    | 2_12697403   | 4.55 | promoter          |
| AT2G22010 | RELATED TO KPC1 (RKP)              | Encodes a prot    | 2_9369418    | 4.55 | intron            |
| AT2G35780 | SERINE CARBOXYPEPTIDASE-LIKE 26 (  | serine carboxyp   | 2_15040212   | 4.55 | promoter          |
| AT2G42200 | SQUAMOSA PROMOTER BINDING PRO      | Encodes a puta    | 2_17585665   | 4.55 | proximal promoter |
| AT2G34070 | TRICHOME BIREFRINGENCE-LIKE 37 (T  | Encodes a mem     | 2_14388739   | 4.55 | intron            |
| AT2G27040 | ARGONAUTE 4 (AGO4)                 | AGO4 is a mem     | 2_11542464   | 4.54 | promoter          |
| AT3G26300 | CYTOCHROME P450, FAMILY 71, SUBF   | putative cytochr  | 3_9641089    | 4.54 | promoter          |
| AT3G26310 | CYTOCHROME P450, FAMILY 71, SUBF   | putative cytochr  | 3_9641089    | 4.54 | intron            |
| AT3G04110 | GLUTAMATE RECEPTOR 1.1 (GLR1.1)    | putative glutam   | 3_1077194    | 4.54 | promoter          |
| AT2G16260 | GLYCINE-RICH RNA-BINDING PROTEIN   | pseudogene of     | _2_7044737   | 4.54 | promoter          |
| AT4G21320 | HEAT-STRESS-ASSOCIATED 32 (HSA32   | Encodes heat-s    | 4_11340271   | 4.54 | promoter          |
| AT4G16480 | INOSITOL TRANSPORTER 4 (INT4)      | Encodes a high    | 4_9293410    | 4.54 | downstream        |
| AT2G22510 | na                                 | hydroxyproline-   | 2_9568548    | 4.54 | intergenic        |
| AT1G66760 | na                                 | MATE efflux fan   | 1_24901960   | 4.54 | promoter          |
| AT4G39420 | na                                 | unknown protei    | 4_18355477   | 4.54 | intergenic        |
| AT4G32190 | na                                 | Myosin heavy c    | 4_15544653   | 4.54 | promoter          |
| AT5G63620 | na                                 | GroES-like zinc   | 5_25468386   | 4.54 | five_prime_UTR    |
| AT1G06475 | na                                 | unknown protei    | 1_1974526    | 4.54 | promoter          |
| AT1G56670 | na                                 | GDSL-like Lipas   | 1_21242096   | 4.54 | intron            |
| AT1G64540 | na                                 | F-box/FBD-like    | 1_23963424   | 4.54 | intergenic        |
| AT3G25030 | na                                 | RING/U-box su     | 3_9122050    | 4.54 | promoter          |
| AT4G16490 | na                                 | ARM repeat su     | 4_9293410    | 4.54 | downstream        |
| AT5G41400 | na                                 | RING/U-box su     | 5_16569022   | 4.54 | intergenic        |
| AT3G29370 | P1R3 (P1R3)                        | Encodes a atyp    | 3_11276832   | 4.54 | proximal promoter |
| AT1G28340 | RECEPTOR LIKE PROTEIN 4 (RLP4)     | receptor like prc | 1_9939986    | 4.54 | promoter          |
| AT4G39460 | S-ADENOSYLMETHIONINE CARRIER 1 (   | Encodes a plasi   | 4_18355477   | 4.54 | intergenic        |
| AT3G48000 | ALDEHYDE DEHYDROGENASE 2B4 (AL     | Encodes a puta    | 3_17720062   | 4.53 | promoter          |
| AT5G57630 | CBL-INTERACTING PROTEIN KINASE 21  | CBL-interactin    | 5_23340676   | 4.53 | downstream        |
| AT2G32720 | CYTOCHROME B5 ISOFORM B (CB5-B)    | member of Cyto    | 2_13878799   | 4.53 | promoter          |
| AT3G24615 | na                                 | Encodes a Z43     | 3_8979867    | 4.53 | promoter          |
| AT3G13740 | na                                 | Ribonuclease III  | 3_4504165    | 4.53 | promoter          |
| AT3G51210 | na                                 | P-loop containir  | 3_19020214   | 4.53 | proximal promoter |
| AT2G33840 | na                                 | Tyrosyl-tRNA s    | 2_14314855   | 4.53 | promoter          |
| AT1G10650 | na                                 | SBP (S-ribonuci   | 1_3522914    | 4.53 | intergenic        |
| AT3G61763 | na                                 | This gene enco    | 3_22864392   | 4.53 | promoter          |
| AT4G13180 | na                                 | NAD(P)-binding    | 4_7658277    | 4.53 | promoter          |
| AT5G18490 | na                                 | Plant protein of  | 5_6136794    | 4.53 | promoter          |
| AT5G67390 | na                                 | unknown protei    | 5_26887416   | 4.53 | intergenic        |
| AT1G69640 | SPHINGOID BASE HYDROXYLASE 1 (SE   | Encodes one of    | 1_26195774   | 4.53 | promoter          |
| AT4G21540 | SPHINGOSINE KINASE 1 (SPHK1)       | Encodes a sphii   | 4_11462852   | 4.53 | intergenic        |
| AT4G21550 | VP1/ABI3-LIKE 3 (VAL3)             | VP1/ABI3-like     | 3_4_11462852 | 4.53 | promoter          |
| AT1G17290 | ALANINE AMINOTRANSFERAS (AlaAT1)   | Encodes for ala   | 1_5922654    | 4.52 | five_prime_UTR    |
| AT1G30330 | AUXIN RESPONSE FACTOR 6 (ARF6)     | Encodes a mem     | 1_10690905   | 4.52 | promoter          |
| AT4G33790 | ECERIFERUM 4 (CER4)                | Encodes an alci   | 4_16205149   | 4.52 | exon              |
| AT2G36460 | FRUCTOSE-BISPHOSPHATE ALDOLASE     | Aldolase superf.  | 2_15298580   | 4.52 | promoter          |
| AT5G58870 | FTSH PROTEASE 9 (ftsh9)            | encodes an Ftsi   | 5_23773965   | 4.52 | promoter          |
| AT2G19620 | N-MYC DOWNREGULATED-LIKE 3 (NDL    | N-MYC downreg     | 2_8488804    | 4.52 | promoter          |
| AT2G42470 | na                                 | TRAF-like famil   | 2_17686795   | 4.52 | proximal promoter |
| AT2G42480 | na                                 | TRAF-like famil   | 2_17686795   | 4.52 | exon              |

|           |                                   |                              |      |                   |
|-----------|-----------------------------------|------------------------------|------|-------------------|
| AT3G62120 | na                                | Class II aaRS a 3_23004411   | 4.52 | promoter          |
| AT4G33780 | na                                | FUNCTIONS IN 4_16205149      | 4.52 | proximal promoter |
| AT5G13810 | na                                | Glutaredoxin far 5_4457875   | 4.52 | intergenic        |
| AT3G15040 | na                                | Protein of unknk 3_5064898   | 4.52 | three_prime_UTR   |
| AT2G36470 | na                                | Plant protein of 2_15298580  | 4.52 | intergenic        |
| AT2G36950 | na                                | Heavy metal tra 2_15515040   | 4.52 | promoter          |
| AT4G02760 | na                                | RNI-like superfa 4_1230146   | 4.52 | proximal promoter |
| AT4G06744 | na                                | Leucine-rich ref 4_4070275   | 4.52 | intergenic        |
| AT4G39530 | na                                | Tetratricopeptid 4_18377386  | 4.52 | promoter          |
| AT4G39830 | na                                | Cupredoxin sup 4_18480937    | 4.52 | exon              |
| AT5G07090 | na                                | Ribosomal prote 5_2204149    | 4.52 | downstream        |
| AT4G02770 | PHOTOSYSTEM I SUBUNIT D-1 (PSAD-1 | Encodes a prote 4_1230146    | 4.52 | promoter          |
| AT3G15030 | TCP FAMILY TRANSCRIPTION FACTOR   | Arabidopsis tha 3_5064898    | 4.52 | intergenic        |
| AT4G39770 | TREHALOSE-6-PHOSPHATE PHOSPHA     | Haloacid dehalc 4_18451511   | 4.52 | promoter          |
| AT5G07100 | WRKY DNA-BINDING PROTEIN 26 (WRK  | Encodes WRKY 5_2204149       | 4.52 | promoter          |
| AT4G28720 | YUCCA 8 (YUC8)                    | Auxin biosynthe 4_14192099   | 4.52 | promoter          |
| AT5G09870 | CELLULOSE SYNTHASE 5 (CESA5)      | Encodes a cellu 5_3072187    | 4.51 | proximal promoter |
| AT1G01160 | GRF1-INTERACTING FACTOR 2 (GIF2)  | Arabidopsis tha 1_75467      | 4.51 | intergenic        |
| AT5G17350 | na                                | unknown proteir 5_5719001    | 4.51 | exon              |
| AT1G34010 | na                                | unknown proteir 1_12359023   | 4.51 | intergenic        |
| AT2G18070 | na                                | unknown proteir 2_7851637    | 4.51 | proximal promoter |
| AT4G24780 | na                                | Pectin lyase-like 4_12774413 | 4.51 | proximal promoter |
| AT1G01170 | na                                | Protein of unknk 1_75467     | 4.51 | proximal promoter |
| AT1G01180 | na                                | S-adenosyl-L-m 1_75467       | 4.51 | promoter          |
| AT1G53233 | na                                | Potential natura 1_19851770  | 4.51 | exon              |
| AT4G01460 | na                                | basic helix-loop 4_619789    | 4.51 | proximal promoter |
| AT5G15810 | na                                | N2,N2-dimethyl 5_5157730     | 4.51 | promoter          |
| AT5G51770 | na                                | Protein kinase s 5_21030918  | 4.51 | promoter          |
| AT5G15805 | na                                | pre-tRNA; tRNA 5_5157730     | 4.51 | downstream        |
| AT3G24220 | NINE-CIS-EPOXYCAROTENOID DIOXYG   | A member of qe 3_8762354     | 4.51 | exon              |
| AT1G34000 | ONE-HELIX PROTEIN 2 (OHP2)        | Encodes a nove 1_12359023    | 4.51 | promoter          |
| AT1G53230 | TEOSINTE BRANCHED 1, CYCLOIDEA A  | Encodes a merr 1_19851770    | 4.51 | promoter          |
| AT5G12250 | BETA-6 TUBULIN (TUB6)             | Encodes a beta 5_3963666     | 4.5  | promoter          |
| AT3G07330 | CELLULOSE-SYNTHASE-LIKE C6 (CSLC  | encodes a gene 3_2334885     | 4.5  | intergenic        |
| AT1G29920 | CHLOROPHYLL A/B-BINDING PROTEIN   | Encodes lhcb1. 1_10476110    | 4.5  | promoter          |
| AT2G33800 | EMBRYO DEFECTIVE 3113 (EMB3113)   | Ribosomal prote 2_14302967   | 4.5  | proximal promoter |
| AT2G21060 | GLYCINE-RICH PROTEIN 2B (GRP2B)   | Glycine-rich pro 2_9038361   | 4.5  | proximal promoter |
| AT2G21050 | LIKE AUXIN RESISTANT 2 (LAX2)     | Encodes LAX2 2_9038361       | 4.5  | intergenic        |
| AT3G52880 | MONODEHYDROASCORBATE REDUCT       | Encodes a pero 3_19604618    | 4.5  | promoter          |
| AT1G07650 | na                                | Leucine-rich ref 1_2365676   | 4.5  | intron            |
| AT3G07320 | na                                | O-Glycosyl hydr 3_2334885    | 4.5  | proximal promoter |
| AT3G52960 | na                                | Thioredoxin sup 3_19639538   | 4.5  | promoter          |
| AT4G18280 | na                                | glycine-rich cell 4_10103336 | 4.5  | proximal promoter |
| AT5G06440 | na                                | FUNCTIONS IN 5_1967289       | 4.5  | five_prime_UTR    |
| AT5G51845 | na                                | Encodes a defe 5_21075991    | 4.5  | proximal promoter |
| AT1G69850 | NITRATE TRANSPORTER 1.2 (NRT1.2)  | Encodes an ind 1_26300503    | 4.5  | promoter          |
| AT2G33810 | SQUAMOSIA PROMOTER BINDING PRO    | Encodes a merr 2_14302967    | 4.5  | proximal promoter |
| AT1G32200 | (ATS1)                            | Encodes a chlci 1_11601408   | 4.49 | intergenic        |
| AT5G06250 | DEVELOPMENT-RELATED PCG TARGE     | AP2/B3-like trar 5_1892144   | 4.49 | intergenic        |
| AT1G05190 | EMBRYO DEFECTIVE 2394 (emb2394)   | embryo defectiv 1_1504790    | 4.49 | proximal promoter |
| AT1G05200 | GLUTAMATE RECEPTOR 3.4 (GLR3.4)   | Encodes a puta 1_1504790     | 4.49 | promoter          |
| AT1G68460 | ISOPENTENYLTRANSFERASE 1 (IPT1)   | Encodes a puta 1_25669025    | 4.49 | exon              |
| AT1G78560 | na                                | Sodium Bile aci 1_29548886   | 4.49 | promoter          |
| AT1G60783 | na                                | unknown proteir 1_22374103   | 4.49 | proximal promoter |
| AT1G08845 | na                                | Ribosomal L18r 1_2839005     | 4.49 | intron            |
| AT1G56500 | na                                | haloacid dehalo 1_21167514   | 4.49 | downstream        |
| AT1G68780 | na                                | RNI-like superfa 1_25834471  | 4.49 | proximal promoter |
| AT2G16380 | na                                | Sec14p-like phc 2_7085663    | 4.49 | promoter          |
| AT4G20170 | na                                | Domain of unkn 4_10899278    | 4.49 | downstream        |
| AT4G20180 | na                                | transposable elk 4_10899278  | 4.49 | proximal promoter |
| AT5G18770 | na                                | F-box/FBD-like 5_6261163     | 4.49 | promoter          |
| AT1G78570 | RHAMNOSE BIOSYNTHESIS 1 (RHM1)    | Encodes a UDF 1_29548886     | 4.49 | proximal promoter |
| AT3G23820 | UDP-D-GLUCURONATE 4-EPIMERASE     | UDP-D-glucuroi 3_8602190     | 4.49 | proximal promoter |
| AT1G56510 | WHITE RUST RESISTANCE 4 (WRR4)    | TIR-NB-LRR pri 1_21167514    | 4.49 | promoter          |
| AT1G54990 | AUXIN RESISTANT 4 (AXR4)          | auxin response 1_20511159    | 4.48 | promoter          |
| AT5G66680 | DEFECTIVE GLYCOSYLATION (DGL1)    | Encodes a prote 5_26620679   | 4.48 | promoter          |
| AT5G02260 | EXPANSIN A9 (EXPA9)               | member of Alph 5_465565      | 4.48 | intergenic        |
| AT5G25220 | KNOTTED1-LIKE HOMEBOX GENE 3 (I   | A member of cie 5_8735009    | 4.48 | proximal promoter |
| AT5G48945 | LOW-MOLECULAR-WEIGHT CYSTEINE-    | Encodes a merr 5_19843962    | 4.48 | proximal promoter |
| AT3G04765 | MICRORNA167C (MIR167C)            | Encodes a micr 3_1307608     | 4.48 | proximal promoter |
| AT5G59780 | MYB DOMAIN PROTEIN 59 (MYB59)     | Encodes a puta 5_24084882    | 4.48 | proximal promoter |
| AT5G52815 | na                                | pre-tRNA; tRNA 5_21401212    | 4.48 | exon              |
| AT5G52820 | na                                | WD-40 repeat fi 5_21401212   | 4.48 | promoter          |
| AT4G29270 | na                                | HAD superfamil 4_14424963    | 4.48 | promoter          |
| AT2G33320 | na                                | Calcium-depend 2_14119638    | 4.48 | exon              |
| AT3G44640 | na                                | transposable elk 3_16204255  | 4.48 | intergenic        |
| AT1G08610 | na                                | Pentatricopeptic 1_2735905   | 4.48 | promoter          |
| AT1G54985 | na                                | pseudogene, hy 1_20511159    | 4.48 | intron            |
| AT1G23000 | na                                | Heavy metal tra 1_8141177    | 4.48 | proximal promoter |
| AT1G72510 | na                                | Protein of unknk 1_27303326  | 4.48 | promoter          |
| AT3G42170 | na                                | transposase-like 3_14321657  | 4.48 | intron            |
| AT3G55470 | na                                | Calcium-depend 3_20564144    | 4.48 | promoter          |
| AT4G02880 | na                                | unknown proteir 4_1274387    | 4.48 | promoter          |
| AT4G28570 | na                                | Long-chain fatty 4_14119465  | 4.48 | five_prime_UTR    |
| AT5G20700 | na                                | Protein of unknk 5_7005379   | 4.48 | intergenic        |
| AT5G50450 | na                                | HCP-like superf 5_20547009   | 4.48 | proximal promoter |
| AT5G21950 | na                                | alpha/beta-Hydr 5_7256745    | 4.48 | proximal promoter |
| AT1G77740 | PHOSPHATIDYLINOSITOL-4-PHOSPHA    | Encodes PIP5K 1_29217927     | 4.48 | proximal promoter |
| AT5G65270 | RAB GTPASE HOMOLOG A4a (RABA4a)   | RAB GTPase hr 5_26083198     | 4.48 | promoter          |
| AT1G78000 | SULFATE TRANSPORTER 1.2 (SULTR1;  | Encodes a sulfa 1_29327688   | 4.48 | proximal promoter |
| AT5G02260 | EXPANSIN A9 (EXPA9)               | member of Alph 5_462591      | 4.47 | proximal promoter |
| AT1G70790 | na                                | Calcium-depend 1_26699438    | 4.47 | proximal promoter |
| AT3G21690 | na                                | MATE efflux fan 3_7637767    | 4.47 | proximal promoter |
| AT4G10980 | na                                | transposable elk 4_6723206   | 4.47 | proximal promoter |

|           |                                      |                   |              |      |                   |
|-----------|--------------------------------------|-------------------|--------------|------|-------------------|
| AT5G08060 | na                                   | unknown protei    | 5_2580373    | 4.47 | promoter          |
| AT1G72830 | NUCLEAR FACTOR Y, SUBUNIT A3 (NF-    | Encodes a sub     | 1_27408603   | 4.47 | proximal promoter |
| AT1G80300 | NUCLEOTIDE TRANSPORTER 1 (NTT1)      | Encodes an AT1    | 1_30191681   | 4.47 | promoter          |
| AT1G02130 | RAS 5 (RA-5)                         | Belongs to the F  | 1_401218     | 4.47 | exon              |
| AT5G26920 | CAM-BINDING PROTEIN 60-LIKE G (CBF   | Encodes a calrn   | 5_9476205    | 4.46 | intron            |
| AT3G14450 | CTC-INTERACTING DOMAIN 9 (CID9)      | RNA-binding pri   | 3_4846159    | 4.46 | intergenic        |
| AT4G34200 | EMBRYO SAC DEVELOPMENT ARREST        | embryo sac dev    | 4_16373692   | 4.46 | downstream        |
| AT3G27260 | GLOBAL TRANSCRIPTION FACTOR GR1      | Kinase like prot  | 3_10067560   | 4.46 | intron            |
| AT4G00830 | LHP1-INTERACTING FACTOR 2 (LIF2)     | RNA-binding (R    | 4_351922     | 4.46 | promoter          |
| AT1G11310 | MILDEW RESISTANCE LOCUS O 2 (MLC     | A member of a l   | 1_3804211    | 4.46 | promoter          |
| AT2G22426 | na                                   | unknown protei    | 2_9520891    | 4.46 | intergenic        |
| AT3G50625 | na                                   | transposable elk  | 3_18790412   | 4.46 | proximal promoter |
| AT1G79720 | na                                   | Eukaryotic aspa   | 1_29999991   | 4.46 | proximal promoter |
| AT4G39550 | na                                   | Galactose oxid    | 4_18382063   | 4.46 | promoter          |
| AT4G11680 | na                                   | Zinc finger, C3F  | 4_7053221    | 4.46 | downstream        |
| AT4G11670 | na                                   | FUNCTIONS IN      | 4_7053221    | 4.46 | promoter          |
| AT1G04770 | na                                   | Tetratricopeptid  | 1_1338028    | 4.46 | promoter          |
| AT1G29650 | na                                   | transposable elk  | 1_10363575   | 4.46 | intergenic        |
| AT2G40110 | na                                   | Yippee family p   | 2_16749857   | 4.46 | intergenic        |
| AT2G40113 | na                                   | Pollen Ole e 1    | a_2_16749857 | 4.46 | promoter          |
| AT3G13432 | na                                   | unknown protei    | 3_4372689    | 4.46 | intergenic        |
| AT5G22000 | RING-H2 GROUP F2A (RHF2A)            | encodes a RINC    | 5_7277198    | 4.46 | five_prime_UTR    |
| AT4G34190 | STRESS ENHANCED PROTEIN 11 (SEP1)    | Encodes a stres   | 4_16373692   | 4.46 | promoter          |
| AT3G60600 | VAMP/SYNAPTOBREVIN-ASSOCIATED I      | Encodes VAP2;     | 3_22400361   | 4.46 | promoter          |
| AT3G27020 | YELLOW STRIPE LIKE 6 (YSL6)          | Arabidopsis tha   | 3_9964784    | 4.46 | promoter          |
| AT1G66600 | ABA OVERLY SENSITIVE MUTANT 3 (AB    | A member of W     | 1_24848014   | 4.45 | promoter          |
| AT1G17190 | GLUTATHIONE S-TRANSFERASE TAU 2      | Encodes glutat    | 1_5876512    | 4.45 | three_prime_UTR   |
| AT4G38600 | KAKTUS (KAK)                         | encodes a mem     | 4_18049888   | 4.45 | proximal promoter |
| AT3G50870 | MONOPOLE (MNP)                       | Encodes a GAT     | 3_18909953   | 4.45 | proximal promoter |
| AT3G54500 | na                                   | FUNCTIONS IN      | 3_20179110   | 4.45 | promoter          |
| AT3G56275 | na                                   | pseudogene of     | 3_20872515   | 4.45 | promoter          |
| AT2G22280 | na                                   | pre-tRNA; tRNA    | 2_9466283    | 4.45 | proximal promoter |
| AT1G17620 | na                                   | Late embryoger    | 1_6061348    | 4.45 | proximal promoter |
| AT1G31940 | na                                   | unknown protei    | 1_11472655   | 4.45 | proximal promoter |
| AT5G20950 | na                                   | Glycosyl hydrok   | 5_7111840    | 4.45 | promoter          |
| AT1G50160 | na                                   | BEST Arabidop:    | 1_18581887   | 4.45 | intergenic        |
| AT3G07260 | na                                   | SMAD/FHA don      | 3_2309495    | 4.45 | promoter          |
| AT4G34140 | na                                   | D111/G-patch      | c_4_16350216 | 4.45 | proximal promoter |
| AT2G22290 | RAB GTPASE HOMOLOG H1D (RABH1d       | RAB GTPase hr     | 2_9466283    | 4.45 | promoter          |
| AT1G50170 | SIROHYDROCHLORIN FERROCHELATA        | encodes sirohyc   | 1_18581887   | 4.45 | promoter          |
| AT2G18700 | TREHALOSE PHOSPHATASE/SYNTHAS        | Encodes an enz    | 2_8108736    | 4.45 | promoter          |
| AT4G00730 | ANTHOCYANINLESS 2 (ANL2)             | Encodes a hom     | 4_305317     | 4.44 | proximal promoter |
| AT1G06850 | BASIC LEUCINE-ZIPPER 52 (bZIP52)     | basic leucine-zip | 1_2104996    | 4.44 | promoter          |
| AT1G50430 | DWARF 5 (DWF5)                       | Mutants are def   | 1_18685677   | 4.44 | promoter          |
| AT5G54110 | MEMBRANE-ASSOCIATED MANNITOL-II      | Encodes a high    | 5_21958197   | 4.44 | promoter          |
| AT1G50440 | na                                   | RING/FYVE/PH      | 1_18685677   | 4.44 | promoter          |
| AT5G67020 | na                                   | unknown protei    | 5_26750983   | 4.44 | exon              |
| AT1G21326 | na                                   | VQ motif-contai   | n_1_7470405  | 4.44 | proximal promoter |
| AT1G23980 | na                                   | RING/U-box su     | 1_8487315    | 4.44 | proximal promoter |
| AT1G68660 | na                                   | Ribosomal prote   | 1_25779324   | 4.44 | promoter          |
| AT2G16365 | na                                   | F-box family pr   | c_2_7074071  | 4.44 | promoter          |
| AT3G10190 | na                                   | Calcium-binding   | c_3_3155284  | 4.44 | promoter          |
| AT3G61900 | na                                   | SAUR-like auxi    | r_3_22927985 | 4.44 | intergenic        |
| AT5G47225 | na                                   | transposable elk  | 5_19176775   | 4.44 | intergenic        |
| AT2G41310 | RESPONSE REGULATOR 3 (RR3)           | Encodes an A-     | 12_17221261  | 4.44 | proximal promoter |
| AT1G32790 | CTC-INTERACTING DOMAIN 11 (CID11)    | RNA-binding pri   | 1_11874688   | 4.43 | downstream        |
| AT3G01120 | METHIONINE OVERACCUMULATION 1 (      | encodes a cyst    | 3_42636      | 4.43 | proximal promoter |
| AT1G72645 | na                                   | unknown protei    | 1_27349344   | 4.43 | downstream        |
| AT5G05330 | na                                   | Encodes a prot    | 5_1578802    | 4.43 | promoter          |
| AT1G74470 | na                                   | Encodes for a     | n_1_27991058 | 4.43 | promoter          |
| AT2G15300 | na                                   | Leucine-rich re   | p_2_6651571  | 4.43 | exon              |
| AT2G15830 | na                                   | unknown protei    | 2_6894787    | 4.43 | intergenic        |
| AT1G32780 | na                                   | GroES-like zinc   | 1_11874688   | 4.43 | proximal promoter |
| AT3G49000 | na                                   | RNA polymeras     | 3_18162543   | 4.43 | promoter          |
| AT4G18740 | na                                   | Rho termination   | 4_10304669   | 4.43 | promoter          |
| AT5G14495 | na                                   | pre-tRNA; tRNA    | 5_4673109    | 4.43 | proximal promoter |
| AT5G59500 | na                                   | protein C-termi   | r_5_23985808 | 4.43 | promoter          |
| AT1G18800 | NAP1-RELATED PROTEIN 2 (NRP2)        | Double nrp1-1     | r_1_6484352  | 4.43 | proximal promoter |
| AT5G05340 | PEROXIDASE 52 (PRX52)                | Peroxidase sup    | 5_1578802    | 4.43 | downstream        |
| AT4G27970 | SLAC1 HOMOLOGUE 2 (SLAH2)            | Encodes a prot    | 4_13920700   | 4.43 | proximal promoter |
| AT1G72650 | TRF-LIKE 6 (TRFL6)                   | Arabidopsis tha   | 1_27349344   | 4.43 | promoter          |
| AT5G09860 | (THO1)                               | Encodes a com     | 5_3065845    | 4.42 | proximal promoter |
| AT5G47760 | 2-PHOSPHOGLYCOLATE PHOSPHATAS        | serine/threonine  | 5_19345193   | 4.42 | promoter          |
| AT5G47770 | FARNESYL DIPHOSPHATE SYNTHASE        | Encodes a prot    | 5_19345193   | 4.42 | five_prime_UTR    |
| AT4G18010 | INOSITOL(1,4,5)P3 5-PHOSPHATASE II ( | Encodes an ino    | 4_9994426    | 4.42 | promoter          |
| AT2G05160 | na                                   | CCCH-type zinc    | 2_1862236    | 4.42 | promoter          |
| AT5G65520 | na                                   | Tetratricopeptid  | 5_26189905   | 4.42 | exon              |
| AT3G09410 | na                                   | Pectinacetylest   | 3_2901172    | 4.42 | promoter          |
| AT3G09430 | na                                   | unknown protei    | 3_2901172    | 4.42 | promoter          |
| AT3G11395 | na                                   | pre-tRNA; tRNA    | 3_3575936    | 4.42 | downstream        |
| AT3G11402 | na                                   | Cysteine/Histidi  | 3_3575936    | 4.42 | intron            |
| AT3G51700 | na                                   | PIF1 helicase;    | c_3_19181819 | 4.42 | proximal promoter |
| AT4G24780 | na                                   | Pectin lyase-like | 4_12769657   | 4.42 | intergenic        |
| AT5G09850 | na                                   | Transcription eli | 5_3065845    | 4.42 | five_prime_UTR    |
| AT2G40180 | PHOSPHATASE 2C5 (PP2C5)              | Encodes PP2C:     | 2_16782241   | 4.42 | promoter          |
| AT3G15030 | TCP FAMILY TRANSCRIPTION FACTOR      | Arabidopsis tha   | 3_5061913    | 4.42 | intron            |
| AT1G65520 | DELTA(3), DELTA(2)-ENOYL COA ISOM    | encodes a pero    | 1_24361281   | 4.41 | exon              |
| AT3G48670 | INVOLVED IN DE NOVO 2 (IDN2)         | Encodes IDN2 (    | 3_18030379   | 4.41 | promoter          |
| AT4G33490 | na                                   | Eukaryotic aspa   | 4_16110741   | 4.41 | three_prime_UTR   |
| AT2G33175 | na                                   | unknown protei    | 2_14061874   | 4.41 | intergenic        |
| AT3G05425 | na                                   | unknown protei    | 3_1567523    | 4.41 | exon              |
| AT3G05430 | na                                   | Tudor/PWWP/N      | 3_1567523    | 4.41 | promoter          |
| AT3G48660 | na                                   | Protein of unkn   | c_3_18030379 | 4.41 | intergenic        |
| AT3G62570 | na                                   | Tetratricopeptid  | 3_23140764   | 4.41 | proximal promoter |



|           |                                      |                              |           |      |                   |
|-----------|--------------------------------------|------------------------------|-----------|------|-------------------|
| AT5G14470 | na                                   | GHMP kinase fr               | 5_4664788 | 4.41 | promoter          |
| AT2G32960 | PLANT AND FUNGI ATYPICAL DUAL-SPI    | Encodes an aty2_13989292     |           | 4.41 | intron            |
| AT4G33495 | ROOT PRIMORDIUM DEFECTIVE 1 (RPF1)   | A member of the r4_16110741  |           | 4.41 | three_prime_UTR   |
| AT5G61780 | TUDOR-SN PROTEIN 2 (TUDOR2)          | Involved in the r5_24820561  |           | 4.41 | proximal promoter |
| AT2G34960 | CATIONIC AMINO ACID TRANSPORTER      | Encodes a merr 2_14746130    |           | 4.4  | promoter          |
| AT5G65710 | HAESA-LIKE 2 (HLS2)                  | HAESA-like 2 (f 5_26294344   |           | 4.4  | exon              |
| AT3G21720 | ISOCITRATE LYASE (ICL)               | Encodes a glyo: 3_7657866    |           | 4.4  | proximal promoter |
| AT1G19530 | na                                   | unknown protei 1_6763215     |           | 4.4  | proximal promoter |
| AT1G75210 | na                                   | HAD-superfamil 1_28223791    |           | 4.4  | promoter          |
| AT1G75200 | na                                   | flavodoxin famil 1_28223791  |           | 4.4  | promoter          |
| AT5G55896 | na                                   | transposable elk 5_22627274  |           | 4.4  | intergenic        |
| AT5G55893 | na                                   | unknown protei 5_22627274    |           | 4.4  | proximal promoter |
| AT3G07440 | na                                   | unknown protei 3_2381186     |           | 4.4  | promoter          |
| AT4G31136 | na                                   | This gene encoi 4_15140613   |           | 4.4  | downstream        |
| AT4G33940 | na                                   | RING/U-box sui 4_16265982    |           | 4.4  | promoter          |
| AT5G25820 | na                                   | Exostosin famil 5_8994727    |           | 4.4  | intergenic        |
| AT5G66550 | na                                   | Maf-like protein; 5_26561919 |           | 4.4  | proximal promoter |
| AT5G65720 | NITROGEN FIXATION S (NIFS)-LIKE 1 (N | Encodes a cystr 5_26294344   |           | 4.4  | proximal promoter |
| AT5G22370 | QUATRE-QUART 1 (QQT1)                | Encodes QQT1 5_7405923       |           | 4.4  | promoter          |
| AT3G27010 | TEOSINTE BRANCHED 1, CYCLOIDEA, I    | Belongs to a TC 3_9959857    |           | 4.4  | proximal promoter |
| AT5G22360 | VESICLE-ASSOCIATED MEMBRANE PR       | Member of Syn: 5_7405923     |           | 4.4  | promoter          |
| AT5G04340 | ZINC FINGER OF ARABIDOPSIS THALIA    | putative c2h2 zi 5_1217414   |           | 4.4  | promoter          |
| AT2G43130 | (ARA4)                               | encodes a prote 2_17933170   |           | 4.39 | proximal promoter |
| AT2G02010 | GLUTAMATE DECARBOXYLASE 4 (GAD       | glutamate decar 2_477709     |           | 4.39 | proximal promoter |
| AT3G07770 | HEAT SHOCK PROTEIN 89.1 (Hsp89.1)    | HEAT SHOCK I 3_2484402       |           | 4.39 | downstream        |
| AT2G01480 | na                                   | O-fucosyltransf 2_221114     |           | 4.39 | downstream        |
| AT5G60190 | na                                   | Encodes a prote 5_24237156   |           | 4.39 | intergenic        |
| AT2G29995 | na                                   | unknown protei 2_12798995    |           | 4.39 | intron            |
| AT2G43140 | na                                   | basic helix-loop 2_17933170  |           | 4.39 | intron            |
| AT1G70550 | na                                   | Protein of Unkn 1_26600421   |           | 4.39 | downstream        |
| AT3G21300 | na                                   | RNA methyltran 3_7496435     |           | 4.39 | promoter          |
| AT5G02680 | na                                   | LOCATED IN: e 5_604790       |           | 4.39 | promoter          |
| AT5G02540 | na                                   | NAD(P)-binding 5_569357      |           | 4.39 | intron            |
| AT5G58120 | na                                   | Disease resistai 5_23517135  |           | 4.39 | promoter          |
| AT5G65820 | na                                   | Pentatricopeptic 5_26341956  |           | 4.39 | promoter          |
| AT3G07780 | OBERON1 (OBE1)                       | Encodes a nucl 3_2484402     |           | 4.39 | promoter          |
| AT2G01490 | PHYTANOYL-COA 2-HYDROXYLASE (P       | Encodes a phyt 2_221114      |           | 4.39 | promoter          |
| AT5G65830 | RECEPTOR LIKE PROTEIN 57 (RLP57)     | receptor like prc 5_26341956 |           | 4.39 | downstream        |
| AT1G78770 | ANAPHASE PROMOTING COMPLEX 6 (A      | anaphase prom 1_29617131     |           | 4.38 | five_prime_UTR    |
| AT3G10912 | CONSERVED PEPTIDE UPSTREAM OPE       | Upstream open 3_3413851      |           | 4.38 | five_prime_UTR    |
| AT3G51240 | FLAVANONE 3-HYDROXYLASE (F3H)        | Encodes flavan 3_19024977    |           | 4.38 | promoter          |
| AT5G47820 | FRAGILE FIBER 1 (FRA1)               | encodes a kines 5_19366261   |           | 4.38 | promoter          |
| AT4G21440 | MYB-LIKE 102 (MYB102)                | Encodes a MYE 4_11420937     |           | 4.38 | proximal promoter |
| AT4G14980 | na                                   | Cysteine/Histidi 4_8565433   |           | 4.38 | proximal promoter |
| AT4G14990 | na                                   | Topoisomerase 4_8565433      |           | 4.38 | downstream        |
| AT1G26730 | na                                   | EXS (ERD1/XP1 1_9241039      |           | 4.38 | promoter          |
| AT3G51230 | na                                   | BEST Arabidop: 3_19024977    |           | 4.38 | proximal promoter |
| AT4G17940 | na                                   | Tetratricopeptid 4_9965612   |           | 4.38 | promoter          |
| AT5G49100 | na                                   | unknown protei 5_19899104    |           | 4.38 | five_prime_UTR    |
| AT1G78420 | na                                   | RING/U-box sui 1_29504489    |           | 4.38 | promoter          |
| AT3G10910 | na                                   | RING/U-box sui 3_3413851     |           | 4.38 | five_prime_UTR    |
| AT1G52720 | na                                   | unknown protei 1_19640850    |           | 4.38 | promoter          |
| AT1G29060 | na                                   | Target SNARE r 1_10143779    |           | 4.38 | intergenic        |
| AT2G05920 | na                                   | Subtilase famil 2_2272374    |           | 4.38 | promoter          |
| AT3G58730 | na                                   | vacuolar ATP s1 3_21720054   |           | 4.38 | promoter          |
| AT4G34040 | na                                   | RING/U-box sui 4_16309074    |           | 4.38 | promoter          |
| AT5G14050 | na                                   | Transducin/WD 5_4533149      |           | 4.38 | promoter          |
| AT5G25930 | na                                   | Protein kinase f: 5_9050892  |           | 4.38 | exon              |
| AT5G48490 | na                                   | Bifunctional inhi 5_19648329 |           | 4.38 | promoter          |
| AT3G44320 | NITRILASE 3 (NIT3)                   | This enzyme ca 3_15991709    |           | 4.38 | proximal promoter |
| AT5G14040 | PHOSPHATE TRANSPORTER 3;1 (PHT3      | phosphate trans 5_4533149    |           | 4.38 | promoter          |
| AT3G58100 | PLASMODESMATA CALLOSE-BINDING I      | Encodes a merr 3_21516580    |           | 4.38 | promoter          |
| AT5G02010 | RHO GUANYL-NUCLEOTIDE EXCHANGI       | Encodes a merr 5_382573      |           | 4.38 | proximal promoter |
| AT5G13170 | SENESCENCE-ASSOCIATED GENE 29 (      | Encodes a merr 5_4185620     |           | 4.38 | proximal promoter |
| AT2G22540 | SHORT VEGETATIVE PHASE (SVP)         | Encodes a nucl 2_9580185     |           | 4.38 | five_prime_UTR    |
| AT2G45900 | TON1 RECRUITING MOTIF 13 (TRM13)     | Phosphatidylino 2_18889657   |           | 4.38 | proximal promoter |
| AT1G68720 | TRNA ARGININE ADENOSINE DEAMINA      | Encodes the ch 1_25802594    |           | 4.38 | proximal promoter |
| AT1G36340 | UBIQUITIN-CONJUGATING ENZYME 31      | ubiquitin-conjug 1_13683216  |           | 4.38 | intergenic        |
| AT2G28840 | XB3 ORTHOLOG 1 IN ARABIDOPSIS TH     | XB3 ortholog 1 i 2_12380990  |           | 4.38 | intergenic        |
| AT3G24503 | ALDEHYDE DEHYDROGENASE 2C4 (AL       | Arabidopsis thal 3_8918411   |           | 4.37 | intergenic        |
| AT1G44110 | CYCLIN A1;1 (CYCA1;1)                | Cyclin A1;1 (CY 1_16777397   |           | 4.37 | promoter          |
| AT1G03475 | LESION INITIATION 2 (LIN2)           | Encodes copro1 1_871353      |           | 4.37 | promoter          |
| AT3G24500 | MULTIPROTEIN BRIDGING FACTOR 1C      | One of three ge 3_8918411    |           | 4.37 | promoter          |
| AT1G56310 | na                                   | Polynucleotidyl 1_21082427   |           | 4.37 | promoter          |
| AT2G42760 | na                                   | unknown protei 2_17796161    |           | 4.37 | three_prime_UTR   |
| AT4G19160 | na                                   | unknown protei 4_10480190    |           | 4.37 | downstream        |
| AT5G08460 | na                                   | GDSL-like Lipas 5_2734250    |           | 4.37 | intron            |
| AT5G01210 | na                                   | HXXXD-type ac 5_82662        |           | 4.37 | proximal promoter |
| AT5G12150 | na                                   | Encodes a prote 5_3930413    |           | 4.37 | promoter          |
| AT5G57130 | na                                   | Clp amino termi 5_23149796   |           | 4.37 | downstream        |
| AT3G04430 | NAC DOMAIN CONTAINING PROTEIN 45     | NAC domain co 3_1175305      |           | 4.37 | downstream        |
| AT4G19170 | NINE-CIS-EPOXYCAROTENOID DIOXYG      | chloroplast-larq 4_10480190  |           | 4.37 | proximal promoter |
| AT1G08090 | NITRATE TRANSPORTER 2:1 (NRT2:1)     | High-affinity nitr 1_2522815 |           | 4.37 | proximal promoter |
| AT5G57140 | PURPLE ACID PHOSPHATASE 28 (PAP2     | purple acid pho: 5_23149796  |           | 4.37 | promoter          |
| AT1G74100 | SULFOTRANSFERASE 16 (SOT16)          | encodes a desu 1_27866012    |           | 4.37 | promoter          |
| AT4G28720 | YUCCA 8 (YUC8)                       | Auxin biosynthe 4_14184520   |           | 4.37 | intergenic        |
| AT4G37750 | AINTEGUMENTA (ANT)                   | ANT is required 4_17736637   |           | 4.36 | proximal promoter |
| AT1G27770 | AUTOINHIBITED CA2+-ATPASE 1 (ACA1    | Encodes a chlci 1_9676208    |           | 4.36 | promoter          |
| AT3G50660 | DWARF 4 (DWF4)                       | Encodes a 22& 3_18821123     |           | 4.36 | intergenic        |
| AT5G19820 | EMBRYO DEFECTIVE 2734 (emb2734)      | embryo defectiv 5_6695098    |           | 4.36 | downstream        |
| AT2G31570 | GLUTATHIONE PEROXIDASE 2 (GPX2)      | glutathione perc 2_13440898  |           | 4.36 | proximal promoter |
| AT5G47010 | LOW-LEVEL BETA-AMYLASE 1 (LBA1)      | Required for no 5_19079650   |           | 4.36 | intergenic        |
| AT5G51350 | MORE LATERAL GROWTH1 (MOL1)          | Encodes a rece 5_20870804    |           | 4.36 | promoter          |
| AT1G72490 | na                                   | unknown protei 1_27292767    |           | 4.36 | proximal promoter |

|           |                                                   |                              |      |                   |
|-----------|---------------------------------------------------|------------------------------|------|-------------------|
| AT3G14150 | na                                                | Aldolase-type T 3_4693172    | 4.36 | promoter          |
| AT4G33905 | na                                                | Peroxisomal me 4_16256189    | 4.36 | proximal promoter |
| AT5G19810 | na                                                | Proline-rich exte 5_6695098  | 4.36 | intergenic        |
| AT1G07280 | na                                                | Tetrapeptide 1_2237827       | 4.36 | promoter          |
| AT1G21920 | na                                                | Histone H3 K4-1_7706253      | 4.36 | promoter          |
| AT1G80850 | na                                                | DNA glycosylas 1_30387910    | 4.36 | promoter          |
| AT2G31218 | na                                                | unknown proteir 2_13302137   | 4.36 | exon              |
| AT1G55690 | na                                                | Sec14p-like phc 1_20813041   | 4.36 | promoter          |
| AT2G22530 | na                                                | Alkaline-phosph 2_9578605    | 4.36 | proximal promoter |
| AT3G15720 | na                                                | Pectin lyase-like 3_5328169  | 4.36 | proximal promoter |
| AT2G31580 | na                                                | tRNAHis quanyl 2_13440898    | 4.36 | downstream        |
| AT3G60210 | na                                                | GroES-like fami 3_22251040   | 4.36 | downstream        |
| AT3G60200 | na                                                | unknown proteir 3_22251040   | 4.36 | intergenic        |
| AT4G30010 | na                                                | unknown proteir 4_14672609   | 4.36 | promoter          |
| AT4G30000 | na                                                | Dihydropterin p1_4_14672609  | 4.36 | five_prime_UTR    |
| AT5G25210 | na                                                | unknown proteir 5_8728466    | 4.36 | intergenic        |
| AT5G47020 | na                                                | unknown proteir 5_19079650   | 4.36 | proximal promoter |
| AT1G80860 | PHOSPHOLIPID N-METHYLTRANSFERASE 1 (PLM1)         | Encodes a singl 1_30387910   | 4.36 | downstream        |
| AT1G75250 | RAD-LIKE 6 (RL6)                                  | RAD-like 6 (RL6) 1_28243553  | 4.36 | intergenic        |
| AT5G25910 | RECEPTOR LIKE PROTEIN 52 (RLP52)                  | putative disease 5_9038814   | 4.36 | promoter          |
| AT1G27760 | SALT-TOLERANCE 32 (SAT32)                         | Encodes a prot 1_9676208     | 4.36 | intergenic        |
| AT1G72310 | (ATL3)                                            | Encodes a puta 1_27224402    | 4.35 | proximal promoter |
| AT5G04660 | CYTOCHROME P450, FAMILY 77, SUBFAMILY 1 (CYP77A1) | encodes a prote 5_1337088    | 4.35 | exon              |
| AT5G12860 | DICARBOXYLATE TRANSPORTER 1 (DCT1)                | AtpOMT1 encoc 5_4062110      | 4.35 | promoter          |
| AT3G57290 | EUKARYOTIC TRANSLATION INITIATION FACTOR 1 (EIF1) | Encodes a prote 3_21199352   | 4.35 | promoter          |
| AT1G20693 | HIGH MOBILITY GROUP B2 (HMGB2)                    | Encodes a prote 1_7179406    | 4.35 | intergenic        |
| AT1G20696 | HIGH MOBILITY GROUP B3 (HMGB3)                    | Encodes a prote 1_7179406    | 4.35 | promoter          |
| AT1G27340 | LEAF CURLING RESPONSIVENESS (LCR)                 | Encodes a puta 1_9495471     | 4.35 | promoter          |
| AT5G10490 | MSCS-LIKE 2 (MSL2)                                | A member of Ms 5_3300158     | 4.35 | downstream        |
| AT2G22820 | na                                                | unknown proteir 2_9722204    | 4.35 | proximal promoter |
| AT3G04040 | na                                                | unknown proteir 3_1047499    | 4.35 | promoter          |
| AT3G08890 | na                                                | Protein of unkn 3_2706492    | 4.35 | promoter          |
| AT4G18530 | na                                                | Protein of unkn 4_10220339   | 4.35 | three_prime_UTR   |
| AT4G18540 | na                                                | unknown proteir 4_10220339   | 4.35 | intergenic        |
| AT4G20760 | na                                                | NAD(P)-binding 4_11128941    | 4.35 | promoter          |
| AT5G08460 | na                                                | GDSL-like Lipas 5_2733021    | 4.35 | promoter          |
| AT5G08450 | na                                                | CONTAINS Inte 5_2733021      | 4.35 | promoter          |
| AT5G66950 | na                                                | Pyridoxal phosph 5_26732166  | 4.35 | proximal promoter |
| AT5G10480 | PASTICCINO 2 (PAS2)                               | Protein tyrosine 5_3300158   | 4.35 | promoter          |
| AT4G00760 | PSEUDO-RESPONSE REGULATOR 8 (AP2.7)               | Encodes a resp 4_333666      | 4.35 | promoter          |
| AT2G28550 | RELATED TO AP2.7 (RAP2.7)                         | related to AP2.7 2_12233054  | 4.35 | intergenic        |
| AT4G00770 | TON1 RECRUITING MOTIF 9 (TRM9)                    | unknown proteir 4_333666     | 4.35 | downstream        |
| AT4G11150 | VACUOLAR ATP SYNTHASE SUBUNIT E (VAT1E)           | Encodes a vacc 4_6798610     | 4.35 | proximal promoter |
| AT2G39570 | ACT DOMAIN REPEATS 9 (ACR9)                       | Encodes a ACT 2_16509988     | 4.34 | three_prime_UTR   |
| AT5G63400 | ADENYLATE KINASE 1 (ADK1)                         | encodes a prote 5_25394928   | 4.34 | promoter          |
| AT1G08920 | ERD (EARLY RESPONSE TO DEHYDRATION) 1 (ERD1)      | Encodes ESL1, 1_2865954      | 4.34 | proximal promoter |
| AT1G47128 | RESPONSIVE TO DEHYDRATION 21A (RD21A)             | cysteine protein 1_17286680  | 4.34 | proximal promoter |
| AT1G31730 | na                                                | Adaptin family p 1_11359603  | 4.34 | promoter          |
| AT5G63410 | na                                                | Leucine-rich rep 5_25394928  | 4.34 | downstream        |
| AT1G76920 | na                                                | F-box family prc 1_28892188  | 4.34 | five_prime_UTR    |
| AT2G24560 | na                                                | GDSL-like Lipas 2_10430851   | 4.34 | proximal promoter |
| AT2G39580 | na                                                | CONTAINS Inte 2_16509988     | 4.34 | promoter          |
| AT5G20050 | na                                                | Protein kinase s 5_6776118   | 4.34 | intergenic        |
| AT5G01380 | na                                                | Homeodomain-l 5_158973       | 4.34 | proximal promoter |
| AT5G01390 | na                                                | DNAJ heat shoc 5_158973      | 4.34 | intergenic        |
| AT5G20060 | na                                                | alpha/beta-Hydr 5_6776118    | 4.34 | promoter          |
| AT1G73590 | PIN-FORMED 1 (PIN1)                               | Encodes an aux 1_27664618    | 4.34 | intergenic        |
| AT4G02460 | POSTMEIOTIC SEGREGATION 1 (PMS1)                  | Encodes a prote 4_1080757    | 4.34 | promoter          |
| AT1G43890 | RAB GTPASE HOMOLOG B18 (RAB18)                    | ras-related sma 1_16646663   | 4.34 | promoter          |
| AT5G24270 | SALT OVERLY SENSITIVE 3 (SOS3)                    | encodes a calci 5_8241746    | 4.34 | intron            |
| AT2G43130 | (ARA4)                                            | encodes a prote 2_17929606   | 4.33 | downstream        |
| AT1G60710 | (ATB2)                                            | Encodes ATB2. 1_22356756     | 4.33 | five_prime_UTR    |
| AT3G63140 | CHLOROPLAST STEM-LOOP BINDING FACTOR 1 (CSLB1)    | Encodes a prote 3_23328797   | 4.33 | promoter          |
| AT5G48890 | LATE FLOWERING (LATE)                             | Encodes a C(2) 5_19822715    | 4.33 | intergenic        |
| AT3G63150 | MIRO-RELATED GTP-ASE 2 (MIRO2)                    | Encodes a calci 3_23328797   | 4.33 | downstream        |
| AT3G50340 | na                                                | unknown proteir 3_18667733   | 4.33 | proximal promoter |
| AT1G07830 | na                                                | ribosomal protei 1_2422126   | 4.33 | promoter          |
| AT2G47390 | na                                                | Prolyl oligopepti 2_19446374 | 4.33 | promoter          |
| AT2G47410 | na                                                | WD40/YVTN rei 2_19446374     | 4.33 | proximal promoter |
| AT3G15810 | na                                                | Protein of unkn 3_5348147    | 4.33 | exon              |
| AT3G05220 | na                                                | Heavy metal tra 3_1487237    | 4.33 | proximal promoter |
| AT4G27700 | na                                                | Rhodanese/Cell 4_13827980    | 4.33 | promoter          |
| AT5G53451 | na                                                | This gene encod 5_21693205   | 4.33 | promoter          |
| AT3G54220 | SCARECROW (SCR)                                   | Encodes a merr 3_20069264    | 4.33 | proximal promoter |
| AT2G45980 | ATG8-INTERACTING PROTEIN 1 (ATH1)                 | Encodes an Atg 2_18919206    | 4.32 | promoter          |
| AT2G42970 | na                                                | pre-tRNA; tRNA 2_17873817    | 4.32 | downstream        |
| AT2G42975 | na                                                | unknown proteir 2_17873817   | 4.32 | promoter          |
| AT1G29060 | na                                                | Target SNARE 1_10147561      | 4.32 | promoter          |
| AT2G45990 | na                                                | unknown proteir 2_18919206   | 4.32 | promoter          |
| AT3G06890 | na                                                | unknown proteir 3_2177703    | 4.32 | downstream        |
| AT3G06895 | na                                                | unknown proteir 3_2177703    | 4.32 | promoter          |
| AT3G06880 | na                                                | Transducin/WD 3_2177703      | 4.32 | proximal promoter |
| AT3G46020 | na                                                | RNA-binding (R 3_16912236    | 4.32 | downstream        |
| AT1G68140 | na                                                | Protein of unkn 1_25541725   | 4.32 | five_prime_UTR    |
| AT1G01250 | na                                                | encodes a mem 1_103837       | 4.32 | intergenic        |
| AT4G22820 | na                                                | A20/AN1-like zif 4_11989077  | 4.32 | promoter          |
| AT1G03630 | PROTOCHLOROPHYLLIDE OXIDOREDUCTASE 1 (PCO1)       | Encodes for a p 1_907478     | 4.32 | promoter          |
| AT3G06900 | U4 SMALL NUCLEOLAR RNA2 (U4.2)                    | U4.2; snRNA; q 3_2177703     | 4.32 | intergenic        |
| AT1G65630 | DEGP PROTEASE 3 (DegP3)                           | Encodes a puta 1_24404404    | 4.31 | intergenic        |
| AT4G03430 | EMBRYO DEFECTIVE 2770 (EMB2770)                   | Encodes a nucl 4_1520738     | 4.31 | promoter          |
| AT5G26030 | FERROCHELATASE 1 (FC1)                            | encodes ferroc 5_9096535     | 4.31 | five_prime_UTR    |
| AT1G02390 | GLYCEROL-3-PHOSPHATE ACYLTRANSFERASE 1 (GAT1)     | Encodes a merr 1_483080      | 4.31 | exon              |
| AT5G26040 | HISTONE DEACETYLASE 2 (HDA2)                      | Class III RPD3 1_5_9096535   | 4.31 | intergenic        |
| AT1G19850 | MONOPTEROS (MP)                                   | Encodes a trans 1_6883275    | 4.31 | intergenic        |

|           |                                     |                              |      |                   |
|-----------|-------------------------------------|------------------------------|------|-------------------|
| AT3G09370 | MYB DOMAIN PROTEIN 3R-3 (MYB3R-3)   | putative c-myb-3_2879163     | 4.31 | promoter          |
| AT1G74430 | MYB DOMAIN PROTEIN 95 (MYB95)       | Encodes a puta 1_27973012    | 4.31 | proximal promoter |
| AT1G02391 | na                                  | unknown proteir 1_483080     | 4.31 | intergenic        |
| AT2G45290 | na                                  | Tranскетolase; 1_2_18672194  | 4.31 | promoter          |
| AT1G53290 | na                                  | Galactosyltrans 1_19871332   | 4.31 | five_prime_UTR    |
| AT4G03435 | na                                  | pre-tRNA; tRNA 4_1520738     | 4.31 | downstream        |
| AT5G43830 | na                                  | Aluminium induc 5_17625135   | 4.31 | proximal promoter |
| AT2G14910 | na                                  | unknown proteir 2_6409141    | 4.31 | five_prime_UTR    |
| AT1G14590 | na                                  | Nucleotide-diph 1_4997619    | 4.31 | intergenic        |
| AT5G14920 | na                                  | Gibberellin-requ 5_4828478   | 4.31 | intergenic        |
| AT5G54855 | na                                  | Pollen Ole e 1 a 5_22282643  | 4.31 | promoter          |
| AT5G13640 | PHOSPHOLIPID:DIACYLGLYCEROL AC      | arabidopsis pho 5_4393189    | 4.31 | five_prime_UTR    |
| AT2G21140 | PROLINE-RICH PROTEIN 2 (PRP2)       | Proline-rich prot 2_9062962  | 4.31 | proximal promoter |
| AT2G45280 | RAS ASSOCIATED WITH DIABETES PRC    | Encodes a prot 2_18672194    | 4.31 | three_prime_UTR   |
| AT5G14930 | SENESCENCE-ASSOCIATED GENE 101      | encodes an acy 5_4828478     | 4.31 | promoter          |
| AT3G26520 | TONOPLAST INTRINSIC PROTEIN 2 (TIF  | gamma tonopla: 3_9722030     | 4.31 | intergenic        |
| AT2G18730 | DIACYLGLYCEROL KINASE 3 (DGK3)      | diacylglycerol ki 2_8118746  | 4.3  | promoter          |
| AT3G60900 | FASCICLIN-LIKE ARABINOGLACTAN-P     | FASCICLIN-like 3_22499144    | 4.3  | downstream        |
| AT4G25100 | FE SUPEROXIDE DISMUTASE 1 (FSD1)    | Fe-superoxide c 4_12884398   | 4.3  | three_prime_UTR   |
| AT1G12900 | GLYCERALDEHYDE 3-PHOSPHATE DEH      | glyceraldehyde 1_4394482     | 4.3  | promoter          |
| AT1G71340 | GLYCEROPHOSPHODIESTER PHOSPH        | Encodes a merr 1_26887603    | 4.3  | five_prime_UTR    |
| AT5G03040 | IQ-DOMAIN 2 (iqd2)                  | IQ-domain 2 (iqi 5_709868    | 4.3  | downstream        |
| AT2G27680 | na                                  | NAD(P)-linked c 2_11807173   | 4.3  | proximal promoter |
| AT1G65110 | na                                  | Ubiquitin carbox 1_24188450  | 4.3  | promoter          |
| AT2G38240 | na                                  | 2-oxoglutarate ( 2_16013911  | 4.3  | intron            |
| AT3G60897 | na                                  | This gene encod 3_22499144   | 4.3  | promoter          |
| AT3G60910 | na                                  | S-adenosyl-L-m 3_22499144    | 4.3  | proximal promoter |
| AT4G33170 | na                                  | Tetratricopeptid 4_15999276  | 4.3  | proximal promoter |
| AT1G15030 | na                                  | Encodes a Cyst 1_5176320     | 4.3  | proximal promoter |
| AT1G26797 | na                                  | Plant self-incom 1_9280290   | 4.3  | proximal promoter |
| AT1G26860 | na                                  | transposable elk 1_9306662   | 4.3  | proximal promoter |
| AT1G78030 | na                                  | unknown proteir 1_29343158   | 4.3  | exon              |
| AT2G45520 | na                                  | unknown proteir 2_18756358   | 4.3  | promoter          |
| AT4G11680 | na                                  | Zinc finger, C3F 4_7055702   | 4.3  | promoter          |
| AT4G04340 | na                                  | ERD (early-resp 4_2122688    | 4.3  | five_prime_UTR    |
| AT4G15590 | na                                  | transposable elk 4_8907813   | 4.3  | proximal promoter |
| AT4G25090 | na                                  | Riboflavin synth 4_12884398  | 4.3  | proximal promoter |
| AT5G03030 | na                                  | Chaperone Dna 5_709868       | 4.3  | promoter          |
| AT5G24490 | na                                  | 30S ribosomal r 5_8365602    | 4.3  | five_prime_UTR    |
| AT5G27150 | NA+/H+ EXCHANGER 1 (NHX1)           | Encodes a vacc 5_9553399     | 4.3  | promoter          |
| AT1G69490 | NAC-LIKE, ACTIVATED BY AP3/PI (NAP) | Encodes a merr 1_26120910    | 4.3  | proximal promoter |
| AT4G05180 | PHOTOSYSTEM II SUBUNIT Q-2 (PSBQ-   | Encodes the Ps 4_2673298     | 4.3  | promoter          |
| AT5G58600 | POWDERY MILDEW RESISTANT 5 (PMR     | Belongs to a lar 5_23685841  | 4.3  | promoter          |
| AT1G15020 | QUIESCIN-SULFHYDRYL OXIDASE 1 (Q    | Encodes a prot 1_5176320     | 4.3  | promoter          |
| AT3G43210 | TETRASPORE (TES)                    | Encodes a kine: 3_15190713   | 4.3  | promoter          |
| AT2G42570 | TRICHOME BIREFRINGENCE-LIKE 39 (T   | Encodes a merr 2_17719479    | 4.3  | intron            |
| AT1G80840 | WRKY DNA-BINDING PROTEIN 40 (WRK    | Pathogen-induc 1_30380543    | 4.3  | intergenic        |
| AT4G29010 | ABNORMAL INFLORESCENCE MERISTE      | Functions in bet 4_14302301  | 4.29 | promoter          |
| AT5G05700 | ARGININE-TRNA PROTEIN TRANSFERA     | Encodes an arg 5_1712431     | 4.29 | intergenic        |
| AT4G34700 | B22 SUBUNIT OF EUKARYOTIC MITOCH    | Encodes the B2 4_16556757    | 4.29 | promoter          |
| AT1G21910 | DEHYDRATION RESPONSE ELEMENT-E      | encodes a mem 1_7699279      | 4.29 | intergenic        |
| AT4G39640 | GAMMA-GLUTAMYL TRANSPEPTIDASE       | The gene encoc 4_18399823    | 4.29 | promoter          |
| AT4G15440 | HYDROPEROXIDE LYASE 1 (HPL1)        | Encodes a hydr 4_8838094     | 4.29 | exon              |
| AT1G49430 | LONG-CHAIN ACYL-COA SYNTHETASE      | Encodes a long 1_18290934    | 4.29 | promoter          |
| AT4G24415 | MICRORNA824A (MIR824A)              | Encodes a micr 4_12622862    | 4.29 | proximal promoter |
| AT5G44080 | na                                  | Basic-leucine zi 5_17739986  | 4.29 | promoter          |
| AT2G14878 | na                                  | na 2_6392896                 | 4.29 | exon              |
| AT4G02090 | na                                  | unknown proteir 4_924795     | 4.29 | intergenic        |
| AT4G15450 | na                                  | Senescence/de 4_8838094      | 4.29 | proximal promoter |
| AT1G26390 | na                                  | FAD-binding Be 1_9132747     | 4.29 | proximal promoter |
| AT2G38070 | na                                  | Protein of unknc 2_15927073  | 4.29 | proximal promoter |
| AT1G61460 | na                                  | S-locus protein 1_22677645   | 4.29 | five_prime_UTR    |
| AT1G03220 | na                                  | Eukaryotic aspa 1_786981     | 4.29 | promoter          |
| AT2G36145 | na                                  | unknown proteir 2_15169574   | 4.29 | downstream        |
| AT2G36150 | na                                  | pre-tRNA; tRNA 2_15169574    | 4.29 | promoter          |
| AT1G15840 | na                                  | unknown proteir 1_5452536    | 4.29 | downstream        |
| AT1G78260 | na                                  | RNA-binding (R 1_29446986    | 4.29 | five_prime_UTR    |
| AT2G20060 | na                                  | Ribosomal prote 2_8657360    | 4.29 | proximal promoter |
| AT4G34695 | na                                  | pre-tRNA; tRNA 4_16556757    | 4.29 | downstream        |
| AT5G11416 | na                                  | This gene encod 5_3642908    | 4.29 | exon              |
| AT1G23550 | SIMILAR TO RCD ONE 2 (SRO2)         | Encodes a prot 1_8350255     | 4.29 | proximal promoter |
| AT5G11590 | TINY2 (TINY2)                       | encodes a mem 5_3728799      | 4.29 | promoter          |
| AT4G24670 | TRYPTOPHAN AMINOTRANSFERASE R       | Encodes a prot 4_12729898    | 4.29 | intron            |
| AT1G23480 | CELLULOSE SYNTHASE-LIKE A3 (CSLA    | encodes a gene 1_8333617     | 4.28 | intron            |
| AT2G36800 | DON-GLUCOSYLTRANSFERASE 1 (DOC      | Encodes a DON 2_15425271     | 4.28 | promoter          |
| AT2G26300 | G PROTEIN ALPHA SUBUNIT 1 (GP ALP   | Encodes an alp 2_11197052    | 4.28 | five_prime_UTR    |
| AT3G63480 | na                                  | ATP binding mic 3_23444110   | 4.28 | promoter          |
| AT4G34320 | na                                  | Protein of unknc 4_16419895  | 4.28 | proximal promoter |
| AT1G18070 | na                                  | Translation elon 1_6218416   | 4.28 | promoter          |
| AT1G64150 | na                                  | Uncharacterizer 1_23812807   | 4.28 | promoter          |
| AT3G51290 | na                                  | Protein of unknc 3_19041181  | 4.28 | intron            |
| AT2G47820 | na                                  | unknown proteir 2_19587009   | 4.28 | promoter          |
| AT2G40270 | na                                  | Protein kinase f: 2_16825196 | 4.28 | proximal promoter |
| AT2G14860 | na                                  | Peroxisomal me 2_6389762     | 4.28 | promoter          |
| AT2G25735 | na                                  | unknown proteir 2_10975874   | 4.28 | promoter          |
| AT2G25737 | na                                  | Sulfite exporter 2_10975874  | 4.28 | proximal promoter |
| AT2G36810 | na                                  | ARM repeat sur 2_15425271    | 4.28 | downstream        |
| AT2G01410 | na                                  | NHL domain-co 2_178024       | 4.28 | proximal promoter |
| AT3G22072 | na                                  | Potential natura 3_7773078   | 4.28 | proximal promoter |
| AT3G05160 | na                                  | Major facilitator 3_1453584  | 4.28 | exon              |
| AT5G38990 | na                                  | Malectin/recept 5_15608746   | 4.28 | promoter          |
| AT5G57760 | na                                  | unknown proteir 5_23400465   | 4.28 | promoter          |
| AT1G02500 | S-ADENOSYLMETHIONINE SYNTHETAS      | encodes a S-ad 1_518126      | 4.28 | promoter          |
| AT5G48450 | SKU5 SIMILAR 3 (sks3)               | Encodes a prot 5_19635734    | 4.28 | promoter          |

|           |                                     |                   |              |      |                   |
|-----------|-------------------------------------|-------------------|--------------|------|-------------------|
| AT3G11730 | (ATFP8)                             | Encodes a merr    | 3_3711626    | 4.27 | promoter          |
| AT3G61190 | BON ASSOCIATION PROTEIN 1 (BAP1)    | Encodes a prot    | 3_22650026   | 4.27 | downstream        |
| AT5G47100 | CALCINEURIN B-LIKE PROTEIN 9 (CBL9) | member of AtCf    | 5_19131006   | 4.27 | intron            |
| AT1G12740 | CYTOCHROME P450, FAMILY 87, SUBF    | encodes a prote   | 1_4340350    | 4.27 | proximal promoter |
| AT2G29980 | FATTY ACID DESATURASE 3 (FAD3)      | Endoplasmic re    | 2_12781512   | 4.27 | downstream        |
| AT3G16360 | HPT PHOSPHOTRANSMITTER 4 (AHP4)     | Encodes AHP4,     | 3_5552775    | 4.27 | proximal promoter |
| AT1G32240 | KANADI 2 (KAN2)                     | Encodes a merr    | 1_11630657   | 4.27 | promoter          |
| AT3G24090 | L-GLUTAMINE D-FRUCTOSE-6-PHOSPH     | Encodes a glut    | 3_8701119    | 4.27 | promoter          |
| AT5G23680 | na                                  | Sterile alpha mc  | 5_7986601    | 4.27 | five_prime_UTR    |
| AT1G63390 | na                                  | FAD/NAD(P)-bi     | 1_23507142   | 4.27 | promoter          |
| AT1G75510 | na                                  | Transcription ini | 1_28349011   | 4.27 | promoter          |
| AT1G23000 | na                                  | Heavy metal tra   | 1_8145240    | 4.27 | downstream        |
| AT3G08910 | na                                  | DNAJ heat shoc    | 3_2712076    | 4.27 | promoter          |
| AT3G08920 | na                                  | Rhodanese/Cel     | 3_2712076    | 4.27 | promoter          |
| AT3G25600 | na                                  | Calcium-binding   | 3_9307122    | 4.27 | promoter          |
| AT3G08930 | na                                  | LMBR1-like mer    | 3_2712076    | 4.27 | proximal promoter |
| AT4G22980 | na                                  | FUNCTIONS IN      | 4_12046495   | 4.27 | proximal promoter |
| AT4G39270 | na                                  | Leucine-rich re   | 4_18279910   | 4.27 | downstream        |
| AT4G39280 | na                                  | phenylalanyl-tR   | 4_18279910   | 4.27 | downstream        |
| AT5G59080 | na                                  | unknown protei    | 5_23850233   | 4.27 | proximal promoter |
| AT1G16390 | ORGANIC CATION/CARNITINE TRANSP     | organic cation/c  | 1_5602666    | 4.27 | promoter          |
| AT5G15600 | SPIRAL1-LIKE4 (SP1L4)               | SPIRAL1-LIKE4     | 5_5077367    | 4.27 | proximal promoter |
| AT1G08880 | (H2AXA)                             | Encodes HTA5,     | 1_2848234    | 4.26 | promoter          |
| AT4G34530 | CRYPTOCHROME-INTERACTING BASIC      | Encodes a trans   | 4_16498315   | 4.26 | promoter          |
| AT3G54050 | HIGH CYCLIC ELECTRON FLOW 1 (HCE    | Encodes a chlor   | 3_20016732   | 4.26 | promoter          |
| AT4G27230 | HISTONE H2A 2 (HTA2)                | Encodes HTA2,     | 4_13638502   | 4.26 | promoter          |
| AT4G22260 | IMMUTANS (IM)                       | Similar to mitoc  | 4_11772584   | 4.26 | promoter          |
| AT3G09230 | MYB DOMAIN PROTEIN 1 (MYB1)         | member of MYE     | 3_2833245    | 4.26 | promoter          |
| AT1G52330 | na                                  | Late embryoger    | 1_19489288   | 4.26 | exon              |
| AT3G11590 | na                                  | unknown protei    | 3_3660304    | 4.26 | promoter          |
| AT5G64120 | na                                  | encodes a cell    | 5_25661090   | 4.26 | promoter          |
| AT1G08870 | na                                  | pre-tRNA; tRNA    | 1_2848234    | 4.26 | proximal promoter |
| AT1G08890 | na                                  | Major facilitator | 1_2848234    | 4.26 | promoter          |
| AT1G69430 | na                                  | unknown protei    | 1_26097712   | 4.26 | promoter          |
| AT1G76940 | na                                  | RNA-binding (R    | 1_28902096   | 4.26 | intergenic        |
| AT2G27500 | na                                  | Glycosyl hydro    | 2_11753974   | 4.26 | five_prime_UTR    |
| AT3G16370 | na                                  | GDSL-like Lipas   | 3_5559064    | 4.26 | intergenic        |
| AT4G34540 | na                                  | encodes a prote   | 4_16498315   | 4.26 | promoter          |
| AT5G62770 | na                                  | Protein of unkn   | 5_25211346   | 4.26 | exon              |
| AT5G57240 | OSBP(OXYSTEROL BINDING PROTEIN)     | OSBP(oxyestero    | 5_23192323   | 4.26 | proximal promoter |
| AT3G02150 | PLASTID TRANSCRIPTION FACTOR 1 (F   | a chloroplast tra | 3_390909     | 4.26 | promoter          |
| AT3G16380 | POLY(A) BINDING PROTEIN 6 (PAB6)    | polyadenylate-b   | 3_5559064    | 4.26 | intron            |
| AT1G41830 | SKU5-SIMILAR 6 (SKS6)               | SKU5-similar      | 6_1_15606009 | 4.26 | intron            |
| AT5G62170 | TON1 RECRUITING MOTIF 25 (TRM25)    | unknown protei    | 5_24977211   | 4.26 | proximal promoter |
| AT4G38920 | VACUOLAR-TYPE H(+)-ATPASE C3 (VH/   | vacuolar-type H   | 4_18147061   | 4.26 | promoter          |
| AT1G58270 | (ZW9)                               | ZW9 mRNA, co      | 1_21617211   | 4.25 | intergenic        |
| AT5G46290 | 3-KETOACYL-ACYL CARRIER PROTEIN     | Encodes beta-k    | 5_18773889   | 4.25 | downstream        |
| AT1G73680 | ALPHA DIOXYGENASE (ALPHA DOX2)      | Encodes an alp    | 1_27707496   | 4.25 | five_prime_UTR    |
| AT3G28860 | ATP-BINDING CASSETTE B19 (ABC B19)  | Belongs to the    | 3_10872310   | 4.25 | intron            |
| AT2G24610 | CYCLIC NUCLEOTIDE-GATED CHANNEL     | member of Cycl    | 2_10457971   | 4.25 | intron            |
| AT2G28650 | EXOCYST SUBUNIT EXO70 FAMILY PRC    | A member of E     | 2_12289469   | 4.25 | exon              |
| AT1G02390 | GLYCEROL-3-PHOSPHATE ACYLTRANS      | Encodes a merr    | 1_479081     | 4.25 | proximal promoter |
| AT1G73687 | MICRORNA159A (MIR159A)              | Encodes a micr    | 1_27711886   | 4.25 | intergenic        |
| AT5G46280 | MINICHROMOSOME MAINTENANCE 3 (I     | MINICHROMOS       | 5_18773889   | 4.25 | promoter          |
| AT4G20480 | na                                  | Putative endon    | 4_11035318   | 4.25 | exon              |
| AT1G02380 | na                                  | unknown protei    | 1_479081     | 4.25 | downstream        |
| AT1G15125 | na                                  | S-adenosyl-L-m    | 1_5204427    | 4.25 | promoter          |
| AT1G18820 | na                                  | pre-tRNA; tRNA    | 1_6488217    | 4.25 | promoter          |
| AT1G18830 | na                                  | Transducin/WVD    | 1_6488217    | 4.25 | proximal promoter |
| AT1G73210 | na                                  | Protein of unkn   | 1_27533157   | 4.25 | proximal promoter |
| AT2G19790 | na                                  | SNARE-like sup    | 2_8526925    | 4.25 | promoter          |
| AT1G15120 | na                                  | Ubiquinol-cyto    | 1_5204427    | 4.25 | intergenic        |
| AT4G13263 | na                                  | Protein of unkn   | 4_7716008    | 4.25 | intergenic        |
| AT5G19095 | na                                  | pre-tRNA; tRNA    | 5_6398517    | 4.25 | proximal promoter |
| AT5G04670 | na                                  | Enhancer of pol   | 5_1341671    | 4.25 | proximal promoter |
| AT5G23350 | na                                  | GRAM domain-      | 5_7860104    | 4.25 | proximal promoter |
| AT5G57170 | na                                  | Tautomerase/M     | 5_23163376   | 4.25 | promoter          |
| AT3G61910 | NAC DOMAIN PROTEIN 66 (NAC066)      | NAC transcripti   | 3_22931244   | 4.25 | proximal promoter |
| AT5G62170 | TON1 RECRUITING MOTIF 25 (TRM25)    | unknown protei    | 5_24972804   | 4.25 | downstream        |
| AT4G23010 | UDP-GALACTOSE TRANSPORTER 2 (U      | UDP-galactose     | 4_12062827   | 4.25 | intron            |
| AT1G76410 | (ATL8)                              | ATL8; FUNCTIO     | 1_28669396   | 4.24 | exon              |
| AT3G12570 | (FYD)                               | FYD; LOCATEC      | 3_3988678    | 4.24 | intron            |
| AT1G02205 | ECERIFERUM 1 (CER1)                 | Expression of th  | 1_420307     | 4.24 | intron            |
| AT4G17500 | ETHYLENE RESPONSIVE ELEMENT BIN     | Encodes a merr    | 4_9757305    | 4.24 | proximal promoter |
| AT1G54690 | GAMMA HISTONE VARIANT H2AX (GAM     | Encodes HTA3,     | 1_20415447   | 4.24 | promoter          |
| AT1G18970 | GERMIN-LIKE PROTEIN 4 (GLP4)        | Encodes a germ    | 1_6555946    | 4.24 | proximal promoter |
| AT1G69330 | na                                  | RING/U-box su     | 1_26065648   | 4.24 | promoter          |
| AT2G01422 | na                                  | na                | 2_183412     | 4.24 | proximal promoter |
| AT5G18460 | na                                  | Protein of Unkn   | 5_6127115    | 4.24 | intergenic        |
| AT5G18470 | na                                  | Curculin-like     | (m_5_6127115 | 4.24 | proximal promoter |
| AT2G01240 | na                                  | Reticulon fami    | 2_131220     | 4.24 | proximal promoter |
| AT1G08180 | na                                  | unknown protei    | 1_2565647    | 4.24 | proximal promoter |
| AT1G25682 | na                                  | Family of unkn    | 1_9004670    | 4.24 | promoter          |
| AT3G22700 | na                                  | F-box and asso    | 3_8025961    | 4.24 | promoter          |
| AT4G15790 | na                                  | unknown protei    | 4_8981716    | 4.24 | promoter          |
| AT4G39670 | na                                  | Glycolipid trans  | 4_18410033   | 4.24 | promoter          |
| AT5G65207 | na                                  | unknown protei    | 5_26052628   | 4.24 | five_prime_UTR    |
| AT5G45110 | NPR1-LIKE PROTEIN 3 (NPR3)          | Encodes a para    | 5_18228862   | 4.24 | promoter          |
| AT2G01420 | PIN-FORMED 4 (PIN4)                 | Encodes a puta    | 2_183412     | 4.24 | promoter          |
| AT4G27410 | RESPONSIVE TO DESICCATION 26 (RD)   | Encodes a NAC     | 4_13709256   | 4.24 | promoter          |
| AT3G53530 | SODIUM POTASSIUM ROOT DEFECTIVE     | Chloroplast-tar   | 3_19845015   | 4.24 | promoter          |
| AT4G15780 | VESICLE-ASSOCIATED MEMBRANE PR      | member of VAM     | 4_8981716    | 4.24 | five_prime_UTR    |
| AT4G16160 | (ATOEP16-2)                         | Homologous to     | 4_9159011    | 4.23 | downstream        |
| AT5G60360 | ALEURAIN-LIKE PROTEASE (ALP)        | Encodes a sene    | 5_24279815   | 4.23 | promoter          |

|           |                                   |                            |              |      |                   |
|-----------|-----------------------------------|----------------------------|--------------|------|-------------------|
| AT1G08980 | AMIDASE 1 (AMI1)                  | Encodes an enz             | 1_2884387    | 4.23 | promoter          |
| AT5G62430 | CYCLING DOF FACTOR 1 (CDF1)       | Dof-type zinc fir          | 5_25071472   | 4.23 | proximal promoter |
| AT3G59100 | GLUCAN SYNTHASE-LIKE 11 (GSL11)   | encodes a prote            | 3_21853975   | 4.23 | downstream        |
| AT2G30860 | GLUTATHIONE S-TRANSFERASE PHI 9   | Encodes glutatr            | 2_13139031   | 4.23 | five_prime_UTR    |
| AT2G18950 | HOMOGENITISATE PHYTYLTRANSFERA    | Encodes homoç              | 2_8207038    | 4.23 | promoter          |
| AT1G73500 | MAP KINASE KINASE 9 (MKK9)        | member of MAF              | 1_27638483   | 4.23 | intergenic        |
| AT4G00870 | na                                | basic helix-loop           | 4_363793     | 4.23 | promoter          |
| AT1G26950 | na                                | transposable elk           | 1_9355006    | 4.23 | proximal promoter |
| AT2G31090 | na                                | unknown protei             | 2_13256194   | 4.23 | five_prime_UTR    |
| AT2G35360 | na                                | ubiquitin family           | 1_2_14890992 | 4.23 | promoter          |
| AT2G27770 | na                                | Plant protein of           | 2_11834365   | 4.23 | five_prime_UTR    |
| AT3G59110 | na                                | Protein kinase s           | 3_21853975   | 4.23 | proximal promoter |
| AT4G03250 | na                                | Homeodomain-l              | 4_1428059    | 4.23 | intergenic        |
| AT4G03260 | na                                | Outer arm dyne             | 4_1428059    | 4.23 | promoter          |
| AT4G16162 | na                                | Leucine-rich re            | 4_9159011    | 4.23 | downstream        |
| AT5G47060 | na                                | Protein of unkn            | 5_19116700   | 4.23 | promoter          |
| AT5G62950 | na                                | RNA polymeras              | 5_25264132   | 4.23 | promoter          |
| AT5G66910 | na                                | Disease resist             | 5_26721461   | 4.23 | promoter          |
| AT1G08970 | NUCLEAR FACTOR Y, SUBUNIT C9 (NF- | heme activated             | 1_2884387    | 4.23 | downstream        |
| AT4G37870 | PHOSPHOENOLPYRUVATE CARBOXYK      | Encodes a phos             | 4_17806668   | 4.23 | promoter          |
| AT2G20610 | SUPERROOT 1 (SUR1)                | Confers auxin o            | 2_8880494    | 4.23 | promoter          |
| AT4G16740 | TERPENE SYNTHASE 03 (TPS03)       | Encodes an (E),            | 4_9407119    | 4.23 | proximal promoter |
| AT5G53190 | (SWEET3)                          | Nodulin MtN3 fe            | 5_21576609   | 4.22 | proximal promoter |
| AT1G23310 | GLUTAMATE:GLYOXYLATE AMINOTRA     | Identified by clo          | 1_8272020    | 4.22 | promoter          |
| AT2G05290 | na                                | transposable elk           | 2_1926598    | 4.22 | exon              |
| AT1G08270 | na                                | CONTAINS Inte              | 1_2607774    | 4.22 | promoter          |
| AT1G71520 | na                                | encodes a mem              | 1_26938019   | 4.22 | proximal promoter |
| AT1G72416 | na                                | Chaperone Dna              | 1_27259584   | 4.22 | intron            |
| AT3G11420 | na                                | Protein of unkn            | 3_3590606    | 4.22 | proximal promoter |
| AT3G50350 | na                                | Protein of unkn            | 3_18673048   | 4.22 | intron            |
| AT5G38200 | na                                | Class I glutamin           | 5_15258031   | 4.22 | intron            |
| AT5G04440 | na                                | Protein of unkn            | 5_1254801    | 4.22 | promoter          |
| AT4G25700 | BETA-HYDROXYLASE 1 (BETA-OHASE    | Converts beta-c            | 4_13095964   | 4.21 | promoter          |
| AT5G64905 | ELICITOR PEPTIDE 3 PRECURSOR (PR  | elicitor peptide           | 5_25938213   | 4.21 | proximal promoter |
| AT4G19960 | K+ UPTAKE PERMEASE 9 (KUP9)       | Encodes a pota             | 4_10813138   | 4.21 | promoter          |
| AT2G47610 | na                                | Ribosomal prote            | 2_19528971   | 4.21 | proximal promoter |
| AT4G36850 | na                                | PQ-loop repeat             | 4_17357804   | 4.21 | proximal promoter |
| AT4G36860 | na                                | LIM domain-cor             | 4_17357804   | 4.21 | intergenic        |
| AT1G62301 | na                                | unknown protei             | 1_23024038   | 4.21 | intergenic        |
| AT1G04280 | na                                | P-loop containir           | 1_1145863    | 4.21 | intron            |
| AT1G68490 | na                                | unknown protei             | 1_25695716   | 4.21 | intergenic        |
| AT3G53430 | na                                | Ribosomal prote            | 3_19808408   | 4.21 | intergenic        |
| AT3G58610 | na                                | ketol-acid reduc           | 3_21675361   | 4.21 | intergenic        |
| AT4G11300 | na                                | CONTAINS Inte              | 4_6875005    | 4.21 | proximal promoter |
| AT4G27020 | na                                | unknown protei             | 4_13571696   | 4.21 | promoter          |
| AT5G24040 | na                                | Protein of unkn            | 5_8125589    | 4.21 | intergenic        |
| AT5G64900 | PRECURSOR OF PEPTIDE 1 (PROPEP1   | Encodes a puta             | 5_25938213   | 4.21 | downstream        |
| AT3G09880 | (ATB' BETA)                       | Encodes B' regi            | 3_3028549    | 4.2  | proximal promoter |
| AT3G02920 | (RPA32B)                          | RPA32B; FUNC               | 3_654560     | 4.2  | promoter          |
| AT1G53280 | DJ-1 HOMOLOG B (DJ1B)             | Encodes a hom              | 1_19867514   | 4.2  | promoter          |
| AT3G52930 | FRUCTOSE-BISPHOSPHATE ALDOLASE    | Aldolase super             | 3_19629091   | 4.2  | promoter          |
| AT3G63030 | METHYL-CPG-BINDING DOMAIN 4 (MBC  | Protein containi           | 3_23295189   | 4.2  | promoter          |
| AT1G70420 | na                                | Protein of unkn            | 1_26541470   | 4.2  | proximal promoter |
| AT4G38330 | na                                | Integral membr             | 4_17951230   | 4.2  | promoter          |
| AT3G09870 | na                                | SAUR-like aux              | 3_3028549    | 4.2  | proximal promoter |
| AT1G17360 | na                                | BEST Arabidop:             | 1_5946303    | 4.2  | promoter          |
| AT1G27470 | na                                | transducin famil           | 1_9544337    | 4.2  | promoter          |
| AT1G64600 | na                                | methyltransfera:           | 1_23995805   | 4.2  | promoter          |
| AT2G38646 | na                                | unknown protei             | 2_16160150   | 4.2  | promoter          |
| AT3G02315 | na                                | pre-tRNA; tRNA             | 3_469745     | 4.2  | downstream        |
| AT3G09032 | na                                | unknown protei             | 3_2757183    | 4.2  | intergenic        |
| AT3G23480 | na                                | Cyclopropane-fi            | 3_8418772    | 4.2  | promoter          |
| AT3G63020 | na                                | Protein of unkn            | 3_23295189   | 4.2  | downstream        |
| AT5G01890 | na                                | Leucine-rich rec           | 5_344904     | 4.2  | five_prime_UTR    |
| AT3G16640 | TRANSLATIONALLY CONTROLLED TUM    | Encodes a prote            | 3_5670912    | 4.2  | promoter          |
| AT5G05810 | (ATL43)                           | ATL43; FUNCT               | 5_1747980    | 4.19 | exon              |
| AT3G25860 | (LTA2)                            | Nuclear encode             | 3_9462879    | 4.19 | downstream        |
| AT1G11650 | (RBP45B)                          | Encodes an RN              | 1_3914685    | 4.19 | promoter          |
| AT5G54510 | DWARF IN LIGHT 1 (DFL1)           | Encodes an IA <sup>Δ</sup> | 5_22136618   | 4.19 | proximal promoter |
| AT3G56700 | FATTY ACID REDUCTASE 6 (FAR6)     | Encodes a fatty            | 3_21002249   | 4.19 | promoter          |
| AT2G44180 | METHIONINE AMINOPEPTIDASE 2A (MA  | Encodes a MAF              | 2_18271975   | 4.19 | promoter          |
| AT3G50845 | na                                | Protein of unkn            | 3_18902158   | 4.19 | proximal promoter |
| AT3G50860 | na                                | Clathrin adaptor           | 3_18902158   | 4.19 | five_prime_UTR    |
| AT3G50850 | na                                | Putative methyl            | 3_18902158   | 4.19 | promoter          |
| AT2G42450 | na                                | alpha/beta-Hydr            | 2_17676041   | 4.19 | proximal promoter |
| AT1G11640 | na                                | pre-tRNA; tRNA             | 1_3914685    | 4.19 | exon              |
| AT1G49210 | na                                | RING/U-box suj             | 1_18201737   | 4.19 | promoter          |
| AT1G63170 | na                                | Zinc finger, C3F           | 1_23425353   | 4.19 | five_prime_UTR    |
| AT2G25625 | na                                | unknown protei             | 2_10906195   | 4.19 | promoter          |
| AT2G41400 | na                                | Pollen Ole e 1             | 2_17260954   | 4.19 | intergenic        |
| AT3G25870 | na                                | unknown protei             | 3_9462879    | 4.19 | intergenic        |
| AT3G53190 | na                                | Pectin lyase-like          | 3_19716065   | 4.19 | intron            |
| AT4G03405 | na                                | pre-tRNA; tRNA             | 4_1501657    | 4.19 | five_prime_UTR    |
| AT4G03410 | na                                | Peroxisomal me             | 4_1501657    | 4.19 | five_prime_UTR    |
| AT4G11970 | na                                | YTH family prot            | 4_7180292    | 4.19 | promoter          |
| AT4G32760 | na                                | ENTH/VHS/GA'               | 4_15798514   | 4.19 | proximal promoter |
| AT4G25550 | na                                | Cleavage/polya             | 4_13048347   | 4.19 | promoter          |
| AT4G32750 | na                                | unknown protei             | 4_15798514   | 4.19 | promoter          |
| AT5G05800 | na                                | unknown protei             | 5_1747980    | 4.19 | proximal promoter |
| AT5G20885 | na                                | RING/U-box suj             | 5_7085232    | 4.19 | promoter          |
| AT4G01250 | (WRKY22)                          | AtWRKY22 is a              | 4_524123     | 4.18 | exon              |
| AT5G56870 | BETA-GALACTOSIDASE 4 (BGAL4)      | beta-galactosid            | 5_23008678   | 4.18 | downstream        |
| AT2G31081 | CLAVATA3/ESR-RELATED 4 (CLE4)     | Member of a lar            | 2_13233762   | 4.18 | intergenic        |
| AT5G61420 | MYB DOMAIN PROTEIN 28 (MYB28)     | Encodes a nucl             | 5_24696658   | 4.18 | intergenic        |

|           |                                    |                              |      |                   |
|-----------|------------------------------------|------------------------------|------|-------------------|
| AT3G09595 | na                                 | pre-tRNA; tRNA 3_2946345     | 4.18 | proximal promoter |
| AT3G58193 | na                                 | snoRNA; snoR1 3_21554854     | 4.18 | intergenic        |
| AT5G53590 | na                                 | SAUR-like auxin 5_21769908   | 4.18 | proximal promoter |
| AT3G02500 | na                                 | unknown proteir 3_518528     | 4.18 | proximal promoter |
| AT3G55390 | na                                 | Uncharacterise 3_20534707    | 4.18 | five_prime_UTR    |
| AT1G66260 | na                                 | RNA-binding (R 1_24698520    | 4.18 | intron            |
| AT3G62050 | na                                 | Putative endon 3_22978107    | 4.18 | promoter          |
| AT5G56880 | na                                 | unknown proteir 5_23008678   | 4.18 | intergenic        |
| AT5G58787 | na                                 | RING/U-box suj 5_23742349    | 4.18 | promoter          |
| AT5G58784 | na                                 | Undecaprenyl p 5_23742349    | 4.18 | proximal promoter |
| AT5G67050 | na                                 | alpha/beta-Hydr 5_26762681   | 4.18 | proximal promoter |
| AT3G09600 | REVEILLE 8 (RVE8)                  | Encodes a MYE 3_2946345      | 4.18 | promoter          |
| AT1G13280 | ALLENE OXIDE CYCLASE 4 (AOC4)      | Encodes allene 1_4547447     | 4.17 | promoter          |
| AT3G55360 | ECERIFERUM 10 (CER10)              | Enoyl-CoA redu 3_20522973    | 4.17 | five_prime_UTR    |
| AT1G79000 | HISTONE ACETYLTRANSFERASE OF TH    | Homologous to 1_29724887     | 4.17 | promoter          |
| AT3G01100 | HYPOTHETICAL PROTEIN 1 (HYP1)      | unknown proteir 3_38922      | 4.17 | promoter          |
| AT4G22880 | LEUCOANTHOCYANIDIN DIOXYGENASE1    | encodes leucoa 4_12006423    | 4.17 | promoter          |
| AT3G01120 | METHIONINE OVERACCUMULATION 1 (M   | encodes a cyste 3_38922      | 4.17 | three_prime_UTR   |
| AT3G06490 | MYB DOMAIN PROTEIN 108 (MYB108)    | putative transcr 3_2000504   | 4.17 | proximal promoter |
| AT1G24600 | na                                 | unknown proteir 1_8719494    | 4.17 | proximal promoter |
| AT4G14135 | na                                 | Pseudogene of 4_8140149      | 4.17 | proximal promoter |
| AT3G02335 | na                                 | pre-tRNA; tRNA 3_476792      | 4.17 | promoter          |
| AT1G26090 | na                                 | P-loop containir 1_9020356   | 4.17 | promoter          |
| AT1G79010 | na                                 | Alpha-helical fei 1_29724887 | 4.17 | three_prime_UTR   |
| AT2G39690 | na                                 | Protein of unkn 2_16540783   | 4.17 | promoter          |
| AT1G27190 | na                                 | Leucine-rich re 1_9449332    | 4.17 | proximal promoter |
| AT1G27200 | na                                 | CONTAINS Inte 1_9449332      | 4.17 | downstream        |
| AT3G47630 | na                                 | CONTAINS Inte 3_17562856     | 4.17 | downstream        |
| AT3G60957 | na                                 | pseudogene of 3_22535658     | 4.17 | downstream        |
| AT3G60960 | na                                 | Tetratricopeptid 3_22535658  | 4.17 | promoter          |
| AT4G01590 | na                                 | unknown proteir 4_690534     | 4.17 | promoter          |
| AT4G01593 | na                                 | Potential natura 4_690534    | 4.17 | promoter          |
| AT4G01595 | na                                 | Protein kinase s 4_690534    | 4.17 | downstream        |
| AT5G37540 | na                                 | Eukaryotic aspa 5_14916059   | 4.17 | intergenic        |
| AT5G51260 | na                                 | HAD superfamil 5_20833862    | 4.17 | promoter          |
| AT3G58840 | PEROXISOMAL AND MITOCHONDRIAL I    | Encodes PERO 3_21758892      | 4.17 | promoter          |
| AT3G58780 | SHATTERPROOF 1 (SHP1)              | One of two gen 3_21737402    | 4.17 | proximal promoter |
| AT3G01680 | SIEVE-ELEMENT-OCCLUSION-RELATE     | Encodes a prot 3_251786      | 4.17 | promoter          |
| AT5G21990 | TETRATRICOPEPTIDE REPEAT 7 (TPR7)  | Encodes one of 5_7269769     | 4.17 | intergenic        |
| AT5G62850 | VEGETATIVE CELL EXPRESSED1 (AtVE   | Encodes a prot 5_25231934    | 4.17 | promoter          |
| AT2G44610 | (RAB6A)                            | Encodes a GTP 2_18414175     | 4.16 | promoter          |
| AT4G15920 | (SWEET17)                          | Nodulin MtN3 fe 4_9031245    | 4.16 | intron            |
| AT1G31230 | ASPARTATE KINASE-HOMOSERINE DEI    | Encodes a bifur 1_11163998   | 4.16 | proximal promoter |
| AT1G51140 | FLOWERING BHLH 3 (FBH3)            | Encodes a basi 1_18945830    | 4.16 | promoter          |
| AT4G31877 | MICRORNA156C (MIR156C)             | Encodes a micr 4_15417646    | 4.16 | proximal promoter |
| AT2G44620 | MITOCHONDRIAL ACYL CARRIER PRO1    | Encodes a merr 2_18414175    | 4.16 | promoter          |
| AT5G01340 | MITOCHONDRIAL SUCCINATE-FUMARA     | Mitochondrial st 5_142821    | 4.16 | downstream        |
| AT1G60783 | na                                 | unknown proteir 1_22377693   | 4.16 | intergenic        |
| AT3G14240 | na                                 | Subtilase family 3_4745002   | 4.16 | proximal promoter |
| AT1G31240 | na                                 | Bromodomain tr 1_11163998    | 4.16 | three_prime_UTR   |
| AT1G03370 | na                                 | C2 calcium/lipid 1_830525    | 4.16 | promoter          |
| AT1G75400 | na                                 | RING/U-box suj 1_28295953    | 4.16 | proximal promoter |
| AT3G48550 | na                                 | BEST Arabidop: 3_17998445    | 4.16 | intergenic        |
| AT3G54880 | na                                 | unknown proteir 3_20338676   | 4.16 | promoter          |
| AT3G55646 | na                                 | unknown proteir 3_20644014   | 4.16 | proximal promoter |
| AT3G61950 | na                                 | basic helix-loop 3_22941575  | 4.16 | downstream        |
| AT3G61960 | na                                 | Protein kinase s 3_22941575  | 4.16 | downstream        |
| AT4G20290 | na                                 | unknown proteir 4_10955335   | 4.16 | exon              |
| AT4G20300 | na                                 | Protein of unkn 4_10955335   | 4.16 | promoter          |
| AT4G26960 | na                                 | unknown proteir 4_13539582   | 4.16 | intron            |
| AT4G26965 | na                                 | NADH:ubiquinoi 4_13539582    | 4.16 | promoter          |
| AT4G35320 | na                                 | unknown proteir 4_16806683   | 4.16 | promoter          |
| AT3G54890 | PHOTOSYSTEM I LIGHT HARVESTING C   | Encodes a com 3_20338676     | 4.16 | intergenic        |
| AT2G36960 | TSL-KINASE INTERACTING PROTEIN 1 ( | Arabidopsis thal 2_15522429  | 4.16 | promoter          |
| AT1G07130 | (STN1)                             | Encodes a prot 1_2188437     | 4.15 | three_prime_UTR   |
| AT1G58440 | (XF1)                              | Encodes a puta 1_21717415    | 4.15 | promoter          |
| AT3G48190 | ATAXIA-TELANGIECTASIA MUTATED (A   | Encodes a hom 3_17801206     | 4.15 | intron            |
| AT2G37300 | ATP-BINDING CASSETTE 116 (ABC116)  | unknown proteir 2_15664530   | 4.15 | intron            |
| AT3G06650 | ATP-CITRATE LYASE B-1 (ACLB-1)     | One of the two 3_2083296     | 4.15 | promoter          |
| AT4G24510 | ECERIFERUM 2 (CER2)                | Involved in C28 4_12661824   | 4.15 | exon              |
| AT2G30200 | EMBRYO DEFECTIVE 3147 (EMB3147)    | catalytic;transf 2_12885746  | 4.15 | intron            |
| AT3G43270 | na                                 | Plant invertase/ 3_15226602  | 4.15 | proximal promoter |
| AT3G66652 | na                                 | fp1 motif-contai 3_2083296   | 4.15 | promoter          |
| AT4G23432 | na                                 | This gene encod 4_12233369   | 4.15 | exon              |
| AT1G02750 | na                                 | Drought-respon 1_602393      | 4.15 | promoter          |
| AT1G06840 | na                                 | Leucine-rich re 1_2103388    | 4.15 | five_prime_UTR    |
| AT1G07128 | na                                 | Potential natura 1_2188437   | 4.15 | promoter          |
| AT3G13980 | na                                 | unknown proteir 3_4623450    | 4.15 | intergenic        |
| AT3G15220 | na                                 | Protein kinase s 3_5132479   | 4.15 | promoter          |
| AT3G61930 | na                                 | unknown proteir 3_22934147   | 4.15 | proximal promoter |
| AT3G63270 | na                                 | CONTAINS Inte 3_23377576     | 4.15 | promoter          |
| AT5G03380 | na                                 | Heavy metal tra 5_831071     | 4.15 | intergenic        |
| AT5G54064 | na                                 | pseudogene, sir 5_21940017   | 4.15 | promoter          |
| AT1G30380 | PHOTOSYSTEM I SUBUNIT K (PSAK)     | Encodes subun 1_10722067     | 4.15 | promoter          |
| AT2G45640 | SIN3 ASSOCIATED POLYPEPTIDE P18 (  | Involved in the r 2_18801823 | 4.15 | promoter          |
| AT1G10760 | STARCH EXCESS 1 (SEX1)             | Encodes an &#1 1_3590671     | 4.15 | intron            |
| AT1G24460 | TGN-LOCALIZED SYP41 INTERACTING    | Encodes a nove 1_8665813     | 4.15 | promoter          |
| AT1G25280 | TUBBY LIKE PROTEIN 10 (TLP10)      | Member of TLP 1_8863813      | 4.15 | five_prime_UTR    |
| AT1G75540 | B-BOX DOMAIN PROTEIN 21 (BBX21)    | Encodes a B-bc 1_28363274    | 4.14 | proximal promoter |
| AT4G19230 | CYTOCHROME P450, FAMILY 707, SUBF  | Encodes a prot 4_10521248    | 4.14 | promoter          |
| AT2G21330 | FRUCTOSE-BISPHOSPHATE ALDOLASE1    | fructose-bispho: 2_9130640   | 4.14 | promoter          |
| AT2G46550 | na                                 | unknown proteir 2_19114274   | 4.14 | promoter          |
| AT3G10915 | na                                 | Reticulon family 3_3415798   | 4.14 | downstream        |
| AT5G39570 | na                                 | FUNCTIONS IN 5_15843893      | 4.14 | promoter          |

|           |                                     |                              |      |                   |
|-----------|-------------------------------------|------------------------------|------|-------------------|
| AT2G30380 | na                                  | CONTAINS Inte 2_12946551     | 4.14 | proximal promoter |
| AT1G59860 | na                                  | HSP20-like chai 1_22031402   | 4.14 | promoter          |
| AT2G03667 | na                                  | Asparagine syn 2_1114049     | 4.14 | promoter          |
| AT2G19340 | na                                  | Oligosaccharyltr 2_8375992   | 4.14 | promoter          |
| AT3G02250 | na                                  | O-fucosyltransfr 3_429771    | 4.14 | proximal promoter |
| AT2G03660 | na                                  | pre-tRNA; tRNA 2_1114049     | 4.14 | exon              |
| AT2G36220 | na                                  | unknown proteir 2_15189878   | 4.14 | proximal promoter |
| AT3G10910 | na                                  | RING/U-box suq 3_3414990     | 4.14 | proximal promoter |
| AT3G50130 | na                                  | Plant protein of 3_18589844  | 4.14 | exon              |
| AT4G08910 | na                                  | unknown proteir 4_5710913    | 4.14 | proximal promoter |
| AT4G09890 | na                                  | Protein of unknc 4_6218000   | 4.14 | promoter          |
| AT5G35735 | na                                  | Auxin-responsiv 5_13902927   | 4.14 | exon              |
| AT5G61220 | na                                  | LYR family of Fr 5_24627085  | 4.14 | promoter          |
| AT5G65360 | na                                  | Histone superfa 5_26120803   | 4.14 | promoter          |
| AT3G45980 | (HTB9)                              | Encodes a histc 3_16898112   | 4.13 | promoter          |
| AT1G62960 | ACC SYNTHASE 10 (ACS10)             | Encodes an am 1_23320408     | 4.13 | promoter          |
| AT3G50070 | CYCLIN D3;3 (CYCD3;3)               | Encode CYCD3 3_18567181      | 4.13 | promoter          |
| AT3G45970 | EXPANSIN-LIKE A1 (EXLA1)            | member of EXP 3_16898112     | 4.13 | intergenic        |
| AT5G22830 | MAGNESIUM (MG) TRANSPORTER 10 (I    | Transmembran 5_7627082       | 4.13 | proximal promoter |
| AT3G03070 | na                                  | NADH-ubiquino 3_696034       | 4.13 | intergenic        |
| AT3G58700 | na                                  | Ribosomal L5P 3_21711468     | 4.13 | promoter          |
| AT3G58690 | na                                  | Protein kinase s 3_21711468  | 4.13 | downstream        |
| AT4G22980 | na                                  | FUNCTIONS IN 4_12047679      | 4.13 | proximal promoter |
| AT1G33760 | na                                  | encodes a mem 1_12239433     | 4.13 | intergenic        |
| AT1G58420 | na                                  | Uncharacterisek 1_21707297   | 4.13 | promoter          |
| AT2G16290 | na                                  | CONTAINS Inte 2_7056317      | 4.13 | intergenic        |
| AT3G09180 | na                                  | CONTAINS Inte 3_2819155      | 4.13 | five_prime_UTR    |
| AT2G39980 | na                                  | HXXXD-type ac 2_16692501     | 4.13 | proximal promoter |
| AT3G47070 | na                                  | LOCATED IN: tl 3_17337814    | 4.13 | promoter          |
| AT3G47080 | na                                  | Tetratricopeptid 3_17337814  | 4.13 | intergenic        |
| AT3G54910 | na                                  | RNI-like superfa 3_20345027  | 4.13 | promoter          |
| AT3G60110 | na                                  | DNA-binding br 3_22197605    | 4.13 | promoter          |
| AT4G00530 | na                                  | unknown proteir 4_233877     | 4.13 | promoter          |
| AT4G13710 | na                                  | Pectin lyase-like 4_7964404  | 4.13 | intron            |
| AT4G39420 | na                                  | unknown proteir 4_18339172   | 4.13 | promoter          |
| AT5G14880 | na                                  | Potassium trans 5_4812859    | 4.13 | proximal promoter |
| AT5G22820 | na                                  | ARM repeat suq 5_7627082     | 4.13 | promoter          |
| AT5G49950 | na                                  | alpha/beta-Hydr 5_20323907   | 4.13 | promoter          |
| AT5G49960 | na                                  | unknown proteir 5_20323907   | 4.13 | downstream        |
| AT5G56290 | PEROXIN 5 (PEX5)                    | Encodes the pe 5_22792284    | 4.13 | downstream        |
| AT3G54920 | POWDERY MILDEW RESISTANT 6 (PMR     | Powdery mildew 3_20345027    | 4.13 | promoter          |
| AT2G40340 | (DREB2C)                            | Encodes a merr 2_16850618    | 4.12 | promoter          |
| AT4G35450 | ANKYRIN REPEAT-CONTAINING PROTE     | Involved in tarq 4_16839450  | 4.12 | promoter          |
| AT3G63310 | BRZ-INSENSITIVE-LONG HYPOCOTYLS     | Mediates cell el 3_23389105  | 4.12 | promoter          |
| AT4G35440 | CHLORIDE CHANNEL E (CLC-E)          | Enclodes a choi 4_16839450   | 4.12 | promoter          |
| AT3G13920 | EUKARYOTIC TRANSLATION INITIATION   | eukaryotic trans 3_4595750   | 4.12 | proximal promoter |
| AT1G01580 | FERRIC REDUCTION OXIDASE 2 (FRO2)   | Encodes the lov 1_210729     | 4.12 | intron            |
| AT5G48930 | HYDROXYCINNAMOYL-COA SHIKIMATE      | At5g48930 has 5_19838256     | 4.12 | promoter          |
| AT4G18230 | na                                  | FUNCTIONS IN 4_10081972      | 4.12 | promoter          |
| AT1G35180 | na                                  | TRAM, LAG1 ar 1_12878826     | 4.12 | promoter          |
| AT1G30720 | na                                  | FAD-binding Be 1_10897769    | 4.12 | promoter          |
| AT3G13930 | na                                  | Dihydrolipoamic 3_4595750    | 4.12 | promoter          |
| AT3G19520 | na                                  | Protein of unknc 3_6772573   | 4.12 | promoter          |
| AT3G44570 | na                                  | Arabidopsis retr 3_16158383  | 4.12 | promoter          |
| AT3G23840 | na                                  | HXXXD-type ac 3_8609658      | 4.12 | proximal promoter |
| AT4G36925 | na                                  | unknown proteir 4_17407947   | 4.12 | intergenic        |
| AT4G28100 | na                                  | unknown proteir 4_13965946   | 4.12 | intron            |
| AT5G44570 | na                                  | unknown proteir 5_17966779   | 4.12 | intergenic        |
| AT5G44572 | na                                  | unknown proteir 5_17966779   | 4.12 | proximal promoter |
| AT5G58340 | na                                  | myb-like HTH tr 5_23584649   | 4.12 | intron            |
| AT4G18240 | STARCH SYNTHASE 4 (SS4)             | starch synthase 4_10081972   | 4.12 | promoter          |
| AT5G58350 | WITH NO LYSINE (K) KINASE 4 (WNK4)  | Encodes a merr 5_23584649    | 4.12 | promoter          |
| AT3G02830 | ZINC FINGER PROTEIN 1 (ZFN1)        | Encodes a zinc 3_613638      | 4.12 | promoter          |
| AT5G43630 | (TZP)                               | Encodes a zinc 5_17525007    | 4.11 | proximal promoter |
| AT1G33980 | (UPF3)                              | Involved in mRT 1_12351438   | 4.11 | promoter          |
| AT3G10740 | ALPHA-L-ARABINOFURANOSIDASE 1 (A    | Encodes a bifur 3_3366597    | 4.11 | proximal promoter |
| AT4G25960 | ATP-BINDING CASSETTE B2 (ABCB2)     | P-glycoprotein 2 4_13179012  | 4.11 | intron            |
| AT1G55350 | DEFECTIVE KERNEL 1 (DEK1)           | Similar to maize 1_20665137  | 4.11 | promoter          |
| AT4G00850 | GRF1-INTERACTING FACTOR 3 (GIF3)    | Arabidopsis thal 4_357393    | 4.11 | promoter          |
| AT3G20810 | JUMONJI DOMAIN CONTAINING 5 (JM.JI  | JMJD5 encodes 3_7278665      | 4.11 | intergenic        |
| AT3G10745 | MICRORNA158A (MIR158A)              | Encodes a micr 3_3366597     | 4.11 | promoter          |
| AT5G55970 | na                                  | RING/U-box suq 5_22665424    | 4.11 | proximal promoter |
| AT1G70750 | na                                  | Protein of unknc 1_26684024  | 4.11 | proximal promoter |
| AT3G27328 | na                                  | unknown proteir 3_10111774   | 4.11 | exon              |
| AT4G00840 | na                                  | DHHC-type zinc 4_357393      | 4.11 | promoter          |
| AT4G22290 | na                                  | Ubiquitin-specifi 4_11785823 | 4.11 | promoter          |
| AT2G40935 | na                                  | PLAC8 family pi 2_17082844   | 4.11 | promoter          |
| AT4G39270 | na                                  | Leucine-rich ref 4_18276295  | 4.11 | promoter          |
| AT1G19480 | na                                  | DNA glycosylas 1_6744339     | 4.11 | promoter          |
| AT1G33970 | na                                  | P-loop containir 1_12351438  | 4.11 | promoter          |
| AT1G61450 | na                                  | unknown proteir 1_22673046   | 4.11 | promoter          |
| AT2G17240 | na                                  | unknown proteir 2_7497600    | 4.11 | proximal promoter |
| AT1G06640 | na                                  | encodes a prote 1_2034132    | 4.11 | downstream        |
| AT1G06645 | na                                  | 2-oxoglutarate ( 1_2034132   | 4.11 | promoter          |
| AT2G41820 | na                                  | Leucine-rich ref 2_17445216  | 4.11 | proximal promoter |
| AT3G20820 | na                                  | Leucine-rich ref 3_7278665   | 4.11 | proximal promoter |
| AT4G13100 | na                                  | RING/U-box suq 4_7638583     | 4.11 | intron            |
| AT4G14342 | na                                  | Splicing factor 3 4_8255649  | 4.11 | promoter          |
| AT4G14345 | na                                  | pre-tRNA; tRNA 4_8255649     | 4.11 | promoter          |
| AT4G25170 | na                                  | Uncharacterisek 4_12909566   | 4.11 | promoter          |
| AT5G20736 | na                                  | This gene encod 5_7023368    | 4.11 | intergenic        |
| AT5G60410 | (SIZ1)                              | Encodes a plar 5_24301390    | 4.1  | intergenic        |
| AT4G17640 | CASEIN KINASE II BETA CHAIN 2 (CKB2 | Encodes casein 4_9825127     | 4.1  | promoter          |
| AT2G20190 | CLIP-ASSOCIATED PROTEIN (CLASP)     | Encodes a micr 2_8719102     | 4.1  | promoter          |

|           |                                     |                               |      |                   |
|-----------|-------------------------------------|-------------------------------|------|-------------------|
| AT4G21810 | DERLIN-2.1 (DER2.1)                 | DERLIN-2.1 (Df 4_11577235     | 4.1  | promoter          |
| AT5G62070 | IQ-DOMAIN 23 (IQD23)                | IQ-domain 23 (I 5_24932705    | 4.1  | promoter          |
| AT1G63720 | na                                  | BEST Arabidop: 1_23638038     | 4.1  | proximal promoter |
| AT1G55265 | na                                  | Protein of unknk 1_20617246   | 4.1  | promoter          |
| AT1G67900 | na                                  | Phototropic-resj 1_25470109   | 4.1  | downstream        |
| AT1G67910 | na                                  | unknown proteir 1_25470109    | 4.1  | intergenic        |
| AT4G17620 | na                                  | glycine-rich prot 4_9825127   | 4.1  | downstream        |
| AT1G29950 | na                                  | basic helix-loop 1_10489910   | 4.1  | proximal promoter |
| AT5G59055 | na                                  | pre-tRNA; tRNA 5_23845038     | 4.1  | intergenic        |
| AT5G59060 | na                                  | BEST Arabidop: 5_23845038     | 4.1  | promoter          |
| AT5G59070 | na                                  | UDP-Glycosyltr: 5_23845038    | 4.1  | promoter          |
| AT1G28760 | na                                  | Uncharacterizer 1_10102918    | 4.1  | promoter          |
| AT1G32460 | na                                  | unknown proteir 1_11738140    | 4.1  | five_prime_UTR    |
| AT1G32470 | na                                  | Single hybrid m: 1_11738140   | 4.1  | intergenic        |
| AT1G78260 | na                                  | RNA-binding (R 1_29449780     | 4.1  | intron            |
| AT1G78265 | na                                  | Potential natura 1_29449780   | 4.1  | proximal promoter |
| AT2G28390 | na                                  | SAND family pr: 2_12145732    | 4.1  | proximal promoter |
| AT3G28918 | na                                  | unknown proteir 3_10934870    | 4.1  | intergenic        |
| AT3G56408 | na                                  | Potential natura 3_20921410   | 4.1  | downstream        |
| AT3G56410 | na                                  | Protein of unknk 3_20921410   | 4.1  | promoter          |
| AT5G08520 | na                                  | Duplicated hom 5_2756860      | 4.1  | intron            |
| AT5G25625 | na                                  | pre-tRNA; tRNA 5_8947239      | 4.1  | promoter          |
| AT5G25630 | na                                  | Tetratricopeptid 5_8947239    | 4.1  | intron            |
| AT5G60430 | na                                  | drug transmemt 5_24301390     | 4.1  | promoter          |
| AT1G56010 | NAC DOMAIN CONTAINING PROTEIN 1     | Encodes a trans 1_20949985    | 4.1  | proximal promoter |
| AT1G78270 | UDP-GLUCOSYL TRANSFERASE 85A4 (     | UDP-glucosyl tr 1_29449780    | 4.1  | intergenic        |
| AT2G33540 | C-TERMINAL DOMAIN PHOSPHATASE-L     | C-terminal dom: 2_14209279    | 4.09 | promoter          |
| AT3G23000 | CBL-INTERACTING PROTEIN KINASE 7    | Encodes a serir 3_8170891     | 4.09 | proximal promoter |
| AT4G15560 | CLOROPLASTOS ALTERADOS 1 (CLA1)     | Encodes a prote 4_8883863     | 4.09 | promoter          |
| AT3G11040 | ENDO-BETA-N-ACETYLLUCOSAMINIDA      | Glycosyl hydrol: 3_3459839    | 4.09 | promoter          |
| AT3G17860 | JASMONATE-ZIM-DOMAIN PROTEIN 3 (    | JAZs are direct 3_6118551     | 4.09 | proximal promoter |
| AT3G18850 | LYSOPHOSPHATIDYL ACYLTRANSFER       | lysophosphatid: 3_6499170     | 4.09 | intergenic        |
| AT5G10950 | na                                  | Tudor/PWWP/ln 5_3461808       | 4.09 | promoter          |
| AT2G25690 | na                                  | Protein of unknk 2_10942351   | 4.09 | promoter          |
| AT1G03140 | na                                  | splicing factor P 1_754321    | 4.09 | downstream        |
| AT1G06480 | na                                  | pre-tRNA; tRNA 1_1978184      | 4.09 | downstream        |
| AT2G02910 | na                                  | Protein of unknk 2_849806     | 4.09 | promoter          |
| AT2G44670 | na                                  | Protein of unknk 2_18424676   | 4.09 | proximal promoter |
| AT3G17850 | na                                  | Protein kinase s 3_6116877    | 4.09 | promoter          |
| AT3G18845 | na                                  | Encodes a Prot: 3_6499170     | 4.09 | promoter          |
| AT3G27110 | na                                  | Peptidase famih 3_9997836     | 4.09 | promoter          |
| AT3G51390 | na                                  | DHHC-type zinc 3_19075430     | 4.09 | promoter          |
| AT4G21445 | na                                  | unknown proteir 4_11425928    | 4.09 | downstream        |
| AT4G21450 | na                                  | PapD-like super 4_11425928    | 4.09 | promoter          |
| AT4G26375 | na                                  | pre-tRNA; tRNA 4_13336335     | 4.09 | downstream        |
| AT4G32285 | na                                  | ENTH/ANTH/Vf: 4_15585636      | 4.09 | promoter          |
| AT1G03130 | PHOTOSYSTEM I SUBUNIT D-2 (PSAD-2   | Encodes a prot: 1_754321      | 4.09 | promoter          |
| AT1G03780 | TARGETING PROTEIN FOR XKLP2 (TPX    | Homolog of vert 1_952066      | 4.09 | promoter          |
| AT4G24040 | TREHALASE 1 (TRE1)                  | Encodes a treh: 4_12489118    | 4.09 | exon              |
| AT4G14622 | CONSERVED PEPTIDE UPSTREAM OPE      | Upstream open 4_8389281       | 4.08 | three_prime_UTR   |
| AT4G37410 | CYTOCHROME P450, FAMILY 81, SUBF    | member of CYP 4_17588173      | 4.08 | proximal promoter |
| AT3G11400 | EUKARYOTIC TRANSLATION INITIATION   | One of the 2 qe 3_3578309     | 4.08 | promoter          |
| AT2G37090 | IRREGULAR XYLEM 9 (IRX9)            | The IRX9 gene 2_15588336      | 4.08 | exon              |
| AT3G01820 | na                                  | P-loop containir 3_293218     | 4.08 | intergenic        |
| AT1G14590 | na                                  | Nucleotide-diph 1_4996098     | 4.08 | intergenic        |
| AT2G22760 | na                                  | basic helix-loop 2_9675958    | 4.08 | proximal promoter |
| AT3G11402 | na                                  | Cysteine/Histidi 3_3578309    | 4.08 | downstream        |
| AT4G14620 | na                                  | Protein of unknk 4_8389281    | 4.08 | three_prime_UTR   |
| AT5G41040 | na                                  | Encodes a ferul 5_16431336    | 4.08 | promoter          |
| AT5G10690 | na                                  | pentatricopeptic 5_3377606    | 4.08 | promoter          |
| AT5G10695 | na                                  | unknown proteir 5_3377606     | 4.08 | promoter          |
| AT5G10700 | na                                  | Peptidyl-tRNA h 5_3377606     | 4.08 | intergenic        |
| AT5G32450 | na                                  | RNA binding (R 5_12079487     | 4.08 | promoter          |
| AT5G53460 | NADH-DEPENDENT GLUTAMATE SYNTI      | NADH-depende 5_21697766       | 4.08 | proximal promoter |
| AT3G63180 | TIC-LIKE (TKL)                      | TIC-like (TKL); f: 3_23341128 | 4.08 | proximal promoter |
| AT5G04740 | ACT DOMAIN REPEATS 12 (ACR12)       | Encodes a ACT 5_1372048       | 4.07 | proximal promoter |
| AT1G30330 | AUXIN RESPONSE FACTOR 6 (ARF6)      | Encodes a merr 1_10691857     | 4.07 | proximal promoter |
| AT5G16260 | EARLY FLOWERING 9 (ELF9)            | Encodes a RNA 5_5316186       | 4.07 | intergenic        |
| AT1G78300 | GENERAL REGULATORY FACTOR 2 (Gf     | G-box binding f: 1_29461339   | 4.07 | promoter          |
| AT5G27670 | HISTONE H2A 7 (HTA7)                | Encodes HTA7, 5_9793555       | 4.07 | promoter          |
| AT2G21050 | LIKE AUXIN RESISTANT 2 (LAX2)       | Encodes LAX2 2_9035571        | 4.07 | exon              |
| AT5G15580 | LONGIFOLIA1 (LNG1)                  | Encodes LONG 5_5072846        | 4.07 | promoter          |
| AT4G37910 | MITOCHONDRIAL HEAT SHOCK PROTE      | mitochondrial he 4_17828306   | 4.07 | promoter          |
| AT5G14370 | na                                  | CCT motif famih 5_4633757     | 4.07 | promoter          |
| AT5G55896 | na                                  | transposable elk 5_22633422   | 4.07 | promoter          |
| AT5G27660 | na                                  | Trypsin family p 5_9793555    | 4.07 | proximal promoter |
| AT2G40230 | na                                  | HXXXD-type ac 2_16803381      | 4.07 | exon              |
| AT2G47870 | na                                  | Thioredoxin sup 2_19602526    | 4.07 | proximal promoter |
| AT4G29780 | na                                  | unknown proteir 4_14578516    | 4.07 | proximal promoter |
| AT5G04750 | na                                  | F1F0-ATPase ir 5_1372048      | 4.07 | promoter          |
| AT4G35110 | na                                  | Arabidopsis phc 4_16715132    | 4.07 | promoter          |
| AT4G37920 | na                                  | unknown proteir 4_17828306    | 4.07 | downstream        |
| AT5G15581 | na                                  | unknown proteir 5_5072846     | 4.07 | intergenic        |
| AT5G59020 | na                                  | Protein of unknk 5_23830621   | 4.07 | promoter          |
| AT5G61345 | na                                  | pre-tRNA; tRNA 5_24667152     | 4.07 | promoter          |
| AT5G64600 | na                                  | O-fucosyltransf 5_25824956    | 4.07 | promoter          |
| AT2G22860 | PHYTOSULFOKINE 2 PRECURSOR (PSI     | Phytosulfokine ; 2_9737157    | 4.07 | promoter          |
| AT2G02850 | PLANTACYANIN (ARPN)                 | Encodes planta 2_827834       | 4.07 | promoter          |
| AT3G08730 | PROTEIN-SERINE KINASE 1 (PK1)       | Encodes a prote 3_2654243     | 4.07 | promoter          |
| AT5G27680 | RECO HELICASE SIM (RECSIM)          | DNA helicase 5_9793555        | 4.07 | intergenic        |
| AT5G16270 | SISTER CHROMATID COHESION 1 PRO     | Encodes a SCC 5_5316186       | 4.07 | promoter          |
| AT2G02860 | SUCROSE TRANSPORTER 2 (SUT2)        | encodes a suc: 2_827834       | 4.07 | intergenic        |
| AT3G26280 | CYTOCHROME P450, FAMILY 71, SUBF    | cytochrome P4f 3_9632075      | 4.06 | promoter          |
| AT1G51950 | INDOLE-3-ACETIC ACID INDUCIBLE 18 ( | indole-3-acetic ; 1_19302758  | 4.06 | proximal promoter |



|           |                                    |                   |              |      |                   |
|-----------|------------------------------------|-------------------|--------------|------|-------------------|
| AT5G15630 | IRREGULAR XYLEM 6 (IRX6)           | Encodes a mem     | 5_5086856    | 4.06 | downstream        |
| AT5G12330 | LATERAL ROOT PRIMORDIUM 1 (LRP1)   | A member of S     | 5_3990043    | 4.06 | promoter          |
| AT2G39440 | na                                 | CONTAINS Inte     | 2_16469918   | 4.06 | promoter          |
| AT3G49160 | na                                 | Expression of tr  | 3_18224931   | 4.06 | promoter          |
| AT5G15640 | na                                 | Mitochondrial st  | 5_5086856    | 4.06 | proximal promoter |
| AT1G29240 | na                                 | Protein of unknc  | 1_10219844   | 4.06 | five_prime_UTR    |
| AT1G64610 | na                                 | Transducin/WD     | 1_24003210   | 4.06 | proximal promoter |
| AT1G04680 | na                                 | Pectin lyase-like | 1_1307969    | 4.06 | promoter          |
| AT1G06890 | na                                 | Nucleotide/sugc   | 1_2114693    | 4.06 | promoter          |
| AT2G17670 | na                                 | Tetrapeptide      | 2_7674183    | 4.06 | promoter          |
| AT2G19940 | na                                 | oxidoreductase:   | 2_8612815    | 4.06 | promoter          |
| AT2G30930 | na                                 | unknown protei    | 2_13162124   | 4.06 | promoter          |
| AT2G42420 | na                                 | pre-tRNA; tRNA    | 2_17660774   | 4.06 | promoter          |
| AT3G27570 | na                                 | Sucrase/ferredc   | 3_10216834   | 4.06 | promoter          |
| AT4G15790 | na                                 | unknown protei    | 4_8984805    | 4.06 | intergenic        |
| AT4G20830 | na                                 | FAD-binding Be    | 4_1154509    | 4.06 | proximal promoter |
| AT4G35837 | na                                 | This gene encod   | 4_16979924   | 4.06 | intergenic        |
| AT5G53490 | na                                 | thylakoid lumen:  | 5_21725853   | 4.06 | proximal promoter |
| AT5G53500 | na                                 | Transducin/WD     | 5_21725853   | 4.06 | three_prime_UTR   |
| AT1G62720 | NOVEL GENE 1 (NG1)                 | Encodes a PPR     | 1_23227384   | 4.06 | promoter          |
| AT4G15800 | RALF-LIKE 33 (RALFL33)             | Member of a div   | 4_8984805    | 4.06 | promoter          |
| AT1G61380 | S-DOMAIN-1 29 (SD1-29)             | S-domain-1 29     | 1_22649809   | 4.06 | promoter          |
| AT3G61860 | ARGININE/SERINE-RICH SPLICING FAC  | encodes an arg    | 3_22902456   | 4.05 | promoter          |
| AT5G53400 | BOBBER1 (BOB1)                     | Encodes BOBB      | 5_21661326   | 4.05 | promoter          |
| AT3G27530 | GOLGIN CANDIDATE 6 (GC6)           | This gene is pre  | 3_10200089   | 4.05 | promoter          |
| AT5G22880 | HISTONE B2 (HTB2)                  | Encodes a histc   | 5_7652803    | 4.05 | promoter          |
| AT1G64760 | HYPERSENSITIVE TO EXCESS BORON     | O-Glycosyl hydr   | 1_24056462   | 4.05 | promoter          |
| AT2G32210 | na                                 | unknown protei    | 2_13677976   | 4.05 | promoter          |
| AT2G32220 | na                                 | Ribosomal L27ε    | 2_13677976   | 4.05 | proximal promoter |
| AT1G52910 | na                                 | Protein of unknc  | 1_19708078   | 4.05 | five_prime_UTR    |
| AT1G52905 | na                                 | unknown protei    | 1_19708078   | 4.05 | intergenic        |
| AT1G14160 | na                                 | Uncharacterise    | 1_4842412    | 4.05 | proximal promoter |
| AT1G22480 | na                                 | Cupredoxin sup    | 1_7934093    | 4.05 | downstream        |
| AT1G26850 | na                                 | S-adenosyl-L-m    | 1_9304638    | 4.05 | promoter          |
| AT2G15060 | na                                 | transposable el   | 2_6523786    | 4.05 | intergenic        |
| AT1G22470 | na                                 | unknown protei    | 1_7934093    | 4.05 | proximal promoter |
| AT2G41810 | na                                 | FUNCTIONS IN      | 2_17439537   | 4.05 | exon              |
| AT3G26670 | na                                 | Protein of unknc  | 3_9801160    | 4.05 | intron            |
| AT5G10020 | na                                 | Leucine-rich rec  | 5_3132395    | 4.05 | proximal promoter |
| AT1G80460 | NONHOST RESISTANCE TO P. S. PHAS   | Encodes a prot    | 1_30250493   | 4.05 | proximal promoter |
| AT1G48635 | PEROXIN 3 (PEX3)                   | peroxin 3 (PEX    | 1_17983592   | 4.05 | promoter          |
| AT3G46780 | PLASTID TRANSCRIPTIONALLY ACTIVE   | plastid transcri  | 3_17228563   | 4.05 | promoter          |
| AT2G32230 | PROTEINACEOUS RNASE P 1 (PRORP1    | RNase P able tr   | 2_13677976   | 4.05 | intergenic        |
| AT1G48630 | RECEPTOR FOR ACTIVATED C KINASE    | Encodes a prot    | 1_17983592   | 4.05 | promoter          |
| AT4G04900 | ROP-INTERACTIVE CRIB MOTIF-CONTA   | encodes a mem     | 4_2485358    | 4.05 | intergenic        |
| AT1G67265 | ROTUNDIFOLIA LIKE 21 (RTFL21)      | ROTUNDIFOLIA      | 1_25176441   | 4.05 | promoter          |
| AT3G26680 | SENSITIVE TO NITROGEN MUSTARD 1    | involved in a SN  | 3_9801160    | 4.05 | promoter          |
| AT1G68720 | TRNA ARGININE ADENOSINE DEAMINA    | Encodes the ch    | 1_25803513   | 4.05 | proximal promoter |
| AT1G55190 | (PRA7)                             | PRA7; INVOLVI     | 1_20588012   | 4.04 | promoter          |
| AT3G16170 | ACYL ACTIVATING ENZYME 13 (AAE13)  | AMP-dependen      | 3_5475927    | 4.04 | promoter          |
| AT1G29690 | CONSTITUTIVELY ACTIVATED CELL DE   | Encodes a prot    | 1_10382102   | 4.04 | five_prime_UTR    |
| AT5G16820 | HEAT SHOCK FACTOR 3 (HSF3)         | Encodes a puta    | 5_5530136    | 4.04 | promoter          |
| AT1G79480 | na                                 | Carbohydrate-b    | 1_29898405   | 4.04 | exon              |
| AT2G04250 | na                                 | pseudogene, hy    | 2_1467491    | 4.04 | intergenic        |
| AT1G05135 | na                                 | pseudogene of     | 1_1477690    | 4.04 | intron            |
| AT1G77750 | na                                 | Ribosomal prote   | 1_29232133   | 4.04 | proximal promoter |
| AT3G07790 | na                                 | DGCR14-relate     | 3_2487250    | 4.04 | promoter          |
| AT3G24480 | na                                 | Leucine-rich re   | 3_8904570    | 4.04 | proximal promoter |
| AT4G02540 | na                                 | Cysteine/Histidi  | 4_1117091    | 4.04 | promoter          |
| AT5G51795 | na                                 | DNA/RNA-bind      | 5_21044842   | 4.04 | proximal promoter |
| AT5G16810 | na                                 | Protein kinase    | 5_5530136    | 4.04 | promoter          |
| AT5G41890 | na                                 | GDLS-like Lipas   | 5_16767035   | 4.04 | promoter          |
| AT3G07780 | OBERON1 (OBE1)                     | Encodes a nucl    | 3_2487250    | 4.04 | downstream        |
| AT3G29370 | P1R3 (P1R3)                        | Encodes a atyp    | 3_11277871   | 4.04 | proximal promoter |
| AT5G05590 | PHOSPHORIBOSYLANTHRANILATE ISO     | Encodes phosp     | 5_1669335    | 4.04 | proximal promoter |
| AT1G52290 | PROLINE-RICH EXTENSIN-LIKE RECEP   | Encodes a mem     | 1_19472461   | 4.04 | promoter          |
| AT2G26580 | YABBY5 (YAB5)                      | YABBY5 (YAB5      | 2_11309701   | 4.04 | proximal promoter |
| AT4G14720 | (PPD2)                             | PPD2 (and its p   | 4_8435059    | 4.03 | five_prime_UTR    |
| AT5G13790 | AGAMOUS-LIKE 15 (AGL15)            | AGL15 (AGAM       | 5_4448736    | 4.03 | intergenic        |
| AT5G52060 | BCL-2-ASSOCIATED ATHANOGENE 1 (E   | A member of Ar    | 5_21151955   | 4.03 | intergenic        |
| AT3G55610 | DELTA 1-PYRROLINE-5-CARBOXYLATE    | encodes delta     | 1_3_20630172 | 4.03 | proximal promoter |
| AT4G08500 | MAPK/ERK KINASE KINASE 1 (MEKK1)   | Encodes a mem     | 4_5407296    | 4.03 | five_prime_UTR    |
| AT4G36925 | na                                 | unknown protei    | 4_17406279   | 4.03 | intergenic        |
| AT2G42170 | na                                 | Actin family prot | 2_17577673   | 4.03 | promoter          |
| AT3G16780 | na                                 | Ribosomal prote   | 3_5708752    | 4.03 | promoter          |
| AT5G13780 | na                                 | Acyl-CoA N-acy    | 5_4448736    | 4.03 | promoter          |
| AT2G27450 | NITRILASE-LIKE PROTEIN 1 (NLP1)    | Encodes N-cart    | 2_11739685   | 4.03 | five_prime_UTR    |
| AT2G30140 | UDP-GLUCOSYL TRANSFERASE 87A2 (    | Encodes a puta    | 2_12871823   | 4.03 | promoter          |
| AT2G15090 | 3-KETOACYL-COA SYNTHASE 8 (KCS8)   | Encodes KCS8,     | 2_6539911    | 4.02 | proximal promoter |
| AT1G54060 | 6B-INTERACTING PROTEIN 1-LIKE 1 (A | Member of the t   | 1_20180751   | 4.02 | five_prime_UTR    |
| AT1G70410 | BETA CARBONIC ANHYDRASE 4 (BCA4    | Encodes a puta    | 1_26537168   | 4.02 | intron            |
| AT5G63450 | CYTOCHROME P450, FAMILY 94, SUBF   | member of CYP     | 5_25412172   | 4.02 | proximal promoter |
| AT3G02600 | LIPID PHOSPHATE PHOSPHATASE 3 (L   | Encodes phosp     | 3_550632     | 4.02 | promoter          |
| AT5G65970 | MILDEW RESISTANCE LOCUS O 10 (ML   | A member of a     | 1_5_26390472 | 4.02 | promoter          |
| AT3G03790 | na                                 | ankyrin repeat    | f:3_961860   | 4.02 | promoter          |
| AT3G24480 | na                                 | Leucine-rich re   | 3_8900575    | 4.02 | intergenic        |
| AT3G02590 | na                                 | Fatty acid hydr   | 3_550632     | 4.02 | downstream        |
| AT1G03820 | na                                 | unknown protei    | 1_961895     | 4.02 | proximal promoter |
| AT1G21560 | na                                 | unknown protei    | 1_7554512    | 4.02 | promoter          |
| AT2G36980 | na                                 | Tetrapeptide      | 2_15530257   | 4.02 | proximal promoter |
| AT2G46040 | na                                 | ARID/BRIGHT       | 1_2_18938150 | 4.02 | intron            |
| AT1G54050 | na                                 | HSP20-like chaj   | 1_20180751   | 4.02 | promoter          |
| AT2G36970 | na                                 | UDP-Glycosyltr    | 2_15530257   | 4.02 | exon              |
| AT2G42420 | na                                 | pre-tRNA; tRNA    | 2_17659423   | 4.02 | proximal promoter |

|           |                                     |                         |              |      |                   |
|-----------|-------------------------------------|-------------------------|--------------|------|-------------------|
| AT3G57730 | na                                  | Protein kinase s        | 3_21391619   | 4.02 | promoter          |
| AT4G35250 | na                                  | NAD(P)-binding          | 4_16773364   | 4.02 | promoter          |
| AT5G03970 | na                                  | F-box associate         | 5_1073565    | 4.02 | promoter          |
| AT5G57035 | na                                  | U-box domain-c          | 5_23080658   | 4.02 | promoter          |
| AT5G39860 | PACLOBUTRAZOL RESISTANCE1 (PRE      | Encodes PRE1            | 5_15955478   | 4.02 | proximal promoter |
| AT1G59820 | AMINOPHOSPHOLIPID ATPASE 3 (ALA3    | Encodes a phos          | 1_22011159   | 4.01 | promoter          |
| AT4G31590 | CELLULOSE-SYNTHASE-LIKE C5 (CSLC    | encodes a gene          | 4_15312862   | 4.01 | promoter          |
| AT3G25690 | CHLOROPLAST UNUSUAL POSITIONING     | actin binding pr        | 3_9353711    | 4.01 | intron            |
| AT1G56280 | DROUGHT-INDUCED 19 (DI19)           | Encodes a gene          | 1_21075057   | 4.01 | promoter          |
| AT1G03970 | G-BOX BINDING FACTOR 4 (GBF4)       | encodes a basic         | 1_1018042    | 4.01 | promoter          |
| AT1G15080 | LIPID PHOSPHATE PHOSPHATASE 2 (LI   | Encodes phosph          | 1_5189815    | 4.01 | downstream        |
| AT2G37380 | MEMBRANE-ASSOCIATED KINASE REG      | Encodes a merr          | 2_15685318   | 4.01 | proximal promoter |
| AT1G02228 | na                                  | pseudogene of           | 1_434282     | 4.01 | promoter          |
| AT1G32410 | na                                  | Vacuolar protei         | 1_11693711   | 4.01 | promoter          |
| AT3G48380 | na                                  | Peptidase C78,          | 3_17920378   | 4.01 | downstream        |
| AT3G48390 | na                                  | MA3 domain-co           | 3_17920378   | 4.01 | promoter          |
| AT4G17080 | na                                  | Histone H3 K4- $\gamma$ | 4_9600085    | 4.01 | proximal promoter |
| AT1G03960 | na                                  | Calcium-binding         | 1_1018042    | 4.01 | downstream        |
| AT1G14330 | na                                  | Galactose oxid          | 1_4894883    | 4.01 | proximal promoter |
| AT3G06778 | na                                  | Chaperone Dna           | 3_2140770    | 4.01 | intron            |
| AT1G15090 | na                                  | pre-tRNA; tRNA          | 1_5189815    | 4.01 | promoter          |
| AT2G35820 | na                                  | ureidoglycolate         | 2_15051909   | 4.01 | intron            |
| AT2G35830 | na                                  | unknown protei          | 2_15051909   | 4.01 | promoter          |
| AT3G20650 | na                                  | mRNA capping            | 3_7224155    | 4.01 | promoter          |
| AT3G20655 | na                                  | pre-tRNA; tRNA          | 3_7224155    | 4.01 | downstream        |
| AT3G60510 | na                                  | ATP-dependent           | 3_22360225   | 4.01 | promoter          |
| AT4G05040 | na                                  | ankyrin repeat          | f. 4_2578476 | 4.01 | promoter          |
| AT4G05400 | na                                  | copper ion bindi        | 4_2741054    | 4.01 | promoter          |
| AT5G65990 | na                                  | Transmembran            | 5_26394523   | 4.01 | promoter          |
| AT5G66480 | na                                  | unknown protei          | 5_26547126   | 4.01 | promoter          |
| AT5G66490 | na                                  | unknown protei          | 5_26547126   | 4.01 | downstream        |
| AT5G66500 | na                                  | Tetratricopeptid        | 5_26547126   | 4.01 | intergenic        |
| AT3G23590 | REF4-RELATED 1 (RFR1)               | Encodes a prot          | 3_8467507    | 4.01 | five_prime_UTR    |
| AT3G61440 | CYSTEINE SYNTHASE C1 (CYSC1)        | Encodes a cyst          | 3_22735661   | 4    | promoter          |
| AT1G27980 | DIHYDROSPHINGOSINE PHOSPHATE L      | dihydrosphingo          | 1_9748151    | 4    | proximal promoter |
| AT1G19180 | JASMONATE-ZIM-DOMAIN PROTEIN 1 (    | JAZ1 is a nucle         | 1_6621959    | 4    | promoter          |
| AT2G43240 | na                                  | Nucleotide-sug          | 2_17976064   | 4    | promoter          |
| AT3G17640 | na                                  | Leucine-rich re         | 3_6033821    | 4    | intergenic        |
| AT3G49810 | na                                  | ARM repeat sup          | 3_18476974   | 4    | promoter          |
| AT4G28430 | na                                  | Reticulon family        | 4_14059930   | 4    | downstream        |
| AT4G28440 | na                                  | Nucleic acid-bin        | 4_14059930   | 4    | promoter          |
| AT3G16840 | na                                  | P-loop containi         | 3_5743265    | 4    | promoter          |
| AT1G19430 | na                                  | S-adenosyl-L-m          | 1_6728032    | 4    | five_prime_UTR    |
| AT1G73740 | na                                  | UDP-Glycosyltr          | 1_27733987   | 4    | promoter          |
| AT3G27250 | na                                  | unknown protei          | 3_10063068   | 4    | intergenic        |
| AT3G43670 | na                                  | Copper amine c          | 3_15567582   | 4    | intron            |
| AT3G61105 | na                                  | pre-tRNA; tRNA          | 3_22611522   | 4    | downstream        |
| AT4G23870 | na                                  | unknown protei          | 4_12416516   | 4    | intergenic        |
| AT4G23880 | na                                  | unknown protei          | 4_12416516   | 4    | promoter          |
| AT4G26675 | na                                  | pre-tRNA; tRNA          | 4_13454530   | 4    | promoter          |
| AT4G27480 | na                                  | Core-2/l-branch         | 4_13739135   | 4    | promoter          |
| AT1G27970 | NUCLEAR TRANSPORT FACTOR 2B (NT     | Encodes an ort          | 1_9748151    | 4    | intron            |
| AT3G61430 | PLASMA MEMBRANE INTRINSIC PROTE     | a member of the         | 3_22735661   | 4    | intergenic        |
| AT3G06300 | PROLYL 4-HYDROXYLASE 2 (P4H2)       | Encodes a proly         | 3_1907531    | 4    | promoter          |
| AT1G20090 | RHO-RELATED PROTEIN FROM PLANT;     | Member of the f         | 1_6965861    | 4    | proximal promoter |
| AT3G61110 | RIBOSOMAL PROTEIN S27 (RS27A)       | Arabidopsis rib         | 3_22611522   | 4    | promoter          |
| AT1G47490 | RNA-BINDING PROTEIN 47C (RBP47C)    | RNA-binding pr          | 1_17424629   | 4    | promoter          |
| AT1G73805 | SAR DEFICIENT 1 (SARD1)             | Encodes SAR C           | 1_27749463   | 4    | promoter          |
| AT1G34210 | SOMATIC EMBRYOGENESIS RECEPTO       | Plasma membr            | 1_12458687   | 4    | five_prime_UTR    |
| AT1G08470 | STRICTOSIDINE SYNTHASE-LIKE 3 (SSI  | Although this er        | 1_2681090    | 4    | intergenic        |
| AT5G60120 | TARGET OF EARLY ACTIVATION TAGG1    | target of early         | 5_24205547   | 4    | proximal promoter |
| AT3G06290 | YEAST SAC3 HOMOLOG B (SAC3B)        | SAC3/GANP/Ni            | 3_1907531    | 4    | promoter          |
| AT3G17650 | YELLOW STRIPE LIKE 5 (YSL5)         | Arabidopsis th          | 3_6033821    | 4    | promoter          |
| AT2G28560 | (RAD51B)                            | Encodes a prot          | 2_12234322   | 3.99 | intergenic        |
| AT4G36880 | CYSTEINE PROTEINASE 1 (CP1)         | cysteine protein        | 4_17378877   | 3.99 | proximal promoter |
| AT2G32720 | CYTOCHROME B5 ISOFORM B (CB5-B)     | member of Cyto          | 2_13875954   | 3.99 | intergenic        |
| AT2G23180 | CYTOCHROME P450, FAMILY 96, SUBF    | member of CYP           | 2_9874785    | 3.99 | promoter          |
| AT4G36890 | IRREGULAR XYLEM 14 (IRX14)          | The IRX14 gene          | 4_17378877   | 3.99 | intergenic        |
| AT3G06110 | MAPK PHOSPHATASE 2 (MKP2)           | Encodes a nucl          | 3_1842071    | 3.99 | proximal promoter |
| AT3G06490 | MYB DOMAIN PROTEIN 108 (MYB108)     | putative transcr        | 3_2007772    | 3.99 | intergenic        |
| AT3G59490 | na                                  | unknown protei          | 3_21986469   | 3.99 | promoter          |
| AT3G59500 | na                                  | Integral membra         | 3_21986469   | 3.99 | promoter          |
| AT4G29090 | na                                  | Ribonuclease H          | 4_14333301   | 3.99 | promoter          |
| AT5G03660 | na                                  | Family of unkno         | 5_942398     | 3.99 | intergenic        |
| AT5G26960 | na                                  | Galactose oxid          | 5_9484914    | 3.99 | exon              |
| AT3G28040 | na                                  | Leucine-rich rec        | 3_10433980   | 3.99 | proximal promoter |
| AT5G47550 | na                                  | Cystatin/monelli        | 5_19286340   | 3.99 | downstream        |
| AT1G26580 | na                                  | FUNCTIONS IN            | 1_9184532    | 3.99 | promoter          |
| AT2G32710 | na                                  | Kip-related prot        | 2_13875954   | 3.99 | downstream        |
| AT1G26940 | na                                  | Cyclophilin-like        | 1_9344927    | 3.99 | intron            |
| AT3G06105 | na                                  | pre-tRNA; tRNA          | 3_1842071    | 3.99 | intergenic        |
| AT3G18952 | na                                  | pre-tRNA; tRNA          | 3_6540857    | 3.99 | downstream        |
| AT3G53965 | na                                  | pre-tRNA; tRNA          | 3_19985016   | 3.99 | downstream        |
| AT5G24650 | na                                  | Mitochondrial ir        | 5_8437511    | 3.99 | exon              |
| AT3G06100 | NOD26-LIKE INTRINSIC PROTEIN 7;1 (N | Encodes NIP7;1          | 3_1842071    | 3.99 | exon              |
| AT2G42500 | PROTEIN PHOSPHATASE 2A-3 (PP2A-3)   | Encodes one of          | 2_17701484   | 3.99 | promoter          |
| AT3G55000 | TONNEAU 1A (TON1A)                  | Encodes a prot          | 3_20380179   | 3.99 | proximal promoter |
| AT5G47560 | TONOPLAST DICARBOXYLATE TRANSF      | Encodes a tono          | 5_19286340   | 3.99 | intergenic        |
| AT1G26570 | UDP-GLUCOSE DEHYDROGENASE 1 (L      | UDP-glucose de          | 1_9184532    | 3.99 | downstream        |
| AT5G47110 | (LIL3.2)                            | Chlorophyll A-B         | 5_19133817   | 3.98 | downstream        |
| AT5G27350 | (SFP1)                              | Encodes a sug           | 5_9646057    | 3.98 | proximal promoter |
| AT5G40840 | (SYN2)                              | Cohesion family         | 5_16364654   | 3.98 | proximal promoter |
| AT4G23810 | (WRKY53)                            | member of WRI           | 4_12396486   | 3.98 | proximal promoter |
| AT5G48880 | 3-KETO-ACYL-COENZYME A THIOLEASE    | Encodes a pero          | 5_19817317   | 3.98 | intron            |

|           |                                                            |                              |      |                   |
|-----------|------------------------------------------------------------|------------------------------|------|-------------------|
| AT2G41560 | AUTOINHIBITED CA(2+)-ATPASE, ISOFC                         | Encodes a calr 2_17337326    | 3.98 | promoter          |
| AT5G52060 | BCL-2-ASSOCIATED ATHANOGENE 1 (E A member of Ar 5_21154968 |                              | 3.98 | proximal promoter |
| AT1G44446 | CHLORINA 1 (CH1)                                           | Encodes chloro 1_16851348    | 3.98 | promoter          |
| AT3G47060 | FTSH PROTEASE 7 (ftsh7)                                    | encodes an Ftsi 3_17332787   | 3.98 | promoter          |
| AT2G45050 | GATA TRANSCRIPTION FACTOR 2 (GAT1)                         | Encodes a merr 2_18582867    | 3.98 | promoter          |
| AT1G15380 | GLYOXYLASE 1 4 (GLY14)                                     | Lactoylglutathio 1_5290177   | 3.98 | proximal promoter |
| AT5G63715 | MICRORNA166G (MIR166G)                                     | Encodes a micr 5_25503457    | 3.98 | proximal promoter |
| AT1G52347 | na                                                         | Unknown gene 1_19496385      | 3.98 | promoter          |
| AT4G37880 | na                                                         | LisH/CRA/RING 4_17809610     | 3.98 | promoter          |
| AT5G66800 | na                                                         | unknown proteir 5_26672855   | 3.98 | intergenic        |
| AT5G66810 | na                                                         | CONTAINS Inte 5_26672855     | 3.98 | promoter          |
| AT3G26580 | na                                                         | Tetratricopeptid 3_9758777   | 3.98 | promoter          |
| AT3G48275 | na                                                         | pre-tRNA; tRNA 3_17894146    | 3.98 | promoter          |
| AT5G59395 | na                                                         | pre-tRNA; tRNA 5_23957603    | 3.98 | downstream        |
| AT5G59400 | na                                                         | FUNCTIONS IN 5_23957603      | 3.98 | promoter          |
| AT1G11390 | na                                                         | Protein kinase s 1_3837670   | 3.98 | promoter          |
| AT2G43560 | na                                                         | FKBP-like pepti 2_18075609   | 3.98 | promoter          |
| AT1G12500 | na                                                         | Nucleotide-suq 1_4265267     | 3.98 | promoter          |
| AT1G45160 | na                                                         | Protein kinase s 1_17091014  | 3.98 | promoter          |
| AT1G45163 | na                                                         | unknown proteir 1_17091014   | 3.98 | exon              |
| AT1G45165 | na                                                         | Expressed prote 1_17091014   | 3.98 | exon              |
| AT1G72570 | na                                                         | Integrase-type I 1_27332856  | 3.98 | intron            |
| AT1G14580 | na                                                         | C2H2-like zinc f 1_4994611   | 3.98 | intergenic        |
| AT3G02390 | na                                                         | unknown proteir 3_488895     | 3.98 | exon              |
| AT3G02400 | na                                                         | SMAD/FHA don 3_488895        | 3.98 | proximal promoter |
| AT2G31370 | na                                                         | Basic-leucine zi 2_13378952  | 3.98 | intron            |
| AT4G23820 | na                                                         | Pectin lyase-like 4_12396486 | 3.98 | intergenic        |
| AT4G40011 | na                                                         | unknown proteir 4_1852454    | 3.98 | proximal promoter |
| AT5G01910 | na                                                         | unknown proteir 5_359073     | 3.98 | promoter          |
| AT4G28080 | na                                                         | Tetratricopeptid 4_13958135  | 3.98 | promoter          |
| AT4G31650 | na                                                         | Transcriptional I 4_15329947 | 3.98 | proximal promoter |
| AT5G40348 | na                                                         | Potential natura 5_16136387  | 3.98 | promoter          |
| AT5G56840 | na                                                         | myb-like transcr 5_22983943  | 3.98 | intergenic        |
| AT1G11400 | PARTNER OF Y14-MAGO (PYM)                                  | The PYM gene 1_3837670       | 3.98 | promoter          |
| AT3G26570 | PHOSPHATE TRANSPORTER 2;1 (PHT2)                           | low affinity phos 3_9758777  | 3.98 | downstream        |
| AT5G01920 | STATE TRANSITION 8 (STN8)                                  | Chloroplast thyl: 5_359073   | 3.98 | promoter          |
| AT1G74020 | STRICTOSIDINE SYNTHASE 2 (SS2)                             | Encodes AtSS-1_27838290      | 3.98 | proximal promoter |
| AT1G53320 | TUBBY LIKE PROTEIN 7 (TLP7)                                | Member of TLP 1_19893551     | 3.98 | promoter          |
| AT1G78100 | AUXIN UP-REGULATED F-BOX PROTEIN 11 (AUX1)                 | F-box family prc 1_29385829  | 3.97 | proximal promoter |
| AT1G18400 | BR ENHANCED EXPRESSION 1 (BEE1)                            | BR enhanced e: 1_6333583     | 3.97 | three_prime_UTR   |
| AT5G50380 | EXOCYST SUBUNIT EXO70 FAMILY PRC A member of Ex 5_20519050 |                              | 3.97 | promoter          |
| AT1G54030 | MODIFIED VACUOLE PHENOTYPE 1 (MVP1)                        | Encodes a vac. 1_20167729    | 3.97 | exon              |
| AT1G63240 | na                                                         | unknown proteir 1_23458670   | 3.97 | promoter          |
| AT3G60410 | na                                                         | Protein of unknt 3_22331405  | 3.97 | promoter          |
| AT3G60400 | na                                                         | Mitochondrial tr: 3_22331405 | 3.97 | intergenic        |
| AT1G51170 | na                                                         | Protein kinase s 1_18953738  | 3.97 | exon              |
| AT1G55430 | na                                                         | Cysteine/Histidi 1_20698000  | 3.97 | exon              |
| AT2G01820 | na                                                         | Leucine-rich rep 2_360903    | 3.97 | promoter          |
| AT3G17450 | na                                                         | hAT dimerisatio 3_5976125    | 3.97 | promoter          |
| AT4G27585 | na                                                         | SPFH/Band 7/P 4_13769999     | 3.97 | promoter          |
| AT4G38825 | na                                                         | SAUR-like auxir 4_18121233   | 3.97 | promoter          |
| AT5G11250 | na                                                         | Disease resistai 5_3592077   | 3.97 | promoter          |
| AT2G35010 | THIOREDOXIN O1 (TO1)                                       | thioredoxin O1 ( 2_14754216  | 3.97 | promoter          |
| AT4G00180 | YABBY3 (YAB3)                                              | YABBY gene fai 4_75404       | 3.97 | promoter          |
| AT1G19920 | (APS2)                                                     | encodes a chlor 1_6916854    | 3.96 | promoter          |
| AT1G63680 | (MURE)                                                     | Encodes AtMuri 1_23618183    | 3.96 | intergenic        |
| AT4G09030 | ARABINO GALACTAN PROTEIN 10 (AGP10)                        | Encodes arabin 4_5793278     | 3.96 | intergenic        |
| AT2G46950 | CYTOCHROME P450, FAMILY 709, SUBFAMILY 1 (CYP709A1)        | member of CYP 2_19289337     | 3.96 | three_prime_UTR   |
| AT3G21270 | DOF ZINC FINGER PROTEIN 2 (DOF2)                           | Encodes Dof zir 3_7473165    | 3.96 | proximal promoter |
| AT2G20000 | HOBBIT (HBT)                                               | Required for cel 2_8637072   | 3.96 | five_prime_UTR    |
| AT1G52990 | na                                                         | thioredoxin fami 1_19740889  | 3.96 | intron            |
| AT2G46940 | na                                                         | unknown proteir 2_19289337   | 3.96 | proximal promoter |
| AT1G24530 | na                                                         | Transducin/WD 1_8694352      | 3.96 | exon              |
| AT1G33260 | na                                                         | Protein kinase s 1_12064259  | 3.96 | promoter          |
| AT1G55205 | na                                                         | unknown proteir 1_20593635   | 3.96 | proximal promoter |
| AT2G37650 | na                                                         | GRAS family tra 2_15792510   | 3.96 | promoter          |
| AT1G32470 | na                                                         | Single hybrid m: 1_11740362  | 3.96 | promoter          |
| AT1G80930 | na                                                         | MIF4G domain- 1_30409864     | 3.96 | promoter          |
| AT3G11780 | na                                                         | MD-2-related lip 3_3725762   | 3.96 | promoter          |
| AT2G32560 | na                                                         | F-box family prc 2_13824482  | 3.96 | promoter          |
| AT4G20960 | na                                                         | encodes diamin 4_11211832    | 3.96 | promoter          |
| AT4G39790 | na                                                         | Protein of unknt 4_18462091  | 3.96 | downstream        |
| AT5G06260 | na                                                         | TLD-domain coi 5_1901812     | 3.96 | intergenic        |
| AT2G01290 | RIBOSE-5-PHOSPHATE ISOMERASE 2 (RIB5P2)                    | Cytosolic ribose 2_150435    | 3.96 | promoter          |
| AT1G63690 | SIGNAL PEPTIDE PEPTIDASE-LIKE 2 (SIPEP2)                   | SIGNAL PEPTII 1_23618183     | 3.96 | promoter          |
| AT2G46030 | UBIQUITIN-CONJUGATING ENZYME 6 (UBC6)                      | Ubiquitin conjuc 2_18934324  | 3.96 | proximal promoter |
| AT4G13260 | YUCCA2 (YUC2)                                              | Encodes YUC2. 4_7717613      | 3.96 | intergenic        |
| AT1G36160 | ACETYL-COA CARBOXYLASE 1 (ACC1)                            | Encodes acetyl- 1_13533382   | 3.95 | promoter          |
| AT5G05690 | CONSTITUTIVE PHOTOMORPHOGENIC 1 (COP1)                     | Encodes a merr 5_1704951     | 3.95 | intron            |
| AT1G30610 | EMBRYO DEFECTIVE 2279 (emb2279)                            | Mutations in this 1_10846450 | 3.95 | promoter          |
| AT5G28490 | LIGHT-DEPENDENT SHORT HYPOCOTYLED 1 (LSD1)                 | Encodes a nucl 5_10452141    | 3.95 | intergenic        |
| AT2G28500 | LOB DOMAIN-CONTAINING PROTEIN 11 (LOB11)                   | LOB domain-co 2_12185932     | 3.95 | intergenic        |
| AT5G57880 | MULTIPOLAR SPINDLE 1 (MPS1)                                | Encodes MULT 5_23446710      | 3.95 | intron            |
| AT1G49610 | na                                                         | F-box family prc 1_18364735  | 3.95 | proximal promoter |
| AT1G34630 | na                                                         | BEST Arabidop: 1_12685148    | 3.95 | promoter          |
| AT5G10070 | na                                                         | RNase L inhibit 5_3150527    | 3.95 | promoter          |
| AT1G09980 | na                                                         | Putative serine 1_3261799    | 3.95 | promoter          |
| AT5G57887 | na                                                         | unknown proteir 5_23446710   | 3.95 | promoter          |
| AT5G57890 | na                                                         | Glutamine amid 5_23446710    | 3.95 | intergenic        |
| AT1G56240 | PHLOEM PROTEIN 2-B13 (PP2-B13)                             | phloem protein : 1_21058980  | 3.95 | proximal promoter |
| AT1G67740 | PHOTOSYSTEM II BY (PSBY)                                   | PsbY precursor 1_25395149    | 3.95 | five_prime_UTR    |
| AT4G17230 | SCARECROW-LIKE 13 (SCL13)                                  | Encodes a scar 4_9663806     | 3.95 | promoter          |
| AT4G24190 | SHEPHERD (SHD)                                             | encodes an orth 4_12556115   | 3.95 | promoter          |
| AT5G15330 | SPX DOMAIN GENE 4 (SPX4)                                   | SPX domain ge 5_4979406      | 3.95 | proximal promoter |

|           |                                    |                              |      |                   |
|-----------|------------------------------------|------------------------------|------|-------------------|
| AT5G16620 | TRANSLOCON AT THE INNER ENVELOPE   | chloroplast prot 5_5450586   | 3.95 | promoter          |
| AT3G54826 | ZINC RIBBON 3 (ZR3)                | Zim17-type zinc 3_20310273   | 3.95 | promoter          |
| AT2G04030 | (CR88)                             | Encodes a chl 2_1281772      | 3.94 | promoter          |
| AT3G10650 | (NUP1)                             | Encodes a nucl 3_3325191     | 3.94 | three_prime_UTR   |
| AT5G16630 | (RAD4)                             | RAD4; FUNCTI 5_5459831       | 3.94 | downstream        |
| AT3G10640 | (VPS60.1)                          | VPS60.1; CON 3_3325191       | 3.94 | promoter          |
| AT4G34490 | CYCLASE ASSOCIATED PROTEIN 1 (CA   | CYCLASE ASS 4_16487524       | 3.94 | promoter          |
| AT5G01040 | LACCASE 8 (LAC8)                   | putative laccase 5_15151     | 3.94 | intron            |
| AT3G53130 | LUTEIN DEFICIENT 1 (LUT1)          | Lutein-deficient 3_19696647  | 3.94 | three_prime_UTR   |
| AT5G22830 | MAGNESIUM (MG) TRANSPORTER 10 (I   | Transmembran 5_7630799       | 3.94 | three_prime_UTR   |
| AT3G27920 | MYB DOMAIN PROTEIN 0 (MYB0)        | Encodes a Myb 3_10360943     | 3.94 | intergenic        |
| AT3G53140 | na                                 | O-methyltransf 3_19696647    | 3.94 | three_prime_UTR   |
| AT1G78450 | na                                 | SOUL heme-bir 1_29516206     | 3.94 | intergenic        |
| AT4G34500 | na                                 | Protein kinase s 4_16487524  | 3.94 | downstream        |
| AT5G59010 | na                                 | Protein kinase f 5_23826665  | 3.94 | intergenic        |
| AT5G21020 | na                                 | unknown proteir 5_7139468    | 3.94 | intron            |
| AT5G24970 | na                                 | Protein kinase s 5_8608920   | 3.94 | promoter          |
| AT5G24980 | na                                 | unknown proteir 5_8608920    | 3.94 | promoter          |
| AT1G61260 | na                                 | Protein of unknc 1_22597059  | 3.94 | proximal promoter |
| AT4G20830 | na                                 | FAD-binding Be 4_11155444    | 3.94 | promoter          |
| AT4G20840 | na                                 | FAD-binding Be 4_11155444    | 3.94 | proximal promoter |
| AT2G13300 | na                                 | transposable elk 2_5522731   | 3.94 | proximal promoter |
| AT3G10120 | na                                 | unknown proteir 3_3128718    | 3.94 | proximal promoter |
| AT3G60647 | na                                 | unknown proteir 3_22419192   | 3.94 | promoter          |
| AT5G16640 | na                                 | Pentatricopeptid 5_5459831   | 3.94 | proximal promoter |
| AT5G22840 | na                                 | Protein kinase s 5_7630799   | 3.94 | three_prime_UTR   |
| AT1G60790 | TRICHOME BIREFRINGENCE-LIKE 2 (TE  | Encodes a merr 1_22382742    | 3.94 | promoter          |
| AT2G42260 | UV-B-INSENSITIVE 4 (UVI4)          | Encodes a nove 2_17603806    | 3.94 | promoter          |
| AT1G19730 | (ATRX4)                            | encodes a cytos 1_6824146    | 3.93 | promoter          |
| AT4G26640 | (WRKY20)                           | member of WRI 4_13442031     | 3.93 | proximal promoter |
| AT3G47730 | ATP-BINDING CASSETTE A2 (ABCA2)    | member of ATH 3_17598992     | 3.93 | promoter          |
| AT5G15530 | BIOTIN CARBOXYL CARRIER PROTEIN    | biotin carboxyl c 5_5047092  | 3.93 | intergenic        |
| AT5G49730 | FERRIC REDUCTION OXIDASE 6 (FRO6   | Encodes a plasi 5_20204713   | 3.93 | promoter          |
| AT5G61850 | LEAFY (LFY)                        | Encodes trans 5_24845643     | 3.93 | intron            |
| AT2G45450 | LITTLE ZIPPER 1 (ZPR1)             | ZPR1, a small l 2_18735786   | 3.93 | proximal promoter |
| AT3G48810 | na                                 | Pentatricopeptid 3_18096915  | 3.93 | promoter          |
| AT1G19740 | na                                 | ATP-dependent 1_6824146      | 3.93 | promoter          |
| AT1G75590 | na                                 | SAUR-like auxir 1_28387214   | 3.93 | intergenic        |
| AT2G01820 | na                                 | Leucine-rich rep 2_362292    | 3.93 | proximal promoter |
| AT2G36410 | na                                 | Family of unkno 2_15282321   | 3.93 | intergenic        |
| AT4G22580 | na                                 | Exostosin family 4_11890888  | 3.93 | promoter          |
| AT4G38860 | na                                 | SAUR-like auxir 4_18131693   | 3.93 | intergenic        |
| AT1G75040 | PATHOGENESIS-RELATED GENE 5 (PR    | Thaumatolike 1_28176723      | 3.93 | proximal promoter |
| AT5G07250 | RHOMBOID-LIKE PROTEIN 3 (RBL3)     | RHOMBOID-like 5_2276073      | 3.93 | promoter          |
| AT1G59650 | (CW14)                             | Encodes CW14 1_21915662      | 3.92 | intergenic        |
| AT4G30080 | AUXIN RESPONSE FACTOR 16 (ARF16)   | Involved in root 4_14707885  | 3.92 | proximal promoter |
| AT3G58170 | BET1P/SFT1P-LIKE PROTEIN 14A (BS14 | Encodes a Bet1 3_21543999    | 3.92 | promoter          |
| AT2G36830 | GAMMA TONOPLAST INTRINSIC PROTE    | Encodes a tono 2_15445217    | 3.92 | promoter          |
| AT2G16640 | MULTIMERIC TRANSLOCON COMPLEX      | multimeric trans 2_7215648   | 3.92 | promoter          |
| AT2G19660 | na                                 | Cysteine/Histidi 2_8498890   | 3.92 | promoter          |
| AT4G30090 | na                                 | FUNCTIONS IN 4_14707885      | 3.92 | intergenic        |
| AT5G64735 | na                                 | pre-tRNA; tRNA 5_25875385    | 3.92 | downstream        |
| AT5G66270 | na                                 | Zinc finger C-x8 5_26475904  | 3.92 | promoter          |
| AT1G68450 | PIGMENT DEFECTIVE 337 (PDE337)     | VQ motif-contai 1_25663978   | 3.92 | proximal promoter |
| AT2G16650 | PROTEINACEOUS RNASE P 2 (PRORP2    | Encodes a prote 2_7215648    | 3.92 | downstream        |
| AT3G62030 | ROTAMASE CYP 4 (ROC4)              | nuclear-encode 3_22973549    | 3.92 | intron            |
| AT1G64720 | (CP5)                              | membrane relat 1_24048728    | 3.91 | promoter          |
| AT1G31812 | ACYL-COA-BINDING PROTEIN 6 (ACBP6  | Acyl-CoA-bindir 1_11412241   | 3.91 | promoter          |
| AT3G05380 | ALWAYS EARLY 2 (ALY2)              | ALWAYS EARLY 3_1538878       | 3.91 | proximal promoter |
| AT3G04080 | APYRASE 1 (APY1)                   | Encodes an enz 3_1071879     | 3.91 | proximal promoter |
| AT5G42380 | CALMODULIN LIKE 37 (CML37)         | calmodulin like 5_16943630   | 3.91 | promoter          |
| AT1G31814 | FRIGIDA LIKE 2 (FRL2)              | family member c 1_11412241   | 3.91 | intergenic        |
| AT5G62560 | na                                 | RING/U-box su 5_25111661     | 3.91 | exon              |
| AT1G06640 | na                                 | encodes a prote 1_2032253    | 3.91 | promoter          |
| AT5G38720 | na                                 | unknown proteir 5_15510714   | 3.91 | promoter          |
| AT5G38730 | na                                 | Tetatricopeptid 5_15510714   | 3.91 | promoter          |
| AT1G72190 | na                                 | D-isomer specif 1_27170067   | 3.91 | promoter          |
| AT1G72200 | na                                 | RING/U-box su 1_27170067     | 3.91 | exon              |
| AT1G09575 | na                                 | Protein of unknc 1_3103259   | 3.91 | promoter          |
| AT3G53740 | na                                 | Ribosomal prote 3_19915151   | 3.91 | promoter          |
| AT3G54830 | na                                 | Transmembran 3_20313669      | 3.91 | intron            |
| AT3G62110 | na                                 | Pectin lyase-like 3_22999759 | 3.91 | five_prime_UTR    |
| AT4G12690 | na                                 | Plant protein of 4_7480516   | 3.91 | promoter          |
| AT4G36860 | na                                 | LIM domain-cor 4_17365673    | 3.91 | intergenic        |
| AT5G40460 | na                                 | unknown proteir 5_16205782   | 3.91 | intergenic        |
| AT5G14440 | na                                 | Surfeit locus prc 5_4657999  | 3.91 | promoter          |
| AT5G12840 | NUCLEAR FACTOR Y, SUBUNIT A1 (NF-  | Encodes a subu 5_4053772     | 3.91 | promoter          |
| AT2G39290 | PHOSPHATIDYLGLYCEROLPHOSPHATI      | Encodes a phos 2_16407076    | 3.91 | promoter          |
| AT5G49510 | PREFOLDIN 3 (PFD3)                 | prefoldin 3 (PFC 5_20080493  | 3.91 | promoter          |
| AT3G05370 | RECEPTOR LIKE PROTEIN 31 (RLP31)   | receptor like prc 3_1538878  | 3.91 | promoter          |
| AT3G04090 | SMALL AND BASIC INTRINSIC PROTEIN  | Belongs to a far 3_1071879   | 3.91 | downstream        |
| AT4G15415 | (ATB' GAMMA)                       | B' regulatory su 4_8816911   | 3.9  | promoter          |
| AT1G27840 | (ATCSA-1)                          | Encodes a DDE 1_9696571      | 3.9  | promoter          |
| AT2G14960 | (GH3.1)                            | encodes a prote 2_6454586    | 3.9  | proximal promoter |
| AT1G80050 | ADENINE PHOSPHORIBOSYL TRANSFER    | Encodes an ade 1_30111315    | 3.9  | downstream        |
| AT1G32150 | BASIC REGION/LEUCINE ZIPPER TRAN   | Encodes a G or 1_11568620    | 3.9  | downstream        |
| AT1G62540 | FLAVIN-MONOOXYGENASE GLUCOSIN      | belongs to the fl 1_23150310 | 3.9  | proximal promoter |
| AT1G31320 | LOB DOMAIN-CONTAINING PROTEIN 4    | LOB domain-co 1_11212861     | 3.9  | promoter          |
| AT5G47040 | LON PROTEASE 2 (LON2)              | Encodes a merr 5_19101033    | 3.9  | proximal promoter |
| AT5G52890 | na                                 | AT hook motif-c 5_21449965   | 3.9  | proximal promoter |
| AT2G44735 | na                                 | BEST Arabidop: 2_18438834    | 3.9  | exon              |
| AT1G67340 | na                                 | HCP-like super 1_25225523    | 3.9  | intergenic        |
| AT3G09620 | na                                 | P-loop containir 3_2952561   | 3.9  | promoter          |
| AT2G21960 | na                                 | unknown proteir 2_9354814    | 3.9  | promoter          |

|           |                                    |                   |                   |      |                   |
|-----------|------------------------------------|-------------------|-------------------|------|-------------------|
| AT1G21080 | na                                 | DNAJ heat shock   | 1_7382486         | 3.9  | intron            |
| AT1G80040 | na                                 | FUNCTIONS IN      | 1_30111315        | 3.9  | promoter          |
| AT3G28200 | na                                 | Peroxidase sup    | 3_10516820        | 3.9  | proximal promoter |
| AT3G11580 | na                                 | AP2/B3-like trar  | 3_3655836         | 3.9  | intergenic        |
| AT4G20430 | na                                 | Subtilase family  | 4_11021448        | 3.9  | promoter          |
| AT1G32160 | na                                 | Protein of unkn   | 1_11568620        | 3.9  | promoter          |
| AT1G74570 | na                                 | pre-tRNA; tRNA    | 1_28020290        | 3.9  | downstream        |
| AT3G18773 | na                                 | RING/U-box su     | 3_6466119         | 3.9  | five_prime_UTR    |
| AT3G53990 | na                                 | Adenine nucleot   | 3_19992894        | 3.9  | proximal promoter |
| AT4G32470 | na                                 | Cytochrome bd     | 4_15671304        | 3.9  | promoter          |
| AT4G32475 | na                                 | pre-tRNA; tRNA    | 4_15671304        | 3.9  | promoter          |
| AT5G17070 | na                                 | CONTAINS Inte     | 5_5616212         | 3.9  | promoter          |
| AT4G15410 | SERINE/THREONINE PROTEIN PHOSPH    | serine/threonine  | 4_8816911         | 3.9  | downstream        |
| AT2G21950 | SKP1 INTERACTING PARTNER 6 (SKIP6  | Encodes an SK     | 2_9354814         | 3.9  | promoter          |
| AT1G30210 | TEOSINTE BRANCHED 1, CYCLOIDEA, /  | TCP family prot   | 1_10630640        | 3.9  | promoter          |
| AT2G36420 | TON1 RECRUITING MOTIF 27 (TRM27)   | unknown protei    | 2_15284242        | 3.9  | proximal promoter |
| AT3G02870 | (VTC4)                             | Encodes a L-ga    | 3_630011          | 3.89 | promoter          |
| AT1G60270 | BETA GLUCOSIDASE 6 (BGLU6)         | beta glucosidas   | 1_22225683        | 3.89 | proximal promoter |
| AT4G26100 | CASEIN KINASE 1 (CK1)              | Encodes a mem     | 4_13230832        | 3.89 | promoter          |
| AT2G42540 | COLD-REGULATED 15A (COR15A)        | A cold-regulate   | 2_17712373        | 3.89 | promoter          |
| AT1G26770 | EXPANSIN A10 (EXPA10)              | Encodes an exp    | 1_9259357         | 3.89 | promoter          |
| AT3G14720 | MAP KINASE 19 (MPK19)              | member of MAF     | 3_4945476         | 3.89 | promoter          |
| AT5G28145 | na                                 | transposable el   | 5_10128233        | 3.89 | proximal promoter |
| AT2G46290 | na                                 | Transducin/WD     | 2_19008011        | 3.89 | promoter          |
| AT5G48610 | na                                 | unknown protei    | 5_19711493        | 3.89 | promoter          |
| AT5G36240 | na                                 | zinc knuckle (C   | 5_14280317        | 3.89 | proximal promoter |
| AT3G03010 | na                                 | Peptidyl-tRNA     | h_3_680750        | 3.89 | promoter          |
| AT3G03020 | na                                 | unknown protei    | 3_680750          | 3.89 | promoter          |
| AT3G49200 | na                                 | O-acyltransfera   | 3_18238469        | 3.89 | proximal promoter |
| AT3G49210 | na                                 | O-acyltransfera   | 3_18238469        | 3.89 | exon              |
| AT3G61898 | na                                 | unknown protei    | 3_22923831        | 3.89 | intergenic        |
| AT4G38640 | na                                 | Plasma-membr      | 4_18062388        | 3.89 | promoter          |
| AT4G39780 | na                                 | encodes a mem     | 4_18460924        | 3.89 | proximal promoter |
| AT5G38096 | na                                 | Pseudogene of     | 5_15201154        | 3.89 | exon              |
| AT4G37860 | na                                 | SPT2 chromatin    | 4_17802799        | 3.89 | proximal promoter |
| AT5G38100 | na                                 | S-adenosyl-L-m    | 5_15201154        | 3.89 | exon              |
| AT5G52850 | na                                 | Pentatricopeptic  | 5_21418503        | 3.89 | proximal promoter |
| AT5G59760 | na                                 | Protein of unkn   | 5_24075746        | 3.89 | exon              |
| AT4G37870 | PHOSPHOENOLPYRUVATE CARBOXYK       | Encodes a phos    | 4_17802799        | 3.89 | three_prime_UTR   |
| AT5G24470 | PSEUDO-RESPONSE REGULATOR 5 (P     | Encodes a pseu    | 5_8361124         | 3.89 | proximal promoter |
| AT3G46590 | TRF-LIKE 1 (TRFL1)                 | Encodes a prote   | 3_17151363        | 3.89 | proximal promoter |
| AT5G42020 | (BIP2)                             | Luminal binding   | 5_16810687        | 3.88 | promoter          |
| AT2G17520 | (IRE1A)                            | Encodes a endc    | 2_7617143         | 3.88 | promoter          |
| AT3G14370 | (WAG2)                             | The WAG2 and      | 3_4800089         | 3.88 | proximal promoter |
| AT5G42030 | ABL INTERACTOR-LIKE PROTEIN 4 (ABI | ABL interactor-l  | 5_16810687        | 3.88 | intergenic        |
| AT1G73680 | ALPHA DIOXYGENASE (ALPHA DOX2)     | Encodes an alp    | 1_27710117        | 3.88 | proximal promoter |
| AT3G17700 | CYCLIC NUCLEOTIDE-BINDING TRANSF   | cyclic nucleotide | 3_6048807         | 3.88 | promoter          |
| AT1G13950 | EUKARYOTIC ELONGATION FACTOR 5/    | Encodes eukary    | 1_4771472         | 3.88 | proximal promoter |
| AT3G13810 | INDETERMINATE(ID)-DOMAIN 11 (IDD11 | indeterminate(I   | 3_4546257         | 3.88 | intron            |
| AT2G15050 | LIPID TRANSFER PROTEIN (LTP)       | Predicted to enc  | 2_6518833         | 3.88 | promoter          |
| AT5G65590 | na                                 | Dof-type zinc     | fir_5_26215588    | 3.88 | proximal promoter |
| AT1G17660 | na                                 | pre-tRNA; tRNA    | 1_6075900         | 3.88 | downstream        |
| AT1G17670 | na                                 | pre-tRNA; tRNA    | 1_6075900         | 3.88 | downstream        |
| AT1G78820 | na                                 | D-mannose bin     | 1_29635842        | 3.88 | promoter          |
| AT3G50230 | na                                 | Leucine-rich re   | 3_18620016        | 3.88 | proximal promoter |
| AT4G18380 | na                                 | F-box family pr   | 4_10161077        | 3.88 | intergenic        |
| AT5G47590 | na                                 | Heat shock prot   | 5_19299264        | 3.88 | promoter          |
| AT5G39020 | na                                 | Malectin/recept   | 5_15616844        | 3.88 | promoter          |
| AT5G50995 | na                                 | pre-tRNA; tRNA    | 5_20741623        | 3.88 | downstream        |
| AT5G57280 | ROOT INITIATION DEFECTIVE 2 (RID2) | Gene encodes      | 5_23204366        | 3.88 | promoter          |
| AT4G19640 | (ARA7)                             | Encodes Ara7.     | 4_10689634        | 3.87 | promoter          |
| AT3G11020 | DRE/CRT-BINDING PROTEIN 2B (DREB   | encodes a mem     | 3_3455281         | 3.87 | promoter          |
| AT1G56200 | EMBRYO DEFECTIVE 1303 (emb1303)    | Encodes a chlo    | 1_21030725        | 3.87 | promoter          |
| AT4G35920 | MID1-COMPLEMENTING ACTIVITY 1 (MC  | Encodes an inte   | 4_17015311        | 3.87 | promoter          |
| AT1G02030 | na                                 | C2H2-like zinc    | f_1_356908        | 3.87 | five_prime_UTR    |
| AT1G61400 | na                                 | S-locus lectin    | pi_1_22658435     | 3.87 | proximal promoter |
| AT1G61410 | na                                 | DNA double-str    | 1_22658435        | 3.87 | downstream        |
| AT2G05920 | na                                 | Subtilase family  | 2_2269524         | 3.87 | three_prime_UTR   |
| AT5G17190 | na                                 | FUNCTIONS IN      | 5_5652191         | 3.87 | promoter          |
| AT4G23895 | na                                 | Pleckstrin hom    | 4_12421515        | 3.87 | proximal promoter |
| AT4G19645 | na                                 | TRAM, LAG1 ar     | 4_10689634        | 3.87 | downstream        |
| AT4G36850 | na                                 | PQ-loop repeat    | 4_17355879        | 3.87 | five_prime_UTR    |
| AT4G23890 | NADH DEHYDROGENASE-LIKE COMPLI     | unknown protei    | 4_12421515        | 3.87 | promoter          |
| AT2G20890 | PHOTOSYSTEM II REACTION CENTER I   | Chloroplast-loc   | 2_8987576         | 3.87 | promoter          |
| AT2G30070 | POTASSIUM TRANSPORTER 1 (KT1)      | Encodes a high    | 2_12834990        | 3.87 | promoter          |
| AT1G80670 | RNA EXPORT FACTOR 1 (RAE1)         | This gene is pre  | 1_30323872        | 3.87 | promoter          |
| AT2G28630 | 3-KETOACYL-COA SYNTHASE 12 (KCS1   | Encodes KCS1;     | 2_12277436        | 3.86 | promoter          |
| AT3G61190 | BON ASSOCIATION PROTEIN 1 (BAP1)   | Encodes a prote   | 3_22652199        | 3.86 | proximal promoter |
| AT5G20650 | COPPER TRANSPORTER 5 (COPT5)       | Encodes COPT      | 5_6986071         | 3.86 | promoter          |
| AT5G22640 | EMBRYO DEFECTIVE 1211 (emb1211)    | EMB1211 is a M    | 5_7528560         | 3.86 | proximal promoter |
| AT3G13060 | EVOLUTIONARILY CONSERVED C-TER     | evolutionarily    | cc_3_4184548      | 3.86 | intergenic        |
| AT1G65960 | GLUTAMATE DECARBOXYLASE 2 (GAD     | glutamate decar   | 1_24553237        | 3.86 | intron            |
| AT4G25840 | GLYCEROL-3-PHOSPHATASE 1 (GPP1)    | glycerol-3-phos   | 4_13138062        | 3.86 | proximal promoter |
| AT3G57650 | LYSOPHOSPHATIDYL ACYLTRANSFER      | Encodes an enc    | 3_21349461        | 3.86 | promoter          |
| AT5G01340 | MITOCHONDRIAL SUCCINATE-FUMARA     | Mitochondrial     | su_5_141816       | 3.86 | intergenic        |
| AT1G20370 | na                                 | Pseudouridine     | epsilon_1_7054356 | 3.86 | proximal promoter |
| AT1G55140 | na                                 | Ribonuclease      | III_1_20574471    | 3.86 | promoter          |
| AT1G55152 | na                                 | unknown protei    | 1_20577596        | 3.86 | three_prime_UTR   |
| AT4G12980 | na                                 | Auxin-responsiv   | 4_7589964         | 3.86 | intron            |
| AT1G31300 | na                                 | TRAM, LAG1 ar     | 1_11197828        | 3.86 | intergenic        |
| AT1G31310 | na                                 | hydroxyproline-   | 1_11197828        | 3.86 | intergenic        |
| AT2G35750 | na                                 | unknown protei    | 2_15030454        | 3.86 | promoter          |
| AT3G01130 | na                                 | unknown protei    | 3_45881           | 3.86 | promoter          |
| AT3G07280 | na                                 | pseudogene of     | 3_2321533         | 3.86 | promoter          |

|           |                                      |                    |               |            |                   |
|-----------|--------------------------------------|--------------------|---------------|------------|-------------------|
| AT3G13062 | na                                   | Polyketide cycl    | 3_4184548     | 3.86       | promoter          |
| AT2G26720 | na                                   | Cupredoxin sup     | 2_11386090    | 3.86       | intergenic        |
| AT3G15480 | na                                   | Protein of unkn    | 3_5227988     | 3.86       | promoter          |
| AT3G19235 | na                                   | pre-tRNA; tRNA     | 3_6664212     | 3.86       | intergenic        |
| AT3G19240 | na                                   | Vacuolar import    | 3_6664212     | 3.86       | promoter          |
| AT3G19250 | na                                   | Protein of unkn    | 3_6664212     | 3.86       | intergenic        |
| AT3G28480 | na                                   | Oxoglutarate/irc   | 3_10678368    | 3.86       | five_prime_UTR    |
| AT3G28695 | na                                   | pre-tRNA; tRNA     | 3_10759363    | 3.86       | downstream        |
| AT3G28700 | na                                   | Protein of unkn    | 3_10759363    | 3.86       | promoter          |
| AT3G48440 | na                                   | Zinc finger C-x8   | 3_17941195    | 3.86       | promoter          |
| AT5G01335 | na                                   | transposable el    | 5_141816      | 3.86       | intergenic        |
| AT5G20660 | na                                   | Zn-dependent e     | 5_6986071     | 3.86       | promoter          |
| AT5G40180 | na                                   | BEST Arabidop:     | 5_16067843    | 3.86       | promoter          |
| AT5G51300 | na                                   | splicing factor-ri | 5_20853057    | 3.86       | proximal promoter |
| AT5G51310 | na                                   | Mutants exhibit    | 5_20853057    | 3.86       | exon              |
| AT3G19050 | PHRAGMOPLAST ORIENTING KINESIN       | : PHRAGMOPLA       | 3_6577652     | 3.86       | promoter          |
| AT3G46830 | RAB GTPASE HOMOLOG A2C (RABA2c)      | RAB GTPase h       | 3_17248815    | 3.86       | promoter          |
| AT5G40170 | RECEPTOR LIKE PROTEIN 54 (RLP54)     | receptor like prc  | 5_16067843    | 3.86       | promoter          |
| AT3G48430 | RELATIVE OF EARLY FLOWERING 6 (REL6) | Relative of Earl   | 3_17941195    | 3.86       | intergenic        |
| AT1G55150 | RNA HELICASE 20 (RH20)               | DEA(D/H)-box f     | 1_20574471    | 3.86       | promoter          |
| AT1G55150 | RNA HELICASE 20 (RH20)               | DEA(D/H)-box f     | 1_20577596    | 3.86       | intergenic        |
| AT2G37080 | ROP INTERACTIVE PARTNER 3 (RIP3)     | Encodes RIP3       | (2_15586221   | 3.86       | proximal promoter |
| AT5G21170 | (AKINBETA1)                          | Encodes AKINb      | 5_7208584     | 3.85       | downstream        |
| AT1G20440 | COLD-REGULATED 47 (COR47)            | Belongs to the c   | 1_7085704     | 3.85       | five_prime_UTR    |
| AT1G63710 | CYTOCHROME P450, FAMILY 86, SUBF     | Encodes a mem      | 1_23633147    | 3.85       | exon              |
| AT1G10130 | ENDOPLASMIC RETICULUM-TYPE CALC      | Encodes a golg     | 1_3309928     | 3.85       | proximal promoter |
| AT2G47520 | ETHYLENE RESPONSE FACTOR 71 (ERF71)  | encodes a mem      | 2_19502446    | 3.85       | intergenic        |
| AT1G13020 | EUKARYOTIC INITIATION FACTOR 4B2     | Encodes eIF4B      | 1_4443790     | 3.85       | promoter          |
| AT1G72500 | na                                   | LOCATED IN: p      | 1_27298695    | 3.85       | promoter          |
| AT3G16851 | na                                   | unknown protei     | 3_5753953     | 3.85       | intergenic        |
| AT1G20410 | na                                   | Pseudouridine s    | 1_7085704     | 3.85       | intergenic        |
| AT1G20420 | na                                   | pre-tRNA; tRNA     | 1_7085704     | 3.85       | intergenic        |
| AT1G20430 | na                                   | unknown protei     | 1_7085704     | 3.85       | proximal promoter |
| AT2G18030 | na                                   | Peptide methior    | 2_7840053     | 3.85       | promoter          |
| AT4G12005 | na                                   | unknown protei     | 4_7196413     | 3.85       | promoter          |
| AT5G21222 | na                                   | protein kinase fi  | 5_7208584     | 3.85       | promoter          |
| AT2G19170 | SUBTILISIN-LIKE SERINE PROTEASE 3    | Encodes a nove     | 2_8318972     | 3.85       | promoter          |
| AT2G24570 | WRKY DNA-BINDING PROTEIN 17 (WRK17)  | member of WR1      | 2_10440621    | 3.85       | proximal promoter |
| AT1G48260 | CBL-INTERACTING PROTEIN KINASE 1     | Encodes a mem      | 1_17816502    | 3.84       | intron            |
| AT2G28190 | COPPER/ZINC SUPEROXIDE DISMUTASE     | Encodes a chl      | 2_12017730    | 3.84       | intergenic        |
| AT1G51700 | DOF ZINC FINGER PROTEIN 1 (DOF1)     | Encodes dof zin    | 1_19171170    | 3.84       | proximal promoter |
| AT5G09410 | ETHYLENE INDUCED CALMODULIN BINDING  | calmodulin-bind    | 5_2921210     | 3.84       | intron            |
| AT1G52520 | FAR1-RELATED SEQUENCE 6 (FRS6)       | FAR1-related sr    | 1_19565666    | 3.84       | promoter          |
| AT5G48030 | GAMETOPHYTIC FACTOR 2 (GFA2)         | encodes a mit      | 5_19469975    | 3.84       | promoter          |
| AT2G17540 | na                                   | unknown protei     | 2_7630127     | 3.84       | intergenic        |
| AT3G13190 | na                                   | Plant protein of   | 3_4240423     | 3.84       | five_prime_UTR    |
| AT3G49070 | na                                   | Protein of unkn    | 3_18193383    | 3.84       | exon              |
| AT5G63380 | na                                   | Encodes a pero     | 5_25390274    | 3.84       | promoter          |
| AT5G07340 | na                                   | Calreticulin fami  | 5_2317067     | 3.84       | promoter          |
| AT2G06025 | na                                   | Acy-CoA N-acy      | 2_2350124     | 3.84       | intron            |
| AT2G46290 | na                                   | Transducin/WD      | 2_19005615    | 3.84       | downstream        |
| AT3G25720 | na                                   | RNA-directed D     | 3_9381769     | 3.84       | intergenic        |
| AT4G17810 | na                                   | C2H2 and C2H       | 4_9905821     | 3.84       | proximal promoter |
| AT5G09513 | na                                   | pseudogene of      | 1_5_2958327   | 3.84       | promoter          |
| AT1G77740 | PHOSPHATIDYLINOSITOL-4-PHOSPHAT      | Encodes PIP5K      | 1_29223355    | 3.84       | intron            |
| AT5G09520 | PRO-GLU-LEUJILEIVAL-PRO-LYS 2 (PEL2) | hydroxyproline-i   | 5_2958327     | 3.84       | three_prime_UTR   |
| AT1G51690 | PROTEIN PHOSPHATASE 2A 55 KDa B      | regula_1_19171170  | 3.84          | intergenic |                   |
| AT5G25610 | RESPONSIVE TO DESSICATION 22 (RD22)  | responsive to d    | 5_8916878     | 3.84       | promoter          |
| AT2G46280 | TGF-BETA RECEPTOR INTERACTING P      | Encodes a hom      | 2_19005615    | 3.84       | promoter          |
| AT1G12240 | (ATBETAFRUCT4)                       | Encodes a vac      | 1_4157486     | 3.83       | three_prime_UTR   |
| AT4G29160 | (SNF7.1)                             | SNF7.1; CONT       | 4_14380673    | 3.83       | promoter          |
| AT5G47580 | ALTERED SEED GERMINATION 7 (ASG7)    | unknown protei     | 5_19297451    | 3.83       | promoter          |
| AT1G61810 | BETA-GLUCOSIDASE 45 (BGLU45)         | beta-glucosidas    | 1_22829771    | 3.83       | promoter          |
| AT4G29150 | IQ-DOMAIN 25 (IQD25)                 | IQ-domain 25       | (l_4_14380673 | 3.83       | downstream        |
| AT2G16240 | na                                   | pre-tRNA; tRNA     | 2_7039267     | 3.83       | downstream        |
| AT3G49550 | na                                   | unknown protei     | 3_18367674    | 3.83       | promoter          |
| AT1G12244 | na                                   | Polynucleotidyl    | 1_4157486     | 3.83       | promoter          |
| AT1G20380 | na                                   | Prolyl oligopept   | 1_7062033     | 3.83       | intron            |
| AT2G30050 | na                                   | transducin fami    | 2_12824315    | 3.83       | promoter          |
| AT1G66870 | na                                   | Carbohydrate-b     | 1_24947967    | 3.83       | proximal promoter |
| AT1G66880 | na                                   | Protein kinase s   | 1_24947967    | 3.83       | intron            |
| AT3G22133 | na                                   | transposable el    | 3_7798020     | 3.83       | proximal promoter |
| AT3G13700 | na                                   | RNA-binding (R     | 3_4492828     | 3.83       | three_prime_UTR   |
| AT3G49400 | na                                   | Transducin/WD      | 3_18324556    | 3.83       | intron            |
| AT4G18060 | na                                   | SH3 domain-co      | 4_10030011    | 3.83       | promoter          |
| AT4G18070 | na                                   | unknown protei     | 4_10030011    | 3.83       | proximal promoter |
| AT5G47590 | na                                   | Heat shock prot    | 5_19297451    | 3.83       | intergenic        |
| AT3G07560 | PEROXIN 13 (PEX13)                   | Encodes peroxi     | 3_2413452     | 3.83       | five_prime_UTR    |
| AT3G13710 | PRENYLATED RAB ACCEPTOR 1.F4 (PF1)   | prenylated RAB     | 3_4492828     | 3.83       | five_prime_UTR    |
| AT1G13440 | GLYCERALDEHYDE-3-PHOSPHATE DEHYD     | glyceraldehyde-    | 1_4610814     | 3.82       | promoter          |
| AT5G54070 | HEAT SHOCK TRANSCRIPTION FACTOR 1A   | member of Hs       | 5_21945806    | 3.82       | downstream        |
| AT5G54080 | HOMOGENITISATE 1,2-DIOXYGENASE (H1)  | homogentisate      | 5_21945806    | 3.82       | promoter          |
| AT2G46685 | MICRORNA166A (MIR166A)               | Encodes a micr     | 2_19171609    | 3.82       | intergenic        |
| AT2G37750 | na                                   | unknown protei     | 2_15831221    | 3.82       | exon              |
| AT4G40011 | na                                   | unknown protei     | 4_18551275    | 3.82       | exon              |
| AT1G72250 | na                                   | Di-glucose bind    | 1_27192653    | 3.82       | promoter          |
| AT4G01040 | na                                   | Glycosyl hydro     | 4_455664      | 3.82       | downstream        |
| AT1G22720 | na                                   | Protein kinase s   | 1_8039829     | 3.82       | intergenic        |
| AT1G32650 | na                                   | unknown protei     | 1_11807043    | 3.82       | intergenic        |
| AT3G06470 | na                                   | GNS1/SUR4 me       | 3_1984912     | 3.82       | exon              |
| AT3G23170 | na                                   | unknown protei     | 3_8268814     | 3.82       | promoter          |
| AT3G28923 | na                                   | Pseudogene of      | 3_10949516    | 3.82       | intergenic        |
| AT3G20300 | na                                   | Protein of unkn    | 3_7082680     | 3.82       | proximal promoter |
| AT3G55240 | na                                   | Overexpression     | 3_20476687    | 3.82       | proximal promoter |

|           |                                   |                   |              |      |                   |
|-----------|-----------------------------------|-------------------|--------------|------|-------------------|
| AT5G62680 | na                                | Major facilitator | 5_25171622   | 3.82 | intergenic        |
| AT5G56630 | PHOSPHOFRUCTOKINASE 7 (PFK7)      | phosphofructoki   | 5_22923098   | 3.82 | proximal promoter |
| AT2G05070 | PHOTOSYSTEM II LIGHT HARVESTING I | Encodes Lhcb2     | 2_1800542    | 3.82 | promoter          |
| AT1G09530 | PHYTOCHROME INTERACTING FACTOR    | Transcription fa  | 1_3076642    | 3.82 | five_prime_UTR    |
| AT4G01050 | THYLAKOID RHODANESSE-LIKE (TROL)  | hydroxyproline-   | 4_455664     | 3.82 | promoter          |
| AT5G54075 | U3 SMALL NUCLEOLAR RNAD (U3D)     | U3 small nuclec   | 5_21945806   | 3.82 | promoter          |
| AT2G46400 | WRKY DNA-BINDING PROTEIN 46 (WRK  | member of WR1     | 2_19046680   | 3.82 | proximal promoter |
| AT1G66140 | ZINC FINGER PROTEIN 4 (ZFP4)      | Encodes a zinc    | 1_24621095   | 3.82 | intron            |
| AT1G08680 | ARF GAP-LIKE ZINC FINGER-CONTAINI | A member of Af    | 1_2762609    | 3.81 | five_prime_UTR    |
| AT4G23990 | CELLULOSE SYNTHASE LIKE G3 (CSLG  | encodes a prote   | 4_12455990   | 3.81 | promoter          |
| AT5G40890 | CHLORIDE CHANNEL A (CLC-A)        | Encodes a merr    | 5_16385301   | 3.81 | five_prime_UTR    |
| AT1G14900 | HIGH MOBILITY GROUP A (HMGA)      | Encodes a prote   | 1_5139521    | 3.81 | promoter          |
| AT3G57150 | HOMOLOGUE OF NAP57 (NAP57)        | Encodes a puta    | 3_21153865   | 3.81 | downstream        |
| AT1G19870 | IQ-DOMAIN 32 (iqd32)              | IQ-domain 32 (i   | 1_6894791    | 3.81 | downstream        |
| AT1G68480 | JAGGED (JAG)                      | Encodes a puta    | 1_25688501   | 3.81 | proximal promoter |
| AT2G32510 | MITOGEN-ACTIVATED PROTEIN KINASE  | member of MEK     | 2_13798985   | 3.81 | exon              |
| AT1G19860 | na                                | Zinc finger C-x8  | 1_6894791    | 3.81 | promoter          |
| AT1G21780 | na                                | BTB/POZ doma      | 1_7654115    | 3.81 | downstream        |
| AT1G21790 | na                                | TRAM, LAG1 ar     | 1_7654115    | 3.81 | promoter          |
| AT1G62310 | na                                | transcription fac | 1_23039916   | 3.81 | promoter          |
| AT3G55780 | na                                | Glycosyl hydrok   | 3_20705413   | 3.81 | promoter          |
| AT5G16140 | na                                | Peptidyl-tRNA h   | 5_5272046    | 3.81 | promoter          |
| AT4G02940 | na                                | oxidoreductase,   | 4_1308566    | 3.81 | intron            |
| AT5G47020 | na                                | unknown proteir   | 5_19090272   | 3.81 | intergenic        |
| AT5G47030 | na                                | Encodes the mii   | 5_19090272   | 3.81 | promoter          |
| AT1G09150 | na                                | pseudouridine s   | 1_2946095    | 3.81 | promoter          |
| AT1G26620 | na                                | Plant protein of  | 1_9202352    | 3.81 | proximal promoter |
| AT1G29715 | na                                | pseudogene, pt    | 1_10393014   | 3.81 | promoter          |
| AT1G62600 | na                                | Flavin-binding n  | 1_23179378   | 3.81 | promoter          |
| AT2G25890 | na                                | Oleolin family p  | 2_11037100   | 3.81 | promoter          |
| AT1G14910 | na                                | ENTH/ANTH/Vt      | 1_5139521    | 3.81 | downstream        |
| AT3G03270 | na                                | Adenine nucleoi   | 3_761630     | 3.81 | intron            |
| AT3G62735 | na                                | pre-tRNA; tRNA    | 3_23210699   | 3.81 | promoter          |
| AT5G65480 | na                                | unknown proteir   | 5_26175912   | 3.81 | promoter          |
| AT5G61770 | PETER PAN-LIKE PROTEIN (PPAN)     | PETER PAN-lik     | 5_24818375   | 3.81 | intergenic        |
| AT3G44735 | PHYTOSULFOKINE 3 PRECURSOR (PSI   | Phytosulfokine    | 3_16292596   | 3.81 | promoter          |
| AT3G57140 | SUGAR-DEPENDENT 1-LIKE (SDP1-LIKE | sugar-depender    | 3_21153865   | 3.81 | promoter          |
| AT4G36710 | (HAM4)                            | GRAS family tra   | 4_17307446   | 3.8  | exon              |
| AT1G33560 | ACTIVATED DISEASE RESISTANCE 1 (A | Encodes a NB      | 1_12168143   | 3.8  | proximal promoter |
| AT1G46264 | HEAT SHOCK TRANSCRIPTION FACTOR   | Encodes SCHI2     | 1_17226486   | 3.8  | downstream        |
| AT4G36720 | HVA22-LIKE PROTEIN K (HVA22K)     | HVA22-like prot   | 4_17307446   | 3.8  | promoter          |
| AT1G21880 | LYSM DOMAIN GPI-ANCHORED PROTE    | Encodes a lysin   | 1_7680286    | 3.8  | promoter          |
| AT2G45412 | na                                | unknown proteir   | 2_18714579   | 3.8  | exon              |
| AT2G32020 | na                                | Acyl-CoA N-acy    | 2_13632004   | 3.8  | promoter          |
| AT1G10865 | na                                | FUNCTIONS IN      | 1_3616207    | 3.8  | promoter          |
| AT1G30200 | na                                | F-box family prc  | 1_10625091   | 3.8  | five_prime_UTR    |
| AT1G63855 | na                                | Putative methyl   | 1_23701068   | 3.8  | promoter          |
| AT1G80170 | na                                | Pectin lyase-like | 1_30156552   | 3.8  | proximal promoter |
| AT2G26695 | na                                | Ran BP2/NZF z     | 2_11363486   | 3.8  | proximal promoter |
| AT2G35637 | na                                | Potential natura  | 2_14984398   | 3.8  | promoter          |
| AT2G35640 | na                                | Homeodomain-l     | 2_14984398   | 3.8  | downstream        |
| AT1G56020 | na                                | unknown proteir   | 1_20952004   | 3.8  | promoter          |
| AT1G63860 | na                                | Disease resistai  | 1_23701068   | 3.8  | intergenic        |
| AT3G13480 | na                                | unknown proteir   | 3_4394110    | 3.8  | promoter          |
| AT2G31080 | na                                | transposable elk  | 2_13222225   | 3.8  | intergenic        |
| AT3G21890 | na                                | B-box type zinc   | 3_7711980    | 3.8  | proximal promoter |
| AT3G43580 | na                                | Beta-galactosid   | 3_15502719   | 3.8  | five_prime_UTR    |
| AT4G08151 | na                                | This gene encod   | 4_5155676    | 3.8  | intergenic        |
| AT4G21970 | na                                | Protein of unkn   | 4_11652695   | 3.8  | proximal promoter |
| AT5G11680 | na                                | FUNCTIONS IN      | 5_3761052    | 3.8  | downstream        |
| AT4G28600 | NO POLLEN GERMINATION RELATED 2   | encodes a calm    | 4_14129237   | 3.8  | promoter          |
| AT3G57520 | SEED IMBIBITION 2 (SIP2)          | SIP2 encodes a    | 3_21293190   | 3.8  | promoter          |
| AT5G66920 | SKU5 SIMILAR 17 (sks17)           | SKU5 similar      | 1_5_26722417 | 3.8  | promoter          |
| AT5G04040 | SUGAR-DEPENDENT 1 (SDP1)          | Encodes a triac   | 5_1089674    | 3.8  | five_prime_UTR    |
| AT2G31070 | TCP DOMAIN PROTEIN 10 (tcp10)     | TCP family prot   | 2_13222225   | 3.8  | five_prime_UTR    |
| AT5G11690 | TRANSLOCASE INNER MEMBRANE SU     | mitochondrial in  | 5_3761052    | 3.8  | promoter          |
| AT3G26420 | (ATRZ-1A)                         | Zinc finger-cont  | 3_9671460    | 3.79 | promoter          |
| AT5G16590 | (LRR1)                            | Leucine-rich rep  | 5_5431677    | 3.79 | promoter          |
| AT5G61000 | (RPA70D)                          | RPA70D; FUNC      | 5_24552908   | 3.79 | promoter          |
| AT1G75010 | ACCUMULATION AND REPLICATION OF   | Encodes ARC3      | 1_28164464   | 3.79 | intergenic        |
| AT5G65390 | ARABINO GALACTAN PROTEIN 7 (AGP7  | arabinogalactar   | 5_26130186   | 3.79 | proximal promoter |
| AT5G56870 | BETA-GALACTOSIDASE 4 (BGAL4)      | beta-galactosidi  | 5_23001305   | 3.79 | proximal promoter |
| AT5G62180 | CARBOXYESTERASE 20 (CXE20)        | carboxyesterasi   | 5_24978585   | 3.79 | intergenic        |
| AT5G10930 | CBL-INTERACTING PROTEIN KINASE 5  | Encodes CBL-ir    | 5_3444416    | 3.79 | intergenic        |
| AT4G22910 | FIZZY-RELATED 2 (FZR2)            | FIZZY-related     | 2_4_12012528 | 3.79 | promoter          |
| AT1G48620 | HIGH MOBILITY GROUP A5 (HONS5)    | This gene is pre  | 1_17976460   | 3.79 | promoter          |
| AT1G35515 | HIGH RESPONSE TO OSMOTIC STRESS   | Encodes a nucl    | 1_13079534   | 3.79 | three_prime_UTR   |
| AT4G22970 | HOMOLOG OF SEPARASE (ESP)         | Encodes a sepa    | 4_12043873   | 3.79 | promoter          |
| AT1G76135 | MICRORNA394B (MIR394B)            | Encodes a micr    | 1_28567152   | 3.79 | proximal promoter |
| AT1G35516 | na                                | myb-like transcr  | 1_13079534   | 3.79 | three_prime_UTR   |
| AT5G18310 | na                                | unknown proteir   | 5_6061876    | 3.79 | intron            |
| AT1G63140 | na                                | O-methyltransfe   | 1_23416257   | 3.79 | proximal promoter |
| AT1G75000 | na                                | GNS1/SUR4 me      | 1_28164464   | 3.79 | exon              |
| AT1G13940 | na                                | Plant protein of  | 1_4768978    | 3.79 | proximal promoter |
| AT2G44198 | na                                | unknown proteir   | 2_18276146   | 3.79 | exon              |
| AT2G31140 | na                                | Peptidase S24/    | 2_13269787   | 3.79 | promoter          |
| AT2G44200 | na                                | CBF1-interactin   | 2_18276146   | 3.79 | promoter          |
| AT3G26430 | na                                | GDSL-like Lipas   | 3_9671460    | 3.79 | promoter          |
| AT3G57370 | na                                | Cyclin family prc | 3_21228679   | 3.79 | promoter          |
| AT3G57380 | na                                | Glycosyltransfer  | 3_21228679   | 3.79 | proximal promoter |
| AT4G22980 | na                                | FUNCTIONS IN      | 4_12043873   | 3.79 | downstream        |
| AT5G57120 | na                                | FUNCTIONS IN      | 5_23124605   | 3.79 | promoter          |
| AT3G26410 | TRNA MODIFICATION 11 (TRM11)      | Encodes a prote   | 3_9671460    | 3.79 | promoter          |
| AT3G23670 | (KINESIN-12B)                     | Microtubule mol   | 3_8519017    | 3.78 | promoter          |

|           |                                    |                   |            |      |                   |
|-----------|------------------------------------|-------------------|------------|------|-------------------|
| AT3G55130 | ATP-BINDING CASSETTE G19 (ABCG19)  | Encodes a vac     | 3_20437425 | 3.78 | proximal promoter |
| AT1G78882 | CONSERVED PEPTIDE UPSTREAM OPE     | Upstream open     | 1_29656217 | 3.78 | promoter          |
| AT3G26330 | CYTOCHROME P450, FAMILY 71, SUBF   | putative cytochr  | 3_9649914  | 3.78 | proximal promoter |
| AT5G44210 | ERF DOMAIN PROTEIN 9 (ERF9)        | encodes a mem     | 5_17807645 | 3.78 | downstream        |
| AT3G53760 | GAMMA-TUBULIN COMPLEX PROTEIN 4    | Encodes GCP4      | 3_19922426 | 3.78 | promoter          |
| AT5G56030 | HEAT SHOCK PROTEIN 81-2 (HSP81-2)  | A member of he    | 5_22686767 | 3.78 | promoter          |
| AT5G39760 | HOMEOBOX PROTEIN 23 (HB23)         | homeobox prote    | 5_15911148 | 3.78 | promoter          |
| AT1G66760 | na                                 | MATE efflux fan   | 1_24904610 | 3.78 | downstream        |
| AT5G18920 | na                                 | Cox19-like CHC    | 5_6309931  | 3.78 | promoter          |
| AT2G25520 | na                                 | Drug/metabolite   | 2_10860185 | 3.78 | proximal promoter |
| AT1G13640 | na                                 | Phosphatidyli     | 1_4680248  | 3.78 | promoter          |
| AT1G72950 | na                                 | Disease resist    | 1_27444269 | 3.78 | promoter          |
| AT1G78880 | na                                 | Ubiquitin-specifi | 1_29656217 | 3.78 | promoter          |
| AT1G78890 | na                                 | unknown proteir   | 1_29656217 | 3.78 | promoter          |
| AT2G37050 | na                                 | Leucine-rich re   | 2_15568873 | 3.78 | promoter          |
| AT3G48140 | na                                 | B12D protein; C   | 3_17778294 | 3.78 | promoter          |
| AT3G49800 | na                                 | BSD domain-co     | 3_18473839 | 3.78 | promoter          |
| AT4G39930 | na                                 | unknown proteir   | 4_18518874 | 3.78 | exon              |
| AT5G36925 | na                                 | unknown proteir   | 5_14566454 | 3.78 | promoter          |
| AT3G02730 | THIOREDOXIN F-TYPE 1 (TRXF1)       | thioredoxin F-ty  | 3_589841   | 3.78 | promoter          |
| AT2G17790 | VPS35 HOMOLOG A (VPS35A)           | Encodes a prot    | 2_7733603  | 3.78 | promoter          |
| AT3G18035 | (HON4)                             | A linker histone  | 3_6171843  | 3.77 | promoter          |
| AT4G14720 | (PPD2)                             | PPD2 (and its p   | 4_8431938  | 3.77 | downstream        |
| AT4G14716 | ACIREDUCTONE DIOXYGENASE 1 (ARC    | Encodes an aci    | 4_8431938  | 3.77 | five_prime_UTR    |
| AT2G02000 | GLUTAMATE DECARBOXYLASE 3 (GAD     | glutamate decar   | 2_469071   | 3.77 | intergenic        |
| AT2G25295 | LOW-MOLECULAR-WEIGHT CYSTEINE-     | Encodes a mem     | 2_10771312 | 3.77 | intergenic        |
| AT1G11550 | na                                 | pre-tRNA; tRNA    | 1_3881491  | 3.77 | promoter          |
| AT1G31355 | na                                 | 60S ribosomal r   | 1_11226382 | 3.77 | proximal promoter |
| AT1G49580 | na                                 | Calcium-depend    | 1_18351380 | 3.77 | promoter          |
| AT1G80360 | na                                 | Pyridoxal phosp   | 1_30211768 | 3.77 | proximal promoter |
| AT2G01990 | na                                 | unknown proteir   | 2_469071   | 3.77 | proximal promoter |
| AT3G11600 | na                                 | unknown proteir   | 3_3666320  | 3.77 | proximal promoter |
| AT3G56820 | na                                 | unknown proteir   | 3_21041838 | 3.77 | promoter          |
| AT5G24570 | na                                 | unknown proteir   | 5_8406112  | 3.77 | five_prime_UTR    |
| AT5G18140 | na                                 | Chaperone Dna     | 5_5998161  | 3.77 | promoter          |
| AT3G57670 | NO TRANSMITTING TRACT (NTT)        | Encodes a C2      | 3_21367014 | 3.77 | intergenic        |
| AT3G53232 | ROTUNDIFOLIA LIKE 1 (RTFL1)        | ROTUNDIFOLIA      | 3_19728130 | 3.77 | intergenic        |
| AT1G68540 | TETRAKETIDE ALPHA-PYRONE REDUC     | NAD(P)-binding    | 1_25717925 | 3.77 | proximal promoter |
| AT3G56825 | U2 SMALL NUCLEOLAR RNA4 (U2.4)     | U2.4; snRNA; g    | 3_21041838 | 3.77 | exon              |
| AT1G11545 | XYLOGLUCAN ENDOTRANSGLUCOSYL       | xyloglucan end    | 1_3881491  | 3.77 | proximal promoter |
| AT3G11900 | AROMATIC AND NEUTRAL TRANSPORT     | encodes an ami    | 3_3758339  | 3.76 | promoter          |
| AT5G03540 | EXOCYST SUBUNIT EXO70 FAMILY PRC   | AiEXO70A1 is      | 5_889054   | 3.76 | proximal promoter |
| AT5G56860 | GATA, NITRATE-INDUCIBLE, CARBON N  | Encodes a mem     | 5_22992067 | 3.76 | proximal promoter |
| AT2G25950 | na                                 | CONTAINS Inte     | 2_11070810 | 3.76 | downstream        |
| AT2G25964 | na                                 | unknown proteir   | 2_11070810 | 3.76 | three_prime_UTR   |
| AT1G09750 | na                                 | Eukaryotic aspa   | 1_3158802  | 3.76 | exon              |
| AT3G04860 | na                                 | Plant protein of  | 3_1341089  | 3.76 | promoter          |
| AT2G43530 | na                                 | Encodes a defe    | 2_18070990 | 3.76 | intergenic        |
| AT2G43535 | na                                 | Encodes a defe    | 2_18070990 | 3.76 | five_prime_UTR    |
| AT5G21280 | na                                 | hydroxyproline-i  | 5_7265803  | 3.76 | promoter          |
| AT2G20410 | na                                 | RNA-binding A     | 2_8802299  | 3.76 | promoter          |
| AT2G34050 | na                                 | INVOLVED IN; i    | 2_14384276 | 3.76 | five_prime_UTR    |
| AT2G34060 | na                                 | Peroxidase sup    | 2_14384276 | 3.76 | proximal promoter |
| AT3G59850 | na                                 | Pectin lyase-like | 3_22112579 | 3.76 | proximal promoter |
| AT5G11070 | na                                 | unknown proteir   | 5_3514275  | 3.76 | intergenic        |
| AT5G04170 | na                                 | Calcium-binding   | 5_1145489  | 3.76 | five_prime_UTR    |
| AT4G28610 | PHOSPHATE STARVATION RESPONSE      | Similar to phosp  | 4_14135379 | 3.76 | promoter          |
| AT1G57990 | PURINE PERMEASE 18 (PUP18)         | Member of a far   | 1_21444546 | 3.76 | proximal promoter |
| AT5G03530 | RAB GTPASE HOMOLOG C2A (RABC2A     | Encodes a mem     | 5_889054   | 3.76 | proximal promoter |
| AT4G04220 | RECEPTOR LIKE PROTEIN 46 (RLP46)   | receptor like prc | 4_2033250  | 3.76 | promoter          |
| AT4G17230 | SCARECROW-LIKE 13 (SCL13)          | Encodes a scar    | 4_9665042  | 3.76 | proximal promoter |
| AT4G01470 | TONOPLAST INTRINSIC PROTEIN 1;3 (T | Encodes ATIP14    | 6_239957   | 3.76 | intergenic        |
| AT2G43520 | TRYP SIN INHIBITOR PROTEIN 2 (TI2) | Encodes putativ   | 2_18070990 | 3.76 | intergenic        |
| AT1G09760 | U2 SMALL NUCLEAR RIBONUCLEOPRC     | U2 small nuclea   | 1_3158802  | 3.76 | intergenic        |
| AT5G03455 | (CDC25)                            | Encodes a hom     | 5_864186   | 3.75 | downstream        |
| AT5G61790 | CALNEXIN 1 (CNX1)                  | calnexin 1 (CN    | 5_24829910 | 3.75 | promoter          |
| AT1G70782 | CONSERVED PEPTIDE UPSTREAM OPE     | Upstream open     | 1_26697479 | 3.75 | proximal promoter |
| AT2G29090 | CYTOCHROME P450, FAMILY 707, SUBF  | Encodes a prot    | 2_12495956 | 3.75 | intron            |
| AT2G29080 | FTSH PROTEASE 3 (ftsh3)            | encodes an Fts    | 2_12495956 | 3.75 | proximal promoter |
| AT1G78220 | GENERAL REGULATORY FACTOR 13 (C    | 14-3-3 protein C  | 1_29427903 | 3.75 | proximal promoter |
| AT3G20670 | HISTONE H2A 13 (HTA13)             | Encodes HTA13     | 3_7229346  | 3.75 | promoter          |
| AT1G15060 | na                                 | Uncharacterise    | 1_5186929  | 3.75 | five_prime_UTR    |
| AT3G27420 | na                                 | unknown proteir   | 3_10148491 | 3.75 | promoter          |
| AT3G51000 | na                                 | alpha/beta-Hydr   | 3_18946702 | 3.75 | promoter          |
| AT3G51010 | na                                 | unknown proteir   | 3_18946702 | 3.75 | three_prime_UTR   |
| AT2G38980 | na                                 | pseudogene, sir   | 2_16278619 | 3.75 | intron            |
| AT5G43960 | na                                 | Nuclear transpc   | 5_17691978 | 3.75 | promoter          |
| AT1G72120 | na                                 | Major facilitator | 1_27132042 | 3.75 | promoter          |
| AT2G24290 | na                                 | Protein of unknc  | 2_10338548 | 3.75 | promoter          |
| AT5G03460 | na                                 | unknown proteir   | 5_864186   | 3.75 | promoter          |
| AT5G11930 | na                                 | Thioredoxin sup   | 5_3847016  | 3.75 | proximal promoter |
| AT1G28380 | NECROTIC SPOTTED LESIONS 1 (NSL1   | This gene is pre  | 1_9963602  | 3.75 | five_prime_UTR    |
| AT1G69870 | NITRATE TRANSPORTER 1.7 (NRT1.7)   | Encodes a low     | 1_26314349 | 3.75 | proximal promoter |
| AT2G45790 | PHOSPHOMANNOMUTASE (PMM)           | encodes a phos    | 2_18855588 | 3.75 | promoter          |
| AT2G05620 | PROTON GRADIENT REGULATION 5 (P    | Involved in elec  | 2_2081994  | 3.75 | promoter          |
| AT2G40830 | RING-H2 FINGER C1A (RHC1A)         | Encodes a puta    | 2_17042543 | 3.75 | promoter          |
| AT1G66580 | SENESCENCE ASSOCIATED GENE 24 (    | senescence ass    | 1_24839085 | 3.75 | promoter          |
| AT2G23010 | SERINE CARBOXYPEPTIDASE-LIKE 9 (S  | serine carboxyp   | 2_9798178  | 3.75 | proximal promoter |
| AT5G43970 | TRANSLOCASE OF OUTER MEMBRANE      | Subunit of the T  | 5_17691978 | 3.75 | proximal promoter |
| AT1G61275 | U12 SMALL NUCLEOLAR RNA (U12)      | U12; snRNA; q     | 1_22603191 | 3.75 | exon              |
| AT1G78440 | ARABIDOPSIS THALIANA GIBBERELLIN   | Encodes a gibb    | 1_29514407 | 3.74 | proximal promoter |
| AT3G60250 | CASEIN KINASE II BETA CHAIN 3 (CKB | Regulatory (bet   | 3_22272299 | 3.74 | promoter          |
| AT5G45340 | CYTOCHROME P450, FAMILY 707, SUBF  | Encodes a prot    | 5_18377799 | 3.74 | intergenic        |
| AT3G54420 | HOMOLOG OF CARROT EP3-3 CHITINA    | encodes an EP     | 3_20145728 | 3.74 | promoter          |



|           |                                    |                    |              |      |                   |
|-----------|------------------------------------|--------------------|--------------|------|-------------------|
| AT2G38530 | LIPID TRANSFER PROTEIN 2 (LTP2)    | Involved in lipid  | 2_16127768   | 3.74 | proximal promoter |
| AT2G28405 | LOW-MOLECULAR-WEIGHT CYSTEINE-     | Encodes a mem      | 2_12154635   | 3.74 | proximal promoter |
| AT3G06520 | na                                 | agenet domain-     | 3_2019927    | 3.74 | promoter          |
| AT1G29660 | na                                 | GDSL-like Lipas    | 1_10371087   | 3.74 | proximal promoter |
| AT2G04795 | na                                 | unknown proteir    | 2_1682728    | 3.74 | promoter          |
| AT1G30600 | na                                 | Subtilase family   | 1_10845575   | 3.74 | proximal promoter |
| AT3G02080 | na                                 | Ribosomal prote    | 3_365363     | 3.74 | promoter          |
| AT3G09850 | na                                 | D111/G-patch d     | 3_3025937    | 3.74 | promoter          |
| AT3G09860 | na                                 | unknown proteir    | 3_3025937    | 3.74 | promoter          |
| AT3G57470 | na                                 | Insulinase (Pepi   | 3_21269106   | 3.74 | downstream        |
| AT3G57460 | na                                 | catalytic;metal    | 3_21269106   | 3.74 | intergenic        |
| AT4G03030 | na                                 | Galactose oxid     | 4_1337618    | 3.74 | promoter          |
| AT4G35240 | na                                 | Protein of unkn    | 4_16764570   | 3.74 | intron            |
| AT5G38096 | na                                 | Pseudogene of      | 5_15204243   | 3.74 | intron            |
| AT5G55530 | na                                 | Calcium-depend     | 5_22496058   | 3.74 | downstream        |
| AT5G11490 | na                                 | adaptin family     | p 5_3671701  | 3.74 | promoter          |
| AT5G57720 | na                                 | AP2/B3-like trar   | 5_23391942   | 3.74 | promoter          |
| AT5G07470 | PEPTIDEMETHIONINE SULFOXIDE RED    | ubiquitous enzy    | 5_2364357    | 3.74 | five_prime_UTR    |
| AT3G06510 | SENSITIVE TO FREEZING 2 (SFR2)     | Encodes a prote    | 3_2019927    | 3.74 | downstream        |
| AT3G26030 | SERINE/THREONINE PROTEIN PHOSPH    | protein phosph     | 3_9517226    | 3.74 | promoter          |
| AT5G54380 | THESEUS1 (THE1)                    | Encodes THESE1     | 5_22081800   | 3.74 | proximal promoter |
| AT3G10280 | 3-KETOACYL-COA SYNTHASE 14 (KCS1   | Encodes KCS1       | 3_3179892    | 3.73 | promoter          |
| AT3G62290 | ADP-RIBOSYLATION FACTOR A1E (ARF   | A member of AF     | 3_23051448   | 3.73 | promoter          |
| AT3G13970 | AUTOPHAGY 12 B (APG12B)            | AUTOPHAGY 1        | 3_4615428    | 3.73 | proximal promoter |
| AT3G10270 | DNA GYRASE B1 (GYRB1)              | Protein targetin   | 3_3179892    | 3.73 | promoter          |
| AT4G02350 | EXOCYST COMPLEX COMPONENT SEC      | Encodes a mem      | 4_1041039    | 3.73 | intergenic        |
| AT1G09420 | GLUCOSE-6-PHOSPHATE DEHYDROGE      | Encodes a prote    | 1_3038505    | 3.73 | three_prime_UTR   |
| AT1G64390 | GLYCOSYL HYDROLASE 9C2 (GH9C2)     | glycosyl hydrola   | 1_23908497   | 3.73 | proximal promoter |
| AT5G49230 | HYPERSENSITIVE TO RED AND BLUE (H  | Identified in a sc | 5_19960643   | 3.73 | promoter          |
| AT4G18010 | INOSITOL(1,4,5)P3 5-PHOSPHATASE II | Encodes an ino     | 4_9997827    | 3.73 | intergenic        |
| AT1G53790 | na                                 | F-box and asso     | 1_20081572   | 3.73 | promoter          |
| AT1G53800 | na                                 | unknown proteir    | 1_20081572   | 3.73 | promoter          |
| AT4G02360 | na                                 | Protein of unkn    | 4_1041039    | 3.73 | promoter          |
| AT3G62285 | na                                 | pre-tRNA; tRNA     | 3_23051448   | 3.73 | downstream        |
| AT2G28130 | na                                 | unknown proteir    | 2_11987912   | 3.73 | proximal promoter |
| AT1G09995 | na                                 | DNA repair DEF     | 1_3263774    | 3.73 | promoter          |
| AT1G10000 | na                                 | Ribonuclease H     | 1_3263774    | 3.73 | downstream        |
| AT1G21580 | na                                 | Zinc finger C-x8   | 1_7565894    | 3.73 | promoter          |
| AT1G33110 | na                                 | MATE efflux fan    | 1_12005887   | 3.73 | intron            |
| AT1G55604 | na                                 | Pseudogene of      | 1_20779264   | 3.73 | intergenic        |
| AT2G27315 | na                                 | Protein of unkn    | 2_11689344   | 3.73 | intergenic        |
| AT1G21590 | na                                 | Protein kinase     | 3_1_7565894  | 3.73 | intergenic        |
| AT1G26940 | na                                 | Cyclophilin-like   | 1_9343023    | 3.73 | promoter          |
| AT3G06660 | na                                 | PAPA-1-like fan    | 3_2102268    | 3.73 | promoter          |
| AT2G18690 | na                                 | unknown proteir    | 2_8102294    | 3.73 | intergenic        |
| AT4G17680 | na                                 | SBP (S-ribonuci    | 4_9842847    | 3.73 | downstream        |
| AT4G09620 | na                                 | Mitochondrial tr   | 4_6079186    | 3.73 | promoter          |
| AT4G38640 | na                                 | Plasma-membr       | 4_18059676   | 3.73 | three_prime_UTR   |
| AT5G01890 | na                                 | Leucine-rich rec   | 5_346568     | 3.73 | proximal promoter |
| AT5G23665 | na                                 | pre-tRNA; tRNA     | 5_7981462    | 3.73 | exon              |
| AT5G49215 | na                                 | Pectin lyase-like  | 5_19953062   | 3.73 | promoter          |
| AT1G09415 | NIM1-INTERACTING 3 (NIMIN-3)       | encodes a kinas    | 1_3038505    | 3.73 | promoter          |
| AT3G21865 | PEROXIN 22 (PEX22)                 | Interacts with PI  | 3_7703429    | 3.73 | promoter          |
| AT4G38630 | REGULATORY PARTICLE NON-ATPASE     | Regulatory parti   | 4_18059676   | 3.73 | promoter          |
| AT1G05460 | SILENCING DEFECTIVE (SDE3)         | Encodes a prote    | 1_1605068    | 3.73 | promoter          |
| AT3G56400 | WRKY DNA-BINDING PROTEIN 70 (WRK   | member of WR1      | 3_20912394   | 3.73 | proximal promoter |
| AT1G70490 | (ARFA1D)                           | A member of AF     | 1_26565846   | 3.72 | promoter          |
| AT2G17870 | COLD SHOCK DOMAIN PROTEIN 3 (CSF   | Encodes COLD       | 2_7765346    | 3.72 | promoter          |
| AT5G43060 | ESPONSIVE TO DEHYDRATION 21B (RE   | Granulin repeat    | 5_17271096   | 3.72 | intron            |
| AT3G50760 | GALACTURONOSYLTRANSFERASE-LIK      | Encodes a prote    | 3_18867979   | 3.72 | promoter          |
| AT5G56740 | HISTONE ACETYLTRANSFERASE OF TH    | Encodes an enz     | 5_22955778   | 3.72 | promoter          |
| AT5G25220 | KNOTTED1-LIKE HOMEBOX GENE 3 (H    | A member of clc    | 5_8738654    | 3.72 | downstream        |
| AT5G41900 | na                                 | alpha/beta-Hydr    | 5_16769360   | 3.72 | exon              |
| AT2G36090 | na                                 | F-box family prc   | 2_15159399   | 3.72 | exon              |
| AT5G06540 | na                                 | Pentatricopeptic   | 5_1998664    | 3.72 | intergenic        |
| AT5G39790 | na                                 | Encodes a chloi    | 5_15935334   | 3.72 | promoter          |
| AT3G17930 | na                                 | unknown proteir    | 3_6143385    | 3.72 | promoter          |
| AT4G27395 | na                                 | pre-tRNA; tRNA     | 4_13704781   | 3.72 | promoter          |
| AT1G03760 | na                                 | Prefoldin chape    | 1_943666     | 3.72 | promoter          |
| AT4G10820 | na                                 | F-box family prc   | 4_6649694    | 3.72 | proximal promoter |
| AT5G25230 | na                                 | Ribosomal prote    | 5_8738654    | 3.72 | proximal promoter |
| AT1G52750 | na                                 | alpha/beta-Hydr    | 1_19649419   | 3.72 | promoter          |
| AT1G63490 | na                                 | transcription fac  | 1_23553334   | 3.72 | proximal promoter |
| AT2G38870 | na                                 | Predicted to enc   | 2_16237928   | 3.72 | proximal promoter |
| AT2G43110 | na                                 | unknown proteir    | 2_17921840   | 3.72 | promoter          |
| AT5G13810 | na                                 | Glutaredoxin far   | 5_4455211    | 3.72 | promoter          |
| AT5G56745 | na                                 | pre-tRNA; tRNA     | 5_22955778   | 3.72 | promoter          |
| AT5G60580 | na                                 | RING/U-box sui     | 5_24353775   | 3.72 | promoter          |
| AT1G17890 | (GER2)                             | GER2; FUNCTI       | 1_6155860    | 3.71 | promoter          |
| AT1G06290 | ACYL-COA OXIDASE 3 (ACX3)          | Encodes an acy     | 1_1922191    | 3.71 | promoter          |
| AT4G25960 | ATP-BINDING CASSETTE B2 (ABCB2)    | P-glycoprotein     | 2_4_13175947 | 3.71 | proximal promoter |
| AT5G53290 | CYTOKININ RESPONSE FACTOR 3 (CRF   | encodes a mem      | 5_21613951   | 3.71 | intergenic        |
| AT3G02410 | ISOPRENLYCYSTEINE METHYLESTERA     | Isoprenylcysteir   | 3_492873     | 3.71 | intron            |
| AT3G14431 | na                                 | unknown proteir    | 3_4825616    | 3.71 | intergenic        |
| AT5G41100 | na                                 | FUNCTIONS IN       | 5_16447172   | 3.71 | promoter          |
| AT1G64450 | na                                 | Glycine-rich pro   | 1_23941873   | 3.71 | exon              |
| AT3G28220 | na                                 | TRAF-like fami     | 3_10524106   | 3.71 | promoter          |
| AT5G45350 | na                                 | proline-rich fami  | 5_18383982   | 3.71 | promoter          |
| AT2G45100 | na                                 | Cyclin/Brf1-like   | 2_18598528   | 3.71 | promoter          |
| AT4G18650 | na                                 | A maternally ex    | 4_10266573   | 3.71 | proximal promoter |
| AT2G41705 | na                                 | camphor resista    | 2_17396718   | 3.71 | proximal promoter |
| AT1G25510 | na                                 | Eukaryotic aspa    | 1_8959208    | 3.71 | three_prime_UTR   |
| AT3G07570 | na                                 | Cytochrome b5f     | 3_2420137    | 3.71 | exon              |
| AT3G24150 | na                                 | unknown proteir    | 3_8725948    | 3.71 | promoter          |

|           |                                   |                               |      |                   |
|-----------|-----------------------------------|-------------------------------|------|-------------------|
| AT3G21690 | na                                | MATE efflux fan 3_7640847     | 3.71 | exon              |
| AT3G57750 | na                                | Protein kinase s 3_21395497   | 3.71 | downstream        |
| AT3G57760 | na                                | Protein kinase s 3_21395497   | 3.71 | promoter          |
| AT4G34412 | na                                | CONTAINS inte 4_16454697      | 3.71 | promoter          |
| AT4G21745 | na                                | PAK-box/P21-R 4_11549680      | 3.71 | intron            |
| AT4G34415 | na                                | pre-tRNA; tRNA 4_16454697     | 3.71 | intron            |
| AT3G24160 | PUTATIVE TYPE 1 MEMBRANE PROTEIN  | Encodes a puta 3_8725948      | 3.71 | promoter          |
| AT5G13170 | SENESCENCE-ASSOCIATED GENE 29     | ( Encodes a merr 5_4189414    | 3.71 | intergenic        |
| AT3G19570 | SNOWY COTYLEDON 3 (SCO3)          | Encodes SCO3 3_6801872        | 3.71 | downstream        |
| AT4G18390 | TEOSINTE BRANCHED 1, CYCLOIDEA A  | TEOSINTE BR/ 4_10165756       | 3.71 | promoter          |
| AT3G19580 | ZINC-FINGER PROTEIN 2 (ZF2)       | Encodes zinc fir 3_6801872    | 3.71 | intergenic        |
| AT4G34700 | B22 SUBUNIT OF EUKARYOTIC MITOCH  | Encodes the B2 4_16559074     | 3.71 | downstream        |
| AT4G28540 | CASEIN KINASE I-LIKE 6 (CKL6)     | casein kinase I- 4_14106785   | 3.7  | promoter          |
| AT1G28430 | CYTOCHROME P450, FAMILY 705, SUBF | member of CYP 1_9989228       | 3.7  | intergenic        |
| AT3G02990 | HEAT SHOCK TRANSCRIPTION FACTOR   | member of Heat 3_673267       | 3.7  | promoter          |
| AT3G50890 | HOMEBOX PROTEIN 28 (HB28)         | homeobox prote 3_18916044     | 3.7  | promoter          |
| AT1G05100 | MITOGEN-ACTIVATED PROTEIN KINASE  | member of MEK 1_1469282       | 3.7  | promoter          |
| AT3G13530 | MITOGEN-ACTIVATED PROTEIN KINASE  | MAP3K epsilon 3_4419648       | 3.7  | promoter          |
| AT3G23250 | MYB DOMAIN PROTEIN 15 (MYB15)     | Member of the f 3_8307997     | 3.7  | proximal promoter |
| AT3G30170 | na                                | transposable elk 3_11798742   | 3.7  | intergenic        |
| AT1G01350 | na                                | Zinc finger (CC 1_136005      | 3.7  | promoter          |
| AT1G55960 | na                                | Polyketide cycl 1_20930056    | 3.7  | promoter          |
| AT1G55964 | na                                | pseudogene of 1_20930056      | 3.7  | proximal promoter |
| AT2G16250 | na                                | Leucine-rich rep 2_7043541    | 3.7  | proximal promoter |
| AT3G14200 | na                                | Chaperone Dna 3_4715264       | 3.7  | proximal promoter |
| AT3G44610 | na                                | Protein kinase s 3_16191477   | 3.7  | intron            |
| AT4G14740 | na                                | FUNCTIONS IN 4_8454024        | 3.7  | five_prime_UTR    |
| AT4G28564 | na                                | This gene encod 4_14117850    | 3.7  | intergenic        |
| AT5G19090 | na                                | Heavy metal tra 5_6385674     | 3.7  | proximal promoter |
| AT4G36090 | na                                | oxidoreductase, 4_17080871    | 3.7  | promoter          |
| AT3G16140 | PHOTOSYSTEM I SUBUNIT H-1 (PSAH-1 | Encodes subun 3_5470493       | 3.7  | proximal promoter |
| AT2G32660 | RECEPTOR LIKE PROTEIN 22 (RLP22)  | receptor like prc 2_13856276  | 3.7  | promoter          |
| AT5G43470 | RECOGNITION OF PERONOSPORA PAF    | Confers resistar 5_17466850   | 3.7  | intron            |
| AT4G11150 | VACUOLAR ATP SYNTHASE SUBUNIT E   | Encodes a vacu 4_6799830      | 3.7  | promoter          |
| AT1G69310 | WRKY DNA-BINDING PROTEIN 57 (WRK  | member of WR1 1_26058265      | 3.7  | promoter          |
| AT5G07500 | (PEI1)                            | Encodes an em 5_2372810       | 3.69 | exon              |
| AT3G48990 | ACYL-ACTIVATING ENZYME 3 (AAE3)   | Encodes an ox 3_18161465      | 3.69 | promoter          |
| AT4G21530 | ANAPHASE PROMOTING COMPLEX 4 (A   | Transducin/WD 4_11456015      | 3.69 | downstream        |
| AT2G38120 | AUXIN RESISTANT 1 (AUX1)          | Encodes an aux 2_15974281     | 3.69 | exon              |
| AT1G02730 | CELLULOSE SYNTHASE-LIKE D5 (CSLD  | Encodes a gene 1_598797       | 3.69 | promoter          |
| AT4G14510 | CRM FAMILY MEMBER 3B (CFM3B)      | Encodes a CRM 4_8341260       | 3.69 | promoter          |
| AT1G09350 | GALACTINOL SYNTHASE 3 (GoiS3)     | Predicted to enc 1_3018366    | 3.69 | proximal promoter |
| AT4G09500 | na                                | UDP-Glycosyltr 4_6017982      | 3.69 | promoter          |
| AT5G57060 | na                                | FUNCTIONS IN 5_23092244       | 3.69 | intergenic        |
| AT5G64710 | na                                | Putative endont 5_25869174    | 3.69 | promoter          |
| AT5G59770 | na                                | Protein-tyrosine 5_24079138   | 3.69 | intergenic        |
| AT5G63145 | na                                | pre-tRNA; tRNA 5_25330140     | 3.69 | downstream        |
| AT5G63150 | na                                | unknown protei 5_25330140     | 3.69 | promoter          |
| AT1G16820 | na                                | vacuolar ATP s 1_5758445      | 3.69 | exon              |
| AT1G33050 | na                                | unknown protei 1_11971110     | 3.69 | intron            |
| AT1G57840 | na                                | pseudogene, pt 1_21425608     | 3.69 | intron            |
| AT1G57850 | na                                | Toll-Interleukin-1 1_21425608 | 3.69 | intron            |
| AT1G78860 | na                                | curculin-like (m 1_29647931   | 3.69 | promoter          |
| AT1G78865 | na                                | 1_29647931                    | 3.69 | exon              |
| AT2G31141 | na                                | unknown protei 2_13272113     | 3.69 | exon              |
| AT2G31150 | na                                | ATP binding;AT 2_13272113     | 3.69 | promoter          |
| AT2G33585 | na                                | unknown protei 2_14224108     | 3.69 | exon              |
| AT2G33590 | na                                | NAD(P)-binding 2_14224108     | 3.69 | promoter          |
| AT2G36650 | na                                | unknown protei 2_15359476     | 3.69 | promoter          |
| AT1G33055 | na                                | unknown protei 1_11971110     | 3.69 | downstream        |
| AT3G01590 | na                                | Galactose muta 3_225848       | 3.69 | promoter          |
| AT3G08780 | na                                | unknown protei 3_2667549      | 3.69 | promoter          |
| AT2G31140 | na                                | Peptidase S24/ 2_13272113     | 3.69 | intergenic        |
| AT2G37220 | na                                | Encodes a chl 2_15633027      | 3.69 | intergenic        |
| AT3G23700 | na                                | Nucleic acid-bin 3_8533854    | 3.69 | promoter          |
| AT3G53730 | na                                | Histone superfa 3_19912379    | 3.69 | downstream        |
| AT3G53740 | na                                | Ribosomal prot 3_19912379     | 3.69 | intergenic        |
| AT4G11177 | na                                | pre-tRNA; tRNA 4_6819426      | 3.69 | downstream        |
| AT4G14520 | na                                | Protein of unkn 4_8341260     | 3.69 | promoter          |
| AT4G24920 | na                                | secE/sec61-gar 4_12820855     | 3.69 | promoter          |
| AT5G16030 | na                                | unknown protei 5_5235955      | 3.69 | proximal promoter |
| AT4G34400 | na                                | AP2/B3-like trar 4_16448511   | 3.69 | intergenic        |
| AT4G35670 | na                                | Pectin lyase-like 4_16914030  | 3.69 | proximal promoter |
| AT4G36750 | na                                | Quinone reduct 4_17324445     | 3.69 | promoter          |
| AT3G19180 | PARALOG OF ARC6 (PARC6)           | Encodes a chl 3_6632572       | 3.69 | promoter          |
| AT5G20360 | PHOX3 (Phox3)                     | Encodes one of 5_6881198      | 3.69 | intergenic        |
| AT3G17790 | PURPLE ACID PHOSPHATASE 17 (PAP1  | Expression is u 3_6088975     | 3.69 | proximal promoter |
| AT2G42800 | RECEPTOR LIKE PROTEIN 29 (RLP29)  | receptor like prc 2_17809919  | 3.69 | promoter          |
| AT4G21534 | SPHINGOSINE KINASE 2 (SPHK2)      | Diacylglycerol k 4_11456015   | 3.69 | promoter          |
| AT4G12040 | STRESS-ASSOCIATED PROTEIN 7 (SAP  | A20/AN1-like zif 4_7214554    | 3.69 | promoter          |
| AT1G71880 | SUCROSE-PROTON SYMPORTER 1 (SL    | Sucrose transp 1_27046320     | 3.69 | intergenic        |
| AT5G20350 | TIP GROWTH DEFECTIVE 1 (TIP1)     | Encodes a prot 5_6881198      | 3.69 | three_prime_UTR   |
| AT1G63780 | (IMP4)                            | Small nucleolar 1_23667401    | 3.68 | promoter          |
| AT3G21250 | ATP-BINDING CASSETTE C8 (ABCC8)   | member of MRF 3_7463811       | 3.68 | promoter          |
| AT3G01640 | GLUCURONOKINASE G (GLCAK)         | AtGlcAK is a su 3_239291      | 3.68 | promoter          |
| AT3G21260 | GLYCOLIPID TRANSFER PROTEIN 3 (G  | l) Glycolipid tran 3_7463811  | 3.68 | downstream        |
| AT4G16143 | IMPORTIN ALPHA ISOFORM 2 (IMPA-2) | Protein interact 4_9133262    | 3.68 | intergenic        |
| AT3G03310 | LECITHIN:CHOLESTEROL ACYLTRANSF   | lecithin:choleste 3_781655    | 3.68 | promoter          |
| AT4G11330 | MAP KINASE 5 (MPK5)               | MAP kinase 4_6890682          | 3.68 | proximal promoter |
| AT5G14565 | MICRORNA398C (MIR398C)            | Encodes a micr 5_4694185      | 3.68 | promoter          |
| AT1G12030 | na                                | Protein of unkn 1_4066925     | 3.68 | proximal promoter |
| AT3G03320 | na                                | RNA-binding A 3_781655        | 3.68 | promoter          |
| AT4G37180 | na                                | myb family trans 4_17504491   | 3.68 | promoter          |
| AT5G09876 | na                                | unknown protei 5_3080574      | 3.68 | downstream        |

|           |    |                                            |                   |              |                   |                   |
|-----------|----|--------------------------------------------|-------------------|--------------|-------------------|-------------------|
| AT2G22200 | na | encodes a mem                              | 2_9444463         | 3.68         | promoter          |                   |
| AT2G22201 | na | unknown proteir                            | 2_9444463         | 3.68         | promoter          |                   |
| AT4G31330 | na | Protein of unkn                            | 4_15203600        | 3.68         | downstream        |                   |
| AT1G15885 | na | unknown proteir                            | 1_5460458         | 3.68         | promoter          |                   |
| AT1G63790 | na | pre-tRNA; tRNA                             | 1_23667401        | 3.68         | downstream        |                   |
| AT1G67460 | na | Minichromosom                              | 1_25272129        | 3.68         | promoter          |                   |
| AT1G67470 | na | Protein kinase s                           | 1_25272129        | 3.68         | promoter          |                   |
| AT1G03520 | na | Core-2/l-branch                            | 1_880203          | 3.68         | promoter          |                   |
| AT3G15548 | na | unknown proteir                            | 3_5266703         | 3.68         | promoter          |                   |
| AT3G50850 | na | Putative methyl                            | 3_18905078        | 3.68         | proximal promoter |                   |
| AT4G16141 | na | GATA type zinc                             | 4_9133262         | 3.68         | promoter          |                   |
| AT5G14550 | na | Core-2/l-branch                            | 5_4694185         | 3.68         | promoter          |                   |
| AT5G46170 | na | F-box family prc                           | 5_18718108        | 3.68         | proximal promoter |                   |
| AT4G39230 | na | encodes a prote                            | 4_18267875        | 3.68         | promoter          |                   |
| AT5G14560 | na | unknown proteir                            | 5_4694185         | 3.68         | downstream        |                   |
| AT5G37010 | na | unknown proteir                            | 5_14623133        | 3.68         | promoter          |                   |
| AT5G46180 | na | ORNITHINE-DELTA-AMINOTRANSFERASE           | Encodes an orn    | 5_18718108   | 3.68              | intergenic        |
| AT2G05100 | na | PHOTOSYSTEM II LIGHT HARVESTING            | Lhcb2.1 protein   | 2_1824482    | 3.68              | promoter          |
| AT1G80480 | na | PLASTID TRANSCRIPTIONALLY ACTIVE           | plastid transcrip | 1_30260773   | 3.68              | promoter          |
| AT1G80490 | na | TOPLESS-RELATED 1 (TPR1)                   | TOPLESS-relat     | 1_30260773   | 3.68              | downstream        |
| AT5G59300 | na | UBIQUITIN CARRIER PROTEIN 7 (UBC7)         | ubiquitin conjug  | 5_23921308   | 3.68              | promoter          |
| AT1G63800 | na | UBIQUITIN-CONJUGATING ENZYME 5 (UBC5)      | ubiquitin-conjug  | 1_23667401   | 3.68              | downstream        |
| AT3G50740 | na | UDP-GLUCOSYL TRANSFERASE 72E1 (UGT72E1)    | UGT72E1 is an     | 3_18855325   | 3.68              | three_prime_UTR   |
| AT3G51820 | na | (G4)                                       | Encodes a prot    | 3_19219109   | 3.67              | promoter          |
| AT5G13490 | na | ADP/ATP CARRIER 2 (AAC2)                   | Encodes mitoch    | 5_4337764    | 3.67              | downstream        |
| AT3G22370 | na | ALTERNATIVE OXIDASE 1A (AOX1A)             | Encodes AOX1;     | 3_7908730    | 3.67              | three_prime_UTR   |
| AT3G51920 | na | CALMODULIN 9 (CAM9)                        | encodes a diver   | 3_19269530   | 3.67              | promoter          |
| AT1G64390 | na | GLYCOSYL HYDROLASE 9C2 (GH9C2)             | glycosyl hydrola  | 1_23905671   | 3.67              | intergenic        |
| AT1G31140 | na | GORDITA (GOA)                              | Encodes a B-si    | 1_11119698   | 3.67              | three_prime_UTR   |
| AT2G18960 | na | H(+)-ATPASE 1 (HA1)                        | Encodes a plasi   | 2_8219934    | 3.67              | proximal promoter |
| AT2G18550 | na | HOMEODOMAIN PROTEIN 21 (HB21)              | Encodes a hom     | 2_8053452    | 3.67              | proximal promoter |
| AT3G08770 | na | LIPID TRANSFER PROTEIN 6 (LTP6)            | Predicted to enc  | 3_2664926    | 3.67              | promoter          |
| AT4G23850 | na | LONG-CHAIN ACYL-COA SYNTHETASE             | long-chain acyl-  | 4_12408313   | 3.67              | five_prime_UTR    |
| AT3G46580 | na | METHYL-CPG-BINDING DOMAIN PROTEIN 3 (MCP3) | Protein containi  | 3_17149829   | 3.67              | intergenic        |
| AT2G38325 | na | MICRORNA390A (MIR390A)                     | Encodes a micr    | 2_16062580   | 3.67              | intergenic        |
| AT1G32730 | na |                                            | unknown proteir   | 1_11840872   | 3.67              | promoter          |
| AT3G05160 | na |                                            | Major facilitator | 3_1457160    | 3.67              | promoter          |
| AT5G38005 | na |                                            | Unknown gene      | 5_15151689   | 3.67              | intergenic        |
| AT5G10730 | na |                                            | NAD(P)-binding    | 5_3393207    | 3.67              | promoter          |
| AT5G04500 | na |                                            | a member of the   | 5_1283252    | 3.67              | promoter          |
| AT1G19485 | na |                                            | Transducin/WD     | 1_6746714    | 3.67              | promoter          |
| AT1G05380 | na |                                            | Acyl-CoA N-acy    | 1_1576743    | 3.67              | promoter          |
| AT1G31150 | na |                                            | FUNCTIONS IN      | 1_11119698   | 3.67              | promoter          |
| AT3G46585 | na |                                            | pre-tRNA; tRNA    | 3_17149829   | 3.67              | downstream        |
| AT3G59870 | na |                                            | unknown proteir   | 3_22118334   | 3.67              | promoter          |
| AT4G23882 | na |                                            | Heavy metal tra   | 4_12419266   | 3.67              | intergenic        |
| AT4G23885 | na |                                            | unknown proteir   | 4_12419266   | 3.67              | promoter          |
| AT5G25615 | na |                                            | transposable elk  | 5_8927285    | 3.67              | proximal promoter |
| AT5G04840 | na |                                            | bZIP protein; FL  | 5_1405175    | 3.67              | promoter          |
| AT5G13500 | na |                                            | unknown proteir   | 5_4337764    | 3.67              | promoter          |
| AT5G15260 | na |                                            | Ribosomal prote   | 5_4955167    | 3.67              | promoter          |
| AT5G41920 | na |                                            | GRAS family tra   | 5_16781030   | 3.67              | exon              |
| AT5G66790 | na |                                            | Protein kinase s  | 5_26667690   | 3.67              | downstream        |
| AT1G25380 | na | NAD+ TRANSPORTER 2 (NDT2)                  | Encodes a mito    | 1_8903423    | 3.67              | promoter          |
| AT5G06690 | na | WCRKC THIOREDOXIN 1 (WCRKC1)               | Encodes a thior   | 5_2061989    | 3.67              | promoter          |
| AT2G40950 | na | (BZIP17)                                   | bZIP17 appears    | 2_17087328   | 3.66              | intergenic        |
| AT5G16390 | na | CHLOROPLASTIC ACETYLCOENZYME A (ACCA)      | Encodes for the   | 5_5360763    | 3.66              | downstream        |
| AT2G23980 | na | CYCLIC NUCLEOTIDE-GATED CHANNEL 1 (CNG1)   | member of Cycl    | 2_10204907   | 3.66              | promoter          |
| AT3G47500 | na | CYCLING DOF FACTOR 3 (CDF3)                | Dof-type zinc fir | 3_17506131   | 3.66              | promoter          |
| AT3G21270 | na | DOF ZINC FINGER PROTEIN 2 (DOF2)           | Encodes Dof zir   | 3_7477504    | 3.66              | intergenic        |
| AT2G40940 | na | ETHYLENE RESPONSE SENSOR 1 (ERS1)          | Ethylene recept   | 2_17087328   | 3.66              | promoter          |
| AT4G37840 | na | HEXOKINASE-LIKE 3 (HKL3)                   | Encodes a puta    | 4_17792687   | 3.66              | promoter          |
| AT3G21220 | na | MAP KINASE KINASE 5 (MKK5)                 | Encodes a mito    | 3_7445675    | 3.66              | promoter          |
| AT2G35630 | na | MICROTUBULE ORGANIZATION 1 (MOR1)          | Member of the     | 1_2_14966626 | 3.66              | promoter          |
| AT1G60970 | na |                                            | SNARE-like sur    | 1_22449687   | 3.66              | promoter          |
| AT1G64618 | na |                                            | other RNA         | 1_24005833   | 3.66              | promoter          |
| AT1G71866 | na |                                            | LOCATED IN:       | e_1_27031293 | 3.66              | five_prime_UTR    |
| AT2G18750 | na |                                            | Calmodulin-bin    | 2_8125508    | 3.66              | intron            |
| AT2G23985 | na |                                            | unknown proteir   | 2_10204907   | 3.66              | promoter          |
| AT2G28940 | na |                                            | Protein kinase s  | 2_12430332   | 3.66              | proximal promoter |
| AT3G01450 | na |                                            | ARM repeat sur    | 3_172042     | 3.66              | promoter          |
| AT3G13430 | na |                                            | RING/U-box sur    | 3_4367130    | 3.66              | promoter          |
| AT3G16117 | na |                                            | unknown proteir   | 3_5464623    | 3.66              | exon              |
| AT5G16380 | na |                                            | Protein of unkn   | 5_5360763    | 3.66              | promoter          |
| AT5G41850 | na |                                            | alpha/beta-Hydr   | 5_16758036   | 3.66              | five_prime_UTR    |
| AT5G41860 | na |                                            | unknown proteir   | 5_16758036   | 3.66              | five_prime_UTR    |
| AT1G12710 | na | PHLOEM PROTEIN 2-A12 (PP2-A12)             | This gene is pre  | 1_4328548    | 3.66              | promoter          |
| AT1G10940 | na | SNF1-RELATED PROTEIN KINASE 2.4 (SNF2.4)   | Encodes a plan    | 1_3658668    | 3.66              | promoter          |
| AT1G10950 | na | TRANSMEMBRANE NINE 1 (TMN1)                | Encodes an Ara    | 1_3658668    | 3.66              | proximal promoter |
| AT3G21280 | na | UBIQUITIN-SPECIFIC PROTEASE 7 (UBF7)       | Encodes a ubiq    | 3_7477504    | 3.66              | intergenic        |
| AT1G78700 | na | BES1/BZR1 HOMOLOG 4 (BEH4)                 | BES1/BZR1 hor     | 1_29602118   | 3.65              | intergenic        |
| AT1G26560 | na | BETA GLUCOSIDASE 40 (BGLU40)               | beta glucosidas   | 1_9179346    | 3.65              | intron            |
| AT1G32790 | na | CTC-INTERACTING DOMAIN 11 (CID11)          | RNA-binding pri   | 1_11877408   | 3.65              | promoter          |
| AT4G11140 | na | CYTOKININ RESPONSE FACTOR 1 (CRF1)         | encodes a mem     | 4_6797665    | 3.65              | proximal promoter |
| AT5G09440 | na | EXORDIUM LIKE 4 (EXL4)                     | EXORDIUM like     | 5_2941678    | 3.65              | intergenic        |
| AT4G31750 | na | HOPW1-1-INTERACTING 2 (WIN2)               | Encodes HopW      | 4_15367944   | 3.65              | promoter          |
| AT1G73500 | na | MAP KINASE KINASE 9 (MKK9)                 | member of MAF     | 1_27640466   | 3.65              | five_prime_UTR    |
| AT4G31760 | na |                                            | Peroxidase sup    | 4_15367944   | 3.65              | downstream        |
| AT1G62422 | na |                                            | unknown proteir   | 1_23101134   | 3.65              | promoter          |
| AT3G49970 | na |                                            | Phototropic-res   | 3_18530048   | 3.65              | proximal promoter |
| AT3G53640 | na |                                            | Protein kinase s  | 3_19889162   | 3.65              | promoter          |
| AT4G03030 | na |                                            | Galactose oxid    | 4_1338672    | 3.65              | proximal promoter |
| AT4G31290 | na |                                            | ChaC-like famil   | 4_15185952   | 3.65              | five_prime_UTR    |
| AT5G09450 | na |                                            | Tetratricopeptid  | 5_2941678    | 3.65              | promoter          |

|           |                                    |                               |      |                   |
|-----------|------------------------------------|-------------------------------|------|-------------------|
| AT4G31280 | na                                 | unknown proteir 4_15185952    | 3.65 | five_prime_UTR    |
| AT5G05795 | na                                 | pre-tRNA; tRNA 5_1742677      | 3.65 | promoter          |
| AT5G07800 | na                                 | Flavin-binding n 5_2487398    | 3.65 | exon              |
| AT5G09443 | na                                 | Potential natura 5_2941678    | 3.65 | proximal promoter |
| AT5G09445 | na                                 | unknown proteir 5_2941678     | 3.65 | intergenic        |
| AT3G56710 | SIGMA FACTOR BINDING PROTEIN 1 (S  | Sig1 binding prc 3_21000919   | 3.65 | proximal promoter |
| AT1G78710 | TRICHOME BIREFRINGENCE-LIKE 42 (T  | Encodes a merr 1_29602118     | 3.65 | intron            |
| AT3G13300 | VARICOSE (VCS)                     | Encodes VCS (3_4303712        | 3.65 | promoter          |
| AT2G39190 | (ATATH8)                           | member of ATH 2_16349999      | 3.64 | five_prime_UTR    |
| AT4G10920 | (KELP)                             | Transcriptional r 4_6696287   | 3.64 | intergenic        |
| AT3G52090 | (NRPB11)                           | Non-catalytic su 3_19319233   | 3.64 | promoter          |
| AT5G66690 | (UGT72E2)                          | UGT72E2 is an 5_26628555      | 3.64 | intergenic        |
| AT5G65800 | ACC SYNTHASE 5 (ACS5)              | 1-aminocycloprc 5_26333913    | 3.64 | proximal promoter |
| AT2G13360 | ALANINE:GLYOXYLATE AMINOTRANSF     | Encodes a pero 2_5541466      | 3.64 | promoter          |
| AT2G28350 | AUXIN RESPONSE FACTOR 10 (ARF10)   | Involved in root 2_12112782   | 3.64 | proximal promoter |
| AT2G27220 | BEL1-LIKE HOMEODOMAIN 5 (BLH5)     | BEL1-like home 2_11644215     | 3.64 | intergenic        |
| AT2G26980 | CBL-INTERACTING PROTEIN KINASE 3   | encodes a serin 2_11518573    | 3.64 | intron            |
| AT2G20190 | CLIP-ASSOCIATED PROTEIN (CLASP)    | Encodes a micr 2_8711757      | 3.64 | three_prime_UTR   |
| AT2G44810 | DEFECTIVE ANTHR DEHISCENCE 1 (D    | Mutant has defe 2_18480600    | 3.64 | intergenic        |
| AT1G21390 | EMBRYO DEFECTIVE 2170 (emb2170)    | embryo defectiv 1_7491360     | 3.64 | proximal promoter |
| AT4G04020 | FIBRILLIN (FIB)                    | Fibrillin precurs 4_1931817   | 3.64 | promoter          |
| AT3G26640 | LIGHT-REGULATED WD 2 (LWD2)        | Encodes LIGHT 3_9793096       | 3.64 | promoter          |
| AT4G30074 | LOW-MOLECULAR-WEIGHT CYSTEINE-     | Encodes a merr 4_14701704     | 3.64 | proximal promoter |
| AT5G62470 | MYB DOMAIN PROTEIN 96 (MYB96)      | Encodes a R2R 5_25084960      | 3.64 | intergenic        |
| AT1G16180 | na                                 | Serinc-domain c 1_5543096     | 3.64 | downstream        |
| AT2G10940 | na                                 | Bifunctional inhi 2_4312150   | 3.64 | promoter          |
| AT3G22550 | na                                 | Protein of unknk 3_7990376    | 3.64 | intergenic        |
| AT5G17650 | na                                 | glycine/proline-r 5_5818667   | 3.64 | promoter          |
| AT5G17660 | na                                 | tRNA (guanine- 5_5818667      | 3.64 | three_prime_UTR   |
| AT5G27730 | na                                 | Protein of unknk 5_9820018    | 3.64 | promoter          |
| AT5G58510 | na                                 | unknown proteir 5_23654638    | 3.64 | promoter          |
| AT1G32620 | na                                 | pre-tRNA; tRNA 1_11797316     | 3.64 | promoter          |
| AT1G32630 | na                                 | unknown proteir 1_11797316    | 3.64 | promoter          |
| AT3G10035 | na                                 | pre-tRNA; tRNA 3_3096240      | 3.64 | exon              |
| AT3G15115 | na                                 | unknown proteir 3_5088200     | 3.64 | proximal promoter |
| AT3G26630 | na                                 | Tetratricopeptid 3_9793096    | 3.64 | promoter          |
| AT3G10040 | na                                 | sequence-speci 3_3096240      | 3.64 | downstream        |
| AT3G15120 | na                                 | P-loop containir 3_5088200    | 3.64 | downstream        |
| AT3G52100 | na                                 | RING/FYVE/PH 3_19319233       | 3.64 | promoter          |
| AT3G60480 | na                                 | unknown proteir 3_22348478    | 3.64 | promoter          |
| AT3G60490 | na                                 | encodes a mem 3_22348478      | 3.64 | proximal promoter |
| AT3G62528 | na                                 | This gene encoi 3_23131374    | 3.64 | downstream        |
| AT3G62529 | na                                 | pseudogene of j 3_23131374    | 3.64 | promoter          |
| AT4G10910 | na                                 | unknown proteir 4_6696287     | 3.64 | promoter          |
| AT4G18725 | na                                 | pre-tRNA; tRNA 4_10302090     | 3.64 | downstream        |
| AT4G36270 | na                                 | ATP binding; BE 4_17165289    | 3.64 | promoter          |
| AT4G35730 | na                                 | Regulator of Vp 4_16930910    | 3.64 | promoter          |
| AT4G36280 | na                                 | Histidine kinase 4_17165289   | 3.64 | downstream        |
| AT5G55220 | na                                 | trigger factor tyr 5_22397477 | 3.64 | promoter          |
| AT5G57790 | na                                 | unknown proteir 5_23413997    | 3.64 | promoter          |
| AT5G12460 | na                                 | Protein of unknk 5_4042198    | 3.64 | proximal promoter |
| AT5G16110 | na                                 | unknown proteir 5_5262565     | 3.64 | exon              |
| AT5G25010 | na                                 | Protein of unknk 5_8616064    | 3.64 | exon              |
| AT5G37550 | na                                 | unknown proteir 5_14916779    | 3.64 | intergenic        |
| AT5G47250 | na                                 | LRP and NB-AF 5_19188854      | 3.64 | promoter          |
| AT5G55210 | na                                 | unknown proteir 5_22397477    | 3.64 | promoter          |
| AT2G20180 | PHYTOCHROME INTERACTING FACTO      | Encodes a nove 2_8711757      | 3.64 | intergenic        |
| AT1G16190 | RADIATION SENSITIVE23A (RAD23A)    | Encodes a merr 1_5543096      | 3.64 | promoter          |
| AT4G18730 | RIBOSOMAL PROTEIN L16B (RPL16B)    | encodes a cytos 4_10302090    | 3.64 | promoter          |
| AT5G43880 | TON1 RECRUITING MOTIF 21 (TRM21)   | Protein of unknk 5_17643671   | 3.64 | promoter          |
| AT3G26520 | TONOPLAST INTRINSIC PROTEIN 2 (TIP | gamma tonopla: 3_9719835      | 3.64 | intergenic        |
| AT1G04820 | TUBULIN ALPHA-4 CHAIN (TUA4)       | Encodes an alp 1_1358436      | 3.64 | promoter          |
| AT5G57160 | (ATLIG4)                           | Encodes the Ar: 5_23154224    | 3.63 | intergenic        |
| AT5G26340 | (MSS1)                             | Encodes a prot 5_9245287      | 3.63 | intron            |
| AT4G25650 | ACD1-LIKE (ACD1-LIKE)              | Similar to ACD1 4_13083283    | 3.63 | promoter          |
| AT2G37550 | ARF-GAP DOMAIN 7 (AGD7)            | A member of Af 2_15757612     | 3.63 | promoter          |
| AT1G48790 | ASSOCIATED MOLECULE WITH THE SH    | associated mole 1_18047637    | 3.63 | five_prime_UTR    |
| AT3G30180 | BRASSINOSTEROID-6-OXIDASE 2 (BR6)  | Encodes a cyto 3_11812870     | 3.63 | intron            |
| AT4G23180 | CYSTEINE-RICH RLK (RECEPTOR-LIKE   | Encodes a rece 4_12138159     | 3.63 | five_prime_UTR    |
| AT4G23190 | CYSTEINE-RICH RLK (RECEPTOR-LIKE   | Encodes putativ 4_12138159    | 3.63 | intergenic        |
| AT4G31820 | ENHANCER OF PINOID (ENP)           | A member of the 4_15393075    | 3.63 | intron            |
| AT3G13060 | EVOLUTIONARILY CONSERVED C-TER     | evolutionarily cc 3_4180338   | 3.63 | promoter          |
| AT4G34460 | GTP BINDING PROTEIN BETA 1 (AGB1)  | Encodes the he 4_16479478     | 3.63 | five_prime_UTR    |
| AT2G02080 | INDETERMINATE(ID)-DOMAIN 4 (IDD4)  | indeterminate(I 2_521842      | 3.63 | promoter          |
| AT2G43680 | IQ-DOMAIN 14 (IQD14)               | IQ-domain 14 (I 2_18108193    | 3.63 | promoter          |
| AT2G29130 | LACCASE 2 (LAC2)                   | putative laccase 2_12525667   | 3.63 | exon              |
| AT2G37555 | na                                 | Potential natura 2_15757612   | 3.63 | exon              |
| AT1G10640 | na                                 | Pectin lyase-like 1_3519132   | 3.63 | proximal promoter |
| AT4G21910 | na                                 | MATE efflux fan 4_11625225    | 3.63 | downstream        |
| AT4G21903 | na                                 | MATE efflux fan 4_11625225    | 3.63 | proximal promoter |
| AT2G23650 | na                                 | pre-tRNA; tRNA 2_10059437     | 3.63 | downstream        |
| AT3G14800 | na                                 | transposable elk 3_4970325    | 3.63 | promoter          |
| AT5G04390 | na                                 | C2H2-type zinc 5_1240585      | 3.63 | downstream        |
| AT5G56061 | na                                 | Pseudogene of 5_22706079      | 3.63 | promoter          |
| AT5G57150 | na                                 | basic helix-loop 5_23154224   | 3.63 | intron            |
| AT5G04400 | NAC DOMAIN CONTAINING PROTEIN 77   | NAC domain co 5_1240585       | 3.63 | proximal promoter |
| AT4G30810 | SERINE CARBOXYPEPTIDASE-LIKE 29 (  | serine carboxyp 4_15003066    | 3.63 | promoter          |
| AT1G60940 | SNF1-RELATED PROTEIN KINASE 2.10   | encodes a mem 1_22442311      | 3.63 | promoter          |
| AT4G21540 | SPHINGOSINE KINASE 1 (SPHK1)       | Encodes a sphii 4_11459465    | 3.63 | promoter          |
| AT2G28520 | VACUOLAR PROTON ATPASE A1 (VHA-    | Vacuolar proton 2_12205811    | 3.63 | intergenic        |
| AT2G04842 | EMBRYO DEFECTIVE 2761 (EMB2761)    | Encodes a dual 2_1701416      | 3.62 | promoter          |
| AT5G61020 | EVOLUTIONARILY CONSERVED C-TER     | evolutionarily cc 5_24559872  | 3.62 | five_prime_UTR    |
| AT2G02540 | HOMEODOMAIN PROTEIN 21 (HB21)      | Zinc finger hom 2_681439      | 3.62 | proximal promoter |
| AT4G22670 | HSP70-INTERACTING PROTEIN 1 (HIP1) | Encodes one of 4_11918002     | 3.62 | promoter          |

|           |                                     |                              |      |                   |
|-----------|-------------------------------------|------------------------------|------|-------------------|
| AT4G32551 | LEUNIG (LUG)                        | LEUNIG regulat 4_15707190    | 3.62 | promoter          |
| AT2G47190 | MYB DOMAIN PROTEIN 2 (MYB2)         | Encodes a MYE 2_19377308     | 3.62 | three_prime_UTR   |
| AT3G23910 | na                                  | BEST Arabidop: 3_8640338     | 3.62 | proximal promoter |
| AT1G07940 | na                                  | GTP binding Elc 1_2462220    | 3.62 | intergenic        |
| AT2G20050 | na                                  | protein serine/th 2_8656435  | 3.62 | proximal promoter |
| AT1G24350 | na                                  | Acid phosphata: 1_8640639    | 3.62 | five_prime_UTR    |
| AT1G24360 | na                                  | NAD(P)-binding 1_8640639     | 3.62 | five_prime_UTR    |
| AT2G02600 | na                                  | pre-tRNA; tRNA 2_706881      | 3.62 | downstream        |
| AT2G23090 | na                                  | Uncharacteriser 2_9830430    | 3.62 | promoter          |
| AT3G22810 | na                                  | FUNCTIONS IN 3_8067823       | 3.62 | proximal promoter |
| AT3G59660 | na                                  | C2 domain-cont 3_22038736    | 3.62 | promoter          |
| AT3G60805 | na                                  | pre-tRNA; tRNA 3_22470393    | 3.62 | promoter          |
| AT4G22666 | na                                  | Bifunctional inhi 4_11918002 | 3.62 | downstream        |
| AT5G01670 | na                                  | NAD(P)-linked c 5_251611     | 3.62 | promoter          |
| AT5G65030 | na                                  | unknown proteir 5_25976869   | 3.62 | proximal promoter |
| AT3G14440 | NINE-CIS-EPOXYCAROTENOID DIOXYG     | Encodes 9-cis-ε 3_4839004    | 3.62 | intergenic        |
| AT1G30100 | NINE-CIS-EPOXYCAROTENOID DIOXYG     | Encodes 9-cis-ε 1_10574560   | 3.62 | intergenic        |
| AT1G77760 | NITRATE REDUCTASE 1 (NIA1)          | Encodes the cy1_29239495     | 3.62 | promoter          |
| AT1G80770 | PIGMENT DEFECTIVE 318 (PDE318)      | pigment defectiv 1_30355035  | 3.62 | promoter          |
| AT2G22190 | TREHALOSE-6-PHOSPHATE PHOSPHA       | Haloaloid dehalc 2_9436793   | 3.62 | promoter          |
| AT5G05860 | UDP-GLUCOSYL TRANSFERASE 76C2 (     | Encodes a cytol 5_1765374    | 3.62 | promoter          |
| AT3G11730 | (ATFP8)                             | Encodes a merr 3_3708693     | 3.61 | intergenic        |
| AT4G22780 | ACT DOMAIN REPEAT 7 (ACR7)          | Member of a far 4_11968539   | 3.61 | three_prime_UTR   |
| AT4G26570 | CALCINEURIN B-LIKE 3 (CBL3)         | member of AtCε 4_13411249    | 3.61 | promoter          |
| AT3G10600 | CATIONIC AMINO ACID TRANSPORTER     | Encodes a merr 3_3315687     | 3.61 | intron            |
| AT1G66160 | CYS, MET, PRO, AND GLY PROTEIN 1 (C | CYS, MET, PRC 1_24634646     | 3.61 | proximal promoter |
| AT4G33240 | FORMS APOID AND BINUCLEATE CEL      | Encodes a prot 4_16038577    | 3.61 | proximal promoter |
| AT1G15550 | GIBBERELLIN 3-OXIDASE 1 (GA3OX1)    | Involved in later 1_5345049  | 3.61 | exon              |
| AT5G18170 | GLUTAMATE DEHYDROGENASE 1 (GDH)     | Encodes the 43 5_6006041     | 3.61 | five_prime_UTR    |
| AT1G79530 | GLYCERALDEHYDE-3-PHOSPHATE DEH      | Encodes one of 1_29919626    | 3.61 | promoter          |
| AT4G03190 | GRR1-LIKE PROTEIN 1 (GRH1)          | Encodes an F b 4_1407272     | 3.61 | promoter          |
| AT3G61590 | HAWAIIAN SKIRT (HWS)                | HAWAIIAN SKII 3_22794416     | 3.61 | downstream        |
| AT3G61890 | HOMEBOX 12 (HB-12)                  | Encodes a hom 3_22915460     | 3.61 | promoter          |
| AT2G46680 | HOMEBOX 7 (HB-7)                    | encodes a putat 2_19168856   | 3.61 | proximal promoter |
| AT1G06148 | na                                  | Unknown gene 1_1877777       | 3.61 | promoter          |
| AT5G19060 | na                                  | CONTAINS Inte 5_6372653      | 3.61 | promoter          |
| AT2G15170 | na                                  | Plant basic secr 2_6587443   | 3.61 | promoter          |
| AT1G49520 | na                                  | SWIB complex I 1_18328984    | 3.61 | proximal promoter |
| AT1G76460 | na                                  | RNA-binding (R 1_28689229    | 3.61 | promoter          |
| AT1G76720 | na                                  | eukaryotic trans 1_28800428  | 3.61 | promoter          |
| AT2G01330 | na                                  | nucleotide bindi 2_160966    | 3.61 | promoter          |
| AT1G22403 | na                                  | other RNA 1_7910690          | 3.61 | proximal promoter |
| AT2G43370 | na                                  | RNA-binding (R 2_18013330    | 3.61 | promoter          |
| AT3G03960 | na                                  | TCP-1/cpn60 ct 3_1024110     | 3.61 | promoter          |
| AT3G11720 | na                                  | Polyketide cycl 3_3708693    | 3.61 | intron            |
| AT3G15260 | na                                  | Protein phosph 3_5142821     | 3.61 | downstream        |
| AT3G14830 | na                                  | unknown proteir 3_4982557    | 3.61 | promoter          |
| AT5G05140 | na                                  | Transcription eli 5_1519763  | 3.61 | promoter          |
| AT5G26990 | na                                  | Drought-respon 5_9490919     | 3.61 | promoter          |
| AT4G28530 | NAC DOMAIN CONTAINING PROTEIN 74    | NAC domain co 4_14091446     | 3.61 | intron            |
| AT4G39390 | NUCLEOTIDE SUGAR TRANSPORTER-F      | Encodes a golq 4_18314909    | 3.61 | proximal promoter |
| AT4G28660 | PHOTOSYSTEM II REACTION CENTER I    | Similar to PswW 4_14149811   | 3.61 | promoter          |
| AT3G61600 | POZ/BTB CONTAININ G-PROTEIN 1 (PO   | POZ/BTB conta 3_22794416     | 3.61 | proximal promoter |
| AT5G13170 | SENESCENCE-ASSOCIATED GENE 29 (     | Encodes a merr 5_4186447     | 3.61 | intergenic        |
| AT4G25520 | SEUSS-LIKE 1 (SLK1)                 | SEUSS-like 1 (ε 4_13036568   | 3.61 | promoter          |
| AT3G15270 | SQUAMOSA PROMOTER BINDING PRO       | Encodes a merr 3_5142821     | 3.61 | proximal promoter |
| AT3G14350 | STRUBBELIG-RECEPTOR FAMILY 7 (SR    | STRUBBELIG-r 3_4789358       | 3.61 | proximal promoter |
| AT5G26980 | SYNTAXIN OF PLANTS 41 (SYP41)       | member of SYP 5_9490919      | 3.61 | promoter          |
| AT1G66150 | TRANSMEMBRANE KINASE 1 (TMK1)       | receptor-like tra 1_24634646 | 3.61 | three_prime_UTR   |
| AT5G18680 | TUBBY LIKE PROTEIN 11 (TLP11)       | Member of TLP 5_6231409      | 3.61 | proximal promoter |
| AT3G24810 | (ICK3)                              | Kip-related prot 3_9058622   | 3.6  | proximal promoter |
| AT2G28800 | ALBINO 3 (ALB3)                     | member of Chlo 2_12359371    | 3.6  | promoter          |
| AT3G18980 | EIN2 TARGETING PROTEIN1 (ETP1)      | EIN2 targeting f 3_6546250   | 3.6  | promoter          |
| AT1G08510 | FATTY ACYL-ACP THIOESTERASES B (I   | Encodes an acy 1_2694671     | 3.6  | promoter          |
| AT2G37380 | MEMBRANE-ASSOCIATED KINASE REG      | Encodes a merr 2_15688434    | 3.6  | intergenic        |
| AT2G02160 | na                                  | CCCH-type zinc 2_556242      | 3.6  | promoter          |
| AT3G45638 | na                                  | Unknown gene 3_16755620      | 3.6  | exon              |
| AT4G05018 | na                                  | unknown proteir 4_2572595    | 3.6  | intergenic        |
| AT5G63700 | na                                  | zinc ion binding: 5_25497854 | 3.6  | promoter          |
| AT3G11180 | na                                  | 2-oxoglutarate ( 3_3504039   | 3.6  | promoter          |
| AT3G62200 | na                                  | Putative endon 3_23025949    | 3.6  | promoter          |
| AT1G30680 | na                                  | toprim domain-c 1_10881464   | 3.6  | promoter          |
| AT1G64120 | na                                  | pre-tRNA; tRNA 1_23802317    | 3.6  | promoter          |
| AT1G64130 | na                                  | Polyketide cycl 1_23802317   | 3.6  | promoter          |
| AT1G79390 | na                                  | unknown proteir 1_29864381   | 3.6  | promoter          |
| AT3G18790 | na                                  | FUNCTIONS IN 3_6477595       | 3.6  | promoter          |
| AT2G45810 | na                                  | DEA(D/H)-box f 2_18859486    | 3.6  | promoter          |
| AT4G27870 | na                                  | Vacuolar iron tr: 4_13883105 | 3.6  | downstream        |
| AT4G24805 | na                                  | S-adenosyl-L-m 4_12785373    | 3.6  | exon              |
| AT4G27875 | na                                  | pre-tRNA; tRNA 4_13883105    | 3.6  | promoter          |
| AT5G48900 | na                                  | Pectin lyase-like 5_19826016 | 3.6  | intron            |
| AT5G54170 | na                                  | Polyketide cycl 5_21987152   | 3.6  | five_prime_UTR    |
| AT4G05020 | NAD(P)H DEHYDROGENASE B2 (NDB2)     | NAD(P)H dehy 4_2572595       | 3.6  | promoter          |
| AT4G00340 | RECEPTOR-LIKE PROTEIN KINASE 4 (R   | Encodes a rece 4_148733      | 3.6  | promoter          |
| AT1G79380 | RING DOMAIN LIGASE 4 (RGLG4)        | Encodes a ubiq 1_29864381    | 3.6  | intergenic        |
| AT5G42820 | (U2AF35B)                           | U2 auxiliary fact 5_17171788 | 3.59 | promoter          |
| AT4G36870 | BEL1-LIKE HOMEODOMAIN 2 (BLH2)      | Encodes a merr 4_17373064    | 3.59 | intron            |
| AT2G44480 | BETA GLUCOSIDASE 17 (BGLU17)        | beta glucosidas 2_18358821   | 3.59 | proximal promoter |
| AT4G36880 | CYSTEINE PROTEINASE1 (CP1)          | cysteine protein 4_17373064  | 3.59 | intergenic        |
| AT2G46590 | DOF AFFECTING GERMINATION 2 (DAG    | encodes a prote 2_19132492   | 3.59 | proximal promoter |
| AT3G09350 | FES1A (Fes1A)                       | Encodes one of 3_2870881     | 3.59 | promoter          |
| AT1G61800 | GLUCOSE-6-PHOSPHATE/PHOSPHATE       | glucose6-Phosφ 1_22822710    | 3.59 | proximal promoter |
| AT5G63800 | MUCILAGE-MODIFIED 2 (MUM2)          | Involved in muc 5_25531802   | 3.59 | intron            |
| AT3G56010 | na                                  | unknown proteir 3_20788634   | 3.59 | promoter          |

|           |                                      |                              |      |                   |
|-----------|--------------------------------------|------------------------------|------|-------------------|
| AT1G15600 | na                                   | unknown protein 1_5370095    | 3.59 | three_prime_UTR   |
| AT1G15610 | na                                   | unknown protein 1_5370095    | 3.59 | proximal promoter |
| AT3G06070 | na                                   | unknown protein 3_1830163    | 3.59 | intergenic        |
| AT2G07000 | na                                   | unknown protein 2_2901851    | 3.59 | downstream        |
| AT1G66345 | na                                   | Pentatricopeptic 1_24742641  | 3.59 | intergenic        |
| AT3G13940 | na                                   | DNA binding;DH 3_4602556     | 3.59 | promoter          |
| AT3G23880 | na                                   | F-box and asso 3_8623387     | 3.59 | promoter          |
| AT3G22550 | na                                   | Protein of unknc 3_7992538   | 3.59 | exon              |
| AT5G41580 | na                                   | RING/U-box suj 5_16631332    | 3.59 | proximal promoter |
| AT5G42825 | na                                   | unknown protein 5_17171788   | 3.59 | promoter          |
| AT5G51600 | PLEIADE (PLE)                        | Mutant has defe 5_20964615   | 3.59 | promoter          |
| AT2G36420 | TON1 RECRUITING MOTIF 27 (TRM27)     | unknown protein 2_15286234   | 3.59 | promoter          |
| AT3G06060 | TSC10A (TSC10A)                      | Encodes one of 3_1830163     | 3.59 | five_prime_UTR    |
| AT1G10550 | XYLOGLUCAN:XYLOGLUCOSYL TRANS        | Encodes a merr 1_3481064     | 3.59 | promoter          |
| AT5G02470 | (DPA)                                | core cell cycle c 5_545007   | 3.58 | promoter          |
| AT4G39660 | ALANINE:GLYOXYLATE AMINOTRANSFI      | alanine;glyoxyla 4_18406586  | 3.58 | promoter          |
| AT5G66200 | ARMADILLO REPEAT ONLY 2 (ARO2)       | Armadillo repea 5_26453239   | 3.58 | downstream        |
| AT2G23080 | CASEIN KINASE II, ALPHA CHAIN 3 (CKI | Protein kinase s 2_9826956   | 3.58 | promoter          |
| AT5G19180 | E1 C-TERMINAL RELATED 1 (ECR1)       | Encodes a subf 5_6452273     | 3.58 | proximal promoter |
| AT2G41070 | ENHANCED EM LEVEL (EEL)              | Transcription fa 2_17130296  | 3.58 | promoter          |
| AT1G04370 | ETHYLENE-RESPONSIVE ELEMENT BIN      | encodes a mem 1_1174371      | 3.58 | proximal promoter |
| AT5G66190 | FERRDOXIN-NADP(+)-OXIDOREDUCT.       | Encodes a leaf- 5_26453239   | 3.58 | promoter          |
| AT4G23100 | GLUTAMATE-CYSTEINE LIGASE (GSH1)     | Encodes the en 4_12102873    | 3.58 | intron            |
| AT1G51950 | INDOLE-3-ACETIC ACID INDUCIBLE 18 (  | indole-3-acetic ; 1_19305219 | 3.58 | promoter          |
| AT1G11735 | MICRORNA171B (MIR171B)               | Encodes a micr 1_3960369     | 3.58 | intergenic        |
| AT3G48201 | MICRORNA861A (MIR861A)               | Encodes a micr 3_17837985    | 3.58 | downstream        |
| AT1G71350 | na                                   | eukaryotic trans 1_26891397  | 3.58 | promoter          |
| AT3G07030 | na                                   | Alba DNA/RNA- 3_2225554      | 3.58 | promoter          |
| AT3G53370 | na                                   | S1FA-like DNA- 3_19788912    | 3.58 | promoter          |
| AT3G53380 | na                                   | Concanavalin A 3_19788912    | 3.58 | downstream        |
| AT5G11080 | na                                   | Ubiquitin-like su 5_3522442  | 3.58 | proximal promoter |
| AT1G02290 | na                                   | unknown protein 1_453064     | 3.58 | promoter          |
| AT1G12120 | na                                   | Plant protein of 1_4117918   | 3.58 | promoter          |
| AT1G28375 | na                                   | unknown protein 1_9960358    | 3.58 | proximal promoter |
| AT2G23070 | na                                   | Protein kinase s 2_9826956   | 3.58 | promoter          |
| AT1G67350 | na                                   | unknown protein 1_25233737   | 3.58 | proximal promoter |
| AT3G48200 | na                                   | unknown protein 3_17837985   | 3.58 | promoter          |
| AT4G23090 | na                                   | unknown protein 4_12102873   | 3.58 | proximal promoter |
| AT5G01910 | na                                   | unknown protein 5_357932     | 3.58 | three_prime_UTR   |
| AT5G06050 | na                                   | Putative methyl 5_1823035    | 3.58 | intron            |
| AT5G06060 | na                                   | NAD(P)-binding 5_1823035     | 3.58 | intergenic        |
| AT5G53205 | na                                   | unknown protein 5_21585457   | 3.58 | downstream        |
| AT5G03240 | POLYUBIQUITIN 3 (UBQ3)               | encodes ubiquit 5_773454     | 3.58 | intron            |
| AT5G24470 | PSEUDO-RESPONSE REGULATOR 5 (P       | Encodes a pset 5_8358836     | 3.58 | exon              |
| AT3G07040 | RESISTANCE TO P. SYRINGAE PV MAC     | Contains an N-1 3_2225554    | 3.58 | intergenic        |
| AT2G20310 | RPM1 INTERACTING PROTEIN 13 (RIN1    | Encodes RPM1 2_8764097       | 3.58 | proximal promoter |
| AT1G62180 | 5'ADENYLYLPHOSPHOSULFATE REDUC       | encodes a ader 1_22977730    | 3.57 | promoter          |
| AT1G24657 | na                                   | unknown pseud 1_8739468      | 3.57 | proximal promoter |
| AT1G58235 | na                                   | unknown protein 1_21579865   | 3.57 | three_prime_UTR   |
| AT3G49950 | na                                   | GRAS family tra 3_18518502   | 3.57 | intergenic        |
| AT1G62181 | na                                   | unknown protein 1_22977730   | 3.57 | exon              |
| AT1G21010 | na                                   | unknown protein 1_7344768    | 3.57 | proximal promoter |
| AT4G03340 | na                                   | Core-2/l-branch 4_1470258    | 3.57 | promoter          |
| AT1G16960 | na                                   | Ubiquitin domai 1_5799824    | 3.57 | promoter          |
| AT1G70185 | na                                   | other RNA 1_26429864         | 3.57 | exon              |
| AT1G70949 | na                                   | unknown protein 1_26752489   | 3.57 | exon              |
| AT1G76810 | na                                   | eukaryotic trans 1_28836584  | 3.57 | five_prime_UTR    |
| AT2G03750 | na                                   | P-loop containir 2_1149243   | 3.57 | promoter          |
| AT3G25660 | na                                   | Amidase family 3_9343620     | 3.57 | proximal promoter |
| AT3G23840 | na                                   | HXXXD-type ac 3_8611859      | 3.57 | exon              |
| AT4G32920 | na                                   | glycine-rich prot 4_15895256 | 3.57 | exon              |
| AT4G23000 | na                                   | Calcineurin-like 4_12053652  | 3.57 | proximal promoter |
| AT4G30970 | na                                   | unknown protein 4_15069121   | 3.57 | downstream        |
| AT4G36520 | na                                   | Chaperone Dna 4_17236132     | 3.57 | proximal promoter |
| AT4G36840 | na                                   | Galactose oxidz 4_17351290   | 3.57 | promoter          |
| AT5G49665 | na                                   | Zinc finger (C3H 5_20167162  | 3.57 | exon              |
| AT2G06050 | OXOPHYTODIENOATE-REDUCTASE 3 (       | Encodes a 12-o 2_2362264     | 3.57 | five_prime_UTR    |
| AT2G18660 | PLANT NATRIURETIC PEPTIDE A (PNP-    | Encodes PNP- / 2_8091855     | 3.57 | promoter          |
| AT2G16850 | PLASMA MEMBRANE INTRINSIC PROTE      | plasma membra 2_7301148      | 3.57 | promoter          |
| AT1G16470 | PROTEASOME SUBUNIT PAB1 (PAB1)       | Encodes 20S pr 1_5622720     | 3.57 | promoter          |
| AT1G16460 | RHODANESE HOMOLOGUE 2 (RDH2)         | encodes a cytoz 1_5622720    | 3.57 | promoter          |
| AT4G30960 | SOS3-INTERACTING PROTEIN 3 (SIP3)    | Encodes CBL-ir 4_15069121    | 3.57 | downstream        |
| AT2G03760 | SULPHOTRANSFERASE 12 (SOT12)         | Encodes a bras 2_1149243     | 3.57 | downstream        |
| AT1G75500 | WALLS ARE THIN 1 (WAT1)              | An Arabidopsis 1_28341702    | 3.57 | proximal promoter |
| AT2G25080 | GLUTATHIONE PEROXIDASE 1 (GPX1)      | Encodes glutat 2_10667336    | 3.56 | proximal promoter |
| AT4G01950 | GLYCEROL-3-PHOSPHATE ACYLTRANS       | Encodes a merr 4_849462      | 3.56 | proximal promoter |
| AT1G22990 | HEAVY METAL ASSOCIATED ISOPREN       | Heavy metal tra 1_8138364    | 3.56 | proximal promoter |
| AT4G14550 | INDOLE-3-ACETIC ACID INDUCIBLE 14 (  | IAA14 is a mem 4_8347874     | 3.56 | three_prime_UTR   |
| AT3G45640 | MITOGEN-ACTIVATED PROTEIN KINASE     | Encodes a mito; 3_16758904   | 3.56 | downstream        |
| AT3G10330 | na                                   | Cyclin-like famil 3_3199600  | 3.56 | promoter          |
| AT5G22730 | na                                   | F-box/RNI-like/f 5_7553621   | 3.56 | promoter          |
| AT4G11860 | na                                   | FUNCTIONS IN 4_7139550       | 3.56 | proximal promoter |
| AT5G24990 | na                                   | Protein of unknc 5_8610526   | 3.56 | promoter          |
| AT1G05950 | na                                   | unknown protein 1_1807735    | 3.56 | promoter          |
| AT1G17490 | na                                   | unknown protein 1_6008484    | 3.56 | promoter          |
| AT1G27120 | na                                   | Galactosyltrans 1_9420479    | 3.56 | proximal promoter |
| AT1G05960 | na                                   | ARM repeat sur 1_1807735     | 3.56 | intergenic        |
| AT2G40130 | na                                   | Double Clp-N m 2_16764807    | 3.56 | proximal promoter |
| AT4G14548 | na                                   | other RNA 4_8347874          | 3.56 | downstream        |
| AT4G39140 | na                                   | RING/U-box suj 4_18232096    | 3.56 | promoter          |
| AT4G34272 | na                                   | This gene encoi 4_16406398   | 3.56 | downstream        |
| AT3G25882 | NIM1-INTERACTING 2 (NIMIN-2)         | encodes a kinas 3_9472550    | 3.56 | proximal promoter |
| AT3G45650 | NITRATE EXCRETION TRANSPORTER1       | Encodes a nitra 3_16758904   | 3.56 | promoter          |
| AT5G01730 | SCAR FAMILY PROTEIN 4 (SCAR4)        | Encodes a merr 5_277724      | 3.56 | promoter          |

|           |                                    |                               |      |                   |
|-----------|------------------------------------|-------------------------------|------|-------------------|
| AT3G20630 | UBIQUITIN-SPECIFIC PROTEASE 14 (UE | Encodes a ubiq 3_7208562      | 3.56 | promoter          |
| AT5G14070 | (ROXY2)                            | Encodes glutare 5_4542774     | 3.55 | intergenic        |
| AT5G53190 | (SWEET3)                           | Nodulin MtN3 fa 5_21572356    | 3.55 | three_prime_UTR   |
| AT2G30970 | ASPARTATE AMINOTRANSFERASE 1 (A    | ASPARTATE AI 2_13178407       | 3.55 | promoter          |
| AT4G00140 | EMBRYO SAC DEVELOPMENT ARREST      | embryo sac dev 4_54293        | 3.55 | proximal promoter |
| AT3G23400 | FIBRILLIN 4 (FIB4)                 | Encodes FIBRII 3_8378352      | 3.55 | promoter          |
| AT1G72520 | LIPOXYGENASE 4 (LOX4)              | PLAT/LH2 dom 1_27309503       | 3.55 | intron            |
| AT3G55850 | LONG AFTER FAR-RED 3 (LAF3)        | Encodes a prod 3_20721583     | 3.55 | downstream        |
| AT3G55840 | na                                 | Hs1pro-1 protei 3_20721583    | 3.55 | proximal promoter |
| AT1G11230 | na                                 | Protein of unkn 1_3764824     | 3.55 | promoter          |
| AT1G56300 | na                                 | Chaperone Dna 1_21079149      | 3.55 | exon              |
| AT3G29170 | na                                 | Eukaryotic prote 3_11139133   | 3.55 | proximal promoter |
| AT4G01400 | na                                 | FUNCTIONS IN 4_577878         | 3.55 | proximal promoter |
| AT4G01410 | na                                 | Late embryoqer 4_577878       | 3.55 | promoter          |
| AT1G03740 | na                                 | Protein kinase s 1_937712     | 3.55 | intergenic        |
| AT1G23100 | na                                 | GroES-like fami 1_8193606     | 3.55 | proximal promoter |
| AT1G55840 | na                                 | Sec14p-like phc 1_20873030    | 3.55 | proximal promoter |
| AT1G61790 | na                                 | Oligosaccharyltr 1_22816513   | 3.55 | intergenic        |
| AT2G38995 | na                                 | O-acyltransfera 2_16281673    | 3.55 | promoter          |
| AT3G01300 | na                                 | Protein kinase s 3_93570      | 3.55 | five_prime_UTR    |
| AT2G27090 | na                                 | Protein of unkn 2_11572441    | 3.55 | proximal promoter |
| AT2G30960 | na                                 | unknown proteir 2_13178407    | 3.55 | promoter          |
| AT3G01310 | na                                 | Phosphoglycer 3_93570         | 3.55 | intergenic        |
| AT3G07350 | na                                 | Protein of unkn 3_2350395     | 3.55 | intergenic        |
| AT3G51130 | na                                 | unknown proteir 3_18994121    | 3.55 | promoter          |
| AT4G13040 | na                                 | Integrase-type I 4_7613333    | 3.55 | five_prime_UTR    |
| AT4G25707 | na                                 | This gene encoi 4_13096989    | 3.55 | intergenic        |
| AT4G26240 | na                                 | unknown proteir 4_13289086    | 3.55 | promoter          |
| AT4G36130 | na                                 | Ribosomal prote 4_17097482    | 3.55 | promoter          |
| AT5G53180 | POLYPYRIMIDINE TRACT-BINDING PRO   | Encodes one of 5_21572356     | 3.55 | promoter          |
| AT1G07530 | SCARECROW-LIKE 14 (SCL14)          | Encodes a merr 1_2316444      | 3.55 | five_prime_UTR    |
| AT2G27100 | SERRATE (SE)                       | Identified as a le 2_11572441 | 3.55 | promoter          |
| AT1G03750 | SWITCH 2 (SWI2)                    | switch 2 (SWI2) 1_937712      | 3.55 | promoter          |
| AT2G27400 | TRANS-ACTING SIRNA1A (TAS1A)       | Trans-acting sir 2_11722521   | 3.55 | promoter          |
| AT1G09940 | (HEMA2)                            | Encodes glutar 1_3239452      | 3.54 | five_prime_UTR    |
| AT1G32640 | (MYC2)                             | Encodes a MYC 1_11804382      | 3.54 | intergenic        |
| AT3G21160 | ALPHA-MANNOSIDASE 2 (MNS2)         | Encodes an alpi 3_7412751     | 3.54 | intergenic        |
| AT3G21150 | B-BOX DOMAIN PROTEIN 32 (BBX32)    | Encodes a prot 3_7412751      | 3.54 | exon              |
| AT3G07370 | CARBOXYL TERMINUS OF HSC70-INTEI   | Encodes AtCHII 3_2360403      | 3.54 | five_prime_UTR    |
| AT1G48110 | EVOLUTIONARILY CONSERVED C-TERI    | evolutionarily cc 1_17769703  | 3.54 | intergenic        |
| AT3G09530 | EXOCYST SUBUNIT EXO70 FAMILY PRC   | A member of E) 3_2928412      | 3.54 | downstream        |
| AT5G47040 | LON PROTEASE 2 (LON2)              | Encodes a merr 5_19092810     | 3.54 | intergenic        |
| AT3G05790 | LON PROTEASE 4 (LON4)              | Encodes a merr 3_1725445      | 3.54 | promoter          |
| AT2G22910 | N-ACETYL-L-GLUTAMATE SYNTHASE 1    | N-acetyl-l-glutar 2_9749799   | 3.54 | promoter          |
| AT3G63052 | na                                 | This gene encoi 3_23298832    | 3.54 | downstream        |
| AT2G39210 | na                                 | Major facilitator 2_16366000  | 3.54 | downstream        |
| AT1G48100 | na                                 | Pectin lyase-like 1_17769703  | 3.54 | three_prime_UTR   |
| AT5G18200 | na                                 | encodes an ade 5_6015055      | 3.54 | promoter          |
| AT2G22905 | na                                 | Expressed prote 2_9749799     | 3.54 | intergenic        |
| AT3G21140 | na                                 | Pyridoxamine 5' 3_7412751     | 3.54 | proximal promoter |
| AT1G09575 | na                                 | Protein of unkn 1_3100854     | 3.54 | intergenic        |
| AT2G40450 | na                                 | BTB/POZ doma 2_16894281       | 3.54 | proximal promoter |
| AT3G07340 | na                                 | basic helix-loop 3_2344557    | 3.54 | proximal promoter |
| AT2G32090 | na                                 | Lactoylglutathio 2_13644287   | 3.54 | promoter          |
| AT2G41890 | na                                 | curculin-like (mc 2_17477619  | 3.54 | intergenic        |
| AT3G21690 | na                                 | MATE efflux fan 3_7638646     | 3.54 | promoter          |
| AT3G62280 | na                                 | GDSL-like Lipas 3_23050066    | 3.54 | intron            |
| AT4G22790 | na                                 | MATE efflux fan 4_11976808    | 3.54 | promoter          |
| AT5G47030 | na                                 | Encodes the mi 5_19092810     | 3.54 | intergenic        |
| AT5G47510 | na                                 | Sec14p-like phc 5_19274855    | 3.54 | promoter          |
| AT1G09570 | PHYTOCHROME A (PHYA)               | Light-labile cyto 1_3100854   | 3.54 | promoter          |
| AT2G32080 | PURIN-RICH ALPHA 1 (PUR ALPHA-1)   | similar to the co 2_13644287  | 3.54 | promoter          |
| AT1G14360 | UDP-GALACTOSE TRANSPORTER 3 (U'    | UDP-galactose 1_4913267       | 3.54 | promoter          |
| AT2G20825 | ULTRAPETALA 2 (ULT2)               | ULTRAPETALA 2_8967447         | 3.54 | proximal promoter |
| AT4G18170 | WRKY DNA-BINDING PROTEIN 28 (WRK   | member of WRI 4_10063263      | 3.54 | intergenic        |
| AT5G40395 | (U6acat)                           | U6acat; snRNA 5_16166275      | 3.53 | exon              |
| AT2G31200 | ACTIN DEPOLYMERIZING FACTOR 6 (AI  | Encodes actin c 2_13293863    | 3.53 | promoter          |
| AT1G05610 | ADP-GLUCOSE PYROPHOSPHORYLASI      | Encodes the srr 1_1676292     | 3.53 | promoter          |
| AT2G45880 | BETA-AMYLASE 7 (BAM7)              | Encodes a beta 2_18878469     | 3.53 | downstream        |
| AT2G01950 | BRI1-LIKE 2 (BRL2)                 | Encodes a leuci 2_439318      | 3.53 | intergenic        |
| AT1G52827 | CADMIUM TOLERANCE 1 (CDT1)         | Cysteine-rich pr 1_19672005   | 3.53 | promoter          |
| AT1G20450 | EARLY RESPONSIVE TO DEHYDRATION    | Encodes a gene 1_7089188      | 3.53 | five_prime_UTR    |
| AT1G34550 | EMBRYO DEFECTIVE 2756 (EMB2756)    | EMBRYO DEFE 1_12651063        | 3.53 | intron            |
| AT4G13494 | MICRORNA863A (MIR863A)             | Encodes a micr 4_7847019      | 3.53 | downstream        |
| AT3G16010 | na                                 | Pentatricopeptic 3_5433948    | 3.53 | promoter          |
| AT4G14730 | na                                 | Bax inhibitor-1 f 4_8448309   | 3.53 | promoter          |
| AT3G17110 | na                                 | pseudogene, gl 3_5837288      | 3.53 | proximal promoter |
| AT5G06370 | na                                 | NC domain-con 5_1948610       | 3.53 | five_prime_UTR    |
| AT2G45870 | na                                 | Bestrophin-like j 2_18878469  | 3.53 | intergenic        |
| AT1G19020 | na                                 | unknown proteir 1_6568024     | 3.53 | promoter          |
| AT1G72270 | na                                 | CONTAINS Inte 1_27211240      | 3.53 | promoter          |
| AT1G74320 | na                                 | encodes a chol 1_27940782     | 3.53 | five_prime_UTR    |
| AT1G76520 | na                                 | Auxin efflux cari 1_28715194  | 3.53 | five_prime_UTR    |
| AT2G01220 | na                                 | Nucleotidyl tra 2_123123      | 3.53 | promoter          |
| AT2G21220 | na                                 | SAUR-like auxir 2_9088047     | 3.53 | proximal promoter |
| AT3G13120 | na                                 | Ribosomal prote 3_4221823     | 3.53 | promoter          |
| AT3G50685 | na                                 | unknown proteir 3_18834893    | 3.53 | promoter          |
| AT3G52527 | na                                 | transposable elk 3_19478106   | 3.53 | exon              |
| AT3G50690 | na                                 | Leucine-rich ref 3_18834893   | 3.53 | downstream        |
| AT4G21910 | na                                 | MATE efflux fan 4_11628834    | 3.53 | intron            |
| AT4G17900 | na                                 | PLATZ transcrip 4_9943501     | 3.53 | proximal promoter |
| AT5G19090 | na                                 | Heavy metal tra 5_6387597     | 3.53 | five_prime_UTR    |
| AT5G14830 | na                                 | transposable elk 5_4796802    | 3.53 | intron            |
| AT5G61090 | na                                 | Polynucleotidyl 5_24578211    | 3.53 | promoter          |

|           |                                      |                                |      |                   |
|-----------|--------------------------------------|--------------------------------|------|-------------------|
| AT3G04070 | NAC DOMAIN CONTAINING PROTEIN 47     | NAC domain co 3_1063975        | 3.53 | proximal promoter |
| AT5G08740 | NAD(P)H DEHYDROGENASE C1 (NDC1)      | NAD(P)H dehyd 5_2851462        | 3.53 | promoter          |
| AT1G31330 | PHOTOSYSTEM I SUBUNIT F (PSAF)       | Encodes subun 1_11216042       | 3.53 | promoter          |
| AT1G58470 | RNA-BINDING PROTEIN 1 (RBP1)         | encodes an RN 1_21724910       | 3.53 | proximal promoter |
| AT2G26570 | WEAK CHLOROPLAST MOVEMENT UN1        | Encodes a colle 2_11298151     | 3.53 | proximal promoter |
| AT3G52310 | ATP-BINDING CASSETTE G27 (ABCG27)    | ABC-2 type tran 3_19399044     | 3.52 | intron            |
| AT5G41410 | BELL 1 (BEL1)                        | Homeodomain f 5_16581788       | 3.52 | intron            |
| AT5G54590 | CALCIUM/CALMODULIN-REGULATED R       | Splice variant A 5_22179113    | 3.52 | proximal promoter |
| AT1G17455 | ELF4-LIKE 4 (ELF4-L4)                | ELF4-like 4 (ELI 1_5998681     | 3.52 | downstream        |
| AT1G30040 | GIBBERELLIN 2-OXIDASE (GA2OX2)       | Encodes a gibb 1_10537336      | 3.52 | promoter          |
| AT1G28300 | LEAFY COTYLEDON 2 (LEC2)             | Transcription fa 1_9896169     | 3.52 | intergenic        |
| AT1G12805 | na                                   | nucleotide bindi 1_4367167     | 3.52 | downstream        |
| AT1G12810 | na                                   | proline-rich fami 1_4367167    | 3.52 | promoter          |
| AT3G52302 | na                                   | This gene encod 3_19399044     | 3.52 | promoter          |
| AT2G26780 | na                                   | ARM repeat sup 2_11409832      | 3.52 | promoter          |
| AT1G15670 | na                                   | Galactose oxid 1_5388195       | 3.52 | proximal promoter |
| AT3G02100 | na                                   | UDP-Glycosyltr 3_371293        | 3.52 | proximal promoter |
| AT3G11285 | na                                   | pre-tRNA; tRNA 3_3535061       | 3.52 | promoter          |
| AT3G19000 | na                                   | 2-oxoglutarate ( 3_6556048     | 3.52 | proximal promoter |
| AT3G19002 | na                                   | Potential natura 3_6556048     | 3.52 | intergenic        |
| AT3G19010 | na                                   | 2-oxoglutarate ( 3_6556048     | 3.52 | downstream        |
| AT5G20840 | na                                   | Phosphoinositid 5_7069259      | 3.52 | promoter          |
| AT5G21535 | na                                   | transposable elk 5_7234480     | 3.52 | intergenic        |
| AT5G58950 | na                                   | Protein kinase s 5_23803813    | 3.52 | promoter          |
| AT4G21680 | NITRATE TRANSPORTER 1.8 (NRT1.8)     | Encodes a nitra 4_11520438     | 3.52 | proximal promoter |
| AT3G02110 | SERINE CARBOXYPEPTIDASE-LIKE 25      | ( serine carboxyp 3_371293     | 3.52 | intron            |
| AT1G17460 | TRF-LIKE 3 (TRFL3)                   | Arabidopsis thal 1_5998681     | 3.52 | promoter          |
| AT4G15210 | BETA-AMYLASE 5 (BAM5)                | cytosolic beta-a 4_8669602     | 3.51 | promoter          |
| AT5G01630 | BRCA2-LIKE B (BRCA2B)                | Ortholog of bree 5_241224      | 3.51 | promoter          |
| AT1G64980 | CADMIUM 2+ INDUCED (CDI)             | Encodes a puta 1_24139379      | 3.51 | promoter          |
| AT1G77630 | LYSIN-MOTIF (LYSM) DOMAIN PROTEIN    | Encodes a lysin 1_29175556     | 3.51 | downstream        |
| AT3G56220 | na                                   | transcription rec 3_20857355   | 3.51 | proximal promoter |
| AT4G01270 | na                                   | RING/U-box sup 4_535192        | 3.51 | downstream        |
| AT4G01280 | na                                   | Homeodomain-l 4_535192         | 3.51 | promoter          |
| AT5G03490 | na                                   | UDP-Glycosyltr 5_872548        | 3.51 | exon              |
| AT5G19025 | na                                   | Ribosomal prote 5_6357133      | 3.51 | promoter          |
| AT1G10120 | na                                   | basic helix-loop 1_3306283     | 3.51 | five_prime_UTR    |
| AT1G66870 | na                                   | Carbohydrate-b 1_24948703      | 3.51 | proximal promoter |
| AT1G66880 | na                                   | Protein kinase s 1_24948703    | 3.51 | intron            |
| AT3G56140 | na                                   | Protein of unknc 3_20829249    | 3.51 | promoter          |
| AT3G56130 | na                                   | biotin/lipoyl attai 3_20829249 | 3.51 | three_prime_UTR   |
| AT4G29610 | na                                   | Cytidine/deoxyc 4_14517271     | 3.51 | promoter          |
| AT5G17000 | na                                   | Zinc-binding del 5_5587289     | 3.51 | promoter          |
| AT5G17010 | na                                   | Major facilitator 5_5587289    | 3.51 | downstream        |
| AT5G21070 | na                                   | unknown proteir 5_7155999      | 3.51 | promoter          |
| AT5G25451 | na                                   | Pseudogene of 5_8860061        | 3.51 | proximal promoter |
| AT1G08380 | PHOTOSYSTEM I SUBUNIT O (PSAO)       | Encodes subun 1_2641974        | 3.51 | promoter          |
| AT2G24220 | PURINE PERMEASE 5 (PUP5)             | Member of a far 2_10300043     | 3.51 | promoter          |
| AT3G54990 | SCHLAFMUTZE (SMZ)                    | Encodes a AP2 3_20378242       | 3.51 | proximal promoter |
| AT2G46330 | ARABINOGALACTAN PROTEIN 16 (AGP)     | Encodes arabin 2_19019248      | 3.5  | five_prime_UTR    |
| AT3G48560 | CHLORSULFURON/IMIDAZOLINONE RE       | Catalyzes the fc 3_18003714    | 3.5  | promoter          |
| AT5G27320 | GA INSENSITIVE DWARF1C (GID1C)       | Encodes a gibb 5_9631421       | 3.5  | downstream        |
| AT3G53950 | na                                   | glyoxal oxidase- 3_19976237    | 3.5  | exon              |
| AT1G14518 | na                                   | Unknown gene 1_4966001         | 3.5  | intergenic        |
| AT2G46320 | na                                   | Mitochondrial st 2_19019248    | 3.5  | intergenic        |
| AT3G13410 | na                                   | unknown proteir 3_4364377      | 3.5  | promoter          |
| AT5G57790 | na                                   | unknown proteir 5_23415514     | 3.5  | proximal promoter |
| AT5G18230 | na                                   | transcription rec 5_6027224    | 3.5  | five_prime_UTR    |
| AT5G65720 | NITROGEN FIXATION S (NIFS)-LIKE 1 (N | Encodes a cyst 5_26296164      | 3.5  | promoter          |
| AT3G05690 | NUCLEAR FACTOR Y, SUBUNIT A2 (NF-    | Encodes a subu 3_1679251       | 3.5  | promoter          |
| AT5G45130 | RAB HOMOLOG 1 (RHA1)                 | small GTP bindi 5_18244273     | 3.5  | five_prime_UTR    |
| AT5G38470 | RADIATION SENSITIVE23D (RAD23D)      | Encodes a merr 5_15404524      | 3.5  | promoter          |
| AT3G52590 | UBIQUITIN EXTENSION PROTEIN 1 (UBI   | Ubiquitin extens 3_19505526    | 3.5  | promoter          |
| AT4G02590 | UNFERTILIZED EMBRYO SAC 12 (UNE1     | unfertilized emb 4_1137702     | 3.5  | three_prime_UTR   |
| AT3G56400 | WRKY DNA-BINDING PROTEIN 70 (WRK     | member of WRI 3_20910551       | 3.5  | promoter          |
| AT3G12110 | ACTIN-11 (ACT11)                     | Encodes an act 3_3860025       | 3.49 | downstream        |
| AT2G39350 | ATP-BINDING CASSETTE G1 (ABCG1)      | ABC-2 type tran 2_16432800     | 3.49 | promoter          |
| AT5G14870 | CYCLIC NUCLEOTIDE-GATED CHANNEL      | Encodes a merr 5_4811178       | 3.49 | promoter          |
| AT4G37890 | EMBRYO SAC DEVELOPMENT ARREST        | embryo sac dev 4_17815659      | 3.49 | proximal promoter |
| AT3G12120 | FATTY ACID DESATURASE 2 (FAD2)       | Major enzyme r 3_3860025       | 3.49 | intergenic        |
| AT3G01290 | HYPERSENSITIVE INDUCED REACTION      | SPFH/Band 7/P 3_87912          | 3.49 | downstream        |
| AT4G23060 | IQ-DOMAIN 22 (IQD22)                 | IQ-domain 22 (I 4_12088940     | 3.49 | intron            |
| AT4G31877 | MICRORNA156C (MIR156C)               | Encodes a micr 4_15415998      | 3.49 | promoter          |
| AT3G11440 | MYB DOMAIN PROTEIN 65 (MYB65)        | Member of the f 3_3601140      | 3.49 | proximal promoter |
| AT1G31550 | na                                   | GDSL-like Lipas 1_11297491     | 3.49 | promoter          |
| AT1G52310 | na                                   | protein kinase f: 1_19478088   | 3.49 | promoter          |
| AT1G63835 | na                                   | transposable elk 1_23688605    | 3.49 | intergenic        |
| AT1G74120 | na                                   | Mitochondrial tr: 1_27873403   | 3.49 | promoter          |
| AT3G07025 | na                                   | pre-tRNA; tRNA 3_2221856       | 3.49 | promoter          |
| AT2G39710 | na                                   | Encodes a Cyst 2_16560031      | 3.49 | intergenic        |
| AT3G26085 | na                                   | CAAX amino ter 3_9532628       | 3.49 | downstream        |
| AT3G25700 | na                                   | Eukaryotic aspa 3_9363796      | 3.49 | intergenic        |
| AT3G56590 | na                                   | hydroxyproline-i 3_20964252    | 3.49 | proximal promoter |
| AT3G57400 | na                                   | unknown proteir 3_21241460     | 3.49 | intergenic        |
| AT4G37895 | na                                   | Potential natura 4_17815659    | 3.49 | intergenic        |
| AT4G35870 | na                                   | early-responsivi 4_16992958    | 3.49 | downstream        |
| AT4G35880 | na                                   | Eukaryotic aspa 4_16992958     | 3.49 | promoter          |
| AT5G16340 | na                                   | AMP-dependen 5_5350216         | 3.49 | exon              |
| AT5G51380 | na                                   | RNI-like superfe 5_20875822    | 3.49 | promoter          |
| AT3G26090 | REGULATOR OF G-PROTEIN SIGNALIN      | Encodes AtRG 3_9532628         | 3.49 | promoter          |
| AT3G51830 | SAC DOMAIN-CONTAINING PROTEIN 8      | putative trans 3_19220016      | 3.49 | promoter          |
| AT1G78870 | UBIQUITIN-CONJUGATING ENZYME 35      | UBC35/UBC13/ 1_29650275        | 3.49 | promoter          |
| AT4G30200 | VERNALIZATIONS/VIN3-LIKE 1 (VEL1)    | Encodes a prot 4_14792450      | 3.49 | proximal promoter |
| AT3G57410 | VILLIN 3 (VLN3)                      | Encodes a prot 3_21241460      | 3.49 | intergenic        |



|           |                                    |                   |              |      |                   |
|-----------|------------------------------------|-------------------|--------------|------|-------------------|
| AT3G01280 | VOLTAGE DEPENDENT ANION CHANNEL    | Encodes a volta   | 3_87912      | 3.49 | downstream        |
| AT2G46720 | 3-KETOACYL-COA SYNTHASE 13 (KCS1)  | Encodes KCS1      | 2_19200346   | 3.48 | downstream        |
| AT3G30180 | BRASSINOSTEROID-6-OXIDASE 2 (BR6)  | Encodes a cyto    | 3_11802388   | 3.48 | intergenic        |
| AT1G29930 | CHLOROPHYLL A/B BINDING PROTEIN    | Subunit of light- | 1_10477849   | 3.48 | promoter          |
| AT5G05690 | CONSTITUTIVE PHOTOMORPHOGENIC      | Encodes a merr    | 5_1706689    | 3.48 | exon              |
| AT3G19270 | CYTOCHROME P450, FAMILY 707, SUBF  | Encodes a prote   | 3_6673600    | 3.48 | downstream        |
| AT2G18020 | EMBRYO DEFECTIVE 2296 (EMB2296)    | embryo defecti    | 2_7837016    | 3.48 | promoter          |
| AT2G42280 | FLOWERING BHLH 4 (FBH4)            | basic helix-loop  | 2_17613551   | 3.48 | promoter          |
| AT3G19260 | LAG1 HOMOLOGUE 2 (LOH2)            | LAG1 homolog      | 3_6673600    | 3.48 | proximal promoter |
| AT4G32551 | LEUNIG (LUG)                       | LEUNIG regulat    | 4_15713763   | 3.48 | downstream        |
| AT1G07900 | LOB DOMAIN-CONTAINING PROTEIN 1    | LOB domain-co     | 1_2443657    | 3.48 | downstream        |
| AT4G30410 | na                                 | sequence-speci    | 4_14873672   | 3.48 | proximal promoter |
| AT1G04425 | na                                 | other RNA         | 1_1193976    | 3.48 | promoter          |
| AT1G23040 | na                                 | hydroxyproline-i  | 1_8166549    | 3.48 | intergenic        |
| AT1G71110 | na                                 | unknown proteir   | 1_26817520   | 3.48 | proximal promoter |
| AT5G51740 | na                                 | Peptidase famil   | 5_21016705   | 3.48 | promoter          |
| AT2G42240 | na                                 | RNA-binding (R    | 2_17596740   | 3.48 | promoter          |
| AT4G23470 | na                                 | PLAC8 family pr   | 4_12249080   | 3.48 | five_prime_UTR    |
| AT5G28410 | na                                 | unknown proteir   | 5_10356784   | 3.48 | proximal promoter |
| AT1G07901 | na                                 | unknown proteir   | 1_2443657    | 3.48 | intergenic        |
| AT1G10660 | na                                 | unknown proteir   | 1_3532377    | 3.48 | promoter          |
| AT1G29500 | na                                 | SAUR-like auxir   | 1_10320966   | 3.48 | promoter          |
| AT1G62190 | na                                 | Kua-ubiquitin cc  | 1_22980386   | 3.48 | proximal promoter |
| AT2G46730 | na                                 | pseudogene, sir   | 2_19200346   | 3.48 | proximal promoter |
| AT3G03920 | na                                 | H/ACA ribonucl    | 3_1010591    | 3.48 | promoter          |
| AT1G79640 | na                                 | Protein kinase s  | 1_29972210   | 3.48 | proximal promoter |
| AT3G14172 | na                                 | FUNCTIONS IN      | 3_4705828    | 3.48 | promoter          |
| AT3G05910 | na                                 | Pectinacetyllest  | 3_1767625    | 3.48 | promoter          |
| AT4G25433 | na                                 | peptidoglycan-b   | 4_13000679   | 3.48 | intergenic        |
| AT4G32560 | na                                 | paramyosin-rela   | 4_15713763   | 3.48 | intron            |
| AT5G05550 | na                                 | sequence-speci    | 5_1640828    | 3.48 | promoter          |
| AT5G12890 | na                                 | UDP-Glycosyltr    | 5_4071288    | 3.48 | promoter          |
| AT5G12900 | na                                 | unknown proteir   | 5_4071288    | 3.48 | intergenic        |
| AT5G38400 | na                                 | unknown proteir   | 5_15377095   | 3.48 | intergenic        |
| AT5G50500 | na                                 | GDSL-like Lipas   | 5_22335858   | 3.48 | proximal promoter |
| AT4G29230 | NAC DOMAIN CONTAINING PROTEIN 7    | NAC domain co     | 4_14408958   | 3.48 | proximal promoter |
| AT1G37130 | NITRATE REDUCTASE 2 (NIA2)         | Identified as a   | n 1_14158524 | 3.48 | promoter          |
| AT1G79650 | RADIATION SENSITIVE23B (RAD23B)    | Encodes a merr    | 1_29972210   | 3.48 | three_prime_UTR   |
| AT5G38410 | RUBISCO SMALL SUBUNIT 3B (RBCS3B)  | Encodes a merr    | 5_15377095   | 3.48 | downstream        |
| AT3G07880 | SUPERCENTIPEDE1 (SCN1)             | SUPERCENTIP       | 3_2513955    | 3.48 | promoter          |
| AT4G20890 | TUBULIN BETA-9 CHAIN (TUB9)        | tubulin 9         | 4_11182062   | 3.48 | promoter          |
| AT1G51710 | UBIQUITIN-SPECIFIC PROTEASE 6 (UBF | Ubiquitin-specifi | 1_19180044   | 3.48 | promoter          |
| AT5G14060 | (CARAB-AK-LYS)                     | lysine-sensitive  | 5_4535416    | 3.47 | five_prime_UTR    |
| AT1G77180 | (SKIP)                             | Encodes a puta    | 1_29002179   | 3.47 | promoter          |
| AT4G18600 | (WAVES)                            | Encodes a merr    | 4_10247566   | 3.47 | promoter          |
| AT2G34690 | ACCELERATED CELL DEATH 11 (ACD11)  | Gene product tr   | 2_14630210   | 3.47 | promoter          |
| AT4G00730 | ANTHOCYANINLESS 2 (ANL2)           | Encodes a hom     | 4_307544     | 3.47 | intergenic        |
| AT3G10570 | CYTOCHROME P450, FAMILY 77, SUBF   | member of CYP     | 3_3301970    | 3.47 | promoter          |
| AT3G21550 | DUF679 DOMAIN MEMBRANE PROTEIN     | DUF679 domair     | 3_7593232    | 3.47 | proximal promoter |
| AT3G23400 | FIBRILLIN 4 (FIB4)                 | Encodes FIBRI     | 3_8376539    | 3.47 | three_prime_UTR   |
| AT3G28340 | GALACTURONOSYLTRANSFERASE-LIK      | Encodes a prote   | 3_10590590   | 3.47 | promoter          |
| AT1G22770 | GIGANTEA (GI)                      | Together with C   | 1_8061799    | 3.47 | promoter          |
| AT2G23770 | LYSM-CONTAINING RECEPTOR-LIKE KI   | protein kinase fr | 2_10118753   | 3.47 | intergenic        |
| AT1G49032 | na                                 | unknown proteir   | 1_18138859   | 3.47 | three_prime_UTR   |
| AT1G62780 | na                                 | unknown proteir   | 1_23251276   | 3.47 | promoter          |
| AT1G73120 | na                                 | unknown proteir   | 1_27498179   | 3.47 | promoter          |
| AT5G64780 | na                                 | Uncharacterise    | 5_25902104   | 3.47 | five_prime_UTR    |
| AT4G01340 | na                                 | CHP-rich zinc fi  | 4_556669     | 3.47 | exon              |
| AT1G49850 | na                                 | RING/U-box suj    | 1_18456620   | 3.47 | promoter          |
| AT1G63480 | na                                 | AT hook motif D   | 1_23543451   | 3.47 | proximal promoter |
| AT1G68735 | na                                 | Encodes a defe    | 1_25812180   | 3.47 | intron            |
| AT1G75295 | na                                 | Potential natura  | 1_28258662   | 3.47 | proximal promoter |
| AT1G77190 | na                                 | pre-tRNA; tRNA    | 1_29002179   | 3.47 | downstream        |
| AT1G25570 | na                                 | Di-glucose bindi  | 1_8991264    | 3.47 | intergenic        |
| AT3G09030 | na                                 | BTB/POZ doma      | 3_2754756    | 3.47 | promoter          |
| AT2G28200 | na                                 | C2H2-type zinc    | 2_12025495   | 3.47 | downstream        |
| AT3G23390 | na                                 | Zinc-binding rib  | 3_8376539    | 3.47 | downstream        |
| AT3G46370 | na                                 | Leucine-rich re   | 3_17050748   | 3.47 | proximal promoter |
| AT3G43720 | na                                 | Bifunctional inhi | 3_15616139   | 3.47 | intron            |
| AT4G02010 | na                                 | Protein kinase s  | 4_880898     | 3.47 | promoter          |
| AT4G02530 | na                                 | chloroplast thyle | 4_1114484    | 3.47 | promoter          |
| AT4G17100 | na                                 | EXPRESSED IN      | 4_9609188    | 3.47 | intergenic        |
| AT4G17098 | na                                 | Potential natura  | 4_9609188    | 3.47 | intron            |
| AT5G14050 | na                                 | Transducin/WD     | 5_4535416    | 3.47 | downstream        |
| AT4G37553 | na                                 | Potential natura  | 4_17649244   | 3.47 | promoter          |
| AT5G51340 | na                                 | Tetrapeptide      | 5_20862918   | 3.47 | promoter          |
| AT4G00740 | QUASIMODO 3 (QUA3)                 | Encodes a Golc    | 4_307544     | 3.47 | three_prime_UTR   |
| AT3G05210 | (ERCC1)                            | encodes a hom     | 3_1483950    | 3.46 | intergenic        |
| AT1G77850 | AUXIN RESPONSE FACTOR 17 (ARF17)   | Posttranscriptio  | 1_29272199   | 3.46 | promoter          |
| AT5G56870 | BETA-GALACTOSIDASE 4 (BGAL4)       | beta-galactosid   | 5_23004114   | 3.46 | promoter          |
| AT4G11050 | GLYCOSYL HYDROLASE 9C3 (GH9C3)     | glycosyl hydrola  | 4_6753041    | 3.46 | proximal promoter |
| AT3G19260 | LAG1 HOMOLOGUE 2 (LOH2)            | LAG1 homolog      | 3_6672376    | 3.46 | proximal promoter |
| AT1G27920 | MICROTUBULE-ASSOCIATED PROTEIN     | microtubule-ass   | 1_9725483    | 3.46 | proximal promoter |
| AT3G01530 | MYB DOMAIN PROTEIN 57 (MYB57)      | Member of the f   | 3_210391     | 3.46 | exon              |
| AT5G59780 | MYB DOMAIN PROTEIN 59 (MYB59)      | Encodes a puta    | 5_24085951   | 3.46 | proximal promoter |
| AT3G12700 | na                                 | Eukaryotic aspa   | 3_4035384    | 3.46 | proximal promoter |
| AT1G14710 | na                                 | hydroxyproline-i  | 1_5065131    | 3.46 | five_prime_UTR    |
| AT1G29070 | na                                 | Ribosomal prote   | 1_10149741   | 3.46 | promoter          |
| AT1G29060 | na                                 | Target SNARE      | 1_10149741   | 3.46 | downstream        |
| AT1G30320 | na                                 | Remorin family    | 1_10680027   | 3.46 | promoter          |
| AT3G01316 | na                                 | snoRNA; snoRt     | 3_105252     | 3.46 | promoter          |
| AT1G76878 | na                                 | Potential natura  | 1_28869606   | 3.46 | proximal promoter |
| AT3G13275 | na                                 | unknown proteir   | 3_4289891    | 3.46 | promoter          |
| AT3G22540 | na                                 | Protein of unkn   | 3_7986424    | 3.46 | proximal promoter |

|           |                                    |                    |                |      |                   |
|-----------|------------------------------------|--------------------|----------------|------|-------------------|
| AT3G01520 | na                                 | Adenine nucleoi    | 3_210391       | 3.46 | intergenic        |
| AT3G08610 | na                                 | unknown proteir    | 3_2616881      | 3.46 | promoter          |
| AT3G56050 | na                                 | Protein kinase f   | 3_20802774     | 3.46 | proximal promoter |
| AT3G56060 | na                                 | Glucose-methar     | 3_20802774     | 3.46 | intergenic        |
| AT3G62490 | na                                 | transposable elk   | 3_23116425     | 3.46 | proximal promoter |
| AT4G32340 | na                                 | Tetratricopeptid   | 4_15614300     | 3.46 | five_prime_UTR    |
| AT5G08190 | NUCLEAR FACTOR Y, SUBUNIT B12 (NF  | nuclear factor Y   | 5_2635888      | 3.46 | promoter          |
| AT3G55330 | PSBP-LIKE PROTEIN 1 (PPL1)         | PsbP-like protei   | 3_20515521     | 3.46 | promoter          |
| AT4G14220 | RING-H2 GROUP F1A (RHF1A)          | encodes a RINC     | 4_8195693      | 3.46 | promoter          |
| AT1G58100 | TCP DOMAIN PROTEIN 8 (TCP8)        | Encodes TCP8,      | 1_21513945     | 3.46 | five_prime_UTR    |
| AT3G53540 | TON1 RECRUITING MOTIF 19 (TRM19)   | unknown proteir    | 3_19851075     | 3.46 | promoter          |
| AT1G78690 | (At1g78690p)                       | Encodes a lysor    | 1_29596565     | 3.45 | promoter          |
| AT1G01520 | ALTERED SEED GERMINATION 4 (ASG    | Homeodomain-l      | 1_190414       | 3.45 | promoter          |
| AT5G04930 | AMINOPHOSPHOLIPID ATPASE 1 (ALA1   | Encodes a puta     | 5_1444948      | 3.45 | five_prime_UTR    |
| AT1G01510 | ANGUSTIFOLIA (AN)                  | Encodes a hom      | 1_190414       | 3.45 | intergenic        |
| AT1G19800 | ATP-BINDING CASSETTE I14 (ABC114)  | Encodes a perr     | 1_6844964      | 3.45 | proximal promoter |
| AT5G61900 | BONZAI 1 (BON1)                    | Encodes a plasi    | 5_24859340     | 3.45 | five_prime_UTR    |
| AT3G28740 | CYTOCHROME P450, FAMILY 81, SUBF   | Encodes a merr     | 3_10790744     | 3.45 | promoter          |
| AT3G03470 | CYTOCHROME P450, FAMILY 87, SUBF   | member of CYP      | 3_826633       | 3.45 | promoter          |
| AT2G45420 | LOB DOMAIN-CONTAINING PROTEIN 1E   | LOB domain-co      | 2_18717525     | 3.45 | proximal promoter |
| AT5G66850 | MITOGEN-ACTIVATED PROTEIN KINASE   | member of MEK      | 5_26700799     | 3.45 | proximal promoter |
| AT3G09480 | na                                 | Histone superfa    | 3_2915442      | 3.45 | promoter          |
| AT3G09470 | na                                 | Major facilitator  | 3_2915442      | 3.45 | proximal promoter |
| AT3G19790 | na                                 | unknown proteir    | 3_6875996      | 3.45 | promoter          |
| AT3G19800 | na                                 | Protein of unkn    | 3_6875996      | 3.45 | promoter          |
| AT3G50030 | na                                 | ARM-repeat/Tet     | 3_18546616     | 3.45 | exon              |
| AT5G18650 | na                                 | CHY-type/CTC       | 5_6216802      | 3.45 | proximal promoter |
| AT1G14580 | na                                 | C2H2-like zinc     | f_1_4987679    | 3.45 | proximal promoter |
| AT5G28300 | na                                 | Duplicated hom     | 5_10295789     | 3.45 | proximal promoter |
| AT5G14230 | na                                 | CONTAINS Inte      | 5_4589609      | 3.45 | proximal promoter |
| AT1G56233 | na                                 | Encodes a defe     | 1_21051759     | 3.45 | proximal promoter |
| AT1G69860 | na                                 | Major facilitator  | 1_26306732     | 3.45 | proximal promoter |
| AT2G37160 | na                                 | Transducin/WD      | 2_15608682     | 3.45 | promoter          |
| AT1G29160 | na                                 | Dof-type zinc      | fir_1_10182892 | 3.45 | intergenic        |
| AT2G26730 | na                                 | Leucine-rich re    | 2_11391441     | 3.45 | three_prime_UTR   |
| AT3G03460 | na                                 | unknown proteir    | 3_826633       | 3.45 | proximal promoter |
| AT3G23760 | na                                 | FUNCTIONS IN       | 3_8562703      | 3.45 | downstream        |
| AT4G19150 | na                                 | Ankyrin repeat     | f_4_10474129   | 3.45 | proximal promoter |
| AT4G34180 | na                                 | Cyclase family     | r_4_16371438   | 3.45 | promoter          |
| AT5G05830 | na                                 | RING/FYVE/PH       | 5_1755738      | 3.45 | promoter          |
| AT5G15500 | na                                 | Ankyrin repeat     | f_5_5033701    | 3.45 | promoter          |
| AT5G22608 | na                                 | unknown proteir    | 5_7512965      | 3.45 | promoter          |
| AT5G61910 | na                                 | DCD (Developn      | 5_24859340     | 3.45 | five_prime_UTR    |
| AT1G29150 | NON-ATPASE SUBUNIT 9 (ATS9)        | specifically inter | 1_10182892     | 3.45 | downstream        |
| AT1G48480 | RECEPTOR-LIKE KINASE 1 (RKL1)      | Arabidopsis thal   | 1_17917657     | 3.45 | proximal promoter |
| AT3G08710 | THIOREDOXIN H-TYPE 9 (TH9)         | Associated to pl   | 3_2645159      | 3.45 | promoter          |
| AT3G15360 | THIOREDOXIN M-TYPE 4 (TRX-M4)      | encodes a prok     | 3_5188341      | 3.45 | promoter          |
| AT2G37260 | TRANSPARENT TESTA GLABRA 2 (TTG    | Encodes a prote    | 2_15644701     | 3.45 | promoter          |
| AT2G22500 | UNCOUPLING PROTEIN 5 (UCP5)        | Encodes one of     | 2_9562951      | 3.45 | intergenic        |
| AT5G11100 | (SYTD)                             | SYTD; FUNCTI       | 5_3531450      | 3.44 | proximal promoter |
| AT5G05730 | ANTHRANILATE SYNTHASE ALPHA SUE    | ASA1 encodes       | 5_1722993      | 3.44 | promoter          |
| AT1G79110 | BOI-RELATED GENE 2 (BRG2)          | Encodes one of     | 1_29762806     | 3.44 | intergenic        |
| AT3G03220 | EXPANSIN A13 (EXPA13)              | member of Alph     | 3_744125       | 3.44 | promoter          |
| AT5G17020 | EXPORTIN 1A (XPO1A)                | Encodes a merr     | 5_5594731      | 3.44 | intron            |
| AT3G13810 | INDETERMINATE(ID)-DOMAIN 11 (IDD11 | indeterminate(IL   | 3_4544165      | 3.44 | promoter          |
| AT5G64813 | LIGHT INSENSITIVE PERIOD1 (LIP1)   | The LIP1 gene      | 5_25910180     | 3.44 | promoter          |
| AT2G21180 | na                                 | unknown proteir    | 2_9074833      | 3.44 | three_prime_UTR   |
| AT1G09690 | na                                 | Translation prot   | 1_3137635      | 3.44 | promoter          |
| AT1G14650 | na                                 | SWAP (Suppre       | 1_5027604      | 3.44 | promoter          |
| AT1G14780 | na                                 | MAC/Perforin d     | 1_5091548      | 3.44 | exon              |
| AT1G76405 | na                                 | unknown proteir    | 1_28661798     | 3.44 | promoter          |
| AT1G80950 | na                                 | Phospholipid/gh    | 1_30415242     | 3.44 | promoter          |
| AT2G33550 | na                                 | Homeodomain-l      | 2_14211525     | 3.44 | five_prime_UTR    |
| AT3G28940 | na                                 | AIG2-like (aviru   | 3_10969379     | 3.44 | five_prime_UTR    |
| AT3G12700 | na                                 | Eukaryotic aspa    | 3_4038113      | 3.44 | intron            |
| AT3G55050 | na                                 | Protein phosph     | 3_20402515     | 3.44 | intron            |
| AT3G59680 | na                                 | unknown proteir    | 3_22043968     | 3.44 | promoter          |
| AT4G22770 | na                                 | AT hook motif      | D_4_11964802   | 3.44 | intron            |
| AT4G34110 | POLY(A) BINDING PROTEIN 2 (PAB2)   | Putative poly-A    | 4_16336233     | 3.44 | promoter          |
| AT1G10470 | RESPONSE REGULATOR 4 (ARR4)        | Encodes a two-     | 1_3442560      | 3.44 | three_prime_UTR   |
| AT3G58040 | SEVEN IN ABSENTIA OF ARABIDOPSIS   | Encodes a RINC     | 3_21488497     | 3.44 | promoter          |
| AT4G34640 | SQUALENE SYNTHASE 1 (SQS1)         | Encodes squal      | 4_16542244     | 3.44 | intergenic        |
| AT4G34650 | SQUALENE SYNTHASE 2 (SQS2)         | Encodes a prote    | 4_16542244     | 3.44 | promoter          |
| AT5G08150 | SUPPRESSOR OF PHYTOCHROME B 5      | Encodes SOB5.      | 5_2625412      | 3.44 | proximal promoter |
| AT1G03110 | TRNA MODIFICATION 82 (TRM82)       | Encodes a gene     | 1_749138       | 3.44 | promoter          |
| AT1G52340 | ABA DEFICIENT 2 (ABA2)             | Encodes a cyto     | 1_19491004     | 3.43 | intron            |
| AT1G80070 | ABNORMAL SUSPENSOR 2 (SUS2)        | a genetic locus    | 1_30117730     | 3.43 | promoter          |
| AT3G60620 | CYTIDINEDIPHOSPHATE DIACYLGLYCE    | cytidinediphospi   | 3_22406318     | 3.43 | promoter          |
| AT4G12400 | HOP3 (Hop3)                        | Encodes one of     | 4_7341469      | 3.43 | promoter          |
| AT1G51760 | IAA-ALANINE RESISTANT 3 (IAR3)     | encodes a mem      | 1_19198751     | 3.43 | proximal promoter |
| AT4G30064 | LOW-MOLECULAR-WEIGHT CYSTEINE-     | Encodes a merr     | 4_14694567     | 3.43 | exon              |
| AT5G58465 | MICRORNA390B (MIR390B)             | Encodes a micr     | 5_23636367     | 3.43 | proximal promoter |
| AT1G31358 | MICRORNA404 (MIR404)               | Encodes a micr     | 1_11231219     | 3.43 | proximal promoter |
| AT3G27820 | MONODEHYDROASCORBATE REDUCT        | Encodes a pero     | 3_10315025     | 3.43 | promoter          |
| AT2G35795 | na                                 | Chaperone Dna      | 2_15043503     | 3.43 | three_prime_UTR   |
| AT5G39530 | na                                 | Protein of unkn    | 5_15827746     | 3.43 | five_prime_UTR    |
| AT2G41750 | na                                 | DTW domain-cc      | 2_17422536     | 3.43 | promoter          |
| AT1G01210 | na                                 | DNA-directed R     | 1_88773        | 3.43 | promoter          |
| AT1G49130 | na                                 | B-box type zinc    | 1_18176504     | 3.43 | promoter          |
| AT1G49140 | na                                 | Complex I subu     | 1_18176504     | 3.43 | intergenic        |
| AT1G68680 | na                                 | unknown proteir    | 1_25785327     | 3.43 | promoter          |
| AT1G75460 | na                                 | ATP-dependent      | 1_28327566     | 3.43 | promoter          |
| AT1G79710 | na                                 | Major facilitator  | 1_29994904     | 3.43 | promoter          |
| AT1G80060 | na                                 | Ubiquitin-like     | su_1_30117730  | 3.43 | promoter          |

|           |                                   |                                      |            |      |                   |
|-----------|-----------------------------------|--------------------------------------|------------|------|-------------------|
| AT3G06433 | na                                | pseudogene of i                      | 3_1959953  | 3.43 | intron            |
| AT3G45210 | na                                | Protein of unknc                     | 3_16557155 | 3.43 | downstream        |
| AT3G62570 | na                                | Tetrapeptide                         | 3_23142492 | 3.43 | five_prime_UTR    |
| AT3G62010 | na                                | unknown proteir                      | 3_22963909 | 3.43 | proximal promoter |
| AT4G12405 | na                                | pre-tRNA; tRNA                       | 4_7341469  | 3.43 | exon              |
| AT5G03140 | na                                | Concanavalin A                       | 5_737464   | 3.43 | downstream        |
| AT5G57480 | na                                | P-loop containir                     | 5_23281341 | 3.43 | promoter          |
| AT4G39580 | na                                | Galactose oxidz                      | 4_18387050 | 3.43 | promoter          |
| AT5G03130 | na                                | unknown proteir                      | 5_737464   | 3.43 | intergenic        |
| AT5G51055 | na                                | pre-tRNA; tRNA                       | 5_20756313 | 3.43 | promoter          |
| AT5G56960 | na                                | basic helix-loop                     | 5_23038021 | 3.43 | intergenic        |
| AT2G41850 | na                                | POLYGALACTURONASE ABCISSION Z ADPG2. | 2_17465004 | 3.43 | proximal promoter |
| AT2G20140 | REGULATORY PARTICLE AAA-ATPASE    | Encodes one of                       | 2_8692570  | 3.43 | promoter          |
| AT2G35800 | S-ADENOSYL METHIONINE TRANSPOR    | Encodes a pred                       | 2_15043503 | 3.43 | proximal promoter |
| AT5G01820 | SERINE/THREONINE PROTEIN KINASE   | Encodes a CBL                        | 5_315222   | 3.43 | promoter          |
| AT3G01390 | VACUOLAR MEMBRANE ATPASE 10 (V)   | Subunit G of the                     | 3_151575   | 3.43 | promoter          |
| AT5G24380 | YELLOW STRIPE LIKE 2 (YSL2)       | closest Arabidop                     | 5_8323427  | 3.43 | promoter          |
| AT2G32930 | ZINC FINGER NUCLEASE 2 (ZFN2)     | Encodes a zinc                       | 2_13969082 | 3.43 | promoter          |
| AT2G21590 | (APL4)                            | Encodes the lar                      | 2_9238266  | 3.42 | promoter          |
| AT1G31860 | (AT-IE)                           | encodes a bifun                      | 1_11436664 | 3.42 | promoter          |
| AT4G34250 | 3-KETOACYL-COA SYNTHASE 16 (KCS1) | Encodes KCS1                         | 4_16396698 | 3.42 | downstream        |
| AT4G11080 | 3XHIGH MOBILITY GROUP-BOX1 (3xHM) | Encodes a prote                      | 4_6763699  | 3.42 | promoter          |
| AT5G10860 | CBS DOMAIN CONTAINING PROTEIN 3   | Encodes a singl                      | 5_3427975  | 3.42 | intergenic        |
| AT5G45390 | CLP PROTEASE P4 (CLPP4)           | One of several                       | 5_18396250 | 3.42 | promoter          |
| AT5G36120 | COFACTOR ASSEMBLY, COMPLEX C (E   | cofactor assem                       | 5_14199228 | 3.42 | five_prime_UTR    |
| AT5G10840 | ENDOMEMBRANE PROTEIN 1 (EMP1)     | Endomembrane                         | 5_3427975  | 3.42 | promoter          |
| AT1G56600 | GALACTINOL SYNTHASE 2 (GolS2)     | GolS2 is a galac                     | 1_21206337 | 3.42 | proximal promoter |
| AT1G65040 | HOMOLOG OF YEAST HRD1 (Hrd1B)     | Encodes one of                       | 1_24163768 | 3.42 | promoter          |
| AT1G68460 | ISOPENTENYLTRANSFERASE 1 (IPT1)   | Encodes a puta                       | 1_25666864 | 3.42 | intergenic        |
| AT5G53760 | MILDEW RESISTANCE LOCUS O 11 (ML  | A member of a                        | 5_21820743 | 3.42 | proximal promoter |
| AT5G17795 | na                                | This gene encod                      | 5_5875137  | 3.42 | exon              |
| AT1G32710 | na                                | Cytochrome c o                       | 1_11832994 | 3.42 | promoter          |
| AT1G31870 | na                                | unknown proteir                      | 1_11436664 | 3.42 | promoter          |
| AT1G80130 | na                                | Tetrapeptide                         | 1_30143520 | 3.42 | proximal promoter |
| AT1G80133 | na                                | unknown proteir                      | 1_30143520 | 3.42 | downstream        |
| AT2G21580 | na                                | Ribosomal prote                      | 2_9238266  | 3.42 | intergenic        |
| AT2G22720 | na                                | SPT2 chromatin                       | 2_9657452  | 3.42 | intron            |
| AT3G01980 | na                                | NAD(P)-binding                       | 3_329011   | 3.42 | five_prime_UTR    |
| AT3G15120 | na                                | P-loop containir                     | 3_5095958  | 3.42 | promoter          |
| AT5G64270 | na                                | splicing factor,                     | 5_25706504 | 3.42 | promoter          |
| AT5G53460 | NADH-DEPENDENT GLUTAMATE SYNT     | NADH-depende                         | 5_21700280 | 3.42 | intron            |
| AT3G19840 | PRE-MRNA-PROCESSING PROTEIN 40C   | Binds the carbo                      | 3_6890831  | 3.42 | promoter          |
| AT5G37260 | REVEILLE 2 (RVE2)                 | Encodes a MYE                        | 5_14753281 | 3.42 | promoter          |
| AT3G56850 | ABA-RESPONSIVE ELEMENT BINDING F  | Encodes an AB.                       | 3_21048521 | 3.41 | promoter          |
| AT2G28470 | BETA-GALACTOSIDASE 8 (BGAL8)      | putative beta-g                      | 2_12175611 | 3.41 | proximal promoter |
| AT5G65940 | BETA-HYDROXYISOBUTYRYL-COA HYD    | hydrolyzes beta                      | 5_26380167 | 3.41 | proximal promoter |
| AT5G44800 | CHROMATIN REMODELING 4 (CHR4)     | chromatin remo                       | 5_18093597 | 3.41 | promoter          |
| AT5G12170 | CRT (CHLOROQUINE-RESISTANCE TR    | Encodes one of                       | 5_3932548  | 3.41 | intron            |
| AT3G47500 | CYCLING DOF FACTOR 3 (CDF3)       | Dof-type zinc fir                    | 3_17504077 | 3.41 | three_prime_UTR   |
| AT5G08170 | EMBRYO DEFECTIVE 1873 (EMB1873)   | EMBRYO DEFE                          | 5_2631336  | 3.41 | promoter          |
| AT4G34200 | EMBRYO SAC DEVELOPMENT ARREST     | embryo sac dev                       | 4_16376645 | 3.41 | promoter          |
| AT3G20770 | ETHYLENE-INSENSITIVE3 (EIN3)      | Encodes EIN3                         | (3_7260359 | 3.41 | downstream        |
| AT2G30470 | HIGH-LEVEL EXPRESSION OF SUGAR-I  | HSI2 is a memb                       | 2_12987307 | 3.41 | proximal promoter |
| AT1G10210 | MITOGEN-ACTIVATED PROTEIN KINASE  | Encodes ATPM                         | 1_3347838  | 3.41 | proximal promoter |
| AT2G41730 | na                                | unknown proteir                      | 2_17409598 | 3.41 | exon              |
| AT2G30480 | na                                | unknown proteir                      | 2_12987307 | 3.41 | three_prime_UTR   |
| AT1G25420 | na                                | Regulator of Vp                      | 1_8915990  | 3.41 | promoter          |
| AT4G19520 | na                                | disease resistar                     | 4_10648234 | 3.41 | proximal promoter |
| AT5G59700 | na                                | Protein kinase s                     | 5_24051484 | 3.41 | intergenic        |
| AT5G59690 | na                                | Histone superfa                      | 5_24051484 | 3.41 | promoter          |
| AT3G20760 | na                                | Nse4, compone                        | 3_7260359  | 3.41 | proximal promoter |
| AT2G28480 | na                                | RNA-binding Cf                       | 2_12175611 | 3.41 | intergenic        |
| AT2G32795 | na                                | Unknown gene                         | 2_13911777 | 3.41 | intergenic        |
| AT3G44630 | na                                | Disease resistai                     | 3_16195885 | 3.41 | promoter          |
| AT3G44620 | na                                | protein tyrosine                     | 3_16195885 | 3.41 | downstream        |
| AT3G59150 | na                                | F-box/RNI-like                       | 3_21872640 | 3.41 | promoter          |
| AT5G11000 | na                                | Plant protein of                     | 5_3480598  | 3.41 | promoter          |
| AT5G59000 | na                                | RING/FYVE/PH                         | 5_23817679 | 3.41 | proximal promoter |
| AT5G65950 | na                                | FUNCTIONS IN                         | 5_26380167 | 3.41 | five_prime_UTR    |
| AT1G03060 | SPIRRIG (SPI)                     | Encodes a WD/                        | 1_728286   | 3.41 | proximal promoter |
| AT3G15990 | SULFATE TRANSPORTER 3;4 (SULTR3;  | Encodes sulfate                      | 3_5427612  | 3.41 | intron            |
| AT2G02180 | TOBAMOVIRUS MULTIPLICATION PROT   | Necessary for t                      | 2_559871   | 3.41 | proximal promoter |
| AT3G12060 | TRICHOME BIREFRINGENCE-LIKE 1 (TE | Encodes a merr                       | 3_3842946  | 3.41 | promoter          |
| AT3G56860 | UBP1-ASSOCIATED PROTEIN 2A (UBA2  | encodes a nuck                       | 3_21048521 | 3.41 | downstream        |
| AT1G10200 | WLIM1 (WLIM1)                     | Encodes a merr                       | 1_3347838  | 3.41 | five_prime_UTR    |
| AT1G28320 | (DEG15)                           | Mutants in this                      | 1_9924479  | 3.4  | five_prime_UTR    |
| AT5G47370 | (HAT2)                            | homeobox-leuci                       | 5_19216457 | 3.4  | three_prime_UTR   |
| AT1G59590 | (ZCF37)                           | ZCF37 mRNA,                          | 1_21886945 | 3.4  | proximal promoter |
| AT2G03730 | ACT DOMAIN REPEAT 5 (ACR5)        | Member of a srr                      | 2_1137485  | 3.4  | downstream        |
| AT5G11160 | ADENINE PHOSPHORIBOSYLTRANSFER    | adenine phosph                       | 5_3552960  | 3.4  | intergenic        |
| AT4G21940 | CALCIUM-DEPENDENT PROTEIN KINASE  | member of Calc                       | 4_11640324 | 3.4  | promoter          |
| AT3G14690 | CYTOCHROME P450, FAMILY 72, SUBF  | putative cytochr                     | 3_4937160  | 3.4  | promoter          |
| AT4G33010 | GLYCINE DECARBOXYLASE P-PROTEIN   | glycine decarbo                      | 4_15931326 | 3.4  | five_prime_UTR    |
| AT5G11170 | HOMOLOG OF HUMAN UAP56 A (UAP56   | DEAD/DEAH bc                         | 5_3552960  | 3.4  | promoter          |
| AT2G37380 | MEMBRANE-ASSOCIATED KINASE REG    | Encodes a merr                       | 2_15683445 | 3.4  | intergenic        |
| AT1G19460 | na                                | Galactose oxidz                      | 1_6737952  | 3.4  | proximal promoter |
| AT1G20250 | na                                | pre-tRNA; tRNA                       | 1_7016483  | 3.4  | promoter          |
| AT3G53611 | na                                | This gene encod                      | 3_19878608 | 3.4  | exon              |
| AT1G05390 | na                                | pre-tRNA; tRNA                       | 1_1583865  | 3.4  | promoter          |
| AT1G47980 | na                                | unknown proteir                      | 1_17695621 | 3.4  | proximal promoter |
| AT2G04378 | na                                | Beta-galactosid.                     | 2_1526818  | 3.4  | five_prime_UTR    |
| AT2G04380 | na                                | unknown proteir                      | 2_1526818  | 3.4  | downstream        |
| AT2G04390 | na                                | Ribosomal S17                        | 2_1526818  | 3.4  | promoter          |
| AT1G21010 | na                                | unknown proteir                      | 1_7343975  | 3.4  | proximal promoter |

|           |                                   |                              |      |                   |
|-----------|-----------------------------------|------------------------------|------|-------------------|
| AT1G72510 | na                                | Protein of unknc 1_27301211  | 3.4  | proximal promoter |
| AT3G21330 | na                                | basic helix-loop 3_7505122   | 3.4  | proximal promoter |
| AT3G12700 | na                                | Eukaryotic aspa 3_4039223    | 3.4  | downstream        |
| AT4G01455 | na                                | pre-tRNA; tRNA 4_612260      | 3.4  | promoter          |
| AT4G16563 | na                                | Eukaryotic aspa 4_9332917    | 3.4  | proximal promoter |
| AT4G21926 | na                                | unknown proteir 4_11640324   | 3.4  | promoter          |
| AT4G21930 | na                                | Protein of unknc 4_11640324  | 3.4  | exon              |
| AT5G08200 | na                                | peptidoglycan-b 5_2637543    | 3.4  | promoter          |
| AT5G47360 | na                                | Tetratricopeptid 5_19216457  | 3.4  | proximal promoter |
| AT5G50915 | na                                | basic helix-loop 5_20713049  | 3.4  | proximal promoter |
| AT5G08190 | NUCLEAR FACTOR Y, SUBUNIT B12 (NF | nuclear factor Y 5_2637543   | 3.4  | downstream        |
| AT5G02190 | PROMOTION OF CELL SURVIVAL 1 (PC  | encodes an asp 5_434259      | 3.4  | proximal promoter |
| AT3G53610 | RAB GTPASE HOMOLOG 8 (RAB8)       | GTPase AtRAB 3_19878608      | 3.4  | promoter          |
| AT4G35800 | RNA POLYMERASE II LARGE SUBUNIT   | Encodes the un 4_16968200    | 3.4  | promoter          |
| AT3G22680 | RNA-DIRECTED DNA METHYLATION 1 (  | Encodes RNA-[ 3_8019610      | 3.4  | promoter          |
| AT1G20260 | V-ATPASE B SUBUNIT 3 (VAB3)       | One of three qe 1_7016483    | 3.4  | promoter          |
| AT4G39210 | (APL3)                            | Encodes the lar 4_18259483   | 3.39 | promoter          |
| AT3G51970 | ACYL-COA STEROL ACYL TRANSFERA    | acyl-CoA sterol 3_19284381   | 3.39 | five_prime_UTR    |
| AT3G25780 | ALLENE OXIDE CYCLASE 3 (AOC3)     | Encodes allene 3_9409049     | 3.39 | promoter          |
| AT3G22890 | ATP SULFURYLASE 1 (APS1)          | encodes ATP s1 3_8111200     | 3.39 | proximal promoter |
| AT1G32500 | ATP-BINDING CASSETTE I7 (ABC17)   | Encodes a merr 1_11749902    | 3.39 | three_prime_UTR   |
| AT3G51960 | BASIC LEUCINE ZIPPER 24 (BZIP24)  | bZIP transcriptic 3_19284381 | 3.39 | promoter          |
| AT3G57180 | BRASSINAZOLE(BRZ) INSENSITIVE PAL | BRASSINAZOL 3_21166288       | 3.39 | promoter          |
| AT4G11920 | CELL CYCLE SWITCH PROTEIN 52 A2 ( | Encodes a puta 4_7163512     | 3.39 | promoter          |
| AT5G67260 | CYCLIN D3;2 (CYCD3;2)             | Encode CYCD3 5_26838116      | 3.39 | intergenic        |
| AT5G67190 | DREB AND EAR MOTIF PROTEIN 2 (DE  | encodes a mem 5_26811231     | 3.39 | proximal promoter |
| AT1G32490 | ENHANCED SILENCING PHENOTYPE 3    | Encodes a hom 1_11749902     | 3.39 | promoter          |
| AT5G05740 | ETHYLENE-DEPENDENT GRAVITROPIS    | S2P-like putativ 5_1727209   | 3.39 | promoter          |
| AT2G44150 | HISTONE-LYSINE N-METHYLTRANSFER   | Encodes a prot 2_18258464    | 3.39 | promoter          |
| AT5G06300 | LONELY GUY 7 (LOG7)               | Putative lysine c 5_1924623  | 3.39 | intron            |
| AT1G22610 | na                                | C2 calcium/lipid 1_7993966   | 3.39 | promoter          |
| AT2G14790 | na                                | transposable elk 2_6346356   | 3.39 | proximal promoter |
| AT1G29160 | na                                | Dof-type zinc fir 1_10184446 | 3.39 | promoter          |
| AT1G63640 | na                                | P-loop nucleosir 1_23596004  | 3.39 | promoter          |
| AT2G44140 | na                                | Peptidase famili 2_18258464  | 3.39 | promoter          |
| AT3G27865 | na                                | snoRNA; snoRt 3_10328346     | 3.39 | promoter          |
| AT3G46850 | na                                | Subtilase family 3_17255429  | 3.39 | proximal promoter |
| AT3G53430 | na                                | Ribosomal prot 3_19810614    | 3.39 | promoter          |
| AT4G16162 | na                                | Leucine-rich rep 4_9161694   | 3.39 | promoter          |
| AT4G25400 | na                                | basic helix-loop 4_12979775  | 3.39 | proximal promoter |
| AT5G58787 | na                                | RING/U-box suj 5_23744843    | 3.39 | downstream        |
| AT5G67411 | na                                | GRAS family tra 5_26898143   | 3.39 | intergenic        |
| AT5G10110 | na                                | unknown proteir 5_3168356    | 3.39 | promoter          |
| AT5G36980 | na                                | BEST Arabidop: 5_14609934    | 3.39 | proximal promoter |
| AT5G58790 | na                                | FUNCTIONS IN 5_23744843      | 3.39 | promoter          |
| AT5G67265 | na                                | unknown proteir 5_26838116   | 3.39 | intergenic        |
| AT5G67410 | na                                | unknown proteir 5_26898143   | 3.39 | proximal promoter |
| AT4G28530 | NAC DOMAIN CONTAINING PROTEIN 7   | NAC domain co 4_14097405     | 3.39 | proximal promoter |
| AT1G64280 | NONEXPRESSER OF PR GENES 1 (NPF   | This gene is a k 1_23855572  | 3.39 | promoter          |
| AT1G19300 | PARVUS (PARVUS)                   | The PARVUS/G 1_6670509       | 3.39 | intergenic        |
| AT4G12800 | PHOTOSYSTEM I SUBUNIT L (PSAL)    | Encodes subun 4_7521367      | 3.39 | five_prime_UTR    |
| AT2G16850 | PLASMA MEMBRANE INTRINSIC PROTE   | plasma membra 2_7303699      | 3.39 | intergenic        |
| AT3G04240 | SECRET AGENT (SEC)                | Has O-linked N- 3_1121038    | 3.39 | promoter          |
| AT4G21790 | TOBAMOVIRUS MULTIPLICATION 1 (TO  | encodes a host 4_11569757    | 3.39 | promoter          |
| AT5G64530 | XYLEM NAC DOMAIN 1 (XND1)         | xylem NAC domr 5_25793935    | 3.39 | proximal promoter |
| AT5G67030 | ABA DEFICIENT 1 (ABA1)            | Encodes a singl 5_26757328   | 3.38 | promoter          |
| AT5G01340 | MITOCHONDRIAL SUCCINATE-FUMARA    | Mitochondrial su 5_145033    | 3.38 | promoter          |
| AT3G27920 | MYB DOMAIN PROTEIN 0 (MYB0)       | Encodes a Myb 3_10365258     | 3.38 | proximal promoter |
| AT5G26600 | na                                | Pyridoxal phosph 5_9377281   | 3.38 | promoter          |
| AT1G67300 | na                                | Major facilitator 1_25197054 | 3.38 | five_prime_UTR    |
| AT1G74088 | na                                | FUNCTIONS IN 1_27859561      | 3.38 | proximal promoter |
| AT4G01810 | na                                | Sec23/Sec24 pr 4_780478      | 3.38 | promoter          |
| AT5G66070 | na                                | RING/U-box suj 5_26421754    | 3.38 | promoter          |
| AT5G59830 | na                                | unknown proteir 5_24105032   | 3.38 | promoter          |
| AT1G76660 | na                                | FUNCTIONS IN 1_28772649      | 3.38 | proximal promoter |
| AT2G01690 | na                                | ARM repeat sur 2_313832      | 3.38 | promoter          |
| AT2G24160 | na                                | pseudogene, lei 2_10271453   | 3.38 | proximal promoter |
| AT2G24660 | na                                | transposable elk 2_10490437  | 3.38 | exon              |
| AT2G28510 | na                                | Dof-type zinc fir 2_12202044 | 3.38 | proximal promoter |
| AT1G56020 | na                                | unknown proteir 1_20953478   | 3.38 | three_prime_UTR   |
| AT1G76670 | na                                | Nucleotide-sug 1_28772649    | 3.38 | three_prime_UTR   |
| AT3G17090 | na                                | Protein phosph 3_5826726     | 3.38 | promoter          |
| AT2G38070 | na                                | Protein of unknc 2_15928556  | 3.38 | promoter          |
| AT3G61790 | na                                | Protein with RIN 3_22873854  | 3.38 | promoter          |
| AT5G01350 | na                                | unknown proteir 5_145033     | 3.38 | intergenic        |
| AT5G17900 | na                                | microfibrillar-as 5_5924533  | 3.38 | promoter          |
| AT1G21640 | NAD KINASE 2 (NADK2)              | Encodes a prot 1_7588564     | 3.38 | intron            |
| AT3G20970 | NFU DOMAIN PROTEIN 4 (NFU4)       | Encodes a prot 3_7348207     | 3.38 | five_prime_UTR    |
| AT3G25165 | RALF-LIKE 25 (RALFL25)            | Member of a div 3_9164975    | 3.38 | proximal promoter |
| AT1G10470 | RESPONSE REGULATOR 4 (ARR4)       | Encodes a two- 1_3444776     | 3.38 | proximal promoter |
| AT5G40850 | UROPHORPHYRIN METHYLASE 1 (UPM    | Encodes a urop 5_16366528    | 3.38 | five_prime_UTR    |
| AT2G06925 | (PLA2-ALPHA)                      | Encodes a secr 2_2843249     | 3.37 | five_prime_UTR    |
| AT3G54690 | (SETH3)                           | Sugar isomeras 3_20246414    | 3.37 | promoter          |
| AT4G15480 | (UGT84A1)                         | Encodes a prot 4_8851315     | 3.37 | proximal promoter |
| AT1G04220 | 3-KETOACYL-COA SYNTHASE 2 (KCS2)  | Encodes KCS2, 1_1121381      | 3.37 | intron            |
| AT5G58890 | AGAMOUS-LIKE 82 (AGL82)           | AGAMOUS-like 5_23782966      | 3.37 | intergenic        |
| AT5G60790 | ATP-BINDING CASSETTE F1 (ABC F1)  | member of GCN 5_24456082     | 3.37 | promoter          |
| AT3G44340 | CLONE EIGHTY-FOUR (CEF)           | homologous to 3_16020327     | 3.37 | promoter          |
| AT5G51070 | EARLY RESPONSIVE TO DEHYDRATION   | ATP-dependent 5_20764252     | 3.37 | promoter          |
| AT5G50950 | FUMARASE 2 (FUM2)                 | Encodes a fume 5_20728211    | 3.37 | proximal promoter |
| AT4G32890 | GATA TRANSCRIPTION FACTOR 9 (GAT  | Encodes a merr 4_15875491    | 3.37 | five_prime_UTR    |
| AT1G50900 | GRANA DEFICIENT CHLOROPLAST 1 (G  | Encodes GDC1 1_18866028      | 3.37 | promoter          |
| AT4G00950 | MATERNAL EFFECT EMBRYO ARREST     | maternal effect 4_408322     | 3.37 | proximal promoter |
| AT5G60890 | MYB DOMAIN PROTEIN 34 (MYB34)     | Myb-like transcr 5_24495702  | 3.37 | exon              |

|           |    |                                  |                 |               |                   |                   |
|-----------|----|----------------------------------|-----------------|---------------|-------------------|-------------------|
| AT4G19430 | na | unknown protei                   | 4_10600097      | 3.37          | proximal promoter |                   |
| AT1G50890 | na | ARM repeat sup                   | 1_18866028      | 3.37          | five_prime_UTR    |                   |
| AT1G77660 | na | Histone H3 K4- $\epsilon$        | 1_29187923      | 3.37          | promoter          |                   |
| AT2G40435 | na | BEST Arabidop:                   | 2_16885842      | 3.37          | proximal promoter |                   |
| AT2G43460 | na | Ribosomal L38e                   | 2_18045788      | 3.37          | downstream        |                   |
| AT3G04640 | na | glycine-rich prot                | 3_1261040       | 3.37          | three_prime_UTR   |                   |
| AT3G10970 | na | Haloacid dehalc                  | 3_3436351       | 3.37          | promoter          |                   |
| AT3G54680 | na | proteophosphoc                   | 3_20246414      | 3.37          | intergenic        |                   |
| AT5G58900 | na | Homeodomain-1                    | 5_23782966      | 3.37          | downstream        |                   |
| AT5G59790 | na | CONTAINS Inte                    | 5_24090736      | 3.37          | five_prime_UTR    |                   |
| AT5G02450 | na | Ribosomal prote                  | 5_535080        | 3.37          | intergenic        |                   |
| AT5G41670 | na | 6-phosphogluc                    | 5_16667346      | 3.37          | promoter          |                   |
| AT5G41675 | na | pre-tRNA; tRNA                   | 5_16667346      | 3.37          | downstream        |                   |
| AT4G21350 | na | PLANT U-BOX 8 (PUB8)             | Encodes a U-bc  | 4_11357512    | 3.37              | promoter          |
| AT3G18830 | na | POLYOL/MONOSACCHARIDE TRANSPC    | This gene encod | 3_6491271     | 3.37              | five_prime_UTR    |
| AT1G79670 | na | RESISTANCE TO FUSARIUM OXYSPOR   | Encodes a rece  | 1_29979307    | 3.37              | exon              |
| AT5G53970 | na | TYROSINE AMINOTRANSFERASE 7 (TA  | encodes tyrosin | 5_21909509    | 3.37              | proximal promoter |
| AT3G04630 | na | WVD2-LIKE 1 (WDL1)               | Member of a srr | 3_1261040     | 3.37              | downstream        |
| AT2G37250 | na | ADENOSINE KINASE (ADK)           | encodes adenyl  | 2_15641917    | 3.36              | five_prime_UTR    |
| AT1G79440 | na | ALDEHYDE DEHYDROGENASE 5F1 (AL   | Encodes a mito_ | 1_29887421    | 3.36              | promoter          |
| AT5G07300 | na | BONZAI 2 (BON2)                  | Encodes a copii | 5_2303241     | 3.36              | three_prime_UTR   |
| AT5G04870 | na | CALCIUM DEPENDENT PROTEIN KINAS  | A calcium-depe  | 5_1420464     | 3.36              | promoter          |
| AT4G31380 | na | FPF1-LIKE PROTEIN 1 (FLP1)       | encodes a smal  | 4_15228797    | 3.36              | proximal promoter |
| AT1G80340 | na | GIBBERELLIN 3-OXIDASE 2 (GA3OX2) | Encodes a prote | 1_30201125    | 3.36              | exon              |
| AT4G35860 | na | GTP-BINDING 2 (GB2)              | GTP-binding pr  | 4_16989297    | 3.36              | promoter          |
| AT4G01680 | na | MYB DOMAIN PROTEIN 55 (MYB55)    | Encodes a puta  | 4_718194      | 3.36              | proximal promoter |
| AT2G16720 | na | MYB DOMAIN PROTEIN 7 (MYB7)      | Encodes a merr  | 2_7258962     | 3.36              | proximal promoter |
| AT1G24330 | na | ARM repeat sup                   | 1_8631329       | 3.36          | promoter          |                   |
| AT1G66553 | na | unknown protei                   | 1_24831337      | 3.36          | downstream        |                   |
| AT3G17680 | na | Kinase interacti                 | 3_6044617       | 3.36          | promoter          |                   |
| AT3G26750 | na | CONTAINS Inte                    | 3_9842185       | 3.36          | promoter          |                   |
| AT4G12790 | na | P-loop containir                 | 4_7519512       | 3.36          | promoter          |                   |
| AT1G73900 | na | pre-tRNA; tRNA                   | 1_27789048      | 3.36          | exon              |                   |
| AT5G25600 | na | BEST Arabidop:                   | 5_8912097       | 3.36          | intergenic        |                   |
| AT1G12064 | na | unknown protei                   | 1_4078167       | 3.36          | promoter          |                   |
| AT1G15650 | na | pre-tRNA; tRNA                   | 1_5380995       | 3.36          | downstream        |                   |
| AT1G56045 | na | Ribosomal prote                  | 1_20962550      | 3.36          | promoter          |                   |
| AT1G60590 | na | Pectin lyase-like                | 1_22319494      | 3.36          | proximal promoter |                   |
| AT1G72940 | na | Toll-Interleukin-1               | 1_27442149      | 3.36          | promoter          |                   |
| AT1G26208 | na | Potential natura                 | 1_9066526       | 3.36          | downstream        |                   |
| AT1G26930 | na | Galactose oxid                   | 1_9340078       | 3.36          | proximal promoter |                   |
| AT1G30340 | na | transposable el                  | 1_10694597      | 3.36          | proximal promoter |                   |
| AT3G04760 | na | Pentatricopepti                  | 3_1305922       | 3.36          | promoter          |                   |
| AT3G10970 | na | Haloacid dehalc                  | 3_3431722       | 3.36          | intergenic        |                   |
| AT3G60286 | na | This gene encod                  | 3_22281844      | 3.36          | exon              |                   |
| AT5G04880 | na | pseudogene of                    | 5_1420464       | 3.36          | intergenic        |                   |
| AT5G07310 | na | encodes a mem                    | 5_2303241       | 3.36          | proximal promoter |                   |
| AT5G15700 | na | Nucleus encod                    | 5_5122411       | 3.36          | proximal promoter |                   |
| AT5G15710 | na | Galactose oxid                   | 5_5122411       | 3.36          | promoter          |                   |
| AT5G39320 | na | UDP-glucose 6-                   | 5_15742670      | 3.36          | promoter          |                   |
| AT5G53340 | na | Galactosyltrans                  | 5_21643731      | 3.36          | promoter          |                   |
| AT4G21680 | na | NITRATE TRANSPORTER 1.8 (NRT1.8) | Encodes a nitra | 4_11522176    | 3.36              | proximal promoter |
| AT4G30210 | na | P450 REDUCTASE 2 (ATR2)          | Encodes NADP    | 4_14795917    | 3.36              | proximal promoter |
| AT1G78540 | na | SH2 DOMAIN PROTEIN B (SHB)       | Encodes a prote | 1_29544855    | 3.36              | promoter          |
| AT1G26210 | na | SOB FIVE-LIKE 1 (SOFL1)          | AtSOFL1 acts r  | 1_9066526     | 3.36              | proximal promoter |
| AT3G51895 | na | SULFATE TRANSPORTER 3;1 (SULTR3; | Encodes a sulfa | 3_19257673    | 3.36              | proximal promoter |
| AT5G26910 | na | TON1 RECRUITING MOTIF 8 (TRM8)   | unknown protei  | 5_9470392     | 3.36              | five_prime_UTR    |
| AT5G50810 | na | TRANSLOCASE INNER MEMBRANE SU    | Encodes a smal  | 5_20676745    | 3.36              | promoter          |
| AT5G58180 | na | (ATYKT62)                        | member of YKT   | 5_23545472    | 3.35              | intron            |
| AT3G10800 | na | (BZIP28)                         | Encodes bZIP2   | 3_3379309     | 3.35              | five_prime_UTR    |
| AT5G02470 | na | (DPA)                            | core cell cycle | 5_542269      | 3.35              | downstream        |
| AT1G62380 | na | ACC OXIDASE 2 (ACO2)             | Encodes a prote | 1_23083535    | 3.35              | exon              |
| AT5G65890 | na | ACT DOMAIN REPEAT 1 (ACR1)       | Member of ACT   | 5_26358078    | 3.35              | downstream        |
| AT2G37940 | na | ARABIDOPSIS INOSITOL PHOSPHORYL  | Arabidopsis lno | 2_15875078    | 3.35              | proximal promoter |
| AT1G71800 | na | CLEAVAGE STIMULATING FACTOR 64 ( | RNA 3&#8242;-   | 1_27000097    | 3.35              | exon              |
| AT5G09463 | na | CONSERVED PEPTIDE UPSTREAM OPE   | Upstream open   | 5_2946857     | 3.35              | promoter          |
| AT5G09462 | na | CONSERVED PEPTIDE UPSTREAM OPE   | Upstream open   | 5_2946857     | 3.35              | promoter          |
| AT5G09461 | na | CONSERVED PEPTIDE UPSTREAM OPE   | Upstream open   | 5_2946857     | 3.35              | promoter          |
| AT5G16715 | na | EMBRYO DEFECTIVE 2247 (EMB2247)  | embryo defectiv | 5_5493318     | 3.35              | three_prime_UTR   |
| AT3G12080 | na | EMBRYO DEFECTIVE 2738 (emb2738)  | embryo defectiv | 3_3847702     | 3.35              | promoter          |
| AT1G10910 | na | EMBRYO DEFECTIVE 3103 (EMB3103)  | Pentatricopepti | 1_3639709     | 3.35              | promoter          |
| AT5G58190 | na | EVOLUTIONARILY CONSERVED C-TER   | evolutionarily  | cc 5_23545472 | 3.35              | proximal promoter |
| AT1G46264 | na | HEAT SHOCK TRANSCRIPTION FACTO   | Encodes SCHIZ   | 1_17222633    | 3.35              | proximal promoter |
| AT5G64610 | na | HISTONE ACETYLTRANSFERASE OF TH  | Encodes an enz  | 5_25830730    | 3.35              | promoter          |
| AT3G58030 | na | RING/U-box sup                   | 3_21484401      | 3.35          | intron            |                   |
| AT5G02460 | na | Dof-type zinc fir                | 5_542269        | 3.35          | proximal promoter |                   |
| AT1G64650 | na | Major facilitator                | 1_24026620      | 3.35          | promoter          |                   |
| AT1G74860 | na | unknown protei                   | 1_28123163      | 3.35          | promoter          |                   |
| AT1G77560 | na | pre-tRNA; tRNA                   | 1_29143167      | 3.35          | promoter          |                   |
| AT2G22180 | na | hydroxyproline- $\epsilon$       | 2_9431281       | 3.35          | intergenic        |                   |
| AT3G14710 | na | RNI-like superfe                 | 3_4943297       | 3.35          | intergenic        |                   |
| AT4G11450 | na | Protein of unkn                  | 4_6962118       | 3.35          | promoter          |                   |
| AT5G09460 | na | sequence-speci                   | 5_2946857       | 3.35          | promoter          |                   |
| AT5G16720 | na | Protein of unkn                  | 5_5493318       | 3.35          | proximal promoter |                   |
| AT4G35080 | na | high-affinity nick               | 4_16696928      | 3.35          | proximal promoter |                   |
| AT4G35985 | na | Senescence/de                    | 4_17034011      | 3.35          | promoter          |                   |
| AT5G65900 | na | DEA(D/H)-box f                   | 5_26358078      | 3.35          | promoter          |                   |
| AT2G43020 | na | POLYAMINE OXIDASE 2 (PAO2)       | Encodes a poly; | 2_17891042    | 3.35              | promoter          |
| AT5G16400 | na | THIOREDOXIN F2 (TRXF2)           | Encodes an f-ty | 5_5365401     | 3.35              | promoter          |
| AT2G18700 | na | TREHALOSE PHOSPHATASE/SYNTHAS    | Encodes an enz  | 2_8106453     | 3.35              | proximal promoter |
| AT1G26570 | na | UDP-GLUCOSE DEHYDROGENASE 1 (L   | UDP-glucose de  | 1_9182153     | 3.35              | promoter          |
| AT5G64940 | na | ABC2 HOMOLOG 13 (ATH13)          | Encodes a merr  | 5_25948807    | 3.34              | promoter          |
| AT2G27228 | na | CONSERVED PEPTIDE UPSTREAM OPE   | Upstream open   | 2_11650287    | 3.34              | promoter          |
| AT5G43430 | na | ELECTRON TRANSFER FLAVOPROTEIN   | Encodes the ele | 5_17453545    | 3.34              | promoter          |

|           |                                  |                              |      |                   |
|-----------|----------------------------------|------------------------------|------|-------------------|
| AT5G57685 | GLUTAMINE DUMPER 3 (GDU3)        | Encodes a merr 5_23365805    | 3.34 | downstream        |
| AT2G45480 | GROWTH-REGULATING FACTOR 9 (GR   | Growth regulati 2_18745166   | 3.34 | promoter          |
| AT2G27230 | LONESOME HIGHWAY (LHW)           | Encodes a nucl 2_11650287    | 3.34 | promoter          |
| AT1G13370 | na                               | Histone superfa 1_4585463    | 3.34 | intergenic        |
| AT4G24970 | na                               | Histidine kinase 4_12831131  | 3.34 | exon              |
| AT4G20310 | na                               | Peptidase M50_4_10964867     | 3.34 | intergenic        |
| AT5G12850 | na                               | CCCH-type zinc 5_4056093     | 3.34 | promoter          |
| AT2G35410 | na                               | RNA-binding (R 2_14898289    | 3.34 | promoter          |
| AT1G11125 | na                               | unknown protei 1_3719539     | 3.34 | exon              |
| AT1G48745 | na                               | unknown protei 1_18030571    | 3.34 | promoter          |
| AT2G27229 | na                               | Pentatricopepti 2_11650287   | 3.34 | intergenic        |
| AT3G10760 | na                               | Homeodomain-l 3_3371649      | 3.34 | intergenic        |
| AT3G10770 | na                               | Single-stranded 3_3371649    | 3.34 | intergenic        |
| AT3G12910 | na                               | NAC (No Apical 3_4107233     | 3.34 | proximal promoter |
| AT4G10080 | na                               | unknown proteir 4_6302695    | 3.34 | promoter          |
| AT4G13265 | na                               | pre-tRNA; tRNA 4_7731121     | 3.34 | downstream        |
| AT4G13270 | na                               | Late embryoger 4_7731121     | 3.34 | promoter          |
| AT4G14200 | na                               | Pentatricopepti 4_8188760    | 3.34 | five_prime_UTR    |
| AT4G27270 | na                               | Quinone reduct: 4_13661269   | 3.34 | downstream        |
| AT4G37180 | na                               | myb family trans 4_17506898  | 3.34 | intergenic        |
| AT4G33640 | na                               | unknown proteir 4_16160350   | 3.34 | promoter          |
| AT5G40450 | na                               | unknown proteir 5_16197233   | 3.34 | proximal promoter |
| AT4G37190 | na                               | LOCATED IN: c 4_17506898     | 3.34 | promoter          |
| AT5G47860 | na                               | Protein of unkn 5_19381364   | 3.34 | promoter          |
| AT1G69295 | PLASMODESMATA CALLOSE-BINDING I  | Encodes a merr 1_26053201    | 3.34 | proximal promoter |
| AT5G60690 | REVOLUTA (REV)                   | REVOLUTA rec 5_24397031      | 3.34 | five_prime_UTR    |
| AT5G48880 | 3-KETO-ACYL-COENZYME A THIOLEASE | Encodes a pero 5_19819091    | 3.33 | proximal promoter |
| AT3G18690 | MAP KINASE SUBSTRATE 1 (MKS1)    | Encodes a nucl 3_6430520     | 3.33 | promoter          |
| AT1G48095 | na                               | unknown proteir 1_17763722   | 3.33 | intergenic        |
| AT2G03290 | na                               | emp24/gp25L/p 2_999356       | 3.33 | promoter          |
| AT2G34620 | na                               | Mitochondrial tr: 2_14577069 | 3.33 | promoter          |
| AT3G54390 | na                               | sequence-speci 3_20140791    | 3.33 | proximal promoter |
| AT3G54400 | na                               | Eukaryotic aspa 3_20140791   | 3.33 | intron            |
| AT5G66780 | na                               | unknown proteir 5_26663253   | 3.33 | promoter          |
| AT2G07170 | na                               | ARM repeat sur 2_2974948     | 3.33 | promoter          |
| AT2G17160 | na                               | Interleukin-1 rec 2_7472434  | 3.33 | promoter          |
| AT2G02780 | na                               | Leucine-rich re 2_784836     | 3.33 | promoter          |
| AT2G11140 | na                               | transposable elk 2_4416600   | 3.33 | downstream        |
| AT1G52905 | na                               | unknown proteir 1_19705866   | 3.33 | promoter          |
| AT1G71710 | na                               | DNAse I-like su 1_26978569   | 3.33 | intron            |
| AT2G25800 | na                               | CONTAINS Inte 2_11009713     | 3.33 | exon              |
| AT3G56200 | na                               | Encodes a puta 3_20849891    | 3.33 | promoter          |
| AT5G02680 | na                               | LOCATED IN: e 5_608349       | 3.33 | downstream        |
| AT5G02690 | na                               | unknown proteir 5_608349     | 3.33 | intergenic        |
| AT5G39030 | na                               | Protein kinase s 5_15619928  | 3.33 | promoter          |
| AT5G66180 | na                               | S-adenosyl-L-m 5_26448896    | 3.33 | promoter          |
| AT2G28610 | PRESSED FLOWER (PRS)             | Encodes a hom 2_12263155     | 3.33 | exon              |
| AT3G05030 | SODIUM HYDROGEN EXCHANGER 2 (N   | Encodes a vacc 3_1396033     | 3.33 | intron            |
| AT1G04750 | VESICLE-ASSOCIATED MEMBRANE PR   | Encodes vesiclk 1_1333663    | 3.33 | promoter          |
| AT1G66140 | ZINC FINGER PROTEIN 4 (ZFP4)     | Encodes a zinc 1_24622017    | 3.33 | promoter          |
| AT1G28290 | ARABINOGLACTAN PROTEIN 31 (AGP   | Encodes an aty 1_9895265     | 3.32 | intergenic        |
| AT4G19210 | ATP-BINDING CASSETTE E2 (ABCE2)  | member of RLI : 4_10501145   | 3.32 | promoter          |
| AT5G41410 | BELL 1 (BEL1)                    | Homeodomain f 5_16578949     | 3.32 | proximal promoter |
| AT3G14680 | CYTOCHROME P450, FAMILY 72, SUBF | putative cytochr 3_4933042   | 3.32 | proximal promoter |
| AT4G38170 | FAR1-RELATED SEQUENCE 9 (FRS9)   | FAR1-related sr 4_17904297   | 3.32 | promoter          |
| AT5G49730 | FERRIC REDUCTION OXIDASE 6 (FRO6 | Encodes a plasi 5_20200487   | 3.32 | intergenic        |
| AT5G49720 | GLYCOSYL HYDROLASE 9A1 (GH9A1)   | Encodes a merr 5_20200487    | 3.32 | promoter          |
| AT4G31560 | HIGH CHLOROPHYLL FLUORESCENCE    | Encodes HCF1: 4_15295137     | 3.32 | promoter          |
| AT5G47010 | LOW-LEVEL BETA-AMYLASE 1 (LBA1)  | Required for no 5_19071821   | 3.32 | promoter          |
| AT2G43790 | MAP KINASE 6 (MPK6)              | Encodes a MAF 2_18137684     | 3.32 | proximal promoter |
| AT1G06180 | MYB DOMAIN PROTEIN 13 (MYB13)    | member of MYE 1_1890385      | 3.32 | intron            |
| AT3G58640 | na                               | Mitogen activat 3_21693922   | 3.32 | promoter          |
| AT1G11175 | na                               | other RNA 1_3745534          | 3.32 | exon              |
| AT1G20875 | na                               | unknown proteir 1_7261650    | 3.32 | exon              |
| AT3G22290 | na                               | Endoplasmic rei 3_7880568    | 3.32 | proximal promoter |
| AT4G26130 | na                               | unknown proteir 4_13239015   | 3.32 | intergenic        |
| AT1G18415 | na                               | Potential natura 1_6345752   | 3.32 | promoter          |
| AT1G18420 | na                               | Aluminium activ 1_6345752    | 3.32 | downstream        |
| AT1G18430 | na                               | pre-tRNA; tRNA 1_6345752     | 3.32 | promoter          |
| AT2G43780 | na                               | unknown proteir 2_18137684   | 3.32 | promoter          |
| AT1G14450 | na                               | NADH dehydrog 1_4946081      | 3.32 | downstream        |
| AT1G54670 | na                               | pre-tRNA; tRNA 1_20413041    | 3.32 | promoter          |
| AT2G22220 | na                               | pre-tRNA; tRNA 2_9449908     | 3.32 | promoter          |
| AT2G22230 | na                               | Thioesterase su 2_9449908    | 3.32 | promoter          |
| AT2G27480 | na                               | Calcium-binding 2_11746567   | 3.32 | promoter          |
| AT1G01320 | na                               | Tetratricopeptid 1_128457    | 3.32 | intron            |
| AT2G45023 | na                               | other RNA 2_18572204         | 3.32 | promoter          |
| AT1G68410 | na                               | Protein phosph: 1_25652954   | 3.32 | intron            |
| AT3G52460 | na                               | hydroxyproline-i 3_19445818  | 3.32 | proximal promoter |
| AT3G57340 | na                               | FUNCTIONS IN 3_21217943      | 3.32 | proximal promoter |
| AT3G57360 | na                               | unknown proteir 3_21225489   | 3.32 | promoter          |
| AT4G01960 | na                               | unknown proteir 4_853582     | 3.32 | promoter          |
| AT4G17070 | na                               | peptidyl-prolyl c 4_9598186  | 3.32 | five_prime_UTR    |
| AT4G17390 | na                               | Ribosomal prote 4_9715672    | 3.32 | promoter          |
| AT4G17410 | na                               | DWNN domain, 4_9715672       | 3.32 | promoter          |
| AT4G19200 | na                               | proline-rich fami 4_10501145 | 3.32 | intergenic        |
| AT5G16030 | na                               | unknown proteir 5_5236701    | 3.32 | proximal promoter |
| AT5G01445 | na                               | unknown proteir 5_182551     | 3.32 | five_prime_UTR    |
| AT5G24230 | na                               | Lipase class 3-r 5_8229682   | 3.32 | exon              |
| AT5G58110 | na                               | chaperone bind: 5_23515105   | 3.32 | promoter          |
| AT5G64090 | na                               | FUNCTIONS IN 5_25647915      | 3.32 | promoter          |
| AT5G67140 | na                               | F-box/RNI-like s 5_26797336  | 3.32 | proximal promoter |
| AT5G67150 | na                               | HXXXD-type ac 5_26797336     | 3.32 | promoter          |
| AT2G23150 | NATURAL RESISTANCE-ASSOCIATED N  | Encodes a merr 2_9859551     | 3.32 | proximal promoter |

|           |                                    |                   |              |      |                   |
|-----------|------------------------------------|-------------------|--------------|------|-------------------|
| AT5G60040 | NUCLEAR RNA POLYMERASE C1 (NRP1    | Encodes a subu    | 5_24173217   | 3.32 | promoter          |
| AT1G56250 | PHLOEM PROTEIN 2-B14 (PP2-B14)     | Encodes an F-b    | 1_21060682   | 3.32 | intergenic        |
| AT4G38160 | PIGMENT DEFECTIVE 191 (pde191)     | pigment defecti   | 4_17904297   | 3.32 | intron            |
| AT5G55190 | RAN GTPASE 3 (RAN3)                | A member of R/    | 5_22392143   | 3.32 | promoter          |
| AT1G11180 | SECRETORY CARRIER MEMBRANE PR      | Secretory carrie  | 1_3745534    | 3.32 | promoter          |
| AT3G16290 | EMBRYO DEFECTIVE 2083 (EMB2083)    | embryo defectiv   | 3_5525225    | 3.31 | promoter          |
| AT1G08720 | ENHANCED DISEASE RESISTANCE 1 (E   | enhanced disea    | 1_2773925    | 3.31 | promoter          |
| AT1G69410 | EUKARYOTIC ELONGATION FACTOR 5/    | Encodes eIF5A-    | 1_26089169   | 3.31 | promoter          |
| AT1G13250 | GALACTURONOSYLTRANSFERASE-LIK      | Encodes a prot    | 1_4535080    | 3.31 | intergenic        |
| AT3G45210 | na                                 | Protein of unkn   | 3_16559642   | 3.31 | proximal promoter |
| AT1G13370 | na                                 | Histone superfa   | 1_4587497    | 3.31 | intergenic        |
| AT1G65560 | na                                 | Zinc-binding del  | 1_24373797   | 3.31 | five_prime_UTR    |
| AT2G30230 | na                                 | unknown protei    | 2_12898484   | 3.31 | intergenic        |
| AT4G23930 | na                                 | Late embryoqer    | 4_12436855   | 3.31 | promoter          |
| AT5G65440 | na                                 | unknown protei    | 5_26157381   | 3.31 | intergenic        |
| AT5G08600 | na                                 | U3 ribonucleopr   | 5_2790089    | 3.31 | intron            |
| AT5G65445 | na                                 | pre-tRNA; tRNA    | 5_26157381   | 3.31 | promoter          |
| AT5G43050 | NONPHOTOCHEMICAL QUENCHING 6 (     | Chloroplast loc   | 5_17267825   | 3.31 | promoter          |
| AT5G23090 | NUCLEAR FACTOR Y, SUBUNIT B13 (NF  | nuclear factor Y  | 5_7749054    | 3.31 | promoter          |
| AT3G16140 | PHOTOSYSTEM I SUBUNIT H-1 (PSAH-1  | Encodes subun     | 3_5469547    | 3.31 | promoter          |
| AT5G08610 | PIGMENT DEFECTIVE 340 (PDE340)     | P-loop containir  | 5_2790089    | 3.31 | promoter          |
| AT2G01570 | REPRESSOR OF GA1-3 1 (RGA1)        | Member of the \   | 2_257419     | 3.31 | five_prime_UTR    |
| AT1G05680 | URIDINE DIPHOSPHATE GLYCOSYLTR/    | Encodes a UDF     | 1_1704913    | 3.31 | promoter          |
| AT2G21150 | XAP5 CIRCADIAN TIMEKEEPER (XCT)    | XAP5 family prc   | 2_9064501    | 3.31 | proximal promoter |
| AT5G05690 | CONSTITUTIVE PHOTOMORPHOGENIC      | Encodes a merr    | 5_1708491    | 3.3  | proximal promoter |
| AT1G61210 | DWD HYPERSENSITIVE TO ABA 3 (DWA/  | DWA3 encodes      | 1_22564272   | 3.3  | promoter          |
| AT1G47128 | ESPONSIVE TO DEHYDRATION 21A (RC   | cysteine protein  | 1_17291135   | 3.3  | intergenic        |
| AT1G80790 | FACTOR OF DNA METHYLATION 5 (FDM   | Belongs to a sui  | 1_30359573   | 3.3  | promoter          |
| AT5G47770 | FARNESYL DIPHOSPHATE SYNTHASE      | Encodes a prot    | 5_19347863   | 3.3  | downstream        |
| AT5G08640 | FLAVONOL SYNTHASE 1 (FLS1)         | Encodes a flavc   | 5_2803861    | 3.3  | promoter          |
| AT5G47780 | GALACTURONOSYLTRANSFERASE 4 (C     | Encodes a prot    | 5_19347863   | 3.3  | promoter          |
| AT3G13222 | GBF-INTERACTING PROTEIN 1 (GIP1)   | Encodes a prot    | 3_4254475    | 3.3  | promoter          |
| AT3G58680 | MULTIPROTEIN BRIDGING FACTOR 1B    | One of three ge   | 3_21709065   | 3.3  | downstream        |
| AT3G24640 | na                                 | lyases; BEST A    | 3_8993993    | 3.3  | intergenic        |
| AT4G36370 | na                                 | unknown protei    | 4_17187436   | 3.3  | intron            |
| AT3G04485 | na                                 | Unknown gene      | 3_1198743    | 3.3  | intron            |
| AT1G04501 | na                                 | unknown protei    | 1_1224638    | 3.3  | exon              |
| AT5G08630 | na                                 | DDT domain-co     | 5_2803861    | 3.3  | proximal promoter |
| AT1G10110 | na                                 | F-box family prc  | 1_3302454    | 3.3  | promoter          |
| AT1G18340 | na                                 | basal transcripti | 1_6311397    | 3.3  | downstream        |
| AT1G66130 | na                                 | NAD(P)-binding    | 1_24615493   | 3.3  | exon              |
| AT1G76350 | na                                 | Plant regulator   | 1_1_28639540 | 3.3  | promoter          |
| AT1G80780 | na                                 | Polynucleotidyl   | 1_30359573   | 3.3  | intron            |
| AT2G18770 | na                                 | P-loop containir  | 2_8134520    | 3.3  | promoter          |
| AT1G18335 | na                                 | Acyl-CoA N-acy    | 1_6311397    | 3.3  | promoter          |
| AT3G13223 | na                                 | pre-tRNA; tRNA    | 3_4254475    | 3.3  | promoter          |
| AT3G53190 | na                                 | Pectin lyase-like | 3_19712632   | 3.3  | proximal promoter |
| AT3G58690 | na                                 | Protein kinase s  | 3_21709065   | 3.3  | promoter          |
| AT4G33380 | na                                 | unknown protei    | 4_16071838   | 3.3  | intron            |
| AT5G59150 | RAB GTPASE HOMOLOG A2D (RABA2D     | RAB GTPase hr     | 5_23876417   | 3.3  | promoter          |
| AT5G58590 | RAN BINDING PROTEIN 1 (RANBP1)     | Encodes a Ran-    | 5_23679869   | 3.3  | downstream        |
| AT4G36380 | ROTUNDIFOLIA 3 (ROT3)              | Encodes a cytoi   | 4_17187436   | 3.3  | downstream        |
| AT2G40160 | (TBL30)                            | Encodes a merr    | 2_16779250   | 3.29 | three_prime_UTR   |
| AT3G14370 | (WAG2)                             | The WAG2 and      | 3_4800770    | 3.29 | proximal promoter |
| AT3G46090 | (ZAT7)                             | ZAT7; FUNCTIC     | 3_16927488   | 3.29 | proximal promoter |
| AT5G13160 | AVRPPHB SUSCEPTIBLE 1 (PBS1)       | Mutant is defect  | 5_4176593    | 3.29 | five_prime_UTR    |
| AT2G23760 | BEL1-LIKE HOMEODOMAIN 4 (BLH4)     | Encodes a merr    | 2_10113066   | 3.29 | intron            |
| AT5G64050 | GLUTAMATE TRNA SYNTHETASE (ERS)    | Glutamate-tRNA/   | 5_25633299   | 3.29 | promoter          |
| AT2G40170 | LATE EMBRYOGENESIS ABUNDANT 6 (    | Encodes a grou    | 2_16779250   | 3.29 | intergenic        |
| AT5G09690 | MAGNESIUM TRANSPORTER 7 (MG7)      | Transmembran      | 5_3003621    | 3.29 | promoter          |
| AT5G03552 | MICRONA822A (MIR822A)              | Encodes a micr    | 5_898063     | 3.29 | proximal promoter |
| AT1G28180 | na                                 | P-loop containir  | 1_9846108    | 3.29 | proximal promoter |
| AT1G46554 | na                                 | other RNA         | 1_17253737   | 3.29 | exon              |
| AT1G77680 | na                                 | Ribonuclease II   | 1_29196308   | 3.29 | promoter          |
| AT2G22482 | na                                 | na                | 2_9552890    | 3.29 | proximal promoter |
| AT1G03180 | na                                 | unknown protei    | 1_773318     | 3.29 | promoter          |
| AT1G03290 | na                                 | unknown protei    | 1_807288     | 3.29 | promoter          |
| AT1G33415 | na                                 | Potential natura  | 1_12123608   | 3.29 | intron            |
| AT1G33420 | na                                 | RING/FYVE/PH      | 1_12123608   | 3.29 | promoter          |
| AT1G35110 | na                                 | transposable el   | 1_12840294   | 3.29 | exon              |
| AT2G23820 | na                                 | Metal-depender    | 2_10140400   | 3.29 | promoter          |
| AT3G06680 | na                                 | Ribosomal L29e    | 3_2114902    | 3.29 | intron            |
| AT3G28690 | na                                 | Protein kinase s  | 3_10754955   | 3.29 | promoter          |
| AT4G02940 | na                                 | oxidoreductase,   | 4_1306508    | 3.29 | five_prime_UTR    |
| AT5G01650 | na                                 | Tautomerase/M     | 5_244191     | 3.29 | promoter          |
| AT5G11310 | na                                 | Pentatricopeptic  | 5_3606350    | 3.29 | promoter          |
| AT5G38155 | na                                 | pre-tRNA; tRNA    | 5_15225314   | 3.29 | promoter          |
| AT5G03555 | NUCLEOBASE CATION SYMPORTER 1 (    | Encodes PLUT      | 5_898063     | 3.29 | downstream        |
| AT1G35112 | SADHU NON-CODING RETROTRANSPC      | Member of Sadl    | 1_12840294   | 3.29 | exon              |
| AT1G32050 | SECRETORY CARRIER MEMBRANE PR      | SCAMP family r    | 1_11528413   | 3.29 | promoter          |
| AT1G66140 | ZINC FINGER PROTEIN 4 (ZFP4)       | Encodes a zinc    | 1_24624108   | 3.29 | proximal promoter |
| AT5G08530 | 51 KDA SUBUNIT OF COMPLEX I (CI51) | 51 kDa subunit    | 5_2762000    | 3.28 | promoter          |
| AT2G33310 | AUXIN-INDUCED PROTEIN 13 (IAA13)   | Auxin induced c   | 2_14116017   | 3.28 | five_prime_UTR    |
| AT4G33580 | BETA CARBONIC ANHYDRASE 5 (BCA5    | beta carbonic ai  | 4_16139141   | 3.28 | intron            |
| AT4G08920 | CRYPTOCHROME 1 (CRY1)              | Encodes CRY1,     | 4_5718637    | 3.28 | intergenic        |
| AT5G52320 | CYTOCHROME P450, FAMILY 96, SUBF   | member of CYP     | 5_21247443   | 3.28 | proximal promoter |
| AT1G03170 | FANTASTIC FOUR 2 (FAF2)            | A member of th    | 1_768045     | 3.28 | proximal promoter |
| AT4G13940 | HOMOLOGY-DEPENDENT GENE SILEN      | Encodes a S-ac    | 4_8057258    | 3.28 | downstream        |
| AT4G14750 | IQ-DOMAIN 19 (IQD19)               | IQ-domain 19 (I   | 4_8469418    | 3.28 | proximal promoter |
| AT1G69610 | na                                 | FUNCTIONS IN      | 1_26187597   | 3.28 | exon              |
| AT4G16380 | na                                 | Heavy metal tra   | 4_9254481    | 3.28 | promoter          |
| AT2G37540 | na                                 | NAD(P)-binding    | 2_15753987   | 3.28 | promoter          |
| AT5G61520 | na                                 | Major facilitator | 5_24738919   | 3.28 | downstream        |
| AT5G61510 | na                                 | GroES-like zinc   | 5_24738919   | 3.28 | exon              |

|           |                                                            |                   |              |      |                   |
|-----------|------------------------------------------------------------|-------------------|--------------|------|-------------------|
| AT1G07310 | na                                                         | Calcium-depend    | 1_2249033    | 3.28 | promoter          |
| AT1G29470 | na                                                         | S-adenosyl-L-m    | 1_10314156   | 3.28 | promoter          |
| AT1G30730 | na                                                         | FAD-binding Be    | 1_10900253   | 3.28 | proximal promoter |
| AT2G01680 | na                                                         | Ankyrin repeat    | f 2_302810   | 3.28 | intergenic        |
| AT1G30720 | na                                                         | FAD-binding Be    | 1_10900253   | 3.28 | intergenic        |
| AT2G30960 | na                                                         | unknown protei    | 2_13177544   | 3.28 | exon              |
| AT3G15900 | na                                                         | unknown protei    | 3_5377066    | 3.28 | five_prime_UTR    |
| AT3G52565 | na                                                         | pre-tRNA; tRNA    | 3_19499941   | 3.28 | proximal promoter |
| AT4G33565 | na                                                         | RING/U-box su     | 4_16139141   | 3.28 | intergenic        |
| AT4G39780 | na                                                         | encodes a mem     | 4_18457062   | 3.28 | intergenic        |
| AT5G24210 | na                                                         | alpha/beta-Hydr   | 5_8216222    | 3.28 | proximal promoter |
| AT5G08535 | na                                                         | D111G-patch c     | 5_2762000    | 3.28 | promoter          |
| AT5G46080 | na                                                         | Protein kinase s  | 5_18690557   | 3.28 | exon              |
| AT5G57300 | na                                                         | S-adenosyl-L-m    | 5_23211230   | 3.28 | promoter          |
| AT5G57310 | na                                                         | unknown protei    | 5_23211230   | 3.28 | intron            |
| AT5G64880 | na                                                         | unknown protei    | 5_25932288   | 3.28 | promoter          |
| AT4G13950 | RALF-LIKE 31 (RALFL31)                                     | Member of a div   | 4_8057258    | 3.28 | intergenic        |
| AT3G09270 | GLUTATHIONE S-TRANSFERASE TAU 8                            | Encodes glutatr   | 3_2850177    | 3.27 | proximal promoter |
| AT5G12930 | na                                                         | unknown protei    | 5_4086013    | 3.27 | proximal promoter |
| AT4G39600 | na                                                         | Galactose oxide   | 4_18390673   | 3.27 | promoter          |
| AT1G02080 | na                                                         | transcription re  | 1_373441     | 3.27 | intron            |
| AT1G79529 | na                                                         | Potential natura  | 1_29915470   | 3.27 | promoter          |
| AT1G19835 | na                                                         | Plant protein of  | 1_6865815    | 3.27 | intergenic        |
| AT1G79520 | na                                                         | Cation efflux far | 1_29915470   | 3.27 | proximal promoter |
| AT3G01513 | na                                                         | unknown protei    | 3_204394     | 3.27 | proximal promoter |
| AT3G61028 | na                                                         | Putative endon    | 3_22582664   | 3.27 | intron            |
| AT4G23740 | na                                                         | Leucine-rich re   | 4_12369523   | 3.27 | downstream        |
| AT5G14230 | na                                                         | CONTAINS Inte     | 5_4591686    | 3.27 | promoter          |
| AT5G12010 | na                                                         | unknown protei    | 5_3880829    | 3.27 | proximal promoter |
| AT4G19170 | NINE-CIS-EPOXYCAROTENOID DIOXYG                            | chloroplast-targ  | 4_10481781   | 3.27 | promoter          |
| AT2G40380 | PRENYLATED RAB REDUCTOR 1.B2 (PF prenylated RAB 2_16865427 |                   |              | 3.27 | five_prime_UTR    |
| AT2G21790 | RIBONUCLEOTIDE REDUCTASE 1 (RNR                            | encodes large s   | 2_9293174    | 3.27 | promoter          |
| AT4G33210 | SLOW MOTION (SLOMO)                                        | Encodes SLOM      | 4_16021249   | 3.27 | promoter          |
| AT4G32660 | (AME3)                                                     | Encodes protei    | 4_15756016   | 3.26 | promoter          |
| AT5G65050 | AGAMOUS-LIKE 31 (AGL31)                                    | Originally publi  | 5_25982161   | 3.26 | promoter          |
| AT5G18120 | APR-LIKE 7 (APRL7)                                         | Encodes a prote   | 5_5990871    | 3.26 | promoter          |
| AT5G17290 | AUTOPHAGY 5 (APG5)                                         | Autophagy prot    | 5_5689917    | 3.26 | promoter          |
| AT3G49670 | BARELY ANY MERISTEM 2 (BAM2)                               | Encodes a CLA     | 3_18417153   | 3.26 | promoter          |
| AT1G69370 | CHORISMATE MUTASE 3 (CM3)                                  | Encodes choris    | 1_26080003   | 3.26 | five_prime_UTR    |
| AT3G61130 | GALACTURONOSYLTRANSFERASE 1 (C                             | Encodes a prote   | 3_22621982   | 3.26 | five_prime_UTR    |
| AT1G06520 | GLYCEROL-3-PHOSPHATE ACYLTRANS                             | Encodes a mem     | 1_1998420    | 3.26 | proximal promoter |
| AT1G05550 | na                                                         | Protein of unkn   | 1_1642979    | 3.26 | intron            |
| AT1G65820 | na                                                         | microsomal glut   | 1_24484994   | 3.26 | promoter          |
| AT2G37440 | na                                                         | DNase I-like su   | 2_15721819   | 3.26 | exon              |
| AT2G37450 | na                                                         | nodulin MIN21-1   | 2_15721819   | 3.26 | intergenic        |
| AT3G62580 | na                                                         | Late embryoger    | 3_23145579   | 3.26 | proximal promoter |
| AT4G22320 | na                                                         | unknown protei    | 4_11794911   | 3.26 | promoter          |
| AT4G29440 | na                                                         | Regulator of Vp   | 4_14477893   | 3.26 | intron            |
| AT5G62910 | na                                                         | RING/U-box su     | 5_25250525   | 3.26 | intron            |
| AT1G61330 | na                                                         | FBD, F-box and    | 1_22625699   | 3.26 | intergenic        |
| AT1G70350 | na                                                         | unknown protei    | 1_26508423   | 3.26 | promoter          |
| AT1G70810 | na                                                         | Calcium-depend    | 1_26704029   | 3.26 | promoter          |
| AT2G20060 | na                                                         | Ribosomal prote   | 2_8658903    | 3.26 | promoter          |
| AT3G50520 | na                                                         | Phosphoglycer     | 3_18750154   | 3.26 | intergenic        |
| AT3G56050 | na                                                         | Protein kinase f  | 3_20797753   | 3.26 | downstream        |
| AT4G05060 | na                                                         | PapD-like super   | 4_2592135    | 3.26 | five_prime_UTR    |
| AT5G22390 | na                                                         | Protein of unkn   | 5_7416323    | 3.26 | intergenic        |
| AT5G02870 | na                                                         | Ribosomal prote   | 5_657692     | 3.26 | promoter          |
| AT5G18110 | NOVEL CAP-BINDING PROTEIN (NCBP)                           | novel cap-bindir  | 5_5990871    | 3.26 | promoter          |
| AT2G28930 | PROTEIN KINASE 1B (PK1B)                                   | protein kinase    | 1_2_12421485 | 3.26 | proximal promoter |
| AT5G17300 | REVEILLE 1 (RVE1)                                          | Myb-like transcr  | 5_5693474    | 3.26 | proximal promoter |
| AT5G17300 | REVEILLE 1 (RVE1)                                          | Myb-like transcr  | 5_5689917    | 3.26 | intergenic        |
| AT3G57920 | SQUAMOSA PROMOTER BINDING PRO                              | Encodes a puta    | 3_21446072   | 3.26 | promoter          |
| AT3G56040 | UDP-GLUCOSE PYROPHOSPHORYLAS                               | UDP-glucose p     | 3_20797753   | 3.26 | promoter          |
| AT4G29140 | ACTIVATED DISEASE SUSCEPTIBILITY                           | Encodes Activa    | 4_14366052   | 3.25 | proximal promoter |
| AT1G19220 | AUXIN RESPONSE FACTOR 19 (ARF19)                           | Encodes an aux    | 1_6633127    | 3.25 | promoter          |
| AT3G14010 | CTC-INTERACTING DOMAIN 4 (CID4)                            | hydroxyproline-1  | 3_4636254    | 3.25 | promoter          |
| AT2G47220 | DOMAIN OF UNKNOWN FUNCTION 724                             | Member of the r   | 2_19383371   | 3.25 | promoter          |
| AT1G18840 | IQ-DOMAIN 30 (IQD30)                                       | IQ-domain 30 (I   | 1_6504320    | 3.25 | five_prime_UTR    |
| AT4G29840 | METHIONINE OVER-ACCUMULATOR 2 (                            | threonine synth   | 4_14601128   | 3.25 | promoter          |
| AT5G57910 | na                                                         | unknown protei    | 5_23451073   | 3.25 | downstream        |
| AT3G59923 | na                                                         | pre-tRNA; tRNA    | 3_22138920   | 3.25 | downstream        |
| AT3G59926 | na                                                         | pre-tRNA; tRNA    | 3_22138920   | 3.25 | promoter          |
| AT3G59930 | na                                                         | Encodes a defe    | 3_22138920   | 3.25 | intergenic        |
| AT5G64450 | na                                                         | BEST Arabidop     | 5_25771841   | 3.25 | promoter          |
| AT5G03668 | na                                                         | Potential natura  | 5_946357     | 3.25 | intergenic        |
| AT1G12330 | na                                                         | unknown protei    | 1_4196239    | 3.25 | intron            |
| AT2G36220 | na                                                         | unknown protei    | 2_15191148   | 3.25 | proximal promoter |
| AT3G59020 | na                                                         | ARM repeat su     | 3_21818269   | 3.25 | proximal promoter |
| AT4G15975 | na                                                         | RING/U-box su     | 4_9052141    | 3.25 | promoter          |
| AT4G24050 | na                                                         | NAD(P)-binding    | 4_12495203   | 3.25 | proximal promoter |
| AT4G32760 | na                                                         | ENTH/VHS/GA       | 4_15804663   | 3.25 | intergenic        |
| AT4G32765 | na                                                         | pre-tRNA; tRNA    | 4_15804663   | 3.25 | downstream        |
| AT4G36510 | na                                                         | unknown protei    | 4_17228973   | 3.25 | intron            |
| AT5G61490 | na                                                         | Uncharacterise    | 5_24732489   | 3.25 | promoter          |
| AT4G25130 | PEPTIDE MET SULFOXIDE REDUCTASE                            | Encodes a chl     | 4_12900057   | 3.25 | five_prime_UTR    |
| AT3G26570 | PHOSPHATE TRANSPORTER 2;1 (PHT2                            | low affinity phos | 3_9756175    | 3.25 | promoter          |
| AT2G01660 | PLASMODESMATA-LOCATED PROTEIN                              | Encodes a plasi   | 2_291887     | 3.25 | exon              |
| AT5G57900 | SKP1 INTERACTING PARTNER 1 (SKIP1                          | F-box protein, ir | 5_23451073   | 3.25 | promoter          |
| AT5G03670 | TON1 RECRUITING MOTIF 28 (TRM28)                           | unknown protei    | 5_946357     | 3.25 | proximal promoter |
| AT2G45660 | AGAMOUS-LIKE 20 (AGL20)                                    | Controls floweri  | 2_18811177   | 3.24 | promoter          |
| AT2G32480 | ARABIDOPSIS SERIN PROTEASE (ARAS                           | Metalloprotease   | 2_13790164   | 3.24 | promoter          |
| AT3G23210 | BASIC HELIX-LOOP-HELIX 34 (bHLH34)                         | basic Helix-Lo    | 3_8285280    | 3.24 | promoter          |
| AT2G18160 | BASIC LEUCINE-ZIPPER 2 (bZIP2)                             | Encodes a b-ZI    | 2_7899268    | 3.24 | promoter          |



|           |                                     |                                |      |                   |
|-----------|-------------------------------------|--------------------------------|------|-------------------|
| AT4G18700 | CBL-INTERACTING PROTEIN KINASE 12   | Encodes CBL-ir 4_10293443      | 3.24 | proximal promoter |
| AT2G18162 | CONSERVED PEPTIDE UPSTREAM OPE      | Upstream open 2_7899268        | 3.24 | promoter          |
| AT3G26200 | CYTOCHROME P450, FAMILY 71, SUBF    | putative cytochr 3_9589177     | 3.24 | promoter          |
| AT3G14650 | CYTOCHROME P450, FAMILY 72, SUBF    | putative cytochr 3_4922021     | 3.24 | promoter          |
| AT5G66460 | ENDO-BETA-MANNASE 7 (MAN7)          | Encodes a endc 5_26538238      | 3.24 | downstream        |
| AT2G47600 | MAGNESIUM/PROTON EXCHANGER (M       | Encodes a mag 2_19527477       | 3.24 | promoter          |
| AT1G79720 | na                                  | Eukaryotic aspa 1_29999096     | 3.24 | promoter          |
| AT5G44590 | na                                  | S-adenosyl-L-m 5_17987245      | 3.24 | promoter          |
| AT1G05020 | na                                  | ENTH/ANTH/Vt 1_1437566         | 3.24 | five_prime_UTR    |
| AT4G36470 | na                                  | S-adenosyl-L-m 4_17217379      | 3.24 | proximal promoter |
| AT5G02610 | na                                  | Ribosomal L29 5_587487         | 3.24 | promoter          |
| AT1G03270 | na                                  | CBS domain-co 1_799064         | 3.24 | promoter          |
| AT1G33475 | na                                  | SNARE-like sup 1_12148358      | 3.24 | promoter          |
| AT1G35220 | na                                  | unknown proteir 1_12908784     | 3.24 | promoter          |
| AT2G31730 | na                                  | basic helix-loop 2_13490110    | 3.24 | promoter          |
| AT2G31740 | na                                  | S-adenosyl-L-m 2_13490110      | 3.24 | intergenic        |
| AT3G04850 | na                                  | Tesmin/TSO1-li 3_1336064       | 3.24 | promoter          |
| AT3G16510 | na                                  | Calcium-depen 3_5618575        | 3.24 | promoter          |
| AT2G41810 | na                                  | FUNCTIONS IN 2_17443848        | 3.24 | proximal promoter |
| AT3G52765 | na                                  | pre-tRNA; tRNA 3_19554887      | 3.24 | promoter          |
| AT4G38760 | na                                  | Protein of unkn 4_18096302     | 3.24 | promoter          |
| AT4G22620 | na                                  | SAUR-like auxir 4_11907967     | 3.24 | exon              |
| AT4G22990 | na                                  | Major Facilitator 4_12051854   | 3.24 | promoter          |
| AT4G30750 | na                                  | unknown proteir 4_14982469     | 3.24 | promoter          |
| AT4G30760 | na                                  | Putative endon 4_14982469      | 3.24 | promoter          |
| AT5G54145 | na                                  | unknown proteir 5_21971208     | 3.24 | proximal promoter |
| AT5G59010 | na                                  | Protein kinase 5_23824661      | 3.24 | proximal promoter |
| AT5G01030 | na                                  | Protein of unkn 5_9798         | 3.24 | promoter          |
| AT5G25520 | na                                  | SPOC domain / 5_8884984        | 3.24 | promoter          |
| AT5G37750 | na                                  | Chaperone Dna 5_14994349       | 3.24 | proximal promoter |
| AT5G47170 | na                                  | unknown proteir 5_19159194     | 3.24 | promoter          |
| AT5G60980 | na                                  | Nuclear transp 5_24543340      | 3.24 | promoter          |
| AT5G66455 | na                                  | pseudogene of 5_26538238       | 3.24 | promoter          |
| AT2G27350 | OTUBAIN-LIKE DEUBIQUITINASE 1 (OTL  | Encodes an otu 2_11704317      | 3.24 | promoter          |
| AT4G38770 | PROLINE-RICH PROTEIN 4 (PRP4)       | Encodes one of 4_18096302      | 3.24 | intergenic        |
| AT3G16520 | UDP-GLUCOSYL TRANSFERASE 88A1 (     | UDP-glucosyl tr 3_5618575      | 3.24 | three_prime_UTR   |
| AT4G30290 | XYLOGLUCAN ENDOTRANSGLUCOSYL        | Encodes a xylo 4_14830303      | 3.24 | promoter          |
| AT1G01720 | (ATAF1)                             | Belongs to a lar 1_266367      | 3.23 | proximal promoter |
| AT1G15220 | (CCMH)                              | Encodes a prote 1_5241520      | 3.23 | five_prime_UTR    |
| AT5G09320 | (VPS9B)                             | VPS9B; CONT 5_2892883          | 3.23 | proximal promoter |
| AT3G17590 | BUSHY GROWTH (BSH)                  | Encodes the Ar; 3_6019808      | 3.23 | promoter          |
| AT5G07070 | CBL-INTERACTING PROTEIN KINASE 2    | Encodes CBL-ir 5_2198563       | 3.23 | promoter          |
| AT4G16590 | CELLULOSE SYNTHASE-LIKE A01 (CSL    | encodes a gene 4_9347858       | 3.23 | intron            |
| AT4G26500 | CHLOROPLAST SULFUR E (CPSUFE)       | Sulfur acceptor 4_13383714     | 3.23 | promoter          |
| AT3G42670 | CHROMATIN REMODELING 38 (CHR38)     | Encodes a nucl 3_14760729      | 3.23 | proximal promoter |
| AT1G15380 | GLYOXYLASE I 4 (GLY4)               | Lactoylglutathio 1_5291714     | 3.23 | intron            |
| AT2G46180 | GOLGIN CANDIDATE 4 (GC4)            | This gene is pre 2_18971452    | 3.23 | promoter          |
| AT4G02670 | INDETERMINATE(ID)-DOMAIN 12 (IDD12  | indeterminate(I 4_1176252      | 3.23 | exon              |
| AT1G04550 | INDOLE-3-ACETIC ACID INDUCIBLE 12 ( | IAA12/BDL play 1_1240403       | 3.23 | five_prime_UTR    |
| AT3G50310 | MITOGEN-ACTIVATED PROTEIN KINASE    | Encodes a merr 3_18648865      | 3.23 | exon              |
| AT2G30362 | na                                  | Potential natura 2_12939488    | 3.23 | exon              |
| AT4G14300 | na                                  | RNA-binding (R 4_8230812       | 3.23 | promoter          |
| AT1G53370 | na                                  | F-box and asso 1_19913352      | 3.23 | intergenic        |
| AT2G32415 | na                                  | Polynucleotidyl 2_13765567     | 3.23 | promoter          |
| AT1G53380 | na                                  | Plant protein of 1_19913352    | 3.23 | exon              |
| AT4G23895 | na                                  | Pleckstrin homc 4_12426390     | 3.23 | three_prime_UTR   |
| AT4G23910 | na                                  | unknown proteir 4_12426390     | 3.23 | promoter          |
| AT4G23900 | na                                  | Nucleoside diph 4_12426390     | 3.23 | three_prime_UTR   |
| AT5G09655 | na                                  | pre-tRNA; tRNA 5_2993260       | 3.23 | promoter          |
| AT3G07120 | na                                  | RING/U-box sup 3_2254911       | 3.23 | exon              |
| AT5G23690 | na                                  | Polynucleotide 5_7987547       | 3.23 | five_prime_UTR    |
| AT4G36470 | na                                  | S-adenosyl-L-m 4_17214577      | 3.23 | intergenic        |
| AT4G36460 | na                                  | unknown proteir 4_17214577     | 3.23 | proximal promoter |
| AT1G08115 | na                                  | U1A small nucle 1_2538254      | 3.23 | promoter          |
| AT1G26490 | na                                  | pre-tRNA; tRNA 1_9158182       | 3.23 | promoter          |
| AT1G64563 | na                                  | other RNA 1_23978508           | 3.23 | promoter          |
| AT1G79980 | na                                  | pre-tRNA; tRNA 1_30084114      | 3.23 | promoter          |
| AT1G79990 | na                                  | structural molec 1_30084114    | 3.23 | promoter          |
| AT2G14660 | na                                  | unknown proteir 2_6272372      | 3.23 | promoter          |
| AT1G01710 | na                                  | Acyl-CoA thioes 1_266367       | 3.23 | three_prime_UTR   |
| AT1G78840 | na                                  | F-box/RNI-like/f 1_29641272    | 3.23 | promoter          |
| AT3G08880 | na                                  | unknown proteir 3_2702810      | 3.23 | promoter          |
| AT3G16565 | na                                  | alanine-tRNA lig 3_5642767     | 3.23 | promoter          |
| AT3G42150 | na                                  | unknown proteir 3_14309304     | 3.23 | promoter          |
| AT3G56130 | na                                  | biotin/lipoyl attar 3_20826668 | 3.23 | five_prime_UTR    |
| AT4G02720 | na                                  | unknown proteir 4_1205947      | 3.23 | promoter          |
| AT4G02660 | na                                  | Beige/BEACH c 4_1176252        | 3.23 | proximal promoter |
| AT4G02725 | na                                  | unknown proteir 4_1205947      | 3.23 | promoter          |
| AT4G16600 | na                                  | Nucleotide-diph 4_9347858      | 3.23 | proximal promoter |
| AT5G44680 | na                                  | DNA glycosylas 5_18024208      | 3.23 | downstream        |
| AT5G60190 | na                                  | Encodes a prot 5_24234424      | 3.23 | promoter          |
| AT5G35970 | na                                  | P-loop containir 5_14123424    | 3.23 | promoter          |
| AT5G09330 | NAC DOMAIN CONTAINING PROTEIN 82    | NAC domain co 5_2892883        | 3.23 | exon              |
| AT5G09660 | PEROXISOMAL NAD-MALATE DEHYDR       | encodes a micr 5_2993260       | 3.23 | downstream        |
| AT5G65158 | PLAT DOMAIN PROTEIN 3 (PLAT3)       | Lipase/lipooxyq 5_26027920     | 3.23 | proximal promoter |
| AT3G06300 | PROLYL 4-HYDROXYLASE 2 (P4H2)       | Encodes a prol 3_1910886       | 3.23 | intergenic        |
| AT5G09650 | PYROPHOSPHORYLASE 6 (PPa6)          | Encodes a prot 5_2993260       | 3.23 | promoter          |
| AT4G39890 | RAB GTPASE HOMOLOG H1C (RABH1c      | RAB GTPase h 4_18505984        | 3.23 | five_prime_UTR    |
| AT3G07040 | RESISTANCE TO P. SYRINGAE PV MAC    | Contains an N-t 3_2229169      | 3.23 | promoter          |
| AT3G56380 | RESPONSE REGULATOR 17 (RR17)        | response regul 3_20904673      | 3.23 | proximal promoter |
| AT3G03600 | RIBOSOMAL PROTEIN S2 (RPS2)         | Structural comp 3_868645       | 3.23 | promoter          |
| AT4G11370 | RING-H2 FINGER A1A (RHA1A)          | Encodes a puta 4_6908137       | 3.23 | exon              |
| AT2G30360 | SOS3-INTERACTING PROTEIN 4 (SIP4)   | Encodes a SOS 2_12939488       | 3.23 | proximal promoter |
| AT4G34720 | (AVA-P1)                            | vacuolar H+-pui 4_16569395     | 3.22 | promoter          |

|           |                                     |                              |      |                   |
|-----------|-------------------------------------|------------------------------|------|-------------------|
| AT2G37970 | (SOUL-1)                            | SOUL-1; FUNC 2_15890775      | 3.22 | promoter          |
| AT1G69440 | ARGONAUTE7 (AGO7)                   | Encodes ARG 1_26105698       | 3.22 | proximal promoter |
| AT4G26140 | BETA-GALACTOSIDASE 12 (BGAL12)      | putative beta-gal_13249793   | 3.22 | proximal promoter |
| AT3G56000 | CELLULOSE SYNTHASE LIKE A14 (CSL)   | encodes a gene 3_20786243    | 3.22 | promoter          |
| AT1G80790 | FACTOR OF DNA METHYLATION 5 (FDN)   | Belongs to a sui 1_30363294  | 3.22 | three_prime_UTR   |
| AT3G61890 | HOMEBOX 12 (HB-12)                  | Encodes a hom 3_22913465     | 3.22 | intergenic        |
| AT1G14380 | IQ-DOMAIN 28 (IQD28)                | IQ-domain 28 (I 1_4921659    | 3.22 | promoter          |
| AT4G16260 | na                                  | Glycosyl hydrol 4_9199927    | 3.22 | downstream        |
| AT1G26920 | na                                  | unknown protei 1_9328706     | 3.22 | proximal promoter |
| AT1G52590 | na                                  | Putative thiol-di 1_19590373 | 3.22 | promoter          |
| AT1G79510 | na                                  | Uncharacterize 1_29912020    | 3.22 | proximal promoter |
| AT1G79950 | na                                  | RAD3-like DNA 1_30073553     | 3.22 | promoter          |
| AT1G80800 | na                                  | pseudogene, 4C 1_30363294    | 3.22 | proximal promoter |
| AT2G36200 | na                                  | P-loop containir 2_15185494  | 3.22 | promoter          |
| AT1G61900 | na                                  | unknown protei 1_22879915    | 3.22 | intergenic        |
| AT1G79520 | na                                  | Cation efflux far 1_29912020 | 3.22 | downstream        |
| AT3G57120 | na                                  | Protein kinase s 3_21139059  | 3.22 | five_prime_UTR    |
| AT4G02100 | na                                  | Heat shock prot 4_928767     | 3.22 | proximal promoter |
| AT4G17680 | na                                  | SBP (S-ribonuc 4_9844301     | 3.22 | promoter          |
| AT4G30010 | na                                  | unknown protei 4_14674485    | 3.22 | intergenic        |
| AT4G34730 | na                                  | ribosome-bindin 4_16569395   | 3.22 | intron            |
| AT5G08310 | na                                  | Tetratricopeptid 5_2675413   | 3.22 | promoter          |
| AT5G20810 | na                                  | SAUR-like auxir 5_7043758    | 3.22 | promoter          |
| AT5G61950 | na                                  | Ubiquitin carbox 5_24873204  | 3.22 | promoter          |
| AT5G09350 | PHOSPHATIDYLINOSITOL 4-OH KINASE    | Encodes a phos 5_2906257     | 3.22 | promoter          |
| AT4G16250 | PHYTOCHROME D (PHYD)                | Encodes a phyt 4_9199927     | 3.22 | promoter          |
| AT2G31680 | RAB GTPASE HOMOLOG A5D (RABA5d)     | RAB GTPase ho 2_13475061     | 3.22 | promoter          |
| AT1G58470 | RNA-BINDING PROTEIN 1 (RBP1)        | encodes an RN 1_21727013     | 3.22 | promoter          |
| AT1G31600 | TRNA METHYLTRANSFERASE 9 (TRM9)     | RNA-binding (R 1_11316632    | 3.22 | promoter          |
| AT1G70560 | TRYPTOPHAN AMINOTRANSFERASE O       | TAA1 is involve 1_26601969   | 3.22 | proximal promoter |
| AT4G16160 | (ATOEP16-2)                         | Homologous to 4_9157289      | 3.21 | promoter          |
| AT2G38120 | AUXIN RESISTANT 1 (AUX1)            | Encodes an au 2_15964326     | 3.21 | intergenic        |
| AT1G51070 | BASIC HELIX-LOOP-HELIX 115 (bHLH11) | basic Helix-Loo 1_18926785   | 3.21 | proximal promoter |
| AT4G31840 | EARLY NODULIN-LIKE PROTEIN 15 (EN)  | early nodulin-lik 4_15401488 | 3.21 | promoter          |
| AT3G26650 | GLYCERALDEHYDE 3-PHOSPHATE DEH      | Encodes one of 3_9794972     | 3.21 | promoter          |
| AT4G00150 | HAIRY MERISTEM 3 (HAM3)             | Belongs to one 4_59295       | 3.21 | promoter          |
| AT1G51060 | HISTONE H2A 10 (HTA10)              | Encodes HTA1( 1_18926785     | 3.21 | promoter          |
| AT2G42880 | MAP KINASE 20 (MPK20)               | member of MAF 2_17845071     | 3.21 | proximal promoter |
| AT1G15165 | na                                  | RING/FYVE/PH 1_5220263       | 3.21 | promoter          |
| AT2G20480 | na                                  | unknown protei 2_8831622     | 3.21 | promoter          |
| AT1G15670 | na                                  | Galactose oxid 1_5391063     | 3.21 | exon              |
| AT2G46930 | na                                  | Pectinacetylest 2_19283135   | 3.21 | promoter          |
| AT1G64470 | na                                  | Ubiquitin-like su 1_23946220 | 3.21 | promoter          |
| AT4G16155 | na                                  | dihydrolipoyl dei 4_9157289  | 3.21 | exon              |
| AT5G04060 | na                                  | S-adenosyl-L-m 5_1099028     | 3.21 | promoter          |
| AT1G18550 | na                                  | ATP binding mic 1_6384592    | 3.21 | promoter          |
| AT1G66910 | na                                  | Protein kinase s 1_24965278  | 3.21 | proximal promoter |
| AT1G66920 | na                                  | Protein kinase s 1_24965278  | 3.21 | downstream        |
| AT1G69550 | na                                  | disease resistar 1_26153727  | 3.21 | promoter          |
| AT2G06860 | na                                  | transposable elk 2_2764947   | 3.21 | proximal promoter |
| AT2G17305 | na                                  | CONTAINS Inte 2_7525986      | 3.21 | proximal promoter |
| AT2G42955 | na                                  | unknown protei 2_17867749    | 3.21 | promoter          |
| AT1G29450 | na                                  | SAUR-like auxir 1_10306640   | 3.21 | promoter          |
| AT2G43590 | na                                  | Chitinase family 2_18081568  | 3.21 | three_prime_UTR   |
| AT1G68872 | na                                  | Unknown gene 1_25891835      | 3.21 | promoter          |
| AT3G63290 | na                                  | 2-oxoglutarate ( 3_23381594  | 3.21 | promoter          |
| AT3G63280 | NIMA-RELATED KINASE 4 (NEK4)        | Encodes AtNek 3_23381594     | 3.21 | downstream        |
| AT4G22540 | OSBP(OXYSTEROL BINDING PROTEIN)     | OSBP(oxyestero 4_11864538    | 3.21 | intron            |
| AT4G12110 | STEROL-4ALPHA-METHYL OXIDASE 1-1    | Encodes a merr 4_7254028     | 3.21 | promoter          |
| AT2G02760 | UBIQUITIN-CONJUGATING ENZYME 2      | ubiquitin conjug 2_773671    | 3.21 | promoter          |
| AT2G28840 | XB3 ORTHOLOG 1 IN ARABIDOPSIS TH    | XB3 ortholog 1 1_2_12378265  | 3.21 | promoter          |
| AT2G06850 | XYLOGLUCAN ENDOTRANSGLUCOSYL        | endoxyloglucan 2_2764947     | 3.21 | intron            |
| AT1G76410 | (ATL8)                              | ATL8; FUNCTIC 1_28668129     | 3.2  | proximal promoter |
| AT4G26420 | (GAMT1)                             | A member of the 4_13350532   | 3.2  | intergenic        |
| AT3G21870 | CYCLIN P2;1 (CYCP2;1)               | cyclin p2;1 (CY 3_7704954    | 3.2  | promoter          |
| AT2G46840 | DOMAIN OF UNKNOWN FUNCTION 724      | Member of the f 2_19249911   | 3.2  | promoter          |
| AT5G41370 | HOMOLOG OF XERODERMA PIGMENTI       | Encodes XPB1, 5_16551098     | 3.2  | promoter          |
| AT3G21420 | LATERAL BRANCHING OXIDOREDUCTA      | 2-oxoglutarate ( 3_7544350   | 3.2  | intergenic        |
| AT3G06140 | LOG2-LIKE UBIQUITIN LIGASE4 (LUL4)  | Paralog of LOG 3_1856728     | 3.2  | three_prime_UTR   |
| AT5G39240 | na                                  | Encodes a atyp 5_15713148    | 3.2  | promoter          |
| AT1G03240 | na                                  | unknown protei 1_793213      | 3.2  | promoter          |
| AT1G30310 | na                                  | transposable elk 1_10677127  | 3.2  | proximal promoter |
| AT1G74440 | na                                  | Protein of unknt 1_27980512  | 3.2  | promoter          |
| AT2G18320 | na                                  | F-box associate 2_7958019    | 3.2  | intergenic        |
| AT1G30590 | na                                  | RNA polymeras 1_10840004     | 3.2  | five_prime_UTR    |
| AT2G37220 | na                                  | Encodes a chlor 2_15631919   | 3.2  | intergenic        |
| AT3G06130 | na                                  | Heavy metal tra 3_1856728    | 3.2  | proximal promoter |
| AT3G28080 | na                                  | nodulin MtN21-I 3_10451441   | 3.2  | promoter          |
| AT3G55880 | na                                  | A gain-of-functic 3_20737782 | 3.2  | three_prime_UTR   |
| AT3G58060 | na                                  | Cation efflux far 3_21503381 | 3.2  | intergenic        |
| AT4G28400 | na                                  | Protein phosph 4_14047885    | 3.2  | promoter          |
| AT5G37540 | na                                  | Eukaryotic aspa 5_14912079   | 3.2  | proximal promoter |
| AT4G39050 | na                                  | Kinesin motor fe 4_18193040  | 3.2  | promoter          |
| AT1G56430 | NICOTIANAMINE SYNTHASE 4 (NAS4)     | Encodes a prot 1_21133683    | 3.2  | intergenic        |
| AT2G39970 | PEROXISOMAL NAD CARRIER (PXN)       | Encodes peroxi 2_16686749    | 3.2  | promoter          |
| AT3G12250 | TGACG MOTIF-BINDING FACTOR 6 (TG)   | basic leucine zif 3_3905394  | 3.2  | promoter          |
| AT1G64230 | UBIQUITIN-CONJUGATING ENZYME 28     | ubiquitin-conjuga 1_23833540 | 3.2  | promoter          |
| AT3G25620 | ATP-BINDING CASSETTE G21 (ABCG21)   | ABC-2 type tran 3_9319557    | 3.19 | five_prime_UTR    |
| AT5G20540 | BREVIS RADIX-LIKE 4 (BRXL4)         | Belongs to five- 5_6947329   | 3.19 | proximal promoter |
| AT5G40200 | DEGP PROTEASE 9 (DegP9)             | Encodes a puta 5_16070162    | 3.19 | promoter          |
| AT4G17060 | FRIGIDA INTERACTING PROTEIN 2 (FIP) | Encodes one of 4_9595257     | 3.19 | promoter          |
| AT4G21860 | METHIONINE SULFOXIDE REDUCTASE      | methionine sulf 4_11598191   | 3.19 | intergenic        |
| AT1G48830 | na                                  | Ribosomal prote 1_18061474   | 3.19 | promoter          |
| AT1G48840 | na                                  | Plant protein of 1_18061474  | 3.19 | promoter          |

|           |                                     |                              |      |                   |
|-----------|-------------------------------------|------------------------------|------|-------------------|
| AT2G35208 | na                                  | unknown proteir 2_14835193   | 3.19 | proximal promoter |
| AT2G18560 | na                                  | UDP-Glycosyltr 2_8059839     | 3.19 | exon              |
| AT3G47240 | na                                  | transposable elk 3_17397741  | 3.19 | proximal promoter |
| AT5G49440 | na                                  | unknown proteir 5_20049605   | 3.19 | downstream        |
| AT3G06210 | na                                  | ARM repeat sur 3_1880687     | 3.19 | exon              |
| AT5G12940 | na                                  | Leucine-rich ref 5_4088407   | 3.19 | exon              |
| AT1G67480 | na                                  | Galactose oxide 1_25276205   | 3.19 | promoter          |
| AT2G34590 | na                                  | Transketolase fi 2_14571038  | 3.19 | promoter          |
| AT2G40460 | na                                  | Major facilitator 2_16897978 | 3.19 | intron            |
| AT3G25805 | na                                  | unknown proteir 3_9428365    | 3.19 | promoter          |
| AT4G17070 | na                                  | peptidyl-prolyl c 4_9595257  | 3.19 | downstream        |
| AT4G15955 | na                                  | alpha/beta-Hydr 4_9046146    | 3.19 | proximal promoter |
| AT4G15960 | na                                  | alpha/beta-Hydr 4_9046146    | 3.19 | exon              |
| AT4G22170 | na                                  | CONTAINS Inte 4_11736376     | 3.19 | promoter          |
| AT4G26860 | na                                  | Predicted pyridc 4_13505244  | 3.19 | promoter          |
| AT4G26870 | na                                  | Class II aminoai 4_13505244  | 3.19 | promoter          |
| AT5G09880 | na                                  | Splicing factor, i5_3085308  | 3.19 | promoter          |
| AT5G09890 | na                                  | Protein kinase fi 5_3085308  | 3.19 | intergenic        |
| AT5G21130 | na                                  | Late embryoger 5_7186729     | 3.19 | exon              |
| AT5G51170 | na                                  | unknown proteir 5_20795418   | 3.19 | promoter          |
| AT5G55340 | na                                  | MBOAT (memb 5_22441163       | 3.19 | promoter          |
| AT3G54960 | PDI-LIKE 1-3 (PDL1-3)               | Encodes a prots 3_20366944   | 3.19 | promoter          |
| AT2G29650 | PHOSPHATE TRANSPORTER 4:1 (PHT4     | Encodes an ino 2_12676128    | 3.19 | promoter          |
| AT1G70730 | PHOSPHOGLUCOMUTASE 2 (PGM2)         | Encodes a cyto: 1_26672988   | 3.19 | intron            |
| AT1G28230 | PURINE PERMEASE 1 (PUP1)            | Encodes a trans 1_9864713    | 3.19 | promoter          |
| AT3G57860 | UV-B-INSENSITIVE 4-LIKE (UVI4-LIKE) | Encodes a prot 3_21426123    | 3.19 | promoter          |
| AT2G45190 | ABNORMAL FLORAL ORGANS (AFO)        | Encodes a merr 2_18632204    | 3.18 | proximal promoter |
| AT3G46970 | ALPHA-GLUCAN PHOSPHORYLASE 2 (F     | Encodes a cyto: 3_17306513   | 3.18 | promoter          |
| AT2G16500 | ARGININE DECARBOXYLASE 1 (ADC1)     | encodes a argir 2_7153295    | 3.18 | five_prime_UTR    |
| AT5G52570 | BETA-CAROTENE HYDROXYLASE 2 (BE     | Converts &#94f 5_21335583    | 3.18 | intron            |
| AT3G56940 | COPPER RESPONSE DEFECT 1 (CRD1)     | Encodes a puta 3_21076367    | 3.18 | promoter          |
| AT5G14320 | EMBRYO DEFECTIVE 3137 (EMB3137)     | Ribosomal prote 5_4618963    | 3.18 | promoter          |
| AT5G10140 | FLOWERING LOCUS C (FLC)             | MADS-box prot 5_3179554      | 3.18 | promoter          |
| AT2G44950 | HISTONE MONO-UBIQUITINATION 1 (HL   | The gene encoc 2_18548612    | 3.18 | promoter          |
| AT4G29150 | IQ-DOMAIN 25 (IQD25)                | IQ-domain 25 (I 4_14376693   | 3.18 | proximal promoter |
| AT2G17130 | ISOCITRATE DEHYDROGENASE SUBU       | Encodes a requ 2_7462649     | 3.18 | promoter          |
| AT3G56930 | na                                  | DHHC-type zinc 3_21076367    | 3.18 | downstream        |
| AT5G55640 | na                                  | unknown proteir 5_22534150   | 3.18 | promoter          |
| AT5G09800 | na                                  | ARM repeat sur 5_3043471     | 3.18 | exon              |
| AT3G02840 | na                                  | ARM repeat sur 3_618842      | 3.18 | exon              |
| AT5G02730 | na                                  | CAP (Cysteine- 5_615846      | 3.18 | exon              |
| AT1G66820 | na                                  | glycine-rich prot 1_24930903 | 3.18 | intergenic        |
| AT1G66830 | na                                  | Leucine-rich ref 1_24930903  | 3.18 | exon              |
| AT3G14130 | na                                  | Aldolase-type T 3_4688303    | 3.18 | five_prime_UTR    |
| AT1G04790 | na                                  | RING/U-box suj 1_1344979     | 3.18 | promoter          |
| AT1G06650 | na                                  | encodes a prote 1_2035703    | 3.18 | promoter          |
| AT1G22110 | na                                  | structural consti 1_7802555  | 3.18 | five_prime_UTR    |
| AT1G49420 | na                                  | Heavy metal tra 1_18288073   | 3.18 | exon              |
| AT1G80870 | na                                  | Protein kinase s 1_30391112  | 3.18 | proximal promoter |
| AT2G02960 | na                                  | RING/FYVE/PH 2_864472        | 3.18 | promoter          |
| AT2G03250 | na                                  | EXS (ERD1/XPI 2_982183       | 3.18 | exon              |
| AT2G30120 | na                                  | unknown proteir 2_12863201   | 3.18 | proximal promoter |
| AT1G06645 | na                                  | 2-oxoglutarate ( 1_2035703   | 3.18 | downstream        |
| AT2G39300 | na                                  | unknown proteir 2_16413705   | 3.18 | promoter          |
| AT2G44970 | na                                  | alpha/beta-Hydr 2_18548612   | 3.18 | downstream        |
| AT1G74088 | na                                  | FUNCTIONS IN 1_27861112      | 3.18 | promoter          |
| AT3G11130 | na                                  | Claithrin, heavy 3_3491961   | 3.18 | promoter          |
| AT2G23171 | na                                  | unknown proteir 2_9868858    | 3.18 | proximal promoter |
| AT2G25800 | na                                  | CONTAINS Inte 2_11010585     | 3.18 | proximal promoter |
| AT2G28200 | na                                  | C2H2-type zinc 2_12021523    | 3.18 | proximal promoter |
| AT3G16740 | na                                  | F-box and asso 3_5699281     | 3.18 | promoter          |
| AT4G18570 | na                                  | Tetratricopeptid 4_10233670  | 3.18 | intron            |
| AT4G18580 | na                                  | unknown proteir 4_10233670   | 3.18 | intergenic        |
| AT4G31351 | na                                  | This gene encoi 4_15216290   | 3.18 | proximal promoter |
| AT5G40720 | na                                  | CONTAINS Inte 5_16297239     | 3.18 | proximal promoter |
| AT4G35905 | na                                  | unknown proteir 4_17008214   | 3.18 | promoter          |
| AT5G65535 | na                                  | pre-tRNA; tRNA 5_26195576    | 3.18 | downstream        |
| AT3G46980 | PHOSPHATE TRANSPORTER 4:3 (PHT4     | Encodes an ino 3_17306513    | 3.18 | intergenic        |
| AT2G38670 | PHOSPHORYLETHANOLAMINE CYTIDY       | Encodes a mito: 2_16168681   | 3.18 | promoter          |
| AT3G02850 | STELAR K+ OUTWARD RECTIFIER (SKC    | Encodes SKOR 3_618842        | 3.18 | intergenic        |
| AT5G60970 | TEOSINTE BRANCHED 1, CYCLOIDEA A    | TCP gene invol 5_24538150    | 3.18 | proximal promoter |
| AT3G15355 | UBIQUITIN-CONJUGATING ENZYME 25     | ubiquitin-conjuq 3_5183534   | 3.18 | promoter          |
| AT5G48230 | ACETOACETYL-COA THIOLASE 2 (ACA1    | Encodes an ace 5_19555315    | 3.17 | five_prime_UTR    |
| AT2G37300 | ATP-BINDING CASSETTE I16 (ABC116)   | unknown proteir 2_15662476   | 3.17 | downstream        |
| AT5G52060 | BCL-2-ASSOCIATED ATHANOGENE 1 (E    | A member of Ar 5_21156257    | 3.17 | proximal promoter |
| AT5G53130 | CYCLIC NUCLEOTIDE GATED CHANNEL     | member of Cycl 5_21540962    | 3.17 | five_prime_UTR    |
| AT3G11170 | FATTY ACID DESATURASE 7 (FAD7)      | Chloroplastic er 3_3499327   | 3.17 | promoter          |
| AT2G45200 | GOLGI SNARE 12 (GOS12)              | Encodes a merr 2_18639907    | 3.17 | intron            |
| AT2G22496 | MICRORNA779A (MIR779A)              | Encodes a micr 2_9561712     | 3.17 | intergenic        |
| AT5G67080 | MITOGEN-ACTIVATED PROTEIN KINASE    | member of MEK 5_26770532     | 3.17 | proximal promoter |
| AT1G11430 | MULTIPLE ORGANELLAR RNA EDITING     | Encodes a prot 1_3849243     | 3.17 | downstream        |
| AT1G12190 | na                                  | F-box and asso 1_4132454     | 3.17 | intergenic        |
| AT1G73870 | na                                  | B-box type zinc 1_27781008   | 3.17 | intergenic        |
| AT1G73875 | na                                  | DNAse I-like suj 1_27781008  | 3.17 | five_prime_UTR    |
| AT3G10780 | na                                  | emp24/gp25L/p 3_3374970      | 3.17 | promoter          |
| AT3G10770 | na                                  | Single-stranded 3_3374970    | 3.17 | proximal promoter |
| AT5G57340 | na                                  | unknown proteir 5_23222956   | 3.17 | intergenic        |
| AT1G67570 | na                                  | Protein of unkn 1_25325197   | 3.17 | five_prime_UTR    |
| AT1G07380 | na                                  | Neutral/alkaline 1_2266579   | 3.17 | exon              |
| AT1G11440 | na                                  | BEST Arabidop: 1_3849243     | 3.17 | promoter          |
| AT1G17570 | na                                  | pre-tRNA; tRNA 1_6038795     | 3.17 | exon              |
| AT1G48325 | na                                  | Expressed prot 1_17860431    | 3.17 | intergenic        |
| AT1G73580 | na                                  | Calcium-depend 1_27656273    | 3.17 | intergenic        |
| AT2G17787 | na                                  | unknown proteir 2_7731066    | 3.17 | promoter          |

|           |                                        |                              |      |                   |
|-----------|----------------------------------------|------------------------------|------|-------------------|
| AT2G23330 | na                                     | transposable elk 2_9932801   | 3.17 | promoter          |
| AT1G11300 | na                                     | protein serine/thr 1_3794124 | 3.17 | promoter          |
| AT2G37290 | na                                     | Ypt/Rab-GAP d 2_15662476     | 3.17 | proximal promoter |
| AT2G41770 | na                                     | Protein of unknc 2_17427292  | 3.17 | promoter          |
| AT2G45750 | na                                     | S-adenosyl-L-m 2_18842086    | 3.17 | promoter          |
| AT3G09010 | na                                     | Protein kinase s 3_2749423   | 3.17 | proximal promoter |
| AT3G11165 | na                                     | unknown proteir 3_3499327    | 3.17 | promoter          |
| AT2G32760 | na                                     | unknown proteir 2_13894841   | 3.17 | downstream        |
| AT3G22770 | na                                     | F-box associate 3_8048663    | 3.17 | exon              |
| AT3G50590 | na                                     | Transducin/WD 3_18770893     | 3.17 | promoter          |
| AT4G22530 | na                                     | S-adenosyl-L-m 4_11859531    | 3.17 | exon              |
| AT4G39380 | na                                     | FUNCTIONS IN 4_18312892      | 3.17 | promoter          |
| AT4G39820 | na                                     | Tetratricopeptid 4_18478384  | 3.17 | promoter          |
| AT5G02340 | na                                     | Cysteine/Histidi 5_494994    | 3.17 | proximal promoter |
| AT5G22090 | na                                     | Protein of unknc 5_7318595   | 3.17 | intron            |
| AT5G37740 | na                                     | Calcium-depent 5_14992763    | 3.17 | intron            |
| AT4G30996 | NA(+)- AND K(+)-SENSITIVE 1 (NKS1)     | NKS1, a plant-s 4_15101278   | 3.17 | promoter          |
| AT4G22540 | OSBP(OXYSTEROL BINDING PROTEIN)        | OSBP(oxyestero 4_11859531    | 3.17 | intergenic        |
| AT5G58360 | OVATE FAMILY PROTEIN 3 (OFP3)          | ovate family pro 5_23588233  | 3.17 | intergenic        |
| AT2G45740 | PEROXIN 11D (PEX11D)                   | member of the r 2_18842086   | 3.17 | intergenic        |
| AT2G32765 | SMALL UBIQUITINRELATED MODIFIER 1      | Encodes a smal 2_13894841    | 3.17 | promoter          |
| AT5G13750 | ZINC INDUCED FACILITATOR-LIKE 1 (ZIF1) | zinc induced fac 5_4438116   | 3.17 | promoter          |
| AT3G12400 | (ELC)                                  | Mutants of this r 3_3945877  | 3.16 | promoter          |
| AT5G13490 | ADP/ATP CARRIER 2 (AAC2)               | Encodes mitoch 5_4335334     | 3.16 | promoter          |
| AT3G01770 | BROMODOMAIN AND EXTRATERMINAL          | bromodomain a 3_278875       | 3.16 | promoter          |
| AT5G41610 | CATION/H+ EXCHANGER 18 (CHX18)         | member of Puta 5_16638247    | 3.16 | downstream        |
| AT5G50250 | CHLOROPLAST RNA-BINDING PROTEIN        | Encodes a RNA 5_20454286     | 3.16 | promoter          |
| AT1G08130 | DNA LIGASE 1 (LIG1)                    | Encodes the Ar: 1_2548336    | 3.16 | promoter          |
| AT3G03810 | EMBRYO SAC DEVELOPMENT ARREST          | embryo sac dev 3_976526      | 3.16 | promoter          |
| AT2G20680 | ENDO-BETA-MANNASE 2 (MAN2)             | Glycosyl hydroly 2_8919968   | 3.16 | promoter          |
| AT2G44840 | ETHYLENE-RESPONSIVE ELEMENT BINDING    | encodes a mem 2_18495355     | 3.16 | five_prime_UTR    |
| AT1G73250 | GDP-4-KETO-6-DEOXYMANNOSE-3,5-EPI      | encodes a bifun 1_27546524   | 3.16 | promoter          |
| AT5G15570 | na                                     | Bromodomain tr 5_5066168     | 3.16 | promoter          |
| AT3G56330 | na                                     | N2,N2-dimethylr 3_20890167   | 3.16 | promoter          |
| AT3G54830 | na                                     | Transmembran 3_20316906      | 3.16 | proximal promoter |
| AT4G04692 | na                                     | pseudogene of 4_2375746      | 3.16 | intron            |
| AT2G31990 | na                                     | Exostosin family 2_13612903  | 3.16 | intron            |
| AT3G09470 | na                                     | Major facilitator 3_2911349  | 3.16 | intron            |
| AT5G09800 | na                                     | ARM repeat sup 5_3045224     | 3.16 | proximal promoter |
| AT1G28600 | na                                     | GDSL-like Lipas 1_10053260   | 3.16 | promoter          |
| AT1G28610 | na                                     | GDSL-like Lipas 1_10053260   | 3.16 | intergenic        |
| AT1G43997 | na                                     | Pseudogene of 1_16705482     | 3.16 | proximal promoter |
| AT1G63410 | na                                     | Protein of unknc 1_23509844  | 3.16 | downstream        |
| AT1G69250 | na                                     | Nuclear transp 1_26035578    | 3.16 | downstream        |
| AT2G36402 | na                                     | transposable elk 2_15275245  | 3.16 | intergenic        |
| AT1G69252 | na                                     | other RNA 1_26035578         | 3.16 | proximal promoter |
| AT3G14075 | na                                     | Mono-/di-acylql 3_4667074    | 3.16 | intron            |
| AT3G32917 | na                                     | transposable elk 3_13480788  | 3.16 | proximal promoter |
| AT3G44400 | na                                     | Disease resistai 3_16049778  | 3.16 | promoter          |
| AT4G10130 | na                                     | DNAJ heat shor 4_6321664     | 3.16 | promoter          |
| AT4G18820 | na                                     | AAA-type ATPa 4_10329901     | 3.16 | promoter          |
| AT4G20320 | na                                     | CTP synthase fi 4_10970983   | 3.16 | intergenic        |
| AT5G13240 | na                                     | transcription rec 5_4229566  | 3.16 | proximal promoter |
| AT4G31170 | na                                     | Protein kinase s 4_15156566  | 3.16 | proximal promoter |
| AT4G31180 | na                                     | Class II aminoac 4_15156566  | 3.16 | intron            |
| AT4G38401 | na                                     | unknown proteir 4_17979887   | 3.16 | promoter          |
| AT4G38405 | na                                     | unknown proteir 4_17979887   | 3.16 | intergenic        |
| AT5G41605 | na                                     | pre-tRNA; tRNA 5_16638247    | 3.16 | exon              |
| AT5G41612 | na                                     | Potential natura 5_16638247  | 3.16 | promoter          |
| AT5G66240 | na                                     | Transducin/WD 5_26466112     | 3.16 | promoter          |
| AT4G35790 | PHOSPHOLIPASE D DELTA (PLDDELTA)       | Encodes a prote 4_16960192   | 3.16 | promoter          |
| AT1G14870 | PLANT CADMIUM RESISTANCE 2 (PCR2)      | PCR2 encodes 1_5128996       | 3.16 | exon              |
| AT4G29720 | POLYAMINE OXIDASE 5 (PAO5)             | polyamine oxid 4_14558694    | 3.16 | intergenic        |
| AT4G35800 | RNA POLYMERASE II LARGE SUBUNIT 1      | Encodes the un 4_16960192    | 3.16 | intergenic        |
| AT5G41600 | VIRB2-INTERACTING PROTEIN 3 (BT3)      | VIRB2-interactir 5_16638247  | 3.16 | intergenic        |
| AT1G80920 | (J8)                                   | A nuclear encor 1_30404593   | 3.15 | five_prime_UTR    |
| AT1G13280 | ALLENE OXIDE CYCLASE 4 (AOC4)          | Encodes allene 1_4548628     | 3.15 | three_prime_UTR   |
| AT1G08080 | ALPHA CARBONIC ANHYDRASE 7 (ACA7)      | alpha carbonic : 1_2520845   | 3.15 | proximal promoter |
| AT1G60260 | BETA GLUCOSIDASE 5 (BGLU5)             | beta glucosidas 1_22221535   | 3.15 | promoter          |
| AT1G60270 | BETA GLUCOSIDASE 6 (BGLU6)             | beta glucosidas 1_22221535   | 3.15 | downstream        |
| AT4G28860 | CASEIN KINASE I-LIKE 4 (ckl4)          | casein kinase I- 4_14246225  | 3.15 | promoter          |
| AT1G55620 | CHLORIDE CHANNEL F (CLC-F)             | Encodes a chlci 1_20791249   | 3.15 | promoter          |
| AT3G55040 | GLUTATHIONE TRANSFERASE LAMBDA 1       | Encodes a merr 3_20400324    | 3.15 | five_prime_UTR    |
| AT2G46370 | JASMONATE RESISTANT 1 (JAR1)           | Encodes a jasmr 2_19033685   | 3.15 | promoter          |
| AT1G77860 | KOMPEITO (KOM)                         | mutant has Alte 1_29282026   | 3.15 | intergenic        |
| AT1G11000 | MILDEW RESISTANCE LOCUS O 4 (MLC4)     | A member of a l 1_3671248    | 3.15 | intergenic        |
| AT2G23290 | MYB DOMAIN PROTEIN 70 (MYB70)          | Member of the f 2_9905899    | 3.15 | five_prime_UTR    |
| AT5G12980 | na                                     | Cell differentiati 5_4108154 | 3.15 | five_prime_UTR    |
| AT3G09500 | na                                     | Ribosomal L29 : 3_2916862    | 3.15 | promoter          |
| AT3G15290 | na                                     | 3-hydroxyacyl-C 3_5144872    | 3.15 | promoter          |
| AT3G25400 | na                                     | CONTAINS Inte 3_9213031      | 3.15 | promoter          |
| AT1G55625 | na                                     | pre-tRNA; tRNA 1_20791249    | 3.15 | promoter          |
| AT1G17145 | na                                     | RING/U-box su 1_5862704      | 3.15 | promoter          |
| AT3G55960 | na                                     | Haloacid dehalc 3_20763209   | 3.15 | promoter          |
| AT5G21326 | na                                     | Ca2+regulated : 5_7222150    | 3.15 | downstream        |
| AT5G21378 | na                                     | pre-tRNA; tRNA 5_7222150     | 3.15 | promoter          |
| AT1G06790 | na                                     | RNA polymeras 1_2089884      | 3.15 | downstream        |
| AT1G10990 | na                                     | unknown proteir 1_3671248    | 3.15 | promoter          |
| AT1G56230 | na                                     | Protein of unknc 1_21048675  | 3.15 | intron            |
| AT1G72855 | na                                     | Potential natura 1_27416135  | 3.15 | promoter          |
| AT1G79190 | na                                     | ARM repeat su 1_29788443     | 3.15 | promoter          |
| AT2G17030 | na                                     | CONTAINS Inte 2_7399017      | 3.15 | promoter          |
| AT1G80930 | na                                     | MIF4G domain- 1_30404593     | 3.15 | intergenic        |
| AT3G17830 | na                                     | Molecular chapr 3_6101756    | 3.15 | promoter          |

|           |                                     |                              |      |                   |
|-----------|-------------------------------------|------------------------------|------|-------------------|
| AT3G26511 | na                                  | unknown proteir 3_9717158    | 3.15 | intergenic        |
| AT3G55050 | na                                  | Protein phosph 3_20400324    | 3.15 | downstream        |
| AT3G60320 | na                                  | Protein of unkn 3_22296802   | 3.15 | proximal promoter |
| AT4G00585 | na                                  | unknown proteir 4_252684     | 3.15 | promoter          |
| AT4G00590 | na                                  | N-terminal nucle 4_252684    | 3.15 | promoter          |
| AT4G31200 | na                                  | SWAP (Suppre: 4_15164992     | 3.15 | promoter          |
| AT4G39020 | na                                  | SH3 domain-coi 4_18183192    | 3.15 | intron            |
| AT5G21430 | NADH DEHYDROGENASE-LIKE COMPLI      | Chaperone Dna 5_7222150      | 3.15 | promoter          |
| AT1G06800 | PHOSPHOLIPASE A I GAMMA 1 (PLA-I)   | g Encodes a lipas 1_2089884  | 3.15 | intron            |
| AT1G61520 | PHOTOSYSTEM I LIGHT HARVESTING C    | PSI type III chlo 1_22699978 | 3.15 | intron            |
| AT5G65830 | RECEPTOR LIKE PROTEIN 57 (RLP57)    | receptor like prc 5_26343331 | 3.15 | promoter          |
| AT5G05080 | UBIQUITIN-CONJUGATING ENZYME 22     | ubiquitin-conjug 5_1500826   | 3.15 | promoter          |
| AT5G63860 | UVB-RESISTANCE 8 (UVR8)             | UV-B-specific si 5_25559901  | 3.15 | promoter          |
| AT5G61840 | (GUT1)                              | GUT1; CONTAI 5_24842095      | 3.14 | promoter          |
| AT5G67520 | ADENOSINE-5'-PHOSPHOSULFATE (AP     | Provides activat 5_26941101  | 3.14 | downstream        |
| AT1G28290 | ARABINOGLACTAN PROTEIN 31 (AGP      | Encodes an aty1_9892817      | 3.14 | proximal promoter |
| AT5G22740 | CELLULOSE SYNTHASE-LIKE A02 (CSL    | encodes a beta- 5_7559240    | 3.14 | intron            |
| AT3G27160 | GLUCOSE HYPERSENSITIVE 1 (GHS1)     | GHS1 encodes 3_10017378      | 3.14 | promoter          |
| AT2G17480 | MILDEW RESISTANCE LOCUS O 8 (MLC    | A member of a l 2_7597395    | 3.14 | intergenic        |
| AT4G39120 | MYO-INOSITOL MONOPHOSPHATASE L      | Encodes a chloi_18227935     | 3.14 | exon              |
| AT3G30300 | na                                  | O-fucosyltransf 3_11924386   | 3.14 | five_prime_UTR    |
| AT4G29103 | na                                  | unknown proteir 4_14346735   | 3.14 | promoter          |
| AT1G16100 | na                                  | pre-tRNA; tRNA 1_5518265     | 3.14 | promoter          |
| AT2G37035 | na                                  | unknown proteir 2_15556838   | 3.14 | promoter          |
| AT1G12390 | na                                  | Cornichon famil 1_4220044    | 3.14 | promoter          |
| AT5G27770 | na                                  | Ribosomal L22e 5_9835827     | 3.14 | promoter          |
| AT1G34220 | na                                  | Regulator of Vp 1_12466169   | 3.14 | promoter          |
| AT1G27285 | na                                  | transposable elk 1_9478783   | 3.14 | exon              |
| AT1G27290 | na                                  | unknown proteir 1_9478783    | 3.14 | proximal promoter |
| AT3G05675 | na                                  | BTB/POZ doma 3_1657478       | 3.14 | intergenic        |
| AT3G18620 | na                                  | DHHC-type zinc 3_6408067     | 3.14 | promoter          |
| AT3G05670 | na                                  | RING/U-box prc 3_1657478     | 3.14 | intergenic        |
| AT3G44430 | na                                  | unknown proteir 3_16068850   | 3.14 | exon              |
| AT3G57950 | na                                  | unknown proteir 3_21460314   | 3.14 | promoter          |
| AT4G17620 | na                                  | glycine-rich prot 4_9821861  | 3.14 | promoter          |
| AT4G26400 | na                                  | RING/U-box suj 4_13346586    | 3.14 | five_prime_UTR    |
| AT4G17616 | na                                  | Pentatricopeptic 4_9821861   | 3.14 | downstream        |
| AT4G33960 | na                                  | unknown proteir 4_16275129   | 3.14 | proximal promoter |
| AT4G26410 | na                                  | Uncharacterise 4_13346586    | 3.14 | promoter          |
| AT5G02385 | na                                  | pre-tRNA; tRNA 5_508138      | 3.14 | intergenic        |
| AT5G03560 | na                                  | Tetratricopeptid 5_902820    | 3.14 | promoter          |
| AT5G38300 | na                                  | unknown proteir 5_15307632   | 3.14 | intergenic        |
| AT5G42880 | na                                  | Plant protein of 5_17191394  | 3.14 | promoter          |
| AT5G44568 | na                                  | unknown proteir 5_17962201   | 3.14 | five_prime_UTR    |
| AT5G55600 | na                                  | agenet domain- 5_22525700    | 3.14 | promoter          |
| AT4G33950 | OPEN STOMATA 1 (OST1)               | Encodes calciur 4_16275129   | 3.14 | intergenic        |
| AT5G67530 | PLANT U-BOX 49 (PUB49)              | plant U-box 49 ( 5_26941101  | 3.14 | promoter          |
| AT2G37080 | ROP INTERACTIVE PARTNER 3 (RIP3)    | Encodes RIP3 ( 2_15585273    | 3.14 | promoter          |
| AT5G56760 | SERINE ACETYLTTRANSFERASE 1;1 (SE   | Encodes a cyto: 5_22962715   | 3.14 | promoter          |
| AT1G06110 | SKP1/ASK-INTERACTING PROTEIN 16 (   | SKP1/ASK-inter 1_1855085     | 3.14 | promoter          |
| AT4G08810 | (SUB1)                              | Calcium binding 4_5618820    | 3.13 | proximal promoter |
| AT4G08930 | APR-LIKE 6 (APRL6)                  | Encodes a prot 4_5729434     | 3.13 | five_prime_UTR    |
| AT2G06255 | ELF4-LIKE 3 (ELF4-L3)               | ELF4-like 3 (ELI 2_2458818   | 3.13 | intron            |
| AT1G79830 | GOLGIN CANDIDATE 5 (GC5)            | This gene is pre 1_30027643  | 3.13 | downstream        |
| AT3G57550 | GUANYLATE KINASE (AGK2)             | guanylate kinas 3_21305106   | 3.13 | proximal promoter |
| AT2G18170 | MAP KINASE 7 (MPK7)                 | MAP kinase 7 (I 2_7905563    | 3.13 | intergenic        |
| AT2G39200 | MILDEW RESISTANCE LOCUS O 12 (ML    | A member of a l 2_16361967   | 3.13 | proximal promoter |
| AT4G16770 | na                                  | 2-oxoglutarate ( 4_9440846   | 3.13 | intergenic        |
| AT2G38610 | na                                  | RNA-binding Kf 2_16150056    | 3.13 | promoter          |
| AT5G43870 | na                                  | FUNCTIONS IN 5_17636847      | 3.13 | proximal promoter |
| AT5G02860 | na                                  | Pentatricopeptic 5_653867    | 3.13 | promoter          |
| AT2G33140 | na                                  | pre-tRNA; tRNA 2_14047423    | 3.13 | exon              |
| AT2G38180 | na                                  | SGNH hydrolas 2_15995734     | 3.13 | proximal promoter |
| AT3G23510 | na                                  | Cyclopropane-fi 3_8428440    | 3.13 | intron            |
| AT3G45030 | na                                  | Ribosomal prote 3_16472500   | 3.13 | promoter          |
| AT3G51500 | na                                  | unknown proteir 3_19108062   | 3.13 | promoter          |
| AT3G42170 | na                                  | transposase-like 3_14318369  | 3.13 | proximal promoter |
| AT3G45040 | na                                  | Encodes a puta 3_16472500    | 3.13 | downstream        |
| AT3G47630 | na                                  | CONTAINS Inte 3_17565524     | 3.13 | promoter          |
| AT3G55795 | na                                  | pre-tRNA; tRNA 3_20709398    | 3.13 | downstream        |
| AT5G18490 | na                                  | Plant protein of 5_6133937   | 3.13 | downstream        |
| AT5G15120 | na                                  | Protein of unkn 5_4898658    | 3.13 | promoter          |
| AT5G60570 | na                                  | Galactose oxid 5_24350795    | 3.13 | intergenic        |
| AT1G51390 | NFU DOMAIN PROTEIN 5 (NFU5)         | Encodes a prot 1_19050330    | 3.13 | promoter          |
| AT2G33150 | PEROXISOMAL 3-KETOACYL-COA THIO     | Encodes an org 2_14047423    | 3.13 | downstream        |
| AT5G18480 | PLANT GLYCOGENIN-LIKE STARCH INI    | plant glycogenir 5_6133937   | 3.13 | promoter          |
| AT2G34640 | PLASTID TRANSCRIPTIONALLY ACTIVE    | Present in trans 2_14587841  | 3.13 | intergenic        |
| AT5G55260 | PROTEIN PHOSPHATASE X 2 (PPX2)      | Encodes a prot 5_22416479    | 3.13 | promoter          |
| AT3G55800 | SEDOHEPTULOSE-BISPHOSPHATASE (      | Encodes the ch 3_20709398    | 3.13 | five_prime_UTR    |
| AT1G79820 | SUPPRESSOR OF G PROTEIN BETA1 (S    | SUPPRESSOR 1_30027643        | 3.13 | promoter          |
| AT3G47620 | TEOSINTE BRANCHED, CYCLOIDEA AN     | Encodes a trans 3_17556098   | 3.13 | proximal promoter |
| AT2G27760 | TRNAISOPENTENYLTRANSFERASE 2 (I     | Encodes tRNA i 2_11827742    | 3.13 | downstream        |
| AT2G02810 | UDP-GALACTOSE TRANSPORTER 1 (U      | Encodes a multi 2_800851     | 3.13 | proximal promoter |
| AT4G04640 | (ATPC1)                             | One of two gene 4_2352012    | 3.12 | five_prime_UTR    |
| AT4G37790 | (HAT22)                             | Encodes homec 4_17767912     | 3.12 | promoter          |
| AT4G13510 | AMMONIUM TRANSPORTER 1;1 (AMT1;     | Encodes a plasi 4_7858086    | 3.12 | promoter          |
| AT3G50000 | CASEIN KINASE II, ALPHA CHAIN 2 (CK | Encodes the ca 3_18534447    | 3.12 | promoter          |
| AT5G49910 | CHLOROPLAST HEAT SHOCK PROTEIN      | Stromal heat sh 5_20303224   | 3.12 | promoter          |
| AT5G12170 | CRT (CHLOROQUINE-RESISTANCE TR      | Encodes one of 5_3931551     | 3.12 | promoter          |
| AT3G11220 | ELONGATA 1 (ELO1)                   | A subunit of Elo 3_3513484   | 3.12 | downstream        |
| AT5G03280 | ETHYLENE INSENSITIVE 2 (EIN2)       | Involved in ethy 5_785582    | 3.12 | proximal promoter |
| AT1G64970 | GAMMA-TOCOPHEROL METHYLTRANS        | gamma-tocophe 1_24136141     | 3.12 | promoter          |
| AT3G23290 | LIGHT SENSITIVE HYPOCOTYLS 4 (LSH   | LIGHT SENSITI 3_8325709      | 3.12 | proximal promoter |
| AT5G54270 | LIGHT-HARVESTING CHLOROPHYLL B-     | Lhcb3 protein is 5_22038306  | 3.12 | five_prime_UTR    |

|           |                                   |                    |            |      |                   |
|-----------|-----------------------------------|--------------------|------------|------|-------------------|
| AT5G54260 | MEIOTIC RECOMBINATION 11 (MRE11)  | DNA repair and     | 5_22038306 | 3.12 | intergenic        |
| AT1G70645 | MICRORNA777A (MIR777A)            | Encodes a micr     | 1_26637727 | 3.12 | promoter          |
| AT3G11210 | na                                | SGNH hydrolas      | 3_3513484  | 3.12 | promoter          |
| AT3G01961 | na                                | unknown protei     | 3_326149   | 3.12 | intergenic        |
| AT1G65950 | na                                | Protein kinase s   | 1_24551217 | 3.12 | promoter          |
| AT1G66070 | na                                | Translation initia | 1_24598596 | 3.12 | promoter          |
| AT1G11300 | na                                | protein serine/t   | 1_3797635  | 3.12 | intron            |
| AT1G31660 | na                                | CONTAINS Inte      | 1_11330766 | 3.12 | downstream        |
| AT1G78010 | na                                | tRNA modificati    | 1_29333405 | 3.12 | promoter          |
| AT3G58035 | na                                | pre-tRNA; tRNA     | 3_21487426 | 3.12 | downstream        |
| AT4G13505 | na                                | Potential natura   | 4_7858086  | 3.12 | exon              |
| AT5G64400 | na                                | BEST Arabidop;     | 5_25750527 | 3.12 | downstream        |
| AT5G24890 | na                                | unknown protei     | 5_8559416  | 3.12 | promoter          |
| AT5G64401 | na                                | unknown protei     | 5_25750527 | 3.12 | exon              |
| AT1G08100 | NITRATE TRANSPORTER 2.2 (NRT2.2)  | Encodes a high     | 1_2530389  | 3.12 | proximal promoter |
| AT5G64410 | OLIGOPEPTIDE TRANSPORTER 4 (OPT   | oligopeptide tra   | 5_25750527 | 3.12 | intergenic        |
| AT4G06746 | RELATED TO AP2 9 (RAP2.9)         | encodes a mem      | 4_4073733  | 3.12 | downstream        |
| AT1G31650 | RHO GUANYL-NUCLEOTIDE EXCHANGI    | Encodes a mem      | 1_11330766 | 3.12 | promoter          |
| AT1G31480 | SHOOT GRAVITROPISM 2 (SGR2)       | encodes a nove     | 1_11265794 | 3.12 | promoter          |
| AT2G31880 | SUPPRESSOR OF BIR1 1 (SOBIR1)     | Encodes a puta     | 2_13554969 | 3.12 | exon              |
| AT5G46350 | WRKY DNA-BINDING PROTEIN 8 (WRK)  | member of WR       | 5_18804685 | 3.12 | proximal promoter |
| AT3G28210 | (PMZ)                             | Encodes a puta     | 3_10520287 | 3.11 | promoter          |
| AT4G19700 | (RING)                            | Encodes BOI (E     | 4_10713021 | 3.11 | intergenic        |
| AT3G19190 | AUTOPHAGY 2 (ATG2)                | Encodes autoph     | 3_6639645  | 3.11 | promoter          |
| AT1G64990 | GPCR-TYPE G PROTEIN 1 (GTG1)      | Encodes a GPC      | 1_24146155 | 3.11 | intron            |
| AT2G46260 | LIGHT-RESPONSE BTB 1 (LRB1)       | Involvement in     | 2_18995949 | 3.11 | promoter          |
| AT1G28395 | na                                | unknown protei     | 1_9971503  | 3.11 | five_prime_UTR    |
| AT5G64130 | na                                | cAMP-regulatec     | 5_25666322 | 3.11 | promoter          |
| AT3G28200 | na                                | Peroxidase sup     | 3_10520287 | 3.11 | intergenic        |
| AT4G25433 | na                                | peptidoglycan-b    | 4_13002817 | 3.11 | proximal promoter |
| AT1G11950 | na                                | Transcription fa   | 1_4039487  | 3.11 | proximal promoter |
| AT1G55270 | na                                | Galactose oxid     | 1_20620057 | 3.11 | five_prime_UTR    |
| AT2G44255 | na                                | Potential natura   | 2_18297645 | 3.11 | promoter          |
| AT2G44260 | na                                | Plant protein of   | 2_18297645 | 3.11 | exon              |
| AT3G19184 | na                                | AP2/B3-like trar   | 3_6639645  | 3.11 | intergenic        |
| AT3G26539 | na                                | unknown protei     | 3_9740498  | 3.11 | intergenic        |
| AT3G53960 | na                                | Major facilitator  | 3_19980983 | 3.11 | promoter          |
| AT3G61810 | na                                | Glycosyl hydro     | 3_22876984 | 3.11 | promoter          |
| AT4G02800 | na                                | unknown protei     | 4_1249917  | 3.11 | promoter          |
| AT4G03298 | na                                | unknown protei     | 4_1446425  | 3.11 | promoter          |
| AT4G31510 | na                                | unknown protei     | 4_15276132 | 3.11 | downstream        |
| AT4G34600 | na                                | unknown protei     | 4_16527838 | 3.11 | proximal promoter |
| AT5G44010 | na                                | unknown protei     | 5_17709446 | 3.11 | promoter          |
| AT5G12950 | na                                | FUNCTIONS IN       | 5_4091286  | 3.11 | proximal promoter |
| AT5G17780 | na                                | alpha/beta-Hydr    | 5_5869062  | 3.11 | promoter          |
| AT2G01650 | PLANT UBX DOMAIN-CONTAINING PRO   | encodes a per      | 2_286643   | 3.11 | promoter          |
| AT3G54480 | SKP1/ASK-INTERACTING PROTEIN 5 (S | Encodes an SK      | 3_20173438 | 3.11 | promoter          |
| AT1G49950 | TELOMERE REPEAT BINDING FACTOR    | Encodes a telor    | 1_18497254 | 3.11 | promoter          |
| AT3G13360 | WPP DOMAIN INTERACTING PROTEIN :  | Encodes an out     | 3_4340476  | 3.11 | promoter          |
| AT3G51800 | (ATG2)                            | putative nuclear   | 3_19213783 | 3.1  | promoter          |
| AT2G35600 | BREVIS RADIX-LIKE 1 (BRXL1)       | Belongs to five-   | 2_14943980 | 3.1  | intron            |
| AT1G07430 | HIGHLY ABA-INDUCED PP2C GENE 2 (H | highly ABA-indu    | 1_2284401  | 3.1  | proximal promoter |
| AT5G02770 | MODIFIER OF SNC1, 11 (MOS11)      | Encodes a cons     | 5_629379   | 3.1  | promoter          |
| AT3G57560 | N-ACETYL-L-GLUTAMATE KINASE (NAG  | encodes a N-ac     | 3_21312330 | 3.1  | promoter          |
| AT2G46230 | na                                | PIN domain-like    | 2_18986034 | 3.1  | promoter          |
| AT4G33980 | na                                | FUNCTIONS IN       | 4_16285197 | 3.1  | promoter          |
| AT1G63950 | na                                | Heavy metal tra    | 1_23734644 | 3.1  | promoter          |
| AT1G05140 | na                                | Peptidase M50      | 1_1482479  | 3.1  | promoter          |
| AT1G63730 | na                                | Disease resist     | 1_23645194 | 3.1  | downstream        |
| AT1G63740 | na                                | Disease resist     | 1_23645194 | 3.1  | promoter          |
| AT1G76630 | na                                | Tetrapicopeptid    | 1_28759433 | 3.1  | promoter          |
| AT1G77160 | na                                | Protein of unkn    | 1_28997848 | 3.1  | proximal promoter |
| AT2G02060 | na                                | Homeodomain-l      | 2_497263   | 3.1  | intron            |
| AT2G02061 | na                                | Nucleotide-diph    | 2_497263   | 3.1  | proximal promoter |
| AT2G19120 | na                                | P-loop containr    | 2_8292370  | 3.1  | five_prime_UTR    |
| AT2G38350 | na                                | unknown protei     | 2_16069220 | 3.1  | exon              |
| AT2G45245 | na                                | Unknown gene       | 2_18661375 | 3.1  | promoter          |
| AT2G45250 | na                                | Integral membr     | 2_18661375 | 3.1  | promoter          |
| AT1G76620 | na                                | Protein of unkn    | 1_28759433 | 3.1  | downstream        |
| AT3G13335 | na                                | pre-tRNA; tRNA     | 3_4330919  | 3.1  | downstream        |
| AT3G62220 | na                                | Protein kinase s   | 3_23031217 | 3.1  | promoter          |
| AT4G09150 | na                                | T-complex prote    | 4_5828522  | 3.1  | intron            |
| AT4G03180 | na                                | CONTAINS Inte      | 4_1403070  | 3.1  | promoter          |
| AT4G37440 | na                                | unknown protei     | 4_17601188 | 3.1  | promoter          |
| AT5G14700 | na                                | NAD(P)-binding     | 5_4740913  | 3.1  | intron            |
| AT5G18710 | na                                | Domain of unkn     | 5_6240998  | 3.1  | promoter          |
| AT5G38020 | na                                | encodes a prote    | 5_15170359 | 3.1  | proximal promoter |
| AT2G28610 | PRESSED FLOWER (PRS)              | Encodes a hom      | 2_12259537 | 3.1  | proximal promoter |
| AT3G13330 | PROTEASOME ACTIVATING PROTEIN 2   | Encodes a prote    | 3_4330919  | 3.1  | proximal promoter |
| AT1G16240 | SYNTAXIN OF PLANTS 51 (SYP51)     | Encodes one of     | 1_5556859  | 3.1  | promoter          |
| AT5G59340 | WUSCHEL RELATED HOMEBOX 2 (W      | Encodes a WUS      | 5_23934758 | 3.1  | promoter          |
| AT5G33290 | XYLOGALACTURONAN DEFICIENT 1 (X   | Acts as a xylog    | 5_12560205 | 3.1  | exon              |
| AT5G56130 | (TEX1)                            | Encodes a com      | 5_22725238 | 3.09 | promoter          |
| AT5G36880 | ACETYL-COA SYNTHETASE (ACS)       | Encodes a plasi    | 5_14540373 | 3.09 | promoter          |
| AT2G38400 | ALANINE:GLYOXYLATE AMINOTRANSF    | alanine:glyoxyla   | 2_16083732 | 3.09 | five_prime_UTR    |
| AT3G55260 | BETA-HEXOSAMINIDASE 1 (HEXO1)     | Encodes a prote    | 3_20489065 | 3.09 | promoter          |
| AT5G24630 | BRASSINOSTEROID-INSENSITIVE4 (BIN | This gene is pre   | 5_8436152  | 3.09 | five_prime_UTR    |
| AT3G20410 | CALMODULIN-DOMAIN PROTEIN KINAS   | calmodulin-dom     | 3_7115958  | 3.09 | promoter          |
| AT4G28880 | CASEIN KINASE I-LIKE 3 (ckl3)     | casein kinase I-   | 4_14251111 | 3.09 | promoter          |
| AT2G01505 | CLAVATA3/ESR-RELATED 16 (CLE16)   | Member of a lar    | 2_229900   | 3.09 | proximal promoter |
| AT1G49970 | CLP PROTEASE PROTEOLYTIC SUBUN    | Encodes a ClpF     | 1_18504748 | 3.09 | promoter          |
| AT1G17470 | DEVELOPMENTALLY REGULATED G-PF    | Encodes a mem      | 1_6002872  | 3.09 | promoter          |
| AT4G21200 | GIBBERELLIN 2-OXIDASE 8 (GA2OX8)  | Encodes a prote    | 4_11305594 | 3.09 | intron            |
| AT5G57350 | H(+)-ATPASE 3 (HA3)               | member of Plas     | 5_23235690 | 3.09 | intron            |

|           |                                               |                   |               |                   |                   |
|-----------|-----------------------------------------------|-------------------|---------------|-------------------|-------------------|
| AT3G17609 | HY5-HOMOLOG (HYH)                             | Encodes a hom     | 3_6023716     | 3.09              | promoter          |
| AT1G26945 | KIDARI (KDR)                                  | Encodes a basi    | 1_9349026     | 3.09              | proximal promoter |
| AT5G14010 | KNUCKLES (KNU)                                | Encodes KNUC      | 5_4521126     | 3.09              | proximal promoter |
| AT3G27220 | na                                            | Galactose oxide   | 3_10053848    | 3.09              | promoter          |
| AT3G27230 | na                                            | S-adenosyl-L-m    | 3_10053848    | 3.09              | promoter          |
| AT5G21960 | na                                            | encodes a mem     | 5_7258833     | 3.09              | exon              |
| AT3G60260 | na                                            | ELMO/CED-12       | 3_22273877    | 3.09              | five_prime_UTR    |
| AT1G32290 | na                                            | unknown protei    | 1_11650988    | 3.09              | promoter          |
| AT1G49975 | na                                            | INVOLVED IN;      | i_1_18504748  | 3.09              | promoter          |
| AT1G69980 | na                                            | unknown protei    | 1_26357805    | 3.09              | promoter          |
| AT1G79740 | na                                            | hAT transposon    | 1_30007043    | 3.09              | promoter          |
| AT2G01510 | na                                            | Tetratricopeptid  | 2_229900      | 3.09              | intergenic        |
| AT2G29210 | na                                            | splicing factor   | P_2_12557967  | 3.09              | promoter          |
| AT2G30105 | na                                            | CONTAINS Inte     | 2_12849659    | 3.09              | promoter          |
| AT2G30180 | na                                            | pre-tRNA; tRNA    | 2_12881550    | 3.09              | promoter          |
| AT2G37190 | na                                            | Ribosomal prote   | 2_15620190    | 3.09              | promoter          |
| AT2G30100 | na                                            | pentatricopeptic  | 2_12849659    | 3.09              | three_prime_UTR   |
| AT2G36470 | na                                            | Plant protein of  | 2_15300808    | 3.09              | five_prime_UTR    |
| AT3G51720 | na                                            | Plant protein of  | 3_19186638    | 3.09              | downstream        |
| AT3G51730 | na                                            | sapoin B doma     | 3_19186638    | 3.09              | promoter          |
| AT4G11300 | na                                            | CONTAINS Inte     | 4_6877031     | 3.09              | intergenic        |
| AT4G21445 | na                                            | unknown protei    | 4_11424723    | 3.09              | five_prime_UTR    |
| AT5G41900 | na                                            | alpha/beta-Hydr   | 5_16771085    | 3.09              | intron            |
| AT5G14080 | na                                            | Tetratricopeptid  | 5_4545446     | 3.09              | promoter          |
| AT5G27710 | na                                            | unknown protei    | 5_9812942     | 3.09              | promoter          |
| AT5G43140 | na                                            | Peroxisomal me    | 5_17321347    | 3.09              | promoter          |
| AT5G50805 | na                                            | pre-tRNA; tRNA    | 5_20675303    | 3.09              | downstream        |
| AT5G59613 | na                                            | unknown protei    | 5_24016629    | 3.09              | promoter          |
| AT1G79750 | NADP-MALIC ENZYME 4 (NADP-ME4)                | The malic enzyr   | 1_30007043    | 3.09              | intergenic        |
| AT2G30170 | PHOTOSYSTEM II CORE PHOSPHATAS                | Encodes a chl     | 2_12881550    | 3.09              | promoter          |
| AT4G21210 | PPDK REGULATORY PROTEIN (RP1)                 | Encodes a PPD     | 4_11305594    | 3.09              | proximal promoter |
| AT4G35020 | RAC-LIKE 3 (RAC3)                             | A member of R     | 4_16672451    | 3.09              | intron            |
| AT2G37180 | RESPONSIVE TO DESICCATION 28 (RD)             | a member of the   | 2_15620190    | 3.09              | intergenic        |
| AT3G14350 | STRUBBELIG-RECEPTOR FAMILY 7 (SR STRUBBELIG-r | 3_4788004         | 3.09          | proximal promoter |                   |
| AT5G43130 | TBP-ASSOCIATED FACTOR 4 (TAF4)                | TBP-associated    | 5_17321347    | 3.09              | promoter          |
| AT1G17460 | TRF-LIKE 3 (TRFL3)                            | Arabidopsis th    | 1_6002872     | 3.09              | downstream        |
| AT1G24100 | UDP-GLUCOSYL TRANSFERASE 74B1 (               | Encodes a UDF     | 1_8525246     | 3.09              | downstream        |
| AT2G47170 | (ARF1A1C)                                     | Gene encoding     | 2_19366498    | 3.08              | promoter          |
| AT4G34030 | 3-METHYLCROTONYL-COA CARBOXYL                 | MCC-B is invol    | 4_16304151    | 3.08              | downstream        |
| AT1G27450 | ADENINE PHOSPHORIBOSYL TRANSFE                | Adenosine phos    | 1_9534457     | 3.08              | intergenic        |
| AT3G24503 | ALDEHYDE DEHYDROGENASE 2C4 (AL                | Arabidopsis th    | 3_8926027     | 3.08              | proximal promoter |
| AT5G15160 | BANQUO 2 (BNQ2)                               | BNQ2 belongs      | 1_5_4926004   | 3.08              | intergenic        |
| AT2G26900 | BILE ACID:SODIUM SYMPORTER FAMIL              | Sodium Bile aci   | 2_11478863    | 3.08              | proximal promoter |
| AT1G48310 | CHROMATIN REMODELING FACTOR18                 | chromatin remo    | 1_17853958    | 3.08              | promoter          |
| AT5G01600 | FERRITIN 1 (FER1)                             | Encodes a ferr    | 5_226922      | 3.08              | intergenic        |
| AT3G21260 | GLYCOLIPID TRANSFER PROTEIN 3 (GI             | Glycolipid tran   | 3_7464998     | 3.08              | intron            |
| AT1G73360 | HOMEDOMAIN GLABROUS 11 (HDG11                 | Encodes a hom     | 1_27584176    | 3.08              | proximal promoter |
| AT3G50630 | KIP-RELATED PROTEIN 2 (KRP2)                  | Kip-related prot  | 3_18800295    | 3.08              | promoter          |
| AT5G45550 | MOB1-LIKE (MOB1-like)                         | Encodes a gene    | 5_18462121    | 3.08              | promoter          |
| AT2G18193 | na                                            | P-loop containir  | 2_7919490     | 3.08              | promoter          |
| AT5G49743 | na                                            | transposable el   | 5_20208976    | 3.08              | promoter          |
| AT5G49746 | na                                            | transposable el   | 5_20208976    | 3.08              | promoter          |
| AT4G34040 | na                                            | RING/U-box suj    | 4_16304151    | 3.08              | downstream        |
| AT4G34035 | na                                            | pre-tRNA; tRNA    | 4_16304151    | 3.08              | exon              |
| AT1G06860 | na                                            | pre-tRNA; tRNA    | 1_2108030     | 3.08              | proximal promoter |
| AT1G14205 | na                                            | Ribosomal L18;    | 1_4855447     | 3.08              | promoter          |
| AT1G15450 | na                                            | pre-tRNA; tRNA    | 1_5309576     | 3.08              | downstream        |
| AT2G17490 | na                                            | transposable el   | 2_7604114     | 3.08              | proximal promoter |
| AT1G48315 | na                                            | Potential natura  | 1_17853958    | 3.08              | promoter          |
| AT3G11580 | na                                            | AP2/B3-like trar  | 3_3652547     | 3.08              | proximal promoter |
| AT4G16680 | na                                            | P-loop containir  | 4_9391745     | 3.08              | proximal promoter |
| AT5G01595 | na                                            | Potential natura  | 5_226922      | 3.08              | promoter          |
| AT4G32250 | na                                            | Protein kinase    | s_4_15573381  | 3.08              | promoter          |
| AT5G57580 | na                                            | Calmodulin-binc   | 5_23314497    | 3.08              | downstream        |
| AT5G62680 | na                                            | Major facilitator | 5_25168125    | 3.08              | promoter          |
| AT5G01590 | na                                            | unknown protei    | 5_226922      | 3.08              | three_prime_UTR   |
| AT5G56520 | na                                            | unknown protei    | 5_22884392    | 3.08              | proximal promoter |
| AT5G57570 | na                                            | GCK domain-cc     | 5_23314497    | 3.08              | promoter          |
| AT1G27460 | NO POLLEN GERMINATION RELATED 1               | encodes a calm    | 1_9534457     | 3.08              | promoter          |
| AT4G32260 | PIGMENT DEFECTIVE 334 (PDE334)                | ATPase, F0 cor    | 4_15573381    | 3.08              | intergenic        |
| AT1G73370 | SUCROSE SYNTHASE 6 (SUS6)                     | Encodes a prot    | 1_27584176    | 3.08              | intergenic        |
| AT2G43710 | SUPPRESSOR OF SA INSENSITIVE 2 (S             | Encodes a stea    | 2_18119287    | 3.08              | proximal promoter |
| AT1G03680 | THIOREDOXIN M-TYPE 1 (THM1)                   | encodes a chl     | 1_918130      | 3.08              | promoter          |
| AT2G19450 | TRIACYLGLYCEROL BIOSYNTHESIS DE               | Encodes Acyl-C    | 2_8424693     | 3.08              | proximal promoter |
| AT5G15170 | TYROSYL-DNA PHOSPHODIESTERASE                 | tyrosyl-DNA ph    | 5_4926004     | 3.08              | downstream        |
| AT3G03900 | ADENOSINE-5'-PHOSPHOSULFATE (AP               | Provides activ    | 3_1004980     | 3.07              | proximal promoter |
| AT4G33300 | ADR1-LIKE 1 (ADR1-L1)                         | Encodes a merr    | 4_16056587    | 3.07              | promoter          |
| AT3G63410 | ALBINO OR PALE GREEN MUTANT 1 (A)             | Encodes a MPE     | 3_23417189    | 3.07              | promoter          |
| AT5G07320 | ATP/PHOSPHATE CARRIER 3 (APC3)                | Encodes a mito    | 5_2309886     | 3.07              | promoter          |
| AT1G22840 | CYTOCHROME C-1 (CYTC-1)                       | Encodes cytoch    | 1_8080691     | 3.07              | downstream        |
| AT3G63420 | GGAMMA-SUBUNIT 1 (GG1)                        | heterotrimeric    | G_3_23417189  | 3.07              | promoter          |
| AT2G43910 | HARMLESS TO OZONE LAYER 1 (HOL1)              | HARMLESS TC       | 2_18184166    | 3.07              | intergenic        |
| AT2G43900 | INOSITOL-POLYPHOSPHATE 5-PHOSPH               | Encodes a 5-inc   | 2_18184166    | 3.07              | promoter          |
| AT1G51960 | IQ-DOMAIN 27 (IQD27)                          | IQ-domain 27      | (I_1_19308042 | 3.07              | proximal promoter |
| AT2G19600 | K+ EFFLUX ANTIPORTER 4 (KEA4)                 | member of Puta    | 2_8479050     | 3.07              | promoter          |
| AT1G50260 | N-TERMINAL-TRANSMEMBRANE-C2 DC                | N-terminal-trans  | 1_18621881    | 3.07              | promoter          |
| AT1G55820 | na                                            | CONTAINS Inte     | 1_20864225    | 3.07              | promoter          |
| AT5G07315 | na                                            | pre-tRNA; tRNA    | 5_2309886     | 3.07              | promoter          |
| AT5G16010 | na                                            | 3-oxo-5-alpha-s   | 5_5227514     | 3.07              | promoter          |
| AT3G03702 | na                                            | Potential natura  | 3_918984      | 3.07              | promoter          |
| AT1G69060 | na                                            | Chaperone Dna     | 1_25964489    | 3.07              | five_prime_UTR    |
| AT3G13070 | na                                            | CBS domain-co     | 3_4195521     | 3.07              | promoter          |
| AT3G23550 | na                                            | MATE efflux fan   | 3_8450760     | 3.07              | promoter          |
| AT4G13505 | na                                            | Potential natura  | 4_7860695     | 3.07              | proximal promoter |

|           |                                                   |                               |      |                   |
|-----------|---------------------------------------------------|-------------------------------|------|-------------------|
| AT4G33060 | na                                                | Cyclophilin-like 4_15948415   | 3.07 | promoter          |
| AT1G22850 | na                                                | SNARE associa 1_8080691       | 3.07 | exon              |
| AT2G15980 | na                                                | Tetratricopeptid 2_6952762    | 3.07 | exon              |
| AT1G54820 | na                                                | Protein kinase s 1_20445797   | 3.07 | proximal promoter |
| AT1G76880 | na                                                | Duplicated hom 1_28865379     | 3.07 | promoter          |
| AT2G28390 | na                                                | SAND family pr 2_12143525     | 3.07 | promoter          |
| AT3G24120 | na                                                | Homeodomain-l 3_8708218       | 3.07 | intron            |
| AT3G27910 | na                                                | Galactose oxid 3_10358867     | 3.07 | proximal promoter |
| AT4G14740 | na                                                | FUNCTIONS IN 4_8454939        | 3.07 | proximal promoter |
| AT4G33310 | na                                                | unknown proteir 4_16056587    | 3.07 | downstream        |
| AT4G36230 | na                                                | unknown proteir 4_17144860    | 3.07 | proximal promoter |
| AT5G11980 | na                                                | conserved oligo 5_3872358     | 3.07 | promoter          |
| AT4G22540 | OSBP(OXYSTEROL BINDING PROTEIN)                   | OSBP(oxystero 4_11868171      | 3.07 | proximal promoter |
| AT1G15110 | PHOSPHATIDYLSERINE SYNTHASE 1 (F PSS1             | encodes : 1_5196913           | 3.07 | proximal promoter |
| AT1G55810 | URIDINE KINASE-LIKE 3 (UKL3)                      | One of the hom 1_20864225     | 3.07 | three_prime_UTR   |
| AT3G46010 | ACTIN DEPOLYMERIZING FACTOR 1 (AI Actin-depolymer | 3_16909251                    | 3.06 | downstream        |
| AT3G46000 | ACTIN DEPOLYMERIZING FACTOR 2 (AI                 | Encodes depoly 3_16909251     | 3.06 | promoter          |
| AT4G19710 | ASPARTATE KINASE-HOMOSERINE DEI                   | Encodes a bifur 4_10722144    | 3.06 | proximal promoter |
| AT1G08450 | CALRETIICULIN 3 (CRT3)                            | Encodes one of 1_2671959      | 3.06 | promoter          |
| AT2G02560 | CULLIN-ASSOCIATED AND NEDDYLYTIC                  | Arabidopsis tha 2_689692      | 3.06 | promoter          |
| AT4G31770 | DEBRANCHING ENZYME 1 (DBR1)                       | Encodes a RNA 4_15372761      | 3.06 | promoter          |
| AT3G10160 | DHFS-FPGS HOMOLOG C (DFC)                         | Encodes a prote 3_3144766     | 3.06 | promoter          |
| AT1G07110 | FRUCTOSE-2,6-BISPHOSPHATASE (F2P                  | Encodes the bif 1_2184180     | 3.06 | promoter          |
| AT1G08460 | HISTONE DEACETYLASE 8 (HDA08)                     | histone deacety 1_2671959     | 3.06 | promoter          |
| AT1G63005 | MICRORNA399B (MIR399B)                            | Encodes a phos 1_23344717     | 3.06 | intergenic        |
| AT2G39170 | na                                                | unknown proteir 2_16336265    | 3.06 | promoter          |
| AT1G25460 | na                                                | NAD(P)-binding 1_8944449      | 3.06 | downstream        |
| AT1G22430 | na                                                | GroES-like zinc 1_7919164     | 3.06 | five_prime_UTR    |
| AT3G13226 | na                                                | regulatory prote 3_4266374    | 3.06 | promoter          |
| AT1G75140 | na                                                | unknown proteir 1_28204524    | 3.06 | promoter          |
| AT1G75150 | na                                                | unknown proteir 1_28204524    | 3.06 | three_prime_UTR   |
| AT2G19130 | na                                                | S-locus lectin pr 2_8293656   | 3.06 | promoter          |
| AT2G25210 | na                                                | Ribosomal prote 2_10739791    | 3.06 | promoter          |
| AT1G01830 | na                                                | ARM repeat sur 1_298584       | 3.06 | three_prime_UTR   |
| AT1G18680 | na                                                | HNH endonucle 1_6433468       | 3.06 | promoter          |
| AT2G39130 | na                                                | Transmembran 2_16327806       | 3.06 | proximal promoter |
| AT3G02645 | na                                                | Plant protein of 3_567902     | 3.06 | downstream        |
| AT3G02650 | na                                                | Tetratricopeptid 3_567902     | 3.06 | promoter          |
| AT3G15160 | na                                                | unknown proteir 3_5104288     | 3.06 | promoter          |
| AT3G55646 | na                                                | unknown proteir 3_20642837    | 3.06 | proximal promoter |
| AT4G36270 | na                                                | ATP binding; BE 4_17160865    | 3.06 | downstream        |
| AT4G36268 | na                                                | unknown proteir 4_17160865    | 3.06 | downstream        |
| AT5G63320 | NUCLEAR PROTEIN X1 (NPX1)                         | Encodes NPX1 5_25373976       | 3.06 | intergenic        |
| AT5G63310 | NUCLEOSIDE DIPHOSPHATE KINASE 2                   | Maintains intrac 5_25373976   | 3.06 | promoter          |
| AT1G01820 | PEROXIN 11C (PEX11C)                              | member of the r 1_298584      | 3.06 | promoter          |
| AT1G75840 | RAC-LIKE GTP BINDING PROTEIN 5 (AR                | Belongs to the r 1_28475735   | 3.06 | five_prime_UTR    |
| AT3G49430 | SERINE/ARGININE-RICH PROTEIN SPLI                 | Barta et al (2011) 3_18331582 | 3.06 | five_prime_UTR    |
| AT5G57990 | UBIQUITIN-SPECIFIC PROTEASE 23 (UE                | Encodes a ubiq 5_23475696     | 3.06 | proximal promoter |
| AT1G78130 | UNFERTILIZED EMBRYO SAC 2 (UNE2)                  | unfertilized emb 1_29400014   | 3.06 | promoter          |
| AT1G10550 | XYLOGLUCAN:XYLOGLUCOSYL TRANS                     | Encodes a merr 1_3479493      | 3.06 | exon              |
| AT3G45100 | (SETH2)                                           | encodes Arabid 3_16504420     | 3.05 | promoter          |
| AT1G58350 | (ZW18)                                            | ZW18; INVOLV 1_21669868       | 3.05 | proximal promoter |
| AT1G21710 | 8-OXOGUANINE-DNA GLYCOSYLASE 1                    | Encodes 8-oxox 1_7624329      | 3.05 | promoter          |
| AT1G58080 | ATP PHOSPHORIBOSYL TRANSFERASE                    | ATP phosphorit 1_21507485     | 3.05 | five_prime_UTR    |
| AT5G57660 | CONSTANS-LIKE 5 (COL5)                            | CONSTANS-like 5_23353941      | 3.05 | proximal promoter |
| AT3G19760 | EUKARYOTIC INITIATION FACTOR 4A-III               | Encodes an RN 3_6863666       | 3.05 | promoter          |
| AT5G27380 | GLUTATHIONE SYNTHETASE 2 (GSH2)                   | Encodes a prote 5_9671445     | 3.05 | promoter          |
| AT5G42780 | HOMEODOMAIN PROTEIN 27 (HB27)                     | homeobox prote 5_17154717     | 3.05 | promoter          |
| AT3G01100 | HYPOTHETICAL PROTEIN 1 (HYP1)                     | unknown proteir 3_34691       | 3.05 | downstream        |
| AT5G09805 | INFLORESCENCE DEFICIENT IN ABSCI                  | Similar to Inflore 5_3049597  | 3.05 | intergenic        |
| AT4G36890 | IRREGULAR XYLEM 14 (IRX14)                        | The IRX14 gene 4_17382097     | 3.05 | promoter          |
| AT3G58680 | MULTIPROTEIN BRIDGING FACTOR 1B                   | One of three ge 3_21706845    | 3.05 | promoter          |
| AT1G74650 | MYB DOMAIN PROTEIN 31 (MYB31)                     | Member of the f 1_28040804    | 3.05 | promoter          |
| AT5G02320 | MYB DOMAIN PROTEIN 3R-5 (MYB3R-5)                 | Encodes a puta 5_486843       | 3.05 | promoter          |
| AT5G17250 | na                                                | Alkaline-phosph 5_5675057     | 3.05 | proximal promoter |
| AT4G21920 | na                                                | unknown proteir 4_11637815    | 3.05 | proximal promoter |
| AT3G45095 | na                                                | transposable elk 3_16504420   | 3.05 | promoter          |
| AT5G65880 | na                                                | unknown proteir 5_26352900    | 3.05 | promoter          |
| AT1G06510 | na                                                | unknown proteir 1_1992293     | 3.05 | promoter          |
| AT1G06515 | na                                                | Protein of unknc 1_1992293    | 3.05 | promoter          |
| AT2G29340 | na                                                | NAD-dependen 2_12596949       | 3.05 | promoter          |
| AT2G33250 | na                                                | unknown proteir 2_14097333    | 3.05 | promoter          |
| AT3G03570 | na                                                | FUNCTIONS IN 3_856731         | 3.05 | promoter          |
| AT3G58676 | na                                                | This gene encod 3_21706845    | 3.05 | exon              |
| AT3G59950 | na                                                | Peptidase famih 3_22147982    | 3.05 | promoter          |
| AT4G19380 | na                                                | Long-chain fatty 4_10570378   | 3.05 | intron            |
| AT5G09876 | na                                                | unknown proteir 5_3078952     | 3.05 | proximal promoter |
| AT4G29680 | na                                                | Alkaline-phosph 4_14539911    | 3.05 | promoter          |
| AT4G31740 | na                                                | Sec1/munc18-lik 4_15363541    | 3.05 | promoter          |
| AT5G27395 | na                                                | Mitochondrial in 5_9671445    | 3.05 | downstream        |
| AT5G46250 | na                                                | RNA-binding pr 5_18755244     | 3.05 | promoter          |
| AT5G54630 | na                                                | zinc finger prote 5_22192061  | 3.05 | intergenic        |
| AT5G60460 | na                                                | Preprotein trans 5_24318045   | 3.05 | promoter          |
| AT1G52880 | NO APICAL MERISTEM (NAM)                          | Transcription fa 1_19692567   | 3.05 | proximal promoter |
| AT1G65390 | PHLOEM PROTEIN 2 A5 (PP2-A5)                      | phloem protein : 1_24292263   | 3.05 | promoter          |
| AT1G70370 | POLYGALACTURONASE 2 (PG2)                         | polygalacturona 1_26518443    | 3.05 | intergenic        |
| AT3G58500 | PROTEIN PHOSPHATASE 2A-4 (PP2A-4)                 | Encodes one of 3_21639095     | 3.05 | five_prime_UTR    |
| AT1G49600 | RNA-BINDING PROTEIN 47A (RBP47A)                  | RNA-binding pr 1_18360446     | 3.05 | promoter          |
| AT1G43850 | SEUSS (SEU)                                       | Encodes a trans 1_16617106    | 3.05 | promoter          |
| AT3G01090 | SNF1 KINASE HOMOLOG 10 (KIN10)                    | encodes a SNF 3_34691         | 3.05 | promoter          |
| AT3G59770 | SUPPRESSOR OF ACTIN 9 (SAC9)                      | Encodes a phos 3_22086251     | 3.05 | promoter          |
| AT5G16850 | TELOMERASE REVERSE TRANSCRIPT/                    | Encodes the ca 5_5543662      | 3.05 | promoter          |
| AT1G53300 | TETRAATRICOPEPTIDE-REPEAT THIORE                  | Encodes one of 1_19879542     | 3.05 | five_prime_UTR    |
| AT1G64040 | TYPE ONE SERINE/THREONINE PROTE                   | Encodes the ca 1_23760505     | 3.05 | five_prime_UTR    |



|           |                                     |                   |              |      |                   |
|-----------|-------------------------------------|-------------------|--------------|------|-------------------|
| AT1G14140 | UNCOUPLING PROTEIN 3 (UCP3)         | Mitochondrial st  | 1_4839747    | 3.05 | promoter          |
| AT1G32200 | (ATS1)                              | Encodes a chl     | 1_11604969   | 3.04 | exon              |
| AT3G06500 | ALKALINE/NEUTRAL INVERTASE C (A/N   | Plant neutral inv | 3_2008575    | 3.04 | intergenic        |
| AT5G49480 | CA2+-BINDING PROTEIN 1 (CP1)        | AtCP1 encodes     | 5_20069774   | 3.04 | proximal promoter |
| AT1G22840 | CYTOCHROME C-1 (CYTC-1)             | Encodes cytoch    | 1_8079307    | 3.04 | five_prime_UTR    |
| AT4G12330 | CYTOCHROME P450, FAMILY 706, SUBF   | member of CYP     | 4_7318849    | 3.04 | exon              |
| AT4G05420 | DAMAGED DNA BINDING PROTEIN 1A (    | Structurally simi | 4_2745757    | 3.04 | promoter          |
| AT2G40300 | FERRITIN 4 (FER4)                   | Encodes FERR      | 2_16833347   | 3.04 | promoter          |
| AT1G74420 | FUCOSYLTRANSFERASE 3 (FUT3)         | Predicted fucos   | 1_27971241   | 3.04 | proximal promoter |
| AT5G62480 | GLUTATHIONE S-TRANSFERASE TAU 9     | Encodes glutath   | 5_25088614   | 3.04 | downstream        |
| AT1G25250 | INDETERMINATE (ID)-DOMAIN 16 (IDD16 | indeterminate(IL  | 1_8848398    | 3.04 | proximal promoter |
| AT3G09710 | IQ-DOMAIN 1 (IQD1)                  | Ca(2+)-depend     | 3_2979339    | 3.04 | intron            |
| AT1G13220 | LITTLE NUCLEI2 (LINC2)              | Encodes a nucl    | 1_4520185    | 3.04 | intron            |
| AT1G68510 | LOB DOMAIN-CONTAINING PROTEIN 42    | LOB domain-co     | 1_25708390   | 3.04 | downstream        |
| AT3G23165 | LOW-MOLECULAR-WEIGHT CYSTEINE-      | Encodes a merr    | 3_8264233    | 3.04 | intergenic        |
| AT1G61732 | MICRORNA776A (MIR776A)              | Encodes a micr    | 1_22795235   | 3.04 | promoter          |
| AT2G36600 | na                                  | pre-tRNA; tRNA    | 2_15346917   | 3.04 | intergenic        |
| AT5G44375 | na                                  | pre-tRNA; tRNA    | 5_17878334   | 3.04 | proximal promoter |
| AT1G67510 | na                                  | Leucine-rich rep  | 1_25298102   | 3.04 | exon              |
| AT2G33205 | na                                  | Serinc-domain c   | 2_14074547   | 3.04 | proximal promoter |
| AT4G33700 | na                                  | FUNCTIONS IN      | 4_16179549   | 3.04 | promoter          |
| AT1G10440 | na                                  | pre-tRNA; tRNA    | 1_3431148    | 3.04 | downstream        |
| AT1G38140 | na                                  | transposable el   | 1_14305598   | 3.04 | intergenic        |
| AT1G13230 | na                                  | Encodes a leuci   | 1_4520185    | 3.04 | promoter          |
| AT1G22830 | na                                  | Tetratricopeptid  | 1_8079307    | 3.04 | downstream        |
| AT2G44640 | na                                  | FUNCTIONS IN      | 2_18417135   | 3.04 | promoter          |
| AT2G45630 | na                                  | D-isomer specif   | 2_18798167   | 3.04 | intergenic        |
| AT2G22482 | na                                  | na                | 2_9550179    | 3.04 | promoter          |
| AT4G09040 | na                                  | RNA-binding (R    | 4_5797407    | 3.04 | promoter          |
| AT4G12650 | na                                  | Endomembrane      | 4_7470594    | 3.04 | promoter          |
| AT5G61520 | na                                  | Major facilitator | 5_24741328   | 3.04 | promoter          |
| AT5G13140 | na                                  | Pollen Ole e 1    | a 5_4171901  | 3.04 | promoter          |
| AT5G65685 | na                                  | UDP-Glycosyltr    | 5_26278352   | 3.04 | proximal promoter |
| AT1G67500 | RECOVERY PROTEIN 3 (REV3)           | Encodes the ca    | 1_25298102   | 3.04 | proximal promoter |
| AT4G26840 | SMALL UBIQUITIN-LIKE MODIFIER 1 (SL | Encodes a smai    | 4_13497201   | 3.04 | promoter          |
| AT4G11780 | TON1 RECRUITING MOTIF 10 (TRM10)    | unknown proteir   | 4_7088044    | 3.04 | exon              |
| AT2G47260 | WRKY DNA-BINDING PROTEIN 23 (WRK    | Encodes a merr    | 2_19408639   | 3.04 | proximal promoter |
| AT4G05410 | YAOZHE (YAO)                        | Encodes a nucl    | 4_2745757    | 3.04 | promoter          |
| AT1G69780 | (ATHB13)                            | Encodes a hom     | 1_26260869   | 3.03 | downstream        |
| AT1G18450 | ACTIN-RELATED PROTEIN 4 (ARP4)      | Encodes a gene    | 1_6348059    | 3.03 | promoter          |
| AT1G67730 | BETA-KETOACYL REDUCTASE 1 (KCR1     | Encodes one of    | 1_25393748   | 3.03 | downstream        |
| AT5G02110 | CYCLIN D7;1 (CYCD7;1)               | Encodes CYCL      | 5_416587     | 3.03 | promoter          |
| AT1G60660 | CYTOCHROME B5-LIKE PROTEIN (CB5L    | member of Cyto    | 1_22343653   | 3.03 | proximal promoter |
| AT3G56630 | CYTOCHROME P450, FAMILY 94, SUBF    | member of CYP     | 3_20978827   | 3.03 | promoter          |
| AT1G21910 | DEHYDRATION RESPONSE ELEMENT-E      | encodes a mem     | 1_7696350    | 3.03 | promoter          |
| AT4G00550 | DIGALACTOSYL DIACYLGLYCEROL DEI     | encodes a UDP     | 4_240620     | 3.03 | promoter          |
| AT5G24400 | EMBRYO DEFECTIVE 2024 (emb2024)     | Encodes a prot    | 5_8331899    | 3.03 | promoter          |
| AT5G53860 | EMBRYO DEFECTIVE 2737 (emb2737)     | A locus involv    | e 5_21865210 | 3.03 | promoter          |
| AT1G26120 | ISOPRENYLCYSTEINE METHYLESTERA      | Isoprenylcysteir  | 1_9030166    | 3.03 | intron            |
| AT5G06980 | na                                  | unknown proteir   | 5_2169949    | 3.03 | intergenic        |
| AT3G45420 | na                                  | Concanavalin A    | 3_16660248   | 3.03 | proximal promoter |
| AT1G34580 | na                                  | Major facilitator | 1_12659983   | 3.03 | proximal promoter |
| AT3G03680 | na                                  | C2 calcium/lipid  | 3_907476     | 3.03 | promoter          |
| AT4G17810 | na                                  | C2H2 and C2H1     | 4_9904563    | 3.03 | proximal promoter |
| AT5G38200 | na                                  | Class I glutamin  | 5_15256311   | 3.03 | five_prime_UTR    |
| AT5G51030 | na                                  | NAD(P)-binding    | 5_20749704   | 3.03 | promoter          |
| AT1G60670 | na                                  | Protein of unkn   | 1_22343653   | 3.03 | promoter          |
| AT2G27180 | na                                  | unknown proteir   | 2_11620853   | 3.03 | exon              |
| AT3G03847 | na                                  | SAUR-like auxir   | 3_982841     | 3.03 | promoter          |
| AT3G06700 | na                                  | Ribosomal L29     | e 3_2118015  | 3.03 | promoter          |
| AT3G08030 | na                                  | Protein of unkn   | 3_2564977    | 3.03 | intron            |
| AT3G61490 | na                                  | Pectin lyase-like | 3_22759094   | 3.03 | exon              |
| AT4G00560 | na                                  | NAD(P)-binding    | 4_240620     | 3.03 | downstream        |
| AT3G63095 | na                                  | Encodes a Prot    | 3_23316495   | 3.03 | intergenic        |
| AT4G10925 | na                                  | Nuclear transp    | 4_6704686    | 3.03 | promoter          |
| AT4G25980 | na                                  | Peroxidase sup    | 4_13190705   | 3.03 | intron            |
| AT4G31420 | na                                  | Zinc finger prote | 4_15247995   | 3.03 | promoter          |
| AT5G18980 | na                                  | ARM repeat sup    | 5_6337512    | 3.03 | exon              |
| AT5G19340 | na                                  | unknown proteir   | 5_6514985    | 3.03 | downstream        |
| AT5G66558 | na                                  | Potential natura  | 5_26567001   | 3.03 | promoter          |
| AT5G66560 | na                                  | Phototropic-res   | 5_26567001   | 3.03 | downstream        |
| AT1G52890 | NAC DOMAIN CONTAINING PROTEIN 15    | encodes a NAC     | 1_19698537   | 3.03 | promoter          |
| AT1G37130 | NITRATE REDUCTASE 2 (NIA2)          | Identified as a   | n 1_14163706 | 3.03 | intergenic        |
| AT5G65690 | PHOSPHOENOLPYRUVATE CARBOXYK        | Encodes a puta    | 5_26265014   | 3.03 | proximal promoter |
| AT1G67740 | PHOTOSYSTEM II BY (PSBY)            | PsbY precursor    | 1_25393748   | 3.03 | intergenic        |
| AT1G18080 | (ATARCA)                            | Encodes the Ar    | 1_6222052    | 3.02 | promoter          |
| AT1G62300 | (WRKY6)                             | Encodes a trans   | 1_23019384   | 3.02 | promoter          |
| AT4G09680 | CONSERVED TELOMERE MAINTENANC       | Encodes CTC1      | 4_6116655    | 3.02 | promoter          |
| AT5G44130 | FASCICLIN-LIKE ARABINOGALACTAN P    | FASCICLIN-like    | 5_17762119   | 3.02 | downstream        |
| AT5G23440 | FERREDOXIN/THIOREDOXIN REDUCTA      | ferredoxin/thiore | 5_7902213    | 3.02 | intergenic        |
| AT5G52210 | GTP-BINDING PROTEIN 1 (GB1)         | A member of Af    | 5_21204848   | 3.02 | promoter          |
| AT1G07430 | HIGHLY ABA-INDUCED PP2C GENE 2 (F   | highly ABA-indu   | 1_2280728    | 3.02 | downstream        |
| AT2G29640 | JOSEPHIN-LIKE PROTEIN (JOSL)        | JOSEPHIN-like     | 2_12670857   | 3.02 | promoter          |
| AT1G19850 | MONOPTEROS (MP)                     | Encodes a trans   | 1_6884704    | 3.02 | proximal promoter |
| AT1G12800 | na                                  | Nucleic acid-bin  | 1_4365448    | 3.02 | promoter          |
| AT1G35570 | na                                  | transposable el   | 1_13120948   | 3.02 | proximal promoter |
| AT1G76600 | na                                  | unknown proteir   | 1_28744553   | 3.02 | proximal promoter |
| AT3G06868 | na                                  | unknown proteir   | 3_2167620    | 3.02 | promoter          |
| AT3G06870 | na                                  | proline-rich fami | 3_2167620    | 3.02 | downstream        |
| AT5G24130 | na                                  | unknown proteir   | 5_8161512    | 3.02 | proximal promoter |
| AT2G40710 | na                                  | Haemolysin-III    | r 2_16980519 | 3.02 | intergenic        |
| AT5G47440 | na                                  | CONTAINS Inte     | 5_19245702   | 3.02 | promoter          |
| AT1G29420 | na                                  | SAUR-like auxir   | 1_10302151   | 3.02 | promoter          |
| AT1G66250 | na                                  | O-Glycosyl hydr   | 1_24693451   | 3.02 | intron            |

|           |                                     |                               |      |                   |
|-----------|-------------------------------------|-------------------------------|------|-------------------|
| AT1G04000 | na                                  | unknown proteir 1_1030726     | 3.02 | proximal promoter |
| AT1G78800 | na                                  | UDP-Glycosyltr: 1_29628008    | 3.02 | promoter          |
| AT3G44620 | na                                  | protein tyrosine 3_16193811   | 3.02 | promoter          |
| AT3G55485 | na                                  | na 3_20571361                 | 3.02 | promoter          |
| AT4G03500 | na                                  | Ankyrin repeat f 4_1553740    | 3.02 | intron            |
| AT5G19095 | na                                  | pre-tRNA; tRNA 5_6400843      | 3.02 | promoter          |
| AT5G44375 | na                                  | pre-tRNA; tRNA 5_17877638     | 3.02 | downstream        |
| AT5G04420 | na                                  | Galactose oxid: 5_1250018     | 3.02 | promoter          |
| AT5G06110 | na                                  | DnaJ domain ;Iv 5_1843882     | 3.02 | promoter          |
| AT5G18400 | na                                  | Cytokine-induce 5_6095044     | 3.02 | intron            |
| AT5G40945 | na                                  | pre-tRNA; tRNA 5_16410770     | 3.02 | downstream        |
| AT5G61170 | na                                  | Ribosomal prote 5_24611056    | 3.02 | promoter          |
| AT5G62760 | na                                  | P-loop containir 5_25209645   | 3.02 | promoter          |
| AT3G15500 | NAC DOMAIN CONTAINING PROTEIN 3     | Encodes an AT_3_5237595       | 3.02 | intergenic        |
| AT5G44370 | PHOSPHATE TRANSPORTER 4:6 (PHT4     | Encodes an ino 5_17877638     | 3.02 | promoter          |
| AT1G04010 | PHOSPHOLIPID STEROL ACYL TRANSF     | phospholipid ste 1_1030726    | 3.02 | intergenic        |
| AT3G02800 | PLANT AND FUNGI ATYPICAL DUAL-SPI   | Encodes an aty1_3_607860      | 3.02 | five_prime_UTR    |
| AT5G44140 | PROHIBITIN 7 (PHB7)                 | prohibitin 7 (PHI) 5_17762119 | 3.02 | promoter          |
| AT5G40950 | RIBOSOMAL PROTEIN LARGE SUBUNIT     | ribosomal protei 5_16410770   | 3.02 | promoter          |
| AT1G07420 | STEROL 4-ALPHA-METHYL-OXIDASE 2-    | Arabidopsis tha 1_2280728     | 3.02 | intergenic        |
| AT2G29630 | THIAMINC (THIC)                     | Encodes a prot 2_12670857     | 3.02 | intergenic        |
| AT5G67360 | (ARA12)                             | Encodes a subt 5_26874593     | 3.01 | promoter          |
| AT2G31970 | (RAD50)                             | Encodes the Ar: 2_13600371    | 3.01 | promoter          |
| AT3G54340 | APETALA 3 (AP3)                     | Floral homeotic 3_20121451    | 3.01 | promoter          |
| AT4G25960 | ATP-BINDING CASSETTE B2 (ABC2)      | P-glycoprotein 2_4_13176565   | 3.01 | proximal promoter |
| AT4G03080 | BRI1 SUPPRESSOR 1 (BSU1)-LIKE 1 (BS | BRI1 suppressor 4_1365502     | 3.01 | promoter          |
| AT1G55490 | CHAPERONIN 60 BETA (CPN60B)         | encodes the bei 1_20719292    | 3.01 | promoter          |
| AT3G22880 | DISRUPTION OF MEIOTIC CONTROL 1 (   | Expression of th 3_8100952    | 3.01 | promoter          |
| AT4G30850 | HEPTAHELICAL TRANSMEMBRANE PR       | heptahelical trar 4_15022588  | 3.01 | promoter          |
| AT3G21760 | HYPOSTATIN RESISTANCE 1 (HYR1)      | Encodes HYR1_3_7666707        | 3.01 | promoter          |
| AT3G53130 | LUTEIN DEFICIENT 1 (LUT1)           | Lutein-deficient 3_19692747   | 3.01 | promoter          |
| AT1G04630 | MATERNAL EFFECT EMBRYO ARREST       | maternal effect 1_1291148     | 3.01 | promoter          |
| AT3G26980 | MEMBRANE-ANCHORED UBIQUITIN-FO      | membrane-anch 3_9948024       | 3.01 | five_prime_UTR    |
| AT1G76140 | na                                  | Prolyl oligopepti 1_28571263  | 3.01 | exon              |
| AT2G22450 | na                                  | riboflavin biosyr 2_9530492   | 3.01 | promoter          |
| AT1G03570 | na                                  | pre-tRNA; tRNA 1_892517       | 3.01 | exon              |
| AT1G68710 | na                                  | ATPase E1-E2: 1_25799652      | 3.01 | proximal promoter |
| AT1G72790 | na                                  | hydroxyproline-1 1_27396479   | 3.01 | exon              |
| AT1G72800 | na                                  | RNA-binding (R 1_27396479     | 3.01 | proximal promoter |
| AT2G17970 | na                                  | 2-oxoglutarate ( 2_7821465    | 3.01 | promoter          |
| AT2G34340 | na                                  | Protein of unknc 2_14488112   | 3.01 | intergenic        |
| AT2G36410 | na                                  | Family of unkno 2_15280734    | 3.01 | downstream        |
| AT3G21755 | na                                  | Potential natura 3_7666707    | 3.01 | downstream        |
| AT3G26990 | na                                  | ENTH/VHS fam 3_9948024        | 3.01 | downstream        |
| AT5G16567 | na                                  | This gene encod 5_5417383     | 3.01 | proximal promoter |
| AT4G31490 | na                                  | Coatomer, beta 4_15268395     | 3.01 | promoter          |
| AT4G38781 | na                                  | unknown proteir 4_18111261    | 3.01 | promoter          |
| AT5G02050 | na                                  | Mitochondrial gl 5_404418     | 3.01 | promoter          |
| AT5G07980 | na                                  | dentin sialophos 5_2557888    | 3.01 | proximal promoter |
| AT5G22780 | na                                  | Adaptor protein 5_7598810     | 3.01 | proximal promoter |
| AT5G25920 | na                                  | BEST Arabidop: 5_9046593      | 3.01 | promoter          |
| AT5G28630 | na                                  | glycine-rich prot 5_10636538  | 3.01 | promoter          |
| AT5G39785 | na                                  | FUNCTIONS IN 5_15932093       | 3.01 | exon              |
| AT4G01550 | NAC DOMAIN CONTAINING PROTEIN 65    | Encodes a plasi 4_676451      | 3.01 | promoter          |
| AT5G22790 | RETICULATA-RELATED 1 (RER1)         | reticulata-relate 5_7598810   | 3.01 | intergenic        |
| AT4G12910 | SERINE CARBOXYPEPTIDASE-LIKE 20 (   | serine carboxyp 4_7553432     | 3.01 | promoter          |
| AT4G30960 | SOS3-INTERACTING PROTEIN 3 (SIP3)   | Encodes CBL-ir 4_15065668     | 3.01 | proximal promoter |
| AT5G65780 | (ATBCAT-5)                          | encodes a chlor 5_26316295    | 3    | five_prime_UTR    |
| AT4G31300 | (PBA1)                              | Encodes 20S pi 4_15188666     | 3    | promoter          |
| AT2G23600 | ACETONE-CYANOHYDRIN LYASE (ACL)     | Encodes a prot 2_10043844     | 3    | promoter          |
| AT2G46980 | ASYNAPTIC 3 (ASY3)                  | Encodes ASY3_2_19304350       | 3    | promoter          |
| AT3G55950 | CRINKLY4 RELATED 3 (CCR3)           | CRINKLY4 relat 3_20752761     | 3    | intergenic        |
| AT5G11530 | EMBRYONIC FLOWER 1 (EMF1)           | Involved in regu 5_3693608    | 3    | proximal promoter |
| AT3G26618 | EUKARYOTIC RELEASE FACTOR 1-3 (E    | eukaryotic relea 3_9788447    | 3    | promoter          |
| AT5G66510 | GAMMA CARBONIC ANHYDRASE 3 (GA      | Encodes mitoch 5_26551684     | 3    | promoter          |
| AT2G32700 | LEUNIG_HOMOLOG (LUH)                | Encodes a WD: 2_13866693      | 3    | promoter          |
| AT1G64660 | METHIONINE GAMMA-LYASE (MGL)        | Encodes a func 1_24029934     | 3    | intron            |
| AT2G23620 | METHYL ESTERASE 1 (MES1)            | Encodes a prot 2_10051761     | 3    | proximal promoter |
| AT2G38325 | MICRORNA390A (MIR390A)              | Encodes a micr 2_16059570     | 3    | proximal promoter |
| AT2G47350 | na                                  | HIT zinc finger ; 2_19433742  | 3    | promoter          |
| AT3G55410 | na                                  | 2-oxoglutarate c 3_20540982   | 3    | promoter          |
| AT4G32785 | na                                  | CONTAINS Inte 4_15811880      | 3    | downstream        |
| AT4G32790 | na                                  | Exostosin family 4_15811880   | 3    | promoter          |
| AT4G00560 | na                                  | NAD(P)-binding 4_242881       | 3    | proximal promoter |
| AT4G36150 | na                                  | Disease resist: 4_17104618    | 3    | promoter          |
| AT5G48760 | na                                  | Ribosomal prote 5_19772774    | 3    | promoter          |
| AT1G10220 | na                                  | BEST Arabidop: 1_3351867      | 3    | promoter          |
| AT1G16570 | na                                  | UDP-Glycosyltr: 1_5673658     | 3    | promoter          |
| AT1G22410 | na                                  | Class-II DAHP s 1_7911827     | 3    | promoter          |
| AT1G31760 | na                                  | SWIB/MDM2 dc 1_11373610       | 3    | promoter          |
| AT1G68340 | na                                  | Protein of unknc 1_25615523   | 3    | promoter          |
| AT1G72410 | na                                  | COP1-interactir 1_27257105    | 3    | promoter          |
| AT2G11890 | na                                  | adenylate cycl: 2_4802751     | 3    | promoter          |
| AT2G26800 | na                                  | Mutant has incr 2_11432712    | 3    | five_prime_UTR    |
| AT2G28710 | na                                  | C2H2-type zinc 2_12321619     | 3    | proximal promoter |
| AT2G37110 | na                                  | PLAC8 family pi 2_15592565    | 3    | five_prime_UTR    |
| AT1G55260 | na                                  | Bifunctional inhi 1_20616115  | 3    | exon              |
| AT1G55265 | na                                  | Protein of unknc 1_20616115   | 3    | proximal promoter |
| AT2G37100 | na                                  | protamine P1 fa 2_15592565    | 3    | intergenic        |
| AT2G37100 | na                                  | protamine P1 fa 2_15590463    | 3    | proximal promoter |
| AT2G44930 | na                                  | Plant protein of 2_18532047   | 3    | promoter          |
| AT3G48030 | na                                  | hypoxia-respon: 3_17728152    | 3    | promoter          |
| AT4G16105 | na                                  | pre-tRNA; tRNA 4_9108876      | 3    | intergenic        |
| AT4G31290 | na                                  | ChaC-like family 4_15188666   | 3    | downstream        |

|           |                                  |                   |            |   |                   |
|-----------|----------------------------------|-------------------|------------|---|-------------------|
| AT4G33180 | na                               | alpha/beta-Hydr   | 4_16000273 | 3 | five_prime_UTR    |
| AT5G11640 | na                               | Thioredoxin sup   | 5_3741904  | 3 | promoter          |
| AT5G08565 | na                               | Transcription ini | 5_2775811  | 3 | promoter          |
| AT5G11225 | na                               | pre-tRNA; tRNA    | 5_3578368  | 3 | promoter          |
| AT5G11630 | na                               | unknown proteir   | 5_3741904  | 3 | intron            |
| AT5G47740 | na                               | Adenine nucleoi   | 5_19337909 | 3 | proximal promoter |
| AT5G65240 | na                               | Leucine-rich re   | 5_26078300 | 3 | promoter          |
| AT4G00570 | NAD-DEPENDENT MALIC ENZYME 2 (N) | Encodes an NA     | 4_242881   | 3 | exon              |
| AT5G17770 | NADH:CYTOCHROME B5 REDUCTASE     | Encodes NADH      | 5_5866622  | 3 | five_prime_UTR    |
| AT1G70940 | PIN-FORMED 3 (PIN3)              | A regulator of ai | 1_26739782 | 3 | intergenic        |
| AT2G28550 | RELATED TO AP2.7 (RAP2.7)        | related to AP2.7  | 2_12225723 | 3 | downstream        |
| AT4G35480 | RING-H2 FINGER A3B (RHA3B)       | Encodes a puta    | 4_16852473 | 3 | exon              |
| AT2G39705 | ROTUNDIFOLIA LIKE 8 (RTFL8)      | ROTUNDIFOLIA      | 2_16555606 | 3 | proximal promoter |
| AT5G17240 | SET DOMAIN GROUP 40 (SDG40)      | SET domain grc    | 5_5666758  | 3 | promoter          |
| AT5G11190 | SHINE2 (SHN2)                    | encodes a mem     | 5_3563901  | 3 | proximal promoter |
| AT3G55120 | TRANSPARENT TESTA 5 (TT5)        | Catalyzes the c   | 3_20432388 | 3 | proximal promoter |
| AT1G70560 | TRYPTOPHAN AMINOTRANSFERASE      | O TAA1 is involve | 1_26603414 | 3 | proximal promoter |
| AT2G26580 | YABBY5 (YAB5)                    | YABBY5 (YAB5      | 2_11308318 | 3 | proximal promoter |
