# Supplementary material
Source: PubMed Central journal article supplement (PMC4390554)
Supplement: NIHMS672759-supplement-Table_S4.pdf [file NIHMS672759-supplement-Table_S4.pdf]

**Table S4. Enriched gene ontology (GO) terms of high-confidence SPCH targets**

Annotated number in query list: 1471 (high-confidence SPCH targets)

Annotated number in genome: 28352

\*: Ontology categories: P, biological process; F, molecular function; C, cellular function

| <b>GO term</b> | <b>Ontology*</b> | <b>Description</b>                       | <b>Number in c</b> |
|----------------|------------------|------------------------------------------|--------------------|
| GO:0050896     | P                | response to stimulus                     | 530                |
| GO:0010033     | P                | response to organic substance            | 298                |
| GO:0042221     | P                | response to chemical stimulus            | 373                |
| GO:0009628     | P                | response to abiotic stimulus             | 278                |
| GO:0009719     | P                | response to endogenous stimulus          | 201                |
| GO:0065007     | P                | biological regulation                    | 490                |
| GO:0009725     | P                | response to hormone stimulus             | 168                |
| GO:0050789     | P                | regulation of biological process         | 422                |
| GO:0009743     | P                | response to carbohydrate stimulus        | 112                |
| GO:0010200     | P                | response to chitin                       | 76                 |
| GO:0009737     | P                | response to abscisic acid stimulus       | 92                 |
| GO:0050794     | P                | regulation of cellular process           | 366                |
| GO:0009753     | P                | response to jasmonic acid stimulus       | 77                 |
| GO:0071495     | P                | cellular response to endogenous stimulus | 104                |
| GO:0006950     | P                | response to stress                       | 330                |
| GO:0009611     | P                | response to wounding                     | 61                 |
| GO:0070887     | P                | cellular response to chemical stimulus   | 147                |
| GO:0007242     | P                | intracellular signaling cascade          | 135                |
| GO:0009651     | P                | response to salt stress                  | 97                 |
| GO:0009605     | P                | response to external stimulus            | 122                |
| GO:0006970     | P                | response to osmotic stress               | 99                 |
| GO:0009987     | P                | cellular process                         | 889                |
| GO:0044283     | P                | small molecule biosynthetic process      | 174                |
| GO:0051716     | P                | cellular response to stimulus            | 205                |
| GO:0009416     | P                | response to light stimulus               | 125                |
| GO:0007165     | P                | signal transduction                      | 160                |
| GO:0023052     | P                | signaling                                | 207                |
| GO:0071310     | P                | cellular response to organic substance   | 128                |
| GO:0023046     | P                | signaling process                        | 165                |
| GO:0023060     | P                | signal transmission                      | 165                |
| GO:0009314     | P                | response to radiation                    | 128                |
| GO:0009755     | P                | hormone-mediated signaling pathway       | 77                 |
| GO:0032870     | P                | cellular response to hormone stimulus    | 80                 |
| GO:0009415     | P                | response to water                        | 60                 |
| GO:0023033     | P                | signaling pathway                        | 70                 |
| GO:0009414     | P                | response to water deprivation            | 59                 |
| GO:0009723     | P                | response to ethylene stimulus            | 54                 |
| GO:0019222     | P                | regulation of metabolic process          | 250                |

|            |   |                                                  |     |
|------------|---|--------------------------------------------------|-----|
| GO:0031323 | P | regulation of cellular metabolic process         | 234 |
| GO:0080090 | P | regulation of primary metabolic process          | 223 |
| GO:0048583 | P | regulation of response to stimulus               | 79  |
| GO:0031326 | P | regulation of cellular biosynthetic process      | 214 |
| GO:0009889 | P | regulation of biosynthetic process               | 214 |
| GO:0009733 | P | response to auxin stimulus                       | 59  |
| GO:0044238 | P | primary metabolic process                        | 729 |
| GO:0006575 | P | cellular amino acid derivative metabolic process | 81  |
| GO:0048731 | P | system development                               | 174 |
| GO:0048513 | P | organ development                                | 174 |
| GO:0009751 | P | response to salicylic acid stimulus              | 62  |
| GO:0023034 | P | intracellular signaling pathway                  | 59  |
| GO:0032502 | P | developmental process                            | 295 |
| GO:0006633 | P | fatty acid biosynthetic process                  | 46  |
| GO:0031347 | P | regulation of defense response                   | 65  |
| GO:0009867 | P | jasmonic acid mediated signaling pathway         | 44  |
| GO:0071395 | P | cellular response to jasmonic acid stimulus      | 44  |
| GO:0080134 | P | regulation of response to stress                 | 66  |
| GO:0009607 | P | response to biotic stimulus                      | 149 |
| GO:0006972 | P | hyperosmotic response                            | 40  |
| GO:0007275 | P | multicellular organismal development             | 277 |
| GO:0048367 | P | shoot development                                | 78  |
| GO:0048856 | P | anatomical structure development                 | 249 |
| GO:0044237 | P | cellular metabolic process                       | 709 |
| GO:0045087 | P | innate immune response                           | 93  |
| GO:0022621 | P | shoot system development                         | 78  |
| GO:0032501 | P | multicellular organismal process                 | 284 |
| GO:0010556 | P | regulation of macromolecule biosynthetic process | 197 |
| GO:0060255 | P | regulation of macromolecule metabolic process    | 217 |
| GO:0002376 | P | immune system process                            | 96  |
| GO:0006955 | P | immune response                                  | 96  |
| GO:0051252 | P | regulation of RNA metabolic process              | 190 |
| GO:0009058 | P | biosynthetic process                             | 513 |
| GO:0010468 | P | regulation of gene expression                    | 208 |
| GO:0051707 | P | response to other organism                       | 125 |
| GO:0031407 | P | oxylipin metabolic process                       | 31  |
| GO:0045088 | P | regulation of innate immune response             | 53  |
| GO:0009694 | P | jasmonic acid metabolic process                  | 30  |
| GO:0046394 | P | carboxylic acid biosynthetic process             | 105 |
| GO:0016053 | P | organic acid biosynthetic process                | 105 |
| GO:0009626 | P | plant-type hypersensitive response               | 52  |
| GO:0034050 | P | host programmed cell death induced by symbiont   | 52  |
| GO:0006355 | P | regulation of transcription, DNA-dependent       | 188 |

|            |   |                                                  |     |
|------------|---|--------------------------------------------------|-----|
| GO:0002682 | P | regulation of immune system process              | 53  |
| GO:0050776 | P | regulation of immune response                    | 53  |
| GO:0045449 | P | regulation of transcription                      | 188 |
| GO:0019219 | P | regulation of nucleobase, nucleoside, nucleoti   | 195 |
| GO:0010363 | P | regulation of plant-type hypersensitive respon   | 49  |
| GO:0043067 | P | regulation of programmed cell death              | 51  |
| GO:0051171 | P | regulation of nitrogen compound metabolic pro    | 195 |
| GO:0012501 | P | programmed cell death                            | 55  |
| GO:0010941 | P | regulation of cell death                         | 51  |
| GO:0080135 | P | regulation of cellular response to stress        | 49  |
| GO:0042398 | P | cellular amino acid derivative biosynthetic proc | 61  |
| GO:0006612 | P | protein targeting to membrane                    | 50  |
| GO:0006631 | P | fatty acid metabolic process                     | 65  |
| GO:0031408 | P | oxylipin biosynthetic process                    | 27  |
| GO:0009612 | P | response to mechanical stimulus                  | 18  |
| GO:0009266 | P | response to temperature stimulus                 | 91  |
| GO:0007623 | P | circadian rhythm                                 | 29  |
| GO:0048511 | P | rhythmic process                                 | 29  |
| GO:0009695 | P | jasmonic acid biosynthetic process               | 26  |
| GO:0008152 | P | metabolic process                                | 809 |
| GO:0033554 | P | cellular response to stress                      | 125 |
| GO:0044281 | P | small molecule metabolic process                 | 284 |
| GO:0009791 | P | post-embryonic development                       | 168 |
| GO:0034976 | P | response to endoplasmic reticulum stress         | 45  |
| GO:0008219 | P | cell death                                       | 56  |
| GO:0016265 | P | death                                            | 56  |
| GO:0010016 | P | shoot morphogenesis                              | 58  |
| GO:0042538 | P | hyperosmotic salinity response                   | 27  |
| GO:0044249 | P | cellular biosynthetic process                    | 488 |
| GO:0048364 | P | root development                                 | 60  |
| GO:0022622 | P | root system development                          | 60  |
| GO:0006519 | P | cellular amino acid and derivative metabolic pi  | 112 |
| GO:0006952 | P | defense response                                 | 132 |
| GO:0009617 | P | response to bacterium                            | 59  |
| GO:0009863 | P | salicylic acid mediated signaling pathway        | 43  |
| GO:0071446 | P | cellular response to salicylic acid stimulus     | 43  |
| GO:0042402 | P | cellular biogenic amine catabolic process        | 22  |
| GO:0006725 | P | cellular aromatic compound metabolic process     | 91  |
| GO:0051704 | P | multi-organism process                           | 140 |
| GO:0010817 | P | regulation of hormone levels                     | 50  |
| GO:0032787 | P | monocarboxylic acid metabolic process            | 121 |
| GO:0009698 | P | phenylpropanoid metabolic process                | 46  |
| GO:0043436 | P | oxoacid metabolic process                        | 160 |

|            |   |                                                  |     |
|------------|---|--------------------------------------------------|-----|
| GO:0019752 | P | carboxylic acid metabolic process                | 160 |
| GO:0006351 | P | transcription, DNA-dependent                     | 192 |
| GO:0006082 | P | organic acid metabolic process                   | 160 |
| GO:0009741 | P | response to brassinosteroid stimulus             | 21  |
| GO:0006350 | P | transcription                                    | 192 |
| GO:0032774 | P | RNA biosynthetic process                         | 192 |
| GO:0042180 | P | cellular ketone metabolic process                | 161 |
| GO:0009888 | P | tissue development                               | 88  |
| GO:0009310 | P | amine catabolic process                          | 30  |
| GO:0010374 | P | stomatal complex development                     | 30  |
| GO:0009409 | P | response to cold                                 | 61  |
| GO:0009738 | P | abscisic acid mediated signaling pathway         | 33  |
| GO:0006984 | P | ER-nuclear signaling pathway                     | 28  |
| GO:0009639 | P | response to red or far red light                 | 45  |
| GO:0071215 | P | cellular response to abscisic acid stimulus      | 34  |
| GO:0030968 | P | endoplasmic reticulum unfolded protein response  | 27  |
| GO:0006807 | P | nitrogen compound metabolic process              | 364 |
| GO:0006986 | P | response to unfolded protein                     | 27  |
| GO:0034620 | P | cellular response to unfolded protein            | 27  |
| GO:0007030 | P | Golgi organization                               | 26  |
| GO:0009620 | P | response to fungus                               | 51  |
| GO:0006066 | P | alcohol metabolic process                        | 95  |
| GO:0048585 | P | negative regulation of response to stimulus      | 40  |
| GO:0009627 | P | systemic acquired resistance                     | 47  |
| GO:0009913 | P | epidermal cell differentiation                   | 48  |
| GO:0071216 | P | cellular response to biotic stimulus             | 28  |
| GO:0010218 | P | response to far red light                        | 18  |
| GO:0000160 | P | two-component signal transduction system (pt     | 25  |
| GO:0008544 | P | epidermis development                            | 48  |
| GO:0007398 | P | ectoderm development                             | 48  |
| GO:0048466 | P | androecium development                           | 25  |
| GO:0048443 | P | stamen development                               | 25  |
| GO:0070838 | P | divalent metal ion transport                     | 27  |
| GO:0071445 | P | cellular response to protein stimulus            | 27  |
| GO:0000165 | P | MAPKKK cascade                                   | 28  |
| GO:0042219 | P | cellular amino acid derivative catabolic process | 22  |
| GO:0005975 | P | carbohydrate metabolic process                   | 163 |
| GO:0044282 | P | small molecule catabolic process                 | 80  |
| GO:0048366 | P | leaf development                                 | 46  |
| GO:0009699 | P | phenylpropanoid biosynthetic process             | 37  |
| GO:0048519 | P | negative regulation of biological process        | 98  |
| GO:0009862 | P | systemic acquired resistance, salicylic acid me  | 31  |
| GO:0048827 | P | phyllome development                             | 49  |

|            |   |                                            |     |
|------------|---|--------------------------------------------|-----|
| GO:0009641 | P | shade avoidance                            | 7   |
| GO:0009873 | P | ethylene mediated signaling pathway        | 20  |
| GO:0006576 | P | cellular biogenic amine metabolic process  | 25  |
| GO:0009814 | P | defense response, incompatible interaction | 52  |
| GO:0051179 | P | localization                               | 253 |
| GO:0006790 | P | sulfur metabolic process                   | 62  |
| GO:0065008 | P | regulation of biological quality           | 122 |
| GO:0046777 | P | protein amino acid autophosphorylation     | 21  |
| GO:0007243 | P | protein kinase cascade                     | 28  |
| GO:0031348 | P | negative regulation of defense response    | 32  |
| GO:0009825 | P | multidimensional cell growth               | 18  |
| GO:0002679 | P | respiratory burst during defense response  | 19  |
| GO:0071369 | P | cellular response to ethylene stimulus     | 21  |
| GO:0045730 | P | respiratory burst                          | 19  |
| GO:0044106 | P | cellular amine metabolic process           | 79  |
| GO:0006810 | P | transport                                  | 237 |
| GO:0010015 | P | root morphogenesis                         | 42  |
| GO:0009411 | P | response to UV                             | 29  |
| GO:0009308 | P | amine metabolic process                    | 84  |
| GO:0010103 | P | stomatal complex morphogenesis             | 21  |
| GO:0048767 | P | root hair elongation                       | 24  |
| GO:0008610 | P | lipid biosynthetic process                 | 91  |
| GO:0009642 | P | response to light intensity                | 31  |
| GO:0009850 | P | auxin metabolic process                    | 20  |
| GO:0048509 | P | regulation of meristem development         | 26  |
| GO:0009813 | P | flavonoid biosynthetic process             | 27  |
| GO:0009693 | P | ethylene biosynthetic process              | 19  |
| GO:0009692 | P | ethylene metabolic process                 | 19  |
| GO:0021700 | P | developmental maturation                   | 34  |
| GO:0010075 | P | regulation of meristem growth              | 22  |
| GO:0006833 | P | water transport                            | 21  |
| GO:0042044 | P | fluid transport                            | 21  |
| GO:0016052 | P | carbohydrate catabolic process             | 52  |
| GO:0043449 | P | cellular alkene metabolic process          | 19  |
| GO:0043450 | P | alkene biosynthetic process                | 19  |
| GO:0006520 | P | cellular amino acid metabolic process      | 73  |
| GO:0046700 | P | heterocycle catabolic process              | 30  |
| GO:0042445 | P | hormone metabolic process                  | 34  |
| GO:0051234 | P | establishment of localization              | 238 |
| GO:0032880 | P | regulation of protein localization         | 10  |
| GO:0019438 | P | aromatic compound biosynthetic process     | 59  |
| GO:0032879 | P | regulation of localization                 | 25  |
| GO:0009851 | P | auxin biosynthetic process                 | 18  |

|            |   |                                                   |     |
|------------|---|---------------------------------------------------|-----|
| GO:0009653 | P | anatomical structure morphogenesis                | 126 |
| GO:0042436 | P | indole derivative catabolic process               | 14  |
| GO:0043481 | P | anthocyanin accumulation in tissues in respon     | 17  |
| GO:0043480 | P | pigment accumulation in tissues                   | 17  |
| GO:0043473 | P | pigmentation                                      | 17  |
| GO:0000096 | P | sulfur amino acid metabolic process               | 44  |
| GO:0043476 | P | pigment accumulation                              | 17  |
| GO:0043478 | P | pigment accumulation in response to UV light      | 17  |
| GO:0043479 | P | pigment accumulation in tissues in response to    | 17  |
| GO:0019748 | P | secondary metabolic process                       | 95  |
| GO:0035266 | P | meristem growth                                   | 22  |
| GO:0006979 | P | response to oxidative stress                      | 52  |
| GO:0042434 | P | indole derivative metabolic process               | 20  |
| GO:0042430 | P | indole and derivative metabolic process           | 20  |
| GO:0009963 | P | positive regulation of flavonoid biosynthetic pro | 16  |
| GO:0009812 | P | flavonoid metabolic process                       | 28  |
| GO:0000038 | P | very-long-chain fatty acid metabolic process      | 11  |
| GO:0071489 | P | cellular response to red or far red light         | 10  |
| GO:0048507 | P | meristem development                              | 45  |
| GO:0010017 | P | red or far-red light signaling pathway            | 10  |
| GO:0044262 | P | cellular carbohydrate metabolic process           | 127 |
| GO:0006605 | P | protein targeting                                 | 73  |
| GO:0009965 | P | leaf morphogenesis                                | 35  |
| GO:0048469 | P | cell maturation                                   | 32  |
| GO:0048765 | P | root hair cell differentiation                    | 32  |
| GO:0048764 | P | trichoblast maturation                            | 32  |
| GO:0009074 | P | aromatic amino acid family catabolic process      | 14  |
| GO:0009063 | P | cellular amino acid catabolic process             | 22  |
| GO:0006629 | P | lipid metabolic process                           | 126 |
| GO:0051789 | P | response to protein stimulus                      | 37  |
| GO:0034641 | P | cellular nitrogen compound metabolic process      | 102 |
| GO:0009056 | P | catabolic process                                 | 150 |
| GO:0009684 | P | indoleacetic acid biosynthetic process            | 16  |
| GO:0008104 | P | protein localization                              | 92  |
| GO:0006598 | P | polyamine catabolic process                       | 9   |
| GO:0048589 | P | developmental growth                              | 63  |
| GO:0009683 | P | indoleacetic acid metabolic process               | 16  |
| GO:0009072 | P | aromatic amino acid family metabolic process      | 27  |
| GO:0048608 | P | reproductive structure development                | 120 |
| GO:0042335 | P | cuticle development                               | 10  |
| GO:0043069 | P | negative regulation of programmed cell death      | 21  |
| GO:0044248 | P | cellular catabolic process                        | 144 |
| GO:0009704 | P | de-etiolation                                     | 5   |

|            |   |                                                  |     |
|------------|---|--------------------------------------------------|-----|
| GO:0048523 | P | negative regulation of cellular process          | 62  |
| GO:0042446 | P | hormone biosynthetic process                     | 29  |
| GO:0006569 | P | tryptophan catabolic process                     | 13  |
| GO:0046218 | P | indolalkylamine catabolic process                | 13  |
| GO:0043170 | P | macromolecule metabolic process                  | 540 |
| GO:0009962 | P | regulation of flavonoid biosynthetic process     | 17  |
| GO:0071482 | P | cellular response to light stimulus              | 12  |
| GO:0071478 | P | cellular response to radiation                   | 12  |
| GO:0060548 | P | negative regulation of cell death                | 21  |
| GO:0006568 | P | tryptophan metabolic process                     | 15  |
| GO:0006586 | P | indolalkylamine metabolic process                | 15  |
| GO:0048878 | P | chemical homeostasis                             | 28  |
| GO:0040007 | P | growth                                           | 72  |
| GO:0010035 | P | response to inorganic substance                  | 82  |
| GO:0042435 | P | indole derivative biosynthetic process           | 18  |
| GO:0009646 | P | response to absence of light                     | 8   |
| GO:0010054 | P | trichoblast differentiation                      | 33  |
| GO:0051246 | P | regulation of protein metabolic process          | 25  |
| GO:0051865 | P | protein autoubiquitination                       | 5   |
| GO:0048528 | P | post-embryonic root development                  | 17  |
| GO:0050832 | P | defense response to fungus                       | 33  |
| GO:0016126 | P | sterol biosynthetic process                      | 20  |
| GO:0071555 | P | cell wall organization                           | 51  |
| GO:0055080 | P | cation homeostasis                               | 23  |
| GO:0044275 | P | cellular carbohydrate catabolic process          | 47  |
| GO:0019318 | P | hexose metabolic process                         | 51  |
| GO:0019439 | P | aromatic compound catabolic process              | 15  |
| GO:0048527 | P | lateral root development                         | 16  |
| GO:0048653 | P | anther development                               | 13  |
| GO:0010053 | P | root epidermal cell differentiation              | 33  |
| GO:0043401 | P | steroid hormone mediated signaling pathway       | 8   |
| GO:0009742 | P | brassinosteroid mediated signaling pathway       | 8   |
| GO:0048545 | P | response to steroid hormone stimulus             | 8   |
| GO:0071383 | P | cellular response to steroid hormone stimulus    | 8   |
| GO:0042743 | P | hydrogen peroxide metabolic process              | 32  |
| GO:0016051 | P | carbohydrate biosynthetic process                | 80  |
| GO:0030003 | P | cellular cation homeostasis                      | 20  |
| GO:0032268 | P | regulation of cellular protein metabolic process | 23  |
| GO:0034754 | P | cellular hormone metabolic process               | 20  |
| GO:0006816 | P | calcium ion transport                            | 16  |
| GO:0071367 | P | cellular response to brassinosteroid stimulus    | 8   |
| GO:0016125 | P | sterol metabolic process                         | 20  |
| GO:0034613 | P | cellular protein localization                    | 79  |

|            |   |                                                |      |
|------------|---|------------------------------------------------|------|
| GO:0015674 | P | di-, tri-valent inorganic cation transport     | 31   |
| GO:0019751 | P | polyol metabolic process                       | 17   |
| GO:0007166 | P | cell surface receptor linked signaling pathway | 19   |
| GO:0070727 | P | cellular macromolecule localization            | 81   |
| GO:0010310 | P | regulation of hydrogen peroxide metabolic pro  | 21   |
| GO:0044255 | P | cellular lipid metabolic process               | 99   |
| GO:0080010 | P | regulation of oxygen and reactive oxygen spec  | 21   |
| GO:0051239 | P | regulation of multicellular organismal process | 54   |
| GO:0007017 | P | microtubule-based process                      | 30   |
| GO:0006796 | P | phosphate metabolic process                    | 111  |
| GO:0009739 | P | response to gibberellin stimulus               | 19   |
| GO:0008356 | P | asymmetric cell division                       | 6    |
| GO:0006793 | P | phosphorus metabolic process                   | 111  |
| GO:0006800 | P | oxygen and reactive oxygen species metabolic   | 32   |
| GO:0042742 | P | defense response to bacterium                  | 34   |
| GO:0046907 | P | intracellular transport                        | 100  |
| GO:0009269 | P | response to desiccation                        | 8    |
| GO:0040008 | P | regulation of growth                           | 28   |
| GO:0046164 | P | alcohol catabolic process                      | 42   |
| GO:0006886 | P | intracellular protein transport                | 77   |
| GO:0030528 | F | transcription regulator activity               | 156  |
| GO:0003700 | F | transcription factor activity                  | 149  |
| GO:0003677 | F | DNA binding                                    | 188  |
| GO:0005515 | F | protein binding                                | 193  |
| GO:0044464 | C | cell part                                      | 1236 |
| GO:0005623 | C | cell                                           | 1236 |
| GO:0005634 | C | nucleus                                        | 583  |
| GO:0005886 | C | plasma membrane                                | 260  |
| GO:0030312 | C | external encapsulating structure               | 60   |
| GO:0005618 | C | cell wall                                      | 59   |
| GO:0009505 | C | plant-type cell wall                           | 33   |
| GO:0044459 | C | plasma membrane part                           | 86   |
| GO:0016020 | C | membrane                                       | 379  |



| Number in | p-value  | FDR      |
|-----------|----------|----------|
| 6237      | 8.40E-33 | 6.10E-29 |
| 2732      | 1.60E-32 | 6.10E-29 |
| 3936      | 9.80E-30 | 2.10E-26 |
| 2568      | 1.10E-29 | 2.10E-26 |
| 1595      | 1.70E-28 | 2.50E-25 |
| 6148      | 1.20E-23 | 1.40E-20 |
| 1356      | 4.30E-23 | 4.50E-20 |
| 5178      | 1.80E-21 | 1.70E-18 |
| 811       | 1.10E-18 | 9.20E-16 |
| 421       | 1.50E-18 | 1.10E-15 |
| 612       | 1.40E-17 | 9.60E-15 |
| 4547      | 1.90E-17 | 1.20E-14 |
| 471       | 1.20E-16 | 6.80E-14 |
| 800       | 8.00E-16 | 4.20E-13 |
| 4091      | 1.00E-15 | 5.20E-13 |
| 337       | 3.40E-15 | 1.60E-12 |
| 1395      | 9.40E-15 | 4.10E-12 |
| 1237      | 1.20E-14 | 4.80E-12 |
| 765       | 3.10E-14 | 1.20E-11 |
| 1083      | 3.30E-14 | 1.20E-11 |
| 815       | 1.80E-13 | 6.00E-11 |
| 14380     | 1.80E-13 | 6.00E-11 |
| 1854      | 3.80E-13 | 1.20E-10 |
| 2316      | 4.30E-13 | 1.30E-10 |
| 1171      | 5.00E-13 | 1.40E-10 |
| 1658      | 4.90E-13 | 1.40E-10 |
| 2353      | 5.50E-13 | 1.50E-10 |
| 1215      | 5.90E-13 | 1.60E-10 |
| 1755      | 1.50E-12 | 3.60E-10 |
| 1755      | 1.50E-12 | 3.60E-10 |
| 1246      | 2.90E-12 | 7.00E-10 |
| 587       | 3.30E-12 | 7.80E-10 |
| 627       | 4.40E-12 | 1.00E-09 |
| 399       | 6.50E-12 | 1.40E-09 |
| 515       | 7.80E-12 | 1.60E-09 |
| 391       | 8.60E-12 | 1.80E-09 |
| 352       | 3.80E-11 | 7.60E-09 |
| 3156      | 4.50E-11 | 8.90E-09 |

|       |          |          |
|-------|----------|----------|
| 2907  | 5.40E-11 | 1.00E-08 |
| 2741  | 6.90E-11 | 1.30E-08 |
| 660   | 9.90E-11 | 1.80E-08 |
| 2619  | 1.30E-10 | 2.20E-08 |
| 2622  | 1.40E-10 | 2.40E-08 |
| 426   | 1.80E-10 | 3.00E-08 |
| 11699 | 2.40E-10 | 4.00E-08 |
| 703   | 3.00E-10 | 4.70E-08 |
| 2028  | 3.10E-10 | 4.70E-08 |
| 2027  | 3.00E-10 | 4.70E-08 |
| 468   | 3.10E-10 | 4.70E-08 |
| 434   | 3.40E-10 | 5.10E-08 |
| 3983  | 5.50E-10 | 8.00E-08 |
| 301   | 1.20E-09 | 1.70E-07 |
| 524   | 1.30E-09 | 1.80E-07 |
| 282   | 1.50E-09 | 2.10E-07 |
| 282   | 1.50E-09 | 2.10E-07 |
| 540   | 1.60E-09 | 2.20E-07 |
| 1698  | 1.70E-09 | 2.20E-07 |
| 245   | 2.70E-09 | 3.40E-07 |
| 3757  | 3.30E-09 | 4.20E-07 |
| 709   | 4.20E-09 | 5.10E-07 |
| 3304  | 4.20E-09 | 5.10E-07 |
| 11501 | 4.70E-09 | 5.60E-07 |
| 914   | 4.90E-09 | 5.70E-07 |
| 712   | 5.00E-09 | 5.80E-07 |
| 3909  | 7.70E-09 | 8.60E-07 |
| 2487  | 7.70E-09 | 8.60E-07 |
| 2808  | 7.90E-09 | 8.70E-07 |
| 968   | 8.80E-09 | 9.40E-07 |
| 968   | 8.80E-09 | 9.40E-07 |
| 2386  | 1.00E-08 | 1.10E-06 |
| 7932  | 1.10E-08 | 1.20E-06 |
| 2678  | 1.20E-08 | 1.20E-06 |
| 1393  | 1.20E-08 | 1.20E-06 |
| 167   | 1.20E-08 | 1.20E-06 |
| 412   | 1.40E-08 | 1.40E-06 |
| 159   | 1.50E-08 | 1.50E-06 |
| 1108  | 1.50E-08 | 1.50E-06 |
| 1108  | 1.50E-08 | 1.50E-06 |
| 401   | 1.60E-08 | 1.50E-06 |
| 402   | 1.70E-08 | 1.60E-06 |
| 2373  | 1.80E-08 | 1.60E-06 |

|       |          |          |
|-------|----------|----------|
| 416   | 1.90E-08 | 1.70E-06 |
| 416   | 1.90E-08 | 1.70E-06 |
| 2377  | 2.00E-08 | 1.70E-06 |
| 2489  | 2.00E-08 | 1.80E-06 |
| 372   | 2.60E-08 | 2.20E-06 |
| 398   | 3.00E-08 | 2.60E-06 |
| 2505  | 3.10E-08 | 2.60E-06 |
| 449   | 3.50E-08 | 2.90E-06 |
| 403   | 4.30E-08 | 3.60E-06 |
| 380   | 4.70E-08 | 3.80E-06 |
| 530   | 4.90E-08 | 4.00E-06 |
| 394   | 5.40E-08 | 4.30E-06 |
| 585   | 5.90E-08 | 4.70E-06 |
| 141   | 6.00E-08 | 4.70E-06 |
| 63    | 6.30E-08 | 4.90E-06 |
| 943   | 6.80E-08 | 5.20E-06 |
| 163   | 8.00E-08 | 6.00E-06 |
| 163   | 8.00E-08 | 6.00E-06 |
| 135   | 9.50E-08 | 7.00E-06 |
| 13613 | 1.00E-07 | 7.40E-06 |
| 1454  | 1.10E-07 | 8.00E-06 |
| 4042  | 1.40E-07 | 1.00E-05 |
| 2139  | 1.90E-07 | 1.30E-05 |
| 353   | 2.20E-07 | 1.60E-05 |
| 495   | 2.90E-07 | 2.00E-05 |
| 495   | 2.90E-07 | 2.00E-05 |
| 524   | 3.40E-07 | 2.30E-05 |
| 158   | 4.50E-07 | 3.00E-05 |
| 7706  | 4.70E-07 | 3.10E-05 |
| 566   | 7.90E-07 | 5.30E-05 |
| 567   | 8.40E-07 | 5.50E-05 |
| 1318  | 8.70E-07 | 5.70E-05 |
| 1628  | 9.40E-07 | 6.10E-05 |
| 556   | 9.50E-07 | 6.10E-05 |
| 350   | 9.90E-07 | 6.30E-05 |
| 351   | 1.10E-06 | 6.70E-05 |
| 117   | 1.30E-06 | 8.00E-05 |
| 1015  | 1.30E-06 | 8.10E-05 |
| 1771  | 1.60E-06 | 9.70E-05 |
| 447   | 1.60E-06 | 0.0001   |
| 1476  | 1.70E-06 | 0.0001   |
| 396   | 1.70E-06 | 0.0001   |
| 2097  | 1.90E-06 | 0.00011  |

|      |          |         |
|------|----------|---------|
| 2097 | 1.90E-06 | 0.00011 |
| 2621 | 2.00E-06 | 0.00012 |
| 2099 | 2.00E-06 | 0.00012 |
| 111  | 2.00E-06 | 0.00012 |
| 2623 | 2.10E-06 | 0.00012 |
| 2624 | 2.10E-06 | 0.00012 |
| 2119 | 2.20E-06 | 0.00012 |
| 986  | 2.30E-06 | 0.00013 |
| 213  | 3.80E-06 | 0.00021 |
| 216  | 4.90E-06 | 0.00027 |
| 617  | 5.00E-06 | 0.00027 |
| 252  | 5.20E-06 | 0.00029 |
| 194  | 5.30E-06 | 0.00029 |
| 403  | 5.60E-06 | 0.0003  |
| 266  | 6.10E-06 | 0.00032 |
| 186  | 7.00E-06 | 0.00037 |
| 5657 | 7.40E-06 | 0.00039 |
| 188  | 8.40E-06 | 0.00043 |
| 188  | 8.40E-06 | 0.00043 |
| 178  | 9.30E-06 | 0.00048 |
| 494  | 1.00E-05 | 0.00052 |
| 1135 | 1.10E-05 | 0.00054 |
| 350  | 1.10E-05 | 0.00056 |
| 444  | 1.20E-05 | 0.00062 |
| 458  | 1.30E-05 | 0.00064 |
| 205  | 1.30E-05 | 0.00065 |
| 97   | 1.30E-05 | 0.00066 |
| 171  | 1.40E-05 | 0.00066 |
| 460  | 1.40E-05 | 0.00068 |
| 460  | 1.40E-05 | 0.00068 |
| 172  | 1.50E-05 | 0.0007  |
| 172  | 1.50E-05 | 0.0007  |
| 195  | 1.50E-05 | 0.00071 |
| 195  | 1.50E-05 | 0.00071 |
| 210  | 2.00E-05 | 0.00092 |
| 142  | 2.00E-05 | 0.00092 |
| 2245 | 2.00E-05 | 0.00093 |
| 932  | 2.40E-05 | 0.0011  |
| 444  | 2.50E-05 | 0.0011  |
| 325  | 2.50E-05 | 0.0011  |
| 1211 | 2.70E-05 | 0.0012  |
| 252  | 3.00E-05 | 0.0013  |
| 489  | 3.00E-05 | 0.0013  |

|      |          |        |
|------|----------|--------|
| 13   | 3.10E-05 | 0.0014 |
| 125  | 3.10E-05 | 0.0014 |
| 181  | 3.20E-05 | 0.0014 |
| 532  | 3.20E-05 | 0.0014 |
| 3810 | 4.00E-05 | 0.0017 |
| 681  | 4.20E-05 | 0.0018 |
| 1609 | 4.40E-05 | 0.0019 |
| 141  | 5.10E-05 | 0.0021 |
| 224  | 5.50E-05 | 0.0023 |
| 274  | 5.60E-05 | 0.0023 |
| 110  | 5.90E-05 | 0.0024 |
| 122  | 6.70E-05 | 0.0027 |
| 144  | 6.60E-05 | 0.0027 |
| 122  | 6.70E-05 | 0.0027 |
| 950  | 7.10E-05 | 0.0029 |
| 3566 | 7.00E-05 | 0.0029 |
| 413  | 8.10E-05 | 0.0032 |
| 244  | 9.20E-05 | 0.0037 |
| 1036 | 9.30E-05 | 0.0037 |
| 148  | 9.40E-05 | 0.0037 |
| 185  | 0.00011  | 0.0043 |
| 1152 | 0.00011  | 0.0044 |
| 273  | 0.00011  | 0.0045 |
| 140  | 0.00013  | 0.0049 |
| 212  | 0.00013  | 0.0051 |
| 225  | 0.00014  | 0.0053 |
| 130  | 0.00014  | 0.0054 |
| 130  | 0.00014  | 0.0054 |
| 316  | 0.00014  | 0.0054 |
| 165  | 0.00015  | 0.0055 |
| 154  | 0.00016  | 0.0058 |
| 154  | 0.00016  | 0.0058 |
| 571  | 0.00017  | 0.0062 |
| 132  | 0.00017  | 0.0062 |
| 132  | 0.00017  | 0.0062 |
| 886  | 0.00017  | 0.0062 |
| 267  | 0.00017  | 0.0063 |
| 320  | 0.00018  | 0.0064 |
| 3641 | 0.00018  | 0.0064 |
| 42   | 0.0002   | 0.007  |
| 679  | 0.0002   | 0.0071 |
| 206  | 0.0002   | 0.0072 |
| 123  | 0.00021  | 0.0073 |

|      |         |        |
|------|---------|--------|
| 1742 | 0.00021 | 0.0075 |
| 81   | 0.00023 | 0.0077 |
| 113  | 0.00023 | 0.0077 |
| 113  | 0.00023 | 0.0077 |
| 113  | 0.00023 | 0.0077 |
| 463  | 0.00022 | 0.0077 |
| 113  | 0.00023 | 0.0077 |
| 113  | 0.00023 | 0.0077 |
| 113  | 0.00023 | 0.0077 |
| 1242 | 0.00023 | 0.0077 |
| 171  | 0.00023 | 0.0077 |
| 580  | 0.00024 | 0.0079 |
| 148  | 0.00025 | 0.0081 |
| 148  | 0.00025 | 0.0081 |
| 103  | 0.00025 | 0.0083 |
| 248  | 0.00026 | 0.0086 |
| 53   | 0.00027 | 0.0088 |
| 44   | 0.00027 | 0.0088 |
| 482  | 0.00027 | 0.0088 |
| 44   | 0.00027 | 0.0088 |
| 1772 | 0.00028 | 0.0091 |
| 903  | 0.00028 | 0.0091 |
| 345  | 0.00032 | 0.01   |
| 305  | 0.00033 | 0.01   |
| 305  | 0.00033 | 0.01   |
| 305  | 0.00033 | 0.01   |
| 85   | 0.00035 | 0.011  |
| 177  | 0.00036 | 0.011  |
| 1767 | 0.00036 | 0.011  |
| 377  | 0.00039 | 0.012  |
| 1376 | 0.00039 | 0.012  |
| 2173 | 0.00039 | 0.012  |
| 108  | 0.0004  | 0.012  |
| 1216 | 0.0004  | 0.012  |
| 38   | 0.00042 | 0.013  |
| 762  | 0.00042 | 0.013  |
| 109  | 0.00044 | 0.013  |
| 245  | 0.00047 | 0.014  |
| 1682 | 0.00049 | 0.015  |
| 48   | 0.00049 | 0.015  |
| 171  | 0.00055 | 0.016  |
| 2091 | 0.00056 | 0.016  |
| 10   | 0.00057 | 0.017  |

|      |         |       |
|------|---------|-------|
| 756  | 0.00057 | 0.017 |
| 275  | 0.00057 | 0.017 |
| 79   | 0.00057 | 0.017 |
| 79   | 0.00057 | 0.017 |
| 9230 | 0.00057 | 0.017 |
| 124  | 0.0006  | 0.017 |
| 69   | 0.0006  | 0.017 |
| 69   | 0.0006  | 0.017 |
| 173  | 0.00063 | 0.018 |
| 102  | 0.00065 | 0.018 |
| 102  | 0.00065 | 0.018 |
| 265  | 0.00068 | 0.019 |
| 918  | 0.00068 | 0.019 |
| 1078 | 0.00071 | 0.02  |
| 139  | 0.00077 | 0.021 |
| 33   | 0.00077 | 0.021 |
| 336  | 0.00077 | 0.021 |
| 228  | 0.0008  | 0.022 |
| 11   | 0.0008  | 0.022 |
| 128  | 0.00082 | 0.022 |
| 338  | 0.00085 | 0.023 |
| 165  | 0.00085 | 0.023 |
| 602  | 0.00088 | 0.024 |
| 204  | 0.0009  | 0.024 |
| 543  | 0.00092 | 0.024 |
| 603  | 0.00091 | 0.024 |
| 106  | 0.00092 | 0.024 |
| 118  | 0.00095 | 0.025 |
| 84   | 0.00095 | 0.025 |
| 342  | 0.001   | 0.027 |
| 35   | 0.0011  | 0.027 |
| 35   | 0.0011  | 0.027 |
| 35   | 0.0011  | 0.027 |
| 35   | 0.0011  | 0.027 |
| 329  | 0.0011  | 0.027 |
| 1064 | 0.0011  | 0.028 |
| 169  | 0.0011  | 0.028 |
| 208  | 0.0011  | 0.029 |
| 170  | 0.0012  | 0.03  |
| 121  | 0.0012  | 0.031 |
| 36   | 0.0012  | 0.031 |
| 172  | 0.0014  | 0.034 |
| 1057 | 0.0014  | 0.035 |

|       |          |          |
|-------|----------|----------|
| 321   | 0.0014   | 0.035    |
| 135   | 0.0014   | 0.035    |
| 160   | 0.0014   | 0.035    |
| 1091  | 0.0014   | 0.036    |
| 187   | 0.0015   | 0.038    |
| 1390  | 0.0016   | 0.038    |
| 188   | 0.0016   | 0.04     |
| 668   | 0.0017   | 0.041    |
| 311   | 0.0017   | 0.041    |
| 1594  | 0.0017   | 0.041    |
| 163   | 0.0017   | 0.041    |
| 21    | 0.0017   | 0.041    |
| 1595  | 0.0017   | 0.041    |
| 342   | 0.0019   | 0.045    |
| 371   | 0.0019   | 0.045    |
| 1417  | 0.0019   | 0.046    |
| 39    | 0.0019   | 0.046    |
| 286   | 0.0019   | 0.046    |
| 491   | 0.002    | 0.048    |
| 1042  | 0.0021   | 0.049    |
| 1738  | 1.50E-10 | 1.70E-07 |
| 1680  | 8.90E-10 | 4.80E-07 |
| 2394  | 3.20E-08 | 1.20E-05 |
| 2618  | 1.30E-06 | 0.00034  |
| 22365 | 6.60E-07 | 0.00014  |
| 22365 | 6.60E-07 | 0.00014  |
| 9463  | 5.70E-07 | 0.00014  |
| 3727  | 9.60E-07 | 0.00015  |
| 614   | 8.30E-06 | 0.001    |
| 611   | 1.40E-05 | 0.0014   |
| 268   | 1.70E-05 | 0.0015   |
| 1065  | 8.80E-05 | 0.0062   |
| 6099  | 8.60E-05 | 0.0062   |
