# Supplementary material
Source: PubMed Central journal article supplement (PMC4390554)
Supplement: NIHMS672759-supplement-Table_S5.pdf [file NIHMS672759-supplement-Table_S5.pdf]

**Table S5. RNA-Seq analysis of inducible SPCH1-4A**

1: Genes are called differentially expressed (DE) with a false discovery rate (FDR) &lt; 0.05

2: Adjusted P-values: P-values were adjusted via the Benjamini &amp; Hochberg method, and

Hover over column headings with a red triangle for further details

| AGI       | Primary Gene Symbol      | DE_6h <sup>1</sup> | DE_8h <sup>1</sup> | log2(iSPCH/WT)_6h |
|-----------|--------------------------|--------------------|--------------------|-------------------|
| AT5G53210 | SPEECHLESS (SPCH)        | UP                 | UP                 | 8.32              |
| AT1G12845 | na                       | UP                 | UP                 | 3.86              |
| AT1G34245 | EPIDERMAL PATTERNING     | UP                 | UP                 | 3.54              |
| AT4G31805 | na                       | UP                 | UP                 | 1.79              |
| AT1G80080 | TOO MANY MOUTHS (TMM     | UP                 | UP                 | 3.30              |
| AT5G60880 | BREAKING OF ASYMMETR     | UP                 | UP                 | 1.18              |
| AT2G25460 | na                       | UP                 | UP                 | 2.20              |
| AT1G31935 | na                       | UP                 | UP                 | 1.15              |
| AT5G67020 | na                       | UP                 | UP                 | 1.60              |
| AT4G01060 | CAPRICE-LIKE MYB3 (CPL   | UP                 | UP                 | 1.96              |
| AT5G07280 | EXCESS MICROSPOROXY      | UP                 | UP                 | 1.63              |
| AT3G22760 | (SOL1)                   | UP                 | UP                 | 1.12              |
| AT3G14760 | na                       | UP                 | UP                 | 1.21              |
| AT3G62070 | na                       | UP                 | UP                 | 1.28              |
| AT1G26600 | CLAVATA3/ESR-RELATED     | UP                 | UP                 | 1.12              |
| AT5G62230 | ERECTA-LIKE 1 (ERL1)     | UP                 | UP                 | 0.83              |
| AT5G55120 | VITAMIN C DEFECTIVE 5 (V | UP                 | UP                 | 1.24              |
| AT3G47295 | na                       | UP                 | UP                 | 1.44              |
| AT1G14440 | HOMEODOMAIN PROTEIN 31 ( | UP                 | UP                 | 1.27              |
| AT5G16350 | na                       | UP                 | UP                 | 0.74              |
| AT3G14560 | na                       | UP                 | UP                 | 1.74              |
| AT4G35930 | F-BOX STRESS INDUCED     | UP                 | UP                 | 0.72              |
| AT5G11550 | na                       | UP                 | UP                 | 1.42              |
| AT4G23920 | UDP-D-GLUCOSE/UDP-D-C    | UP                 | UP                 | 0.59              |
| AT1G70890 | MLP-LIKE PROTEIN 43 (ML  | UP                 | UP                 | 0.43              |
| AT4G18950 | na                       | UP                 | UP                 | 1.06              |
| AT3G59900 | AUXIN-REGULATED GENE     | UP                 | UP                 | 1.23              |
| AT5G13220 | JASMONATE-ZIM-DOMAIN     | UP                 | UP                 | 1.13              |
| AT3G26744 | INDUCER OF CBF EXPRES    | UP                 | UP                 | 1.19              |
| AT2G03280 | na                       | UP                 | UP                 | 0.78              |
| AT3G55130 | ATP-BINDING CASSETTE (   | UP                 | UP                 | 1.11              |
| AT4G25260 | na                       | UP                 | UP                 | 0.66              |
| AT1G16370 | ORGANIC CATION/CARNIT    | UP                 | UP                 | 0.70              |
| AT1G12860 | SCREAM 2 (SCRM2)         | UP                 | UP                 | 0.77              |
| AT1G19550 | na                       | UP                 | UP                 | 0.78              |
| AT1G19570 | DEHYDROASCORBATE RE      | UP                 | UP                 | 0.63              |

|           |                         |        |        |       |
|-----------|-------------------------|--------|--------|-------|
| AT3G26210 | CYTOCHROME P450, FAMI   | UP     | UP     | 0.61  |
| AT4G25620 | na                      | UP     | UP     | 0.91  |
| AT5G07180 | ERECTA-LIKE 2 (ERL2)    | UP     | UP     | 0.54  |
| AT5G39580 | na                      | UP     | UP     | 0.66  |
| AT4G14680 | (APS3)                  | UP     | UP     | 0.50  |
| AT1G67940 | ATP-BINDING CASSETTE I  | UP     | UP     | 0.58  |
| AT2G19810 | OXIDATION-RELATED ZINC  | UP     | UP     | 0.77  |
| AT4G36670 | POLYOL/MONOSACCHARI     | UP     | UP     | 0.74  |
| AT4G37980 | ELICITOR-ACTIVATED GEN  | UP     | UP     | 0.42  |
| AT3G63450 | na                      | UP     | UP     | 0.84  |
| AT5G23860 | TUBULIN BETA 8 (TUB8)   | UP     | UP     | 0.43  |
| AT1G80160 | GLYOXYLASE I 7 (GLYI7)  | UP     | UP     | 1.69  |
| AT3G62820 | na                      | UP     | UP     | 0.90  |
| AT5G67260 | CYCLIN D3;2 (CYCD3;2)   | UP     | UP     | 0.65  |
| AT1G63010 | na                      | UP     | UP     | 0.39  |
| AT4G19030 | NOD26-LIKE MAJOR INTRII | UP     | UP     | 0.72  |
| AT4G25340 | FK506 BINDING PROTEIN   | UP     | UP     | 0.40  |
| AT5G13330 | RELATED TO AP2 6L (Rap2 | UP     | UP     | 0.67  |
| AT2G02130 | LOW-MOLECULAR-WEIGH     | UP     | UP     | 0.74  |
| AT2G44080 | ARGOS-LIKE (ARL)        | UP     | UP     | 0.54  |
| AT3G47800 | na                      | UP     | UP     | 0.44  |
| AT1G52930 | na                      | UP     | UP     | 0.49  |
| AT5G55920 | OLIGOCELLULA 2 (OLI2)   | UP     | UP     | 0.40  |
| AT3G20015 | na                      | UP     | UP     | 0.45  |
| AT1G08200 | UDP-D-APIOSE/UDP-D-XYL  | UP     | UP     | 0.46  |
| AT3G21720 | ISOCITRATE LYASE (ICL)  | UP     | UP     | 0.99  |
| AT4G14040 | SELENIUM-BINDING PROT   | UP     | UP     | 0.37  |
| AT3G18130 | RECEPTOR FOR ACTIVATI   | UP     | not DE | 0.53  |
| AT5G01600 | FERRETIN 1 (FER1)       | UP     | not DE | 0.62  |
| AT5G01595 | na                      | UP     | not DE | 0.61  |
| AT1G52070 | na                      | UP     | not DE | 0.47  |
| AT4G12720 | (NUDT7)                 | UP     | not DE | 0.62  |
| AT1G52060 | na                      | UP     | not DE | 0.40  |
| AT1G19900 | na                      | UP     | not DE | 0.55  |
| AT2G42850 | CYTOCHROME P450, FAMI   | UP     | not DE | 0.85  |
| AT5G46900 | na                      | UP     | DOWN   | 0.44  |
| AT1G67270 | na                      | not DE | UP     | -1.17 |
| AT5G24110 | WRKY DNA-BINDING PRO    | not DE | UP     | 1.83  |
| AT4G31970 | CYTOCHROME P450, FAMI   | not DE | UP     | -0.03 |
| AT5G57010 | na                      | not DE | UP     | 0.50  |
| AT1G26420 | na                      | not DE | UP     | 0.19  |
| AT1G36622 | na                      | not DE | UP     | 0.00  |

|           |                          |        |    |       |
|-----------|--------------------------|--------|----|-------|
| AT2G40670 | RESPONSE REGULATOR 1     | not DE | UP | 0.40  |
| AT5G64905 | ELICITOR PEPTIDE 3 PREC  | not DE | UP | -0.77 |
| AT2G25625 | na                       | not DE | UP | -0.24 |
| AT2G43620 | na                       | not DE | UP | -0.04 |
| AT3G09400 | POL-LIKE 3 (PLL3)        | not DE | UP | -1.03 |
| AT1G36640 | na                       | not DE | UP | -0.37 |
| AT1G13520 | na                       | not DE | UP | -0.54 |
| AT2G29460 | GLUTATHIONE S-TRANSFI    | not DE | UP | 0.28  |
| AT5G40590 | na                       | not DE | UP | -0.39 |
| AT2G27389 | na                       | not DE | UP | 0.02  |
| AT2G27390 | na                       | not DE | UP | -0.07 |
| AT1G53625 | na                       | not DE | UP | 0.02  |
| AT3G63380 | na                       | not DE | UP | 0.50  |
| AT1G14540 | PEROXIDASE 4 (PER4)      | not DE | UP | -0.51 |
| AT2G37430 | na                       | not DE | UP | -0.58 |
| AT2G19190 | FLG22-INDUCED RECEPT     | not DE | UP | -0.10 |
| AT2G18690 | na                       | not DE | UP | 0.67  |
| AT1G18970 | GERMIN-LIKE PROTEIN 4 (  | not DE | UP | -0.15 |
| AT2G46495 | na                       | not DE | UP | -0.49 |
| AT4G29020 | na                       | not DE | UP | 0.50  |
| AT2G43570 | CHITINASE, PUTATIVE (CH  | not DE | UP | -0.28 |
| AT3G48580 | XYLOGLUCAN ENDOTRAN      | not DE | UP | 0.18  |
| AT4G08555 | na                       | not DE | UP | 0.34  |
| AT4G23190 | CYSTEINE-RICH RLK (REC   | not DE | UP | 0.31  |
| AT1G52910 | na                       | not DE | UP | 0.53  |
| AT3G09730 | na                       | not DE | UP | 0.83  |
| AT1G19020 | na                       | not DE | UP | 0.34  |
| AT1G30730 | na                       | not DE | UP | 0.05  |
| AT1G78340 | GLUTATHIONE S-TRANSFI    | not DE | UP | 0.37  |
| AT5G49480 | CA2+-BINDING PROTEIN 1   | not DE | UP | -0.06 |
| AT5G12340 | na                       | not DE | UP | -0.47 |
| AT5G07390 | RESPIRATORY BURST OX     | not DE | UP | -0.39 |
| AT3G49845 | WINDHOSE 3 (WIH3)        | not DE | UP | -0.29 |
| AT2G43550 | na                       | not DE | UP | 0.22  |
| AT3G02240 | ROOT MERISTEM GROWT      | not DE | UP | 0.13  |
| AT1G71140 | na                       | not DE | UP | 0.04  |
| AT5G59520 | ZRT/IRT-LIKE PROTEIN 2 ( | not DE | UP | -0.08 |
| AT2G15480 | UDP-GLUCOSYL TRANSFE     | not DE | UP | 0.32  |
| AT5G22140 | na                       | not DE | UP | 0.05  |
| AT4G04990 | na                       | not DE | UP | -0.37 |
| AT3G01420 | (DOX1)                   | not DE | UP | -0.29 |
| AT2G15490 | UDP-GLYCOSYLTRANSFEI     | not DE | UP | 0.39  |

|           |                          |        |    |       |
|-----------|--------------------------|--------|----|-------|
| AT1G74360 | na                       | not DE | UP | 0.26  |
| AT5G25930 | na                       | not DE | UP | 0.15  |
| AT2G42060 | na                       | not DE | UP | -0.56 |
| AT5G06740 | na                       | not DE | UP | 0.04  |
| AT3G09270 | GLUTATHIONE S-TRANSFI    | not DE | UP | 0.21  |
| AT1G74590 | GLUTATHIONE S-TRANSFI    | not DE | UP | -0.01 |
| AT1G67810 | SULFUR E2 (SUFE2)        | not DE | UP | 0.13  |
| AT1G11340 | na                       | not DE | UP | 0.18  |
| AT1G12420 | ACT DOMAIN REPEAT 8 (A   | not DE | UP | 0.66  |
| AT4G23810 | (WRKY53)                 | not DE | UP | 0.24  |
| AT3G22060 | na                       | not DE | UP | 0.37  |
| AT5G19240 | na                       | not DE | UP | -0.14 |
| AT4G10910 | na                       | not DE | UP | 0.20  |
| AT3G52748 | na                       | not DE | UP | -0.32 |
| AT1G55740 | SEED IMBIBITION 1 (SIP1) | not DE | UP | 0.30  |
| AT4G14400 | ACCELERATED CELL DEA     | not DE | UP | -0.08 |
| AT5G48540 | na                       | not DE | UP | 0.03  |
| AT3G13610 | na                       | not DE | UP | -0.38 |
| AT4G37900 | na                       | not DE | UP | -0.06 |
| AT4G14770 | TESMIN/TSO1-LIKE CXC 2   | not DE | UP | 0.30  |
| AT2G39650 | na                       | not DE | UP | -0.17 |
| AT4G22070 | WRKY DNA-BINDING PRO     | not DE | UP | -0.51 |
| AT5G48400 | (ATGLR1.2)               | not DE | UP | -0.28 |
| AT1G51890 | na                       | not DE | UP | 0.22  |
| AT4G22530 | na                       | not DE | UP | -0.17 |
| AT1G17180 | GLUTATHIONE S-TRANSFI    | not DE | UP | 0.17  |
| AT3G14620 | CYTOCHROME P450, FAM     | not DE | UP | 0.01  |
| AT1G30700 | na                       | not DE | UP | -0.29 |
| AT3G50900 | na                       | not DE | UP | -0.03 |
| AT3G54740 | na                       | not DE | UP | 0.57  |
| AT1G32940 | (SBT3.5)                 | not DE | UP | -0.01 |
| AT3G54420 | HOMOLOG OF CARROT EF     | not DE | UP | -0.07 |
| AT4G28490 | HAESA (HAE)              | not DE | UP | 0.42  |
| AT2G31010 | na                       | not DE | UP | 0.12  |
| AT1G61360 | na                       | not DE | UP | 0.09  |
| AT4G18940 | na                       | not DE | UP | 0.15  |
| AT1G17170 | GLUTATHIONE S-TRANSFI    | not DE | UP | 0.02  |
| AT1G32540 | LSD ONE LIKE 1 (LOL1)    | not DE | UP | 0.38  |
| AT5G24090 | CHITINASE A (CHIA)       | not DE | UP | -0.03 |
| AT4G18970 | na                       | not DE | UP | 0.03  |
| AT1G21010 | na                       | not DE | UP | 0.12  |
| AT3G22104 | na                       | not DE | UP | 0.30  |

|           |                        |        |    |       |
|-----------|------------------------|--------|----|-------|
| AT1G51800 | IMPAIRED OOMYCETE SU   | not DE | UP | 0.40  |
| AT1G64400 | LONG-CHAIN ACYL-COA S  | not DE | UP | -0.18 |
| AT1G55450 | na                     | not DE | UP | 0.12  |
| AT2G27385 | na                     | not DE | UP | 0.21  |
| AT1G65690 | na                     | not DE | UP | -0.03 |
| AT5G59530 | na                     | not DE | UP | 0.15  |
| AT4G20860 | na                     | not DE | UP | 0.05  |
| AT4G08850 | na                     | not DE | UP | 0.12  |
| AT2G46750 | L -GULONO-1,4-LACTONE  | not DE | UP | -0.24 |
| AT1G66160 | CYS, MET, PRO, AND GLY | not DE | UP | 0.41  |
| AT1G60730 | na                     | not DE | UP | 0.17  |
| AT2G46430 | CYCLIC NUCLEOTIDE GAT  | not DE | UP | -0.14 |
| AT2G39380 | EXOCYST SUBUNIT EXO7(  | not DE | UP | 0.13  |
| AT3G44300 | NITRILASE 2 (NIT2)     | not DE | UP | 0.14  |
| AT1G76680 | 12-OXOPHYTODIENOATE    | not DE | UP | 0.29  |
| AT2G33710 | na                     | not DE | UP | 0.06  |
| AT4G34131 | UDP-GLUCOSYL TRANSFE   | not DE | UP | 0.09  |
| AT5G44580 | na                     | not DE | UP | 0.22  |
| AT1G61560 | MILDEW RESISTANCE LOC  | not DE | UP | -0.01 |
| AT3G53150 | UDP-GLUCOSYL TRANSFE   | not DE | UP | -0.04 |
| AT1G51420 | SUCROSE-PHOSPHATASE    | not DE | UP | 0.13  |
| AT5G54840 | (SGP1)                 | not DE | UP | 0.05  |
| AT1G14870 | PLANT CADMIUM RESISTA  | not DE | UP | -0.03 |
| AT5G27120 | na                     | not DE | UP | 0.30  |
| AT3G06740 | GATA TRANSCRIPTION FA  | not DE | UP | 0.01  |
| AT1G02520 | ATP-BINDING CASSETTE E | not DE | UP | -0.04 |
| AT3G52450 | PLANT U-BOX 22 (PUB22) | not DE | UP | 0.31  |
| AT1G04770 | na                     | not DE | UP | -0.38 |
| AT5G12880 | na                     | not DE | UP | -0.26 |
| AT4G37010 | CENTRIN 2 (CEN2)       | not DE | UP | 0.01  |
| AT5G43580 | UNUSUAL SERINE PROTE,  | not DE | UP | 0.09  |
| AT2G26820 | PHLOEM PROTEIN 2-A3 (P | not DE | UP | -0.31 |
| AT2G26530 | (AR781)                | not DE | UP | -0.19 |
| AT1G52200 | na                     | not DE | UP | 0.18  |
| AT2G34260 | HUMAN WDR55 (WD40 RE   | not DE | UP | 0.18  |
| AT1G17190 | GLUTATHIONE S-TRANSFI  | not DE | UP | 0.40  |
| AT3G10500 | NAC DOMAIN CONTAININC  | not DE | UP | 0.09  |
| AT2G46740 | L -GULONO-1,4-LACTONE  | not DE | UP | 0.00  |
| AT2G41475 | na                     | not DE | UP | 0.02  |
| AT2G39870 | na                     | not DE | UP | 0.22  |
| AT2G34500 | CYTOCHROME P450, FAMI  | not DE | UP | 0.07  |
| AT2G43110 | na                     | not DE | UP | 0.41  |

|           |                         |        |    |       |
|-----------|-------------------------|--------|----|-------|
| AT1G49310 | na                      | not DE | UP | 0.23  |
| AT5G44910 | na                      | not DE | UP | 0.19  |
| AT4G37310 | CYTOCHROME P450, FAMI   | not DE | UP | -0.41 |
| AT3G54400 | na                      | not DE | UP | 0.13  |
| AT3G19010 | na                      | not DE | UP | 0.07  |
| AT2G24180 | CYTOCHROME P450 71B6    | not DE | UP | 0.02  |
| AT1G55920 | SERINE ACETYLTRANSFE    | not DE | UP | 0.25  |
| AT4G18360 | na                      | not DE | UP | -0.02 |
| AT4G37070 | (PLP1)                  | not DE | UP | -0.15 |
| AT3G53480 | ATP-BINDING CASSETTE (  | not DE | UP | 0.16  |
| AT1G51790 | na                      | not DE | UP | 0.08  |
| AT4G13180 | na                      | not DE | UP | 0.19  |
| AT4G21990 | APS REDUCTASE 3 (APR3)  | not DE | UP | -0.11 |
| AT5G24380 | YELLOW STRIPE LIKE 2 (Y | not DE | UP | -0.28 |
| AT2G47000 | ATP-BINDING CASSETTE E  | not DE | UP | 0.14  |
| AT1G18980 | na                      | not DE | UP | -0.08 |
| AT1G62300 | (WRKY6)                 | not DE | UP | -0.06 |
| AT3G21540 | na                      | not DE | UP | 0.22  |
| AT4G25100 | FE SUPEROXIDE DISMUTA   | not DE | UP | 0.18  |
| AT3G29034 | na                      | not DE | UP | -0.14 |
| AT4G25900 | na                      | not DE | UP | -0.12 |
| AT3G18600 | na                      | not DE | UP | 0.34  |
| AT3G57940 | na                      | not DE | UP | 0.24  |
| AT4G26780 | (AR192)                 | not DE | UP | 0.12  |
| AT5G59680 | na                      | not DE | UP | -0.04 |
| AT5G50200 | WOUND-RESPONSIVE 3 (V   | not DE | UP | -0.09 |
| AT2G17500 | na                      | not DE | UP | -0.13 |
| AT1G78000 | SULFATE TRANSPORTER     | not DE | UP | -0.06 |
| AT4G25630 | FIBRILLARIN 2 (FIB2)    | not DE | UP | 0.37  |
| AT3G13230 | na                      | not DE | UP | 0.35  |
| AT3G12700 | na                      | not DE | UP | -0.54 |
| AT1G80640 | na                      | not DE | UP | 0.17  |
| AT4G23550 | (WRKY29)                | not DE | UP | -0.37 |
| AT1G18390 | na                      | not DE | UP | 0.05  |
| AT1G13360 | na                      | not DE | UP | 0.19  |
| AT1G56110 | HOMOLOG OF NUCLEOLA     | not DE | UP | 0.30  |
| AT2G34510 | na                      | not DE | UP | -0.15 |
| AT2G38940 | PHOSPHATE TRANSPORT     | not DE | UP | 0.29  |
| AT3G49780 | PHYTOSULFOKINE 4 PREC   | not DE | UP | 0.08  |
| AT5G57280 | ROOT INITIATION DEFECT  | not DE | UP | 0.17  |
| AT1G17860 | na                      | not DE | UP | -0.09 |
| AT5G19230 | na                      | not DE | UP | 0.03  |

|           |                             |        |      |       |
|-----------|-----------------------------|--------|------|-------|
| AT1G05340 | na                          | not DE | UP   | -0.21 |
| AT2G28900 | OUTER PLASTID ENVELOPE      | not DE | UP   | -0.09 |
| AT1G66200 | GLUTAMINE SYNTHASE C        | not DE | UP   | -0.10 |
| AT5G63600 | FLAVONOL SYNTHASE 5 (L)     | not DE | UP   | -0.06 |
| AT3G16810 | PUMILIO 24 (PUM24)          | not DE | UP   | 0.20  |
| AT2G29420 | GLUTATHIONE S-TRANSFERASE   | not DE | UP   | 0.09  |
| AT3G47780 | ATP-BINDING CASSETTE 7      | not DE | UP   | -0.28 |
| AT4G36500 | na                          | not DE | UP   | -0.30 |
| AT1G65970 | THIOREDOXIN-DEPENDENT       | not DE | UP   | 0.26  |
| AT1G18800 | NAP1-RELATED PROTEIN 1      | not DE | UP   | 0.07  |
| AT4G11600 | GLUTATHIONE PEROXIDASE      | not DE | UP   | 0.02  |
| AT1G78380 | GLUTATHIONE S-TRANSFERASE   | not DE | UP   | 0.10  |
| AT4G01560 | MATERNAL EFFECT EMBRYO      | not DE | UP   | 0.37  |
| AT1G13930 | na                          | not DE | UP   | -0.39 |
| AT1G31660 | na                          | not DE | UP   | 0.23  |
| AT3G09440 | na                          | not DE | UP   | 0.14  |
| AT5G20160 | na                          | not DE | UP   | 0.27  |
| AT1G66580 | SENESCENCE ASSOCIATE        | not DE | UP   | 0.19  |
| AT4G13850 | GLYCINE-RICH RNA-BINDING    | not DE | UP   | 0.16  |
| AT2G21660 | GLYCINE-RICH RNA-BINDING    | not DE | UP   | -0.05 |
| AT1G48570 | na                          | not DE | UP   | 0.32  |
| AT3G23620 | na                          | not DE | UP   | 0.23  |
| AT1G48920 | NUCLEOLIN LIKE 1 (NUC-L)    | not DE | UP   | 0.14  |
| AT5G59860 | na                          | not DE | UP   | 0.31  |
| AT3G24300 | AMMONIUM TRANSPORTER        | not DE | UP   | 0.20  |
| AT2G44490 | PENETRATION 2 (PEN2)        | not DE | UP   | -0.07 |
| AT2G24120 | SCABRA 3 (SCA3)             | not DE | UP   | 0.35  |
| AT4G25730 | na                          | not DE | UP   | 0.20  |
| AT3G16400 | NITRILE SPECIFIER PROTEIN   | not DE | UP   | -0.19 |
| AT1G74560 | NAP1-RELATED PROTEIN 1      | not DE | UP   | 0.05  |
| AT3G16410 | NITRILE SPECIFIER PROTEIN   | not DE | UP   | -0.17 |
| AT5G08610 | PIGMENT DEFECTIVE 340       | not DE | UP   | 0.24  |
| AT3G51380 | IQ-DOMAIN 20 (IQD20)        | not DE | DOWN | 1.88  |
| AT1G30850 | ROOT HAIR SPECIFIC 4 (RHS4) | not DE | DOWN | -1.33 |
| AT3G12540 | na                          | not DE | DOWN | -1.64 |
| AT1G06923 | na                          | not DE | DOWN | -1.78 |
| AT1G66150 | TRANSMEMBRANE KINASE        | not DE | DOWN | -0.24 |
| AT5G57660 | CONSTANS-LIKE 5 (COL5)      | not DE | DOWN | -0.23 |
| AT2G40000 | ORTHOLOG OF SUGAR BEET      | not DE | DOWN | -0.07 |
| AT3G13750 | BETA GALACTOSIDASE 1 (BGL1) | not DE | DOWN | -0.16 |
| AT1G61100 | na                          | not DE | DOWN | -0.24 |
| AT4G37610 | BTB AND TAZ DOMAIN PROTEIN  | not DE | DOWN | -0.09 |

|           |                            |        |      |       |
|-----------|----------------------------|--------|------|-------|
| AT2G26910 | ATP-BINDING CASSETTE C     | not DE | DOWN | -0.25 |
| AT3G29240 | na                         | not DE | DOWN | -0.12 |
| AT5G64170 | na                         | not DE | DOWN | -0.09 |
| AT5G49360 | BETA-XYLOSIDASE 1 (BXL     | not DE | DOWN | -0.13 |
| AT2G37130 | na                         | not DE | DOWN | 0.23  |
| AT4G36850 | na                         | not DE | DOWN | -0.24 |
| AT3G13310 | na                         | not DE | DOWN | 0.16  |
| AT5G04140 | GLUTAMATE SYNTHASE 1       | not DE | DOWN | -0.15 |
| AT5G06980 | na                         | not DE | DOWN | -0.32 |
| AT1G58290 | (HEMA1)                    | not DE | DOWN | 0.04  |
| AT2G44140 | na                         | not DE | DOWN | 0.02  |
| AT4G34350 | 4-HYDROXY-3-METHYLBU       | not DE | DOWN | -0.09 |
| AT3G59060 | PHYTOCHROME INTERAC        | not DE | DOWN | -0.30 |
| AT1G17360 | na                         | not DE | DOWN | -0.34 |
| AT3G10420 | SEEDLING PLASTID DEVE      | not DE | DOWN | -0.13 |
| AT5G39530 | na                         | not DE | DOWN | -0.23 |
| AT1G18460 | na                         | not DE | DOWN | -0.22 |
| AT3G13040 | na                         | not DE | DOWN | -0.07 |
| AT5G64840 | ATP-BINDING CASSETTE F     | not DE | DOWN | -0.27 |
| AT1G49730 | na                         | not DE | DOWN | -0.40 |
| AT5G57800 | ECERIFERUM 3 (CER3)        | not DE | DOWN | -0.27 |
| AT1G21060 | na                         | not DE | DOWN | -0.54 |
| AT5G46890 | na                         | not DE | DOWN | 0.43  |
| AT2G37170 | PLASMA MEMBRANE INTR       | not DE | DOWN | -0.05 |
| AT5G18670 | BETA-AMYLASE 3 (BMY3)      | not DE | DOWN | -0.06 |
| AT3G57040 | RESPONSE REGULATOR $\zeta$ | not DE | DOWN | -0.37 |
| AT2G37180 | RESPONSIVE TO DESICCA      | not DE | DOWN | 0.00  |
| AT5G20230 | BLUE-COPPER-BINDING P      | not DE | DOWN | 0.37  |
| AT1G23030 | na                         | not DE | DOWN | -0.32 |
| AT1G01060 | LATE ELONGATED HYPOC       | not DE | DOWN | -0.01 |
| AT2G44130 | na                         | not DE | DOWN | -0.01 |
| AT5G13630 | GENOMES UNCOUPLED 5        | not DE | DOWN | -0.23 |
| AT3G54500 | na                         | not DE | DOWN | -0.19 |
| AT1G02640 | BETA-XYLOSIDASE 2 (BXL     | not DE | DOWN | -0.16 |
| AT5G03230 | na                         | not DE | DOWN | -0.19 |
| AT3G03520 | NON-SPECIFIC PHOSPHOI      | not DE | DOWN | -0.03 |
| AT5G43150 | na                         | not DE | DOWN | 0.03  |
| AT1G66270 | (BGLU21)                   | not DE | DOWN | -0.01 |
| AT1G63300 | na                         | not DE | DOWN | -0.18 |
| AT5G64940 | ABC2 HOMOLOG 13 (ATH1      | not DE | DOWN | -0.26 |
| AT2G46830 | CIRCADIAN CLOCK ASSO       | not DE | DOWN | 0.00  |
| AT1G78070 | na                         | not DE | DOWN | 0.05  |



|           |                        |        |      |       |
|-----------|------------------------|--------|------|-------|
| AT5G53370 | PECTIN METHYLESTERAS   | not DE | DOWN | 0.01  |
| AT1G70700 | (TIFY7)                | not DE | DOWN | -0.08 |
| AT1G69570 | na                     | not DE | DOWN | -0.44 |
| AT1G07180 | ALTERNATIVE NAD(P)H D  | not DE | DOWN | -0.34 |
| AT5G36870 | GLUCAN SYNTHASE-LIKE   | not DE | DOWN | 0.38  |
| AT5G60660 | PLASMA MEMBRANE INTR   | not DE | DOWN | -0.02 |
| AT4G35090 | CATALASE 2 (CAT2)      | not DE | DOWN | -0.23 |
| AT1G04040 | na                     | not DE | DOWN | -0.34 |
| AT1G12520 | COPPER CHAPERONE FOI   | not DE | DOWN | 0.17  |
| AT5G11790 | N-MYC DOWNREGULATEC    | not DE | DOWN | -0.04 |
| AT5G25810 | TINY (tny)             | not DE | DOWN | -0.03 |
| AT2G35860 | FASCICLIN-LIKE ARABINO | not DE | DOWN | -0.07 |
| AT1G48500 | JASMONATE-ZIM-DOMAIN   | not DE | DOWN | 0.02  |
| AT1G44575 | NONPHOTOCHEMICAL QU    | not DE | DOWN | -0.31 |
| AT2G35859 | na                     | not DE | DOWN | -0.07 |
| AT1G70940 | PIN-FORMED 3 (PIN3)    | not DE | DOWN | -0.30 |
| AT3G53420 | PLASMA MEMBRANE INTR   | not DE | DOWN | -0.37 |
| AT3G52370 | FASCICLIN-LIKE ARABINO | not DE | DOWN | -0.04 |
| AT4G17340 | TONOPLAST INTRINSIC PF | not DE | DOWN | -0.25 |
| AT2G30210 | LACCASE 3 (LAC3)       | not DE | DOWN | -0.37 |
| AT3G59930 | na                     | not DE | DOWN | -0.07 |
| AT2G44110 | MILDEW RESISTANCE LOC  | not DE | DOWN | -0.10 |
| AT3G56000 | CELLULOSE SYNTHASE LI  | not DE | DOWN | -0.40 |
| AT2G28470 | BETA-GALACTOSIDASE 8   | not DE | DOWN | -0.48 |
| AT5G66580 | na                     | not DE | DOWN | 0.02  |
| AT5G52310 | LOW-TEMPERATURE-INDU   | not DE | DOWN | 0.05  |
| AT1G53830 | PECTIN METHYLESTERAS   | not DE | DOWN | 0.09  |
| AT1G08990 | PLANT GLYCOGENIN-LIKE  | not DE | DOWN | -0.37 |
| AT5G52570 | BETA-CAROTENE HYDRO    | not DE | DOWN | -0.29 |
| AT5G47450 | TONOPLAST INTRINSIC PF | not DE | DOWN | -0.34 |
| AT3G45700 | na                     | not DE | DOWN | -0.21 |
| AT2G33790 | ARABINO GALACTAN PRO   | not DE | DOWN | 0.24  |
| AT2G28190 | COPPER/ZINC SUPEROXID  | not DE | DOWN | 0.33  |
| AT3G44990 | XYLOGLUCAN ENDO-TRAF   | not DE | DOWN | -0.13 |
| AT2G45750 | na                     | not DE | DOWN | -0.30 |
| AT5G52900 | MEMBRANE-ASSOCIATED    | not DE | DOWN | -0.63 |
| AT1G29510 | SMALL AUXIN UPREGULA   | not DE | DOWN | -0.57 |
| AT4G15290 | (ATCSLB05)             | not DE | DOWN | 0.02  |
| AT1G57560 | MYB DOMAIN PROTEIN 50  | not DE | DOWN | 0.08  |
| AT4G00680 | ACTIN DEPOLYMERIZING   | not DE | DOWN | -0.81 |
| AT4G09990 | na                     | not DE | DOWN | -0.82 |
| AT2G34910 | na                     | not DE | DOWN | -0.43 |

|           |                         |        |        |       |
|-----------|-------------------------|--------|--------|-------|
| AT5G58010 | LJRHL1-LIKE 3 (LRL3)    | not DE | DOWN   | -0.59 |
| AT2G41970 | na                      | not DE | DOWN   | -0.95 |
| AT5G05500 | (MOP10)                 | not DE | DOWN   | -1.03 |
| AT2G47540 | na                      | not DE | DOWN   | -0.91 |
| AT2G37030 | na                      | not DE | DOWN   | -1.55 |
| AT3G07070 | na                      | not DE | DOWN   | -1.06 |
| AT5G61350 | na                      | not DE | DOWN   | -0.91 |
| AT5G49080 | EXTENSIN 11 (EXT11)     | not DE | DOWN   | -1.64 |
| AT1G63450 | ROOT HAIR SPECIFIC 8 (R | not DE | DOWN   | -0.67 |
| AT2G38995 | na                      | not DE | DOWN   | 0.29  |
| AT4G08410 | na                      | not DE | DOWN   | -1.73 |
| AT2G47530 | na                      | not DE | DOWN   | -1.48 |
| AT4G08400 | na                      | not DE | DOWN   | -1.58 |
| AT1G53920 | GDSL-MOTIF LIPASE 5 (GL | DOWN   | not DE | -0.72 |
| AT5G36910 | THIONIN 2.2 (THI2.2)    | DOWN   | not DE | -0.68 |
| AT5G20630 | GERMIN 3 (GER3)         | DOWN   | not DE | -0.83 |
| AT4G00165 | na                      | DOWN   | not DE | -1.06 |
| AT5G38990 | na                      | DOWN   | not DE | -0.55 |
| AT2G43535 | na                      | DOWN   | not DE | -0.45 |
| AT4G04330 | HOMOLOGUE OF CYANOBE    | DOWN   | not DE | -0.94 |
| AT4G16870 | na                      | DOWN   | not DE | -0.44 |
| AT4G26700 | FIMBRIN 1 (FIM1)        | DOWN   | not DE | -0.50 |
| AT3G53720 | CATION/H+ EXCHANGER 2   | DOWN   | not DE | -0.69 |
| AT2G23910 | na                      | DOWN   | not DE | -1.20 |
| AT5G19140 | (AILP1)                 | DOWN   | not DE | -0.49 |
| AT5G65010 | ASPARAGINE SYNTHETAS    | DOWN   | not DE | -0.57 |
| AT1G66970 | SHV3-LIKE 2 (SVL2)      | DOWN   | not DE | -0.51 |
| AT4G04340 | na                      | DOWN   | not DE | -0.52 |
| AT4G16920 | na                      | DOWN   | not DE | -0.38 |
| AT5G49730 | FERRIC REDUCTION OXID   | DOWN   | not DE | -0.97 |
| AT1G66980 | SUPPRESSOR OF NPR1-1    | DOWN   | not DE | -0.53 |
| AT2G23840 | na                      | DOWN   | not DE | -0.75 |
| AT1G71030 | MYB-LIKE 2 (MYBL2)      | DOWN   | not DE | -0.42 |
| AT1G23480 | CELLULOSE SYNTHASE-LI   | DOWN   | not DE | -0.53 |
| AT4G16950 | RECOGNITION OF PERON    | DOWN   | not DE | -0.35 |
| AT3G10520 | HAEMOGLOBIN 2 (HB2)     | DOWN   | not DE | -1.08 |
| AT4G16890 | SUPPRESSOR OF NPR1-1,   | DOWN   | not DE | -0.35 |
| AT1G65230 | na                      | DOWN   | not DE | -0.73 |
| AT1G61190 | na                      | DOWN   | not DE | -0.76 |
| AT2G38460 | IRON REGULATED 1 (IREG  | DOWN   | not DE | -0.92 |
| AT1G61300 | na                      | DOWN   | not DE | -0.96 |
| AT2G15080 | RECEPTOR LIKE PROTEIN   | DOWN   | not DE | -0.58 |

|           |                         |      |        |       |
|-----------|-------------------------|------|--------|-------|
| AT2G29360 | na                      | DOWN | not DE | -0.64 |
| AT5G15970 | (KIN2)                  | DOWN | not DE | -0.61 |
| AT3G22840 | EARLY LIGHT-INDUCABLE   | DOWN | not DE | -0.92 |
| AT1G57980 | na                      | DOWN | not DE | -0.60 |
| AT3G28220 | na                      | DOWN | not DE | -1.05 |
| AT3G55240 | na                      | DOWN | not DE | -1.23 |
| AT3G46370 | na                      | DOWN | not DE | -2.19 |
| AT4G28080 | na                      | DOWN | DOWN   | -0.37 |
| AT1G20650 | ALTERED SEED GERMINA    | DOWN | DOWN   | -0.36 |
| AT2G29290 | na                      | DOWN | DOWN   | -0.95 |
| AT1G72600 | na                      | DOWN | DOWN   | -1.18 |
| AT1G72610 | GERMIN-LIKE PROTEIN 1 ( | DOWN | DOWN   | -1.18 |
| AT1G30360 | EARLY-RESPONSIVE TO D   | DOWN | DOWN   | -0.42 |
| AT2G22540 | SHORT VEGETATIVE PHA    | DOWN | DOWN   | -0.45 |
| AT4G37925 | NADH DEHYDROGENASE-     | DOWN | DOWN   | -0.89 |
| AT4G34250 | 3-KETOACYL-COA SYNTH    | DOWN | DOWN   | -0.47 |
| AT4G19170 | NINE-CIS-EPOXYCAROTEI   | DOWN | DOWN   | -0.75 |
| AT3G52840 | BETA-GALACTOSIDASE 2    | DOWN | DOWN   | -0.38 |
| AT4G01330 | na                      | DOWN | DOWN   | -0.38 |
| AT1G76100 | PLASTOCYANIN 1 (PETE1)  | DOWN | DOWN   | -0.54 |
| AT2G37025 | TRF-LIKE 8 (TRFL8)      | DOWN | DOWN   | -0.52 |
| AT3G61580 | SPHINGOID LCB DESATUF   | DOWN | DOWN   | -0.48 |
| AT3G51950 | na                      | DOWN | DOWN   | -0.36 |
| AT1G61520 | PHOTOSYSTEM I LIGHT H   | DOWN | DOWN   | -0.34 |
| AT3G04910 | WITH NO LYSINE (K) KINA | DOWN | DOWN   | -0.47 |
| AT5G58140 | PHOTOTROPIN 2 (PHOT2)   | DOWN | DOWN   | -0.59 |
| AT3G59780 | na                      | DOWN | DOWN   | -0.40 |
| AT1G16720 | HIGH CHLOROPHYLL FLUC   | DOWN | DOWN   | -0.57 |
| AT4G05180 | PHOTOSYSTEM II SUBUNI   | DOWN | DOWN   | -0.42 |
| AT1G33240 | GT-2-LIKE 1 (GTL1)      | DOWN | DOWN   | -0.45 |
| AT5G05690 | CONSTITUTIVE PHOTOMC    | DOWN | DOWN   | -0.33 |
| AT5G19190 | na                      | DOWN | DOWN   | -0.52 |
| AT1G70820 | na                      | DOWN | DOWN   | -1.30 |
| AT4G10340 | LIGHT HARVESTING COMF   | DOWN | DOWN   | -0.37 |
| AT5G27290 | na                      | DOWN | DOWN   | -0.87 |
| AT1G72180 | na                      | DOWN | DOWN   | -0.42 |
| AT3G54830 | na                      | DOWN | DOWN   | -0.69 |
| AT2G42220 | na                      | DOWN | DOWN   | -0.41 |
| AT5G23060 | CALCIUM SENSING RECEP   | DOWN | DOWN   | -0.60 |
| AT1G48480 | RECEPTOR-LIKE KINASE 1  | DOWN | DOWN   | -0.57 |
| AT3G26280 | CYTOCHROME P450, FAM    | DOWN | DOWN   | -0.59 |
| AT2G16280 | 3-KETOACYL-COA SYNTH    | DOWN | DOWN   | -0.54 |

|           |                         |      |      |       |
|-----------|-------------------------|------|------|-------|
| AT5G49740 | FERRIC REDUCTION OXID   | DOWN | DOWN | -1.00 |
| AT2G18300 | na                      | DOWN | DOWN | -0.71 |
| AT1G66100 | na                      | DOWN | DOWN | -1.02 |
| AT5G67030 | ABA DEFICIENT 1 (ABA1)  | DOWN | DOWN | -0.53 |
| AT1G29920 | CHLOROPHYLL A/B-BINDI   | DOWN | DOWN | -0.49 |
| AT3G20370 | na                      | DOWN | DOWN | -0.51 |
| AT4G23820 | na                      | DOWN | DOWN | -0.53 |
| AT5G54270 | LIGHT-HARVESTING CHLC   | DOWN | DOWN | -0.63 |
| AT2G21140 | PROLINE-RICH PROTEIN 2  | DOWN | DOWN | -0.81 |
| AT1G03130 | PHOTOSYSTEM I SUBUNIT   | DOWN | DOWN | -0.61 |
| AT5G25460 | DUF642 L-GALL RESPON    | DOWN | DOWN | -0.41 |
| AT3G15570 | na                      | DOWN | DOWN | -1.14 |
| AT5G35970 | na                      | DOWN | DOWN | -0.44 |
| AT1G23390 | na                      | DOWN | DOWN | -0.75 |
| AT3G54890 | PHOTOSYSTEM I LIGHT H   | DOWN | DOWN | -0.56 |
| AT1G44446 | CHLORINA 1 (CH1)        | DOWN | DOWN | -0.44 |
| AT3G47470 | LIGHT-HARVESTING CHLC   | DOWN | DOWN | -0.42 |
| AT1G01430 | TRICHOME BIREFRINGEN    | DOWN | DOWN | -0.62 |
| AT3G23030 | INDOLE-3-ACETIC ACID IN | DOWN | DOWN | -0.39 |
| AT2G29650 | PHOSPHATE TRANSPORT     | DOWN | DOWN | -0.63 |
| AT1G13245 | ROTUNDIFOLIA LIKE 17 (R | DOWN | DOWN | -0.46 |
| AT4G12320 | CYTOCHROME P450, FAMI   | DOWN | DOWN | -1.08 |
| AT1G15980 | PHOTOSYNTHETIC NDH 5    | DOWN | DOWN | -0.68 |
| AT1G51500 | ATP-BINDING CASSETTE C  | DOWN | DOWN | -0.53 |
| AT3G56940 | COPPER RESPONSE DEF     | DOWN | DOWN | -0.42 |
| AT5G45950 | na                      | DOWN | DOWN | -0.72 |
| AT3G47500 | CYCLING DOF FACTOR 3 (  | DOWN | DOWN | -0.41 |
| AT5G04530 | 3-KETOACYL-COA SYNTH    | DOWN | DOWN | -0.48 |
| AT2G43010 | PHYTOCHROME INTERAC     | DOWN | DOWN | -0.61 |
| AT3G57400 | na                      | DOWN | DOWN | -0.58 |
| AT3G05910 | na                      | DOWN | DOWN | -0.38 |
| AT1G68530 | 3-KETOACYL-COA SYNTH    | DOWN | DOWN | -0.42 |
| AT4G27310 | na                      | DOWN | DOWN | -0.55 |
| AT2G15090 | 3-KETOACYL-COA SYNTH    | DOWN | DOWN | -0.88 |
| AT1G14280 | PHYTOCHROME KINASE S    | DOWN | DOWN | -0.56 |
| AT5G45820 | CBL-INTERACTING PROTE   | DOWN | DOWN | -0.63 |
| AT5G13770 | na                      | DOWN | DOWN | -0.53 |
| AT1G09310 | na                      | DOWN | DOWN | -0.48 |
| AT1G42550 | PLASTID MOVEMENT IMP    | DOWN | DOWN | -0.39 |
| AT3G01500 | CARBONIC ANHYDRASE 1    | DOWN | DOWN | -0.44 |
| AT1G44000 | na                      | DOWN | DOWN | -0.46 |
| AT1G11410 | na                      | DOWN | DOWN | -0.70 |

|           |                        |      |      |       |
|-----------|------------------------|------|------|-------|
| AT3G44970 | na                     | DOWN | DOWN | -0.42 |
| AT1G75100 | J-DOMAIN PROTEIN REQU  | DOWN | DOWN | -0.54 |
| AT4G25960 | ATP-BINDING CASSETTE E | DOWN | DOWN | -0.62 |
| AT4G34610 | BEL1-LIKE HOMEODOMAIN  | DOWN | DOWN | -0.71 |
| AT4G26530 | FRUCTOSE-BISPHOSPHA    | DOWN | DOWN | -2.33 |
| AT2G39010 | PLASMA MEMBRANE INTR   | DOWN | DOWN | -0.55 |
| AT4G23400 | PLASMA MEMBRANE INTR   | DOWN | DOWN | -0.37 |
| AT2G34620 | na                     | DOWN | DOWN | -0.71 |
| AT1G14290 | SPHINGOID BASE HYDRO   | DOWN | DOWN | -0.48 |
| AT2G29670 | na                     | DOWN | DOWN | -0.96 |
| AT5G12950 | na                     | DOWN | DOWN | -0.72 |
| AT2G25200 | na                     | DOWN | DOWN | -0.80 |
| AT5G08330 | TCP DOMAIN PROTEIN 11  | DOWN | DOWN | -0.88 |
| AT5G44680 | na                     | DOWN | DOWN | -1.11 |
| AT2G02950 | PHYTOCHROME KINASE S   | DOWN | DOWN | -0.61 |
| AT4G26520 | FRUCTOSE-BISPHOSPHA    | DOWN | DOWN | -1.32 |
| AT4G35100 | PLASMA MEMBRANE INTR   | DOWN | DOWN | -0.49 |
| AT3G50820 | PHOTOSYSTEM II SUBUNI  | DOWN | DOWN | -0.55 |
| AT5G17300 | REVEILLE 1 (RVE1)      | DOWN | DOWN | -0.43 |
| AT1G15260 | na                     | DOWN | DOWN | -0.92 |
| AT3G48420 | na                     | DOWN | DOWN | -0.58 |
| AT4G36220 | FERULIC ACID 5-HYDROX  | DOWN | DOWN | -0.66 |
| AT5G54630 | na                     | DOWN | DOWN | -0.84 |
| AT5G65730 | XYLOGLUCAN ENDOTRAN    | DOWN | DOWN | -0.95 |
| AT3G62030 | ROTAMASE CYP 4 (ROC4)  | DOWN | DOWN | -0.40 |
| AT2G05070 | PHOTOSYSTEM II LIGHT H | DOWN | DOWN | -0.66 |
| AT5G27360 | (SFP2)                 | DOWN | DOWN | -0.88 |
| AT2G15020 | na                     | DOWN | DOWN | -0.88 |
| AT4G36540 | BR ENHANCED EXPRESSI   | DOWN | DOWN | -0.87 |
| AT2G05100 | PHOTOSYSTEM II LIGHT H | DOWN | DOWN | -0.67 |
| AT3G27690 | PHOTOSYSTEM II LIGHT H | DOWN | DOWN | -0.75 |
| AT1G55260 | na                     | DOWN | DOWN | -0.69 |
| AT5G11420 | na                     | DOWN | DOWN | -0.66 |
| AT2G30010 | TRICHOME BIREFRINGEN   | DOWN | DOWN | -0.97 |
| AT3G12320 | na                     | DOWN | DOWN | -0.59 |
| AT5G10150 | na                     | DOWN | DOWN | -0.75 |
| AT3G14810 | MECHANOSENSITIVE CHA   | DOWN | DOWN | -0.66 |
| AT3G16370 | na                     | DOWN | DOWN | -0.71 |
| AT4G18570 | na                     | DOWN | DOWN | -0.91 |
| AT1G29660 | na                     | DOWN | DOWN | -0.50 |
| AT1G67900 | na                     | DOWN | DOWN | -0.83 |
| AT3G45780 | PHOTOTROPIN 1 (PHOT1)  | DOWN | DOWN | -0.77 |

|           |                          |      |      |       |
|-----------|--------------------------|------|------|-------|
| AT5G43870 | na                       | DOWN | DOWN | -0.92 |
| AT4G38690 | na                       | DOWN | DOWN | -1.08 |
| AT2G28950 | EXPANSIN A6 (EXPA6)      | DOWN | DOWN | -0.88 |
| AT5G12960 | na                       | DOWN | DOWN | -0.72 |
| AT5G16030 | na                       | DOWN | DOWN | -1.19 |
| AT5G40380 | CYSTEINE-RICH RLK (REC   | DOWN | DOWN | -1.15 |
| AT1G04240 | SHORT HYPOCOTYL 2 (SH    | DOWN | DOWN | -0.60 |
| AT5G62430 | CYCLING DOF FACTOR 1 (   | DOWN | DOWN | -0.99 |
| AT4G18220 | na                       | DOWN | DOWN | -0.94 |
| AT5G03120 | na                       | DOWN | DOWN | -1.00 |
| AT5G57780 | P1R1 (P1R1)              | DOWN | DOWN | -0.96 |
| AT3G48720 | DEFICIENT IN CUTIN FERL  | DOWN | DOWN | -1.06 |
| AT4G04840 | METHIONINE SULFOXIDE I   | DOWN | DOWN | -1.22 |
| AT5G15310 | MYB DOMAIN PROTEIN 16    | DOWN | DOWN | -1.17 |
| AT5G61270 | PHYTOCHROME-INTERAC      | DOWN | DOWN | -1.03 |
| AT2G44230 | na                       | DOWN | DOWN | -1.07 |
| AT4G02850 | na                       | DOWN | DOWN | -0.98 |
| AT5G04960 | na                       | DOWN | DOWN | -1.15 |
| AT4G19690 | IRON-REGULATED TRANS     | DOWN | DOWN | -0.81 |
| AT3G54590 | HYDROXYPROLINE-RICH (    | DOWN | DOWN | -1.29 |
| AT1G18810 | na                       | DOWN | DOWN | -1.02 |
| AT5G10250 | DEFECTIVELY ORGANIZEI    | DOWN | DOWN | -1.61 |
| AT3G10710 | ROOT HAIR SPECIFIC 12 (I | DOWN | DOWN | -1.24 |
| AT1G48930 | GLYCOSYL HYDROLASE 9     | DOWN | DOWN | -1.37 |
| AT3G09925 | na                       | DOWN | DOWN | -0.83 |
| AT4G34580 | CAN OF WORMS1 (COW1)     | DOWN | DOWN | -1.35 |
| AT3G21180 | AUTOINHIBITED CA(2+)-AT  | DOWN | DOWN | -1.79 |
| AT1G30870 | na                       | DOWN | DOWN | -0.76 |
| AT3G49960 | na                       | DOWN | DOWN | -2.61 |
| AT1G12040 | LEUCINE-RICH REPEAT/E)   | DOWN | DOWN | -1.51 |
| AT5G67400 | ROOT HAIR SPECIFIC 19 (I | DOWN | DOWN | -2.08 |
| AT4G40090 | ARABINO GALACTAN PRO1    | DOWN | DOWN | -1.45 |
| AT1G62980 | EXPANSIN A18 (EXPA18)    | DOWN | DOWN | -1.49 |
| AT1G12560 | EXPANSIN A7 (EXPA7)      | DOWN | DOWN | -1.09 |
| AT3G62680 | PROLINE-RICH PROTEIN 3   | DOWN | DOWN | -1.98 |
| AT5G57625 | na                       | DOWN | DOWN | -1.87 |
| AT1G27140 | GLUTATHIONE S-TRANSFI    | DOWN | DOWN | -2.42 |
| AT4G02270 | ROOT HAIR SPECIFIC 13 (I | DOWN | DOWN | -1.75 |
| AT5G49270 | SHAVEN 2 (SHV2)          | DOWN | DOWN | -1.63 |
| AT5G35190 | EXTENSIN 13 (EXT13)      | DOWN | DOWN | -1.80 |
| AT1G05240 | na                       | DOWN | DOWN | -2.47 |
| AT1G05250 | na                       | DOWN | DOWN | -2.47 |

AT2G03720 MORPHOGENESIS OF ROOT(DOWN DOWN -1.93

i. UP refers to genes that have higher expression levels in the inducible SPCH line (l differentially expressed transcripts with a FDR < 0.05 were deemed significant.

| p.adj.6h <sup>2</sup> | log2(iSPCH/WT)_8h | p.adj.8h <sup>2</sup> | mean_iSPCH_ | mean_iSPCH_ |
|-----------------------|-------------------|-----------------------|-------------|-------------|
| 0                     | 8.41              | 0                     | 201.08      | 37372.30    |
| 1.12E-97              | 5.42              | 1.73E-220             | 66.44       | 533.89      |
| 1.54E-18              | 4.71              | 4.17E-39              | 42.46       | 113.71      |
| 5.39E-15              | 3.96              | 2.36E-86              | 109.33      | 174.14      |
| 2.39E-148             | 3.96              | 1.03E-204             | 344.06      | 2670.96     |
| 0.019534588           | 3.12              | 7.57E-21              | 59.28       | 51.91       |
| 2.76E-18              | 2.92              | 1.08E-31              | 20.72       | 205.78      |
| 9.48E-12              | 2.82              | 1.83E-79              | 166.24      | 445.70      |
| 0.000759107           | 2.79              | 2.24E-13              | 27.00       | 62.36       |
| 7.66E-05              | 2.77              | 2.52E-09              | 51.58       | 51.38       |
| 3.84E-16              | 2.37              | 1.69E-36              | 156.55      | 339.09      |
| 0.003200765           | 2.35              | 1.33E-13              | 123.34      | 185.13      |
| 1.80E-05              | 2.30              | 6.04E-19              | 196.57      | 117.38      |
| 0.000447645           | 2.22              | 3.46E-13              | 41.87       | 84.86       |
| 0.019858454           | 2.14              | 6.20E-10              | 42.84       | 60.31       |
| 0.009775118           | 2.12              | 7.46E-19              | 114.09      | 110.07      |
| 1.08E-19              | 2.12              | 5.03E-62              | 554.07      | 833.68      |
| 5.39E-15              | 2.09              | 1.30E-33              | 586.56      | 1160.91     |
| 2.67E-11              | 2.02              | 1.83E-30              | 212.91      | 318.26      |
| 0.040823113           | 1.90              | 3.17E-18              | 154.05      | 131.99      |
| 1.66E-18              | 1.86              | 5.04E-23              | 216.18      | 990.92      |
| 0.006510814           | 1.83              | 1.03E-22              | 200.81      | 209.46      |
| 8.77E-05              | 1.80              | 4.79E-08              | 353.77      | 809.98      |
| 0.045807271           | 1.76              | 6.49E-24              | 157.84      | 224.21      |
| 0.009823904           | 1.76              | 1.32E-50              | 1071.31     | 787.34      |
| 4.77E-20              | 1.74              | 2.80E-59              | 955.74      | 2527.74     |
| 2.15E-05              | 1.74              | 4.78E-11              | 38.98       | 164.91      |
| 0.001223077           | 1.73              | 1.98E-10              | 34.73       | 101.40      |
| 1.16E-25              | 1.70              | 3.18E-54              | 1175.19     | 2444.94     |
| 0.015696046           | 1.59              | 1.98E-11              | 115.09      | 150.29      |
| 5.97E-05              | 1.58              | 6.20E-10              | 261.42      | 341.37      |
| 1.80E-05              | 1.47              | 5.52E-30              | 352.11      | 724.06      |
| 0.032168761           | 1.46              | 4.35E-09              | 69.83       | 152.96      |
| 1.33E-09              | 1.44              | 3.30E-35              | 1020.56     | 1319.88     |
| 9.59E-06              | 1.33              | 2.74E-20              | 235.75      | 480.94      |
| 1.08E-07              | 1.27              | 1.50E-34              | 1624.96     | 3215.96     |



|             |       |            |         |         |
|-------------|-------|------------|---------|---------|
| 0.000828887 | 1.26  | 1.05E-20   | 189.80  | 668.07  |
| 9.76E-15    | 1.25  | 5.84E-28   | 803.25  | 1925.15 |
| 0.030700839 | 1.11  | 1.95E-09   | 365.84  | 255.98  |
| 0.017791015 | 1.09  | 5.78E-07   | 675.05  | 1576.04 |
| 0.032460013 | 1.07  | 1.80E-10   | 399.46  | 318.26  |
| 0.014022847 | 1.02  | 1.18E-08   | 218.61  | 314.93  |
| 3.54E-08    | 1.01  | 4.93E-17   | 102.15  | 1320.39 |
| 1.47E-09    | 0.98  | 2.09E-18   | 510.12  | 2341.65 |
| 0.030365324 | 0.98  | 4.32E-12   | 1158.26 | 959.29  |
| 0.000820959 | 0.96  | 3.26E-05   | 215.44  | 185.70  |
| 0.001587984 | 0.85  | 1.13E-14   | 2415.69 | 2787.02 |
| 9.76E-15    | 0.80  | 0.0007639  | 13.00   | 1992.41 |
| 3.85E-07    | 0.79  | 5.36E-06   | 249.90  | 445.53  |
| 1.19E-05    | 0.79  | 9.58E-10   | 884.19  | 1125.46 |
| 0.017517319 | 0.75  | 7.29E-10   | 1000.12 | 1233.31 |
| 0.000834962 | 0.70  | 0.00055704 | 586.30  | 434.54  |
| 0.048714618 | 0.69  | 7.83E-05   | 737.50  | 331.22  |
| 0.003955929 | 0.68  | 0.00087517 | 98.26   | 441.81  |
| 1.69E-10    | 0.68  | 8.99E-10   | 3208.43 | 3482.36 |
| 0.006565732 | 0.64  | 0.00028626 | 67.90   | 505.71  |
| 0.001233811 | 0.62  | 6.61E-08   | 620.29  | 2829.65 |
| 0.030810185 | 0.62  | 0.00047008 | 526.89  | 386.01  |
| 0.047268441 | 0.59  | 0.00010261 | 952.34  | 528.60  |
| 0.029849692 | 0.58  | 0.00133696 | 336.02  | 424.26  |
| 0.000452268 | 0.57  | 3.96E-07   | 5270.14 | 4254.11 |
| 9.83E-13    | 0.55  | 0.00031977 | 321.23  | 953.77  |
| 0.009788874 | 0.45  | 0.00013384 | 1688.97 | 6997.91 |
| 0.038054127 | 0.30  | 0.47217851 | 1867.49 | 506.11  |
| 2.06E-05    | 0.26  | 0.20194618 | 2421.08 | 3432.25 |
| 2.78E-05    | 0.26  | 0.20297524 | 2448.04 | 3472.82 |
| 0.001067175 | 0.02  | 1          | 1554.19 | 2544.42 |
| 0.000227913 | -0.07 | 1          | 416.45  | 634.42  |
| 0.020228861 | -0.07 | 1          | 661.47  | 1159.96 |
| 0.023602566 | -0.43 | 0.21402741 | 335.65  | 342.73  |
| 0.048714618 | -0.70 | 0.16513796 | 61.14   | 112.69  |
| 0.037437928 | -0.46 | 0.01049083 | 1946.34 | 944.41  |
| 1           | 5.64  | 0.00032328 | 3.87    | 1.09    |
| 1           | 4.35  | 0.03533577 | 0.95    | 3.37    |
| 1           | 4.15  | 0.00211981 | 20.67   | 1.97    |
| 1           | 3.76  | 1.75E-08   | 10.57   | 11.03   |
| 1           | 3.05  | 3.68E-06   | 2.91    | 38.38   |
| 1           | 3.00  | 8.70E-16   | 15.92   | 32.47   |

|             |      |            |         |         |
|-------------|------|------------|---------|---------|
| 1           | 2.98 | 7.71E-06   | 37.05   | 16.33   |
| 1           | 2.95 | 8.85E-05   | 9.14    | 4.55    |
| 1           | 2.78 | 8.68E-05   | 36.59   | 18.82   |
| 1           | 2.65 | 2.72E-09   | 9.69    | 46.70   |
| 0.766372432 | 2.60 | 8.02E-05   | 6.30    | 9.02    |
| 1           | 2.59 | 8.21E-07   | 3.39    | 13.92   |
| 1           | 2.51 | 0.0001543  | 13.97   | 35.63   |
| 1           | 2.45 | 5.82E-12   | 14.45   | 41.66   |
| 1           | 2.37 | 0.00018259 | 17.41   | 23.55   |
| 1           | 2.35 | 7.04E-10   | 27.47   | 57.20   |
| 1           | 2.28 | 4.87E-08   | 23.63   | 42.02   |
| 1           | 2.08 | 4.20E-11   | 28.89   | 60.75   |
| 0.325824149 | 2.05 | 1.34E-16   | 67.01   | 87.01   |
| 1           | 2.03 | 0.00127841 | 126.72  | 276.73  |
| 0.89590341  | 2.00 | 2.03E-07   | 28.42   | 24.60   |
| 1           | 1.98 | 2.54E-06   | 4.82    | 32.52   |
| 0.592972341 | 1.98 | 2.49E-06   | 85.07   | 318.87  |
| 1           | 1.94 | 0.00163272 | 99.18   | 124.47  |
| 1           | 1.94 | 5.05E-09   | 42.40   | 24.68   |
| 0.443349326 | 1.86 | 2.44E-09   | 3627.83 | 2587.73 |
| 1           | 1.70 | 1.02E-05   | 118.00  | 130.60  |
| 1           | 1.67 | 1.02E-06   | 38.51   | 59.43   |
| 1           | 1.66 | 3.32E-09   | 52.03   | 71.51   |
| 1           | 1.63 | 7.27E-06   | 56.89   | 161.19  |
| 0.074389821 | 1.62 | 7.03E-16   | 222.69  | 209.20  |
| 0.184507611 | 1.60 | 8.55E-07   | 40.95   | 66.04   |
| 0.626432848 | 1.58 | 2.93E-17   | 63.16   | 186.27  |
| 1           | 1.57 | 6.27E-07   | 54.92   | 415.07  |
| 0.292601428 | 1.54 | 1.27E-24   | 654.90  | 620.02  |
| 1           | 1.52 | 5.65E-14   | 1497.60 | 574.87  |
| 1           | 1.50 | 1.18E-05   | 21.19   | 32.21   |
| 1           | 1.49 | 4.40E-05   | 62.12   | 35.19   |
| 1           | 1.48 | 6.59E-08   | 128.56  | 68.71   |
| 0.800266842 | 1.47 | 4.02E-15   | 324.00  | 125.04  |
| 1           | 1.45 | 5.40E-12   | 59.78   | 142.15  |
| 1           | 1.43 | 0.00013947 | 92.49   | 45.38   |
| 1           | 1.42 | 3.48E-09   | 1084.33 | 902.71  |
| 0.231377795 | 1.42 | 7.81E-32   | 779.77  | 826.50  |
| 1           | 1.42 | 7.20E-18   | 368.63  | 244.86  |
| 1           | 1.40 | 0.00155861 | 8.68    | 32.91   |
| 0.762901076 | 1.39 | 1.55E-15   | 3792.69 | 6442.24 |
| 0.142640045 | 1.38 | 2.04E-23   | 474.81  | 501.20  |

|             |      |            |         |         |
|-------------|------|------------|---------|---------|
| 1           | 1.36 | 6.42E-09   | 92.44   | 103.72  |
| 1           | 1.36 | 5.28E-19   | 156.44  | 320.58  |
| 0.447821193 | 1.35 | 6.15E-08   | 112.60  | 117.16  |
| 1           | 1.34 | 4.03E-12   | 75.49   | 154.80  |
| 0.633715702 | 1.34 | 4.04E-28   | 1125.67 | 830.49  |
| 1           | 1.33 | 7.34E-07   | 60.18   | 65.47   |
| 1           | 1.30 | 2.49E-10   | 45.29   | 155.54  |
| 0.999702177 | 1.27 | 1.80E-10   | 89.05   | 194.36  |
| 0.056991947 | 1.27 | 2.03E-08   | 176.08  | 135.28  |
| 1           | 1.26 | 7.91E-06   | 83.77   | 81.27   |
| 0.416406185 | 1.24 | 9.02E-10   | 649.88  | 466.28  |
| 1           | 1.24 | 3.41E-12   | 478.31  | 155.67  |
| 1           | 1.23 | 3.20E-12   | 42.84   | 241.28  |
| 1           | 1.23 | 0.00026531 | 24.05   | 40.96   |
| 0.611390707 | 1.23 | 5.58E-13   | 199.98  | 290.60  |
| 1           | 1.23 | 8.23E-05   | 62.68   | 25.82   |
| 1           | 1.23 | 6.86E-14   | 301.40  | 254.23  |
| 1           | 1.21 | 0.00597858 | 555.72  | 222.46  |
| 1           | 1.20 | 1.04E-09   | 94.84   | 162.50  |
| 0.692708418 | 1.20 | 1.58E-10   | 363.35  | 181.58  |
| 1           | 1.19 | 0.00108478 | 62.09   | 40.66   |
| 0.332401211 | 1.18 | 1.12E-07   | 97.41   | 92.17   |
| 1           | 1.18 | 0.00078799 | 24.57   | 57.29   |
| 1           | 1.18 | 1.59E-10   | 122.25  | 177.90  |
| 1           | 1.17 | 1.35E-06   | 107.94  | 96.15   |
| 1           | 1.17 | 5.65E-14   | 962.45  | 284.91  |
| 1           | 1.17 | 3.76E-07   | 71.32   | 126.83  |
| 0.91439375  | 1.16 | 7.90E-07   | 633.91  | 1188.88 |
| 1           | 1.15 | 8.60E-05   | 89.64   | 119.04  |
| 0.059742206 | 1.13 | 1.22E-08   | 130.40  | 389.73  |
| 1           | 1.13 | 2.86E-07   | 110.74  | 135.46  |
| 1           | 1.11 | 2.14E-13   | 229.80  | 445.58  |
| 0.256151691 | 1.11 | 5.62E-09   | 122.90  | 238.39  |
| 1           | 1.09 | 1.30E-07   | 278.32  | 335.55  |
| 1           | 1.09 | 1.25E-14   | 167.15  | 470.87  |
| 1           | 1.06 | 4.30E-07   | 76.18   | 224.17  |
| 1           | 1.05 | 1.50E-14   | 750.45  | 507.11  |
| 0.471535827 | 1.04 | 5.23E-09   | 244.04  | 221.80  |
| 1           | 1.04 | 1.09E-12   | 202.32  | 394.68  |
| 1           | 1.01 | 3.41E-10   | 1598.56 | 460.68  |
| 1           | 1.01 | 4.00E-07   | 110.62  | 178.91  |
| 0.61636868  | 1.00 | 4.47E-10   | 461.11  | 346.05  |

|             |      |            |         |         |
|-------------|------|------------|---------|---------|
| 0.074065238 | 1.00 | 4.27E-13   | 437.89  | 616.96  |
| 1           | 0.99 | 1.54E-09   | 492.86  | 250.16  |
| 1           | 0.98 | 6.79E-08   | 714.40  | 780.73  |
| 0.500484179 | 0.98 | 3.02E-21   | 2347.22 | 4177.08 |
| 1           | 0.98 | 2.88E-09   | 183.38  | 251.87  |
| 1           | 0.98 | 6.98E-08   | 109.22  | 238.96  |
| 1           | 0.98 | 5.25E-20   | 1196.81 | 2701.32 |
| 0.971035353 | 0.97 | 4.98E-19   | 1583.08 | 1984.85 |
| 1           | 0.96 | 0.00076711 | 324.80  | 815.57  |
| 0.134823999 | 0.96 | 2.72E-09   | 126.79  | 383.47  |
| 0.835820639 | 0.96 | 1.39E-15   | 444.66  | 1184.07 |
| 1           | 0.95 | 3.90E-07   | 176.04  | 186.57  |
| 1           | 0.95 | 2.83E-09   | 162.98  | 378.79  |
| 1           | 0.95 | 6.14E-10   | 955.68  | 1082.88 |
| 0.192771852 | 0.94 | 3.62E-18   | 2537.87 | 2385.46 |
| 1           | 0.94 | 0.0001788  | 119.91  | 111.08  |
| 1           | 0.94 | 4.12E-15   | 906.85  | 984.67  |
| 0.668347168 | 0.93 | 8.01E-12   | 825.68  | 531.66  |
| 1           | 0.93 | 1.30E-07   | 250.57  | 337.56  |
| 1           | 0.92 | 0.0002325  | 41.55   | 126.83  |
| 1           | 0.92 | 4.12E-08   | 258.07  | 293.36  |
| 1           | 0.91 | 4.69E-05   | 152.75  | 159.09  |
| 1           | 0.91 | 0.00065227 | 1270.15 | 2841.42 |
| 0.4438406   | 0.91 | 1.92E-07   | 1164.97 | 517.09  |
| 1           | 0.90 | 0.00036209 | 174.98  | 109.33  |
| 1           | 0.89 | 6.20E-10   | 436.52  | 479.80  |
| 0.383262572 | 0.89 | 1.33E-09   | 333.13  | 500.06  |
| 1           | 0.88 | 0.0020644  | 210.28  | 58.95   |
| 1           | 0.88 | 0.00394613 | 96.38   | 81.14   |
| 1           | 0.88 | 1.92E-09   | 274.56  | 495.82  |
| 1           | 0.87 | 4.55E-12   | 1990.31 | 4183.45 |
| 1           | 0.85 | 0.02806096 | 70.47   | 75.76   |
| 1           | 0.84 | 0.00013262 | 49.06   | 153.44  |
| 0.598638652 | 0.83 | 2.24E-13   | 778.27  | 1689.08 |
| 1           | 0.83 | 0.00472694 | 148.28  | 89.94   |
| 0.099692181 | 0.81 | 1.02E-07   | 655.09  | 497.61  |
| 1           | 0.80 | 4.24E-09   | 521.48  | 669.73  |
| 1           | 0.80 | 0.00010261 | 703.49  | 761.21  |
| 1           | 0.80 | 4.36E-08   | 615.10  | 537.13  |
| 0.609863121 | 0.78 | 9.08E-09   | 534.66  | 719.85  |
| 1           | 0.78 | 9.21E-06   | 160.09  | 342.16  |
| 0.405123378 | 0.77 | 0.00392564 | 238.08  | 151.91  |

|             |      |            |         |         |
|-------------|------|------------|---------|---------|
| 1           | 0.76 | 0.00018605 | 188.38  | 287.58  |
| 1           | 0.76 | 0.00044935 | 117.07  | 210.33  |
| 0.417482339 | 0.76 | 6.09E-05   | 406.94  | 177.86  |
| 0.958118834 | 0.75 | 8.51E-08   | 1775.84 | 775.31  |
| 1           | 0.75 | 2.99E-08   | 569.26  | 740.99  |
| 1           | 0.75 | 3.95E-06   | 708.32  | 939.47  |
| 0.414062537 | 0.74 | 6.92E-09   | 816.69  | 996.53  |
| 1           | 0.74 | 0.00027595 | 198.78  | 196.81  |
| 1           | 0.73 | 6.31E-05   | 671.27  | 779.41  |
| 1           | 0.73 | 2.72E-08   | 3248.81 | 3927.82 |
| 1           | 0.72 | 5.36E-06   | 235.86  | 402.16  |
| 0.682022637 | 0.72 | 1.76E-08   | 1301.55 | 1704.35 |
| 1           | 0.70 | 1.09E-05   | 1090.58 | 271.92  |
| 0.645665068 | 0.70 | 0.00103081 | 665.29  | 221.58  |
| 1           | 0.68 | 4.61E-08   | 1710.63 | 1296.32 |
| 1           | 0.68 | 7.70E-06   | 524.54  | 414.72  |
| 1           | 0.68 | 1.06E-05   | 487.55  | 454.72  |
| 0.723896029 | 0.68 | 0.00039253 | 430.30  | 279.01  |
| 0.680196308 | 0.68 | 2.89E-10   | 9917.85 | 8103.25 |
| 1           | 0.68 | 0.00021738 | 245.24  | 259.62  |
| 1           | 0.67 | 4.59E-07   | 734.50  | 763.58  |
| 0.401282291 | 0.65 | 0.00748405 | 622.96  | 387.46  |
| 0.929485597 | 0.65 | 0.00789165 | 297.98  | 175.85  |
| 1           | 0.65 | 0.01538877 | 272.90  | 154.01  |
| 1           | 0.64 | 0.00020112 | 261.77  | 299.53  |
| 1           | 0.64 | 7.71E-07   | 865.17  | 860.65  |
| 0.80122176  | 0.64 | 2.92E-08   | 1215.90 | 2178.27 |
| 1           | 0.63 | 7.32E-08   | 1487.13 | 1177.60 |
| 0.316047223 | 0.63 | 0.01122766 | 1406.45 | 479.63  |
| 0.308365027 | 0.63 | 0.00115043 | 345.48  | 304.26  |
| 0.397972883 | 0.63 | 0.02645197 | 589.08  | 342.69  |
| 0.829853927 | 0.63 | 2.14E-05   | 1068.62 | 596.52  |
| 0.615166995 | 0.63 | 0.01163844 | 146.43  | 200.62  |
| 1           | 0.62 | 4.82E-05   | 246.28  | 485.27  |
| 0.750584973 | 0.62 | 2.89E-06   | 678.05  | 820.25  |
| 0.163677662 | 0.62 | 1.49E-05   | 2492.86 | 1006.35 |
| 1           | 0.61 | 9.76E-06   | 1344.01 | 665.98  |
| 0.443281771 | 0.61 | 0.00016218 | 487.39  | 462.20  |
| 1           | 0.60 | 3.75E-06   | 455.16  | 3521.81 |
| 1           | 0.59 | 0.01396428 | 251.53  | 210.82  |
| 1           | 0.58 | 2.86E-07   | 2449.90 | 4440.53 |
| 1           | 0.58 | 2.13E-05   | 644.73  | 1898.76 |

|             |        |            |          |          |
|-------------|--------|------------|----------|----------|
| 0.95783597  | 0.56   | 0.00137007 | 102.10   | 347.02   |
| 1           | 0.56   | 0.03969995 | 525.95   | 1513.14  |
| 1           | 0.56   | 0.0020385  | 20117.50 | 5608.21  |
| 1           | 0.55   | 0.00014127 | 2299.02  | 5273.04  |
| 0.704064431 | 0.54   | 0.00415034 | 499.67   | 352.71   |
| 1           | 0.54   | 1.87E-05   | 1013.43  | 1865.40  |
| 0.592972341 | 0.53   | 0.00503337 | 440.10   | 212.17   |
| 0.678556436 | 0.53   | 0.01667619 | 312.54   | 222.63   |
| 0.253394324 | 0.52   | 5.44E-06   | 486.21   | 4554.58  |
| 1           | 0.52   | 0.00359891 | 593.75   | 424.88   |
| 1           | 0.51   | 1.57E-05   | 2360.27  | 2378.28  |
| 1           | 0.50   | 8.82E-06   | 12835.73 | 11605.74 |
| 0.116433794 | 0.50   | 0.00441462 | 569.33   | 525.05   |
| 0.113593079 | 0.50   | 0.00292299 | 6672.04  | 8158.73  |
| 0.706722258 | 0.50   | 0.01247514 | 542.82   | 321.63   |
| 0.578933822 | 0.49   | 0.00023507 | 5724.49  | 1481.00  |
| 0.192194213 | 0.49   | 0.00143581 | 1174.76  | 726.64   |
| 0.609863121 | 0.47   | 6.04E-05   | 3685.62  | 4465.97  |
| 0.633345444 | 0.47   | 0.00026994 | 1625.68  | 1478.27  |
| 1           | 0.46   | 0.02116721 | 8703.13  | 11378.79 |
| 0.28250991  | 0.46   | 0.01126561 | 352.90   | 536.74   |
| 0.589880887 | 0.45   | 0.01350593 | 685.39   | 602.12   |
| 0.690884815 | 0.45   | 0.00013947 | 6097.80  | 4517.83  |
| 0.409651689 | 0.44   | 0.0455293  | 745.25   | 289.86   |
| 0.550073192 | 0.43   | 0.00664323 | 946.07   | 565.98   |
| 1           | 0.42   | 0.00088304 | 2310.14  | 2368.62  |
| 0.100036751 | 0.42   | 0.02624497 | 546.28   | 631.62   |
| 0.620901277 | 0.42   | 0.00727112 | 1087.88  | 897.93   |
| 0.765308227 | 0.41   | 0.00050733 | 12333.09 | 6595.97  |
| 1           | 0.40   | 0.00793824 | 1361.91  | 955.09   |
| 0.943146986 | 0.40   | 0.0016872  | 4838.70  | 2590.44  |
| 0.25261531  | 0.35   | 0.03455382 | 1313.03  | 1055.01  |
| 0.650175373 | log(0) | 0.02619489 | 20.21    | 5.34     |
| 0.797543155 | log(0) | 0.00702193 | 23.08    | 3.28     |
| 0.632807792 | log(0) | 0.01275139 | 42.88    | 3.46     |
| 0.547063603 | log(0) | 0.03376808 | 31.25    | 2.58     |
| 0.189294923 | -0.30  | 0.03833207 | 3320.25  | 2567.25  |
| 0.433018562 | -0.30  | 0.03749385 | 1996.05  | 5127.66  |
| 1           | -0.32  | 0.02287048 | 463.20   | 5329.64  |
| 0.531555931 | -0.33  | 0.00871708 | 6741.20  | 20917.88 |
| 0.278354504 | -0.34  | 0.01219577 | 1948.45  | 2567.00  |
| 1           | -0.35  | 0.0112171  | 1082.61  | 2160.12  |

|             |       |            |          |          |
|-------------|-------|------------|----------|----------|
| 0.167281066 | -0.36 | 0.00529531 | 4877.18  | 2645.07  |
| 0.830709492 | -0.37 | 0.00299104 | 4260.16  | 9543.09  |
| 1           | -0.37 | 0.04230533 | 1131.42  | 784.27   |
| 0.929637381 | -0.38 | 0.00088293 | 6557.79  | 51978.95 |
| 0.561924989 | -0.40 | 0.01051251 | 7735.48  | 11088.02 |
| 0.280300348 | -0.40 | 0.00154336 | 1460.96  | 12307.94 |
| 0.962841443 | -0.41 | 0.00275833 | 578.84   | 1928.11  |
| 0.78909221  | -0.42 | 0.00027236 | 46151.09 | 17012.98 |
| 0.127220267 | -0.42 | 0.00987235 | 1013.09  | 881.74   |
| 1           | -0.42 | 0.00068117 | 16029.67 | 4013.54  |
| 1           | -0.43 | 0.00111963 | 832.95   | 2314.83  |
| 1           | -0.43 | 0.00033049 | 9768.61  | 8588.25  |
| 0.071322167 | -0.45 | 0.00038498 | 1730.89  | 2406.91  |
| 0.234861676 | -0.45 | 0.01432124 | 1485.27  | 390.17   |
| 0.991700223 | -0.45 | 0.00209224 | 2280.44  | 1165.07  |
| 0.19824121  | -0.46 | 0.00010528 | 3130.85  | 3377.08  |
| 0.255905166 | -0.50 | 3.48E-05   | 1941.50  | 2590.93  |
| 1           | -0.52 | 0.00011451 | 1644.41  | 1328.18  |
| 0.153749894 | -0.53 | 5.95E-06   | 9671.69  | 4119.80  |
| 0.078593231 | -0.53 | 0.00068182 | 1102.63  | 453.02   |
| 0.202773152 | -0.53 | 4.69E-05   | 2845.66  | 1245.60  |
| 0.068532701 | -0.54 | 0.02046009 | 374.33   | 136.59   |
| 0.07294117  | -0.54 | 0.00182772 | 1697.26  | 880.42   |
| 1           | -0.57 | 6.91E-07   | 9243.86  | 13979.14 |
| 1           | -0.57 | 1.35E-05   | 3133.68  | 1715.73  |
| 0.079817838 | -0.61 | 8.47E-05   | 908.43   | 515.03   |
| 1           | -0.61 | 5.19E-08   | 4329.44  | 6881.00  |
| 0.597362705 | -0.61 | 0.02535886 | 96.11    | 11761.15 |
| 0.15807177  | -0.61 | 2.27E-05   | 1331.39  | 642.82   |
| 1           | -0.63 | 1.68E-05   | 5750.81  | 1177.37  |
| 1           | -0.63 | 8.89E-07   | 385.48   | 1552.49  |
| 0.73425876  | -0.63 | 2.78E-06   | 94092.01 | 17555.98 |
| 0.386845268 | -0.64 | 4.15E-09   | 7731.25  | 7237.99  |
| 1           | -0.64 | 0.00066522 | 1013.17  | 2615.11  |
| 0.89590341  | -0.64 | 0.00121119 | 228.74   | 315.72   |
| 1           | -0.65 | 0.00048955 | 360.20   | 408.06   |
| 1           | -0.65 | 0.0001051  | 603.10   | 468.55   |
| 1           | -0.66 | 2.24E-08   | 3727.91  | 2262.92  |
| 0.949396562 | -0.66 | 0.0041951  | 328.21   | 200.05   |
| 0.194277793 | -0.67 | 1.92E-08   | 10460.09 | 2722.99  |
| 1           | -0.68 | 9.26E-06   | 3635.04  | 811.10   |
| 1           | -0.68 | 0.00094435 | 531.39   | 317.43   |

|             |       |            |          |          |
|-------------|-------|------------|----------|----------|
| 1           | -0.69 | 7.44E-07   | 1224.64  | 953.52   |
| 1           | -0.71 | 9.61E-08   | 773.42   | 1195.54  |
| 0.084746202 | -0.73 | 0.00041251 | 215.28   | 240.75   |
| 0.172495071 | -0.75 | 1.89E-07   | 3852.16  | 713.60   |
| 0.766431843 | -0.76 | 0.01117664 | 145.09   | 141.06   |
| 1           | -0.76 | 1.84E-05   | 571.44   | 425.05   |
| 0.317442694 | -0.77 | 5.81E-14   | 31979.57 | 26596.20 |
| 0.096789531 | -0.78 | 4.74E-11   | 3946.80  | 1374.63  |
| 0.689652597 | -0.78 | 2.32E-11   | 956.47   | 1448.90  |
| 1           | -0.80 | 3.71E-08   | 1457.53  | 562.17   |
| 1           | -0.81 | 1.82E-07   | 697.42   | 526.19   |
| 1           | -0.84 | 6.27E-07   | 1331.69  | 383.48   |
| 1           | -0.84 | 0.00042484 | 212.83   | 161.32   |
| 0.148633497 | -0.85 | 1.11E-15   | 40794.18 | 10232.54 |
| 1           | -0.85 | 7.60E-07   | 1237.82  | 352.67   |
| 0.49379537  | -0.88 | 1.11E-08   | 2527.53  | 1078.69  |
| 0.150089295 | -0.90 | 1.06E-10   | 19551.93 | 20315.02 |
| 1           | -0.92 | 6.19E-07   | 712.70   | 273.45   |
| 0.42412443  | -0.93 | 6.20E-17   | 4455.12  | 4232.00  |
| 0.173531612 | -0.93 | 4.27E-10   | 746.11   | 508.69   |
| 1           | -0.94 | 7.01E-07   | 200.52   | 1425.55  |
| 1           | -0.98 | 1.21E-06   | 254.68   | 228.80   |
| 0.465986159 | -0.99 | 3.37E-05   | 140.71   | 128.06   |
| 0.081765035 | -1.03 | 4.66E-08   | 2957.67  | 1574.75  |
| 1           | -1.04 | 0.00603162 | 263.45   | 62.10    |
| 1           | -1.07 | 6.06E-13   | 1025.91  | 587.85   |
| 1           | -1.14 | 2.74E-07   | 416.08   | 199.79   |
| 0.668192693 | -1.18 | 1.05E-06   | 288.37   | 123.90   |
| 0.391977494 | -1.18 | 2.08E-13   | 1435.38  | 459.67   |
| 0.31724515  | -1.20 | 2.25E-13   | 883.03   | 1097.63  |
| 1           | -1.21 | 1.98E-05   | 227.73   | 140.75   |
| 0.800266842 | -1.28 | 5.77E-11   | 470.06   | 338.04   |
| 0.130388709 | -1.30 | 1.55E-19   | 4252.06  | 2744.07  |
| 1           | -1.41 | 4.77E-16   | 2857.19  | 341.20   |
| 0.811106684 | -1.43 | 1.59E-10   | 355.89   | 164.95   |
| 0.175910396 | -1.50 | 8.56E-08   | 427.42   | 89.02    |
| 0.590985784 | -1.61 | 9.61E-05   | 294.57   | 39.48    |
| 1           | -1.84 | 1.43E-09   | 304.39   | 108.54   |
| 1           | -1.99 | 0.00140703 | 77.47    | 44.42    |
| 0.137847306 | -2.07 | 7.57E-06   | 120.83   | 36.15    |
| 0.59964902  | -2.57 | 3.96E-08   | 182.13   | 33.39    |
| 0.829853927 | -2.61 | 1.92E-09   | 87.66    | 52.91    |



|             |       |            |         |         |
|-------------|-------|------------|---------|---------|
| 0.628991666 | -2.83 | 2.47E-09   | 149.96  | 60.96   |
| 0.200656411 | -2.92 | 2.92E-09   | 107.96  | 27.97   |
| 0.059685625 | -2.94 | 9.40E-11   | 190.33  | 48.36   |
| 0.097961803 | -2.97 | 9.36E-12   | 229.52  | 54.71   |
| 0.153749894 | -3.43 | 8.80E-05   | 30.77   | 9.02    |
| 0.750461578 | -3.48 | 0.00014159 | 61.14   | 7.53    |
| 0.461367412 | -3.50 | 1.59E-08   | 94.41   | 20.00   |
| 0.26834341  | -3.83 | 1.84E-06   | 586.64  | 57.34   |
| 0.601868058 | -4.21 | 5.05E-09   | 111.31  | 26.70   |
| 1           | -4.41 | 0.00644285 | 11.55   | 13.22   |
| 0.294960159 | -4.69 | 3.50E-07   | 701.57  | 45.21   |
| 0.473073063 | -4.84 | 0.00011603 | 35.70   | 6.13    |
| 0.531831626 | -4.96 | 6.80E-07   | 586.77  | 43.37   |
| 0.044389826 | 0.51  | 0.15092803 | 123.35  | 86.70   |
| 6.64E-06    | 0.30  | 0.10714014 | 2821.76 | 453.37  |
| 1.98E-06    | 0.27  | 0.37838826 | 4471.45 | 729.54  |
| 0.000149164 | 0.24  | 0.82513659 | 513.00  | 64.91   |
| 0.003221757 | 0.21  | 0.61195587 | 662.38  | 299.92  |
| 0.019366688 | 0.17  | 0.67820267 | 390.27  | 627.99  |
| 0.000111146 | 0.03  | 1          | 142.07  | 327.28  |
| 0.002786324 | 0.01  | 1          | 759.79  | 1230.72 |
| 0.002549717 | 0.00  | 1          | 692.71  | 732.67  |
| 0.00050788  | 0.00  | 1          | 303.80  | 505.23  |
| 0.000721828 | -0.06 | 1          | 269.12  | 44.16   |
| 0.000107293 | -0.07 | 1          | 2276.49 | 3225.85 |
| 1.58E-05    | -0.07 | 1          | 8448.09 | 2606.03 |
| 0.000831919 | -0.12 | 0.91883456 | 3856.45 | 1003.59 |
| 0.000141069 | -0.15 | 0.61195587 | 1895.00 | 1564.53 |
| 0.013450848 | -0.18 | 0.52275394 | 1081.67 | 1298.55 |
| 6.38E-11    | -0.18 | 0.71273511 | 1394.12 | 374.46  |
| 0.003748852 | -0.18 | 0.66700657 | 848.67  | 435.29  |
| 5.88E-05    | -0.20 | 0.67202685 | 245.48  | 263.86  |
| 0.010225651 | -0.22 | 0.37209128 | 252.90  | 1240.97 |
| 0.001897984 | -0.22 | 0.39890687 | 1078.97 | 440.06  |
| 0.01511746  | -0.23 | 0.20629333 | 2819.22 | 3481.06 |
| 3.62E-06    | -0.24 | 0.72160681 | 868.93  | 93.83   |
| 0.013583814 | -0.25 | 0.13882542 | 2640.98 | 2284.18 |
| 6.31E-07    | -0.25 | 0.30132605 | 2069.94 | 644.97  |
| 5.82E-08    | -0.28 | 0.15569943 | 2007.73 | 665.68  |
| 0.000256926 | -0.28 | 0.62282409 | 182.98  | 128.28  |
| 8.17E-09    | -0.36 | 0.076365   | 931.14  | 261.72  |
| 0.029974966 | -0.37 | 0.36002886 | 56.31   | 162.32  |

|             |       |            |           |          |
|-------------|-------|------------|-----------|----------|
| 0.00014107  | -0.38 | 0.05002371 | 782.74    | 450.52   |
| 0.001778367 | -0.44 | 0.08254488 | 859.71    | 310.03   |
| 0.00656731  | -0.44 | 0.5603755  | 291.78    | 50.55    |
| 0.020360874 | -0.45 | 0.10714014 | 318.07    | 168.32   |
| 0.000834962 | -0.59 | 0.12093591 | 418.45    | 77.69    |
| 0.002921391 | -0.61 | 0.3910212  | 162.74    | 32.82    |
| 0.024661328 | -2.15 | 0.09879962 | 47.17     | 4.46     |
| 0.003725862 | -0.30 | 0.01676001 | 19117.70  | 8148.09  |
| 0.040841168 | -0.36 | 0.03953009 | 619.66    | 701.99   |
| 6.33E-14    | -0.37 | 0.01367789 | 1302.83   | 1253.14  |
| 4.15E-20    | -0.38 | 0.00894753 | 28549.03  | 4530.07  |
| 3.33E-20    | -0.39 | 0.00778478 | 28508.07  | 4496.85  |
| 0.001901232 | -0.40 | 0.00060998 | 9155.87   | 6614.13  |
| 0.03011452  | -0.41 | 0.03582166 | 593.04    | 633.46   |
| 4.90E-08    | -0.41 | 0.02939204 | 1593.28   | 323.17   |
| 0.025641553 | -0.42 | 0.02491934 | 303.58    | 466.50   |
| 4.21E-07    | -0.42 | 0.01256821 | 943.25    | 532.76   |
| 0.004244483 | -0.42 | 0.00088764 | 1993.75   | 1982.03  |
| 0.013178597 | -0.42 | 0.00084479 | 1121.88   | 2026.99  |
| 0.000187044 | -0.43 | 0.00111011 | 5070.32   | 1836.63  |
| 0.023216144 | -0.45 | 0.0447868  | 185.79    | 268.94   |
| 0.00137171  | -0.45 | 0.00095072 | 2895.95   | 5420.58  |
| 0.023730071 | -0.46 | 0.00025644 | 3079.96   | 1685.97  |
| 0.028628276 | -0.46 | 2.32E-05   | 92244.96  | 88481.93 |
| 0.001023799 | -0.47 | 0.00023435 | 1624.75   | 1271.73  |
| 7.88E-06    | -0.47 | 0.00010005 | 5505.76   | 1605.58  |
| 0.010058718 | -0.48 | 0.00010627 | 6044.97   | 1628.47  |
| 4.67E-06    | -0.49 | 1.28E-05   | 8463.88   | 4382.15  |
| 0.001544574 | -0.50 | 4.19E-06   | 36272.20  | 26083.23 |
| 0.001584212 | -0.50 | 5.81E-05   | 2536.69   | 1571.92  |
| 0.036869844 | -0.50 | 1.81E-05   | 2558.05   | 6160.43  |
| 0.004140365 | -0.51 | 0.00226367 | 2138.68   | 1460.10  |
| 2.99E-13    | -0.51 | 0.01304479 | 830.01    | 862.05   |
| 0.013018831 | -0.51 | 4.20E-06   | 139864.07 | 78720.95 |
| 7.62E-08    | -0.51 | 0.00647035 | 917.72    | 288.63   |
| 0.004176392 | -0.52 | 3.98E-05   | 1450.10   | 1369.41  |
| 5.88E-05    | -0.54 | 0.00128757 | 1268.49   | 640.63   |
| 0.00257838  | -0.54 | 3.00E-06   | 11456.80  | 4135.47  |
| 0.000366177 | -0.54 | 0.00045249 | 10494.98  | 1808.36  |
| 0.000582002 | -0.54 | 0.00013384 | 2579.36   | 684.72   |
| 0.001333712 | -0.54 | 0.0017854  | 139.23    | 423.65   |
| 1.74E-05    | -0.55 | 3.13E-06   | 4579.36   | 1784.74  |

|             |       |            |           |           |
|-------------|-------|------------|-----------|-----------|
| 1.08E-05    | -0.56 | 0.02476487 | 787.39    | 216.29    |
| 3.01E-07    | -0.57 | 5.22E-05   | 1908.01   | 1004.06   |
| 3.31E-10    | -0.57 | 0.00082405 | 2059.57   | 707.55    |
| 3.97E-05    | -0.57 | 1.34E-06   | 8654.67   | 2568.77   |
| 0.007237126 | -0.57 | 3.54E-05   | 315344.69 | 220854.56 |
| 0.000452268 | -0.57 | 1.01E-06   | 7156.95   | 1356.08   |
| 0.000281331 | -0.58 | 1.81E-06   | 2096.31   | 1225.83   |
| 3.73E-08    | -0.58 | 4.89E-08   | 119876.17 | 56427.48  |
| 3.17E-07    | -0.58 | 0.00056265 | 1222.59   | 378.88    |
| 4.24E-05    | -0.58 | 4.15E-06   | 39984.95  | 14949.18  |
| 0.003348942 | -0.59 | 1.06E-07   | 5929.28   | 6966.05   |
| 1.45E-08    | -0.60 | 0.00268353 | 410.10    | 142.85    |
| 0.002312632 | -0.60 | 2.65E-07   | 11946.93  | 2295.33   |
| 5.70E-05    | -0.60 | 0.00044606 | 4325.22   | 6395.61   |
| 0.000190515 | -0.60 | 2.08E-06   | 127554.94 | 90618.65  |
| 0.008298968 | -0.61 | 7.70E-06   | 8928.49   | 2644.88   |
| 0.001258808 | -0.61 | 3.19E-09   | 152595.47 | 168036.93 |
| 1.05E-05    | -0.61 | 1.69E-06   | 1774.16   | 1100.36   |
| 0.040841168 | -0.61 | 7.10E-06   | 1162.71   | 830.23    |
| 0.000164402 | -0.62 | 7.49E-05   | 1937.36   | 818.46    |
| 0.000884469 | -0.62 | 1.41E-06   | 729.86    | 1125.85   |
| 1.38E-08    | -0.62 | 0.00510845 | 713.97    | 140.27    |
| 1.41E-06    | -0.62 | 1.46E-06   | 4946.70   | 960.75    |
| 7.74E-05    | -0.63 | 4.78E-08   | 3794.27   | 1573.80   |
| 0.002389111 | -0.63 | 3.32E-09   | 58388.50  | 27117.48  |
| 0.002203334 | -0.63 | 0.00139179 | 1590.95   | 205.40    |
| 0.019858454 | -0.63 | 2.30E-05   | 970.30    | 754.91    |
| 0.000342107 | -0.63 | 2.04E-08   | 2708.20   | 1933.50   |
| 7.37E-06    | -0.64 | 2.58E-07   | 860.80    | 1168.45   |
| 0.000688456 | -0.65 | 7.70E-06   | 906.26    | 571.01    |
| 0.041762796 | -0.65 | 1.08E-06   | 1496.33   | 924.11    |
| 0.00242712  | -0.66 | 1.06E-09   | 7056.34   | 5698.27   |
| 0.001149404 | -0.66 | 8.46E-06   | 805.33    | 699.33    |
| 0.000123711 | -0.66 | 0.00190651 | 654.91    | 646.46    |
| 7.98E-05    | -0.66 | 4.80E-07   | 1078.51   | 923.62    |
| 0.000412132 | -0.67 | 0.00010005 | 940.36    | 1064.24   |
| 0.000151261 | -0.67 | 3.57E-08   | 3666.95   | 1628.43   |
| 0.000704322 | -0.67 | 2.57E-10   | 18497.21  | 4206.10   |
| 0.005123539 | -0.68 | 4.34E-10   | 3250.55   | 3340.16   |
| 0.001160818 | -0.68 | 4.62E-11   | 133221.67 | 33218.51  |
| 0.006619303 | -0.68 | 6.24E-07   | 4118.79   | 742.57    |
| 0.003593917 | -0.69 | 0.00244957 | 444.46    | 123.90    |

|             |       |            |          |          |
|-------------|-------|------------|----------|----------|
| 0.048079439 | -0.69 | 5.15E-06   | 2054.62  | 494.38   |
| 0.000883778 | -0.69 | 7.32E-06   | 1442.32  | 571.18   |
| 2.03E-05    | -0.70 | 1.11E-08   | 2529.76  | 940.92   |
| 0.0003393   | -0.71 | 8.85E-05   | 1126.73  | 231.65   |
| 4.97E-46    | -0.72 | 3.26E-06   | 2396.63  | 205.62   |
| 1.01E-05    | -0.72 | 1.06E-11   | 5306.03  | 5156.06  |
| 0.011861686 | -0.72 | 1.46E-11   | 7055.70  | 6575.86  |
| 7.25E-07    | -0.73 | 6.04E-08   | 2954.65  | 714.13   |
| 0.000571718 | -0.74 | 1.41E-09   | 846.58   | 1318.03  |
| 4.25E-15    | -0.75 | 4.52E-09   | 353.64   | 977.15   |
| 3.70E-07    | -0.75 | 2.69E-09   | 1172.79  | 875.44   |
| 6.39E-05    | -0.75 | 8.03E-05   | 90.55    | 232.22   |
| 1.89E-08    | -0.76 | 3.28E-07   | 1274.12  | 668.91   |
| 1.88E-13    | -0.76 | 3.76E-07   | 1728.04  | 342.64   |
| 3.70E-05    | -0.77 | 1.07E-08   | 561.69   | 622.56   |
| 2.67E-11    | -0.77 | 0.00011362 | 494.35   | 116.37   |
| 2.47E-05    | -0.78 | 5.73E-15   | 20439.65 | 27341.14 |
| 0.000553948 | -0.78 | 4.13E-10   | 36712.15 | 13216.81 |
| 0.021481698 | -0.79 | 1.37E-06   | 1431.69  | 887.24   |
| 1.18E-06    | -0.80 | 2.74E-06   | 890.74   | 176.42   |
| 0.000121618 | -0.80 | 1.07E-09   | 3721.41  | 1262.33  |
| 0.000446071 | -0.81 | 5.61E-08   | 3635.56  | 389.35   |
| 3.73E-08    | -0.81 | 9.68E-09   | 742.78   | 453.19   |
| 5.38E-06    | -0.81 | 3.83E-05   | 3216.80  | 2355.88  |
| 0.015294331 | -0.82 | 4.78E-12   | 18148.17 | 7162.18  |
| 0.008116034 | -0.82 | 2.57E-05   | 81841.39 | 41889.75 |
| 0.000265116 | -0.83 | 0.00011578 | 524.81   | 110.68   |
| 0.000651562 | -0.83 | 0.00365276 | 981.33   | 94.23    |
| 1.30E-08    | -0.84 | 3.76E-09   | 1375.60  | 407.63   |
| 0.011302571 | -0.84 | 4.23E-05   | 87411.65 | 46229.87 |
| 5.23E-05    | -0.85 | 1.12E-07   | 35547.67 | 6556.57  |
| 0.000759107 | -0.87 | 3.86E-08   | 1575.17  | 282.03   |
| 6.77E-08    | -0.88 | 2.60E-16   | 4464.90  | 3030.42  |
| 1.23E-09    | -0.90 | 1.24E-09   | 2631.46  | 499.59   |
| 0.005555149 | -0.90 | 2.49E-05   | 688.03   | 250.07   |
| 0.000413998 | -0.90 | 2.91E-06   | 456.09   | 469.12   |
| 5.88E-05    | -0.90 | 3.02E-09   | 1013.98  | 399.88   |
| 1.63E-07    | -0.92 | 1.33E-15   | 12041.88 | 2519.56  |
| 1.08E-10    | -0.92 | 2.17E-11   | 1137.47  | 479.67   |
| 0.036268751 | -0.94 | 4.78E-12   | 5771.23  | 550.89   |
| 0.000174454 | -0.94 | 1.16E-06   | 1190.67  | 356.34   |
| 2.88E-11    | -0.94 | 1.52E-18   | 4917.07  | 2173.00  |

|             |       |            |         |        |
|-------------|-------|------------|---------|--------|
| 1.76E-05    | -0.97 | 1.08E-06   | 556.77  | 144.78 |
| 5.85E-19    | -0.97 | 1.46E-16   | 1127.06 | 886.51 |
| 2.99E-08    | -0.97 | 2.91E-10   | 1894.47 | 306.40 |
| 0.001160818 | -0.98 | 2.71E-08   | 290.22  | 208.46 |
| 2.22E-23    | -0.99 | 1.51E-17   | 2729.75 | 801.65 |
| 9.06E-07    | -0.99 | 8.96E-06   | 445.68  | 94.97  |
| 0.013959322 | -0.99 | 1.17E-06   | 943.99  | 272.04 |
| 0.000301588 | -1.01 | 0.00103912 | 456.67  | 80.31  |
| 0.000175175 | -1.02 | 5.50E-06   | 345.28  | 99.87  |
| 0.000148245 | -1.04 | 2.45E-05   | 394.74  | 107.71 |
| 0.018818984 | -1.17 | 0.00216546 | 132.50  | 47.14  |
| 1.69E-10    | -1.20 | 3.44E-15   | 1198.54 | 263.87 |
| 3.61E-20    | -1.26 | 7.75E-26   | 3415.08 | 501.12 |
| 9.48E-12    | -1.31 | 5.71E-16   | 389.16  | 192.70 |
| 1.89E-08    | -1.33 | 1.21E-14   | 597.41  | 189.55 |
| 3.79E-09    | -1.39 | 2.77E-16   | 1296.84 | 167.80 |
| 0.024661328 | -1.40 | 0.00057219 | 496.26  | 39.78  |
| 0.003253767 | -1.49 | 6.52E-06   | 348.12  | 41.75  |
| 0.000394931 | -1.56 | 2.67E-22   | 2683.35 | 401.82 |
| 0.007589164 | -1.95 | 4.12E-08   | 3071.29 | 473.12 |
| 6.34E-08    | -2.12 | 7.81E-32   | 474.07  | 191.17 |
| 0.000884469 | -2.16 | 3.96E-07   | 170.11  | 18.21  |
| 0.020937178 | -2.26 | 3.75E-06   | 138.26  | 25.73  |
| 4.47E-05    | -2.33 | 4.03E-12   | 206.05  | 46.04  |
| 0.01325138  | -2.42 | 4.61E-18   | 266.70  | 79.70  |
| 0.007258025 | -2.69 | 4.53E-09   | 156.54  | 23.46  |
| 0.000132586 | -2.85 | 2.23E-09   | 144.88  | 14.88  |
| 0.002282776 | -3.26 | 1.11E-40   | 520.64  | 151.26 |
| 0.000141591 | -3.30 | 1.37E-05   | 139.27  | 4.55   |
| 0.000660677 | -3.42 | 5.00E-18   | 470.78  | 54.97  |
| 9.80E-11    | -3.43 | 1.99E-17   | 319.88  | 25.52  |
| 5.21E-06    | -3.69 | 4.96E-23   | 302.48  | 50.81  |
| 0.010506476 | -3.79 | 2.04E-08   | 119.96  | 16.63  |
| 0.008385676 | -3.79 | 2.37E-20   | 204.27  | 55.89  |
| 8.68E-18    | -3.87 | 6.93E-41   | 496.20  | 58.25  |
| 2.02E-06    | -3.90 | 7.57E-21   | 277.12  | 49.33  |
| 0.010541753 | -3.92 | 5.22E-05   | 108.44  | 3.46   |
| 0.000568962 | -3.98 | 8.48E-15   | 259.35  | 35.06  |
| 3.37E-05    | -4.15 | 6.08E-19   | 194.61  | 24.47  |
| 0.007589164 | -4.41 | 2.61E-13   | 839.13  | 37.73  |
| 2.81E-27    | -4.49 | 1.80E-56   | 943.93  | 96.51  |
| 8.65E-28    | -4.49 | 5.63E-57   | 944.88  | 96.11  |

0.041289824 -4.91

4.72E-05

59.73

6.52

iSPCH) relative to wild type (WT) upon induction. Similarly, DOWN refers to genes with low

| mean_iSPCH | mean_WT_0h | mean_WT_6h | mean_WT_8h |
|------------|------------|------------|------------|
| 40697.93   | 177.92     | 116.55     | 120.02     |
| 1878.91    | 83.18      | 36.68      | 43.74      |
| 369.68     | 41.59      | 9.77       | 14.13      |
| 667.18     | 97.05      | 50.27      | 42.83      |
| 3716.87    | 346.59     | 270.63     | 239.65     |
| 154.29     | 55.45      | 22.94      | 17.79      |
| 269.45     | 23.11      | 44.68      | 35.59      |
| 1116.35    | 141.72     | 200.62     | 158.10     |
| 105.32     | 36.97      | 20.55      | 15.18      |
| 63.58      | 50.06      | 13.20      | 9.33       |
| 537.48     | 107.83     | 109.60     | 103.81     |
| 326.26     | 134.79     | 85.44      | 63.84      |
| 164.61     | 154.81     | 50.74      | 33.45      |
| 152.40     | 40.05      | 34.94      | 32.76      |
| 117.90     | 39.28      | 27.83      | 26.74      |
| 227.79     | 103.98     | 61.75      | 52.29      |
| 1521.96    | 566.10     | 353.85     | 350.79     |
| 1594.21    | 595.36     | 428.33     | 374.73     |
| 457.22     | 206.41     | 132.37     | 113.09     |
| 263.89     | 153.27     | 79.05      | 70.70      |
| 1008.76    | 181.00     | 297.54     | 277.38     |
| 379.99     | 199.48     | 127.60     | 106.68     |
| 1058.33    | 415.91     | 303.52     | 303.32     |
| 497.93     | 154.04     | 149.24     | 146.55     |
| 2114.01    | 1245.41    | 586.26     | 623.53     |
| 4107.70    | 867.25     | 1216.09    | 1227.03    |
| 218.75     | 53.91      | 70.07      | 65.55      |
| 182.17     | 46.21      | 46.39      | 54.82      |
| 3392.40    | 1102.16    | 1069.47    | 1041.00    |
| 209.26     | 96.28      | 87.51      | 69.48      |
| 361.17     | 213.35     | 158.28     | 121.03     |
| 1196.73    | 380.48     | 459.42     | 432.24     |
| 186.16     | 80.87      | 94.29      | 67.60      |
| 1940.80    | 999.72     | 772.10     | 714.75     |
| 843.05     | 242.61     | 280.04     | 335.62     |
| 5593.06    | 1789.94    | 2077.56    | 2312.69    |

|         |         |         |         |
|---------|---------|---------|---------|
| 1043.30 | 130.93  | 437.33  | 435.44  |
| 2341.44 | 753.26  | 1022.51 | 986.59  |
| 321.04  | 315.01  | 175.77  | 148.46  |
| 2606.78 | 727.07  | 996.24  | 1226.31 |
| 492.94  | 386.64  | 224.44  | 235.19  |
| 417.70  | 235.68  | 210.85  | 206.61  |
| 1998.03 | 93.96   | 776.35  | 991.70  |
| 3262.48 | 494.47  | 1397.33 | 1652.89 |
| 1456.66 | 1364.02 | 715.32  | 739.87  |
| 180.93  | 217.20  | 103.71  | 92.98   |
| 3637.87 | 2394.55 | 2072.27 | 2022.06 |
| 2413.86 | 13.86   | 617.50  | 1384.14 |
| 421.32  | 248.77  | 238.90  | 243.06  |
| 1230.39 | 827.97  | 719.15  | 712.32  |
| 1624.37 | 998.18  | 941.61  | 964.78  |
| 393.20  | 622.32  | 263.46  | 241.76  |
| 411.49  | 802.55  | 250.39  | 255.54  |
| 570.44  | 127.85  | 278.15  | 354.85  |
| 2825.62 | 3320.33 | 2089.95 | 1763.48 |
| 535.71  | 90.88   | 346.73  | 342.82  |
| 3591.69 | 661.60  | 2084.00 | 2331.01 |
| 427.71  | 626.17  | 275.45  | 279.22  |
| 647.89  | 1089.83 | 399.64  | 429.29  |
| 454.65  | 403.58  | 311.39  | 305.17  |
| 4627.87 | 5424.52 | 3096.29 | 3121.20 |
| 1019.27 | 301.15  | 481.13  | 696.01  |
| 9737.77 | 1786.86 | 5397.23 | 7108.59 |
| 428.85  | 2494.68 | 349.36  | 349.33  |
| 4925.76 | 3343.44 | 2234.90 | 4103.08 |
| 4976.04 | 3362.69 | 2281.29 | 4152.07 |
| 1937.69 | 1816.13 | 1839.79 | 1917.08 |
| 468.29  | 425.15  | 411.84  | 490.39  |
| 820.86  | 866.48  | 878.81  | 864.47  |
| 130.87  | 348.90  | 233.86  | 176.85  |
| 44.31   | 70.09   | 62.35   | 71.75   |
| 438.82  | 1930.89 | 695.63  | 604.75  |
| 21.71   | 3.85    | 2.46    | 0.44    |
| 11.52   | 6.16    | 0.95    | 0.57    |
| 25.59   | 34.66   | 2.01    | 1.44    |
| 50.24   | 20.03   | 7.79    | 3.71    |
| 282.66  | 1.54    | 33.75   | 34.23   |
| 135.07  | 13.86   | 32.54   | 16.84   |



|          |         |         |         |
|----------|---------|---------|---------|
| 35.05    | 39.28   | 12.37   | 4.45    |
| 37.39    | 6.16    | 7.79    | 4.84    |
| 29.68    | 20.80   | 22.30   | 4.32    |
| 393.82   | 8.47    | 48.14   | 62.72   |
| 48.25    | 3.85    | 18.42   | 7.94    |
| 70.75    | 6.16    | 18.00   | 11.78   |
| 231.27   | 12.32   | 51.81   | 40.74   |
| 130.83   | 13.86   | 34.25   | 23.99   |
| 89.08    | 29.27   | 30.88   | 17.27   |
| 189.24   | 47.75   | 56.25   | 37.24   |
| 136.97   | 34.66   | 44.11   | 28.22   |
| 191.78   | 28.50   | 59.89   | 45.49   |
| 226.25   | 57.77   | 61.61   | 54.73   |
| 1323.51  | 130.16  | 393.01  | 323.81  |
| 104.35   | 22.34   | 36.65   | 26.04   |
| 94.57    | 3.85    | 34.76   | 23.94   |
| 782.76   | 102.44  | 200.85  | 198.88  |
| 463.00   | 137.87  | 138.02  | 120.89  |
| 128.75   | 45.44   | 34.58   | 33.67   |
| 5916.48  | 4321.59 | 1831.32 | 1625.85 |
| 445.22   | 117.07  | 158.81  | 137.08  |
| 121.41   | 41.59   | 52.31   | 38.16   |
| 180.23   | 43.13   | 56.61   | 56.88   |
| 371.35   | 63.93   | 130.38  | 119.60  |
| 377.29   | 203.33  | 145.25  | 123.12  |
| 120.51   | 50.83   | 37.10   | 39.73   |
| 413.80   | 50.06   | 147.35  | 138.47  |
| 888.57   | 70.86   | 400.15  | 298.93  |
| 1174.89  | 627.71  | 480.93  | 405.21  |
| 1488.47  | 1806.12 | 600.74  | 519.58  |
| 122.10   | 34.66   | 44.47   | 43.05   |
| 91.27    | 43.13   | 46.01   | 32.40   |
| 141.92   | 168.67  | 83.82   | 50.81   |
| 309.72   | 511.41  | 107.32  | 112.17  |
| 315.65   | 74.71   | 129.76  | 115.67  |
| 74.96    | 94.73   | 44.15   | 27.83   |
| 1319.64  | 616.93  | 953.23  | 491.80  |
| 1786.96  | 701.65  | 661.44  | 666.73  |
| 485.83   | 351.21  | 236.35  | 181.92  |
| 91.30    | 3.85    | 42.63   | 34.59   |
| 14069.72 | 3576.04 | 7881.52 | 5360.10 |
| 973.42   | 405.90  | 383.07  | 374.98  |

|         |         |         |         |
|---------|---------|---------|---------|
| 229.06  | 83.95   | 86.69   | 89.36   |
| 725.50  | 150.96  | 288.60  | 283.24  |
| 349.76  | 127.08  | 172.71  | 137.65  |
| 380.16  | 64.70   | 150.19  | 149.73  |
| 1346.18 | 1069.04 | 715.87  | 532.52  |
| 186.12  | 59.31   | 66.14   | 73.97   |
| 323.18  | 47.75   | 141.81  | 131.41  |
| 328.85  | 103.21  | 171.42  | 136.04  |
| 225.37  | 174.84  | 85.82   | 93.77   |
| 132.10  | 114.76  | 68.83   | 54.99   |
| 705.24  | 574.57  | 361.28  | 298.35  |
| 318.03  | 533.75  | 171.53  | 134.93  |
| 464.59  | 43.90   | 209.85  | 197.61  |
| 119.36  | 36.97   | 51.13   | 50.85   |
| 514.17  | 174.07  | 236.34  | 219.56  |
| 155.47  | 97.82   | 27.38   | 66.48   |
| 497.77  | 281.89  | 248.48  | 212.88  |
| 616.60  | 697.80  | 289.18  | 267.37  |
| 328.55  | 96.28   | 169.17  | 142.53  |
| 317.38  | 355.83  | 147.82  | 137.78  |
| 97.22   | 69.32   | 45.71   | 42.74   |
| 244.66  | 103.21  | 131.19  | 107.63  |
| 125.63  | 20.80   | 69.52   | 55.31   |
| 411.70  | 110.14  | 152.42  | 182.17  |
| 208.16  | 121.69  | 108.09  | 92.24   |
| 456.39  | 843.37  | 252.50  | 202.28  |
| 243.23  | 65.47   | 126.00  | 108.12  |
| 2703.60 | 589.97  | 1453.37 | 1212.95 |
| 247.53  | 101.67  | 121.80  | 111.65  |
| 590.67  | 149.42  | 262.10  | 269.19  |
| 264.56  | 136.33  | 136.63  | 121.30  |
| 843.97  | 310.39  | 466.50  | 391.69  |
| 365.01  | 115.53  | 178.05  | 169.45  |
| 585.32  | 229.52  | 308.49  | 274.57  |
| 892.06  | 188.70  | 443.11  | 419.66  |
| 399.50  | 84.72   | 202.57  | 191.69  |
| 898.70  | 784.83  | 499.54  | 433.08  |
| 405.19  | 243.38  | 170.83  | 196.83  |
| 788.67  | 204.87  | 404.21  | 384.03  |
| 795.15  | 1803.04 | 452.00  | 394.72  |
| 327.84  | 107.83  | 164.10  | 162.86  |
| 525.21  | 388.18  | 280.55  | 261.78  |

|         |         |         |         |
|---------|---------|---------|---------|
| 923.56  | 386.64  | 467.29  | 463.28  |
| 459.31  | 512.95  | 283.48  | 231.72  |
| 1367.37 | 748.63  | 720.06  | 690.97  |
| 7382.67 | 1826.14 | 3608.21 | 3735.05 |
| 523.65  | 182.54  | 257.25  | 265.21  |
| 418.77  | 97.82   | 215.36  | 212.14  |
| 4395.93 | 1055.94 | 2603.73 | 2232.36 |
| 3531.23 | 1356.32 | 1826.74 | 1807.18 |
| 1599.32 | 305.77  | 963.00  | 820.13  |
| 588.30  | 128.62  | 288.57  | 301.86  |
| 1875.72 | 453.65  | 1048.81 | 965.22  |
| 377.32  | 147.11  | 205.31  | 195.83  |
| 668.33  | 167.90  | 345.94  | 347.03  |
| 1524.19 | 979.69  | 980.80  | 791.66  |
| 3610.10 | 2422.28 | 1952.74 | 1877.14 |
| 185.61  | 137.87  | 106.91  | 96.52   |
| 1680.92 | 893.43  | 924.53  | 874.60  |
| 902.48  | 922.70  | 457.15  | 474.18  |
| 670.17  | 269.57  | 340.76  | 352.66  |
| 198.86  | 73.94   | 130.74  | 105.11  |
| 484.49  | 229.52  | 267.72  | 256.54  |
| 259.43  | 154.04  | 153.30  | 137.96  |
| 5510.95 | 1416.40 | 2903.99 | 2940.08 |
| 730.47  | 1310.88 | 420.56  | 389.77  |
| 164.68  | 197.17  | 108.30  | 88.27   |
| 794.20  | 392.03  | 491.76  | 429.34  |
| 780.77  | 328.88  | 402.72  | 422.41  |
| 135.85  | 223.36  | 76.62   | 73.62   |
| 135.74  | 102.44  | 97.28   | 73.80   |
| 814.97  | 281.12  | 493.95  | 443.57  |
| 6304.48 | 1592.00 | 3935.31 | 3445.14 |
| 170.55  | 104.75  | 93.97   | 94.82   |
| 298.81  | 50.83   | 175.56  | 167.27  |
| 2911.45 | 770.20  | 1486.58 | 1634.31 |
| 139.48  | 197.17  | 79.17   | 78.38   |
| 593.38  | 683.94  | 377.39  | 337.76  |
| 1057.26 | 471.36  | 628.22  | 605.31  |
| 1237.87 | 728.61  | 762.62  | 713.00  |
| 741.05  | 734.77  | 529.30  | 426.87  |
| 1010.81 | 542.99  | 619.82  | 589.62  |
| 455.59  | 160.20  | 325.29  | 266.16  |
| 160.62  | 291.14  | 114.13  | 94.34   |

|         |         |         |         |
|---------|---------|---------|---------|
| 479.72  | 245.69  | 245.26  | 282.72  |
| 304.97  | 157.12  | 184.98  | 179.84  |
| 283.14  | 384.33  | 236.93  | 167.63  |
| 1097.24 | 1950.15 | 710.88  | 652.72  |
| 1065.00 | 532.21  | 705.96  | 634.73  |
| 1561.02 | 678.55  | 924.16  | 930.88  |
| 1322.86 | 847.99  | 836.94  | 791.09  |
| 288.45  | 245.69  | 199.01  | 172.75  |
| 956.07  | 653.13  | 863.47  | 577.15  |
| 5755.58 | 2764.25 | 3506.05 | 3478.36 |
| 649.26  | 251.86  | 380.10  | 392.91  |
| 2056.29 | 1350.16 | 1494.01 | 1251.36 |
| 501.40  | 1374.81 | 294.17  | 308.06  |
| 218.94  | 298.84  | 268.75  | 134.77  |
| 1757.49 | 1477.24 | 1175.52 | 1094.39 |
| 612.02  | 631.56  | 437.25  | 381.22  |
| 678.57  | 507.56  | 472.81  | 423.25  |
| 369.67  | 490.62  | 238.79  | 230.60  |
| 5982.77 | 5805.00 | 7166.86 | 3740.36 |
| 406.97  | 299.61  | 285.31  | 254.62  |
| 1088.54 | 767.89  | 830.93  | 686.20  |
| 458.29  | 780.21  | 305.61  | 291.27  |
| 215.93  | 374.32  | 149.15  | 137.43  |
| 192.44  | 348.90  | 141.93  | 122.57  |
| 503.55  | 284.97  | 307.70  | 322.35  |
| 1308.03 | 1055.94 | 917.75  | 840.10  |
| 3232.69 | 1130.65 | 2389.10 | 2079.71 |
| 2104.07 | 1801.50 | 1229.92 | 1355.05 |
| 457.74  | 1806.12 | 371.96  | 294.82  |
| 358.07  | 470.59  | 238.32  | 230.64  |
| 669.34  | 702.42  | 498.38  | 431.42  |
| 765.68  | 1191.50 | 531.19  | 495.66  |
| 387.43  | 160.20  | 259.56  | 250.96  |
| 734.02  | 268.80  | 467.48  | 475.96  |
| 1130.37 | 714.75  | 719.43  | 736.39  |
| 1221.11 | 2690.31 | 818.88  | 795.52  |
| 1143.79 | 1367.11 | 738.55  | 747.64  |
| 566.87  | 564.56  | 378.18  | 371.29  |
| 4595.37 | 443.64  | 3339.64 | 3025.23 |
| 235.55  | 319.63  | 187.59  | 156.36  |
| 6768.18 | 2611.75 | 4723.47 | 4522.98 |
| 2450.66 | 701.65  | 1854.35 | 1639.45 |

|          |          |          |          |
|----------|----------|----------|----------|
| 566.95   | 103.21   | 401.37   | 383.33   |
| 2881.94  | 734.77   | 1606.03  | 1949.99  |
| 8541.40  | 25074.63 | 6023.30  | 5810.36  |
| 8026.16  | 2252.84  | 5511.12  | 5493.22  |
| 406.92   | 637.73   | 307.36   | 279.31   |
| 2287.82  | 1004.34  | 1747.38  | 1571.30  |
| 360.08   | 361.99   | 258.25   | 248.71   |
| 335.13   | 348.90   | 273.94   | 231.61   |
| 8276.60  | 546.84   | 3798.98  | 5766.78  |
| 567.75   | 708.58   | 403.52   | 397.26   |
| 3004.24  | 2399.17  | 2345.15  | 2114.97  |
| 13805.86 | 13194.30 | 10830.03 | 9734.74  |
| 540.88   | 682.40   | 405.69   | 381.64   |
| 15853.36 | 6885.59  | 10692.98 | 11201.80 |
| 375.78   | 664.68   | 273.88   | 266.00   |
| 1575.09  | 7085.84  | 1342.87  | 1120.62  |
| 876.96   | 1450.29  | 604.19   | 624.59   |
| 5411.42  | 4239.18  | 3907.17  | 3894.68  |
| 1886.78  | 1827.68  | 1320.92  | 1358.22  |
| 22243.96 | 10865.21 | 11805.96 | 16123.83 |
| 607.97   | 496.01   | 430.38   | 442.66   |
| 672.33   | 850.30   | 511.98   | 491.94   |
| 5499.94  | 6827.82  | 4097.30  | 4027.42  |
| 264.26   | 915.00   | 233.40   | 194.56   |
| 796.54   | 1322.43  | 492.29   | 592.06   |
| 3351.56  | 2312.14  | 2488.49  | 2496.99  |
| 722.05   | 681.63   | 496.19   | 539.29   |
| 1007.25  | 1287.00  | 781.70   | 752.42   |
| 9537.13  | 12464.15 | 7534.54  | 7201.84  |
| 1233.13  | 1610.49  | 921.41   | 934.76   |
| 3603.97  | 5100.26  | 2908.08  | 2740.76  |
| 1255.61  | 1803.81  | 891.42   | 983.47   |
| 0.00     | 36.20    | 1.45     | 7.41     |
| 0.00     | 17.71    | 8.23     | 8.90     |
| 0.00     | 28.50    | 10.78    | 7.46     |
| 0.00     | 20.80    | 8.88     | 6.45     |
| 2595.82  | 2776.57  | 3036.40  | 3195.57  |
| 5080.68  | 1672.10  | 6029.01  | 6262.50  |
| 4813.67  | 298.07   | 5587.91  | 5991.36  |
| 20676.11 | 5632.47  | 23348.18 | 25910.79 |
| 2350.08  | 1608.95  | 3030.25  | 2971.74  |
| 1923.65  | 844.14   | 2293.23  | 2459.09  |

|          |          |          |          |
|----------|----------|----------|----------|
| 2600.00  | 4038.93  | 3145.58  | 3328.96  |
| 7630.73  | 3740.86  | 10403.33 | 9838.20  |
| 531.59   | 895.74   | 836.35   | 688.37   |
| 48610.11 | 5712.57  | 56931.69 | 63451.98 |
| 7169.72  | 7039.63  | 9473.07  | 9451.38  |
| 11298.81 | 955.82   | 14501.04 | 14952.53 |
| 1440.35  | 555.31   | 1727.60  | 1916.33  |
| 10724.67 | 37428.64 | 18819.08 | 14309.01 |
| 648.30   | 841.06   | 1103.20  | 865.09   |
| 3277.01  | 14689.26 | 3894.62  | 4394.76  |
| 1711.58  | 739.39   | 2286.71  | 2301.98  |
| 5733.69  | 8921.23  | 9140.77  | 7734.42  |
| 2123.65  | 1390.98  | 2963.15  | 2897.39  |
| 329.12   | 1226.16  | 492.22   | 449.97   |
| 776.94   | 1864.65  | 1270.78  | 1063.17  |
| 2881.62  | 2831.26  | 3967.43  | 3958.97  |
| 2010.36  | 1742.96  | 3014.69  | 2841.40  |
| 928.76   | 1436.42  | 1393.74  | 1330.33  |
| 2735.62  | 8161.04  | 4967.62  | 3959.61  |
| 419.31   | 955.82   | 598.48   | 607.09   |
| 1011.33  | 2462.33  | 1504.06  | 1465.07  |
| 174.92   | 294.22   | 198.47   | 253.89   |
| 385.70   | 1864.65  | 655.05   | 561.96   |
| 9816.37  | 10158.17 | 14482.65 | 14538.18 |
| 945.33   | 3276.43  | 1787.98  | 1406.30  |
| 401.15   | 851.07   | 664.76   | 610.88   |
| 4473.77  | 4788.33  | 6876.39  | 6816.36  |
| 11324.25 | 66.24    | 9117.39  | 17312.99 |
| 534.28   | 1134.50  | 805.21   | 817.54   |
| 441.35   | 5637.86  | 1183.22  | 681.32   |
| 997.41   | 284.97   | 1560.47  | 1540.16  |
| 10551.16 | 75747.63 | 20648.53 | 16339.19 |
| 3695.88  | 6299.47  | 8276.97  | 5753.17  |
| 1679.34  | 875.72   | 2928.22  | 2614.77  |
| 247.76   | 153.27   | 360.91   | 386.20   |
| 254.54   | 326.56   | 416.00   | 398.11   |
| 291.51   | 619.24   | 458.87   | 458.70   |
| 1293.76  | 3494.40  | 2271.63  | 2039.97  |
| 147.69   | 266.49   | 226.96   | 234.03   |
| 1418.28  | 9836.99  | 3263.59  | 2248.89  |
| 342.07   | 3331.89  | 813.24   | 546.56   |
| 157.25   | 468.28   | 306.74   | 251.27   |

|          |          |          |          |
|----------|----------|----------|----------|
| 559.51   | 1221.54  | 944.04   | 900.80   |
| 787.18   | 750.17   | 1267.13  | 1285.36  |
| 192.12   | 164.05   | 326.79   | 318.94   |
| 368.53   | 4168.32  | 904.72   | 621.76   |
| 98.77    | 114.76   | 108.71   | 167.23   |
| 222.52   | 694.72   | 430.66   | 377.08   |
| 15976.25 | 37341.61 | 31109.07 | 27261.30 |
| 881.36   | 4442.51  | 1739.34  | 1511.71  |
| 1507.61  | 1834.62  | 1290.68  | 2586.38  |
| 333.84   | 1541.17  | 576.30   | 582.61   |
| 325.00   | 640.04   | 537.05   | 571.46   |
| 223.37   | 1398.68  | 403.49   | 398.87   |
| 113.63   | 204.10   | 159.10   | 204.03   |
| 4336.73  | 45970.93 | 12686.39 | 7795.75  |
| 207.95   | 1306.26  | 369.27   | 373.84   |
| 737.44   | 2429.21  | 1330.81  | 1354.48  |
| 12695.44 | 21377.67 | 26186.97 | 23649.61 |
| 147.90   | 761.73   | 281.04   | 280.66   |
| 2681.66  | 5650.96  | 5021.24  | 5103.15  |
| 277.99   | 804.86   | 659.00   | 530.65   |
| 845.33   | 313.47   | 1495.89  | 1622.62  |
| 130.68   | 252.63   | 244.40   | 257.68   |
| 98.08    | 124.00   | 169.11   | 194.84   |
| 1269.05  | 2552.44  | 2202.88  | 2591.82  |
| 33.72    | 214.12   | 61.16    | 69.39    |
| 239.47   | 929.63   | 567.79   | 503.85   |
| 88.43    | 398.96   | 187.65   | 194.64   |
| 73.36    | 258.79   | 160.40   | 166.00   |
| 162.72   | 1579.68  | 561.02   | 369.19   |
| 561.01   | 1102.93  | 1393.07  | 1288.48  |
| 51.83    | 197.17   | 162.86   | 119.49   |
| 102.32   | 469.05   | 286.58   | 247.63   |
| 2449.10  | 9277.06  | 2177.75  | 6010.53  |
| 126.40   | 3401.20  | 374.53   | 335.84   |
| 69.88    | 391.26   | 202.90   | 188.49   |
| 47.08    | 395.88   | 138.19   | 132.75   |
| 17.59    | 318.09   | 58.53    | 53.51    |
| 24.25    | 274.96   | 107.38   | 86.93    |
| 7.75     | 75.48    | 41.95    | 30.87    |
| 10.99    | 134.79   | 63.56    | 46.10    |
| 9.00     | 170.21   | 58.98    | 53.25    |
| 10.02    | 92.42    | 71.06    | 61.23    |

|         |         |         |         |
|---------|---------|---------|---------|
| 10.45   | 171.75  | 91.71   | 74.36   |
| 7.36    | 83.95   | 54.09   | 55.78   |
| 10.02   | 227.21  | 98.97   | 76.62   |
| 11.75   | 240.30  | 103.12  | 92.20   |
| 2.22    | 22.34   | 26.47   | 23.81   |
| 1.73    | 63.16   | 15.72   | 19.36   |
| 3.32    | 97.05   | 37.60   | 37.68   |
| 9.09    | 563.79  | 178.10  | 128.90  |
| 1.73    | 111.68  | 42.45   | 31.92   |
| 0.58    | 6.93    | 10.83   | 12.30   |
| 5.19    | 652.36  | 150.36  | 134.18  |
| 0.58    | 37.74   | 17.05   | 16.49   |
| 3.46    | 562.25  | 129.66  | 108.06  |
| 161.51  | 117.07  | 142.85  | 113.09  |
| 698.39  | 2536.27 | 725.91  | 568.01  |
| 2126.55 | 6683.03 | 1298.06 | 1767.14 |
| 150.94  | 677.78  | 135.51  | 127.97  |
| 439.09  | 627.71  | 440.42  | 378.37  |
| 1014.27 | 598.45  | 858.04  | 904.44  |
| 777.65  | 173.30  | 629.56  | 759.47  |
| 1372.80 | 347.36  | 1671.45 | 1363.72 |
| 992.31  | 620.01  | 1035.22 | 994.21  |
| 791.33  | 284.20  | 814.21  | 793.57  |
| 74.08   | 271.88  | 101.66  | 77.03   |
| 4762.89 | 2151.94 | 4527.83 | 4982.51 |
| 3166.88 | 8606.22 | 3867.29 | 3328.42 |
| 1016.39 | 3426.62 | 1432.07 | 1103.97 |
| 2151.22 | 1704.45 | 2249.07 | 2386.71 |
| 1385.88 | 831.82  | 1685.88 | 1568.83 |
| 711.24  | 1203.05 | 735.41  | 806.80  |
| 583.34  | 707.81  | 627.12  | 662.29  |
| 384.79  | 191.78  | 444.55  | 440.49  |
| 1351.50 | 121.69  | 1662.35 | 1575.33 |
| 518.95  | 932.71  | 633.83  | 606.31  |
| 3635.01 | 1997.90 | 4422.34 | 4262.13 |
| 150.92  | 989.71  | 197.70  | 177.99  |
| 2484.06 | 2211.24 | 2915.12 | 2950.56 |
| 809.14  | 2171.96 | 1067.80 | 964.20  |
| 786.38  | 2005.60 | 1130.73 | 952.42  |
| 177.95  | 154.04  | 242.06  | 216.41  |
| 326.95  | 966.60  | 508.24  | 420.77  |
| 151.15  | 30.04   | 242.86  | 194.70  |



|          |           |           |           |
|----------|-----------|-----------|-----------|
| 483.19   | 709.35    | 701.25    | 627.92    |
| 207.45   | 655.44    | 473.77    | 280.87    |
| 42.35    | 231.83    | 95.89     | 57.36     |
| 172.55   | 257.25    | 255.37    | 236.00    |
| 105.97   | 372.78    | 160.49    | 159.83    |
| 33.37    | 102.44    | 77.09     | 50.77     |
| 2.65     | 31.58     | 20.43     | 11.78     |
| 9129.06  | 16174.20  | 10521.43  | 11233.22  |
| 701.64   | 517.57    | 902.82    | 899.91    |
| 1572.70  | 1364.02   | 2420.52   | 2038.30   |
| 6256.79  | 31211.59  | 10258.88  | 8150.22   |
| 6206.57  | 31173.08  | 10215.33  | 8112.40   |
| 6798.08  | 8363.60   | 8820.88   | 8995.79   |
| 719.72   | 442.09    | 862.62    | 955.08    |
| 391.46   | 1834.62   | 599.03    | 520.70    |
| 473.73   | 227.98    | 645.79    | 632.07    |
| 633.92   | 869.56    | 896.47    | 850.16    |
| 1948.28  | 1826.91   | 2588.03   | 2614.12   |
| 1881.42  | 976.61    | 2642.72   | 2524.67   |
| 1708.69  | 4963.94   | 2664.13   | 2295.37   |
| 262.85   | 139.41    | 385.41    | 358.48    |
| 4788.98  | 2689.54   | 7550.80   | 6531.70   |
| 1593.61  | 2814.31   | 2156.59   | 2189.50   |
| 76904.86 | 88312.68  | 112012.92 | 106148.80 |
| 1330.70  | 1500.35   | 1757.25   | 1844.27   |
| 1705.52  | 5251.22   | 2409.10   | 2369.36   |
| 1502.54  | 5748.77   | 2145.47   | 2101.54   |
| 3704.62  | 7803.67   | 6496.18   | 5220.89   |
| 21411.73 | 35522.40  | 34801.52  | 30220.91  |
| 1453.13  | 2364.51   | 2151.29   | 2052.33   |
| 6192.70  | 2405.33   | 7745.24   | 8747.06   |
| 1270.99  | 1778.39   | 2088.05   | 1803.81   |
| 1540.54  | 580.73    | 2115.70   | 2186.99   |
| 62306.14 | 132640.77 | 101852.19 | 88492.82  |
| 289.80   | 935.79    | 528.88    | 412.24    |
| 1237.18  | 1198.43   | 1835.11   | 1770.38   |
| 688.51   | 1179.18   | 1033.00   | 998.68    |
| 3159.20  | 10251.36  | 5488.86   | 4584.54   |
| 1131.86  | 10066.51  | 2748.88   | 1642.99   |
| 624.94   | 2436.14   | 1015.33   | 907.97    |
| 418.07   | 92.42     | 636.63    | 607.91    |
| 1854.79  | 4302.34   | 2598.90   | 2716.19   |

|           |           |           |           |
|-----------|-----------|-----------|-----------|
| 325.09    | 757.88    | 432.45    | 478.72    |
| 1110.24   | 1759.91   | 1638.41   | 1645.25   |
| 904.84    | 2044.11   | 1436.17   | 1341.64   |
| 1951.28   | 7548.73   | 3716.75   | 2895.80   |
| 170991.53 | 297202.48 | 309575.21 | 254335.01 |
| 1310.01   | 6726.93   | 1933.24   | 1950.02   |
| 1225.28   | 2024.09   | 1771.58   | 1829.37   |
| 48192.81  | 111450.26 | 87355.49  | 71987.03  |
| 367.94    | 1303.95   | 663.17    | 550.12    |
| 12708.00  | 40323.05  | 22809.06  | 19012.08  |
| 5808.01   | 5999.86   | 9237.48   | 8731.63   |
| 207.60    | 349.67    | 314.95    | 313.83    |
| 1644.48   | 9753.04   | 3115.35   | 2492.32   |
| 6708.38   | 2882.09   | 10721.97  | 10170.75  |
| 79349.39  | 115985.19 | 133746.74 | 120375.32 |
| 1981.99   | 7844.49   | 3594.56   | 3017.24   |
| 137520.87 | 139775.90 | 224414.44 | 209798.19 |
| 1016.75   | 1734.49   | 1696.15   | 1551.30   |
| 652.28    | 970.45    | 1086.00   | 998.87    |
| 686.84    | 1557.34   | 1265.86   | 1053.58   |
| 934.44    | 560.71    | 1544.49   | 1437.43   |
| 174.63    | 777.90    | 297.10    | 268.86    |
| 764.44    | 5360.59   | 1538.43   | 1177.90   |
| 1485.63   | 3439.71   | 2275.77   | 2291.28   |
| 20286.60  | 58727.75  | 36190.37  | 31315.85  |
| 211.78    | 1538.86   | 338.87    | 327.52    |
| 504.43    | 743.24    | 1005.45   | 780.63    |
| 1890.88   | 2677.22   | 2694.00   | 2933.72   |
| 1161.36   | 636.19    | 1784.85   | 1805.59   |
| 507.73    | 908.07    | 851.30    | 796.45    |
| 767.62    | 1314.73   | 1205.15   | 1204.51   |
| 4593.76   | 7047.33   | 7640.73   | 7236.62   |
| 444.64    | 722.45    | 1026.13   | 702.03    |
| 888.27    | 597.68    | 1192.89   | 1406.08   |
| 707.35    | 938.87    | 1363.17   | 1119.98   |
| 741.86    | 673.93    | 1643.87   | 1178.05   |
| 1238.93   | 3579.12   | 2350.11   | 1968.68   |
| 3370.04   | 18886.07  | 5847.70   | 5361.40   |
| 2495.62   | 3230.99   | 4383.87   | 3991.62   |
| 15630.33  | 146862.51 | 45209.75  | 25059.90  |
| 483.70    | 4234.56   | 1020.35   | 776.87    |
| 133.76    | 412.06    | 201.89    | 215.63    |

|          |          |          |          |
|----------|----------|----------|----------|
| 345.25   | 1694.44  | 659.43   | 556.88   |
| 357.12   | 1345.54  | 832.40   | 576.60   |
| 783.24   | 2353.73  | 1448.08  | 1276.34  |
| 198.12   | 1136.05  | 378.86   | 323.84   |
| 871.50   | 3021.49  | 1030.52  | 1431.78  |
| 4578.80  | 5599.35  | 7550.18  | 7548.25  |
| 4770.38  | 7169.02  | 8476.16  | 7878.38  |
| 523.34   | 3083.88  | 1168.95  | 871.01   |
| 969.25   | 817.95   | 1836.28  | 1618.90  |
| 861.82   | 241.84   | 1906.38  | 1444.68  |
| 913.14   | 998.95   | 1445.18  | 1539.08  |
| 218.01   | 53.91    | 405.52   | 367.78   |
| 643.18   | 1375.58  | 1227.26  | 1086.47  |
| 429.27   | 1732.18  | 741.50   | 729.25   |
| 571.94   | 562.25   | 952.74   | 973.00   |
| 169.02   | 546.84   | 291.00   | 288.46   |
| 21480.23 | 20577.43 | 38439.88 | 36886.86 |
| 8991.48  | 39956.44 | 19330.57 | 15468.64 |
| 507.28   | 1271.60  | 1195.70  | 878.34   |
| 184.17   | 931.17   | 334.61   | 320.99   |
| 679.17   | 3891.05  | 1889.25  | 1184.28  |
| 268.23   | 3673.85  | 615.91   | 469.02   |
| 426.24   | 729.38   | 809.24   | 746.02   |
| 2457.26  | 3028.43  | 4562.96  | 4320.77  |
| 3393.10  | 19527.65 | 9467.46  | 5984.50  |
| 28897.36 | 71001.66 | 66314.26 | 51138.81 |
| 110.70   | 473.67   | 204.34   | 196.54   |
| 58.36    | 1016.66  | 174.00   | 104.10   |
| 391.78   | 1300.87  | 746.44   | 699.05   |
| 30508.93 | 77440.53 | 73571.67 | 54665.92 |
| 4898.32  | 33114.75 | 11048.63 | 8823.93  |
| 220.18   | 1712.15  | 454.81   | 403.44   |
| 2538.51  | 4474.86  | 4788.24  | 4669.26  |
| 409.79   | 2758.86  | 981.24   | 762.33   |
| 107.10   | 597.68   | 377.35   | 199.87   |
| 390.75   | 444.41   | 786.64   | 729.30   |
| 268.39   | 878.80   | 631.75   | 501.93   |
| 2262.30  | 12837.69 | 4124.59  | 4277.12  |
| 406.16   | 1125.26  | 903.82   | 769.11   |
| 346.43   | 5953.65  | 777.99   | 662.41   |
| 329.45   | 1070.58  | 632.82   | 631.76   |
| 1869.45  | 4454.84  | 3715.89  | 3588.99  |

|        |         |         |         |
|--------|---------|---------|---------|
| 123.69 | 546.84  | 274.63  | 242.80  |
| 858.03 | 1166.08 | 1880.46 | 1684.49 |
| 247.48 | 1979.41 | 564.90  | 485.86  |
| 203.57 | 264.18  | 344.23  | 401.22  |
| 854.14 | 2424.59 | 1826.31 | 1697.65 |
| 88.36  | 375.86  | 210.41  | 175.82  |
| 188.94 | 888.81  | 413.14  | 376.31  |
| 48.25  | 425.15  | 159.28  | 97.42   |
| 97.54  | 286.51  | 191.47  | 197.64  |
| 85.92  | 404.36  | 215.38  | 176.68  |
| 30.79  | 102.44  | 91.78   | 69.39   |
| 206.94 | 1199.20 | 549.28  | 474.50  |
| 549.79 | 2937.54 | 1164.47 | 1312.36 |
| 188.44 | 370.47  | 434.09  | 467.65  |
| 141.56 | 491.39  | 386.22  | 356.55  |
| 120.46 | 1196.89 | 353.43  | 314.91  |
| 18.83  | 540.68  | 78.52   | 49.80   |
| 25.52  | 368.16  | 92.52   | 71.79   |
| 296.15 | 3793.24 | 704.11  | 875.38  |
| 200.17 | 2943.70 | 1158.13 | 773.18  |
| 86.36  | 509.87  | 388.47  | 374.66  |
| 12.09  | 158.66  | 55.69   | 54.00   |
| 8.77   | 167.90  | 60.60   | 41.91   |
| 17.15  | 210.26  | 119.13  | 86.45   |
| 24.42  | 251.09  | 142.11  | 130.98  |
| 7.75   | 141.72  | 59.72   | 50.03   |
| 6.78   | 113.22  | 51.60   | 48.77   |
| 21.85  | 646.20  | 256.74  | 209.04  |
| 2.26   | 174.07  | 27.80   | 22.24   |
| 12.81  | 498.32  | 156.76  | 137.02  |
| 6.65   | 389.72  | 107.59  | 71.57   |
| 7.31   | 391.26  | 138.85  | 94.72   |
| 2.26   | 152.50  | 46.60   | 31.27   |
| 6.12   | 232.60  | 119.10  | 84.70   |
| 11.75  | 592.28  | 230.21  | 171.23  |
| 8.77   | 353.52  | 179.86  | 130.79  |
| 1.15   | 137.87  | 18.56   | 17.49   |
| 5.05   | 375.09  | 118.27  | 79.59   |
| 3.95   | 214.12  | 75.67   | 70.26   |
| 4.52   | 807.17  | 131.14  | 96.33   |
| 14.49  | 1337.84 | 533.19  | 325.09  |
| 14.49  | 1337.84 | 533.69  | 325.09  |

0.53

63.16

24.93

15.96

over expression levels in iSPCH vs. WT.
